# Supplementary material for: Effect of chemical abrasion of zircon on SIMS U–Pb, δ 18 O, trace element, and LA-ICPMS trace element and Lu–Hf isotopic analyses
Source: Copernicus journal article supplement (doi:10.5194/gchron-6-337-2024), 2024-07-10

T2U: Untreated Temora 2

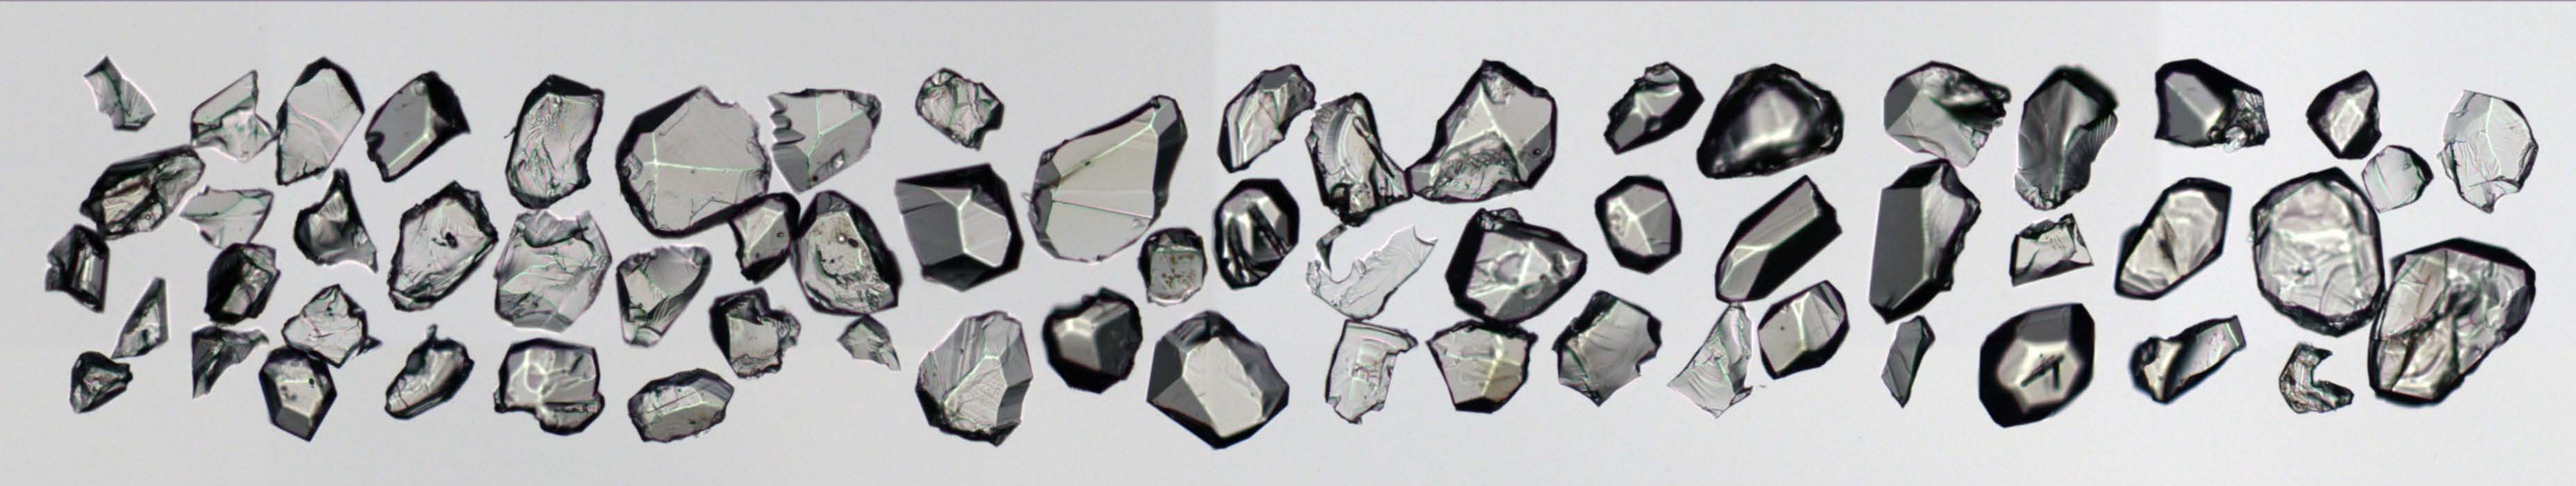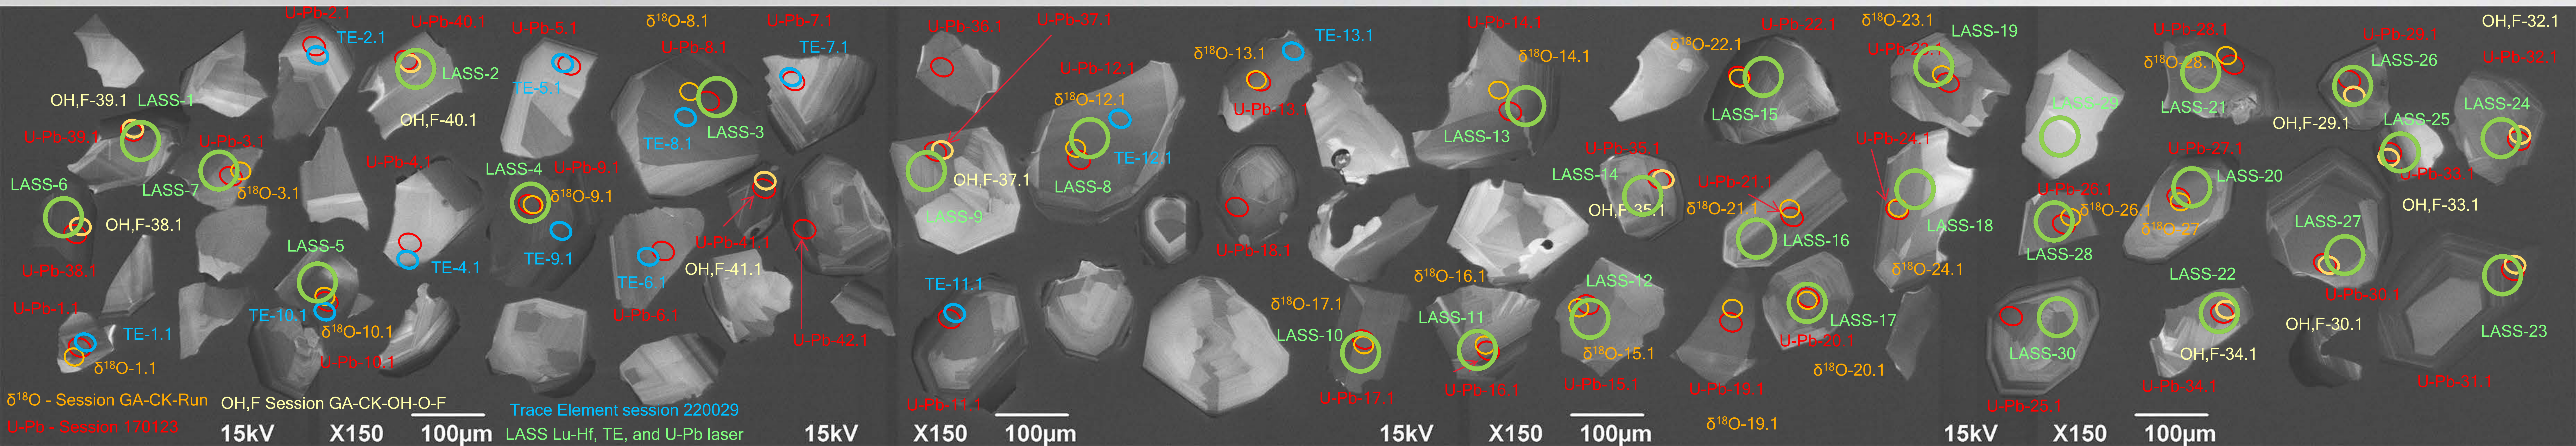



T2C: Chemically abraded Temora 2

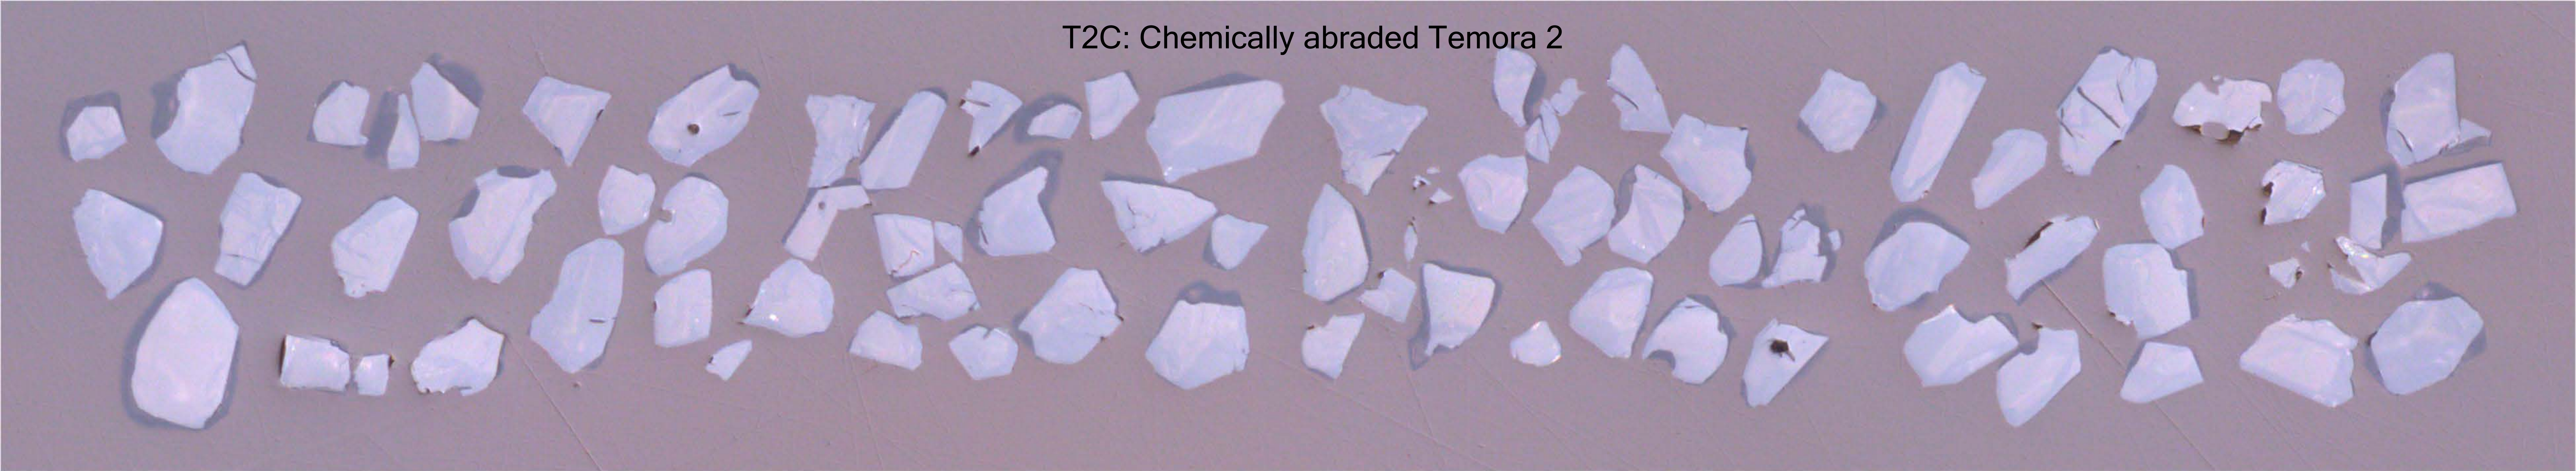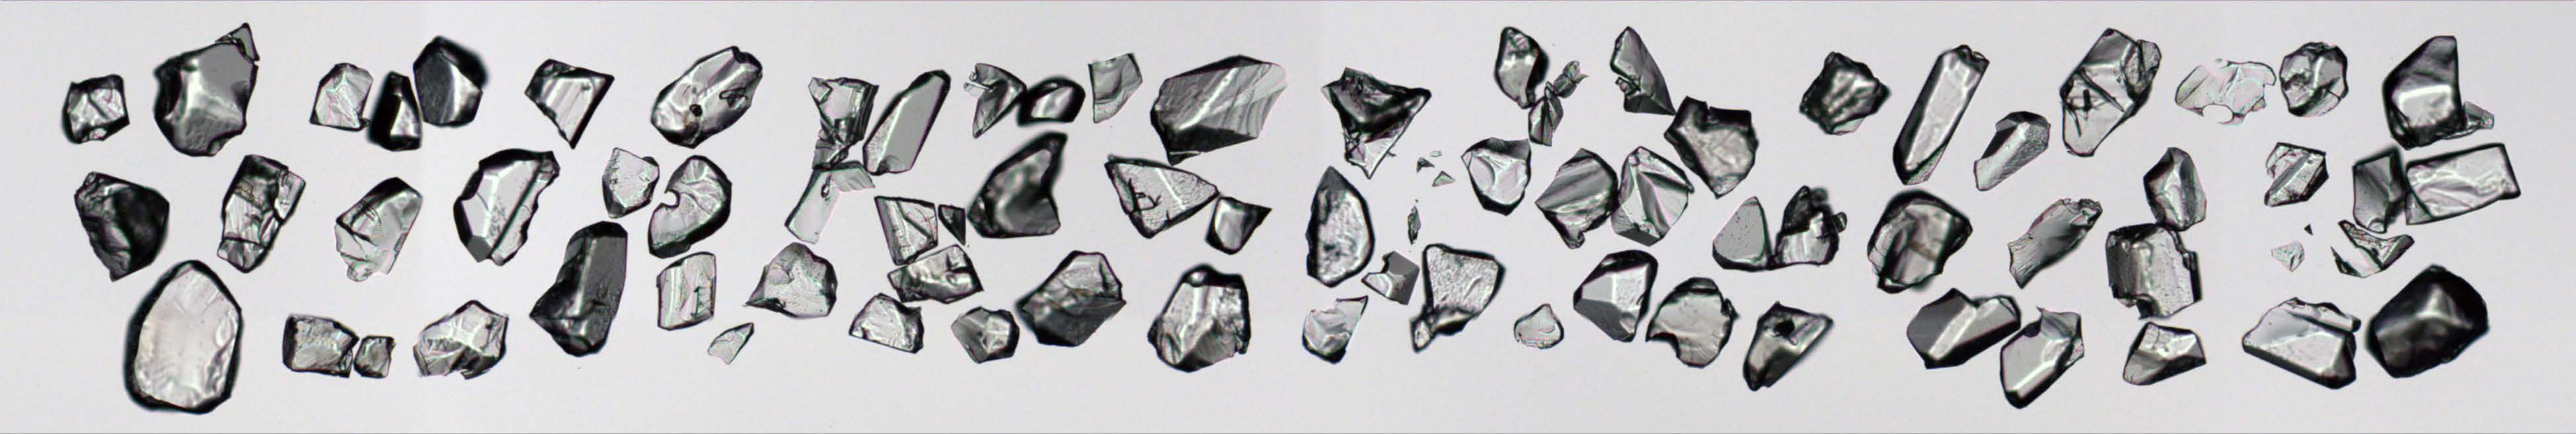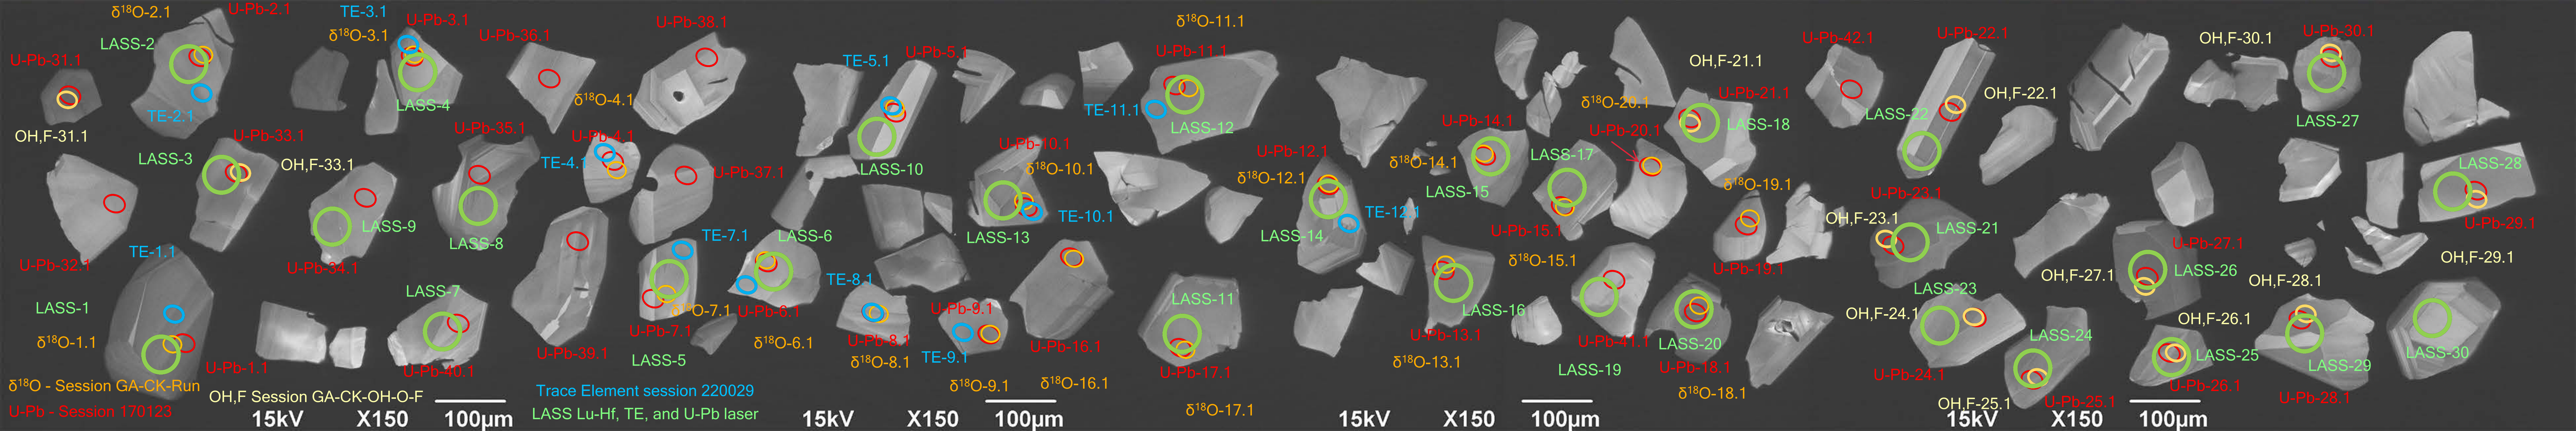



91U: Untreated 91500

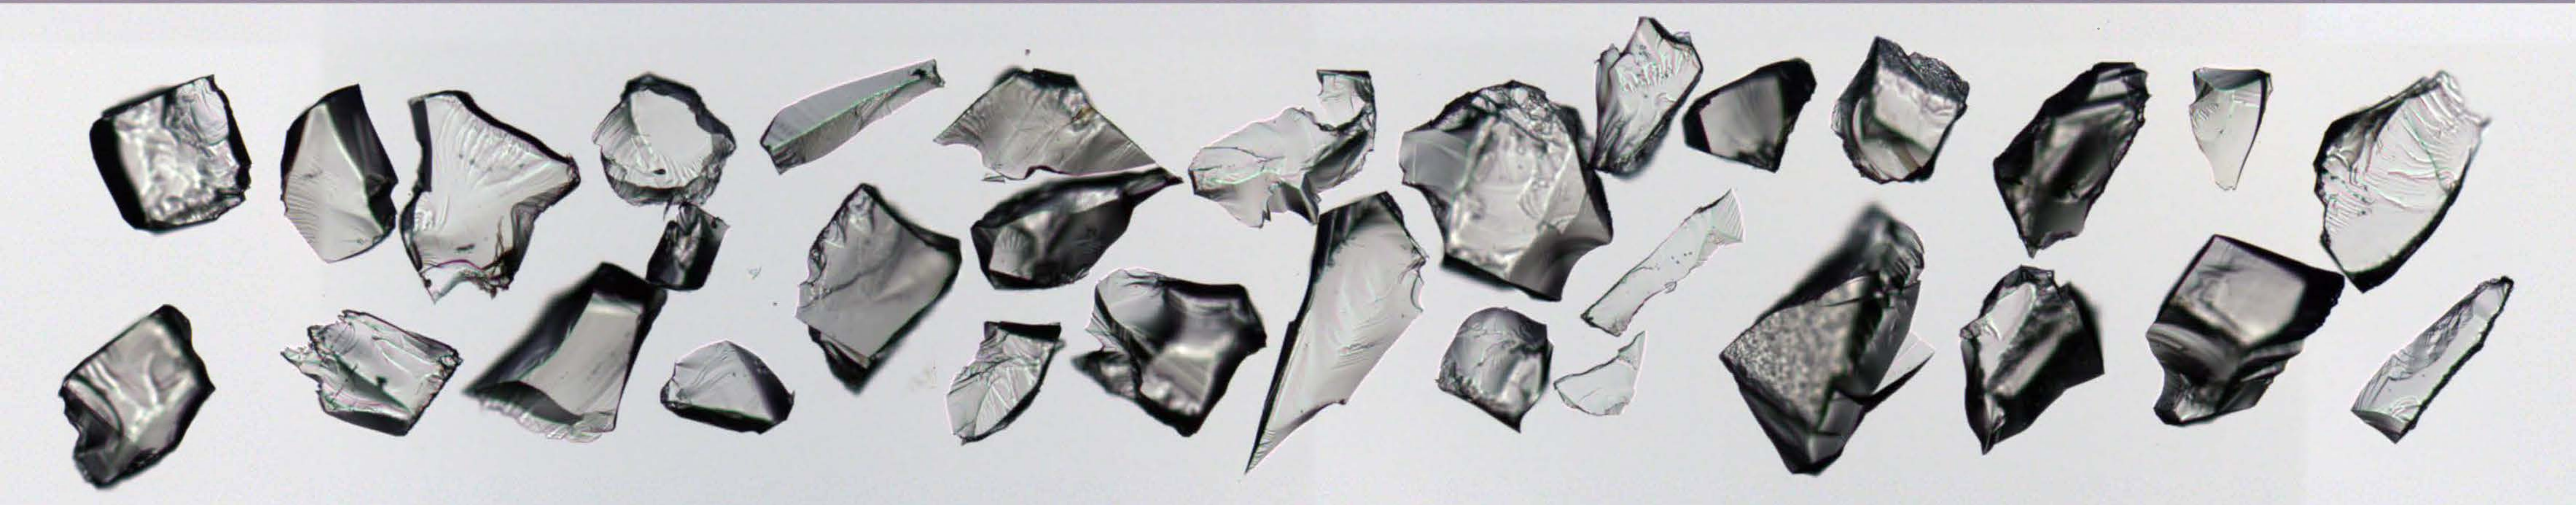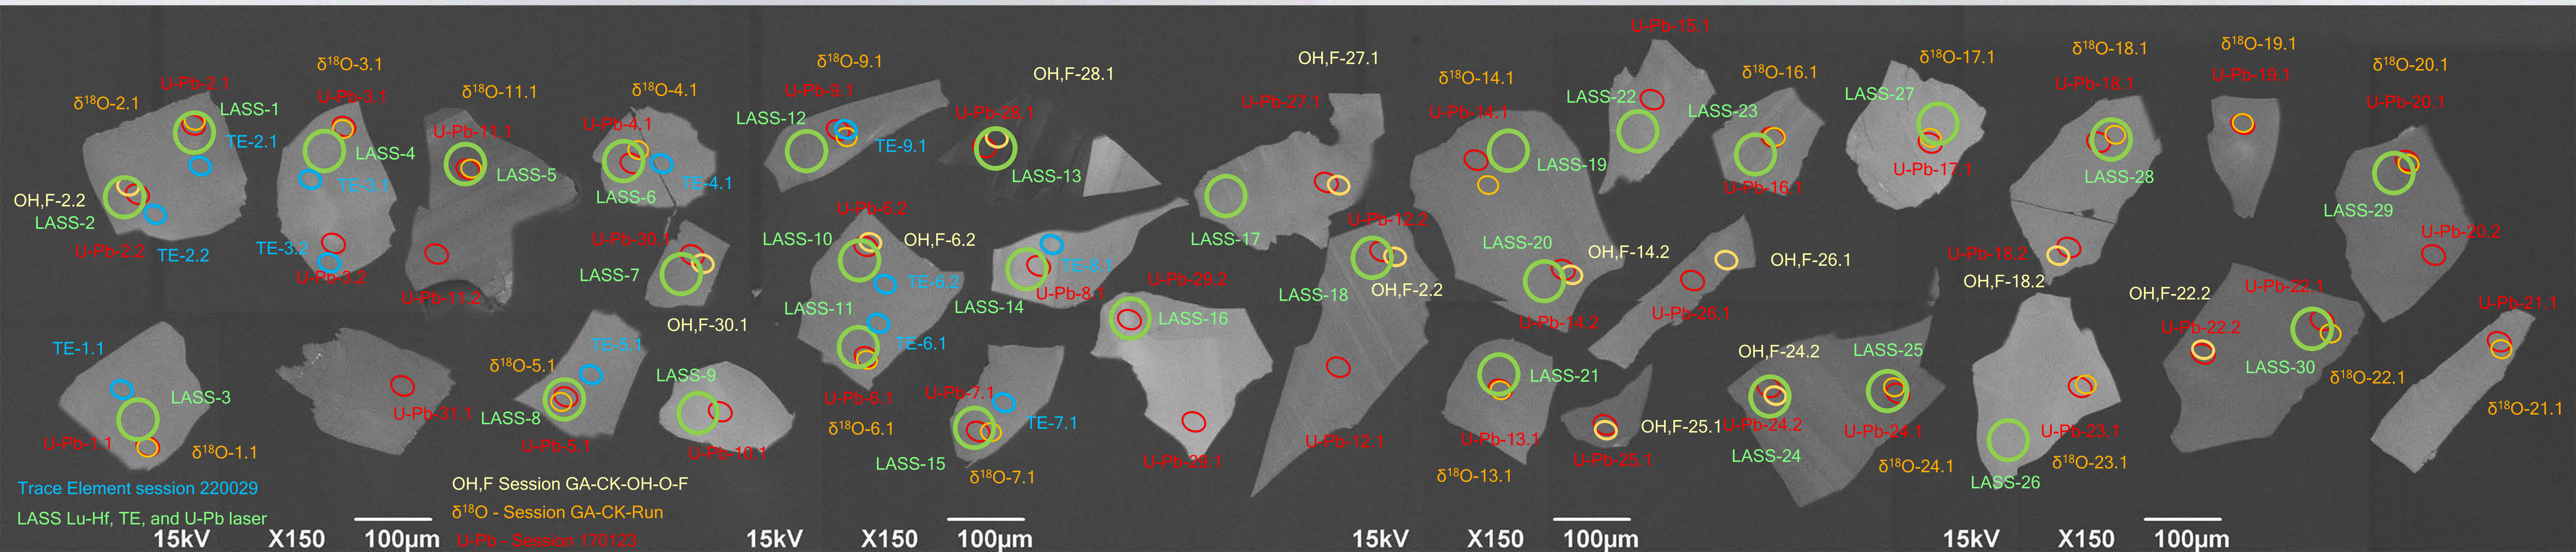



91C: Chemically abraded 91500

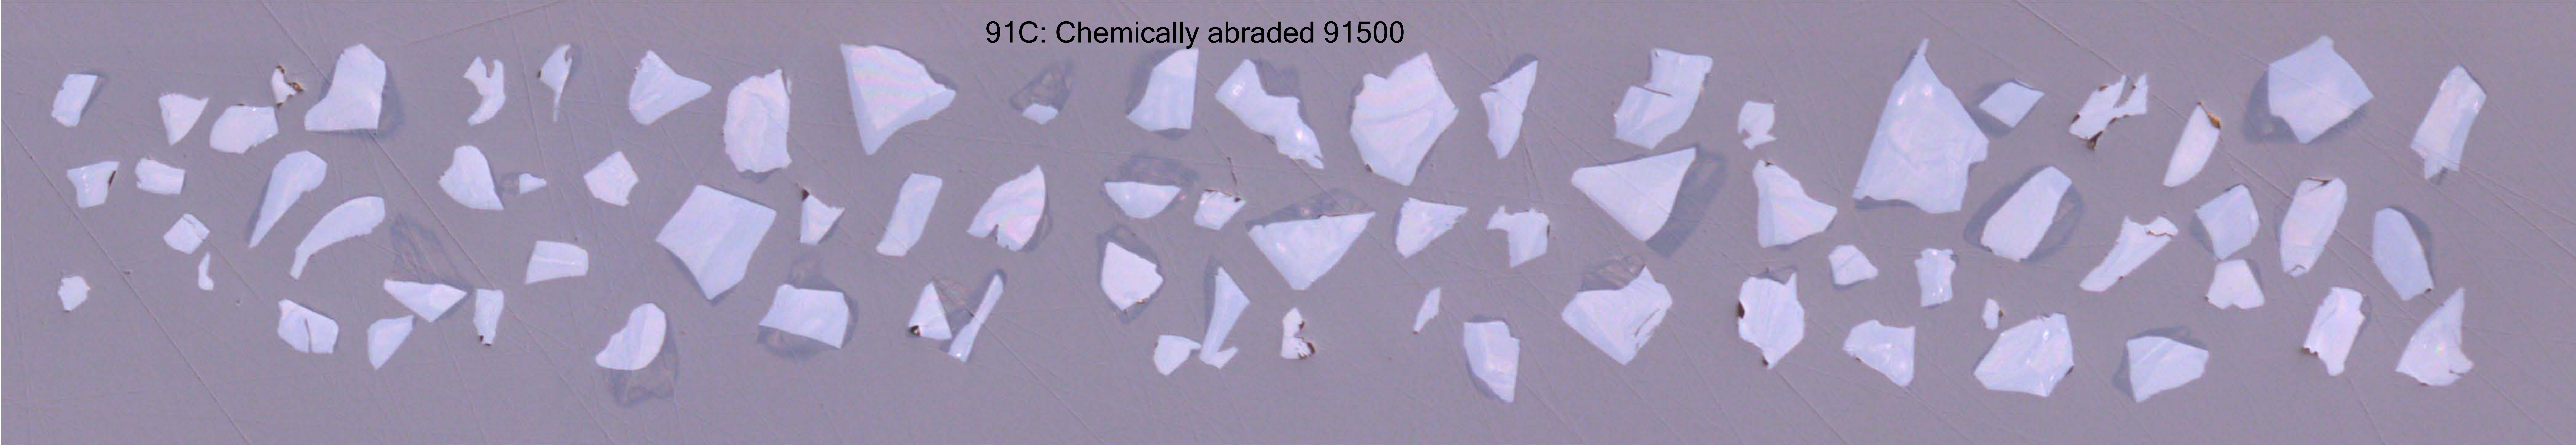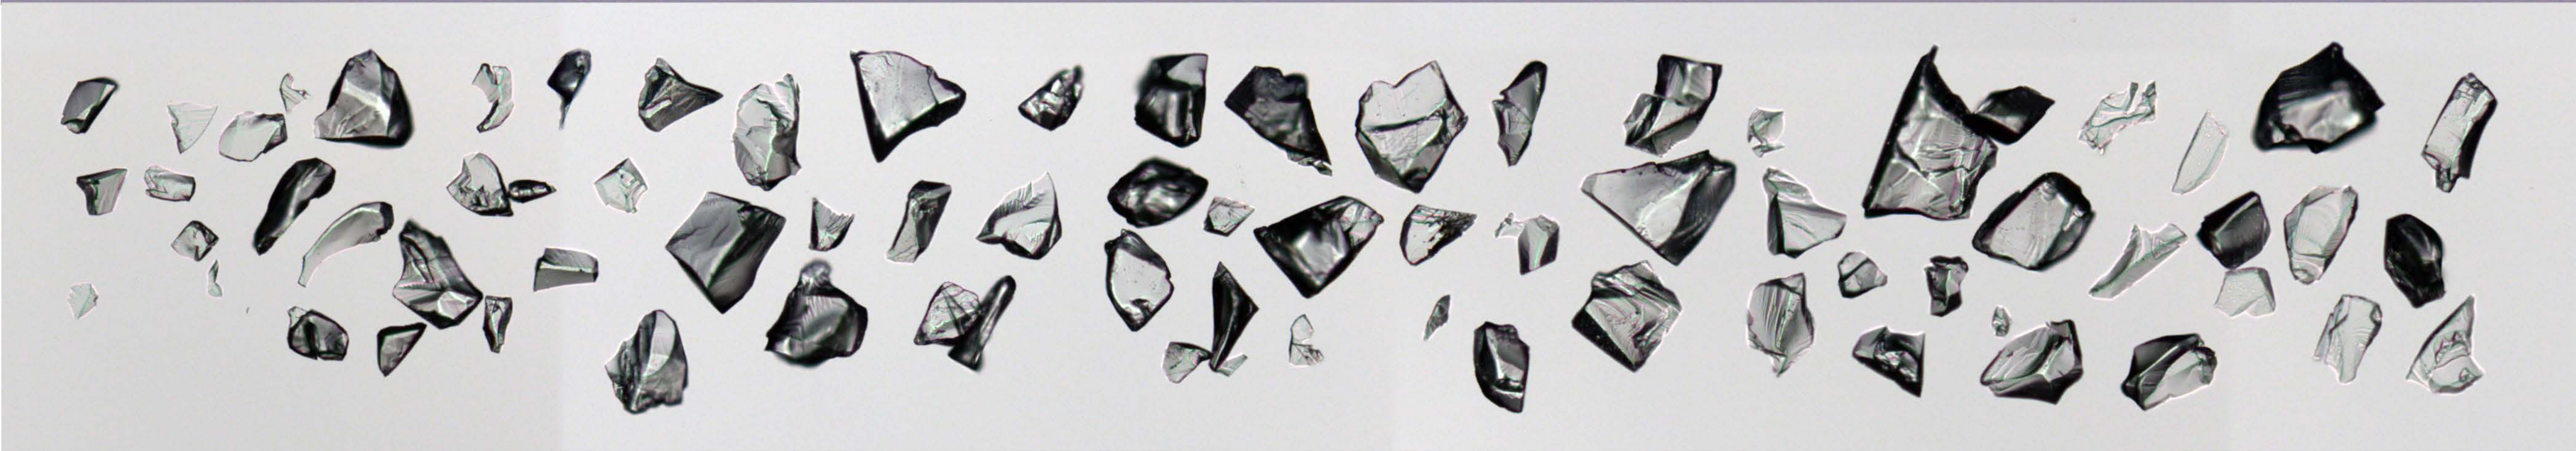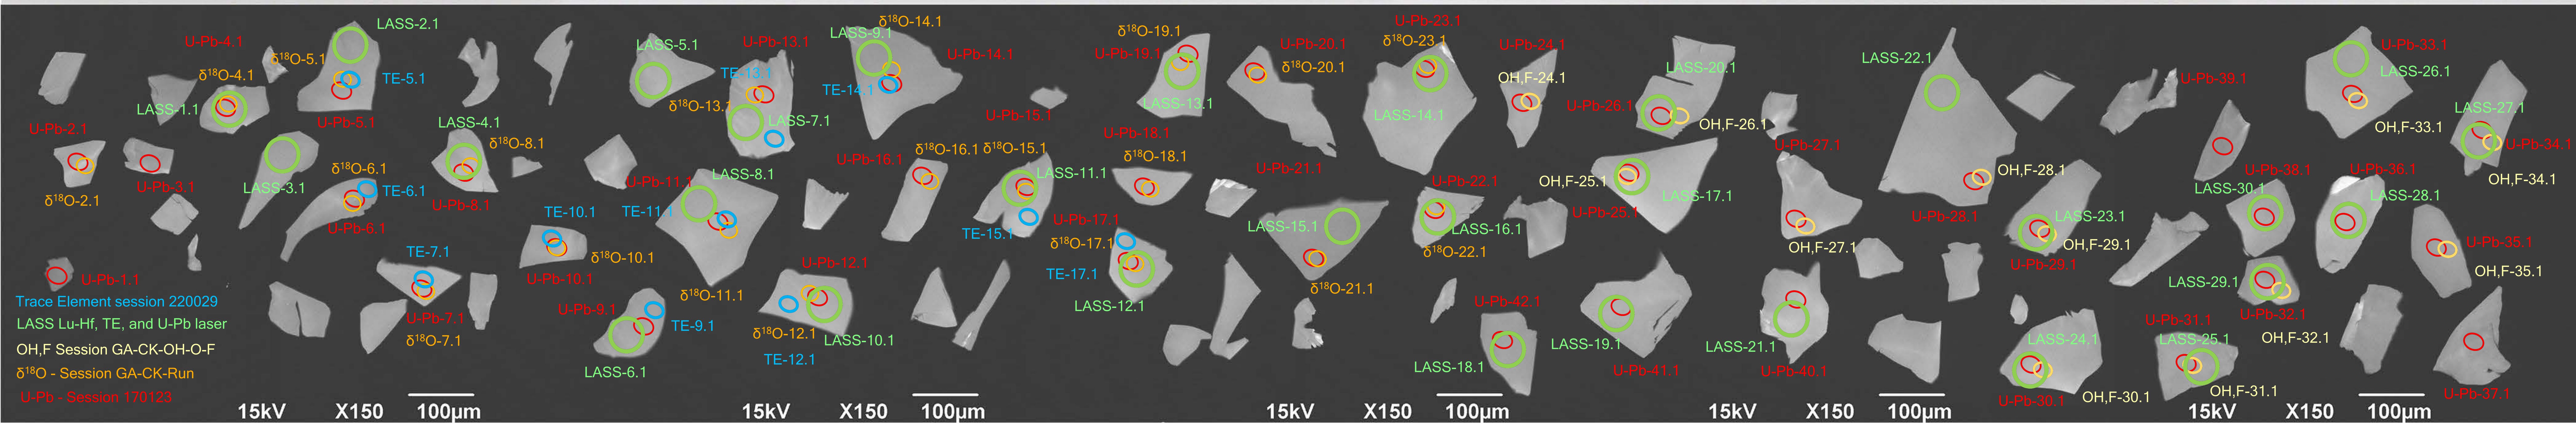



QNU: Untreated QGNG

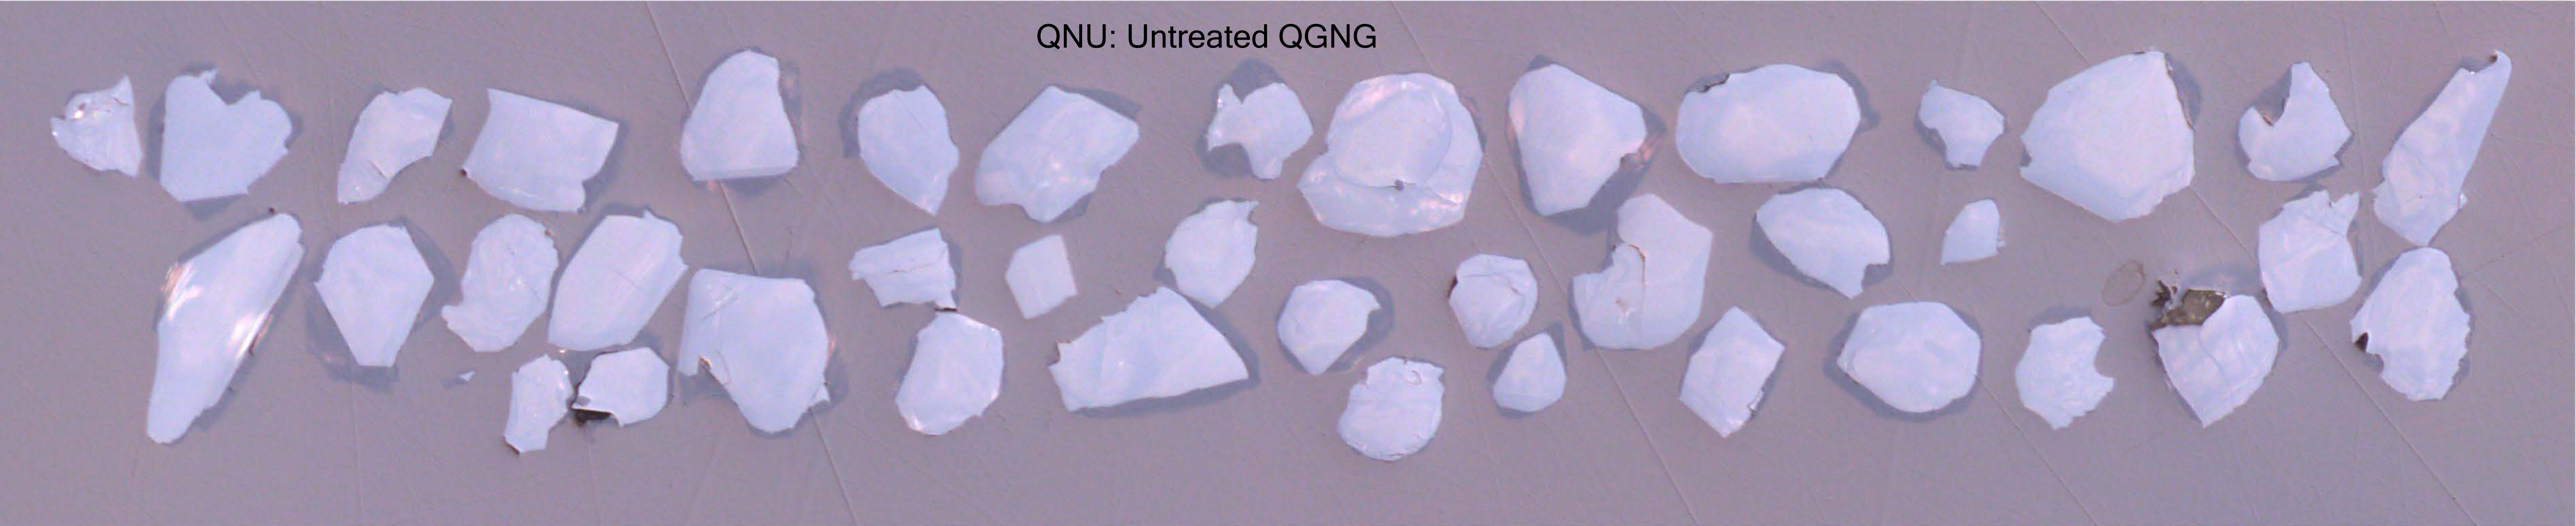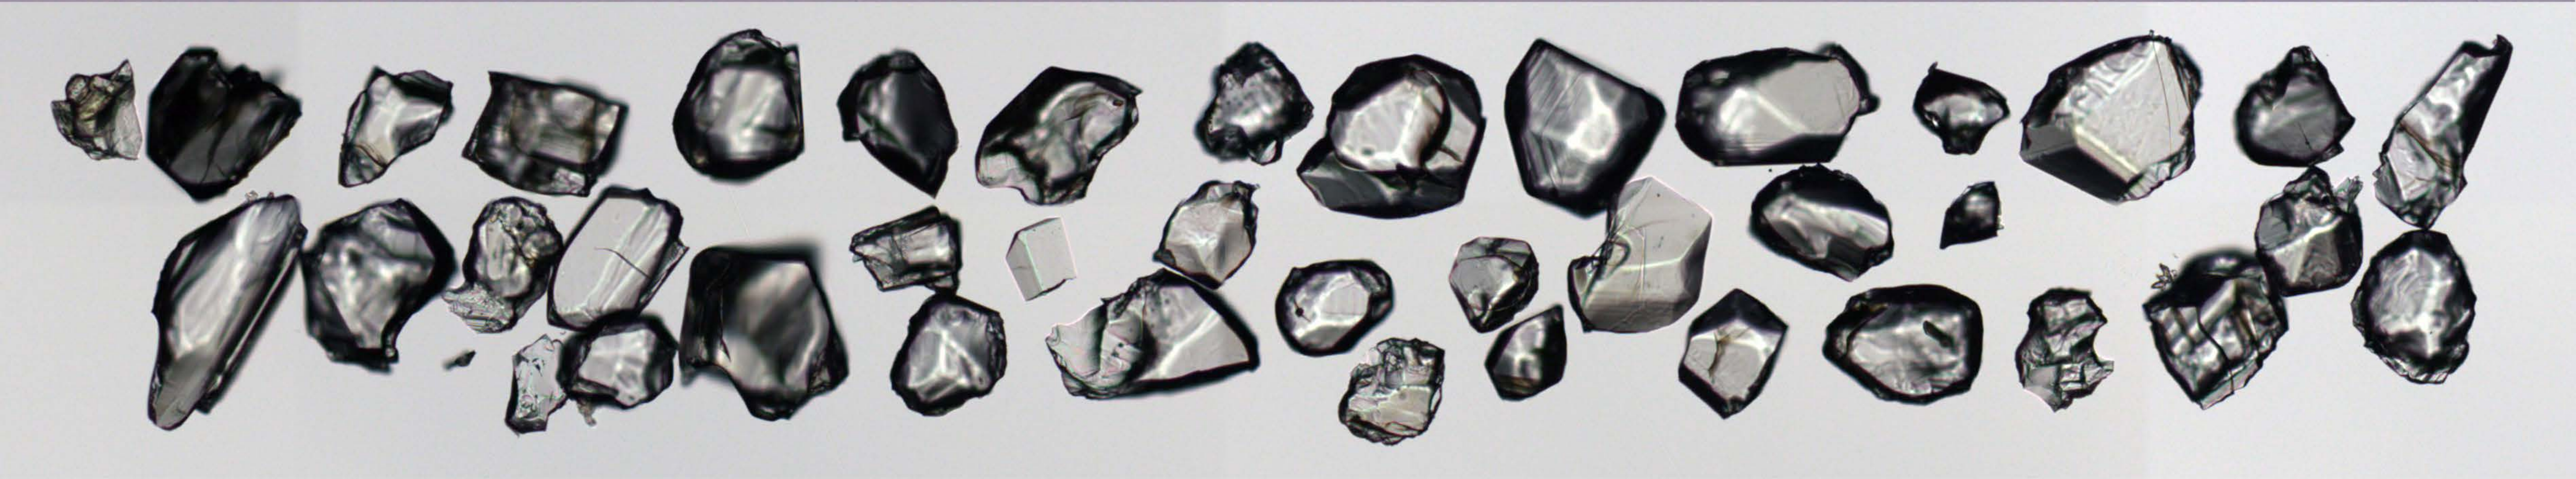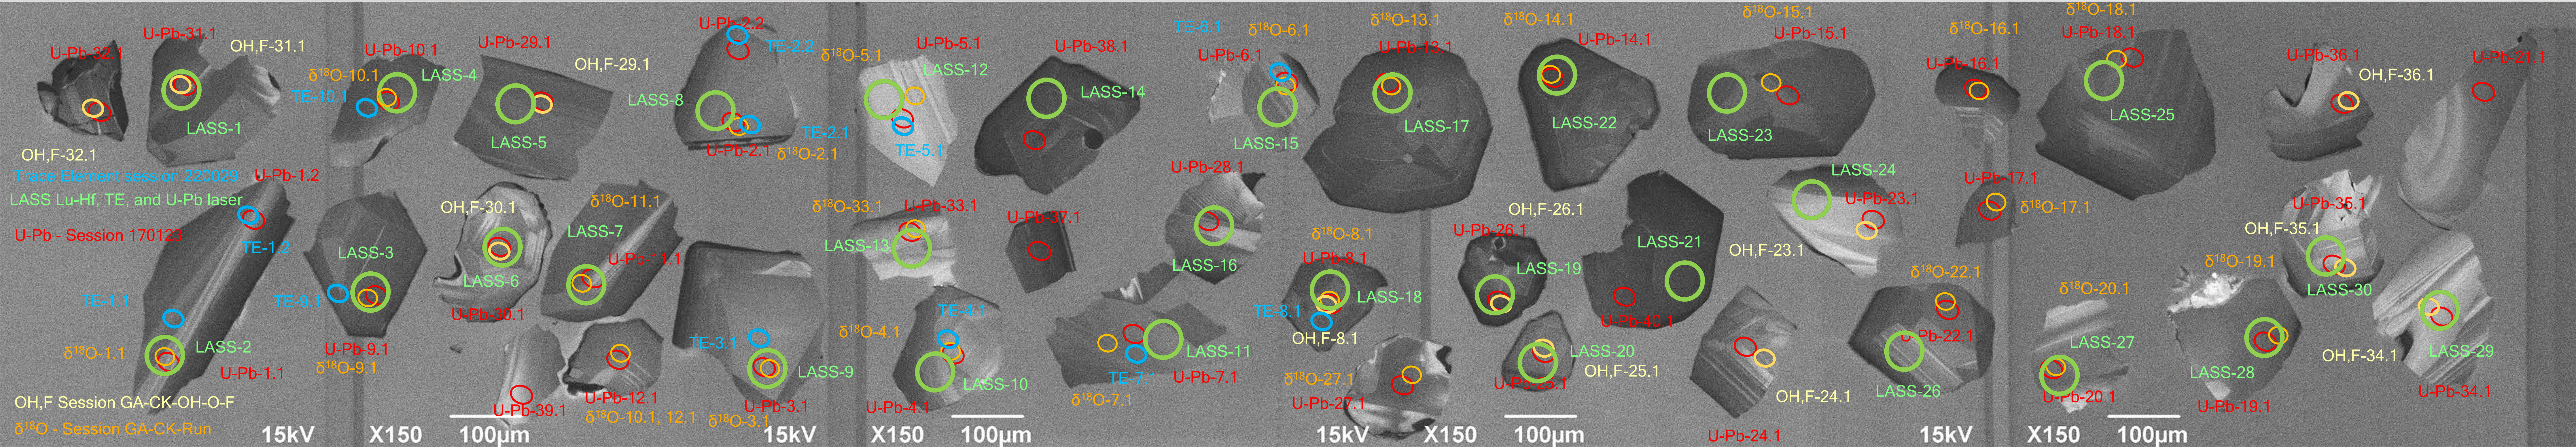



QNC: Chemically abraded QGNG

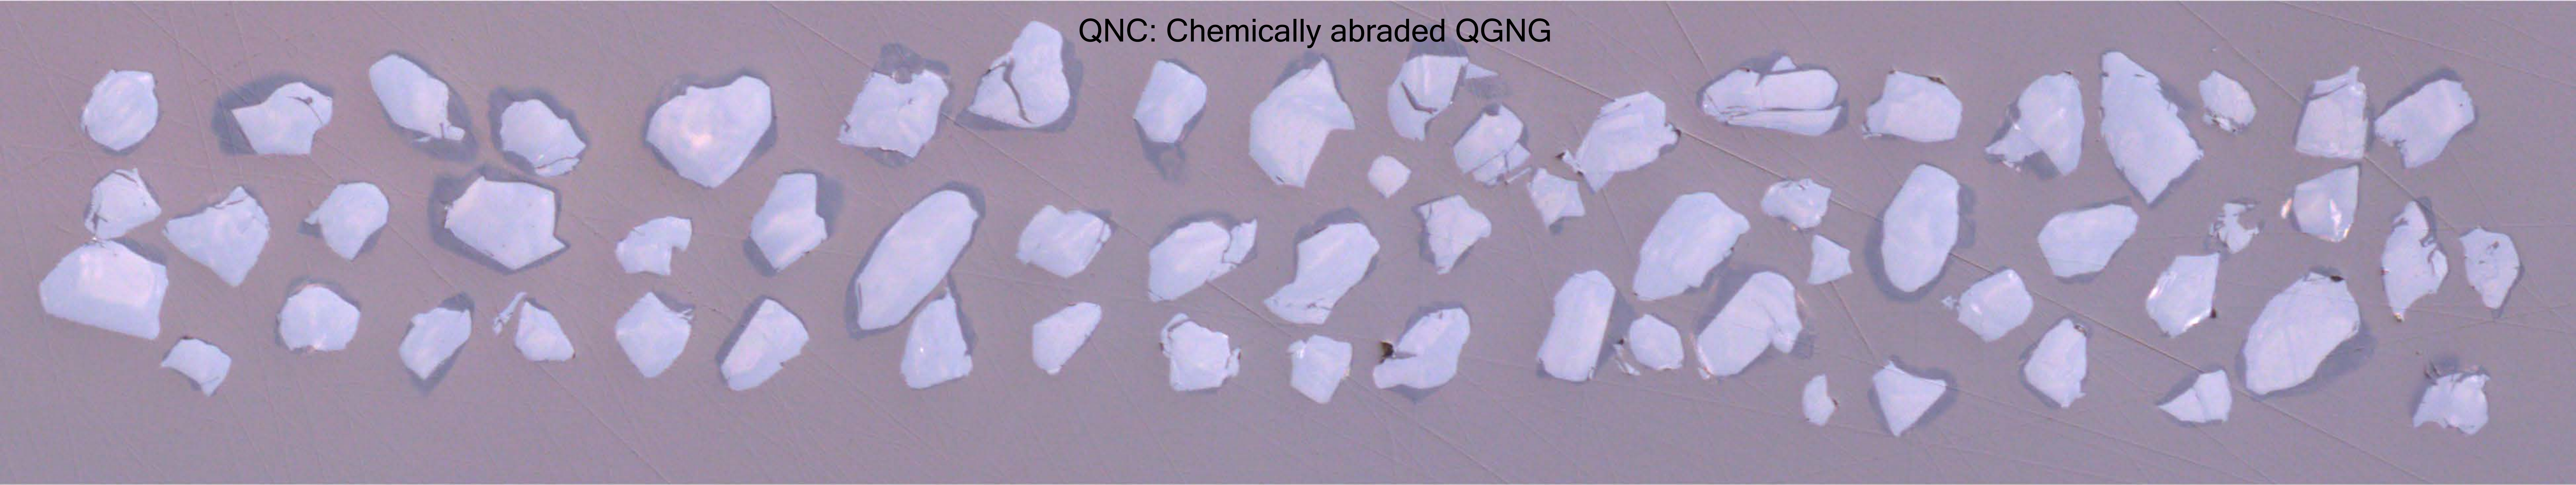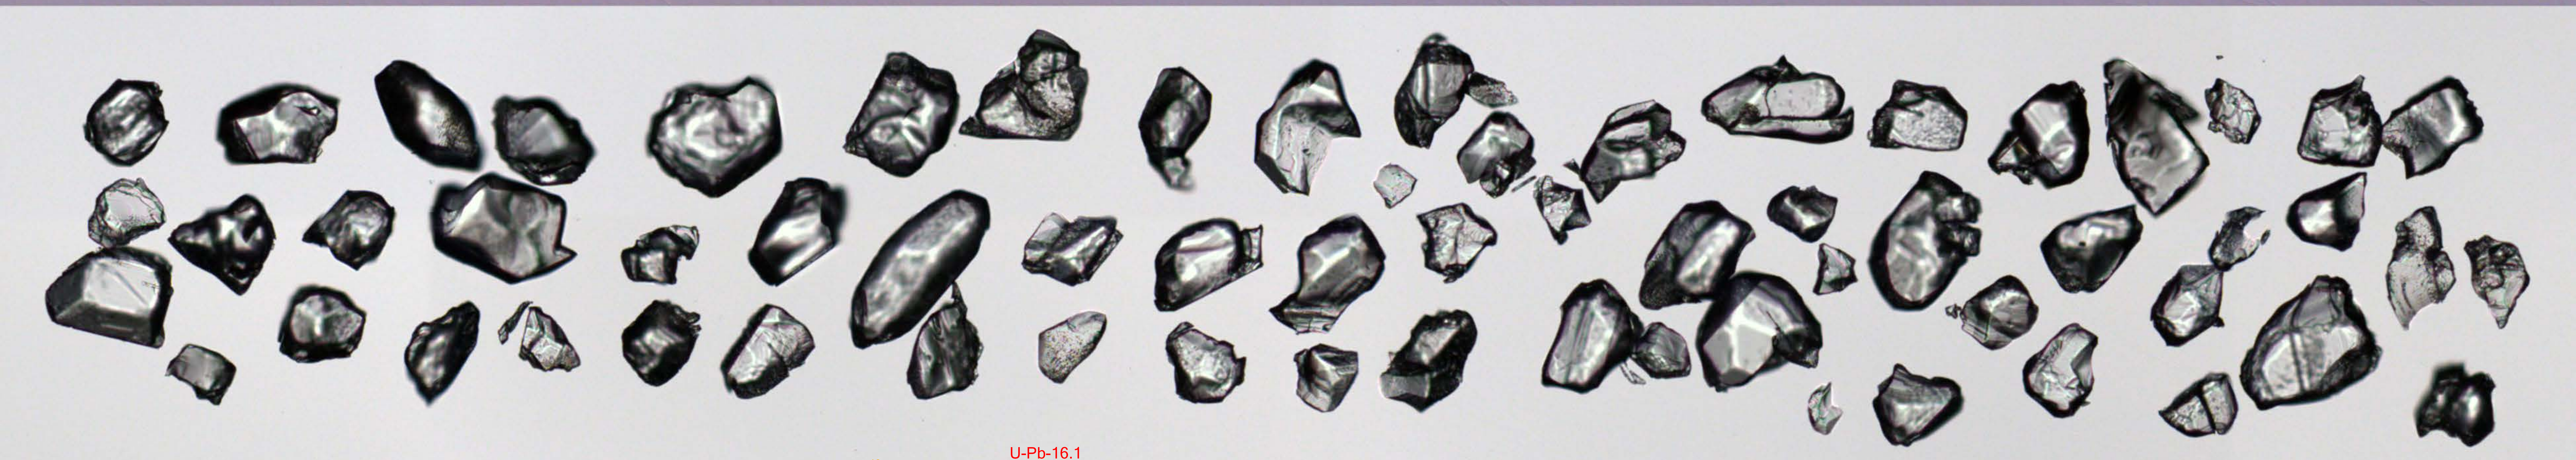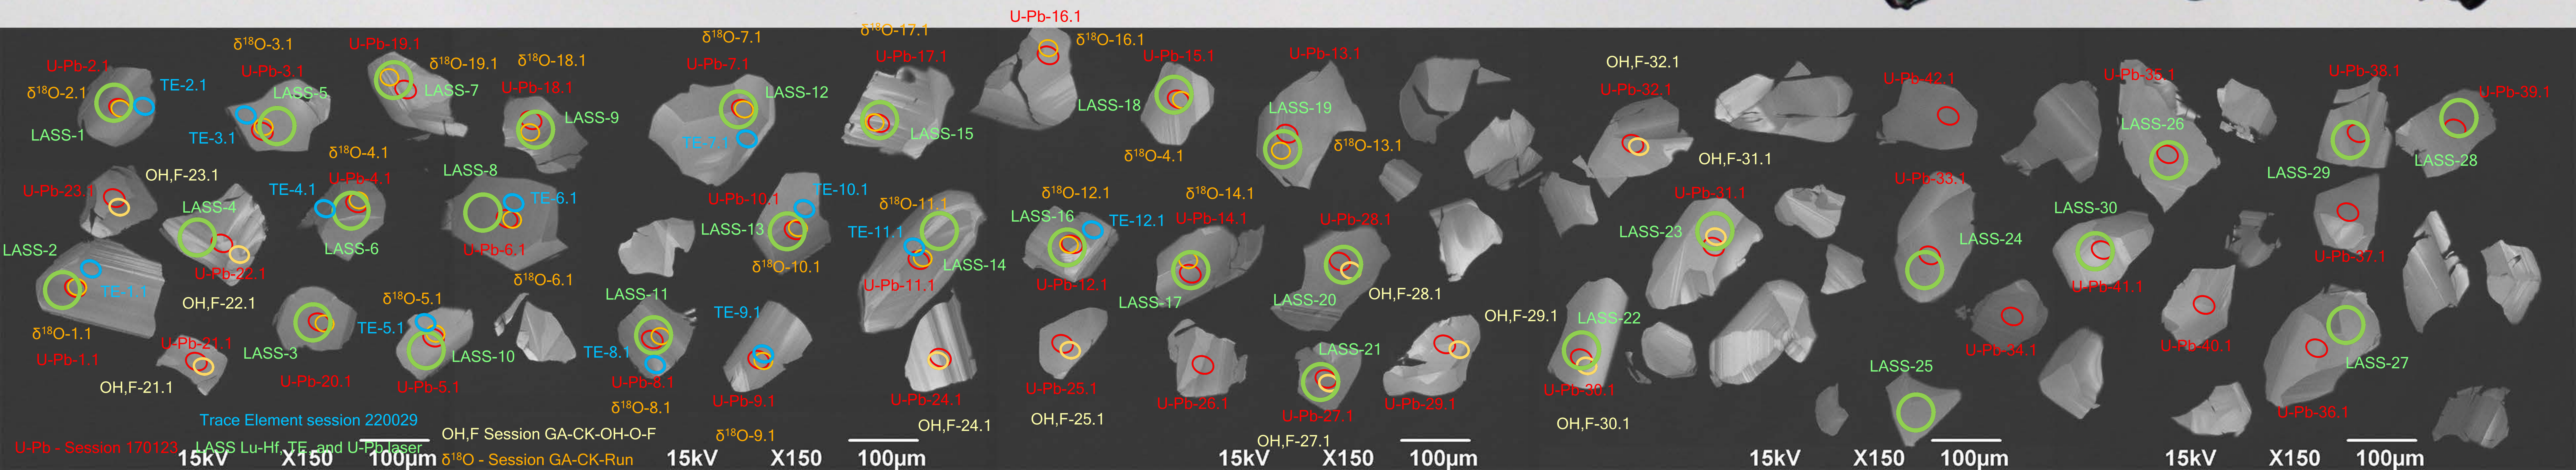



OGU: Untreated OG1

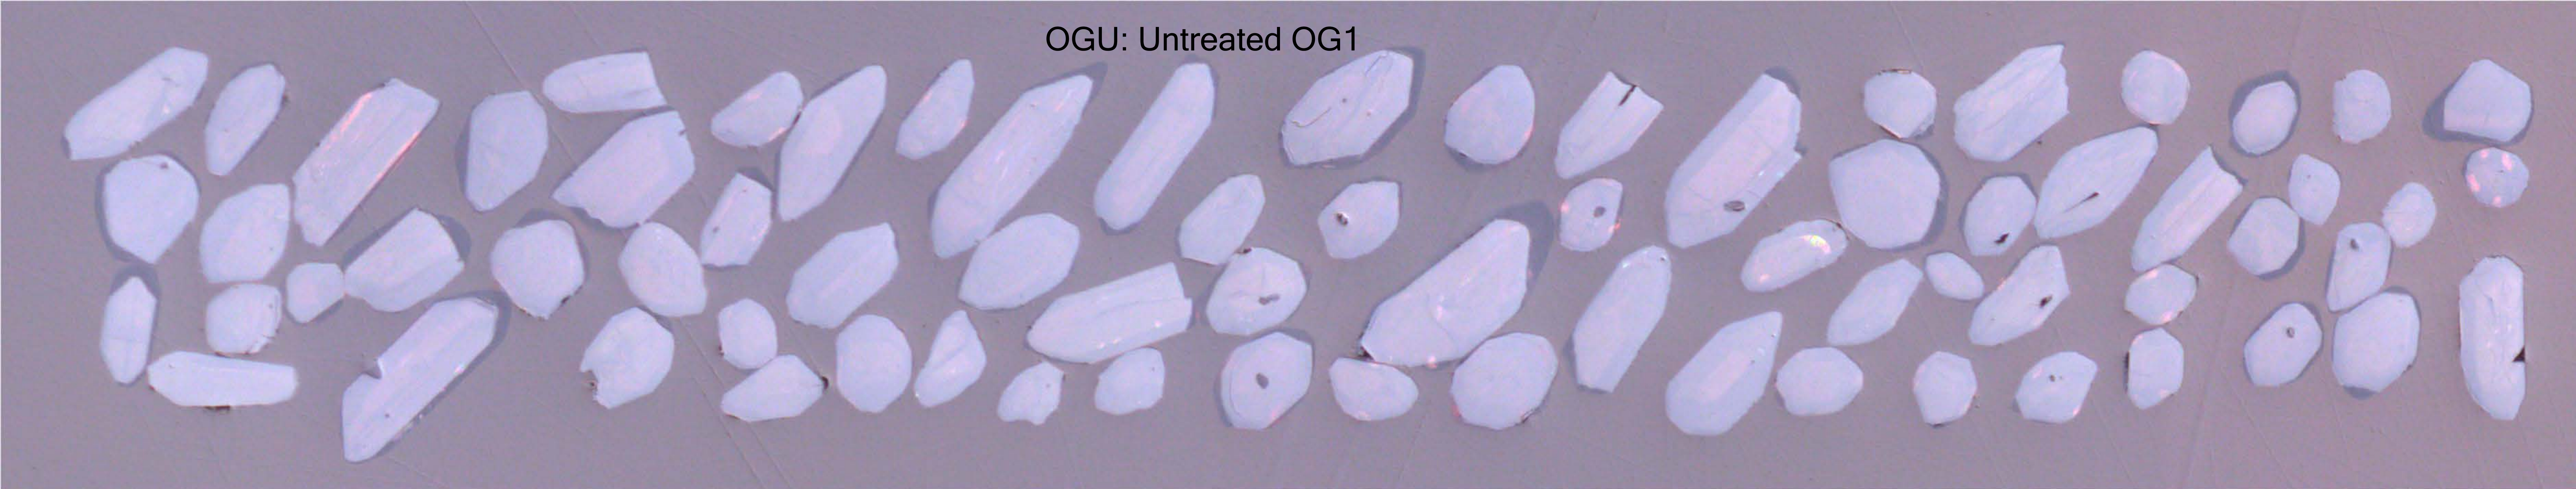

This micrograph shows a large number of untreated OG1 particles. The particles are predominantly white and elongated, with some showing internal structure or surface texture. They are distributed across the field of view, with a higher density in the center and fewer towards the edges. The background is a uniform light gray.

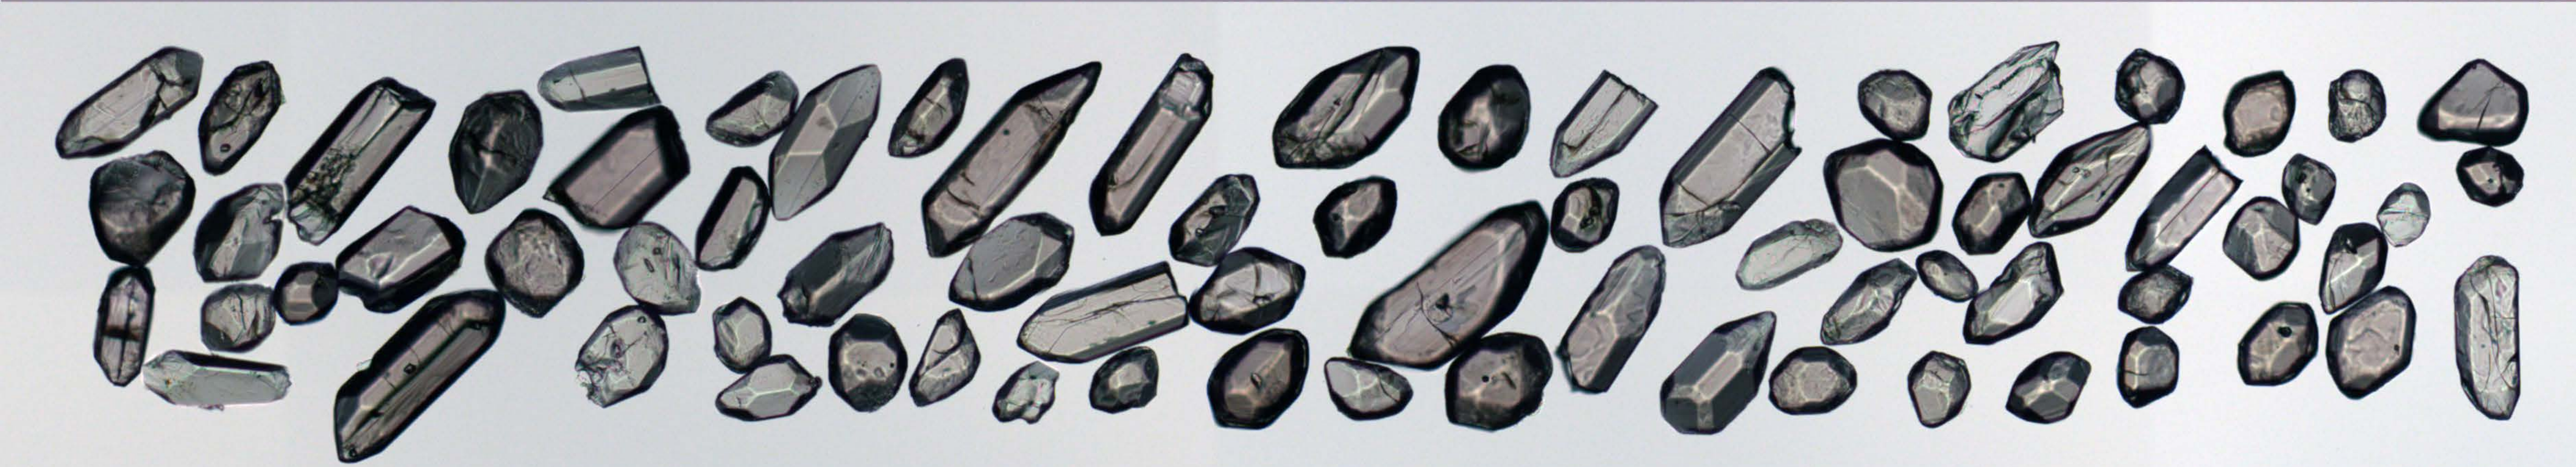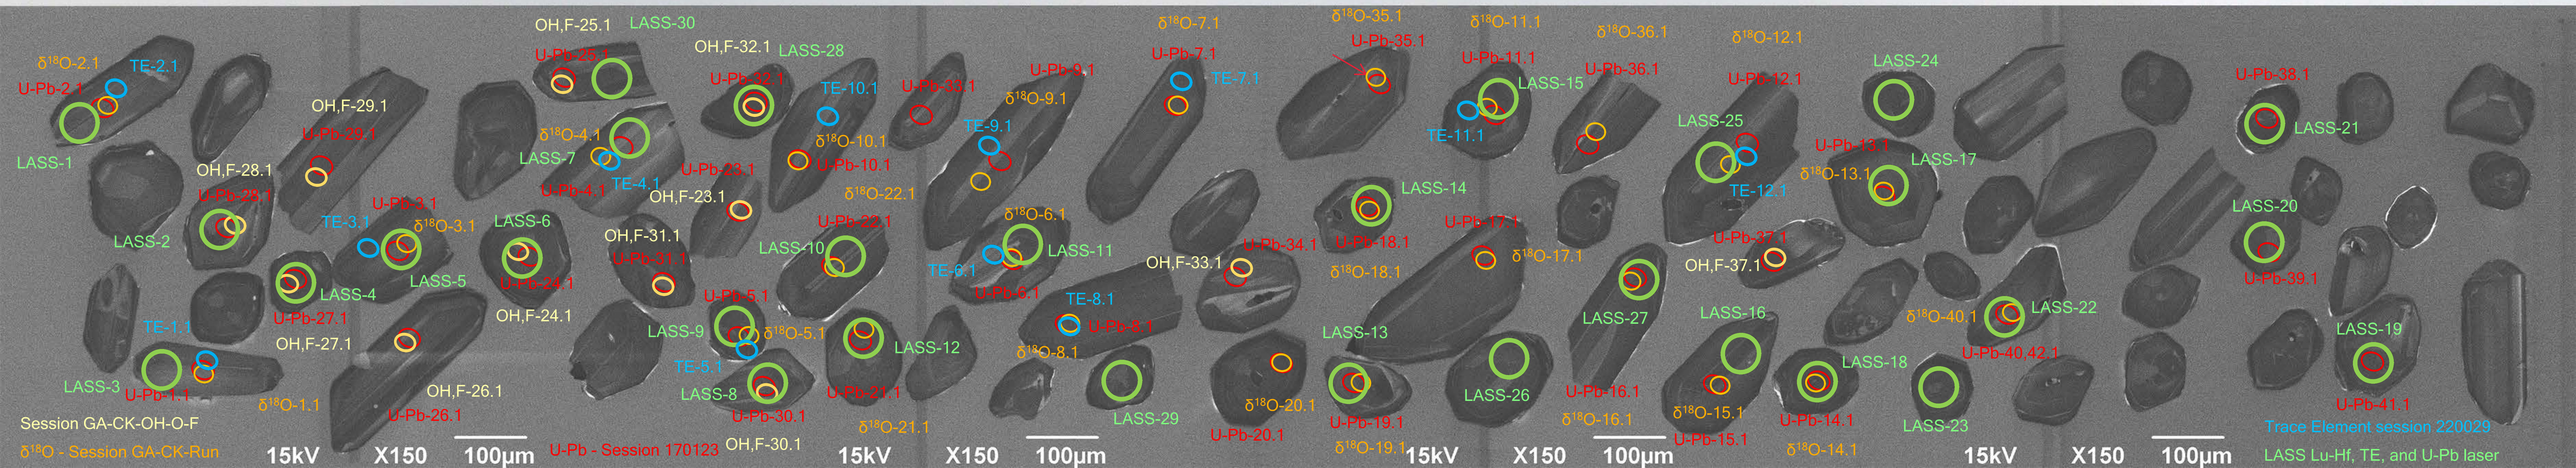



OGC: Chemically Abraded OG1

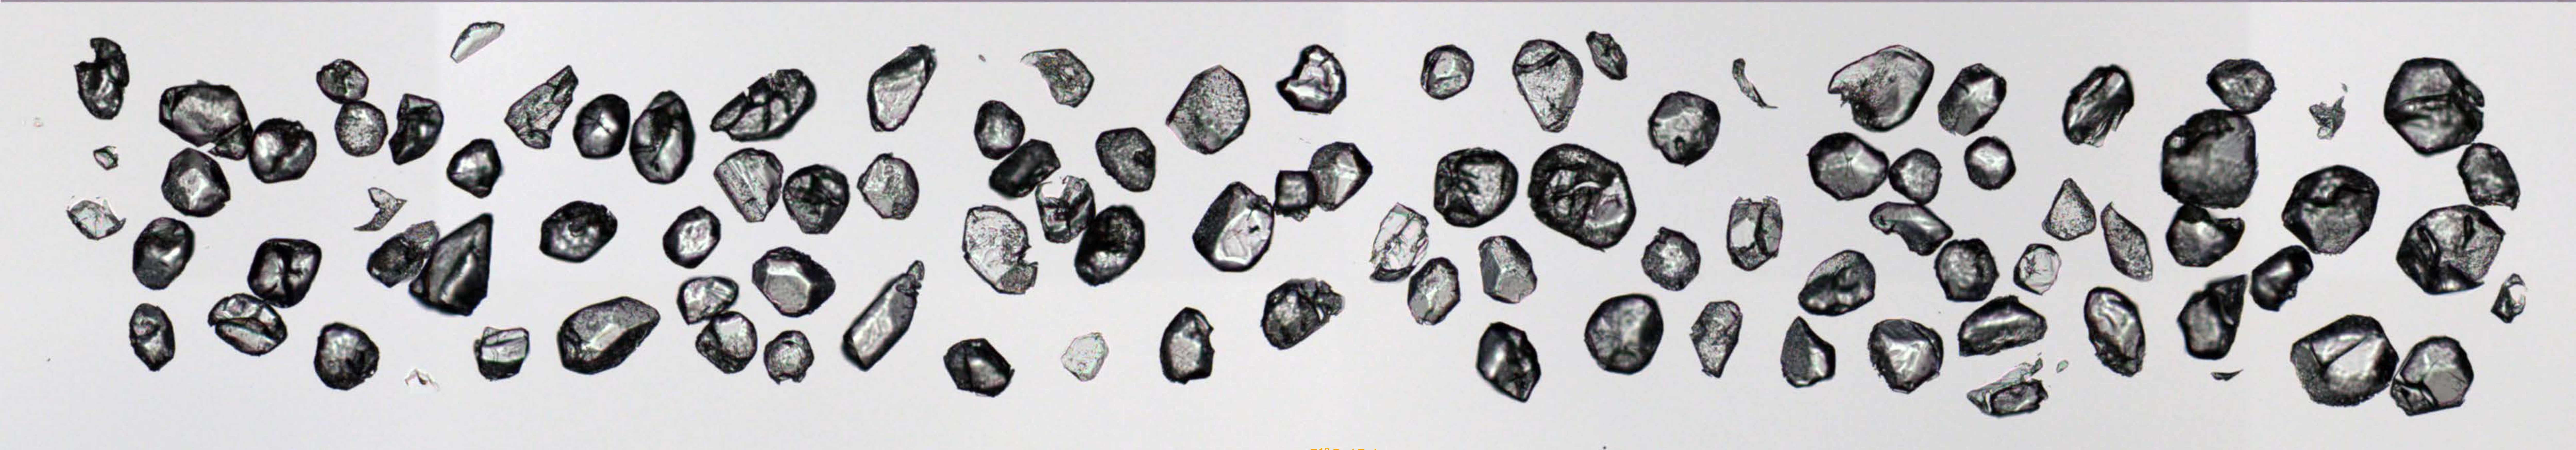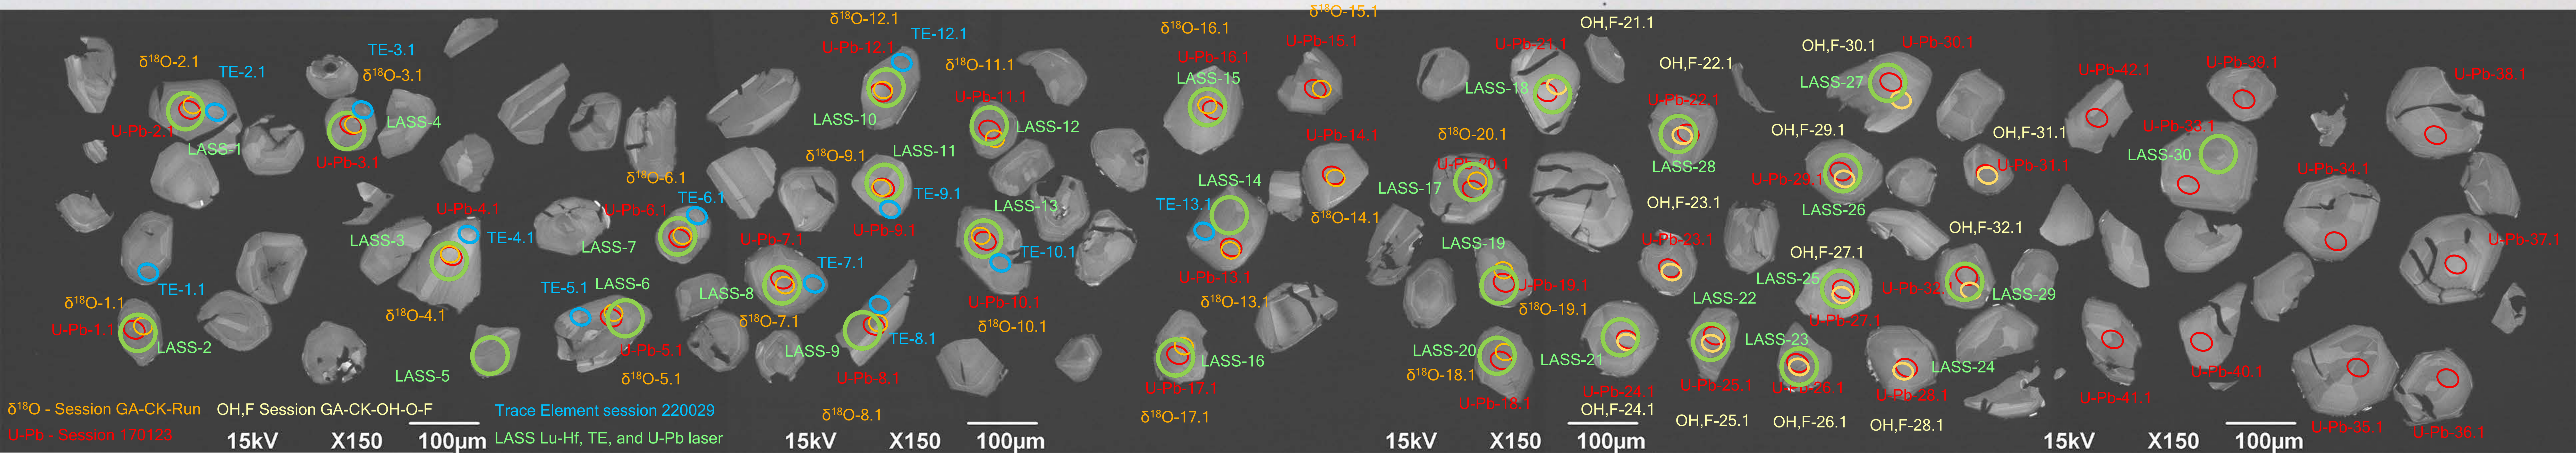

Supplement: Supplementary file 3 [file gchron-6-337-2024-supplement.zip]
