# Supplementary material for: Effect of chemical abrasion of zircon on SIMS U–Pb, δ 18 O, trace element, and LA-ICPMS trace element and Lu–Hf isotopic analyses
Source: Copernicus journal article supplement (doi:10.5194/gchron-6-337-2024), 2024-07-10
Supplement: Supplementary file 1 [file Table S1-TIMS-gravimetric-and-OG1.xlsx]

## Sheet: ROM gravi
Summary sheet: JSGL spike cal for Goldschmidt 2005 conference to Dan Condon
	Mixture	205 spk (nmol/g)	235 spk (nmol/g)	U/Pb	1 sig
accepted value				106.54	0.1	Average	st. dev.	2 s mean	2 s mean %
JMM	SK18P41	0.0172992	1.84354	106.568	0.112
	SK18P42	0.0168709	1.79799	106.573	0.204215
	SK18P43	0.0169758	1.80905	106.566	0.104536	106.569	0.00377591	0.00436005	0.004
NIGL	SK18P44	0.0483372	5.14644	106.469	0.133382
	SK18P45	0.0485387	5.17295	106.574	0.13202
	SK18P46	0.0486259	5.18661	106.663	0.133864	106.569	0.0971041	0.112126	0.0178
MIT	SK18P48	0.0029172	0.310912	106.579	0.22232	106.579
			Mean	106.57
			1 st. dev	0.0562317
			2 s mean	0.0425072
			2 s mean %	0.03988
				Ludwig
				106.569	Wtd Mean (from internal errs)
				0.095668	2-sigma% err. of mean (%)
				0.176625	MSWD
				0	rejected
				0.983246	Probability of fit

## Sheet: Full OGC TIMS data
No.	Sample	Fraction	Weight	U	Th/U	Pbtot	PbCom	206Pb/204Pb	207Pb/235U	2 Sig	206Pb/238U	2 Sig	Rho	207Pb/206Pb	2 Sig	206Pb/238U	2 Sig	207Pb/235U	2 Sig	207Pb/206Pb	2 Sig	% Disc
			(mg)	(ppm)		(pg)	(pg)	measured					Concordia			Age (Ma)		Age (Ma)		Age (Ma)
sk28p13	OG1	2009-10-01			0.756505	951.061	0.698095	67738.5	29.3246	0.0709907	0.71017	0.00145197	0.951124	0.299481	0.000236764	3459.1	5.47371	3464.45	2.37711	3467.54	1.22457	0.314589	Note these results are portrayed (in combination with the Stern et al. 2009 data) by Bodorkos et al. 2009, but tabular data unpublished (because it was a poster)
sk28p14	OG1	2009-10-01			0.664519	1178.18	0.286873	207548	29.1627	0.0710667	0.70639	0.00145554	0.953551	0.299421	0.000233414	3444.83	5.49925	3459.01	2.39239	3467.23	1.20751	0.833645	Note these results are portrayed (in combination with the Stern et al. 2009 data) by Bodorkos et al. 2009, but tabular data unpublished (because it was a poster)
sk28p15	OG1	2009-10-01			0.888629	1051.17	1.28689	39696.3	29.3345	0.067516	0.710531	0.00134387	0.951121	0.299429	0.00023066	3460.46	5.06509	3464.78	2.25997	3467.27	1.19322	0.253895	Note these results are portrayed (in combination with the Stern et al. 2009 data) by Bodorkos et al. 2009, but tabular data unpublished (because it was a poster)
sk28p16	OG1	2009-10-01			0.773125	1177.38	0.459597	127002	29.3153	0.0675593	0.710434	0.00134618	0.952525	0.299274	0.000228323	3460.09	5.07412	3464.13	2.26285	3466.47	1.18181	0.237689	Note these results are portrayed (in combination with the Stern et al. 2009 data) by Bodorkos et al. 2009, but tabular data unpublished (because it was a poster)
sk21p61	1 grain	2007	15	46.1005	0.678431	625.813	0.487024	64785	29.3732	0.0996187	0.711357	0.00222569	0.975405	0.299476	0.000230138	3463.57	8.38548	3466.07	3.33132	3467.51	1.19031	0.14695	Note these are Stern et al. (2009) but unrounded, and thus superior (hopefully)
sk21p63	1 grain	2007	6.3	47.9009	0.899151	283.561	1.07629	12793	29.3317	0.0966612	0.710529	0.00218831	0.955102	0.299402	0.000292998	3460.45	8.24762	3464.68	3.23604	3467.13	1.51587	0.248988	Note these are Stern et al. (2009) but unrounded, and thus superior (hopefully)
sk21p64	1 grain	2007	2.3	71.0521	0.759174	150.083	0.779678	9582.4	29.3805	0.0806456	0.711606	0.00171275	0.959631	0.299446	0.000240901	3464.51	6.45079	3466.32	2.69509	3467.36	1.24613	0.10627	Note these are Stern et al. (2009) but unrounded, and thus superior (hopefully)
sk21p62	1 grain	2007	4.1	98.9729	0.919129	383.013	1.79586	10325.3	29.3482	0.0857726	0.711358	0.00185252	0.965384	0.299221	0.000237094	3463.58	6.97917	3465.23	2.87025	3466.19	1.22746	0.0976208	Note these are Stern et al. (2009) but unrounded, and thus superior (hopefully)
