# Supplementary material for: Effect of chemical abrasion of zircon on SIMS U–Pb, δ 18 O, trace element, and LA-ICPMS trace element and Lu–Hf isotopic analyses
Source: Copernicus journal article supplement (doi:10.5194/gchron-6-337-2024), 2024-07-10
Supplement: Supplementary file 2 [file gchron-6-337-2024-supplement.zip]

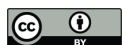

*Supplement of*

**Effect of chemical abrasion of zircon on SIMS U–Pb,  $\delta^{18}\text{O}$ , trace element, and LA-ICPMS trace element and Lu–Hf isotopic analyses**

**Cate Kooymans et al.**

*Correspondence to:* Charles W. Magee Jr. ([charles.magee@ga.gov.au](mailto:charles.magee@ga.gov.au))

- [gchron-6-337-2024-supplement-title-page.pdf](#)
- [Fig-S1-GA6363-all-spots.pdf](#)
- [Fig-S2-GA6364-all spots.pdf](#)
- [Table S1-TIMS-gravimetric-and-OG1.xlsx](#)
- [Table S10-LASS-UPb-sum.xlsx](#)
- [Table S11-LASS trace elements.xls](#)
- [Table S12-LASS-Yb-Lu-Hf-isotopes-sum.xlsx](#)
- [Table S2-master-spot-list-GA6363.xlsx](#)
- [Table S3-SH2-U-Pb-GA6363-T2Uref.xls](#)
- [Table S4-SH2-U-Pb-GA6363-T2Cref.xls](#)
- [Table S5-SH2-UPb-MtPainter.xls](#)
- [Table S6-SH2-UPb-MtPainter-redo.xls](#)
- [Table S7-SI-d18O.xls](#)
- [Table S8-SI-OH-18O-F.xlsx](#)
- [Table S9-SH2-TE-all-sum.xlsx](#)

The copyright of individual parts of the supplement might differ from the article licence.
