# Supplementary material for: Effect of chemical abrasion of zircon on SIMS U–Pb, δ 18 O, trace element, and LA-ICPMS trace element and Lu–Hf isotopic analyses
Source: Copernicus journal article supplement (doi:10.5194/gchron-6-337-2024), 2024-07-10
Supplement: Supplementary file 2 [file Table S10-LASS-UPb-sum.xlsx]

## Sheet: Metadata-day1
Mass Spectrometer Files
File	File start time	File end time	Time file loaded	No of data points	No of channels	Channels	Samples
/Users/224742i/Desktop/2019-06-10 GA UPb 7700/240 - 1.csv	2019-06-10 20:11:09.000	2019-06-10 20:12:53.893	2022-02-28 11:03:48.560	200	22	Si29,Ca43,Ti49,Zr91,La139,Ce140,Pr141,Nd146,Sm147,Eu153,Gd157,Dy163,Er166,Yb172,Lu175,Hf178,Pb204,Pb206,Pb207,Pb208,Th232,U238	240 - 1.d
/Users/224742i/Desktop/2019-06-10 GA UPb 7700/NOG1 - 27.csv	2019-06-11 01:40:36.000	2019-06-11 01:42:20.893	2022-02-28 11:03:59.585	200	22	Si29,Ca43,Ti49,Zr91,La139,Ce140,Pr141,Nd146,Sm147,Eu153,Gd157,Dy163,Er166,Yb172,Lu175,Hf178,Pb204,Pb206,Pb207,Pb208,Th232,U238	NOG1 - 27.d
/Users/224742i/Desktop/2019-06-10 GA UPb 7700/91500 - 4.csv	2019-06-10 17:20:00.000	2019-06-10 17:21:44.893	2022-02-28 11:04:00.347	200	22	Si29,Ca43,Ti49,Zr91,La139,Ce140,Pr141,Nd146,Sm147,Eu153,Gd157,Dy163,Er166,Yb172,Lu175,Hf178,Pb204,Pb206,Pb207,Pb208,Th232,U238	91500 - 4.d
/Users/224742i/Desktop/2019-06-10 GA UPb 7700/NTEM - 21.csv	2019-06-10 22:25:55.000	2019-06-10 22:27:39.893	2022-02-28 11:04:00.392	200	22	Si29,Ca43,Ti49,Zr91,La139,Ce140,Pr141,Nd146,Sm147,Eu153,Gd157,Dy163,Er166,Yb172,Lu175,Hf178,Pb204,Pb206,Pb207,Pb208,Th232,U238	NTEM - 21.d
/Users/224742i/Desktop/2019-06-10 GA UPb 7700/gj1 - 8.csv	2019-06-10 21:15:07.000	2019-06-10 21:16:51.893	2022-02-28 11:04:00.397	200	22	Si29,Ca43,Ti49,Zr91,La139,Ce140,Pr141,Nd146,Sm147,Eu153,Gd157,Dy163,Er166,Yb172,Lu175,Hf178,Pb204,Pb206,Pb207,Pb208,Th232,U238	gj1 - 8.d
/Users/224742i/Desktop/2019-06-10 GA UPb 7700/610 - 7.csv	2019-06-11 01:06:02.000	2019-06-11 01:07:46.892	2022-02-28 11:04:00.406	200	22	Si29,Ca43,Ti49,Zr91,La139,Ce140,Pr141,Nd146,Sm147,Eu153,Gd157,Dy163,Er166,Yb172,Lu175,Hf178,Pb204,Pb206,Pb207,Pb208,Th232,U238	610 - 7.d
/Users/224742i/Desktop/2019-06-10 GA UPb 7700/506 - 28.csv	2019-06-10 15:48:08.000	2019-06-10 15:49:52.893	2022-02-28 11:04:00.412	200	22	Si29,Ca43,Ti49,Zr91,La139,Ce140,Pr141,Nd146,Sm147,Eu153,Gd157,Dy163,Er166,Yb172,Lu175,Hf178,Pb204,Pb206,Pb207,Pb208,Th232,U238	506 - 28.d
/Users/224742i/Desktop/2019-06-10 GA UPb 7700/506 - 14.csv	2019-06-10 15:09:41.000	2019-06-10 15:11:25.893	2022-02-28 11:04:00.422	200	22	Si29,Ca43,Ti49,Zr91,La139,Ce140,Pr141,Nd146,Sm147,Eu153,Gd157,Dy163,Er166,Yb172,Lu175,Hf178,Pb204,Pb206,Pb207,Pb208,Th232,U238	506 - 14.d
/Users/224742i/Desktop/2019-06-10 GA UPb 7700/FC1 - 7.csv	2019-06-11 01:10:20.000	2019-06-11 01:12:04.893	2022-02-28 11:04:00.428	200	22	Si29,Ca43,Ti49,Zr91,La139,Ce140,Pr141,Nd146,Sm147,Eu153,Gd157,Dy163,Er166,Yb172,Lu175,Hf178,Pb204,Pb206,Pb207,Pb208,Th232,U238	FC1 - 7.d
/Users/224742i/Desktop/2019-06-10 GA UPb 7700/gj1 - 18.csv	2019-06-11 06:14:08.000	2019-06-11 06:15:52.893	2022-02-28 11:04:00.433	200	22	Si29,Ca43,Ti49,Zr91,La139,Ce140,Pr141,Nd146,Sm147,Eu153,Gd157,Dy163,Er166,Yb172,Lu175,Hf178,Pb204,Pb206,Pb207,Pb208,Th232,U238	gj1 - 18.d
/Users/224742i/Desktop/2019-06-10 GA UPb 7700/482 - 25.csv	2019-06-10 18:43:39.000	2019-06-10 18:45:23.893	2022-02-28 11:04:00.445	200	22	Si29,Ca43,Ti49,Zr91,La139,Ce140,Pr141,Nd146,Sm147,Eu153,Gd157,Dy163,Er166,Yb172,Lu175,Hf178,Pb204,Pb206,Pb207,Pb208,Th232,U238	482 - 25.d
/Users/224742i/Desktop/2019-06-10 GA UPb 7700/483 - 25.csv	2019-06-10 19:58:25.000	2019-06-10 20:00:09.893	2022-02-28 11:04:00.451	200	22	Si29,Ca43,Ti49,Zr91,La139,Ce140,Pr141,Nd146,Sm147,Eu153,Gd157,Dy163,Er166,Yb172,Lu175,Hf178,Pb204,Pb206,Pb207,Pb208,Th232,U238	483 - 25.d
/Users/224742i/Desktop/2019-06-10 GA UPb 7700/508 - 25.csv	2019-06-10 17:07:19.000	2019-06-10 17:09:03.893	2022-02-28 11:03:59.603	200	22	Si29,Ca43,Ti49,Zr91,La139,Ce140,Pr141,Nd146,Sm147,Eu153,Gd157,Dy163,Er166,Yb172,Lu175,Hf178,Pb204,Pb206,Pb207,Pb208,Th232,U238	508 - 25.d
/Users/224742i/Desktop/2019-06-10 GA UPb 7700/482 - 19.csv	2019-06-10 18:19:58.000	2019-06-10 18:21:42.893	2022-02-28 11:04:00.472	200	22	Si29,Ca43,Ti49,Zr91,La139,Ce140,Pr141,Nd146,Sm147,Eu153,Gd157,Dy163,Er166,Yb172,Lu175,Hf178,Pb204,Pb206,Pb207,Pb208,Th232,U238	482 - 19.d
/Users/224742i/Desktop/2019-06-10 GA UPb 7700/483 - 19.csv	2019-06-10 19:32:35.000	2019-06-10 19:34:19.893	2022-02-28 11:04:00.483	200	22	Si29,Ca43,Ti49,Zr91,La139,Ce140,Pr141,Nd146,Sm147,Eu153,Gd157,Dy163,Er166,Yb172,Lu175,Hf178,Pb204,Pb206,Pb207,Pb208,Th232,U238	483 - 19.d
/Users/224742i/Desktop/2019-06-10 GA UPb 7700/506 - 5.csv	2019-06-10 14:50:31.000	2019-06-10 14:52:15.893	2022-02-28 11:04:00.489	200	22	Si29,Ca43,Ti49,Zr91,La139,Ce140,Pr141,Nd146,Sm147,Eu153,Gd157,Dy163,Er166,Yb172,Lu175,Hf178,Pb204,Pb206,Pb207,Pb208,Th232,U238	506 - 5.d
/Users/224742i/Desktop/2019-06-10 GA UPb 7700/240 - 6.csv	2019-06-10 20:30:31.000	2019-06-10 20:32:15.893	2022-02-28 11:04:00.500	200	22	Si29,Ca43,Ti49,Zr91,La139,Ce140,Pr141,Nd146,Sm147,Eu153,Gd157,Dy163,Er166,Yb172,Lu175,Hf178,Pb204,Pb206,Pb207,Pb208,Th232,U238	240 - 6.d
/Users/224742i/Desktop/2019-06-10 GA UPb 7700/240 - 21.csv	2019-06-10 21:02:18.000	2019-06-10 21:04:02.893	2022-02-28 11:04:00.506	200	22	Si29,Ca43,Ti49,Zr91,La139,Ce140,Pr141,Nd146,Sm147,Eu153,Gd157,Dy163,Er166,Yb172,Lu175,Hf178,Pb204,Pb206,Pb207,Pb208,Th232,U238	240 - 21.d
/Users/224742i/Desktop/2019-06-10 GA UPb 7700/CTEM - 12.csv	2019-06-10 23:34:38.000	2019-06-10 23:36:22.893	2022-02-28 11:04:00.511	200	22	Si29,Ca43,Ti49,Zr91,La139,Ce140,Pr141,Nd146,Sm147,Eu153,Gd157,Dy163,Er166,Yb172,Lu175,Hf178,Pb204,Pb206,Pb207,Pb208,Th232,U238	CTEM - 12.d
/Users/224742i/Desktop/2019-06-10 GA UPb 7700/483 - 7.csv	2019-06-10 18:58:26.000	2019-06-10 19:00:10.893	2022-02-28 11:04:00.524	200	22	Si29,Ca43,Ti49,Zr91,La139,Ce140,Pr141,Nd146,Sm147,Eu153,Gd157,Dy163,Er166,Yb172,Lu175,Hf178,Pb204,Pb206,Pb207,Pb208,Th232,U238	483 - 7.d
/Users/224742i/Desktop/2019-06-10 GA UPb 7700/R33 - 17.csv	2019-06-11 06:09:44.000	2019-06-11 06:11:28.893	2022-02-28 11:04:00.530	200	22	Si29,Ca43,Ti49,Zr91,La139,Ce140,Pr141,Nd146,Sm147,Eu153,Gd157,Dy163,Er166,Yb172,Lu175,Hf178,Pb204,Pb206,Pb207,Pb208,Th232,U238	R33 - 17.d
/Users/224742i/Desktop/2019-06-10 GA UPb 7700/COG1 - 10.csv	2019-06-11 02:08:12.000	2019-06-11 02:09:56.893	2022-02-28 11:04:00.541	200	22	Si29,Ca43,Ti49,Zr91,La139,Ce140,Pr141,Nd146,Sm147,Eu153,Gd157,Dy163,Er166,Yb172,Lu175,Hf178,Pb204,Pb206,Pb207,Pb208,Th232,U238	COG1 - 10.d
/Users/224742i/Desktop/2019-06-10 GA UPb 7700/COG1 - 3.csv	2019-06-11 01:53:19.000	2019-06-11 01:55:03.893	2022-02-28 11:04:00.586	200	22	Si29,Ca43,Ti49,Zr91,La139,Ce140,Pr141,Nd146,Sm147,Eu153,Gd157,Dy163,Er166,Yb172,Lu175,Hf178,Pb204,Pb206,Pb207,Pb208,Th232,U238	COG1 - 3.d
/Users/224742i/Desktop/2019-06-10 GA UPb 7700/P1n - 1.csv	2019-06-10 14:28:53.000	2019-06-10 14:30:37.893	2022-02-28 11:03:59.607	200	22	Si29,Ca43,Ti49,Zr91,La139,Ce140,Pr141,Nd146,Sm147,Eu153,Gd157,Dy163,Er166,Yb172,Lu175,Hf178,Pb204,Pb206,Pb207,Pb208,Th232,U238	P1n - 1.d
/Users/224742i/Desktop/2019-06-10 GA UPb 7700/CQGN - 13.csv	2019-06-11 05:25:14.000	2019-06-11 05:26:58.893	2022-02-28 11:04:00.590	200	22	Si29,Ca43,Ti49,Zr91,La139,Ce140,Pr141,Nd146,Sm147,Eu153,Gd157,Dy163,Er166,Yb172,Lu175,Hf178,Pb204,Pb206,Pb207,Pb208,Th232,U238	CQGN - 13.d
/Users/224742i/Desktop/2019-06-10 GA UPb 7700/482 - 2.csv	2019-06-10 17:30:52.000	2019-06-10 17:32:36.892	2022-02-28 11:04:00.600	200	22	Si29,Ca43,Ti49,Zr91,La139,Ce140,Pr141,Nd146,Sm147,Eu153,Gd157,Dy163,Er166,Yb172,Lu175,Hf178,Pb204,Pb206,Pb207,Pb208,Th232,U238	482 - 2.d
/Users/224742i/Desktop/2019-06-10 GA UPb 7700/612 - 5.csv	2019-06-10 21:32:21.000	2019-06-10 21:34:05.893	2022-02-28 11:04:00.606	200	22	Si29,Ca43,Ti49,Zr91,La139,Ce140,Pr141,Nd146,Sm147,Eu153,Gd157,Dy163,Er166,Yb172,Lu175,Hf178,Pb204,Pb206,Pb207,Pb208,Th232,U238	612 - 5.d
/Users/224742i/Desktop/2019-06-10 GA UPb 7700/612 - 4.csv	2019-06-10 19:45:20.000	2019-06-10 19:47:04.893	2022-02-28 11:04:00.617	200	22	Si29,Ca43,Ti49,Zr91,La139,Ce140,Pr141,Nd146,Sm147,Eu153,Gd157,Dy163,Er166,Yb172,Lu175,Hf178,Pb204,Pb206,Pb207,Pb208,Th232,U238	612 - 4.d
/Users/224742i/Desktop/2019-06-10 GA UPb 7700/482 - 3.csv	2019-06-10 17:32:56.000	2019-06-10 17:34:40.893	2022-02-28 11:04:00.624	200	22	Si29,Ca43,Ti49,Zr91,La139,Ce140,Pr141,Nd146,Sm147,Eu153,Gd157,Dy163,Er166,Yb172,Lu175,Hf178,Pb204,Pb206,Pb207,Pb208,Th232,U238	482 - 3.d
/Users/224742i/Desktop/2019-06-10 GA UPb 7700/CQGN - 12.csv	2019-06-11 05:23:05.000	2019-06-11 05:24:49.893	2022-02-28 11:04:00.630	200	22	Si29,Ca43,Ti49,Zr91,La139,Ce140,Pr141,Nd146,Sm147,Eu153,Gd157,Dy163,Er166,Yb172,Lu175,Hf178,Pb204,Pb206,Pb207,Pb208,Th232,U238	CQGN - 12.d
/Users/224742i/Desktop/2019-06-10 GA UPb 7700/COG1 - 2.csv	2019-06-11 01:51:14.000	2019-06-11 01:52:58.893	2022-02-28 11:04:00.642	200	22	Si29,Ca43,Ti49,Zr91,La139,Ce140,Pr141,Nd146,Sm147,Eu153,Gd157,Dy163,Er166,Yb172,Lu175,Hf178,Pb204,Pb206,Pb207,Pb208,Th232,U238	COG1 - 2.d
/Users/224742i/Desktop/2019-06-10 GA UPb 7700/COG1 - 11.csv	2019-06-11 02:18:53.000	2019-06-11 02:20:37.893	2022-02-28 11:04:00.648	200	22	Si29,Ca43,Ti49,Zr91,La139,Ce140,Pr141,Nd146,Sm147,Eu153,Gd157,Dy163,Er166,Yb172,Lu175,Hf178,Pb204,Pb206,Pb207,Pb208,Th232,U238	COG1 - 11.d
/Users/224742i/Desktop/2019-06-10 GA UPb 7700/483 - 6.csv	2019-06-10 18:56:22.000	2019-06-10 18:58:06.893	2022-02-28 11:04:00.674	200	22	Si29,Ca43,Ti49,Zr91,La139,Ce140,Pr141,Nd146,Sm147,Eu153,Gd157,Dy163,Er166,Yb172,Lu175,Hf178,Pb204,Pb206,Pb207,Pb208,Th232,U238	483 - 6.d
/Users/224742i/Desktop/2019-06-10 GA UPb 7700/R33 - 16.csv	2019-06-11 05:18:38.000	2019-06-11 05:20:22.893	2022-02-28 11:04:00.687	200	22	Si29,Ca43,Ti49,Zr91,La139,Ce140,Pr141,Nd146,Sm147,Eu153,Gd157,Dy163,Er166,Yb172,Lu175,Hf178,Pb204,Pb206,Pb207,Pb208,Th232,U238	R33 - 16.d
/Users/224742i/Desktop/2019-06-10 GA UPb 7700/NQGN - 18.csv	2019-06-11 04:01:31.000	2019-06-11 04:03:15.893	2022-02-28 11:03:59.611	200	22	Si29,Ca43,Ti49,Zr91,La139,Ce140,Pr141,Nd146,Sm147,Eu153,Gd157,Dy163,Er166,Yb172,Lu175,Hf178,Pb204,Pb206,Pb207,Pb208,Th232,U238	NQGN - 18.d
/Users/224742i/Desktop/2019-06-10 GA UPb 7700/CTEM - 13.csv	2019-06-10 23:36:43.000	2019-06-10 23:38:27.893	2022-02-28 11:04:00.693	200	22	Si29,Ca43,Ti49,Zr91,La139,Ce140,Pr141,Nd146,Sm147,Eu153,Gd157,Dy163,Er166,Yb172,Lu175,Hf178,Pb204,Pb206,Pb207,Pb208,Th232,U238	CTEM - 13.d
/Users/224742i/Desktop/2019-06-10 GA UPb 7700/NOG1 - 1.csv	2019-06-11 00:23:29.000	2019-06-11 00:25:13.893	2022-02-28 11:04:00.705	200	22	Si29,Ca43,Ti49,Zr91,La139,Ce140,Pr141,Nd146,Sm147,Eu153,Gd157,Dy163,Er166,Yb172,Lu175,Hf178,Pb204,Pb206,Pb207,Pb208,Th232,U238	NOG1 - 1.d
/Users/224742i/Desktop/2019-06-10 GA UPb 7700/mud - 1.csv	2019-06-10 14:37:35.000	2019-06-10 14:39:19.893	2022-02-28 11:04:00.712	200	22	Si29,Ca43,Ti49,Zr91,La139,Ce140,Pr141,Nd146,Sm147,Eu153,Gd157,Dy163,Er166,Yb172,Lu175,Hf178,Pb204,Pb206,Pb207,Pb208,Th232,U238	mud - 1.d
/Users/224742i/Desktop/2019-06-10 GA UPb 7700/240 - 7.csv	2019-06-10 20:32:39.000	2019-06-10 20:34:23.893	2022-02-28 11:04:00.718	200	22	Si29,Ca43,Ti49,Zr91,La139,Ce140,Pr141,Nd146,Sm147,Eu153,Gd157,Dy163,Er166,Yb172,Lu175,Hf178,Pb204,Pb206,Pb207,Pb208,Th232,U238	240 - 7.d
/Users/224742i/Desktop/2019-06-10 GA UPb 7700/240 - 20.csv	2019-06-10 21:00:14.000	2019-06-10 21:01:58.893	2022-02-28 11:04:00.730	200	22	Si29,Ca43,Ti49,Zr91,La139,Ce140,Pr141,Nd146,Sm147,Eu153,Gd157,Dy163,Er166,Yb172,Lu175,Hf178,Pb204,Pb206,Pb207,Pb208,Th232,U238	240 - 20.d
/Users/224742i/Desktop/2019-06-10 GA UPb 7700/506 - 4.csv	2019-06-10 14:48:27.000	2019-06-10 14:50:11.893	2022-02-28 11:04:00.736	200	22	Si29,Ca43,Ti49,Zr91,La139,Ce140,Pr141,Nd146,Sm147,Eu153,Gd157,Dy163,Er166,Yb172,Lu175,Hf178,Pb204,Pb206,Pb207,Pb208,Th232,U238	506 - 4.d
/Users/224742i/Desktop/2019-06-10 GA UPb 7700/483 - 18.csv	2019-06-10 19:30:30.000	2019-06-10 19:32:14.893	2022-02-28 11:04:00.748	200	22	Si29,Ca43,Ti49,Zr91,La139,Ce140,Pr141,Nd146,Sm147,Eu153,Gd157,Dy163,Er166,Yb172,Lu175,Hf178,Pb204,Pb206,Pb207,Pb208,Th232,U238	483 - 18.d
/Users/224742i/Desktop/2019-06-10 GA UPb 7700/482 - 18.csv	2019-06-10 18:17:53.000	2019-06-10 18:19:37.893	2022-02-28 11:04:00.798	200	22	Si29,Ca43,Ti49,Zr91,La139,Ce140,Pr141,Nd146,Sm147,Eu153,Gd157,Dy163,Er166,Yb172,Lu175,Hf178,Pb204,Pb206,Pb207,Pb208,Th232,U238	482 - 18.d
/Users/224742i/Desktop/2019-06-10 GA UPb 7700/483 - 24.csv	2019-06-10 19:56:16.000	2019-06-10 19:58:00.893	2022-02-28 11:04:00.804	200	22	Si29,Ca43,Ti49,Zr91,La139,Ce140,Pr141,Nd146,Sm147,Eu153,Gd157,Dy163,Er166,Yb172,Lu175,Hf178,Pb204,Pb206,Pb207,Pb208,Th232,U238	483 - 24.d
/Users/224742i/Desktop/2019-06-10 GA UPb 7700/483 - 30.csv	2019-06-10 20:09:04.000	2019-06-10 20:10:48.893	2022-02-28 11:04:00.816	200	22	Si29,Ca43,Ti49,Zr91,La139,Ce140,Pr141,Nd146,Sm147,Eu153,Gd157,Dy163,Er166,Yb172,Lu175,Hf178,Pb204,Pb206,Pb207,Pb208,Th232,U238	483 - 30.d
/Users/224742i/Desktop/2019-06-10 GA UPb 7700/NQGN - 9.csv	2019-06-11 03:42:27.000	2019-06-11 03:44:11.893	2022-02-28 11:03:59.614	200	22	Si29,Ca43,Ti49,Zr91,La139,Ce140,Pr141,Nd146,Sm147,Eu153,Gd157,Dy163,Er166,Yb172,Lu175,Hf178,Pb204,Pb206,Pb207,Pb208,Th232,U238	NQGN - 9.d
/Users/224742i/Desktop/2019-06-10 GA UPb 7700/482 - 24.csv	2019-06-10 18:41:30.000	2019-06-10 18:43:14.893	2022-02-28 11:04:00.823	200	22	Si29,Ca43,Ti49,Zr91,La139,Ce140,Pr141,Nd146,Sm147,Eu153,Gd157,Dy163,Er166,Yb172,Lu175,Hf178,Pb204,Pb206,Pb207,Pb208,Th232,U238	482 - 24.d
/Users/224742i/Desktop/2019-06-10 GA UPb 7700/483 - 26.csv	2019-06-10 20:00:34.000	2019-06-10 20:02:18.893	2022-02-28 11:04:00.835	200	22	Si29,Ca43,Ti49,Zr91,La139,Ce140,Pr141,Nd146,Sm147,Eu153,Gd157,Dy163,Er166,Yb172,Lu175,Hf178,Pb204,Pb206,Pb207,Pb208,Th232,U238	483 - 26.d
/Users/224742i/Desktop/2019-06-10 GA UPb 7700/506 - 6.csv	2019-06-10 14:52:41.000	2019-06-10 14:54:25.893	2022-02-28 11:04:00.842	200	22	Si29,Ca43,Ti49,Zr91,La139,Ce140,Pr141,Nd146,Sm147,Eu153,Gd157,Dy163,Er166,Yb172,Lu175,Hf178,Pb204,Pb206,Pb207,Pb208,Th232,U238	506 - 6.d
/Users/224742i/Desktop/2019-06-10 GA UPb 7700/240 - 22.csv	2019-06-10 21:04:28.000	2019-06-10 21:06:12.893	2022-02-28 11:04:00.849	200	22	Si29,Ca43,Ti49,Zr91,La139,Ce140,Pr141,Nd146,Sm147,Eu153,Gd157,Dy163,Er166,Yb172,Lu175,Hf178,Pb204,Pb206,Pb207,Pb208,Th232,U238	240 - 22.d
/Users/224742i/Desktop/2019-06-10 GA UPb 7700/240 - 5.csv	2019-06-10 20:19:41.000	2019-06-10 20:21:25.893	2022-02-28 11:04:00.861	200	22	Si29,Ca43,Ti49,Zr91,La139,Ce140,Pr141,Nd146,Sm147,Eu153,Gd157,Dy163,Er166,Yb172,Lu175,Hf178,Pb204,Pb206,Pb207,Pb208,Th232,U238	240 - 5.d
/Users/224742i/Desktop/2019-06-10 GA UPb 7700/mud - 3.csv	2019-06-10 16:33:10.000	2019-06-10 16:34:54.893	2022-02-28 11:04:00.868	200	22	Si29,Ca43,Ti49,Zr91,La139,Ce140,Pr141,Nd146,Sm147,Eu153,Gd157,Dy163,Er166,Yb172,Lu175,Hf178,Pb204,Pb206,Pb207,Pb208,Th232,U238	mud - 3.d
/Users/224742i/Desktop/2019-06-10 GA UPb 7700/NOG1 - 3.csv	2019-06-11 00:27:52.000	2019-06-11 00:29:36.893	2022-02-28 11:04:00.897	200	22	Si29,Ca43,Ti49,Zr91,La139,Ce140,Pr141,Nd146,Sm147,Eu153,Gd157,Dy163,Er166,Yb172,Lu175,Hf178,Pb204,Pb206,Pb207,Pb208,Th232,U238	NOG1 - 3.d
/Users/224742i/Desktop/2019-06-10 GA UPb 7700/CTEM - 11.csv	2019-06-10 23:32:22.000	2019-06-10 23:34:06.893	2022-02-28 11:04:00.904	200	22	Si29,Ca43,Ti49,Zr91,La139,Ce140,Pr141,Nd146,Sm147,Eu153,Gd157,Dy163,Er166,Yb172,Lu175,Hf178,Pb204,Pb206,Pb207,Pb208,Th232,U238	CTEM - 11.d
/Users/224742i/Desktop/2019-06-10 GA UPb 7700/R33 - 14.csv	2019-06-11 03:23:07.000	2019-06-11 03:24:51.892	2022-02-28 11:04:00.910	200	22	Si29,Ca43,Ti49,Zr91,La139,Ce140,Pr141,Nd146,Sm147,Eu153,Gd157,Dy163,Er166,Yb172,Lu175,Hf178,Pb204,Pb206,Pb207,Pb208,Th232,U238	R33 - 14.d
/Users/224742i/Desktop/2019-06-10 GA UPb 7700/483 - 4.csv	2019-06-10 18:52:08.000	2019-06-10 18:53:52.893	2022-02-28 11:04:00.923	200	22	Si29,Ca43,Ti49,Zr91,La139,Ce140,Pr141,Nd146,Sm147,Eu153,Gd157,Dy163,Er166,Yb172,Lu175,Hf178,Pb204,Pb206,Pb207,Pb208,Th232,U238	483 - 4.d
/Users/224742i/Desktop/2019-06-10 GA UPb 7700/NQGN - 24.csv	2019-06-11 04:22:59.000	2019-06-11 04:24:43.893	2022-02-28 11:03:59.618	200	22	Si29,Ca43,Ti49,Zr91,La139,Ce140,Pr141,Nd146,Sm147,Eu153,Gd157,Dy163,Er166,Yb172,Lu175,Hf178,Pb204,Pb206,Pb207,Pb208,Th232,U238	NQGN - 24.d
/Users/224742i/Desktop/2019-06-10 GA UPb 7700/COG1 - 13.csv	2019-06-11 02:23:15.000	2019-06-11 02:24:59.893	2022-02-28 11:04:00.930	200	22	Si29,Ca43,Ti49,Zr91,La139,Ce140,Pr141,Nd146,Sm147,Eu153,Gd157,Dy163,Er166,Yb172,Lu175,Hf178,Pb204,Pb206,Pb207,Pb208,Th232,U238	COG1 - 13.d
/Users/224742i/Desktop/2019-06-10 GA UPb 7700/CQGN - 10.csv	2019-06-11 05:10:05.000	2019-06-11 05:11:49.893	2022-02-28 11:04:00.937	200	22	Si29,Ca43,Ti49,Zr91,La139,Ce140,Pr141,Nd146,Sm147,Eu153,Gd157,Dy163,Er166,Yb172,Lu175,Hf178,Pb204,Pb206,Pb207,Pb208,Th232,U238	CQGN - 10.d
/Users/224742i/Desktop/2019-06-10 GA UPb 7700/91500 - 18.csv	2019-06-11 06:11:58.000	2019-06-11 06:13:42.893	2022-02-28 11:04:00.949	200	22	Si29,Ca43,Ti49,Zr91,La139,Ce140,Pr141,Nd146,Sm147,Eu153,Gd157,Dy163,Er166,Yb172,Lu175,Hf178,Pb204,Pb206,Pb207,Pb208,Th232,U238	91500 - 18.d
/Users/224742i/Desktop/2019-06-10 GA UPb 7700/482 - 1.csv	2019-06-10 17:28:36.000	2019-06-10 17:30:20.893	2022-02-28 11:04:00.956	200	22	Si29,Ca43,Ti49,Zr91,La139,Ce140,Pr141,Nd146,Sm147,Eu153,Gd157,Dy163,Er166,Yb172,Lu175,Hf178,Pb204,Pb206,Pb207,Pb208,Th232,U238	482 - 1.d
/Users/224742i/Desktop/2019-06-10 GA UPb 7700/612 - 6.csv	2019-06-10 23:21:31.000	2019-06-10 23:23:15.893	2022-02-28 11:04:00.969	200	22	Si29,Ca43,Ti49,Zr91,La139,Ce140,Pr141,Nd146,Sm147,Eu153,Gd157,Dy163,Er166,Yb172,Lu175,Hf178,Pb204,Pb206,Pb207,Pb208,Th232,U238	612 - 6.d
/Users/224742i/Desktop/2019-06-10 GA UPb 7700/612 - 7.csv	2019-06-11 01:08:14.000	2019-06-11 01:09:58.893	2022-02-28 11:04:01.016	200	22	Si29,Ca43,Ti49,Zr91,La139,Ce140,Pr141,Nd146,Sm147,Eu153,Gd157,Dy163,Er166,Yb172,Lu175,Hf178,Pb204,Pb206,Pb207,Pb208,Th232,U238	612 - 7.d
/Users/224742i/Desktop/2019-06-10 GA UPb 7700/CQGN - 11.csv	2019-06-11 05:20:52.000	2019-06-11 05:22:36.893	2022-02-28 11:04:01.023	200	22	Si29,Ca43,Ti49,Zr91,La139,Ce140,Pr141,Nd146,Sm147,Eu153,Gd157,Dy163,Er166,Yb172,Lu175,Hf178,Pb204,Pb206,Pb207,Pb208,Th232,U238	CQGN - 11.d
/Users/224742i/Desktop/2019-06-10 GA UPb 7700/COG1 - 12.csv	2019-06-11 02:21:10.000	2019-06-11 02:22:54.893	2022-02-28 11:04:01.035	200	22	Si29,Ca43,Ti49,Zr91,La139,Ce140,Pr141,Nd146,Sm147,Eu153,Gd157,Dy163,Er166,Yb172,Lu175,Hf178,Pb204,Pb206,Pb207,Pb208,Th232,U238	COG1 - 12.d
/Users/224742i/Desktop/2019-06-10 GA UPb 7700/COG1 - 1.csv	2019-06-11 01:49:04.000	2019-06-11 01:50:48.893	2022-02-28 11:04:01.042	200	22	Si29,Ca43,Ti49,Zr91,La139,Ce140,Pr141,Nd146,Sm147,Eu153,Gd157,Dy163,Er166,Yb172,Lu175,Hf178,Pb204,Pb206,Pb207,Pb208,Th232,U238	COG1 - 1.d
/Users/224742i/Desktop/2019-06-10 GA UPb 7700/R33 - 15.csv	2019-06-11 04:14:17.000	2019-06-11 04:16:01.892	2022-02-28 11:04:01.055	200	22	Si29,Ca43,Ti49,Zr91,La139,Ce140,Pr141,Nd146,Sm147,Eu153,Gd157,Dy163,Er166,Yb172,Lu175,Hf178,Pb204,Pb206,Pb207,Pb208,Th232,U238	R33 - 15.d
/Users/224742i/Desktop/2019-06-10 GA UPb 7700/NQGN - 30.csv	2019-06-11 04:35:43.000	2019-06-11 04:37:27.893	2022-02-28 11:03:59.622	200	22	Si29,Ca43,Ti49,Zr91,La139,Ce140,Pr141,Nd146,Sm147,Eu153,Gd157,Dy163,Er166,Yb172,Lu175,Hf178,Pb204,Pb206,Pb207,Pb208,Th232,U238	NQGN - 30.d
/Users/224742i/Desktop/2019-06-10 GA UPb 7700/483 - 5.csv	2019-06-10 18:54:12.000	2019-06-10 18:55:56.893	2022-02-28 11:04:01.062	200	22	Si29,Ca43,Ti49,Zr91,La139,Ce140,Pr141,Nd146,Sm147,Eu153,Gd157,Dy163,Er166,Yb172,Lu175,Hf178,Pb204,Pb206,Pb207,Pb208,Th232,U238	483 - 5.d
/Users/224742i/Desktop/2019-06-10 GA UPb 7700/CTEM - 10.csv	2019-06-10 23:08:34.000	2019-06-10 23:10:18.893	2022-02-28 11:04:01.069	200	22	Si29,Ca43,Ti49,Zr91,La139,Ce140,Pr141,Nd146,Sm147,Eu153,Gd157,Dy163,Er166,Yb172,Lu175,Hf178,Pb204,Pb206,Pb207,Pb208,Th232,U238	CTEM - 10.d
/Users/224742i/Desktop/2019-06-10 GA UPb 7700/NOG1 - 2.csv	2019-06-11 00:25:49.000	2019-06-11 00:27:33.893	2022-02-28 11:04:01.082	200	22	Si29,Ca43,Ti49,Zr91,La139,Ce140,Pr141,Nd146,Sm147,Eu153,Gd157,Dy163,Er166,Yb172,Lu175,Hf178,Pb204,Pb206,Pb207,Pb208,Th232,U238	NOG1 - 2.d
/Users/224742i/Desktop/2019-06-10 GA UPb 7700/mud - 2.csv	2019-06-10 15:28:47.000	2019-06-10 15:30:31.892	2022-02-28 11:04:01.089	200	22	Si29,Ca43,Ti49,Zr91,La139,Ce140,Pr141,Nd146,Sm147,Eu153,Gd157,Dy163,Er166,Yb172,Lu175,Hf178,Pb204,Pb206,Pb207,Pb208,Th232,U238	mud - 2.d
/Users/224742i/Desktop/2019-06-10 GA UPb 7700/240 - 23.csv	2019-06-10 21:06:33.000	2019-06-10 21:08:17.892	2022-02-28 11:04:01.111	200	22	Si29,Ca43,Ti49,Zr91,La139,Ce140,Pr141,Nd146,Sm147,Eu153,Gd157,Dy163,Er166,Yb172,Lu175,Hf178,Pb204,Pb206,Pb207,Pb208,Th232,U238	240 - 23.d
/Users/224742i/Desktop/2019-06-10 GA UPb 7700/240 - 4.csv	2019-06-10 20:17:37.000	2019-06-10 20:19:21.892	2022-02-28 11:04:01.119	200	22	Si29,Ca43,Ti49,Zr91,La139,Ce140,Pr141,Nd146,Sm147,Eu153,Gd157,Dy163,Er166,Yb172,Lu175,Hf178,Pb204,Pb206,Pb207,Pb208,Th232,U238	240 - 4.d
/Users/224742i/Desktop/2019-06-10 GA UPb 7700/506 - 7.csv	2019-06-10 14:54:46.000	2019-06-10 14:56:30.893	2022-02-28 11:04:01.126	200	22	Si29,Ca43,Ti49,Zr91,La139,Ce140,Pr141,Nd146,Sm147,Eu153,Gd157,Dy163,Er166,Yb172,Lu175,Hf178,Pb204,Pb206,Pb207,Pb208,Th232,U238	506 - 7.d
/Users/224742i/Desktop/2019-06-10 GA UPb 7700/483 - 27.csv	2019-06-10 20:02:39.000	2019-06-10 20:04:23.893	2022-02-28 11:04:01.140	200	22	Si29,Ca43,Ti49,Zr91,La139,Ce140,Pr141,Nd146,Sm147,Eu153,Gd157,Dy163,Er166,Yb172,Lu175,Hf178,Pb204,Pb206,Pb207,Pb208,Th232,U238	483 - 27.d
/Users/224742i/Desktop/2019-06-10 GA UPb 7700/483 - 23.csv	2019-06-10 19:41:03.000	2019-06-10 19:42:47.893	2022-02-28 11:04:01.147	200	22	Si29,Ca43,Ti49,Zr91,La139,Ce140,Pr141,Nd146,Sm147,Eu153,Gd157,Dy163,Er166,Yb172,Lu175,Hf178,Pb204,Pb206,Pb207,Pb208,Th232,U238	483 - 23.d
/Users/224742i/Desktop/2019-06-10 GA UPb 7700/482 - 23.csv	2019-06-10 18:39:20.000	2019-06-10 18:41:04.893	2022-02-28 11:04:01.161	200	22	Si29,Ca43,Ti49,Zr91,La139,Ce140,Pr141,Nd146,Sm147,Eu153,Gd157,Dy163,Er166,Yb172,Lu175,Hf178,Pb204,Pb206,Pb207,Pb208,Th232,U238	482 - 23.d
/Users/224742i/Desktop/2019-06-10 GA UPb 7700/NTEM - 9.csv	2019-06-10 21:51:53.000	2019-06-10 21:53:37.893	2022-02-28 11:03:59.626	200	22	Si29,Ca43,Ti49,Zr91,La139,Ce140,Pr141,Nd146,Sm147,Eu153,Gd157,Dy163,Er166,Yb172,Lu175,Hf178,Pb204,Pb206,Pb207,Pb208,Th232,U238	NTEM - 9.d
/Users/224742i/Desktop/2019-06-10 GA UPb 7700/506 - 3.csv	2019-06-10 14:46:16.000	2019-06-10 14:48:00.893	2022-02-28 11:04:01.169	200	22	Si29,Ca43,Ti49,Zr91,La139,Ce140,Pr141,Nd146,Sm147,Eu153,Gd157,Dy163,Er166,Yb172,Lu175,Hf178,Pb204,Pb206,Pb207,Pb208,Th232,U238	506 - 3.d
/Users/224742i/Desktop/2019-06-10 GA UPb 7700/NOG1 - 6.csv	2019-06-11 00:34:16.000	2019-06-11 00:36:00.893	2022-02-28 11:04:01.176	200	22	Si29,Ca43,Ti49,Zr91,La139,Ce140,Pr141,Nd146,Sm147,Eu153,Gd157,Dy163,Er166,Yb172,Lu175,Hf178,Pb204,Pb206,Pb207,Pb208,Th232,U238	NOG1 - 6.d
/Users/224742i/Desktop/2019-06-10 GA UPb 7700/mud - 6.csv	2019-06-10 19:21:51.000	2019-06-10 19:23:35.893	2022-02-28 11:04:01.190	200	22	Si29,Ca43,Ti49,Zr91,La139,Ce140,Pr141,Nd146,Sm147,Eu153,Gd157,Dy163,Er166,Yb172,Lu175,Hf178,Pb204,Pb206,Pb207,Pb208,Th232,U238	mud - 6.d
/Users/224742i/Desktop/2019-06-10 GA UPb 7700/CTEM - 28.csv	2019-06-11 00:08:34.000	2019-06-11 00:10:18.893	2022-02-28 11:04:01.242	200	22	Si29,Ca43,Ti49,Zr91,La139,Ce140,Pr141,Nd146,Sm147,Eu153,Gd157,Dy163,Er166,Yb172,Lu175,Hf178,Pb204,Pb206,Pb207,Pb208,Th232,U238	CTEM - 28.d
/Users/224742i/Desktop/2019-06-10 GA UPb 7700/ples - 9.csv	2019-06-11 04:52:56.000	2019-06-11 04:54:40.893	2022-02-28 11:04:01.247	200	22	Si29,Ca43,Ti49,Zr91,La139,Ce140,Pr141,Nd146,Sm147,Eu153,Gd157,Dy163,Er166,Yb172,Lu175,Hf178,Pb204,Pb206,Pb207,Pb208,Th232,U238	ples - 9.d
/Users/224742i/Desktop/2019-06-10 GA UPb 7700/CTEM - 14.csv	2019-06-10 23:38:53.000	2019-06-10 23:40:37.893	2022-02-28 11:04:01.260	200	22	Si29,Ca43,Ti49,Zr91,La139,Ce140,Pr141,Nd146,Sm147,Eu153,Gd157,Dy163,Er166,Yb172,Lu175,Hf178,Pb204,Pb206,Pb207,Pb208,Th232,U238	CTEM - 14.d
/Users/224742i/Desktop/2019-06-10 GA UPb 7700/COG1 - 5.csv	2019-06-11 01:57:33.000	2019-06-11 01:59:17.893	2022-02-28 11:04:01.268	200	22	Si29,Ca43,Ti49,Zr91,La139,Ce140,Pr141,Nd146,Sm147,Eu153,Gd157,Dy163,Er166,Yb172,Lu175,Hf178,Pb204,Pb206,Pb207,Pb208,Th232,U238	COG1 - 5.d
/Users/224742i/Desktop/2019-06-10 GA UPb 7700/COG1 - 16.csv	2019-06-11 02:29:38.000	2019-06-11 02:31:22.893	2022-02-28 11:04:01.282	200	22	Si29,Ca43,Ti49,Zr91,La139,Ce140,Pr141,Nd146,Sm147,Eu153,Gd157,Dy163,Er166,Yb172,Lu175,Hf178,Pb204,Pb206,Pb207,Pb208,Th232,U238	COG1 - 16.d
/Users/224742i/Desktop/2019-06-10 GA UPb 7700/483 - 1.csv	2019-06-10 18:45:44.000	2019-06-10 18:47:28.893	2022-02-28 11:04:01.290	200	22	Si29,Ca43,Ti49,Zr91,La139,Ce140,Pr141,Nd146,Sm147,Eu153,Gd157,Dy163,Er166,Yb172,Lu175,Hf178,Pb204,Pb206,Pb207,Pb208,Th232,U238	483 - 1.d
/Users/224742i/Desktop/2019-06-10 GA UPb 7700/R33 - 11.csv	2019-06-11 00:21:21.000	2019-06-11 00:23:05.893	2022-02-28 11:04:01.298	200	22	Si29,Ca43,Ti49,Zr91,La139,Ce140,Pr141,Nd146,Sm147,Eu153,Gd157,Dy163,Er166,Yb172,Lu175,Hf178,Pb204,Pb206,Pb207,Pb208,Th232,U238	R33 - 11.d
/Users/224742i/Desktop/2019-06-10 GA UPb 7700/NTEM - 8.csv	2019-06-10 21:49:44.000	2019-06-10 21:51:28.893	2022-02-28 11:03:59.629	200	22	Si29,Ca43,Ti49,Zr91,La139,Ce140,Pr141,Nd146,Sm147,Eu153,Gd157,Dy163,Er166,Yb172,Lu175,Hf178,Pb204,Pb206,Pb207,Pb208,Th232,U238	NTEM - 8.d
/Users/224742i/Desktop/2019-06-10 GA UPb 7700/CQGN - 29.csv	2019-06-11 05:59:08.000	2019-06-11 06:00:52.893	2022-02-28 11:04:01.311	200	22	Si29,Ca43,Ti49,Zr91,La139,Ce140,Pr141,Nd146,Sm147,Eu153,Gd157,Dy163,Er166,Yb172,Lu175,Hf178,Pb204,Pb206,Pb207,Pb208,Th232,U238	CQGN - 29.d
/Users/224742i/Desktop/2019-06-10 GA UPb 7700/CQGN - 15.csv	2019-06-11 05:29:28.000	2019-06-11 05:31:12.892	2022-02-28 11:04:01.319	200	22	Si29,Ca43,Ti49,Zr91,La139,Ce140,Pr141,Nd146,Sm147,Eu153,Gd157,Dy163,Er166,Yb172,Lu175,Hf178,Pb204,Pb206,Pb207,Pb208,Th232,U238	CQGN - 15.d
/Users/224742i/Desktop/2019-06-10 GA UPb 7700/482 - 4.csv	2019-06-10 17:35:05.000	2019-06-10 17:36:49.893	2022-02-28 11:04:01.341	200	22	Si29,Ca43,Ti49,Zr91,La139,Ce140,Pr141,Nd146,Sm147,Eu153,Gd157,Dy163,Er166,Yb172,Lu175,Hf178,Pb204,Pb206,Pb207,Pb208,Th232,U238	482 - 4.d
/Users/224742i/Desktop/2019-06-10 GA UPb 7700/612 - 3.csv	2019-06-10 17:56:20.000	2019-06-10 17:58:04.893	2022-02-28 11:04:01.349	200	22	Si29,Ca43,Ti49,Zr91,La139,Ce140,Pr141,Nd146,Sm147,Eu153,Gd157,Dy163,Er166,Yb172,Lu175,Hf178,Pb204,Pb206,Pb207,Pb208,Th232,U238	612 - 3.d
/Users/224742i/Desktop/2019-06-10 GA UPb 7700/612 - 2.csv	2019-06-10 16:09:24.000	2019-06-10 16:11:08.893	2022-02-28 11:04:01.357	200	22	Si29,Ca43,Ti49,Zr91,La139,Ce140,Pr141,Nd146,Sm147,Eu153,Gd157,Dy163,Er166,Yb172,Lu175,Hf178,Pb204,Pb206,Pb207,Pb208,Th232,U238	612 - 2.d
/Users/224742i/Desktop/2019-06-10 GA UPb 7700/482 - 5.csv	2019-06-10 17:37:10.000	2019-06-10 17:38:54.893	2022-02-28 11:04:01.372	200	22	Si29,Ca43,Ti49,Zr91,La139,Ce140,Pr141,Nd146,Sm147,Eu153,Gd157,Dy163,Er166,Yb172,Lu175,Hf178,Pb204,Pb206,Pb207,Pb208,Th232,U238	482 - 5.d
/Users/224742i/Desktop/2019-06-10 GA UPb 7700/CQGN - 14.csv	2019-06-11 05:27:19.000	2019-06-11 05:29:03.893	2022-02-28 11:04:01.380	200	22	Si29,Ca43,Ti49,Zr91,La139,Ce140,Pr141,Nd146,Sm147,Eu153,Gd157,Dy163,Er166,Yb172,Lu175,Hf178,Pb204,Pb206,Pb207,Pb208,Th232,U238	CQGN - 14.d
/Users/224742i/Desktop/2019-06-10 GA UPb 7700/CQGN - 28.csv	2019-06-11 05:56:59.000	2019-06-11 05:58:43.893	2022-02-28 11:04:01.394	200	22	Si29,Ca43,Ti49,Zr91,La139,Ce140,Pr141,Nd146,Sm147,Eu153,Gd157,Dy163,Er166,Yb172,Lu175,Hf178,Pb204,Pb206,Pb207,Pb208,Th232,U238	CQGN - 28.d
/Users/224742i/Desktop/2019-06-10 GA UPb 7700/R33 - 10.csv	2019-06-10 23:17:06.000	2019-06-10 23:18:50.892	2022-02-28 11:04:01.402	200	22	Si29,Ca43,Ti49,Zr91,La139,Ce140,Pr141,Nd146,Sm147,Eu153,Gd157,Dy163,Er166,Yb172,Lu175,Hf178,Pb204,Pb206,Pb207,Pb208,Th232,U238	R33 - 10.d
/Users/224742i/Desktop/2019-06-10 GA UPb 7700/COG1 - 17.csv	2019-06-11 02:31:44.000	2019-06-11 02:33:28.892	2022-02-28 11:04:01.409	200	22	Si29,Ca43,Ti49,Zr91,La139,Ce140,Pr141,Nd146,Sm147,Eu153,Gd157,Dy163,Er166,Yb172,Lu175,Hf178,Pb204,Pb206,Pb207,Pb208,Th232,U238	COG1 - 17.d
/Users/224742i/Desktop/2019-06-10 GA UPb 7700/NQGN - 25.csv	2019-06-11 04:25:08.000	2019-06-11 04:26:52.893	2022-02-28 11:03:59.633	200	22	Si29,Ca43,Ti49,Zr91,La139,Ce140,Pr141,Nd146,Sm147,Eu153,Gd157,Dy163,Er166,Yb172,Lu175,Hf178,Pb204,Pb206,Pb207,Pb208,Th232,U238	NQGN - 25.d
/Users/224742i/Desktop/2019-06-10 GA UPb 7700/COG1 - 4.csv	2019-06-11 01:55:28.000	2019-06-11 01:57:12.893	2022-02-28 11:04:01.424	200	22	Si29,Ca43,Ti49,Zr91,La139,Ce140,Pr141,Nd146,Sm147,Eu153,Gd157,Dy163,Er166,Yb172,Lu175,Hf178,Pb204,Pb206,Pb207,Pb208,Th232,U238	COG1 - 4.d
/Users/224742i/Desktop/2019-06-10 GA UPb 7700/CTEM - 15.csv	2019-06-10 23:40:58.000	2019-06-10 23:42:42.893	2022-02-28 11:04:01.472	200	22	Si29,Ca43,Ti49,Zr91,La139,Ce140,Pr141,Nd146,Sm147,Eu153,Gd157,Dy163,Er166,Yb172,Lu175,Hf178,Pb204,Pb206,Pb207,Pb208,Th232,U238	CTEM - 15.d
/Users/224742i/Desktop/2019-06-10 GA UPb 7700/CTEM - 29.csv	2019-06-11 00:10:39.000	2019-06-11 00:12:23.893	2022-02-28 11:04:01.480	200	22	Si29,Ca43,Ti49,Zr91,La139,Ce140,Pr141,Nd146,Sm147,Eu153,Gd157,Dy163,Er166,Yb172,Lu175,Hf178,Pb204,Pb206,Pb207,Pb208,Th232,U238	CTEM - 29.d
/Users/224742i/Desktop/2019-06-10 GA UPb 7700/ples - 8.csv	2019-06-11 03:03:49.000	2019-06-11 03:05:33.893	2022-02-28 11:04:01.494	200	22	Si29,Ca43,Ti49,Zr91,La139,Ce140,Pr141,Nd146,Sm147,Eu153,Gd157,Dy163,Er166,Yb172,Lu175,Hf178,Pb204,Pb206,Pb207,Pb208,Th232,U238	ples - 8.d
/Users/224742i/Desktop/2019-06-10 GA UPb 7700/mud - 7.csv	2019-06-10 20:26:11.000	2019-06-10 20:27:55.893	2022-02-28 11:04:01.503	200	22	Si29,Ca43,Ti49,Zr91,La139,Ce140,Pr141,Nd146,Sm147,Eu153,Gd157,Dy163,Er166,Yb172,Lu175,Hf178,Pb204,Pb206,Pb207,Pb208,Th232,U238	mud - 7.d
/Users/224742i/Desktop/2019-06-10 GA UPb 7700/NOG1 - 7.csv	2019-06-11 00:36:22.000	2019-06-11 00:38:06.893	2022-02-28 11:04:01.517	200	22	Si29,Ca43,Ti49,Zr91,La139,Ce140,Pr141,Nd146,Sm147,Eu153,Gd157,Dy163,Er166,Yb172,Lu175,Hf178,Pb204,Pb206,Pb207,Pb208,Th232,U238	NOG1 - 7.d
/Users/224742i/Desktop/2019-06-10 GA UPb 7700/506 - 2.csv	2019-06-10 14:44:11.000	2019-06-10 14:45:55.893	2022-02-28 11:04:01.526	200	22	Si29,Ca43,Ti49,Zr91,La139,Ce140,Pr141,Nd146,Sm147,Eu153,Gd157,Dy163,Er166,Yb172,Lu175,Hf178,Pb204,Pb206,Pb207,Pb208,Th232,U238	506 - 2.d
/Users/224742i/Desktop/2019-06-10 GA UPb 7700/482 - 22.csv	2019-06-10 18:35:02.000	2019-06-10 18:36:46.893	2022-02-28 11:04:01.534	200	22	Si29,Ca43,Ti49,Zr91,La139,Ce140,Pr141,Nd146,Sm147,Eu153,Gd157,Dy163,Er166,Yb172,Lu175,Hf178,Pb204,Pb206,Pb207,Pb208,Th232,U238	482 - 22.d
/Users/224742i/Desktop/2019-06-10 GA UPb 7700/483 - 22.csv	2019-06-10 19:38:58.000	2019-06-10 19:40:42.893	2022-02-28 11:04:01.549	200	22	Si29,Ca43,Ti49,Zr91,La139,Ce140,Pr141,Nd146,Sm147,Eu153,Gd157,Dy163,Er166,Yb172,Lu175,Hf178,Pb204,Pb206,Pb207,Pb208,Th232,U238	483 - 22.d
/Users/224742i/Desktop/2019-06-10 GA UPb 7700/482 - 20.csv	2019-06-10 18:22:06.000	2019-06-10 18:23:50.893	2022-02-28 11:04:01.558	200	22	Si29,Ca43,Ti49,Zr91,La139,Ce140,Pr141,Nd146,Sm147,Eu153,Gd157,Dy163,Er166,Yb172,Lu175,Hf178,Pb204,Pb206,Pb207,Pb208,Th232,U238	482 - 20.d
/Users/224742i/Desktop/2019-06-10 GA UPb 7700/FC1 - 3.csv	2019-06-10 17:58:25.000	2019-06-10 18:00:09.893	2022-02-28 11:03:59.554	200	22	Si29,Ca43,Ti49,Zr91,La139,Ce140,Pr141,Nd146,Sm147,Eu153,Gd157,Dy163,Er166,Yb172,Lu175,Hf178,Pb204,Pb206,Pb207,Pb208,Th232,U238	FC1 - 3.d
/Users/224742i/Desktop/2019-06-10 GA UPb 7700/NQGN - 8.csv	2019-06-11 03:40:19.000	2019-06-11 03:42:03.893	2022-02-28 11:03:59.670	200	22	Si29,Ca43,Ti49,Zr91,La139,Ce140,Pr141,Nd146,Sm147,Eu153,Gd157,Dy163,Er166,Yb172,Lu175,Hf178,Pb204,Pb206,Pb207,Pb208,Th232,U238	NQGN - 8.d
/Users/224742i/Desktop/2019-06-10 GA UPb 7700/483 - 20.csv	2019-06-10 19:34:44.000	2019-06-10 19:36:28.893	2022-02-28 11:04:01.582	200	22	Si29,Ca43,Ti49,Zr91,La139,Ce140,Pr141,Nd146,Sm147,Eu153,Gd157,Dy163,Er166,Yb172,Lu175,Hf178,Pb204,Pb206,Pb207,Pb208,Th232,U238	483 - 20.d
/Users/224742i/Desktop/2019-06-10 GA UPb 7700/240 - 18.csv	2019-06-10 20:56:00.000	2019-06-10 20:57:44.893	2022-02-28 11:04:01.590	200	22	Si29,Ca43,Ti49,Zr91,La139,Ce140,Pr141,Nd146,Sm147,Eu153,Gd157,Dy163,Er166,Yb172,Lu175,Hf178,Pb204,Pb206,Pb207,Pb208,Th232,U238	240 - 18.d
/Users/224742i/Desktop/2019-06-10 GA UPb 7700/240 - 24.csv	2019-06-10 21:08:42.000	2019-06-10 21:10:26.893	2022-02-28 11:04:01.598	200	22	Si29,Ca43,Ti49,Zr91,La139,Ce140,Pr141,Nd146,Sm147,Eu153,Gd157,Dy163,Er166,Yb172,Lu175,Hf178,Pb204,Pb206,Pb207,Pb208,Th232,U238	240 - 24.d
/Users/224742i/Desktop/2019-06-10 GA UPb 7700/240 - 3.csv	2019-06-10 20:15:27.000	2019-06-10 20:17:11.893	2022-02-28 11:04:01.614	200	22	Si29,Ca43,Ti49,Zr91,La139,Ce140,Pr141,Nd146,Sm147,Eu153,Gd157,Dy163,Er166,Yb172,Lu175,Hf178,Pb204,Pb206,Pb207,Pb208,Th232,U238	240 - 3.d
/Users/224742i/Desktop/2019-06-10 GA UPb 7700/NOG1 - 5.csv	2019-06-11 00:32:07.000	2019-06-11 00:33:51.893	2022-02-28 11:04:01.623	200	22	Si29,Ca43,Ti49,Zr91,La139,Ce140,Pr141,Nd146,Sm147,Eu153,Gd157,Dy163,Er166,Yb172,Lu175,Hf178,Pb204,Pb206,Pb207,Pb208,Th232,U238	NOG1 - 5.d
/Users/224742i/Desktop/2019-06-10 GA UPb 7700/mud - 5.csv	2019-06-10 18:28:29.000	2019-06-10 18:30:13.893	2022-02-28 11:04:01.639	200	22	Si29,Ca43,Ti49,Zr91,La139,Ce140,Pr141,Nd146,Sm147,Eu153,Gd157,Dy163,Er166,Yb172,Lu175,Hf178,Pb204,Pb206,Pb207,Pb208,Th232,U238	mud - 5.d
/Users/224742i/Desktop/2019-06-10 GA UPb 7700/CTEM - 17.csv	2019-06-10 23:45:13.000	2019-06-10 23:46:57.893	2022-02-28 11:04:01.649	200	22	Si29,Ca43,Ti49,Zr91,La139,Ce140,Pr141,Nd146,Sm147,Eu153,Gd157,Dy163,Er166,Yb172,Lu175,Hf178,Pb204,Pb206,Pb207,Pb208,Th232,U238	CTEM - 17.d
/Users/224742i/Desktop/2019-06-10 GA UPb 7700/COG1 - 15.csv	2019-06-11 02:27:29.000	2019-06-11 02:29:13.893	2022-02-28 11:04:01.657	200	22	Si29,Ca43,Ti49,Zr91,La139,Ce140,Pr141,Nd146,Sm147,Eu153,Gd157,Dy163,Er166,Yb172,Lu175,Hf178,Pb204,Pb206,Pb207,Pb208,Th232,U238	COG1 - 15.d
/Users/224742i/Desktop/2019-06-10 GA UPb 7700/COG1 - 6.csv	2019-06-11 01:59:42.000	2019-06-11 02:01:26.893	2022-02-28 11:04:01.672	200	22	Si29,Ca43,Ti49,Zr91,La139,Ce140,Pr141,Nd146,Sm147,Eu153,Gd157,Dy163,Er166,Yb172,Lu175,Hf178,Pb204,Pb206,Pb207,Pb208,Th232,U238	COG1 - 6.d
/Users/224742i/Desktop/2019-06-10 GA UPb 7700/COG1 - 29.csv	2019-06-11 03:10:18.000	2019-06-11 03:12:02.893	2022-02-28 11:04:01.723	200	22	Si29,Ca43,Ti49,Zr91,La139,Ce140,Pr141,Nd146,Sm147,Eu153,Gd157,Dy163,Er166,Yb172,Lu175,Hf178,Pb204,Pb206,Pb207,Pb208,Th232,U238	COG1 - 29.d
/Users/224742i/Desktop/2019-06-10 GA UPb 7700/NQGN - 19.csv	2019-06-11 04:03:40.000	2019-06-11 04:05:24.893	2022-02-28 11:03:59.676	200	22	Si29,Ca43,Ti49,Zr91,La139,Ce140,Pr141,Nd146,Sm147,Eu153,Gd157,Dy163,Er166,Yb172,Lu175,Hf178,Pb204,Pb206,Pb207,Pb208,Th232,U238	NQGN - 19.d
/Users/224742i/Desktop/2019-06-10 GA UPb 7700/R33 - 12.csv	2019-06-11 01:25:34.000	2019-06-11 01:27:18.893	2022-02-28 11:04:01.739	200	22	Si29,Ca43,Ti49,Zr91,La139,Ce140,Pr141,Nd146,Sm147,Eu153,Gd157,Dy163,Er166,Yb172,Lu175,Hf178,Pb204,Pb206,Pb207,Pb208,Th232,U238	R33 - 12.d
/Users/224742i/Desktop/2019-06-10 GA UPb 7700/483 - 2.csv	2019-06-10 18:47:54.000	2019-06-10 18:49:38.893	2022-02-28 11:04:01.747	200	22	Si29,Ca43,Ti49,Zr91,La139,Ce140,Pr141,Nd146,Sm147,Eu153,Gd157,Dy163,Er166,Yb172,Lu175,Hf178,Pb204,Pb206,Pb207,Pb208,Th232,U238	483 - 2.d
/Users/224742i/Desktop/2019-06-10 GA UPb 7700/CQGN - 16.csv	2019-06-11 05:31:33.000	2019-06-11 05:33:17.893	2022-02-28 11:04:01.757	200	22	Si29,Ca43,Ti49,Zr91,La139,Ce140,Pr141,Nd146,Sm147,Eu153,Gd157,Dy163,Er166,Yb172,Lu175,Hf178,Pb204,Pb206,Pb207,Pb208,Th232,U238	CQGN - 16.d
/Users/224742i/Desktop/2019-06-10 GA UPb 7700/482 - 7.csv	2019-06-10 17:41:25.000	2019-06-10 17:43:09.893	2022-02-28 11:04:01.776	200	22	Si29,Ca43,Ti49,Zr91,La139,Ce140,Pr141,Nd146,Sm147,Eu153,Gd157,Dy163,Er166,Yb172,Lu175,Hf178,Pb204,Pb206,Pb207,Pb208,Th232,U238	482 - 7.d
/Users/224742i/Desktop/2019-06-10 GA UPb 7700/612 - 1.csv	2019-06-10 14:22:23.000	2019-06-10 14:24:07.893	2022-02-28 11:04:01.786	200	22	Si29,Ca43,Ti49,Zr91,La139,Ce140,Pr141,Nd146,Sm147,Eu153,Gd157,Dy163,Er166,Yb172,Lu175,Hf178,Pb204,Pb206,Pb207,Pb208,Th232,U238	612 - 1.d
/Users/224742i/Desktop/2019-06-10 GA UPb 7700/482 - 6.csv	2019-06-10 17:39:20.000	2019-06-10 17:41:04.893	2022-02-28 11:04:01.796	200	22	Si29,Ca43,Ti49,Zr91,La139,Ce140,Pr141,Nd146,Sm147,Eu153,Gd157,Dy163,Er166,Yb172,Lu175,Hf178,Pb204,Pb206,Pb207,Pb208,Th232,U238	482 - 6.d
/Users/224742i/Desktop/2019-06-10 GA UPb 7700/CQGN - 17.csv	2019-06-11 05:33:42.000	2019-06-11 05:35:26.893	2022-02-28 11:04:01.812	200	22	Si29,Ca43,Ti49,Zr91,La139,Ce140,Pr141,Nd146,Sm147,Eu153,Gd157,Dy163,Er166,Yb172,Lu175,Hf178,Pb204,Pb206,Pb207,Pb208,Th232,U238	CQGN - 17.d
/Users/224742i/Desktop/2019-06-10 GA UPb 7700/R33 - 13.csv	2019-06-11 02:16:44.000	2019-06-11 02:18:28.893	2022-02-28 11:04:01.821	200	22	Si29,Ca43,Ti49,Zr91,La139,Ce140,Pr141,Nd146,Sm147,Eu153,Gd157,Dy163,Er166,Yb172,Lu175,Hf178,Pb204,Pb206,Pb207,Pb208,Th232,U238	R33 - 13.d
/Users/224742i/Desktop/2019-06-10 GA UPb 7700/483 - 3.csv	2019-06-10 18:49:59.000	2019-06-10 18:51:43.893	2022-02-28 11:04:01.845	200	22	Si29,Ca43,Ti49,Zr91,La139,Ce140,Pr141,Nd146,Sm147,Eu153,Gd157,Dy163,Er166,Yb172,Lu175,Hf178,Pb204,Pb206,Pb207,Pb208,Th232,U238	483 - 3.d
/Users/224742i/Desktop/2019-06-10 GA UPb 7700/COG1 - 28.csv	2019-06-11 03:08:14.000	2019-06-11 03:09:58.893	2022-02-28 11:04:01.853	200	22	Si29,Ca43,Ti49,Zr91,La139,Ce140,Pr141,Nd146,Sm147,Eu153,Gd157,Dy163,Er166,Yb172,Lu175,Hf178,Pb204,Pb206,Pb207,Pb208,Th232,U238	COG1 - 28.d
/Users/224742i/Desktop/2019-06-10 GA UPb 7700/508 - 30.csv	2019-06-10 17:17:55.000	2019-06-10 17:19:39.893	2022-02-28 11:03:59.681	200	22	Si29,Ca43,Ti49,Zr91,La139,Ce140,Pr141,Nd146,Sm147,Eu153,Gd157,Dy163,Er166,Yb172,Lu175,Hf178,Pb204,Pb206,Pb207,Pb208,Th232,U238	508 - 30.d
/Users/224742i/Desktop/2019-06-10 GA UPb 7700/COG1 - 7.csv	2019-06-11 02:01:47.000	2019-06-11 02:03:31.893	2022-02-28 11:04:01.863	200	22	Si29,Ca43,Ti49,Zr91,La139,Ce140,Pr141,Nd146,Sm147,Eu153,Gd157,Dy163,Er166,Yb172,Lu175,Hf178,Pb204,Pb206,Pb207,Pb208,Th232,U238	COG1 - 7.d
/Users/224742i/Desktop/2019-06-10 GA UPb 7700/COG1 - 14.csv	2019-06-11 02:25:24.000	2019-06-11 02:27:08.892	2022-02-28 11:04:01.880	200	22	Si29,Ca43,Ti49,Zr91,La139,Ce140,Pr141,Nd146,Sm147,Eu153,Gd157,Dy163,Er166,Yb172,Lu175,Hf178,Pb204,Pb206,Pb207,Pb208,Th232,U238	COG1 - 14.d
/Users/224742i/Desktop/2019-06-10 GA UPb 7700/612 - 10.csv	2019-06-11 06:22:48.000	2019-06-11 06:24:32.893	2022-02-28 11:04:01.888	200	22	Si29,Ca43,Ti49,Zr91,La139,Ce140,Pr141,Nd146,Sm147,Eu153,Gd157,Dy163,Er166,Yb172,Lu175,Hf178,Pb204,Pb206,Pb207,Pb208,Th232,U238	612 - 10.d
/Users/224742i/Desktop/2019-06-10 GA UPb 7700/CTEM - 16.csv	2019-06-10 23:43:08.000	2019-06-10 23:44:52.893	2022-02-28 11:04:01.904	200	22	Si29,Ca43,Ti49,Zr91,La139,Ce140,Pr141,Nd146,Sm147,Eu153,Gd157,Dy163,Er166,Yb172,Lu175,Hf178,Pb204,Pb206,Pb207,Pb208,Th232,U238	CTEM - 16.d
/Users/224742i/Desktop/2019-06-10 GA UPb 7700/mud - 4.csv	2019-06-10 17:24:18.000	2019-06-10 17:26:02.893	2022-02-28 11:04:01.915	200	22	Si29,Ca43,Ti49,Zr91,La139,Ce140,Pr141,Nd146,Sm147,Eu153,Gd157,Dy163,Er166,Yb172,Lu175,Hf178,Pb204,Pb206,Pb207,Pb208,Th232,U238	mud - 4.d
/Users/224742i/Desktop/2019-06-10 GA UPb 7700/NOG1 - 4.csv	2019-06-11 00:30:03.000	2019-06-11 00:31:47.893	2022-02-28 11:04:01.924	200	22	Si29,Ca43,Ti49,Zr91,La139,Ce140,Pr141,Nd146,Sm147,Eu153,Gd157,Dy163,Er166,Yb172,Lu175,Hf178,Pb204,Pb206,Pb207,Pb208,Th232,U238	NOG1 - 4.d
/Users/224742i/Desktop/2019-06-10 GA UPb 7700/240 - 25.csv	2019-06-10 21:10:47.000	2019-06-10 21:12:31.893	2022-02-28 11:04:01.941	200	22	Si29,Ca43,Ti49,Zr91,La139,Ce140,Pr141,Nd146,Sm147,Eu153,Gd157,Dy163,Er166,Yb172,Lu175,Hf178,Pb204,Pb206,Pb207,Pb208,Th232,U238	240 - 25.d
/Users/224742i/Desktop/2019-06-10 GA UPb 7700/240 - 2.csv	2019-06-10 20:13:22.000	2019-06-10 20:15:06.893	2022-02-28 11:04:01.991	200	22	Si29,Ca43,Ti49,Zr91,La139,Ce140,Pr141,Nd146,Sm147,Eu153,Gd157,Dy163,Er166,Yb172,Lu175,Hf178,Pb204,Pb206,Pb207,Pb208,Th232,U238	240 - 2.d
/Users/224742i/Desktop/2019-06-10 GA UPb 7700/240 - 19.csv	2019-06-10 20:58:04.000	2019-06-10 20:59:48.893	2022-02-28 11:04:02.009	200	22	Si29,Ca43,Ti49,Zr91,La139,Ce140,Pr141,Nd146,Sm147,Eu153,Gd157,Dy163,Er166,Yb172,Lu175,Hf178,Pb204,Pb206,Pb207,Pb208,Th232,U238	240 - 19.d
/Users/224742i/Desktop/2019-06-10 GA UPb 7700/506 - 1.csv	2019-06-10 14:41:56.000	2019-06-10 14:43:40.893	2022-02-28 11:04:02.018	200	22	Si29,Ca43,Ti49,Zr91,La139,Ce140,Pr141,Nd146,Sm147,Eu153,Gd157,Dy163,Er166,Yb172,Lu175,Hf178,Pb204,Pb206,Pb207,Pb208,Th232,U238	506 - 1.d
/Users/224742i/Desktop/2019-06-10 GA UPb 7700/508 - 24.csv	2019-06-10 17:05:13.000	2019-06-10 17:06:57.893	2022-02-28 11:03:59.685	200	22	Si29,Ca43,Ti49,Zr91,La139,Ce140,Pr141,Nd146,Sm147,Eu153,Gd157,Dy163,Er166,Yb172,Lu175,Hf178,Pb204,Pb206,Pb207,Pb208,Th232,U238	508 - 24.d
/Users/224742i/Desktop/2019-06-10 GA UPb 7700/483 - 21.csv	2019-06-10 19:36:49.000	2019-06-10 19:38:33.893	2022-02-28 11:04:02.027	200	22	Si29,Ca43,Ti49,Zr91,La139,Ce140,Pr141,Nd146,Sm147,Eu153,Gd157,Dy163,Er166,Yb172,Lu175,Hf178,Pb204,Pb206,Pb207,Pb208,Th232,U238	483 - 21.d
/Users/224742i/Desktop/2019-06-10 GA UPb 7700/482 - 21.csv	2019-06-10 18:32:49.000	2019-06-10 18:34:33.893	2022-02-28 11:04:02.046	200	22	Si29,Ca43,Ti49,Zr91,La139,Ce140,Pr141,Nd146,Sm147,Eu153,Gd157,Dy163,Er166,Yb172,Lu175,Hf178,Pb204,Pb206,Pb207,Pb208,Th232,U238	482 - 21.d
/Users/224742i/Desktop/2019-06-10 GA UPb 7700/483 - 10.csv	2019-06-10 19:04:52.000	2019-06-10 19:06:36.893	2022-02-28 11:04:02.061	200	22	Si29,Ca43,Ti49,Zr91,La139,Ce140,Pr141,Nd146,Sm147,Eu153,Gd157,Dy163,Er166,Yb172,Lu175,Hf178,Pb204,Pb206,Pb207,Pb208,Th232,U238	483 - 10.d
/Users/224742i/Desktop/2019-06-10 GA UPb 7700/482 - 10.csv	2019-06-10 17:47:48.000	2019-06-10 17:49:32.893	2022-02-28 11:04:02.078	200	22	Si29,Ca43,Ti49,Zr91,La139,Ce140,Pr141,Nd146,Sm147,Eu153,Gd157,Dy163,Er166,Yb172,Lu175,Hf178,Pb204,Pb206,Pb207,Pb208,Th232,U238	482 - 10.d
/Users/224742i/Desktop/2019-06-10 GA UPb 7700/240 - 14.csv	2019-06-10 20:47:31.000	2019-06-10 20:49:15.893	2022-02-28 11:04:02.087	200	22	Si29,Ca43,Ti49,Zr91,La139,Ce140,Pr141,Nd146,Sm147,Eu153,Gd157,Dy163,Er166,Yb172,Lu175,Hf178,Pb204,Pb206,Pb207,Pb208,Th232,U238	240 - 14.d
/Users/224742i/Desktop/2019-06-10 GA UPb 7700/NOG1 - 9.csv	2019-06-11 00:40:36.000	2019-06-11 00:42:20.893	2022-02-28 11:04:02.103	200	22	Si29,Ca43,Ti49,Zr91,La139,Ce140,Pr141,Nd146,Sm147,Eu153,Gd157,Dy163,Er166,Yb172,Lu175,Hf178,Pb204,Pb206,Pb207,Pb208,Th232,U238	NOG1 - 9.d
/Users/224742i/Desktop/2019-06-10 GA UPb 7700/mud - 9.csv	2019-06-10 22:21:37.000	2019-06-10 22:23:21.892	2022-02-28 11:04:02.121	200	22	Si29,Ca43,Ti49,Zr91,La139,Ce140,Pr141,Nd146,Sm147,Eu153,Gd157,Dy163,Er166,Yb172,Lu175,Hf178,Pb204,Pb206,Pb207,Pb208,Th232,U238	mud - 9.d
/Users/224742i/Desktop/2019-06-10 GA UPb 7700/ples - 6.csv	2019-06-10 23:30:13.000	2019-06-10 23:31:57.893	2022-02-28 11:04:02.130	200	22	Si29,Ca43,Ti49,Zr91,La139,Ce140,Pr141,Nd146,Sm147,Eu153,Gd157,Dy163,Er166,Yb172,Lu175,Hf178,Pb204,Pb206,Pb207,Pb208,Th232,U238	ples - 6.d
/Users/224742i/Desktop/2019-06-10 GA UPb 7700/CTEM - 27.csv	2019-06-11 00:06:25.000	2019-06-11 00:08:09.893	2022-02-28 11:04:02.138	200	22	Si29,Ca43,Ti49,Zr91,La139,Ce140,Pr141,Nd146,Sm147,Eu153,Gd157,Dy163,Er166,Yb172,Lu175,Hf178,Pb204,Pb206,Pb207,Pb208,Th232,U238	CTEM - 27.d
/Users/224742i/Desktop/2019-06-10 GA UPb 7700/COG1 - 19.csv	2019-06-11 02:35:58.000	2019-06-11 02:37:42.893	2022-02-28 11:04:02.156	200	22	Si29,Ca43,Ti49,Zr91,La139,Ce140,Pr141,Nd146,Sm147,Eu153,Gd157,Dy163,Er166,Yb172,Lu175,Hf178,Pb204,Pb206,Pb207,Pb208,Th232,U238	COG1 - 19.d
/Users/224742i/Desktop/2019-06-10 GA UPb 7700/NOG1 - 26.csv	2019-06-11 01:38:31.000	2019-06-11 01:40:15.893	2022-02-28 11:03:59.689	200	22	Si29,Ca43,Ti49,Zr91,La139,Ce140,Pr141,Nd146,Sm147,Eu153,Gd157,Dy163,Er166,Yb172,Lu175,Hf178,Pb204,Pb206,Pb207,Pb208,Th232,U238	NOG1 - 26.d
/Users/224742i/Desktop/2019-06-10 GA UPb 7700/COG1 - 25.csv	2019-06-11 02:48:40.000	2019-06-11 02:50:24.893	2022-02-28 11:04:02.166	200	22	Si29,Ca43,Ti49,Zr91,La139,Ce140,Pr141,Nd146,Sm147,Eu153,Gd157,Dy163,Er166,Yb172,Lu175,Hf178,Pb204,Pb206,Pb207,Pb208,Th232,U238	COG1 - 25.d
/Users/224742i/Desktop/2019-06-10 GA UPb 7700/CQGN - 26.csv	2019-06-11 05:52:44.000	2019-06-11 05:54:28.893	2022-02-28 11:04:02.183	200	22	Si29,Ca43,Ti49,Zr91,La139,Ce140,Pr141,Nd146,Sm147,Eu153,Gd157,Dy163,Er166,Yb172,Lu175,Hf178,Pb204,Pb206,Pb207,Pb208,Th232,U238	CQGN - 26.d
/Users/224742i/Desktop/2019-06-10 GA UPb 7700/91500 - 12.csv	2019-06-11 01:19:06.000	2019-06-11 01:20:50.893	2022-02-28 11:04:02.194	200	22	Si29,Ca43,Ti49,Zr91,La139,Ce140,Pr141,Nd146,Sm147,Eu153,Gd157,Dy163,Er166,Yb172,Lu175,Hf178,Pb204,Pb206,Pb207,Pb208,Th232,U238	91500 - 12.d
/Users/224742i/Desktop/2019-06-10 GA UPb 7700/CQGN - 27.csv	2019-06-11 05:54:54.000	2019-06-11 05:56:38.893	2022-02-28 11:04:02.203	200	22	Si29,Ca43,Ti49,Zr91,La139,Ce140,Pr141,Nd146,Sm147,Eu153,Gd157,Dy163,Er166,Yb172,Lu175,Hf178,Pb204,Pb206,Pb207,Pb208,Th232,U238	CQGN - 27.d
/Users/224742i/Desktop/2019-06-10 GA UPb 7700/91500 - 13.csv	2019-06-11 02:10:16.000	2019-06-11 02:12:00.892	2022-02-28 11:04:02.262	200	22	Si29,Ca43,Ti49,Zr91,La139,Ce140,Pr141,Nd146,Sm147,Eu153,Gd157,Dy163,Er166,Yb172,Lu175,Hf178,Pb204,Pb206,Pb207,Pb208,Th232,U238	91500 - 13.d
/Users/224742i/Desktop/2019-06-10 GA UPb 7700/COG1 - 24.csv	2019-06-11 02:46:36.000	2019-06-11 02:48:20.892	2022-02-28 11:04:02.271	200	22	Si29,Ca43,Ti49,Zr91,La139,Ce140,Pr141,Nd146,Sm147,Eu153,Gd157,Dy163,Er166,Yb172,Lu175,Hf178,Pb204,Pb206,Pb207,Pb208,Th232,U238	COG1 - 24.d
/Users/224742i/Desktop/2019-06-10 GA UPb 7700/COG1 - 30.csv	2019-06-11 03:12:28.000	2019-06-11 03:14:12.893	2022-02-28 11:04:02.291	200	22	Si29,Ca43,Ti49,Zr91,La139,Ce140,Pr141,Nd146,Sm147,Eu153,Gd157,Dy163,Er166,Yb172,Lu175,Hf178,Pb204,Pb206,Pb207,Pb208,Th232,U238	COG1 - 30.d
/Users/224742i/Desktop/2019-06-10 GA UPb 7700/COG1 - 18.csv	2019-06-11 02:33:54.000	2019-06-11 02:35:38.893	2022-02-28 11:04:02.300	200	22	Si29,Ca43,Ti49,Zr91,La139,Ce140,Pr141,Nd146,Sm147,Eu153,Gd157,Dy163,Er166,Yb172,Lu175,Hf178,Pb204,Pb206,Pb207,Pb208,Th232,U238	COG1 - 18.d
/Users/224742i/Desktop/2019-06-10 GA UPb 7700/ples - 7.csv	2019-06-11 01:16:57.000	2019-06-11 01:18:41.892	2022-02-28 11:04:02.309	200	22	Si29,Ca43,Ti49,Zr91,La139,Ce140,Pr141,Nd146,Sm147,Eu153,Gd157,Dy163,Er166,Yb172,Lu175,Hf178,Pb204,Pb206,Pb207,Pb208,Th232,U238	ples - 7.d
/Users/224742i/Desktop/2019-06-10 GA UPb 7700/CTEM - 26.csv	2019-06-11 00:04:20.000	2019-06-11 00:06:04.893	2022-02-28 11:04:02.327	200	22	Si29,Ca43,Ti49,Zr91,La139,Ce140,Pr141,Nd146,Sm147,Eu153,Gd157,Dy163,Er166,Yb172,Lu175,Hf178,Pb204,Pb206,Pb207,Pb208,Th232,U238	CTEM - 26.d
/Users/224742i/Desktop/2019-06-10 GA UPb 7700/ogc - 3.csv	2019-06-10 18:00:37.000	2019-06-10 18:02:21.893	2022-02-28 11:03:59.693	200	22	Si29,Ca43,Ti49,Zr91,La139,Ce140,Pr141,Nd146,Sm147,Eu153,Gd157,Dy163,Er166,Yb172,Lu175,Hf178,Pb204,Pb206,Pb207,Pb208,Th232,U238	ogc - 3.d
/Users/224742i/Desktop/2019-06-10 GA UPb 7700/mud - 8.csv	2019-06-10 21:17:16.000	2019-06-10 21:19:00.893	2022-02-28 11:04:02.337	200	22	Si29,Ca43,Ti49,Zr91,La139,Ce140,Pr141,Nd146,Sm147,Eu153,Gd157,Dy163,Er166,Yb172,Lu175,Hf178,Pb204,Pb206,Pb207,Pb208,Th232,U238	mud - 8.d
/Users/224742i/Desktop/2019-06-10 GA UPb 7700/NOG1 - 8.csv	2019-06-11 00:38:31.000	2019-06-11 00:40:15.892	2022-02-28 11:04:02.355	200	22	Si29,Ca43,Ti49,Zr91,La139,Ce140,Pr141,Nd146,Sm147,Eu153,Gd157,Dy163,Er166,Yb172,Lu175,Hf178,Pb204,Pb206,Pb207,Pb208,Th232,U238	NOG1 - 8.d
/Users/224742i/Desktop/2019-06-10 GA UPb 7700/240 - 15.csv	2019-06-10 20:49:36.000	2019-06-10 20:51:20.893	2022-02-28 11:04:02.367	200	22	Si29,Ca43,Ti49,Zr91,La139,Ce140,Pr141,Nd146,Sm147,Eu153,Gd157,Dy163,Er166,Yb172,Lu175,Hf178,Pb204,Pb206,Pb207,Pb208,Th232,U238	240 - 15.d
/Users/224742i/Desktop/2019-06-10 GA UPb 7700/482 - 11.csv	2019-06-10 17:49:53.000	2019-06-10 17:51:37.893	2022-02-28 11:04:02.383	200	22	Si29,Ca43,Ti49,Zr91,La139,Ce140,Pr141,Nd146,Sm147,Eu153,Gd157,Dy163,Er166,Yb172,Lu175,Hf178,Pb204,Pb206,Pb207,Pb208,Th232,U238	482 - 11.d
/Users/224742i/Desktop/2019-06-10 GA UPb 7700/483 - 11.csv	2019-06-10 19:06:55.000	2019-06-10 19:08:39.893	2022-02-28 11:04:02.402	200	22	Si29,Ca43,Ti49,Zr91,La139,Ce140,Pr141,Nd146,Sm147,Eu153,Gd157,Dy163,Er166,Yb172,Lu175,Hf178,Pb204,Pb206,Pb207,Pb208,Th232,U238	483 - 11.d
/Users/224742i/Desktop/2019-06-10 GA UPb 7700/482 - 13.csv	2019-06-10 18:07:10.000	2019-06-10 18:08:54.893	2022-02-28 11:04:02.412	200	22	Si29,Ca43,Ti49,Zr91,La139,Ce140,Pr141,Nd146,Sm147,Eu153,Gd157,Dy163,Er166,Yb172,Lu175,Hf178,Pb204,Pb206,Pb207,Pb208,Th232,U238	482 - 13.d
/Users/224742i/Desktop/2019-06-10 GA UPb 7700/483 - 13.csv	2019-06-10 19:11:10.000	2019-06-10 19:12:54.893	2022-02-28 11:04:02.424	200	22	Si29,Ca43,Ti49,Zr91,La139,Ce140,Pr141,Nd146,Sm147,Eu153,Gd157,Dy163,Er166,Yb172,Lu175,Hf178,Pb204,Pb206,Pb207,Pb208,Th232,U238	483 - 13.d
/Users/224742i/Desktop/2019-06-10 GA UPb 7700/240 - 17.csv	2019-06-10 20:53:49.000	2019-06-10 20:55:33.893	2022-02-28 11:04:02.444	200	22	Si29,Ca43,Ti49,Zr91,La139,Ce140,Pr141,Nd146,Sm147,Eu153,Gd157,Dy163,Er166,Yb172,Lu175,Hf178,Pb204,Pb206,Pb207,Pb208,Th232,U238	240 - 17.d
/Users/224742i/Desktop/2019-06-10 GA UPb 7700/CTEM - 24.csv	2019-06-11 00:00:05.000	2019-06-11 00:01:49.893	2022-02-28 11:04:02.454	200	22	Si29,Ca43,Ti49,Zr91,La139,Ce140,Pr141,Nd146,Sm147,Eu153,Gd157,Dy163,Er166,Yb172,Lu175,Hf178,Pb204,Pb206,Pb207,Pb208,Th232,U238	CTEM - 24.d
/Users/224742i/Desktop/2019-06-10 GA UPb 7700/ples - 5.csv	2019-06-10 21:41:04.000	2019-06-10 21:42:48.893	2022-02-28 11:04:02.473	200	22	Si29,Ca43,Ti49,Zr91,La139,Ce140,Pr141,Nd146,Sm147,Eu153,Gd157,Dy163,Er166,Yb172,Lu175,Hf178,Pb204,Pb206,Pb207,Pb208,Th232,U238	ples - 5.d
/Users/224742i/Desktop/2019-06-10 GA UPb 7700/508 - 18.csv	2019-06-10 16:52:31.000	2019-06-10 16:54:15.893	2022-02-28 11:03:59.698	200	22	Si29,Ca43,Ti49,Zr91,La139,Ce140,Pr141,Nd146,Sm147,Eu153,Gd157,Dy163,Er166,Yb172,Lu175,Hf178,Pb204,Pb206,Pb207,Pb208,Th232,U238	508 - 18.d
/Users/224742i/Desktop/2019-06-10 GA UPb 7700/CTEM - 30.csv	2019-06-11 00:12:48.000	2019-06-11 00:14:32.893	2022-02-28 11:04:02.483	200	22	Si29,Ca43,Ti49,Zr91,La139,Ce140,Pr141,Nd146,Sm147,Eu153,Gd157,Dy163,Er166,Yb172,Lu175,Hf178,Pb204,Pb206,Pb207,Pb208,Th232,U238	CTEM - 30.d
/Users/224742i/Desktop/2019-06-10 GA UPb 7700/CTEM - 18.csv	2019-06-10 23:47:22.000	2019-06-10 23:49:06.892	2022-02-28 11:04:02.494	200	22	Si29,Ca43,Ti49,Zr91,La139,Ce140,Pr141,Nd146,Sm147,Eu153,Gd157,Dy163,Er166,Yb172,Lu175,Hf178,Pb204,Pb206,Pb207,Pb208,Th232,U238	CTEM - 18.d
/Users/224742i/Desktop/2019-06-10 GA UPb 7700/COG1 - 9.csv	2019-06-11 02:06:02.000	2019-06-11 02:07:46.893	2022-02-28 11:04:02.554	200	22	Si29,Ca43,Ti49,Zr91,La139,Ce140,Pr141,Nd146,Sm147,Eu153,Gd157,Dy163,Er166,Yb172,Lu175,Hf178,Pb204,Pb206,Pb207,Pb208,Th232,U238	COG1 - 9.d
/Users/224742i/Desktop/2019-06-10 GA UPb 7700/COG1 - 26.csv	2019-06-11 02:50:49.000	2019-06-11 02:52:33.893	2022-02-28 11:04:02.564	200	22	Si29,Ca43,Ti49,Zr91,La139,Ce140,Pr141,Nd146,Sm147,Eu153,Gd157,Dy163,Er166,Yb172,Lu175,Hf178,Pb204,Pb206,Pb207,Pb208,Th232,U238	COG1 - 26.d
/Users/224742i/Desktop/2019-06-10 GA UPb 7700/91500 - 11.csv	2019-06-11 00:14:53.000	2019-06-11 00:16:37.893	2022-02-28 11:04:02.583	200	22	Si29,Ca43,Ti49,Zr91,La139,Ce140,Pr141,Nd146,Sm147,Eu153,Gd157,Dy163,Er166,Yb172,Lu175,Hf178,Pb204,Pb206,Pb207,Pb208,Th232,U238	91500 - 11.d
/Users/224742i/Desktop/2019-06-10 GA UPb 7700/CQGN - 25.csv	2019-06-11 05:50:39.000	2019-06-11 05:52:23.893	2022-02-28 11:04:02.592	200	22	Si29,Ca43,Ti49,Zr91,La139,Ce140,Pr141,Nd146,Sm147,Eu153,Gd157,Dy163,Er166,Yb172,Lu175,Hf178,Pb204,Pb206,Pb207,Pb208,Th232,U238	CQGN - 25.d
/Users/224742i/Desktop/2019-06-10 GA UPb 7700/CQGN - 19.csv	2019-06-11 05:37:56.000	2019-06-11 05:39:40.893	2022-02-28 11:04:02.601	200	22	Si29,Ca43,Ti49,Zr91,La139,Ce140,Pr141,Nd146,Sm147,Eu153,Gd157,Dy163,Er166,Yb172,Lu175,Hf178,Pb204,Pb206,Pb207,Pb208,Th232,U238	CQGN - 19.d
/Users/224742i/Desktop/2019-06-10 GA UPb 7700/482 - 8.csv	2019-06-10 17:43:34.000	2019-06-10 17:45:18.893	2022-02-28 11:04:02.621	200	22	Si29,Ca43,Ti49,Zr91,La139,Ce140,Pr141,Nd146,Sm147,Eu153,Gd157,Dy163,Er166,Yb172,Lu175,Hf178,Pb204,Pb206,Pb207,Pb208,Th232,U238	482 - 8.d
/Users/224742i/Desktop/2019-06-10 GA UPb 7700/482 - 9.csv	2019-06-10 17:45:39.000	2019-06-10 17:47:23.893	2022-02-28 11:04:02.632	200	22	Si29,Ca43,Ti49,Zr91,La139,Ce140,Pr141,Nd146,Sm147,Eu153,Gd157,Dy163,Er166,Yb172,Lu175,Hf178,Pb204,Pb206,Pb207,Pb208,Th232,U238	482 - 9.d
/Users/224742i/Desktop/2019-06-10 GA UPb 7700/CQGN - 18.csv	2019-06-11 05:35:47.000	2019-06-11 05:37:31.893	2022-02-28 11:04:02.652	200	22	Si29,Ca43,Ti49,Zr91,La139,Ce140,Pr141,Nd146,Sm147,Eu153,Gd157,Dy163,Er166,Yb172,Lu175,Hf178,Pb204,Pb206,Pb207,Pb208,Th232,U238	CQGN - 18.d
/Users/224742i/Desktop/2019-06-10 GA UPb 7700/NTEM - 24.csv	2019-06-10 22:32:23.000	2019-06-10 22:34:07.893	2022-02-28 11:03:59.702	200	22	Si29,Ca43,Ti49,Zr91,La139,Ce140,Pr141,Nd146,Sm147,Eu153,Gd157,Dy163,Er166,Yb172,Lu175,Hf178,Pb204,Pb206,Pb207,Pb208,Th232,U238	NTEM - 24.d
/Users/224742i/Desktop/2019-06-10 GA UPb 7700/91500 - 10.csv	2019-06-10 23:10:39.000	2019-06-10 23:12:23.893	2022-02-28 11:04:02.662	200	22	Si29,Ca43,Ti49,Zr91,La139,Ce140,Pr141,Nd146,Sm147,Eu153,Gd157,Dy163,Er166,Yb172,Lu175,Hf178,Pb204,Pb206,Pb207,Pb208,Th232,U238	91500 - 10.d
/Users/224742i/Desktop/2019-06-10 GA UPb 7700/CQGN - 24.csv	2019-06-11 05:48:29.000	2019-06-11 05:50:13.893	2022-02-28 11:04:02.679	200	22	Si29,Ca43,Ti49,Zr91,La139,Ce140,Pr141,Nd146,Sm147,Eu153,Gd157,Dy163,Er166,Yb172,Lu175,Hf178,Pb204,Pb206,Pb207,Pb208,Th232,U238	CQGN - 24.d
/Users/224742i/Desktop/2019-06-10 GA UPb 7700/CQGN - 30.csv	2019-06-11 06:01:13.000	2019-06-11 06:02:57.893	2022-02-28 11:04:02.698	200	22	Si29,Ca43,Ti49,Zr91,La139,Ce140,Pr141,Nd146,Sm147,Eu153,Gd157,Dy163,Er166,Yb172,Lu175,Hf178,Pb204,Pb206,Pb207,Pb208,Th232,U238	CQGN - 30.d
/Users/224742i/Desktop/2019-06-10 GA UPb 7700/COG1 - 27.csv	2019-06-11 03:05:58.000	2019-06-11 03:07:42.893	2022-02-28 11:04:02.707	200	22	Si29,Ca43,Ti49,Zr91,La139,Ce140,Pr141,Nd146,Sm147,Eu153,Gd157,Dy163,Er166,Yb172,Lu175,Hf178,Pb204,Pb206,Pb207,Pb208,Th232,U238	COG1 - 27.d
/Users/224742i/Desktop/2019-06-10 GA UPb 7700/ples - 10.csv	2019-06-11 06:31:30.000	2019-06-11 06:33:14.893	2022-02-28 11:04:02.726	200	22	Si29,Ca43,Ti49,Zr91,La139,Ce140,Pr141,Nd146,Sm147,Eu153,Gd157,Dy163,Er166,Yb172,Lu175,Hf178,Pb204,Pb206,Pb207,Pb208,Th232,U238	ples - 10.d
/Users/224742i/Desktop/2019-06-10 GA UPb 7700/COG1 - 8.csv	2019-06-11 02:03:57.000	2019-06-11 02:05:41.893	2022-02-28 11:04:02.736	200	22	Si29,Ca43,Ti49,Zr91,La139,Ce140,Pr141,Nd146,Sm147,Eu153,Gd157,Dy163,Er166,Yb172,Lu175,Hf178,Pb204,Pb206,Pb207,Pb208,Th232,U238	COG1 - 8.d
/Users/224742i/Desktop/2019-06-10 GA UPb 7700/CTEM - 19.csv	2019-06-10 23:49:27.000	2019-06-10 23:51:11.893	2022-02-28 11:04:02.745	200	22	Si29,Ca43,Ti49,Zr91,La139,Ce140,Pr141,Nd146,Sm147,Eu153,Gd157,Dy163,Er166,Yb172,Lu175,Hf178,Pb204,Pb206,Pb207,Pb208,Th232,U238	CTEM - 19.d
/Users/224742i/Desktop/2019-06-10 GA UPb 7700/CTEM - 25.csv	2019-06-11 00:02:10.000	2019-06-11 00:03:54.893	2022-02-28 11:04:02.765	200	22	Si29,Ca43,Ti49,Zr91,La139,Ce140,Pr141,Nd146,Sm147,Eu153,Gd157,Dy163,Er166,Yb172,Lu175,Hf178,Pb204,Pb206,Pb207,Pb208,Th232,U238	CTEM - 25.d
/Users/224742i/Desktop/2019-06-10 GA UPb 7700/ples - 4.csv	2019-06-10 19:54:03.000	2019-06-10 19:55:47.893	2022-02-28 11:04:02.776	200	22	Si29,Ca43,Ti49,Zr91,La139,Ce140,Pr141,Nd146,Sm147,Eu153,Gd157,Dy163,Er166,Yb172,Lu175,Hf178,Pb204,Pb206,Pb207,Pb208,Th232,U238	ples - 4.d
/Users/224742i/Desktop/2019-06-10 GA UPb 7700/240 - 16.csv	2019-06-10 20:51:44.000	2019-06-10 20:53:28.893	2022-02-28 11:04:02.786	200	22	Si29,Ca43,Ti49,Zr91,La139,Ce140,Pr141,Nd146,Sm147,Eu153,Gd157,Dy163,Er166,Yb172,Lu175,Hf178,Pb204,Pb206,Pb207,Pb208,Th232,U238	240 - 16.d
/Users/224742i/Desktop/2019-06-10 GA UPb 7700/NTEM - 30.csv	2019-06-10 22:45:07.000	2019-06-10 22:46:51.893	2022-02-28 11:03:59.706	200	22	Si29,Ca43,Ti49,Zr91,La139,Ce140,Pr141,Nd146,Sm147,Eu153,Gd157,Dy163,Er166,Yb172,Lu175,Hf178,Pb204,Pb206,Pb207,Pb208,Th232,U238	NTEM - 30.d
/Users/224742i/Desktop/2019-06-10 GA UPb 7700/483 - 12.csv	2019-06-10 19:09:05.000	2019-06-10 19:10:49.893	2022-02-28 11:04:02.850	200	22	Si29,Ca43,Ti49,Zr91,La139,Ce140,Pr141,Nd146,Sm147,Eu153,Gd157,Dy163,Er166,Yb172,Lu175,Hf178,Pb204,Pb206,Pb207,Pb208,Th232,U238	483 - 12.d
/Users/224742i/Desktop/2019-06-10 GA UPb 7700/482 - 12.csv	2019-06-10 17:52:02.000	2019-06-10 17:53:46.893	2022-02-28 11:04:02.861	200	22	Si29,Ca43,Ti49,Zr91,La139,Ce140,Pr141,Nd146,Sm147,Eu153,Gd157,Dy163,Er166,Yb172,Lu175,Hf178,Pb204,Pb206,Pb207,Pb208,Th232,U238	482 - 12.d
/Users/224742i/Desktop/2019-06-10 GA UPb 7700/482 - 16.csv	2019-06-10 18:13:39.000	2019-06-10 18:15:23.893	2022-02-28 11:04:02.881	200	22	Si29,Ca43,Ti49,Zr91,La139,Ce140,Pr141,Nd146,Sm147,Eu153,Gd157,Dy163,Er166,Yb172,Lu175,Hf178,Pb204,Pb206,Pb207,Pb208,Th232,U238	482 - 16.d
/Users/224742i/Desktop/2019-06-10 GA UPb 7700/483 - 16.csv	2019-06-10 19:26:10.000	2019-06-10 19:27:54.893	2022-02-28 11:04:02.892	200	22	Si29,Ca43,Ti49,Zr91,La139,Ce140,Pr141,Nd146,Sm147,Eu153,Gd157,Dy163,Er166,Yb172,Lu175,Hf178,Pb204,Pb206,Pb207,Pb208,Th232,U238	483 - 16.d
/Users/224742i/Desktop/2019-06-10 GA UPb 7700/240 - 9.csv	2019-06-10 20:36:52.000	2019-06-10 20:38:36.893	2022-02-28 11:04:02.902	200	22	Si29,Ca43,Ti49,Zr91,La139,Ce140,Pr141,Nd146,Sm147,Eu153,Gd157,Dy163,Er166,Yb172,Lu175,Hf178,Pb204,Pb206,Pb207,Pb208,Th232,U238	240 - 9.d
/Users/224742i/Desktop/2019-06-10 GA UPb 7700/240 - 12.csv	2019-06-10 20:43:17.000	2019-06-10 20:45:01.893	2022-02-28 11:04:02.924	200	22	Si29,Ca43,Ti49,Zr91,La139,Ce140,Pr141,Nd146,Sm147,Eu153,Gd157,Dy163,Er166,Yb172,Lu175,Hf178,Pb204,Pb206,Pb207,Pb208,Th232,U238	240 - 12.d
/Users/224742i/Desktop/2019-06-10 GA UPb 7700/CTEM - 21.csv	2019-06-10 23:53:41.000	2019-06-10 23:55:25.893	2022-02-28 11:04:02.934	200	22	Si29,Ca43,Ti49,Zr91,La139,Ce140,Pr141,Nd146,Sm147,Eu153,Gd157,Dy163,Er166,Yb172,Lu175,Hf178,Pb204,Pb206,Pb207,Pb208,Th232,U238	CTEM - 21.d
/Users/224742i/Desktop/2019-06-10 GA UPb 7700/COG1 - 23.csv	2019-06-11 02:44:26.000	2019-06-11 02:46:10.893	2022-02-28 11:04:02.955	200	22	Si29,Ca43,Ti49,Zr91,La139,Ce140,Pr141,Nd146,Sm147,Eu153,Gd157,Dy163,Er166,Yb172,Lu175,Hf178,Pb204,Pb206,Pb207,Pb208,Th232,U238	COG1 - 23.d
/Users/224742i/Desktop/2019-06-10 GA UPb 7700/R33 - 18.csv	2019-06-11 06:18:23.000	2019-06-11 06:20:07.893	2022-02-28 11:04:02.965	200	22	Si29,Ca43,Ti49,Zr91,La139,Ce140,Pr141,Nd146,Sm147,Eu153,Gd157,Dy163,Er166,Yb172,Lu175,Hf178,Pb204,Pb206,Pb207,Pb208,Th232,U238	R33 - 18.d
/Users/224742i/Desktop/2019-06-10 GA UPb 7700/483 - 8.csv	2019-06-10 19:00:37.000	2019-06-10 19:02:21.893	2022-02-28 11:04:02.983	200	22	Si29,Ca43,Ti49,Zr91,La139,Ce140,Pr141,Nd146,Sm147,Eu153,Gd157,Dy163,Er166,Yb172,Lu175,Hf178,Pb204,Pb206,Pb207,Pb208,Th232,U238	483 - 8.d
/Users/224742i/Desktop/2019-06-10 GA UPb 7700/NTEM - 18.csv	2019-06-10 22:10:55.000	2019-06-10 22:12:39.893	2022-02-28 11:03:59.737	200	22	Si29,Ca43,Ti49,Zr91,La139,Ce140,Pr141,Nd146,Sm147,Eu153,Gd157,Dy163,Er166,Yb172,Lu175,Hf178,Pb204,Pb206,Pb207,Pb208,Th232,U238	NTEM - 18.d
/Users/224742i/Desktop/2019-06-10 GA UPb 7700/CQGN - 20.csv	2019-06-11 05:40:01.000	2019-06-11 05:41:45.893	2022-02-28 11:04:03.003	200	22	Si29,Ca43,Ti49,Zr91,La139,Ce140,Pr141,Nd146,Sm147,Eu153,Gd157,Dy163,Er166,Yb172,Lu175,Hf178,Pb204,Pb206,Pb207,Pb208,Th232,U238	CQGN - 20.d
/Users/224742i/Desktop/2019-06-10 GA UPb 7700/91500 - 14.csv	2019-06-11 03:16:46.000	2019-06-11 03:18:30.893	2022-02-28 11:04:03.015	200	22	Si29,Ca43,Ti49,Zr91,La139,Ce140,Pr141,Nd146,Sm147,Eu153,Gd157,Dy163,Er166,Yb172,Lu175,Hf178,Pb204,Pb206,Pb207,Pb208,Th232,U238	91500 - 14.d
/Users/224742i/Desktop/2019-06-10 GA UPb 7700/ogc - 10.csv	2019-06-11 06:27:05.000	2019-06-11 06:28:49.893	2022-02-28 11:04:03.036	200	22	Si29,Ca43,Ti49,Zr91,La139,Ce140,Pr141,Nd146,Sm147,Eu153,Gd157,Dy163,Er166,Yb172,Lu175,Hf178,Pb204,Pb206,Pb207,Pb208,Th232,U238	ogc - 10.d
/Users/224742i/Desktop/2019-06-10 GA UPb 7700/CQGN - 21.csv	2019-06-11 05:42:11.000	2019-06-11 05:43:55.893	2022-02-28 11:04:03.046	200	22	Si29,Ca43,Ti49,Zr91,La139,Ce140,Pr141,Nd146,Sm147,Eu153,Gd157,Dy163,Er166,Yb172,Lu175,Hf178,Pb204,Pb206,Pb207,Pb208,Th232,U238	CQGN - 21.d
/Users/224742i/Desktop/2019-06-10 GA UPb 7700/91500 - 15.csv	2019-06-11 04:07:55.000	2019-06-11 04:09:39.893	2022-02-28 11:04:03.056	200	22	Si29,Ca43,Ti49,Zr91,La139,Ce140,Pr141,Nd146,Sm147,Eu153,Gd157,Dy163,Er166,Yb172,Lu175,Hf178,Pb204,Pb206,Pb207,Pb208,Th232,U238	91500 - 15.d
/Users/224742i/Desktop/2019-06-10 GA UPb 7700/483 - 9.csv	2019-06-10 19:02:41.000	2019-06-10 19:04:25.893	2022-02-28 11:04:03.077	200	22	Si29,Ca43,Ti49,Zr91,La139,Ce140,Pr141,Nd146,Sm147,Eu153,Gd157,Dy163,Er166,Yb172,Lu175,Hf178,Pb204,Pb206,Pb207,Pb208,Th232,U238	483 - 9.d
/Users/224742i/Desktop/2019-06-10 GA UPb 7700/COG1 - 22.csv	2019-06-11 02:42:22.000	2019-06-11 02:44:06.892	2022-02-28 11:04:03.088	200	22	Si29,Ca43,Ti49,Zr91,La139,Ce140,Pr141,Nd146,Sm147,Eu153,Gd157,Dy163,Er166,Yb172,Lu175,Hf178,Pb204,Pb206,Pb207,Pb208,Th232,U238	COG1 - 22.d
/Users/224742i/Desktop/2019-06-10 GA UPb 7700/ples - 1.csv	2019-06-10 14:31:07.000	2019-06-10 14:32:51.893	2022-02-28 11:04:03.110	200	22	Si29,Ca43,Ti49,Zr91,La139,Ce140,Pr141,Nd146,Sm147,Eu153,Gd157,Dy163,Er166,Yb172,Lu175,Hf178,Pb204,Pb206,Pb207,Pb208,Th232,U238	ples - 1.d
/Users/224742i/Desktop/2019-06-10 GA UPb 7700/CTEM - 20.csv	2019-06-10 23:51:36.000	2019-06-10 23:53:20.893	2022-02-28 11:04:03.161	200	22	Si29,Ca43,Ti49,Zr91,La139,Ce140,Pr141,Nd146,Sm147,Eu153,Gd157,Dy163,Er166,Yb172,Lu175,Hf178,Pb204,Pb206,Pb207,Pb208,Th232,U238	CTEM - 20.d
/Users/224742i/Desktop/2019-06-10 GA UPb 7700/240 - 13.csv	2019-06-10 20:45:21.000	2019-06-10 20:47:05.893	2022-02-28 11:04:03.172	200	22	Si29,Ca43,Ti49,Zr91,La139,Ce140,Pr141,Nd146,Sm147,Eu153,Gd157,Dy163,Er166,Yb172,Lu175,Hf178,Pb204,Pb206,Pb207,Pb208,Th232,U238	240 - 13.d
/Users/224742i/Desktop/2019-06-10 GA UPb 7700/506 - 10.csv	2019-06-10 15:01:10.000	2019-06-10 15:02:54.893	2022-02-28 11:03:59.558	200	22	Si29,Ca43,Ti49,Zr91,La139,Ce140,Pr141,Nd146,Sm147,Eu153,Gd157,Dy163,Er166,Yb172,Lu175,Hf178,Pb204,Pb206,Pb207,Pb208,Th232,U238	506 - 10.d
/Users/224742i/Desktop/2019-06-10 GA UPb 7700/91500 - 1.csv	2019-06-10 14:33:15.000	2019-06-10 14:34:59.893	2022-02-28 11:03:59.741	200	22	Si29,Ca43,Ti49,Zr91,La139,Ce140,Pr141,Nd146,Sm147,Eu153,Gd157,Dy163,Er166,Yb172,Lu175,Hf178,Pb204,Pb206,Pb207,Pb208,Th232,U238	91500 - 1.d
/Users/224742i/Desktop/2019-06-10 GA UPb 7700/240 - 8.csv	2019-06-10 20:34:48.000	2019-06-10 20:36:32.893	2022-02-28 11:04:03.194	200	22	Si29,Ca43,Ti49,Zr91,La139,Ce140,Pr141,Nd146,Sm147,Eu153,Gd157,Dy163,Er166,Yb172,Lu175,Hf178,Pb204,Pb206,Pb207,Pb208,Th232,U238	240 - 8.d
/Users/224742i/Desktop/2019-06-10 GA UPb 7700/483 - 17.csv	2019-06-10 19:28:21.000	2019-06-10 19:30:05.893	2022-02-28 11:04:03.205	200	22	Si29,Ca43,Ti49,Zr91,La139,Ce140,Pr141,Nd146,Sm147,Eu153,Gd157,Dy163,Er166,Yb172,Lu175,Hf178,Pb204,Pb206,Pb207,Pb208,Th232,U238	483 - 17.d
/Users/224742i/Desktop/2019-06-10 GA UPb 7700/482 - 17.csv	2019-06-10 18:15:44.000	2019-06-10 18:17:28.893	2022-02-28 11:04:03.216	200	22	Si29,Ca43,Ti49,Zr91,La139,Ce140,Pr141,Nd146,Sm147,Eu153,Gd157,Dy163,Er166,Yb172,Lu175,Hf178,Pb204,Pb206,Pb207,Pb208,Th232,U238	482 - 17.d
/Users/224742i/Desktop/2019-06-10 GA UPb 7700/483 - 29.csv	2019-06-10 20:06:54.000	2019-06-10 20:08:38.893	2022-02-28 11:04:03.239	200	22	Si29,Ca43,Ti49,Zr91,La139,Ce140,Pr141,Nd146,Sm147,Eu153,Gd157,Dy163,Er166,Yb172,Lu175,Hf178,Pb204,Pb206,Pb207,Pb208,Th232,U238	483 - 29.d
/Users/224742i/Desktop/2019-06-10 GA UPb 7700/483 - 15.csv	2019-06-10 19:15:24.000	2019-06-10 19:17:08.893	2022-02-28 11:04:03.250	200	22	Si29,Ca43,Ti49,Zr91,La139,Ce140,Pr141,Nd146,Sm147,Eu153,Gd157,Dy163,Er166,Yb172,Lu175,Hf178,Pb204,Pb206,Pb207,Pb208,Th232,U238	483 - 15.d
/Users/224742i/Desktop/2019-06-10 GA UPb 7700/482 - 15.csv	2019-06-10 18:11:29.000	2019-06-10 18:13:13.893	2022-02-28 11:04:03.272	200	22	Si29,Ca43,Ti49,Zr91,La139,Ce140,Pr141,Nd146,Sm147,Eu153,Gd157,Dy163,Er166,Yb172,Lu175,Hf178,Pb204,Pb206,Pb207,Pb208,Th232,U238	482 - 15.d
/Users/224742i/Desktop/2019-06-10 GA UPb 7700/506 - 9.csv	2019-06-10 14:59:01.000	2019-06-10 15:00:45.893	2022-02-28 11:04:03.284	200	22	Si29,Ca43,Ti49,Zr91,La139,Ce140,Pr141,Nd146,Sm147,Eu153,Gd157,Dy163,Er166,Yb172,Lu175,Hf178,Pb204,Pb206,Pb207,Pb208,Th232,U238	506 - 9.d
/Users/224742i/Desktop/2019-06-10 GA UPb 7700/240 - 11.csv	2019-06-10 20:41:07.000	2019-06-10 20:42:51.893	2022-02-28 11:04:03.302	200	22	Si29,Ca43,Ti49,Zr91,La139,Ce140,Pr141,Nd146,Sm147,Eu153,Gd157,Dy163,Er166,Yb172,Lu175,Hf178,Pb204,Pb206,Pb207,Pb208,Th232,U238	240 - 11.d
/Users/224742i/Desktop/2019-06-10 GA UPb 7700/CTEM - 22.csv	2019-06-10 23:55:51.000	2019-06-10 23:57:35.893	2022-02-28 11:04:03.323	200	22	Si29,Ca43,Ti49,Zr91,La139,Ce140,Pr141,Nd146,Sm147,Eu153,Gd157,Dy163,Er166,Yb172,Lu175,Hf178,Pb204,Pb206,Pb207,Pb208,Th232,U238	CTEM - 22.d
/Users/224742i/Desktop/2019-06-10 GA UPb 7700/ples - 3.csv	2019-06-10 18:05:02.000	2019-06-10 18:06:46.892	2022-02-28 11:04:03.335	200	22	Si29,Ca43,Ti49,Zr91,La139,Ce140,Pr141,Nd146,Sm147,Eu153,Gd157,Dy163,Er166,Yb172,Lu175,Hf178,Pb204,Pb206,Pb207,Pb208,Th232,U238	ples - 3.d
/Users/224742i/Desktop/2019-06-10 GA UPb 7700/610 - 2.csv	2019-06-10 16:07:12.000	2019-06-10 16:08:56.893	2022-02-28 11:03:59.746	200	22	Si29,Ca43,Ti49,Zr91,La139,Ce140,Pr141,Nd146,Sm147,Eu153,Gd157,Dy163,Er166,Yb172,Lu175,Hf178,Pb204,Pb206,Pb207,Pb208,Th232,U238	610 - 2.d
/Users/224742i/Desktop/2019-06-10 GA UPb 7700/COG1 - 20.csv	2019-06-11 02:38:08.000	2019-06-11 02:39:52.893	2022-02-28 11:04:03.356	200	22	Si29,Ca43,Ti49,Zr91,La139,Ce140,Pr141,Nd146,Sm147,Eu153,Gd157,Dy163,Er166,Yb172,Lu175,Hf178,Pb204,Pb206,Pb207,Pb208,Th232,U238	COG1 - 20.d
/Users/224742i/Desktop/2019-06-10 GA UPb 7700/91500 - 17.csv	2019-06-11 06:03:22.000	2019-06-11 06:05:06.893	2022-02-28 11:04:03.368	200	22	Si29,Ca43,Ti49,Zr91,La139,Ce140,Pr141,Nd146,Sm147,Eu153,Gd157,Dy163,Er166,Yb172,Lu175,Hf178,Pb204,Pb206,Pb207,Pb208,Th232,U238	91500 - 17.d
/Users/224742i/Desktop/2019-06-10 GA UPb 7700/CQGN - 23.csv	2019-06-11 05:46:25.000	2019-06-11 05:48:09.892	2022-02-28 11:04:03.378	200	22	Si29,Ca43,Ti49,Zr91,La139,Ce140,Pr141,Nd146,Sm147,Eu153,Gd157,Dy163,Er166,Yb172,Lu175,Hf178,Pb204,Pb206,Pb207,Pb208,Th232,U238	CQGN - 23.d
/Users/224742i/Desktop/2019-06-10 GA UPb 7700/612 - 9.csv	2019-06-11 04:44:14.000	2019-06-11 04:45:58.893	2022-02-28 11:04:03.399	200	22	Si29,Ca43,Ti49,Zr91,La139,Ce140,Pr141,Nd146,Sm147,Eu153,Gd157,Dy163,Er166,Yb172,Lu175,Hf178,Pb204,Pb206,Pb207,Pb208,Th232,U238	612 - 9.d
/Users/224742i/Desktop/2019-06-10 GA UPb 7700/612 - 8.csv	2019-06-11 02:55:08.000	2019-06-11 02:56:52.893	2022-02-28 11:04:03.410	200	22	Si29,Ca43,Ti49,Zr91,La139,Ce140,Pr141,Nd146,Sm147,Eu153,Gd157,Dy163,Er166,Yb172,Lu175,Hf178,Pb204,Pb206,Pb207,Pb208,Th232,U238	612 - 8.d
/Users/224742i/Desktop/2019-06-10 GA UPb 7700/91500 - 16.csv	2019-06-11 05:12:14.000	2019-06-11 05:13:58.893	2022-02-28 11:04:03.434	200	22	Si29,Ca43,Ti49,Zr91,La139,Ce140,Pr141,Nd146,Sm147,Eu153,Gd157,Dy163,Er166,Yb172,Lu175,Hf178,Pb204,Pb206,Pb207,Pb208,Th232,U238	91500 - 16.d
/Users/224742i/Desktop/2019-06-10 GA UPb 7700/CQGN - 22.csv	2019-06-11 05:44:15.000	2019-06-11 05:45:59.893	2022-02-28 11:04:03.489	200	22	Si29,Ca43,Ti49,Zr91,La139,Ce140,Pr141,Nd146,Sm147,Eu153,Gd157,Dy163,Er166,Yb172,Lu175,Hf178,Pb204,Pb206,Pb207,Pb208,Th232,U238	CQGN - 22.d
/Users/224742i/Desktop/2019-06-10 GA UPb 7700/COG1 - 21.csv	2019-06-11 02:40:12.000	2019-06-11 02:41:56.893	2022-02-28 11:04:03.500	200	22	Si29,Ca43,Ti49,Zr91,La139,Ce140,Pr141,Nd146,Sm147,Eu153,Gd157,Dy163,Er166,Yb172,Lu175,Hf178,Pb204,Pb206,Pb207,Pb208,Th232,U238	COG1 - 21.d
/Users/224742i/Desktop/2019-06-10 GA UPb 7700/CTEM - 23.csv	2019-06-10 23:57:55.000	2019-06-10 23:59:39.893	2022-02-28 11:04:03.522	200	22	Si29,Ca43,Ti49,Zr91,La139,Ce140,Pr141,Nd146,Sm147,Eu153,Gd157,Dy163,Er166,Yb172,Lu175,Hf178,Pb204,Pb206,Pb207,Pb208,Th232,U238	CTEM - 23.d
/Users/224742i/Desktop/2019-06-10 GA UPb 7700/ples - 2.csv	2019-06-10 16:18:10.000	2019-06-10 16:19:54.893	2022-02-28 11:04:03.534	200	22	Si29,Ca43,Ti49,Zr91,La139,Ce140,Pr141,Nd146,Sm147,Eu153,Gd157,Dy163,Er166,Yb172,Lu175,Hf178,Pb204,Pb206,Pb207,Pb208,Th232,U238	ples - 2.d
/Users/224742i/Desktop/2019-06-10 GA UPb 7700/506 - 11.csv	2019-06-10 15:03:15.000	2019-06-10 15:04:59.893	2022-02-28 11:03:59.750	200	22	Si29,Ca43,Ti49,Zr91,La139,Ce140,Pr141,Nd146,Sm147,Eu153,Gd157,Dy163,Er166,Yb172,Lu175,Hf178,Pb204,Pb206,Pb207,Pb208,Th232,U238	506 - 11.d
/Users/224742i/Desktop/2019-06-10 GA UPb 7700/240 - 10.csv	2019-06-10 20:39:02.000	2019-06-10 20:40:46.893	2022-02-28 11:04:03.545	200	22	Si29,Ca43,Ti49,Zr91,La139,Ce140,Pr141,Nd146,Sm147,Eu153,Gd157,Dy163,Er166,Yb172,Lu175,Hf178,Pb204,Pb206,Pb207,Pb208,Th232,U238	240 - 10.d
/Users/224742i/Desktop/2019-06-10 GA UPb 7700/506 - 8.csv	2019-06-10 14:56:56.000	2019-06-10 14:58:40.893	2022-02-28 11:04:03.570	200	22	Si29,Ca43,Ti49,Zr91,La139,Ce140,Pr141,Nd146,Sm147,Eu153,Gd157,Dy163,Er166,Yb172,Lu175,Hf178,Pb204,Pb206,Pb207,Pb208,Th232,U238	506 - 8.d
/Users/224742i/Desktop/2019-06-10 GA UPb 7700/482 - 14.csv	2019-06-10 18:09:24.000	2019-06-10 18:11:08.893	2022-02-28 11:04:03.582	200	22	Si29,Ca43,Ti49,Zr91,La139,Ce140,Pr141,Nd146,Sm147,Eu153,Gd157,Dy163,Er166,Yb172,Lu175,Hf178,Pb204,Pb206,Pb207,Pb208,Th232,U238	482 - 14.d
/Users/224742i/Desktop/2019-06-10 GA UPb 7700/483 - 14.csv	2019-06-10 19:13:19.000	2019-06-10 19:15:03.893	2022-02-28 11:04:03.606	200	22	Si29,Ca43,Ti49,Zr91,La139,Ce140,Pr141,Nd146,Sm147,Eu153,Gd157,Dy163,Er166,Yb172,Lu175,Hf178,Pb204,Pb206,Pb207,Pb208,Th232,U238	483 - 14.d
/Users/224742i/Desktop/2019-06-10 GA UPb 7700/483 - 28.csv	2019-06-10 20:04:49.000	2019-06-10 20:06:33.893	2022-02-28 11:04:03.619	200	22	Si29,Ca43,Ti49,Zr91,La139,Ce140,Pr141,Nd146,Sm147,Eu153,Gd157,Dy163,Er166,Yb172,Lu175,Hf178,Pb204,Pb206,Pb207,Pb208,Th232,U238	483 - 28.d
/Users/224742i/Desktop/2019-06-10 GA UPb 7700/R33 - 6.csv	2019-06-10 19:23:56.000	2019-06-10 19:25:40.893	2022-02-28 11:04:03.638	200	22	Si29,Ca43,Ti49,Zr91,La139,Ce140,Pr141,Nd146,Sm147,Eu153,Gd157,Dy163,Er166,Yb172,Lu175,Hf178,Pb204,Pb206,Pb207,Pb208,Th232,U238	R33 - 6.d
/Users/224742i/Desktop/2019-06-10 GA UPb 7700/gj1 - 15.csv	2019-06-11 04:10:04.000	2019-06-11 04:11:48.893	2022-02-28 11:04:03.661	200	22	Si29,Ca43,Ti49,Zr91,La139,Ce140,Pr141,Nd146,Sm147,Eu153,Gd157,Dy163,Er166,Yb172,Lu175,Hf178,Pb204,Pb206,Pb207,Pb208,Th232,U238	gj1 - 15.d
/Users/224742i/Desktop/2019-06-10 GA UPb 7700/CQGN - 3.csv	2019-06-11 04:55:09.000	2019-06-11 04:56:53.893	2022-02-28 11:04:03.672	200	22	Si29,Ca43,Ti49,Zr91,La139,Ce140,Pr141,Nd146,Sm147,Eu153,Gd157,Dy163,Er166,Yb172,Lu175,Hf178,Pb204,Pb206,Pb207,Pb208,Th232,U238	CQGN - 3.d
/Users/224742i/Desktop/2019-06-10 GA UPb 7700/506 - 19.csv	2019-06-10 15:20:15.000	2019-06-10 15:21:59.893	2022-02-28 11:04:03.696	200	22	Si29,Ca43,Ti49,Zr91,La139,Ce140,Pr141,Nd146,Sm147,Eu153,Gd157,Dy163,Er166,Yb172,Lu175,Hf178,Pb204,Pb206,Pb207,Pb208,Th232,U238	506 - 19.d
/Users/224742i/Desktop/2019-06-10 GA UPb 7700/506 - 25.csv	2019-06-10 15:41:44.000	2019-06-10 15:43:28.893	2022-02-28 11:04:03.708	200	22	Si29,Ca43,Ti49,Zr91,La139,Ce140,Pr141,Nd146,Sm147,Eu153,Gd157,Dy163,Er166,Yb172,Lu175,Hf178,Pb204,Pb206,Pb207,Pb208,Th232,U238	506 - 25.d
/Users/224742i/Desktop/2019-06-10 GA UPb 7700/FC1 - 2.csv	2019-06-10 16:11:31.000	2019-06-10 16:13:15.893	2022-02-28 11:03:59.755	200	22	Si29,Ca43,Ti49,Zr91,La139,Ce140,Pr141,Nd146,Sm147,Eu153,Gd157,Dy163,Er166,Yb172,Lu175,Hf178,Pb204,Pb206,Pb207,Pb208,Th232,U238	FC1 - 2.d
/Users/224742i/Desktop/2019-06-10 GA UPb 7700/CTEM - 3.csv	2019-06-10 22:51:31.000	2019-06-10 22:53:15.893	2022-02-28 11:04:03.721	200	22	Si29,Ca43,Ti49,Zr91,La139,Ce140,Pr141,Nd146,Sm147,Eu153,Gd157,Dy163,Er166,Yb172,Lu175,Hf178,Pb204,Pb206,Pb207,Pb208,Th232,U238	CTEM - 3.d
/Users/224742i/Desktop/2019-06-10 GA UPb 7700/gj1 - 5.csv	2019-06-10 18:26:23.000	2019-06-10 18:28:07.893	2022-02-28 11:04:03.745	200	22	Si29,Ca43,Ti49,Zr91,La139,Ce140,Pr141,Nd146,Sm147,Eu153,Gd157,Dy163,Er166,Yb172,Lu175,Hf178,Pb204,Pb206,Pb207,Pb208,Th232,U238	gj1 - 5.d
/Users/224742i/Desktop/2019-06-10 GA UPb 7700/91500 - 9.csv	2019-06-10 22:17:18.000	2019-06-10 22:19:02.892	2022-02-28 11:04:03.757	200	22	Si29,Ca43,Ti49,Zr91,La139,Ce140,Pr141,Nd146,Sm147,Eu153,Gd157,Dy163,Er166,Yb172,Lu175,Hf178,Pb204,Pb206,Pb207,Pb208,Th232,U238	91500 - 9.d
/Users/224742i/Desktop/2019-06-10 GA UPb 7700/NTEM - 10.csv	2019-06-10 21:53:58.000	2019-06-10 21:55:42.893	2022-02-28 11:04:03.782	200	22	Si29,Ca43,Ti49,Zr91,La139,Ce140,Pr141,Nd146,Sm147,Eu153,Gd157,Dy163,Er166,Yb172,Lu175,Hf178,Pb204,Pb206,Pb207,Pb208,Th232,U238	NTEM - 10.d
/Users/224742i/Desktop/2019-06-10 GA UPb 7700/NOG1 - 12.csv	2019-06-11 00:46:59.000	2019-06-11 00:48:43.892	2022-02-28 11:04:03.835	200	22	Si29,Ca43,Ti49,Zr91,La139,Ce140,Pr141,Nd146,Sm147,Eu153,Gd157,Dy163,Er166,Yb172,Lu175,Hf178,Pb204,Pb206,Pb207,Pb208,Th232,U238	NOG1 - 12.d
/Users/224742i/Desktop/2019-06-10 GA UPb 7700/508 - 10.csv	2019-06-10 16:26:48.000	2019-06-10 16:28:32.893	2022-02-28 11:04:03.847	200	22	Si29,Ca43,Ti49,Zr91,La139,Ce140,Pr141,Nd146,Sm147,Eu153,Gd157,Dy163,Er166,Yb172,Lu175,Hf178,Pb204,Pb206,Pb207,Pb208,Th232,U238	508 - 10.d
/Users/224742i/Desktop/2019-06-10 GA UPb 7700/508 - 4.csv	2019-06-10 16:00:52.000	2019-06-10 16:02:36.893	2022-02-28 11:04:03.872	200	22	Si29,Ca43,Ti49,Zr91,La139,Ce140,Pr141,Nd146,Sm147,Eu153,Gd157,Dy163,Er166,Yb172,Lu175,Hf178,Pb204,Pb206,Pb207,Pb208,Th232,U238	508 - 4.d
/Users/224742i/Desktop/2019-06-10 GA UPb 7700/NQGN - 11.csv	2019-06-11 03:46:41.000	2019-06-11 03:48:25.891	2022-02-28 11:04:03.884	200	22	Si29,Ca43,Ti49,Zr91,La139,Ce140,Pr141,Nd146,Sm147,Eu153,Gd157,Dy163,Er166,Yb172,Lu175,Hf178,Pb204,Pb206,Pb207,Pb208,Th232,U238	NQGN - 11.d
/Users/224742i/Desktop/2019-06-10 GA UPb 7700/P1n - 8.csv	2019-06-11 03:01:36.000	2019-06-11 03:03:20.893	2022-02-28 11:04:03.908	200	22	Si29,Ca43,Ti49,Zr91,La139,Ce140,Pr141,Nd146,Sm147,Eu153,Gd157,Dy163,Er166,Yb172,Lu175,Hf178,Pb204,Pb206,Pb207,Pb208,Th232,U238	P1n - 8.d
/Users/224742i/Desktop/2019-06-10 GA UPb 7700/mud - 16.csv	2019-06-11 05:16:32.000	2019-06-11 05:18:16.893	2022-02-28 11:04:03.920	200	22	Si29,Ca43,Ti49,Zr91,La139,Ce140,Pr141,Nd146,Sm147,Eu153,Gd157,Dy163,Er166,Yb172,Lu175,Hf178,Pb204,Pb206,Pb207,Pb208,Th232,U238	mud - 16.d
/Users/224742i/Desktop/2019-06-10 GA UPb 7700/CQGN - 9.csv	2019-06-11 05:08:00.000	2019-06-11 05:09:44.893	2022-02-28 11:03:59.760	200	22	Si29,Ca43,Ti49,Zr91,La139,Ce140,Pr141,Nd146,Sm147,Eu153,Gd157,Dy163,Er166,Yb172,Lu175,Hf178,Pb204,Pb206,Pb207,Pb208,Th232,U238	CQGN - 9.d
/Users/224742i/Desktop/2019-06-10 GA UPb 7700/P1 - 1.csv	2019-06-10 14:17:30.000	2019-06-10 14:19:14.893	2022-02-28 11:04:03.928	200	22	Si29,Ca43,Ti49,Zr91,La139,Ce140,Pr141,Nd146,Sm147,Eu153,Gd157,Dy163,Er166,Yb172,Lu175,Hf178,Pb204,Pb206,Pb207,Pb208,Th232,U238	P1 - 1.d
/Users/224742i/Desktop/2019-06-10 GA UPb 7700/NTEM - 1.csv	2019-06-10 21:21:36.000	2019-06-10 21:23:20.893	2022-02-28 11:04:03.952	200	22	Si29,Ca43,Ti49,Zr91,La139,Ce140,Pr141,Nd146,Sm147,Eu153,Gd157,Dy163,Er166,Yb172,Lu175,Hf178,Pb204,Pb206,Pb207,Pb208,Th232,U238	NTEM - 1.d
/Users/224742i/Desktop/2019-06-10 GA UPb 7700/NQGN - 10.csv	2019-06-11 03:44:32.000	2019-06-11 03:46:16.893	2022-02-28 11:04:03.964	200	22	Si29,Ca43,Ti49,Zr91,La139,Ce140,Pr141,Nd146,Sm147,Eu153,Gd157,Dy163,Er166,Yb172,Lu175,Hf178,Pb204,Pb206,Pb207,Pb208,Th232,U238	NQGN - 10.d
/Users/224742i/Desktop/2019-06-10 GA UPb 7700/mud - 17.csv	2019-06-11 06:07:39.000	2019-06-11 06:09:23.893	2022-02-28 11:04:03.982	200	22	Si29,Ca43,Ti49,Zr91,La139,Ce140,Pr141,Nd146,Sm147,Eu153,Gd157,Dy163,Er166,Yb172,Lu175,Hf178,Pb204,Pb206,Pb207,Pb208,Th232,U238	mud - 17.d
/Users/224742i/Desktop/2019-06-10 GA UPb 7700/P1n - 9.csv	2019-06-11 04:50:48.000	2019-06-11 04:52:32.893	2022-02-28 11:04:04.005	200	22	Si29,Ca43,Ti49,Zr91,La139,Ce140,Pr141,Nd146,Sm147,Eu153,Gd157,Dy163,Er166,Yb172,Lu175,Hf178,Pb204,Pb206,Pb207,Pb208,Th232,U238	P1n - 9.d
/Users/224742i/Desktop/2019-06-10 GA UPb 7700/NQGN - 1.csv	2019-06-11 03:25:22.000	2019-06-11 03:27:06.893	2022-02-28 11:04:04.019	200	22	Si29,Ca43,Ti49,Zr91,La139,Ce140,Pr141,Nd146,Sm147,Eu153,Gd157,Dy163,Er166,Yb172,Lu175,Hf178,Pb204,Pb206,Pb207,Pb208,Th232,U238	NQGN - 1.d
/Users/224742i/Desktop/2019-06-10 GA UPb 7700/508 - 5.csv	2019-06-10 16:02:58.000	2019-06-10 16:04:42.893	2022-02-28 11:04:04.046	200	22	Si29,Ca43,Ti49,Zr91,La139,Ce140,Pr141,Nd146,Sm147,Eu153,Gd157,Dy163,Er166,Yb172,Lu175,Hf178,Pb204,Pb206,Pb207,Pb208,Th232,U238	508 - 5.d
/Users/224742i/Desktop/2019-06-10 GA UPb 7700/508 - 11.csv	2019-06-10 16:37:29.000	2019-06-10 16:39:13.893	2022-02-28 11:04:04.058	200	22	Si29,Ca43,Ti49,Zr91,La139,Ce140,Pr141,Nd146,Sm147,Eu153,Gd157,Dy163,Er166,Yb172,Lu175,Hf178,Pb204,Pb206,Pb207,Pb208,Th232,U238	508 - 11.d
/Users/224742i/Desktop/2019-06-10 GA UPb 7700/NOG1 - 13.csv	2019-06-11 00:49:04.000	2019-06-11 00:50:48.893	2022-02-28 11:04:04.070	200	22	Si29,Ca43,Ti49,Zr91,La139,Ce140,Pr141,Nd146,Sm147,Eu153,Gd157,Dy163,Er166,Yb172,Lu175,Hf178,Pb204,Pb206,Pb207,Pb208,Th232,U238	NOG1 - 13.d
/Users/224742i/Desktop/2019-06-10 GA UPb 7700/91500 - 8.csv	2019-06-10 21:12:56.000	2019-06-10 21:14:40.893	2022-02-28 11:04:04.094	200	22	Si29,Ca43,Ti49,Zr91,La139,Ce140,Pr141,Nd146,Sm147,Eu153,Gd157,Dy163,Er166,Yb172,Lu175,Hf178,Pb204,Pb206,Pb207,Pb208,Th232,U238	91500 - 8.d
/Users/224742i/Desktop/2019-06-10 GA UPb 7700/CTEM - 9.csv	2019-06-10 23:06:24.000	2019-06-10 23:08:08.893	2022-02-28 11:03:59.765	200	22	Si29,Ca43,Ti49,Zr91,La139,Ce140,Pr141,Nd146,Sm147,Eu153,Gd157,Dy163,Er166,Yb172,Lu175,Hf178,Pb204,Pb206,Pb207,Pb208,Th232,U238	CTEM - 9.d
/Users/224742i/Desktop/2019-06-10 GA UPb 7700/NTEM - 11.csv	2019-06-10 21:56:07.000	2019-06-10 21:57:51.893	2022-02-28 11:04:04.108	200	22	Si29,Ca43,Ti49,Zr91,La139,Ce140,Pr141,Nd146,Sm147,Eu153,Gd157,Dy163,Er166,Yb172,Lu175,Hf178,Pb204,Pb206,Pb207,Pb208,Th232,U238	NTEM - 11.d
/Users/224742i/Desktop/2019-06-10 GA UPb 7700/610 - 10.csv	2019-06-11 06:20:37.000	2019-06-11 06:22:21.893	2022-02-28 11:04:04.133	200	22	Si29,Ca43,Ti49,Zr91,La139,Ce140,Pr141,Nd146,Sm147,Eu153,Gd157,Dy163,Er166,Yb172,Lu175,Hf178,Pb204,Pb206,Pb207,Pb208,Th232,U238	610 - 10.d
/Users/224742i/Desktop/2019-06-10 GA UPb 7700/gj1 - 4.csv	2019-06-10 17:22:11.000	2019-06-10 17:23:55.892	2022-02-28 11:04:04.190	200	22	Si29,Ca43,Ti49,Zr91,La139,Ce140,Pr141,Nd146,Sm147,Eu153,Gd157,Dy163,Er166,Yb172,Lu175,Hf178,Pb204,Pb206,Pb207,Pb208,Th232,U238	gj1 - 4.d
/Users/224742i/Desktop/2019-06-10 GA UPb 7700/506 - 30.csv	2019-06-10 15:52:22.000	2019-06-10 15:54:06.892	2022-02-28 11:04:04.202	200	22	Si29,Ca43,Ti49,Zr91,La139,Ce140,Pr141,Nd146,Sm147,Eu153,Gd157,Dy163,Er166,Yb172,Lu175,Hf178,Pb204,Pb206,Pb207,Pb208,Th232,U238	506 - 30.d
/Users/224742i/Desktop/2019-06-10 GA UPb 7700/CTEM - 2.csv	2019-06-10 22:49:21.000	2019-06-10 22:51:05.893	2022-02-28 11:04:04.227	200	22	Si29,Ca43,Ti49,Zr91,La139,Ce140,Pr141,Nd146,Sm147,Eu153,Gd157,Dy163,Er166,Yb172,Lu175,Hf178,Pb204,Pb206,Pb207,Pb208,Th232,U238	CTEM - 2.d
/Users/224742i/Desktop/2019-06-10 GA UPb 7700/506 - 24.csv	2019-06-10 15:39:39.000	2019-06-10 15:41:23.893	2022-02-28 11:04:04.241	200	22	Si29,Ca43,Ti49,Zr91,La139,Ce140,Pr141,Nd146,Sm147,Eu153,Gd157,Dy163,Er166,Yb172,Lu175,Hf178,Pb204,Pb206,Pb207,Pb208,Th232,U238	506 - 24.d
/Users/224742i/Desktop/2019-06-10 GA UPb 7700/506 - 18.csv	2019-06-10 15:18:10.000	2019-06-10 15:19:54.893	2022-02-28 11:04:04.268	200	22	Si29,Ca43,Ti49,Zr91,La139,Ce140,Pr141,Nd146,Sm147,Eu153,Gd157,Dy163,Er166,Yb172,Lu175,Hf178,Pb204,Pb206,Pb207,Pb208,Th232,U238	506 - 18.d
/Users/224742i/Desktop/2019-06-10 GA UPb 7700/CQGN - 2.csv	2019-06-11 04:39:57.000	2019-06-11 04:41:41.893	2022-02-28 11:04:04.281	200	22	Si29,Ca43,Ti49,Zr91,La139,Ce140,Pr141,Nd146,Sm147,Eu153,Gd157,Dy163,Er166,Yb172,Lu175,Hf178,Pb204,Pb206,Pb207,Pb208,Th232,U238	CQGN - 2.d
/Users/224742i/Desktop/2019-06-10 GA UPb 7700/gj1 - 14.csv	2019-06-11 03:18:53.000	2019-06-11 03:20:37.893	2022-02-28 11:04:04.292	200	22	Si29,Ca43,Ti49,Zr91,La139,Ce140,Pr141,Nd146,Sm147,Eu153,Gd157,Dy163,Er166,Yb172,Lu175,Hf178,Pb204,Pb206,Pb207,Pb208,Th232,U238	gj1 - 14.d
/Users/224742i/Desktop/2019-06-10 GA UPb 7700/R33 - 7.csv	2019-06-10 20:28:15.000	2019-06-10 20:29:59.893	2022-02-28 11:04:04.317	200	22	Si29,Ca43,Ti49,Zr91,La139,Ce140,Pr141,Nd146,Sm147,Eu153,Gd157,Dy163,Er166,Yb172,Lu175,Hf178,Pb204,Pb206,Pb207,Pb208,Th232,U238	R33 - 7.d
/Users/224742i/Desktop/2019-06-10 GA UPb 7700/506 - 13.csv	2019-06-10 15:07:30.000	2019-06-10 15:09:14.893	2022-02-28 11:03:59.769	200	22	Si29,Ca43,Ti49,Zr91,La139,Ce140,Pr141,Nd146,Sm147,Eu153,Gd157,Dy163,Er166,Yb172,Lu175,Hf178,Pb204,Pb206,Pb207,Pb208,Th232,U238	506 - 13.d
/Users/224742i/Desktop/2019-06-10 GA UPb 7700/gj1 - 16.csv	2019-06-11 05:14:22.000	2019-06-11 05:16:06.893	2022-02-28 11:04:04.331	200	22	Si29,Ca43,Ti49,Zr91,La139,Ce140,Pr141,Nd146,Sm147,Eu153,Gd157,Dy163,Er166,Yb172,Lu175,Hf178,Pb204,Pb206,Pb207,Pb208,Th232,U238	gj1 - 16.d
/Users/224742i/Desktop/2019-06-10 GA UPb 7700/R33 - 5.csv	2019-06-10 18:30:38.000	2019-06-10 18:32:22.893	2022-02-28 11:04:04.364	200	22	Si29,Ca43,Ti49,Zr91,La139,Ce140,Pr141,Nd146,Sm147,Eu153,Gd157,Dy163,Er166,Yb172,Lu175,Hf178,Pb204,Pb206,Pb207,Pb208,Th232,U238	R33 - 5.d
/Users/224742i/Desktop/2019-06-10 GA UPb 7700/FC1 - 9.csv	2019-06-11 04:46:26.000	2019-06-11 04:48:10.893	2022-02-28 11:04:04.376	200	22	Si29,Ca43,Ti49,Zr91,La139,Ce140,Pr141,Nd146,Sm147,Eu153,Gd157,Dy163,Er166,Yb172,Lu175,Hf178,Pb204,Pb206,Pb207,Pb208,Th232,U238	FC1 - 9.d
/Users/224742i/Desktop/2019-06-10 GA UPb 7700/506 - 26.csv	2019-06-10 15:43:53.000	2019-06-10 15:45:37.893	2022-02-28 11:04:04.391	200	22	Si29,Ca43,Ti49,Zr91,La139,Ce140,Pr141,Nd146,Sm147,Eu153,Gd157,Dy163,Er166,Yb172,Lu175,Hf178,Pb204,Pb206,Pb207,Pb208,Th232,U238	506 - 26.d
/Users/224742i/Desktop/2019-06-10 GA UPb 7700/610 - 9.csv	2019-06-11 04:42:05.000	2019-06-11 04:43:49.893	2022-02-28 11:04:04.417	200	22	Si29,Ca43,Ti49,Zr91,La139,Ce140,Pr141,Nd146,Sm147,Eu153,Gd157,Dy163,Er166,Yb172,Lu175,Hf178,Pb204,Pb206,Pb207,Pb208,Th232,U238	610 - 9.d
/Users/224742i/Desktop/2019-06-10 GA UPb 7700/gj1 - 6.csv	2019-06-10 19:19:41.000	2019-06-10 19:21:25.893	2022-02-28 11:04:04.432	200	22	Si29,Ca43,Ti49,Zr91,La139,Ce140,Pr141,Nd146,Sm147,Eu153,Gd157,Dy163,Er166,Yb172,Lu175,Hf178,Pb204,Pb206,Pb207,Pb208,Th232,U238	gj1 - 6.d
/Users/224742i/Desktop/2019-06-10 GA UPb 7700/NTEM - 13.csv	2019-06-10 22:00:21.000	2019-06-10 22:02:05.893	2022-02-28 11:04:04.444	200	22	Si29,Ca43,Ti49,Zr91,La139,Ce140,Pr141,Nd146,Sm147,Eu153,Gd157,Dy163,Er166,Yb172,Lu175,Hf178,Pb204,Pb206,Pb207,Pb208,Th232,U238	NTEM - 13.d
/Users/224742i/Desktop/2019-06-10 GA UPb 7700/NOG1 - 11.csv	2019-06-11 00:44:51.000	2019-06-11 00:46:35.893	2022-02-28 11:04:04.469	200	22	Si29,Ca43,Ti49,Zr91,La139,Ce140,Pr141,Nd146,Sm147,Eu153,Gd157,Dy163,Er166,Yb172,Lu175,Hf178,Pb204,Pb206,Pb207,Pb208,Th232,U238	NOG1 - 11.d
/Users/224742i/Desktop/2019-06-10 GA UPb 7700/ogc - 8.csv	2019-06-11 02:59:24.000	2019-06-11 03:01:08.893	2022-02-28 11:04:04.481	200	22	Si29,Ca43,Ti49,Zr91,La139,Ce140,Pr141,Nd146,Sm147,Eu153,Gd157,Dy163,Er166,Yb172,Lu175,Hf178,Pb204,Pb206,Pb207,Pb208,Th232,U238	ogc - 8.d
/Users/224742i/Desktop/2019-06-10 GA UPb 7700/508 - 13.csv	2019-06-10 16:41:52.000	2019-06-10 16:43:36.893	2022-02-28 11:04:04.508	200	22	Si29,Ca43,Ti49,Zr91,La139,Ce140,Pr141,Nd146,Sm147,Eu153,Gd157,Dy163,Er166,Yb172,Lu175,Hf178,Pb204,Pb206,Pb207,Pb208,Th232,U238	508 - 13.d
/Users/224742i/Desktop/2019-06-10 GA UPb 7700/91500 - 3.csv	2019-06-10 16:28:53.000	2019-06-10 16:30:37.893	2022-02-28 11:03:59.773	200	22	Si29,Ca43,Ti49,Zr91,La139,Ce140,Pr141,Nd146,Sm147,Eu153,Gd157,Dy163,Er166,Yb172,Lu175,Hf178,Pb204,Pb206,Pb207,Pb208,Th232,U238	91500 - 3.d
/Users/224742i/Desktop/2019-06-10 GA UPb 7700/508 - 7.csv	2019-06-10 16:20:19.000	2019-06-10 16:22:03.893	2022-02-28 11:04:04.563	200	22	Si29,Ca43,Ti49,Zr91,La139,Ce140,Pr141,Nd146,Sm147,Eu153,Gd157,Dy163,Er166,Yb172,Lu175,Hf178,Pb204,Pb206,Pb207,Pb208,Th232,U238	508 - 7.d
/Users/224742i/Desktop/2019-06-10 GA UPb 7700/mud - 15.csv	2019-06-11 04:12:12.000	2019-06-11 04:13:56.893	2022-02-28 11:04:04.575	200	22	Si29,Ca43,Ti49,Zr91,La139,Ce140,Pr141,Nd146,Sm147,Eu153,Gd157,Dy163,Er166,Yb172,Lu175,Hf178,Pb204,Pb206,Pb207,Pb208,Th232,U238	mud - 15.d
/Users/224742i/Desktop/2019-06-10 GA UPb 7700/NQGN - 12.csv	2019-06-11 03:48:47.000	2019-06-11 03:50:31.893	2022-02-28 11:04:04.601	200	22	Si29,Ca43,Ti49,Zr91,La139,Ce140,Pr141,Nd146,Sm147,Eu153,Gd157,Dy163,Er166,Yb172,Lu175,Hf178,Pb204,Pb206,Pb207,Pb208,Th232,U238	NQGN - 12.d
/Users/224742i/Desktop/2019-06-10 GA UPb 7700/NQGN - 3.csv	2019-06-11 03:29:44.000	2019-06-11 03:31:28.893	2022-02-28 11:04:04.613	200	22	Si29,Ca43,Ti49,Zr91,La139,Ce140,Pr141,Nd146,Sm147,Eu153,Gd157,Dy163,Er166,Yb172,Lu175,Hf178,Pb204,Pb206,Pb207,Pb208,Th232,U238	NQGN - 3.d
/Users/224742i/Desktop/2019-06-10 GA UPb 7700/P1 - 2.csv	2019-06-10 18:37:07.000	2019-06-10 18:38:51.893	2022-02-28 11:04:04.640	200	22	Si29,Ca43,Ti49,Zr91,La139,Ce140,Pr141,Nd146,Sm147,Eu153,Gd157,Dy163,Er166,Yb172,Lu175,Hf178,Pb204,Pb206,Pb207,Pb208,Th232,U238	P1 - 2.d
/Users/224742i/Desktop/2019-06-10 GA UPb 7700/NTEM - 3.csv	2019-06-10 21:25:59.000	2019-06-10 21:27:43.893	2022-02-28 11:04:04.653	200	22	Si29,Ca43,Ti49,Zr91,La139,Ce140,Pr141,Nd146,Sm147,Eu153,Gd157,Dy163,Er166,Yb172,Lu175,Hf178,Pb204,Pb206,Pb207,Pb208,Th232,U238	NTEM - 3.d
/Users/224742i/Desktop/2019-06-10 GA UPb 7700/NTEM - 2.csv	2019-06-10 21:23:49.000	2019-06-10 21:25:33.893	2022-02-28 11:04:04.667	200	22	Si29,Ca43,Ti49,Zr91,La139,Ce140,Pr141,Nd146,Sm147,Eu153,Gd157,Dy163,Er166,Yb172,Lu175,Hf178,Pb204,Pb206,Pb207,Pb208,Th232,U238	NTEM - 2.d
/Users/224742i/Desktop/2019-06-10 GA UPb 7700/P1 - 3.csv	2019-06-10 22:55:44.000	2019-06-10 22:57:28.893	2022-02-28 11:04:04.693	200	22	Si29,Ca43,Ti49,Zr91,La139,Ce140,Pr141,Nd146,Sm147,Eu153,Gd157,Dy163,Er166,Yb172,Lu175,Hf178,Pb204,Pb206,Pb207,Pb208,Th232,U238	P1 - 3.d
/Users/224742i/Desktop/2019-06-10 GA UPb 7700/NQGN - 2.csv	2019-06-11 03:27:36.000	2019-06-11 03:29:20.893	2022-02-28 11:04:04.706	200	22	Si29,Ca43,Ti49,Zr91,La139,Ce140,Pr141,Nd146,Sm147,Eu153,Gd157,Dy163,Er166,Yb172,Lu175,Hf178,Pb204,Pb206,Pb207,Pb208,Th232,U238	NQGN - 2.d
/Users/224742i/Desktop/2019-06-10 GA UPb 7700/mud - 14.csv	2019-06-11 03:21:02.000	2019-06-11 03:22:46.893	2022-02-28 11:04:04.738	200	22	Si29,Ca43,Ti49,Zr91,La139,Ce140,Pr141,Nd146,Sm147,Eu153,Gd157,Dy163,Er166,Yb172,Lu175,Hf178,Pb204,Pb206,Pb207,Pb208,Th232,U238	mud - 14.d
/Users/224742i/Desktop/2019-06-10 GA UPb 7700/NTEM - 26.csv	2019-06-10 22:36:38.000	2019-06-10 22:38:22.893	2022-02-28 11:03:59.821	200	22	Si29,Ca43,Ti49,Zr91,La139,Ce140,Pr141,Nd146,Sm147,Eu153,Gd157,Dy163,Er166,Yb172,Lu175,Hf178,Pb204,Pb206,Pb207,Pb208,Th232,U238	NTEM - 26.d
/Users/224742i/Desktop/2019-06-10 GA UPb 7700/NQGN - 13.csv	2019-06-11 03:50:55.000	2019-06-11 03:52:39.893	2022-02-28 11:04:04.752	200	22	Si29,Ca43,Ti49,Zr91,La139,Ce140,Pr141,Nd146,Sm147,Eu153,Gd157,Dy163,Er166,Yb172,Lu175,Hf178,Pb204,Pb206,Pb207,Pb208,Th232,U238	NQGN - 13.d
/Users/224742i/Desktop/2019-06-10 GA UPb 7700/508 - 6.csv	2019-06-10 16:05:07.000	2019-06-10 16:06:51.893	2022-02-28 11:04:04.765	200	22	Si29,Ca43,Ti49,Zr91,La139,Ce140,Pr141,Nd146,Sm147,Eu153,Gd157,Dy163,Er166,Yb172,Lu175,Hf178,Pb204,Pb206,Pb207,Pb208,Th232,U238	508 - 6.d
/Users/224742i/Desktop/2019-06-10 GA UPb 7700/ogc - 9.csv	2019-06-11 04:48:32.000	2019-06-11 04:50:16.893	2022-02-28 11:04:04.790	200	22	Si29,Ca43,Ti49,Zr91,La139,Ce140,Pr141,Nd146,Sm147,Eu153,Gd157,Dy163,Er166,Yb172,Lu175,Hf178,Pb204,Pb206,Pb207,Pb208,Th232,U238	ogc - 9.d
/Users/224742i/Desktop/2019-06-10 GA UPb 7700/508 - 12.csv	2019-06-10 16:39:45.000	2019-06-10 16:41:29.892	2022-02-28 11:04:04.804	200	22	Si29,Ca43,Ti49,Zr91,La139,Ce140,Pr141,Nd146,Sm147,Eu153,Gd157,Dy163,Er166,Yb172,Lu175,Hf178,Pb204,Pb206,Pb207,Pb208,Th232,U238	508 - 12.d
/Users/224742i/Desktop/2019-06-10 GA UPb 7700/NOG1 - 10.csv	2019-06-11 00:42:45.000	2019-06-11 00:44:29.893	2022-02-28 11:04:04.817	200	22	Si29,Ca43,Ti49,Zr91,La139,Ce140,Pr141,Nd146,Sm147,Eu153,Gd157,Dy163,Er166,Yb172,Lu175,Hf178,Pb204,Pb206,Pb207,Pb208,Th232,U238	NOG1 - 10.d
/Users/224742i/Desktop/2019-06-10 GA UPb 7700/NTEM - 12.csv	2019-06-10 21:58:12.000	2019-06-10 21:59:56.893	2022-02-28 11:04:04.843	200	22	Si29,Ca43,Ti49,Zr91,La139,Ce140,Pr141,Nd146,Sm147,Eu153,Gd157,Dy163,Er166,Yb172,Lu175,Hf178,Pb204,Pb206,Pb207,Pb208,Th232,U238	NTEM - 12.d
/Users/224742i/Desktop/2019-06-10 GA UPb 7700/gj1 - 7.csv	2019-06-10 20:24:01.000	2019-06-10 20:25:45.893	2022-02-28 11:04:04.859	200	22	Si29,Ca43,Ti49,Zr91,La139,Ce140,Pr141,Nd146,Sm147,Eu153,Gd157,Dy163,Er166,Yb172,Lu175,Hf178,Pb204,Pb206,Pb207,Pb208,Th232,U238	gj1 - 7.d
/Users/224742i/Desktop/2019-06-10 GA UPb 7700/610 - 8.csv	2019-06-11 02:52:54.000	2019-06-11 02:54:38.893	2022-02-28 11:04:04.887	200	22	Si29,Ca43,Ti49,Zr91,La139,Ce140,Pr141,Nd146,Sm147,Eu153,Gd157,Dy163,Er166,Yb172,Lu175,Hf178,Pb204,Pb206,Pb207,Pb208,Th232,U238	610 - 8.d
/Users/224742i/Desktop/2019-06-10 GA UPb 7700/CTEM - 1.csv	2019-06-10 22:47:16.000	2019-06-10 22:49:00.893	2022-02-28 11:04:04.942	200	22	Si29,Ca43,Ti49,Zr91,La139,Ce140,Pr141,Nd146,Sm147,Eu153,Gd157,Dy163,Er166,Yb172,Lu175,Hf178,Pb204,Pb206,Pb207,Pb208,Th232,U238	CTEM - 1.d
/Users/224742i/Desktop/2019-06-10 GA UPb 7700/506 - 27.csv	2019-06-10 15:45:58.000	2019-06-10 15:47:42.893	2022-02-28 11:04:04.955	200	22	Si29,Ca43,Ti49,Zr91,La139,Ce140,Pr141,Nd146,Sm147,Eu153,Gd157,Dy163,Er166,Yb172,Lu175,Hf178,Pb204,Pb206,Pb207,Pb208,Th232,U238	506 - 27.d
/Users/224742i/Desktop/2019-06-10 GA UPb 7700/NOG1 - 24.csv	2019-06-11 01:34:17.000	2019-06-11 01:36:01.893	2022-02-28 11:03:59.827	200	22	Si29,Ca43,Ti49,Zr91,La139,Ce140,Pr141,Nd146,Sm147,Eu153,Gd157,Dy163,Er166,Yb172,Lu175,Hf178,Pb204,Pb206,Pb207,Pb208,Th232,U238	NOG1 - 24.d
/Users/224742i/Desktop/2019-06-10 GA UPb 7700/CQGN - 1.csv	2019-06-11 04:37:52.000	2019-06-11 04:39:36.893	2022-02-28 11:04:04.981	200	22	Si29,Ca43,Ti49,Zr91,La139,Ce140,Pr141,Nd146,Sm147,Eu153,Gd157,Dy163,Er166,Yb172,Lu175,Hf178,Pb204,Pb206,Pb207,Pb208,Th232,U238	CQGN - 1.d
/Users/224742i/Desktop/2019-06-10 GA UPb 7700/FC1 - 8.csv	2019-06-11 02:57:13.000	2019-06-11 02:58:57.892	2022-02-28 11:04:04.993	200	22	Si29,Ca43,Ti49,Zr91,La139,Ce140,Pr141,Nd146,Sm147,Eu153,Gd157,Dy163,Er166,Yb172,Lu175,Hf178,Pb204,Pb206,Pb207,Pb208,Th232,U238	FC1 - 8.d
/Users/224742i/Desktop/2019-06-10 GA UPb 7700/R33 - 4.csv	2019-06-10 17:26:27.000	2019-06-10 17:28:11.893	2022-02-28 11:04:05.021	200	22	Si29,Ca43,Ti49,Zr91,La139,Ce140,Pr141,Nd146,Sm147,Eu153,Gd157,Dy163,Er166,Yb172,Lu175,Hf178,Pb204,Pb206,Pb207,Pb208,Th232,U238	R33 - 4.d
/Users/224742i/Desktop/2019-06-10 GA UPb 7700/gj1 - 17.csv	2019-06-11 06:05:30.000	2019-06-11 06:07:14.893	2022-02-28 11:04:05.035	200	22	Si29,Ca43,Ti49,Zr91,La139,Ce140,Pr141,Nd146,Sm147,Eu153,Gd157,Dy163,Er166,Yb172,Lu175,Hf178,Pb204,Pb206,Pb207,Pb208,Th232,U238	gj1 - 17.d
/Users/224742i/Desktop/2019-06-10 GA UPb 7700/CQGN - 5.csv	2019-06-11 04:59:31.000	2019-06-11 05:01:15.893	2022-02-28 11:04:05.048	200	22	Si29,Ca43,Ti49,Zr91,La139,Ce140,Pr141,Nd146,Sm147,Eu153,Gd157,Dy163,Er166,Yb172,Lu175,Hf178,Pb204,Pb206,Pb207,Pb208,Th232,U238	CQGN - 5.d
/Users/224742i/Desktop/2019-06-10 GA UPb 7700/gj1 - 13.csv	2019-06-11 02:12:29.000	2019-06-11 02:14:13.893	2022-02-28 11:04:05.076	200	22	Si29,Ca43,Ti49,Zr91,La139,Ce140,Pr141,Nd146,Sm147,Eu153,Gd157,Dy163,Er166,Yb172,Lu175,Hf178,Pb204,Pb206,Pb207,Pb208,Th232,U238	gj1 - 13.d
/Users/224742i/Desktop/2019-06-10 GA UPb 7700/506 - 23.csv	2019-06-10 15:37:29.000	2019-06-10 15:39:13.893	2022-02-28 11:04:05.090	200	22	Si29,Ca43,Ti49,Zr91,La139,Ce140,Pr141,Nd146,Sm147,Eu153,Gd157,Dy163,Er166,Yb172,Lu175,Hf178,Pb204,Pb206,Pb207,Pb208,Th232,U238	506 - 23.d
/Users/224742i/Desktop/2019-06-10 GA UPb 7700/CTEM - 5.csv	2019-06-10 22:57:54.000	2019-06-10 22:59:38.893	2022-02-28 11:04:05.125	200	22	Si29,Ca43,Ti49,Zr91,La139,Ce140,Pr141,Nd146,Sm147,Eu153,Gd157,Dy163,Er166,Yb172,Lu175,Hf178,Pb204,Pb206,Pb207,Pb208,Th232,U238	CTEM - 5.d
/Users/224742i/Desktop/2019-06-10 GA UPb 7700/gj1 - 3.csv	2019-06-10 16:31:05.000	2019-06-10 16:32:49.892	2022-02-28 11:04:05.139	200	22	Si29,Ca43,Ti49,Zr91,La139,Ce140,Pr141,Nd146,Sm147,Eu153,Gd157,Dy163,Er166,Yb172,Lu175,Hf178,Pb204,Pb206,Pb207,Pb208,Th232,U238	gj1 - 3.d
/Users/224742i/Desktop/2019-06-10 GA UPb 7700/NTEM - 16.csv	2019-06-10 22:06:41.000	2019-06-10 22:08:25.893	2022-02-28 11:04:05.152	200	22	Si29,Ca43,Ti49,Zr91,La139,Ce140,Pr141,Nd146,Sm147,Eu153,Gd157,Dy163,Er166,Yb172,Lu175,Hf178,Pb204,Pb206,Pb207,Pb208,Th232,U238	NTEM - 16.d
/Users/224742i/Desktop/2019-06-10 GA UPb 7700/610 - 3.csv	2019-06-10 17:54:07.000	2019-06-10 17:55:51.893	2022-02-28 11:03:59.563	200	22	Si29,Ca43,Ti49,Zr91,La139,Ce140,Pr141,Nd146,Sm147,Eu153,Gd157,Dy163,Er166,Yb172,Lu175,Hf178,Pb204,Pb206,Pb207,Pb208,Th232,U238	610 - 3.d
/Users/224742i/Desktop/2019-06-10 GA UPb 7700/NOG1 - 30.csv	2019-06-11 01:46:59.000	2019-06-11 01:48:43.891	2022-02-28 11:03:59.831	200	22	Si29,Ca43,Ti49,Zr91,La139,Ce140,Pr141,Nd146,Sm147,Eu153,Gd157,Dy163,Er166,Yb172,Lu175,Hf178,Pb204,Pb206,Pb207,Pb208,Th232,U238	NOG1 - 30.d
/Users/224742i/Desktop/2019-06-10 GA UPb 7700/508 - 16.csv	2019-06-10 16:48:16.000	2019-06-10 16:50:00.893	2022-02-28 11:04:05.181	200	22	Si29,Ca43,Ti49,Zr91,La139,Ce140,Pr141,Nd146,Sm147,Eu153,Gd157,Dy163,Er166,Yb172,Lu175,Hf178,Pb204,Pb206,Pb207,Pb208,Th232,U238	508 - 16.d
/Users/224742i/Desktop/2019-06-10 GA UPb 7700/NOG1 - 28.csv	2019-06-11 01:42:45.000	2019-06-11 01:44:29.893	2022-02-28 11:04:05.194	200	22	Si29,Ca43,Ti49,Zr91,La139,Ce140,Pr141,Nd146,Sm147,Eu153,Gd157,Dy163,Er166,Yb172,Lu175,Hf178,Pb204,Pb206,Pb207,Pb208,Th232,U238	NOG1 - 28.d
/Users/224742i/Desktop/2019-06-10 GA UPb 7700/NOG1 - 14.csv	2019-06-11 00:51:15.000	2019-06-11 00:52:59.893	2022-02-28 11:04:05.221	200	22	Si29,Ca43,Ti49,Zr91,La139,Ce140,Pr141,Nd146,Sm147,Eu153,Gd157,Dy163,Er166,Yb172,Lu175,Hf178,Pb204,Pb206,Pb207,Pb208,Th232,U238	NOG1 - 14.d
/Users/224742i/Desktop/2019-06-10 GA UPb 7700/NQGN - 17.csv	2019-06-11 03:59:25.000	2019-06-11 04:01:09.893	2022-02-28 11:04:05.234	200	22	Si29,Ca43,Ti49,Zr91,La139,Ce140,Pr141,Nd146,Sm147,Eu153,Gd157,Dy163,Er166,Yb172,Lu175,Hf178,Pb204,Pb206,Pb207,Pb208,Th232,U238	NQGN - 17.d
/Users/224742i/Desktop/2019-06-10 GA UPb 7700/mud - 10.csv	2019-06-10 23:14:57.000	2019-06-10 23:16:41.893	2022-02-28 11:04:05.247	200	22	Si29,Ca43,Ti49,Zr91,La139,Ce140,Pr141,Nd146,Sm147,Eu153,Gd157,Dy163,Er166,Yb172,Lu175,Hf178,Pb204,Pb206,Pb207,Pb208,Th232,U238	mud - 10.d
/Users/224742i/Desktop/2019-06-10 GA UPb 7700/NQGN - 6.csv	2019-06-11 03:36:05.000	2019-06-11 03:37:49.893	2022-02-28 11:04:05.274	200	22	Si29,Ca43,Ti49,Zr91,La139,Ce140,Pr141,Nd146,Sm147,Eu153,Gd157,Dy163,Er166,Yb172,Lu175,Hf178,Pb204,Pb206,Pb207,Pb208,Th232,U238	NQGN - 6.d
/Users/224742i/Desktop/2019-06-10 GA UPb 7700/508 - 2.csv	2019-06-10 15:56:38.000	2019-06-10 15:58:22.893	2022-02-28 11:04:05.330	200	22	Si29,Ca43,Ti49,Zr91,La139,Ce140,Pr141,Nd146,Sm147,Eu153,Gd157,Dy163,Er166,Yb172,Lu175,Hf178,Pb204,Pb206,Pb207,Pb208,Th232,U238	508 - 2.d
/Users/224742i/Desktop/2019-06-10 GA UPb 7700/FC1 - 10.csv	2019-06-11 06:24:58.000	2019-06-11 06:26:42.893	2022-02-28 11:04:05.342	200	22	Si29,Ca43,Ti49,Zr91,La139,Ce140,Pr141,Nd146,Sm147,Eu153,Gd157,Dy163,Er166,Yb172,Lu175,Hf178,Pb204,Pb206,Pb207,Pb208,Th232,U238	FC1 - 10.d
/Users/224742i/Desktop/2019-06-10 GA UPb 7700/NTEM - 6.csv	2019-06-10 21:45:30.000	2019-06-10 21:47:14.893	2022-02-28 11:04:05.370	200	22	Si29,Ca43,Ti49,Zr91,La139,Ce140,Pr141,Nd146,Sm147,Eu153,Gd157,Dy163,Er166,Yb172,Lu175,Hf178,Pb204,Pb206,Pb207,Pb208,Th232,U238	NTEM - 6.d
/Users/224742i/Desktop/2019-06-10 GA UPb 7700/NTEM - 7.csv	2019-06-10 21:47:39.000	2019-06-10 21:49:23.893	2022-02-28 11:04:05.385	200	22	Si29,Ca43,Ti49,Zr91,La139,Ce140,Pr141,Nd146,Sm147,Eu153,Gd157,Dy163,Er166,Yb172,Lu175,Hf178,Pb204,Pb206,Pb207,Pb208,Th232,U238	NTEM - 7.d
/Users/224742i/Desktop/2019-06-10 GA UPb 7700/ogc - 1.csv	2019-06-10 14:26:42.000	2019-06-10 14:28:26.893	2022-02-28 11:03:59.836	200	22	Si29,Ca43,Ti49,Zr91,La139,Ce140,Pr141,Nd146,Sm147,Eu153,Gd157,Dy163,Er166,Yb172,Lu175,Hf178,Pb204,Pb206,Pb207,Pb208,Th232,U238	ogc - 1.d
/Users/224742i/Desktop/2019-06-10 GA UPb 7700/508 - 3.csv	2019-06-10 15:58:43.000	2019-06-10 16:00:27.893	2022-02-28 11:04:05.416	200	22	Si29,Ca43,Ti49,Zr91,La139,Ce140,Pr141,Nd146,Sm147,Eu153,Gd157,Dy163,Er166,Yb172,Lu175,Hf178,Pb204,Pb206,Pb207,Pb208,Th232,U238	508 - 3.d
/Users/224742i/Desktop/2019-06-10 GA UPb 7700/NQGN - 7.csv	2019-06-11 03:38:14.000	2019-06-11 03:39:58.893	2022-02-28 11:04:05.429	200	22	Si29,Ca43,Ti49,Zr91,La139,Ce140,Pr141,Nd146,Sm147,Eu153,Gd157,Dy163,Er166,Yb172,Lu175,Hf178,Pb204,Pb206,Pb207,Pb208,Th232,U238	NQGN - 7.d
/Users/224742i/Desktop/2019-06-10 GA UPb 7700/NQGN - 16.csv	2019-06-11 03:57:16.000	2019-06-11 03:59:00.892	2022-02-28 11:04:05.442	200	22	Si29,Ca43,Ti49,Zr91,La139,Ce140,Pr141,Nd146,Sm147,Eu153,Gd157,Dy163,Er166,Yb172,Lu175,Hf178,Pb204,Pb206,Pb207,Pb208,Th232,U238	NQGN - 16.d
/Users/224742i/Desktop/2019-06-10 GA UPb 7700/mud - 11.csv	2019-06-11 00:19:11.000	2019-06-11 00:20:55.893	2022-02-28 11:04:05.470	200	22	Si29,Ca43,Ti49,Zr91,La139,Ce140,Pr141,Nd146,Sm147,Eu153,Gd157,Dy163,Er166,Yb172,Lu175,Hf178,Pb204,Pb206,Pb207,Pb208,Th232,U238	mud - 11.d
/Users/224742i/Desktop/2019-06-10 GA UPb 7700/NOG1 - 15.csv	2019-06-11 00:53:19.000	2019-06-11 00:55:03.893	2022-02-28 11:04:05.484	200	22	Si29,Ca43,Ti49,Zr91,La139,Ce140,Pr141,Nd146,Sm147,Eu153,Gd157,Dy163,Er166,Yb172,Lu175,Hf178,Pb204,Pb206,Pb207,Pb208,Th232,U238	NOG1 - 15.d
/Users/224742i/Desktop/2019-06-10 GA UPb 7700/NOG1 - 29.csv	2019-06-11 01:44:50.000	2019-06-11 01:46:34.893	2022-02-28 11:04:05.519	200	22	Si29,Ca43,Ti49,Zr91,La139,Ce140,Pr141,Nd146,Sm147,Eu153,Gd157,Dy163,Er166,Yb172,Lu175,Hf178,Pb204,Pb206,Pb207,Pb208,Th232,U238	NOG1 - 29.d
/Users/224742i/Desktop/2019-06-10 GA UPb 7700/508 - 17.csv	2019-06-10 16:50:22.000	2019-06-10 16:52:06.893	2022-02-28 11:04:05.534	200	22	Si29,Ca43,Ti49,Zr91,La139,Ce140,Pr141,Nd146,Sm147,Eu153,Gd157,Dy163,Er166,Yb172,Lu175,Hf178,Pb204,Pb206,Pb207,Pb208,Th232,U238	508 - 17.d
/Users/224742i/Desktop/2019-06-10 GA UPb 7700/NTEM - 17.csv	2019-06-10 22:08:51.000	2019-06-10 22:10:35.893	2022-02-28 11:04:05.548	200	22	Si29,Ca43,Ti49,Zr91,La139,Ce140,Pr141,Nd146,Sm147,Eu153,Gd157,Dy163,Er166,Yb172,Lu175,Hf178,Pb204,Pb206,Pb207,Pb208,Th232,U238	NTEM - 17.d
/Users/224742i/Desktop/2019-06-10 GA UPb 7700/gj1 - 2.csv	2019-06-10 15:26:41.000	2019-06-10 15:28:25.893	2022-02-28 11:04:05.578	200	22	Si29,Ca43,Ti49,Zr91,La139,Ce140,Pr141,Nd146,Sm147,Eu153,Gd157,Dy163,Er166,Yb172,Lu175,Hf178,Pb204,Pb206,Pb207,Pb208,Th232,U238	gj1 - 2.d
/Users/224742i/Desktop/2019-06-10 GA UPb 7700/CTEM - 4.csv	2019-06-10 22:53:35.000	2019-06-10 22:55:19.893	2022-02-28 11:04:05.592	200	22	Si29,Ca43,Ti49,Zr91,La139,Ce140,Pr141,Nd146,Sm147,Eu153,Gd157,Dy163,Er166,Yb172,Lu175,Hf178,Pb204,Pb206,Pb207,Pb208,Th232,U238	CTEM - 4.d
/Users/224742i/Desktop/2019-06-10 GA UPb 7700/NOG1 - 18.csv	2019-06-11 00:59:42.000	2019-06-11 01:01:26.893	2022-02-28 11:03:59.841	200	22	Si29,Ca43,Ti49,Zr91,La139,Ce140,Pr141,Nd146,Sm147,Eu153,Gd157,Dy163,Er166,Yb172,Lu175,Hf178,Pb204,Pb206,Pb207,Pb208,Th232,U238	NOG1 - 18.d
/Users/224742i/Desktop/2019-06-10 GA UPb 7700/506 - 22.csv	2019-06-10 15:35:23.000	2019-06-10 15:37:07.893	2022-02-28 11:04:05.622	200	22	Si29,Ca43,Ti49,Zr91,La139,Ce140,Pr141,Nd146,Sm147,Eu153,Gd157,Dy163,Er166,Yb172,Lu175,Hf178,Pb204,Pb206,Pb207,Pb208,Th232,U238	506 - 22.d
/Users/224742i/Desktop/2019-06-10 GA UPb 7700/R33 - 1.csv	2019-06-10 14:39:46.000	2019-06-10 14:41:30.893	2022-02-28 11:04:05.637	200	22	Si29,Ca43,Ti49,Zr91,La139,Ce140,Pr141,Nd146,Sm147,Eu153,Gd157,Dy163,Er166,Yb172,Lu175,Hf178,Pb204,Pb206,Pb207,Pb208,Th232,U238	R33 - 1.d
/Users/224742i/Desktop/2019-06-10 GA UPb 7700/gj1 - 12.csv	2019-06-11 01:21:19.000	2019-06-11 01:23:03.893	2022-02-28 11:04:05.650	200	22	Si29,Ca43,Ti49,Zr91,La139,Ce140,Pr141,Nd146,Sm147,Eu153,Gd157,Dy163,Er166,Yb172,Lu175,Hf178,Pb204,Pb206,Pb207,Pb208,Th232,U238	gj1 - 12.d
/Users/224742i/Desktop/2019-06-10 GA UPb 7700/CQGN - 4.csv	2019-06-11 04:57:22.000	2019-06-11 04:59:06.893	2022-02-28 11:04:05.679	200	22	Si29,Ca43,Ti49,Zr91,La139,Ce140,Pr141,Nd146,Sm147,Eu153,Gd157,Dy163,Er166,Yb172,Lu175,Hf178,Pb204,Pb206,Pb207,Pb208,Th232,U238	CQGN - 4.d
/Users/224742i/Desktop/2019-06-10 GA UPb 7700/CQGN - 6.csv	2019-06-11 05:01:36.000	2019-06-11 05:03:20.893	2022-02-28 11:04:05.733	200	22	Si29,Ca43,Ti49,Zr91,La139,Ce140,Pr141,Nd146,Sm147,Eu153,Gd157,Dy163,Er166,Yb172,Lu175,Hf178,Pb204,Pb206,Pb207,Pb208,Th232,U238	CQGN - 6.d
/Users/224742i/Desktop/2019-06-10 GA UPb 7700/R33 - 3.csv	2019-06-10 16:35:21.000	2019-06-10 16:37:05.893	2022-02-28 11:04:05.763	200	22	Si29,Ca43,Ti49,Zr91,La139,Ce140,Pr141,Nd146,Sm147,Eu153,Gd157,Dy163,Er166,Yb172,Lu175,Hf178,Pb204,Pb206,Pb207,Pb208,Th232,U238	R33 - 3.d
/Users/224742i/Desktop/2019-06-10 GA UPb 7700/gj1 - 10.csv	2019-06-10 23:12:52.000	2019-06-10 23:14:36.893	2022-02-28 11:04:05.777	200	22	Si29,Ca43,Ti49,Zr91,La139,Ce140,Pr141,Nd146,Sm147,Eu153,Gd157,Dy163,Er166,Yb172,Lu175,Hf178,Pb204,Pb206,Pb207,Pb208,Th232,U238	gj1 - 10.d
/Users/224742i/Desktop/2019-06-10 GA UPb 7700/506 - 20.csv	2019-06-10 15:22:24.000	2019-06-10 15:24:08.893	2022-02-28 11:04:05.793	200	22	Si29,Ca43,Ti49,Zr91,La139,Ce140,Pr141,Nd146,Sm147,Eu153,Gd157,Dy163,Er166,Yb172,Lu175,Hf178,Pb204,Pb206,Pb207,Pb208,Th232,U238	506 - 20.d
/Users/224742i/Desktop/2019-06-10 GA UPb 7700/CTEM - 6.csv	2019-06-10 23:00:05.000	2019-06-10 23:01:49.893	2022-02-28 11:04:05.824	200	22	Si29,Ca43,Ti49,Zr91,La139,Ce140,Pr141,Nd146,Sm147,Eu153,Gd157,Dy163,Er166,Yb172,Lu175,Hf178,Pb204,Pb206,Pb207,Pb208,Th232,U238	CTEM - 6.d
/Users/224742i/Desktop/2019-06-10 GA UPb 7700/NTEM - 15.csv	2019-06-10 22:04:35.000	2019-06-10 22:06:19.893	2022-02-28 11:04:05.841	200	22	Si29,Ca43,Ti49,Zr91,La139,Ce140,Pr141,Nd146,Sm147,Eu153,Gd157,Dy163,Er166,Yb172,Lu175,Hf178,Pb204,Pb206,Pb207,Pb208,Th232,U238	NTEM - 15.d
/Users/224742i/Desktop/2019-06-10 GA UPb 7700/508 - 26.csv	2019-06-10 17:09:26.000	2019-06-10 17:11:10.893	2022-02-28 11:03:59.846	200	22	Si29,Ca43,Ti49,Zr91,La139,Ce140,Pr141,Nd146,Sm147,Eu153,Gd157,Dy163,Er166,Yb172,Lu175,Hf178,Pb204,Pb206,Pb207,Pb208,Th232,U238	508 - 26.d
/Users/224742i/Desktop/2019-06-10 GA UPb 7700/NTEM - 29.csv	2019-06-10 22:43:03.000	2019-06-10 22:44:47.893	2022-02-28 11:04:05.855	200	22	Si29,Ca43,Ti49,Zr91,La139,Ce140,Pr141,Nd146,Sm147,Eu153,Gd157,Dy163,Er166,Yb172,Lu175,Hf178,Pb204,Pb206,Pb207,Pb208,Th232,U238	NTEM - 29.d
/Users/224742i/Desktop/2019-06-10 GA UPb 7700/508 - 15.csv	2019-06-10 16:46:06.000	2019-06-10 16:47:50.893	2022-02-28 11:04:05.885	200	22	Si29,Ca43,Ti49,Zr91,La139,Ce140,Pr141,Nd146,Sm147,Eu153,Gd157,Dy163,Er166,Yb172,Lu175,Hf178,Pb204,Pb206,Pb207,Pb208,Th232,U238	508 - 15.d
/Users/224742i/Desktop/2019-06-10 GA UPb 7700/NOG1 - 17.csv	2019-06-11 00:57:33.000	2019-06-11 00:59:17.893	2022-02-28 11:04:05.901	200	22	Si29,Ca43,Ti49,Zr91,La139,Ce140,Pr141,Nd146,Sm147,Eu153,Gd157,Dy163,Er166,Yb172,Lu175,Hf178,Pb204,Pb206,Pb207,Pb208,Th232,U238	NOG1 - 17.d
/Users/224742i/Desktop/2019-06-10 GA UPb 7700/508 - 29.csv	2019-06-10 17:15:47.000	2019-06-10 17:17:31.893	2022-02-28 11:04:05.938	200	22	Si29,Ca43,Ti49,Zr91,La139,Ce140,Pr141,Nd146,Sm147,Eu153,Gd157,Dy163,Er166,Yb172,Lu175,Hf178,Pb204,Pb206,Pb207,Pb208,Th232,U238	508 - 29.d
/Users/224742i/Desktop/2019-06-10 GA UPb 7700/NQGN - 5.csv	2019-06-11 03:34:00.000	2019-06-11 03:35:44.893	2022-02-28 11:04:05.953	200	22	Si29,Ca43,Ti49,Zr91,La139,Ce140,Pr141,Nd146,Sm147,Eu153,Gd157,Dy163,Er166,Yb172,Lu175,Hf178,Pb204,Pb206,Pb207,Pb208,Th232,U238	NQGN - 5.d
/Users/224742i/Desktop/2019-06-10 GA UPb 7700/mud - 13.csv	2019-06-11 02:14:34.000	2019-06-11 02:16:18.893	2022-02-28 11:04:05.966	200	22	Si29,Ca43,Ti49,Zr91,La139,Ce140,Pr141,Nd146,Sm147,Eu153,Gd157,Dy163,Er166,Yb172,Lu175,Hf178,Pb204,Pb206,Pb207,Pb208,Th232,U238	mud - 13.d
/Users/224742i/Desktop/2019-06-10 GA UPb 7700/NQGN - 14.csv	2019-06-11 03:53:01.000	2019-06-11 03:54:45.893	2022-02-28 11:04:05.995	200	22	Si29,Ca43,Ti49,Zr91,La139,Ce140,Pr141,Nd146,Sm147,Eu153,Gd157,Dy163,Er166,Yb172,Lu175,Hf178,Pb204,Pb206,Pb207,Pb208,Th232,U238	NQGN - 14.d
/Users/224742i/Desktop/2019-06-10 GA UPb 7700/508 - 1.csv	2019-06-10 15:54:28.000	2019-06-10 15:56:12.893	2022-02-28 11:04:06.012	200	22	Si29,Ca43,Ti49,Zr91,La139,Ce140,Pr141,Nd146,Sm147,Eu153,Gd157,Dy163,Er166,Yb172,Lu175,Hf178,Pb204,Pb206,Pb207,Pb208,Th232,U238	508 - 1.d
/Users/224742i/Desktop/2019-06-10 GA UPb 7700/NQGN - 28.csv	2019-06-11 04:31:29.000	2019-06-11 04:33:13.893	2022-02-28 11:04:06.042	200	22	Si29,Ca43,Ti49,Zr91,La139,Ce140,Pr141,Nd146,Sm147,Eu153,Gd157,Dy163,Er166,Yb172,Lu175,Hf178,Pb204,Pb206,Pb207,Pb208,Th232,U238	NQGN - 28.d
/Users/224742i/Desktop/2019-06-10 GA UPb 7700/NTEM - 5.csv	2019-06-10 21:43:18.000	2019-06-10 21:45:02.893	2022-02-28 11:04:06.056	200	22	Si29,Ca43,Ti49,Zr91,La139,Ce140,Pr141,Nd146,Sm147,Eu153,Gd157,Dy163,Er166,Yb172,Lu175,Hf178,Pb204,Pb206,Pb207,Pb208,Th232,U238	NTEM - 5.d
/Users/224742i/Desktop/2019-06-10 GA UPb 7700/P1n - 2.csv	2019-06-10 16:15:56.000	2019-06-10 16:17:40.893	2022-02-28 11:03:59.854	200	22	Si29,Ca43,Ti49,Zr91,La139,Ce140,Pr141,Nd146,Sm147,Eu153,Gd157,Dy163,Er166,Yb172,Lu175,Hf178,Pb204,Pb206,Pb207,Pb208,Th232,U238	P1n - 2.d
/Users/224742i/Desktop/2019-06-10 GA UPb 7700/P1 - 4.csv	2019-06-11 03:14:33.000	2019-06-11 03:16:17.893	2022-02-28 11:04:06.070	200	22	Si29,Ca43,Ti49,Zr91,La139,Ce140,Pr141,Nd146,Sm147,Eu153,Gd157,Dy163,Er166,Yb172,Lu175,Hf178,Pb204,Pb206,Pb207,Pb208,Th232,U238	P1 - 4.d
/Users/224742i/Desktop/2019-06-10 GA UPb 7700/P1 - 5.csv	2019-06-11 06:33:44.000	2019-06-11 06:35:28.893	2022-02-28 11:04:06.098	200	22	Si29,Ca43,Ti49,Zr91,La139,Ce140,Pr141,Nd146,Sm147,Eu153,Gd157,Dy163,Er166,Yb172,Lu175,Hf178,Pb204,Pb206,Pb207,Pb208,Th232,U238	P1 - 5.d
/Users/224742i/Desktop/2019-06-10 GA UPb 7700/NTEM - 4.csv	2019-06-10 21:28:03.000	2019-06-10 21:29:47.893	2022-02-28 11:04:06.155	200	22	Si29,Ca43,Ti49,Zr91,La139,Ce140,Pr141,Nd146,Sm147,Eu153,Gd157,Dy163,Er166,Yb172,Lu175,Hf178,Pb204,Pb206,Pb207,Pb208,Th232,U238	NTEM - 4.d
/Users/224742i/Desktop/2019-06-10 GA UPb 7700/NQGN - 29.csv	2019-06-11 04:33:38.000	2019-06-11 04:35:22.893	2022-02-28 11:04:06.185	200	22	Si29,Ca43,Ti49,Zr91,La139,Ce140,Pr141,Nd146,Sm147,Eu153,Gd157,Dy163,Er166,Yb172,Lu175,Hf178,Pb204,Pb206,Pb207,Pb208,Th232,U238	NQGN - 29.d
/Users/224742i/Desktop/2019-06-10 GA UPb 7700/mud - 12.csv	2019-06-11 01:23:24.000	2019-06-11 01:25:08.893	2022-02-28 11:04:06.199	200	22	Si29,Ca43,Ti49,Zr91,La139,Ce140,Pr141,Nd146,Sm147,Eu153,Gd157,Dy163,Er166,Yb172,Lu175,Hf178,Pb204,Pb206,Pb207,Pb208,Th232,U238	mud - 12.d
/Users/224742i/Desktop/2019-06-10 GA UPb 7700/NQGN - 15.csv	2019-06-11 03:55:11.000	2019-06-11 03:56:55.893	2022-02-28 11:04:06.215	200	22	Si29,Ca43,Ti49,Zr91,La139,Ce140,Pr141,Nd146,Sm147,Eu153,Gd157,Dy163,Er166,Yb172,Lu175,Hf178,Pb204,Pb206,Pb207,Pb208,Th232,U238	NQGN - 15.d
/Users/224742i/Desktop/2019-06-10 GA UPb 7700/NQGN - 4.csv	2019-06-11 03:31:50.000	2019-06-11 03:33:34.893	2022-02-28 11:04:06.244	200	22	Si29,Ca43,Ti49,Zr91,La139,Ce140,Pr141,Nd146,Sm147,Eu153,Gd157,Dy163,Er166,Yb172,Lu175,Hf178,Pb204,Pb206,Pb207,Pb208,Th232,U238	NQGN - 4.d
/Users/224742i/Desktop/2019-06-10 GA UPb 7700/508 - 28.csv	2019-06-10 17:13:41.000	2019-06-10 17:15:25.893	2022-02-28 11:04:06.260	200	22	Si29,Ca43,Ti49,Zr91,La139,Ce140,Pr141,Nd146,Sm147,Eu153,Gd157,Dy163,Er166,Yb172,Lu175,Hf178,Pb204,Pb206,Pb207,Pb208,Th232,U238	508 - 28.d
/Users/224742i/Desktop/2019-06-10 GA UPb 7700/NOG1 - 16.csv	2019-06-11 00:55:29.000	2019-06-11 00:57:13.893	2022-02-28 11:04:06.274	200	22	Si29,Ca43,Ti49,Zr91,La139,Ce140,Pr141,Nd146,Sm147,Eu153,Gd157,Dy163,Er166,Yb172,Lu175,Hf178,Pb204,Pb206,Pb207,Pb208,Th232,U238	NOG1 - 16.d
/Users/224742i/Desktop/2019-06-10 GA UPb 7700/508 - 14.csv	2019-06-10 16:44:01.000	2019-06-10 16:45:45.893	2022-02-28 11:04:06.306	200	22	Si29,Ca43,Ti49,Zr91,La139,Ce140,Pr141,Nd146,Sm147,Eu153,Gd157,Dy163,Er166,Yb172,Lu175,Hf178,Pb204,Pb206,Pb207,Pb208,Th232,U238	508 - 14.d
/Users/224742i/Desktop/2019-06-10 GA UPb 7700/NQGN - 27.csv	2019-06-11 04:29:24.000	2019-06-11 04:31:08.893	2022-02-28 11:03:59.858	200	22	Si29,Ca43,Ti49,Zr91,La139,Ce140,Pr141,Nd146,Sm147,Eu153,Gd157,Dy163,Er166,Yb172,Lu175,Hf178,Pb204,Pb206,Pb207,Pb208,Th232,U238	NQGN - 27.d
/Users/224742i/Desktop/2019-06-10 GA UPb 7700/NTEM - 28.csv	2019-06-10 22:40:53.000	2019-06-10 22:42:37.893	2022-02-28 11:04:06.321	200	22	Si29,Ca43,Ti49,Zr91,La139,Ce140,Pr141,Nd146,Sm147,Eu153,Gd157,Dy163,Er166,Yb172,Lu175,Hf178,Pb204,Pb206,Pb207,Pb208,Th232,U238	NTEM - 28.d
/Users/224742i/Desktop/2019-06-10 GA UPb 7700/NTEM - 14.csv	2019-06-10 22:02:26.000	2019-06-10 22:04:10.893	2022-02-28 11:04:06.359	200	22	Si29,Ca43,Ti49,Zr91,La139,Ce140,Pr141,Nd146,Sm147,Eu153,Gd157,Dy163,Er166,Yb172,Lu175,Hf178,Pb204,Pb206,Pb207,Pb208,Th232,U238	NTEM - 14.d
/Users/224742i/Desktop/2019-06-10 GA UPb 7700/gj1 - 1.csv	2019-06-10 14:35:29.000	2019-06-10 14:37:13.893	2022-02-28 11:04:06.374	200	22	Si29,Ca43,Ti49,Zr91,La139,Ce140,Pr141,Nd146,Sm147,Eu153,Gd157,Dy163,Er166,Yb172,Lu175,Hf178,Pb204,Pb206,Pb207,Pb208,Th232,U238	gj1 - 1.d
/Users/224742i/Desktop/2019-06-10 GA UPb 7700/CTEM - 7.csv	2019-06-10 23:02:10.000	2019-06-10 23:03:54.893	2022-02-28 11:04:06.389	200	22	Si29,Ca43,Ti49,Zr91,La139,Ce140,Pr141,Nd146,Sm147,Eu153,Gd157,Dy163,Er166,Yb172,Lu175,Hf178,Pb204,Pb206,Pb207,Pb208,Th232,U238	CTEM - 7.d
/Users/224742i/Desktop/2019-06-10 GA UPb 7700/506 - 21.csv	2019-06-10 15:33:07.000	2019-06-10 15:34:51.893	2022-02-28 11:04:06.420	200	22	Si29,Ca43,Ti49,Zr91,La139,Ce140,Pr141,Nd146,Sm147,Eu153,Gd157,Dy163,Er166,Yb172,Lu175,Hf178,Pb204,Pb206,Pb207,Pb208,Th232,U238	506 - 21.d
/Users/224742i/Desktop/2019-06-10 GA UPb 7700/gj1 - 11.csv	2019-06-11 00:17:05.000	2019-06-11 00:18:49.893	2022-02-28 11:04:06.435	200	22	Si29,Ca43,Ti49,Zr91,La139,Ce140,Pr141,Nd146,Sm147,Eu153,Gd157,Dy163,Er166,Yb172,Lu175,Hf178,Pb204,Pb206,Pb207,Pb208,Th232,U238	gj1 - 11.d
/Users/224742i/Desktop/2019-06-10 GA UPb 7700/R33 - 2.csv	2019-06-10 15:30:57.000	2019-06-10 15:32:41.893	2022-02-28 11:04:06.467	200	22	Si29,Ca43,Ti49,Zr91,La139,Ce140,Pr141,Nd146,Sm147,Eu153,Gd157,Dy163,Er166,Yb172,Lu175,Hf178,Pb204,Pb206,Pb207,Pb208,Th232,U238	R33 - 2.d
/Users/224742i/Desktop/2019-06-10 GA UPb 7700/CQGN - 7.csv	2019-06-11 05:03:45.000	2019-06-11 05:05:29.893	2022-02-28 11:04:06.483	200	22	Si29,Ca43,Ti49,Zr91,La139,Ce140,Pr141,Nd146,Sm147,Eu153,Gd157,Dy163,Er166,Yb172,Lu175,Hf178,Pb204,Pb206,Pb207,Pb208,Th232,U238	CQGN - 7.d
/Users/224742i/Desktop/2019-06-10 GA UPb 7700/NQGN - 26.csv	2019-06-11 04:27:14.000	2019-06-11 04:28:58.893	2022-02-28 11:03:59.862	200	22	Si29,Ca43,Ti49,Zr91,La139,Ce140,Pr141,Nd146,Sm147,Eu153,Gd157,Dy163,Er166,Yb172,Lu175,Hf178,Pb204,Pb206,Pb207,Pb208,Th232,U238	NQGN - 26.d
/Users/224742i/Desktop/2019-06-10 GA UPb 7700/P1n - 3.csv	2019-06-10 18:02:48.000	2019-06-10 18:04:32.893	2022-02-28 11:03:59.908	200	22	Si29,Ca43,Ti49,Zr91,La139,Ce140,Pr141,Nd146,Sm147,Eu153,Gd157,Dy163,Er166,Yb172,Lu175,Hf178,Pb204,Pb206,Pb207,Pb208,Th232,U238	P1n - 3.d
/Users/224742i/Desktop/2019-06-10 GA UPb 7700/508 - 27.csv	2019-06-10 17:11:32.000	2019-06-10 17:13:16.893	2022-02-28 11:03:59.912	200	22	Si29,Ca43,Ti49,Zr91,La139,Ce140,Pr141,Nd146,Sm147,Eu153,Gd157,Dy163,Er166,Yb172,Lu175,Hf178,Pb204,Pb206,Pb207,Pb208,Th232,U238	508 - 27.d
/Users/224742i/Desktop/2019-06-10 GA UPb 7700/NOG1 - 19.csv	2019-06-11 01:01:47.000	2019-06-11 01:03:31.893	2022-02-28 11:03:59.917	200	22	Si29,Ca43,Ti49,Zr91,La139,Ce140,Pr141,Nd146,Sm147,Eu153,Gd157,Dy163,Er166,Yb172,Lu175,Hf178,Pb204,Pb206,Pb207,Pb208,Th232,U238	NOG1 - 19.d
/Users/224742i/Desktop/2019-06-10 GA UPb 7700/NTEM - 19.csv	2019-06-10 22:13:05.000	2019-06-10 22:14:49.893	2022-02-28 11:03:59.567	200	22	Si29,Ca43,Ti49,Zr91,La139,Ce140,Pr141,Nd146,Sm147,Eu153,Gd157,Dy163,Er166,Yb172,Lu175,Hf178,Pb204,Pb206,Pb207,Pb208,Th232,U238	NTEM - 19.d
/Users/224742i/Desktop/2019-06-10 GA UPb 7700/NOG1 - 25.csv	2019-06-11 01:36:21.000	2019-06-11 01:38:05.893	2022-02-28 11:03:59.921	200	22	Si29,Ca43,Ti49,Zr91,La139,Ce140,Pr141,Nd146,Sm147,Eu153,Gd157,Dy163,Er166,Yb172,Lu175,Hf178,Pb204,Pb206,Pb207,Pb208,Th232,U238	NOG1 - 25.d
/Users/224742i/Desktop/2019-06-10 GA UPb 7700/NTEM - 27.csv	2019-06-10 22:38:48.000	2019-06-10 22:40:32.893	2022-02-28 11:03:59.924	200	22	Si29,Ca43,Ti49,Zr91,La139,Ce140,Pr141,Nd146,Sm147,Eu153,Gd157,Dy163,Er166,Yb172,Lu175,Hf178,Pb204,Pb206,Pb207,Pb208,Th232,U238	NTEM - 27.d
/Users/224742i/Desktop/2019-06-10 GA UPb 7700/91500 - 2.csv	2019-06-10 15:24:30.000	2019-06-10 15:26:14.893	2022-02-28 11:03:59.930	200	22	Si29,Ca43,Ti49,Zr91,La139,Ce140,Pr141,Nd146,Sm147,Eu153,Gd157,Dy163,Er166,Yb172,Lu175,Hf178,Pb204,Pb206,Pb207,Pb208,Th232,U238	91500 - 2.d
/Users/224742i/Desktop/2019-06-10 GA UPb 7700/610 - 1.csv	2019-06-10 14:20:12.000	2019-06-10 14:21:56.893	2022-02-28 11:03:59.933	200	22	Si29,Ca43,Ti49,Zr91,La139,Ce140,Pr141,Nd146,Sm147,Eu153,Gd157,Dy163,Er166,Yb172,Lu175,Hf178,Pb204,Pb206,Pb207,Pb208,Th232,U238	610 - 1.d
/Users/224742i/Desktop/2019-06-10 GA UPb 7700/506 - 12.csv	2019-06-10 15:05:25.000	2019-06-10 15:07:09.892	2022-02-28 11:03:59.939	200	22	Si29,Ca43,Ti49,Zr91,La139,Ce140,Pr141,Nd146,Sm147,Eu153,Gd157,Dy163,Er166,Yb172,Lu175,Hf178,Pb204,Pb206,Pb207,Pb208,Th232,U238	506 - 12.d
/Users/224742i/Desktop/2019-06-10 GA UPb 7700/CTEM - 8.csv	2019-06-10 23:04:19.000	2019-06-10 23:06:03.893	2022-02-28 11:03:59.942	200	22	Si29,Ca43,Ti49,Zr91,La139,Ce140,Pr141,Nd146,Sm147,Eu153,Gd157,Dy163,Er166,Yb172,Lu175,Hf178,Pb204,Pb206,Pb207,Pb208,Th232,U238	CTEM - 8.d
/Users/224742i/Desktop/2019-06-10 GA UPb 7700/FC1 - 1.csv	2019-06-10 14:24:29.000	2019-06-10 14:26:13.893	2022-02-28 11:03:59.954	200	22	Si29,Ca43,Ti49,Zr91,La139,Ce140,Pr141,Nd146,Sm147,Eu153,Gd157,Dy163,Er166,Yb172,Lu175,Hf178,Pb204,Pb206,Pb207,Pb208,Th232,U238	FC1 - 1.d
/Users/224742i/Desktop/2019-06-10 GA UPb 7700/CQGN - 8.csv	2019-06-11 05:05:50.000	2019-06-11 05:07:34.893	2022-02-28 11:03:59.961	200	22	Si29,Ca43,Ti49,Zr91,La139,Ce140,Pr141,Nd146,Sm147,Eu153,Gd157,Dy163,Er166,Yb172,Lu175,Hf178,Pb204,Pb206,Pb207,Pb208,Th232,U238	CQGN - 8.d
/Users/224742i/Desktop/2019-06-10 GA UPb 7700/R33 - 9.csv	2019-06-10 22:23:41.000	2019-06-10 22:25:25.893	2022-02-28 11:03:59.965	200	22	Si29,Ca43,Ti49,Zr91,La139,Ce140,Pr141,Nd146,Sm147,Eu153,Gd157,Dy163,Er166,Yb172,Lu175,Hf178,Pb204,Pb206,Pb207,Pb208,Th232,U238	R33 - 9.d
/Users/224742i/Desktop/2019-06-10 GA UPb 7700/FC1 - 5.csv	2019-06-10 21:34:31.000	2019-06-10 21:36:15.893	2022-02-28 11:03:59.972	200	22	Si29,Ca43,Ti49,Zr91,La139,Ce140,Pr141,Nd146,Sm147,Eu153,Gd157,Dy163,Er166,Yb172,Lu175,Hf178,Pb204,Pb206,Pb207,Pb208,Th232,U238	FC1 - 5.d
/Users/224742i/Desktop/2019-06-10 GA UPb 7700/NTEM - 25.csv	2019-06-10 22:34:33.000	2019-06-10 22:36:17.893	2022-02-28 11:03:59.570	200	22	Si29,Ca43,Ti49,Zr91,La139,Ce140,Pr141,Nd146,Sm147,Eu153,Gd157,Dy163,Er166,Yb172,Lu175,Hf178,Pb204,Pb206,Pb207,Pb208,Th232,U238	NTEM - 25.d
/Users/224742i/Desktop/2019-06-10 GA UPb 7700/506 - 16.csv	2019-06-10 15:13:54.000	2019-06-10 15:15:38.893	2022-02-28 11:03:59.977	200	22	Si29,Ca43,Ti49,Zr91,La139,Ce140,Pr141,Nd146,Sm147,Eu153,Gd157,Dy163,Er166,Yb172,Lu175,Hf178,Pb204,Pb206,Pb207,Pb208,Th232,U238	506 - 16.d
/Users/224742i/Desktop/2019-06-10 GA UPb 7700/610 - 5.csv	2019-06-10 21:30:13.000	2019-06-10 21:31:57.893	2022-02-28 11:03:59.982	200	22	Si29,Ca43,Ti49,Zr91,La139,Ce140,Pr141,Nd146,Sm147,Eu153,Gd157,Dy163,Er166,Yb172,Lu175,Hf178,Pb204,Pb206,Pb207,Pb208,Th232,U238	610 - 5.d
/Users/224742i/Desktop/2019-06-10 GA UPb 7700/NTEM - 23.csv	2019-06-10 22:30:18.000	2019-06-10 22:32:02.893	2022-02-28 11:03:59.989	200	22	Si29,Ca43,Ti49,Zr91,La139,Ce140,Pr141,Nd146,Sm147,Eu153,Gd157,Dy163,Er166,Yb172,Lu175,Hf178,Pb204,Pb206,Pb207,Pb208,Th232,U238	NTEM - 23.d
/Users/224742i/Desktop/2019-06-10 GA UPb 7700/91500 - 6.csv	2019-06-10 19:17:33.000	2019-06-10 19:19:17.893	2022-02-28 11:03:59.993	200	22	Si29,Ca43,Ti49,Zr91,La139,Ce140,Pr141,Nd146,Sm147,Eu153,Gd157,Dy163,Er166,Yb172,Lu175,Hf178,Pb204,Pb206,Pb207,Pb208,Th232,U238	91500 - 6.d
/Users/224742i/Desktop/2019-06-10 GA UPb 7700/508 - 23.csv	2019-06-10 17:03:04.000	2019-06-10 17:04:48.893	2022-02-28 11:03:59.998	200	22	Si29,Ca43,Ti49,Zr91,La139,Ce140,Pr141,Nd146,Sm147,Eu153,Gd157,Dy163,Er166,Yb172,Lu175,Hf178,Pb204,Pb206,Pb207,Pb208,Th232,U238	508 - 23.d
/Users/224742i/Desktop/2019-06-10 GA UPb 7700/NOG1 - 21.csv	2019-06-11 01:27:44.000	2019-06-11 01:29:28.893	2022-02-28 11:04:00.046	200	22	Si29,Ca43,Ti49,Zr91,La139,Ce140,Pr141,Nd146,Sm147,Eu153,Gd157,Dy163,Er166,Yb172,Lu175,Hf178,Pb204,Pb206,Pb207,Pb208,Th232,U238	NOG1 - 21.d
/Users/224742i/Desktop/2019-06-10 GA UPb 7700/ogc - 4.csv	2019-06-10 19:49:38.000	2019-06-10 19:51:22.893	2022-02-28 11:04:00.050	200	22	Si29,Ca43,Ti49,Zr91,La139,Ce140,Pr141,Nd146,Sm147,Eu153,Gd157,Dy163,Er166,Yb172,Lu175,Hf178,Pb204,Pb206,Pb207,Pb208,Th232,U238	ogc - 4.d
/Users/224742i/Desktop/2019-06-10 GA UPb 7700/NQGN - 22.csv	2019-06-11 04:18:45.000	2019-06-11 04:20:29.893	2022-02-28 11:04:00.058	200	22	Si29,Ca43,Ti49,Zr91,La139,Ce140,Pr141,Nd146,Sm147,Eu153,Gd157,Dy163,Er166,Yb172,Lu175,Hf178,Pb204,Pb206,Pb207,Pb208,Th232,U238	NQGN - 22.d
/Users/224742i/Desktop/2019-06-10 GA UPb 7700/P1n - 7.csv	2019-06-11 01:14:43.000	2019-06-11 01:16:27.893	2022-02-28 11:04:00.062	200	22	Si29,Ca43,Ti49,Zr91,La139,Ce140,Pr141,Nd146,Sm147,Eu153,Gd157,Dy163,Er166,Yb172,Lu175,Hf178,Pb204,Pb206,Pb207,Pb208,Th232,U238	P1n - 7.d
/Users/224742i/Desktop/2019-06-10 GA UPb 7700/P1n - 6.csv	2019-06-10 23:28:00.000	2019-06-10 23:29:44.893	2022-02-28 11:04:00.067	200	22	Si29,Ca43,Ti49,Zr91,La139,Ce140,Pr141,Nd146,Sm147,Eu153,Gd157,Dy163,Er166,Yb172,Lu175,Hf178,Pb204,Pb206,Pb207,Pb208,Th232,U238	P1n - 6.d
/Users/224742i/Desktop/2019-06-10 GA UPb 7700/ogc - 2.csv	2019-06-10 16:13:43.000	2019-06-10 16:15:27.893	2022-02-28 11:03:59.574	200	22	Si29,Ca43,Ti49,Zr91,La139,Ce140,Pr141,Nd146,Sm147,Eu153,Gd157,Dy163,Er166,Yb172,Lu175,Hf178,Pb204,Pb206,Pb207,Pb208,Th232,U238	ogc - 2.d
/Users/224742i/Desktop/2019-06-10 GA UPb 7700/mud - 18.csv	2019-06-11 06:16:19.000	2019-06-11 06:18:03.893	2022-02-28 11:04:00.077	200	22	Si29,Ca43,Ti49,Zr91,La139,Ce140,Pr141,Nd146,Sm147,Eu153,Gd157,Dy163,Er166,Yb172,Lu175,Hf178,Pb204,Pb206,Pb207,Pb208,Th232,U238	mud - 18.d
/Users/224742i/Desktop/2019-06-10 GA UPb 7700/NQGN - 23.csv	2019-06-11 04:20:54.000	2019-06-11 04:22:38.893	2022-02-28 11:04:00.082	200	22	Si29,Ca43,Ti49,Zr91,La139,Ce140,Pr141,Nd146,Sm147,Eu153,Gd157,Dy163,Er166,Yb172,Lu175,Hf178,Pb204,Pb206,Pb207,Pb208,Th232,U238	NQGN - 23.d
/Users/224742i/Desktop/2019-06-10 GA UPb 7700/ogc - 5.csv	2019-06-10 21:36:39.000	2019-06-10 21:38:23.893	2022-02-28 11:04:00.090	200	22	Si29,Ca43,Ti49,Zr91,La139,Ce140,Pr141,Nd146,Sm147,Eu153,Gd157,Dy163,Er166,Yb172,Lu175,Hf178,Pb204,Pb206,Pb207,Pb208,Th232,U238	ogc - 5.d
/Users/224742i/Desktop/2019-06-10 GA UPb 7700/NOG1 - 20.csv	2019-06-11 01:03:57.000	2019-06-11 01:05:41.893	2022-02-28 11:04:00.095	200	22	Si29,Ca43,Ti49,Zr91,La139,Ce140,Pr141,Nd146,Sm147,Eu153,Gd157,Dy163,Er166,Yb172,Lu175,Hf178,Pb204,Pb206,Pb207,Pb208,Th232,U238	NOG1 - 20.d
/Users/224742i/Desktop/2019-06-10 GA UPb 7700/508 - 22.csv	2019-06-10 17:00:59.000	2019-06-10 17:02:43.893	2022-02-28 11:04:00.122	200	22	Si29,Ca43,Ti49,Zr91,La139,Ce140,Pr141,Nd146,Sm147,Eu153,Gd157,Dy163,Er166,Yb172,Lu175,Hf178,Pb204,Pb206,Pb207,Pb208,Th232,U238	508 - 22.d
/Users/224742i/Desktop/2019-06-10 GA UPb 7700/91500 - 7.csv	2019-06-10 20:21:51.000	2019-06-10 20:23:35.893	2022-02-28 11:04:00.131	200	22	Si29,Ca43,Ti49,Zr91,La139,Ce140,Pr141,Nd146,Sm147,Eu153,Gd157,Dy163,Er166,Yb172,Lu175,Hf178,Pb204,Pb206,Pb207,Pb208,Th232,U238	91500 - 7.d
/Users/224742i/Desktop/2019-06-10 GA UPb 7700/NTEM - 22.csv	2019-06-10 22:28:09.000	2019-06-10 22:29:53.893	2022-02-28 11:04:00.136	200	22	Si29,Ca43,Ti49,Zr91,La139,Ce140,Pr141,Nd146,Sm147,Eu153,Gd157,Dy163,Er166,Yb172,Lu175,Hf178,Pb204,Pb206,Pb207,Pb208,Th232,U238	NTEM - 22.d
/Users/224742i/Desktop/2019-06-10 GA UPb 7700/610 - 4.csv	2019-06-10 19:43:12.000	2019-06-10 19:44:56.893	2022-02-28 11:04:00.144	200	22	Si29,Ca43,Ti49,Zr91,La139,Ce140,Pr141,Nd146,Sm147,Eu153,Gd157,Dy163,Er166,Yb172,Lu175,Hf178,Pb204,Pb206,Pb207,Pb208,Th232,U238	610 - 4.d
/Users/224742i/Desktop/2019-06-10 GA UPb 7700/506 - 17.csv	2019-06-10 15:16:00.000	2019-06-10 15:17:44.893	2022-02-28 11:04:00.150	200	22	Si29,Ca43,Ti49,Zr91,La139,Ce140,Pr141,Nd146,Sm147,Eu153,Gd157,Dy163,Er166,Yb172,Lu175,Hf178,Pb204,Pb206,Pb207,Pb208,Th232,U238	506 - 17.d
/Users/224742i/Desktop/2019-06-10 GA UPb 7700/FC1 - 4.csv	2019-06-10 19:47:31.000	2019-06-10 19:49:15.893	2022-02-28 11:04:00.155	200	22	Si29,Ca43,Ti49,Zr91,La139,Ce140,Pr141,Nd146,Sm147,Eu153,Gd157,Dy163,Er166,Yb172,Lu175,Hf178,Pb204,Pb206,Pb207,Pb208,Th232,U238	FC1 - 4.d
/Users/224742i/Desktop/2019-06-10 GA UPb 7700/508 - 19.csv	2019-06-10 16:54:36.000	2019-06-10 16:56:20.893	2022-02-28 11:03:59.577	200	22	Si29,Ca43,Ti49,Zr91,La139,Ce140,Pr141,Nd146,Sm147,Eu153,Gd157,Dy163,Er166,Yb172,Lu175,Hf178,Pb204,Pb206,Pb207,Pb208,Th232,U238	508 - 19.d
/Users/224742i/Desktop/2019-06-10 GA UPb 7700/R33 - 8.csv	2019-06-10 21:19:22.000	2019-06-10 21:21:06.893	2022-02-28 11:04:00.163	200	22	Si29,Ca43,Ti49,Zr91,La139,Ce140,Pr141,Nd146,Sm147,Eu153,Gd157,Dy163,Er166,Yb172,Lu175,Hf178,Pb204,Pb206,Pb207,Pb208,Th232,U238	R33 - 8.d
/Users/224742i/Desktop/2019-06-10 GA UPb 7700/FC1 - 6.csv	2019-06-10 23:23:37.000	2019-06-10 23:25:21.893	2022-02-28 11:04:00.168	200	22	Si29,Ca43,Ti49,Zr91,La139,Ce140,Pr141,Nd146,Sm147,Eu153,Gd157,Dy163,Er166,Yb172,Lu175,Hf178,Pb204,Pb206,Pb207,Pb208,Th232,U238	FC1 - 6.d
/Users/224742i/Desktop/2019-06-10 GA UPb 7700/506 - 15.csv	2019-06-10 15:11:45.000	2019-06-10 15:13:29.893	2022-02-28 11:04:00.176	200	22	Si29,Ca43,Ti49,Zr91,La139,Ce140,Pr141,Nd146,Sm147,Eu153,Gd157,Dy163,Er166,Yb172,Lu175,Hf178,Pb204,Pb206,Pb207,Pb208,Th232,U238	506 - 15.d
/Users/224742i/Desktop/2019-06-10 GA UPb 7700/506 - 29.csv	2019-06-10 15:50:13.000	2019-06-10 15:51:57.893	2022-02-28 11:04:00.220	200	22	Si29,Ca43,Ti49,Zr91,La139,Ce140,Pr141,Nd146,Sm147,Eu153,Gd157,Dy163,Er166,Yb172,Lu175,Hf178,Pb204,Pb206,Pb207,Pb208,Th232,U238	506 - 29.d
/Users/224742i/Desktop/2019-06-10 GA UPb 7700/610 - 6.csv	2019-06-10 23:19:16.000	2019-06-10 23:21:00.893	2022-02-28 11:04:00.224	200	22	Si29,Ca43,Ti49,Zr91,La139,Ce140,Pr141,Nd146,Sm147,Eu153,Gd157,Dy163,Er166,Yb172,Lu175,Hf178,Pb204,Pb206,Pb207,Pb208,Th232,U238	610 - 6.d
/Users/224742i/Desktop/2019-06-10 GA UPb 7700/gj1 - 9.csv	2019-06-10 22:19:26.000	2019-06-10 22:21:10.893	2022-02-28 11:04:00.233	200	22	Si29,Ca43,Ti49,Zr91,La139,Ce140,Pr141,Nd146,Sm147,Eu153,Gd157,Dy163,Er166,Yb172,Lu175,Hf178,Pb204,Pb206,Pb207,Pb208,Th232,U238	gj1 - 9.d
/Users/224742i/Desktop/2019-06-10 GA UPb 7700/NTEM - 20.csv	2019-06-10 22:15:10.000	2019-06-10 22:16:54.893	2022-02-28 11:04:00.238	200	22	Si29,Ca43,Ti49,Zr91,La139,Ce140,Pr141,Nd146,Sm147,Eu153,Gd157,Dy163,Er166,Yb172,Lu175,Hf178,Pb204,Pb206,Pb207,Pb208,Th232,U238	NTEM - 20.d
/Users/224742i/Desktop/2019-06-10 GA UPb 7700/91500 - 5.csv	2019-06-10 18:24:11.000	2019-06-10 18:25:55.893	2022-02-28 11:04:00.243	200	22	Si29,Ca43,Ti49,Zr91,La139,Ce140,Pr141,Nd146,Sm147,Eu153,Gd157,Dy163,Er166,Yb172,Lu175,Hf178,Pb204,Pb206,Pb207,Pb208,Th232,U238	91500 - 5.d
/Users/224742i/Desktop/2019-06-10 GA UPb 7700/508 - 20.csv	2019-06-10 16:56:46.000	2019-06-10 16:58:30.893	2022-02-28 11:04:00.253	200	22	Si29,Ca43,Ti49,Zr91,La139,Ce140,Pr141,Nd146,Sm147,Eu153,Gd157,Dy163,Er166,Yb172,Lu175,Hf178,Pb204,Pb206,Pb207,Pb208,Th232,U238	508 - 20.d
/Users/224742i/Desktop/2019-06-10 GA UPb 7700/ogc - 7.csv	2019-06-11 01:12:32.000	2019-06-11 01:14:16.893	2022-02-28 11:04:00.258	200	22	Si29,Ca43,Ti49,Zr91,La139,Ce140,Pr141,Nd146,Sm147,Eu153,Gd157,Dy163,Er166,Yb172,Lu175,Hf178,Pb204,Pb206,Pb207,Pb208,Th232,U238	ogc - 7.d
/Users/224742i/Desktop/2019-06-10 GA UPb 7700/P1n - 10.csv	2019-06-11 06:29:21.000	2019-06-11 06:31:05.893	2022-02-28 11:03:59.581	200	22	Si29,Ca43,Ti49,Zr91,La139,Ce140,Pr141,Nd146,Sm147,Eu153,Gd157,Dy163,Er166,Yb172,Lu175,Hf178,Pb204,Pb206,Pb207,Pb208,Th232,U238	P1n - 10.d
/Users/224742i/Desktop/2019-06-10 GA UPb 7700/NOG1 - 22.csv	2019-06-11 01:30:02.000	2019-06-11 01:31:46.893	2022-02-28 11:04:00.267	200	22	Si29,Ca43,Ti49,Zr91,La139,Ce140,Pr141,Nd146,Sm147,Eu153,Gd157,Dy163,Er166,Yb172,Lu175,Hf178,Pb204,Pb206,Pb207,Pb208,Th232,U238	NOG1 - 22.d
/Users/224742i/Desktop/2019-06-10 GA UPb 7700/508 - 8.csv	2019-06-10 16:22:34.000	2019-06-10 16:24:18.893	2022-02-28 11:04:00.272	200	22	Si29,Ca43,Ti49,Zr91,La139,Ce140,Pr141,Nd146,Sm147,Eu153,Gd157,Dy163,Er166,Yb172,Lu175,Hf178,Pb204,Pb206,Pb207,Pb208,Th232,U238	508 - 8.d
/Users/224742i/Desktop/2019-06-10 GA UPb 7700/NQGN - 21.csv	2019-06-11 04:16:31.000	2019-06-11 04:18:15.893	2022-02-28 11:04:00.287	200	22	Si29,Ca43,Ti49,Zr91,La139,Ce140,Pr141,Nd146,Sm147,Eu153,Gd157,Dy163,Er166,Yb172,Lu175,Hf178,Pb204,Pb206,Pb207,Pb208,Th232,U238	NQGN - 21.d
/Users/224742i/Desktop/2019-06-10 GA UPb 7700/P1n - 4.csv	2019-06-10 19:51:53.000	2019-06-10 19:53:37.892	2022-02-28 11:04:00.296	200	22	Si29,Ca43,Ti49,Zr91,La139,Ce140,Pr141,Nd146,Sm147,Eu153,Gd157,Dy163,Er166,Yb172,Lu175,Hf178,Pb204,Pb206,Pb207,Pb208,Th232,U238	P1n - 4.d
/Users/224742i/Desktop/2019-06-10 GA UPb 7700/P1n - 5.csv	2019-06-10 21:38:54.000	2019-06-10 21:40:38.892	2022-02-28 11:04:00.301	200	22	Si29,Ca43,Ti49,Zr91,La139,Ce140,Pr141,Nd146,Sm147,Eu153,Gd157,Dy163,Er166,Yb172,Lu175,Hf178,Pb204,Pb206,Pb207,Pb208,Th232,U238	P1n - 5.d
/Users/224742i/Desktop/2019-06-10 GA UPb 7700/NQGN - 20.csv	2019-06-11 04:05:45.000	2019-06-11 04:07:29.893	2022-02-28 11:04:00.311	200	22	Si29,Ca43,Ti49,Zr91,La139,Ce140,Pr141,Nd146,Sm147,Eu153,Gd157,Dy163,Er166,Yb172,Lu175,Hf178,Pb204,Pb206,Pb207,Pb208,Th232,U238	NQGN - 20.d
/Users/224742i/Desktop/2019-06-10 GA UPb 7700/508 - 9.csv	2019-06-10 16:24:38.000	2019-06-10 16:26:22.893	2022-02-28 11:04:00.317	200	22	Si29,Ca43,Ti49,Zr91,La139,Ce140,Pr141,Nd146,Sm147,Eu153,Gd157,Dy163,Er166,Yb172,Lu175,Hf178,Pb204,Pb206,Pb207,Pb208,Th232,U238	508 - 9.d
/Users/224742i/Desktop/2019-06-10 GA UPb 7700/NOG1 - 23.csv	2019-06-11 01:32:07.000	2019-06-11 01:33:51.893	2022-02-28 11:04:00.322	200	22	Si29,Ca43,Ti49,Zr91,La139,Ce140,Pr141,Nd146,Sm147,Eu153,Gd157,Dy163,Er166,Yb172,Lu175,Hf178,Pb204,Pb206,Pb207,Pb208,Th232,U238	NOG1 - 23.d
/Users/224742i/Desktop/2019-06-10 GA UPb 7700/ogc - 6.csv	2019-06-10 23:25:49.000	2019-06-10 23:27:33.893	2022-02-28 11:04:00.332	200	22	Si29,Ca43,Ti49,Zr91,La139,Ce140,Pr141,Nd146,Sm147,Eu153,Gd157,Dy163,Er166,Yb172,Lu175,Hf178,Pb204,Pb206,Pb207,Pb208,Th232,U238	ogc - 6.d
/Users/224742i/Desktop/2019-06-10 GA UPb 7700/508 - 21.csv	2019-06-10 16:58:50.000	2019-06-10 17:00:34.893	2022-02-28 11:04:00.337	200	22	Si29,Ca43,Ti49,Zr91,La139,Ce140,Pr141,Nd146,Sm147,Eu153,Gd157,Dy163,Er166,Yb172,Lu175,Hf178,Pb204,Pb206,Pb207,Pb208,Th232,U238	508 - 21.d
Laser Log Files
File	File start time	File end time	Time file loaded	Samples	Offset (s)	Widths

## Sheet: Metadata-day2
Mass Spectrometer Files
File	File start time	File end time	Time file loaded	No of data points	No of channels	Channels	Samples
/Users/224742i/Desktop/2019-06-11 GA UPb 7700/FC1 - 3.csv	2019-06-11 18:40:22.000	2019-06-11 18:42:06.893	2022-02-28 13:38:36.321	200	22	Si29,Ca43,Ti49,Zr91,La139,Ce140,Pr141,Nd146,Sm147,Eu153,Gd157,Dy163,Er166,Yb172,Lu175,Hf178,Pb204,Pb206,Pb207,Pb208,Th232,U238	FC1 - 3.d
/Users/224742i/Desktop/2019-06-11 GA UPb 7700/P1n - 1.csv	2019-06-11 15:10:12.000	2019-06-11 15:11:56.893	2022-02-28 13:38:36.369	200	22	Si29,Ca43,Ti49,Zr91,La139,Ce140,Pr141,Nd146,Sm147,Eu153,Gd157,Dy163,Er166,Yb172,Lu175,Hf178,Pb204,Pb206,Pb207,Pb208,Th232,U238	P1n - 1.d
/Users/224742i/Desktop/2019-06-11 GA UPb 7700/ogc - 6.csv	2019-06-12 00:08:04.000	2019-06-12 00:09:48.893	2022-02-28 13:38:37.207	200	22	Si29,Ca43,Ti49,Zr91,La139,Ce140,Pr141,Nd146,Sm147,Eu153,Gd157,Dy163,Er166,Yb172,Lu175,Hf178,Pb204,Pb206,Pb207,Pb208,Th232,U238	ogc - 6.d
/Users/224742i/Desktop/2019-06-11 GA UPb 7700/91500 - 4.csv	2019-06-11 17:19:03.000	2019-06-11 17:20:47.893	2022-02-28 13:38:37.213	200	22	Si29,Ca43,Ti49,Zr91,La139,Ce140,Pr141,Nd146,Sm147,Eu153,Gd157,Dy163,Er166,Yb172,Lu175,Hf178,Pb204,Pb206,Pb207,Pb208,Th232,U238	91500 - 4.d
/Users/224742i/Desktop/2019-06-11 GA UPb 7700/181 - 14.csv	2019-06-11 22:31:52.000	2019-06-11 22:33:36.893	2022-02-28 13:38:37.219	200	22	Si29,Ca43,Ti49,Zr91,La139,Ce140,Pr141,Nd146,Sm147,Eu153,Gd157,Dy163,Er166,Yb172,Lu175,Hf178,Pb204,Pb206,Pb207,Pb208,Th232,U238	181 - 14.d
/Users/224742i/Desktop/2019-06-11 GA UPb 7700/009 - 3.csv	2019-06-12 01:40:21.000	2019-06-12 01:42:05.893	2022-02-28 13:38:37.229	200	22	Si29,Ca43,Ti49,Zr91,La139,Ce140,Pr141,Nd146,Sm147,Eu153,Gd157,Dy163,Er166,Yb172,Lu175,Hf178,Pb204,Pb206,Pb207,Pb208,Th232,U238	009 - 3.d
/Users/224742i/Desktop/2019-06-11 GA UPb 7700/610 - 7.csv	2019-06-12 01:48:50.000	2019-06-12 01:50:34.893	2022-02-28 13:38:37.235	200	22	Si29,Ca43,Ti49,Zr91,La139,Ce140,Pr141,Nd146,Sm147,Eu153,Gd157,Dy163,Er166,Yb172,Lu175,Hf178,Pb204,Pb206,Pb207,Pb208,Th232,U238	610 - 7.d
/Users/224742i/Desktop/2019-06-11 GA UPb 7700/C915 - 21.csv	2019-06-11 17:49:05.000	2019-06-11 17:50:49.893	2022-02-28 13:38:37.286	200	22	Si29,Ca43,Ti49,Zr91,La139,Ce140,Pr141,Nd146,Sm147,Eu153,Gd157,Dy163,Er166,Yb172,Lu175,Hf178,Pb204,Pb206,Pb207,Pb208,Th232,U238	C915 - 21.d
/Users/224742i/Desktop/2019-06-11 GA UPb 7700/009 - 18.csv	2019-06-12 02:34:12.000	2019-06-12 02:35:56.893	2022-02-28 13:38:37.292	200	22	Si29,Ca43,Ti49,Zr91,La139,Ce140,Pr141,Nd146,Sm147,Eu153,Gd157,Dy163,Er166,Yb172,Lu175,Hf178,Pb204,Pb206,Pb207,Pb208,Th232,U238	009 - 18.d
/Users/224742i/Desktop/2019-06-11 GA UPb 7700/009 - 24.csv	2019-06-12 02:46:58.000	2019-06-12 02:48:42.893	2022-02-28 13:38:37.297	200	22	Si29,Ca43,Ti49,Zr91,La139,Ce140,Pr141,Nd146,Sm147,Eu153,Gd157,Dy163,Er166,Yb172,Lu175,Hf178,Pb204,Pb206,Pb207,Pb208,Th232,U238	009 - 24.d
/Users/224742i/Desktop/2019-06-11 GA UPb 7700/FC1 - 7.csv	2019-06-12 01:53:11.000	2019-06-12 01:54:55.893	2022-02-28 13:38:37.307	200	22	Si29,Ca43,Ti49,Zr91,La139,Ce140,Pr141,Nd146,Sm147,Eu153,Gd157,Dy163,Er166,Yb172,Lu175,Hf178,Pb204,Pb206,Pb207,Pb208,Th232,U238	FC1 - 7.d
/Users/224742i/Desktop/2019-06-11 GA UPb 7700/009 - 30.csv	2019-06-12 02:59:41.000	2019-06-12 03:01:25.893	2022-02-28 13:38:37.313	200	22	Si29,Ca43,Ti49,Zr91,La139,Ce140,Pr141,Nd146,Sm147,Eu153,Gd157,Dy163,Er166,Yb172,Lu175,Hf178,Pb204,Pb206,Pb207,Pb208,Th232,U238	009 - 30.d
/Users/224742i/Desktop/2019-06-11 GA UPb 7700/9088 - 1.csv	2019-06-12 04:27:55.000	2019-06-12 04:29:39.893	2022-02-28 13:38:36.373	200	22	Si29,Ca43,Ti49,Zr91,La139,Ce140,Pr141,Nd146,Sm147,Eu153,Gd157,Dy163,Er166,Yb172,Lu175,Hf178,Pb204,Pb206,Pb207,Pb208,Th232,U238	9088 - 1.d
/Users/224742i/Desktop/2019-06-11 GA UPb 7700/9088 - 11.csv	2019-06-12 04:49:09.000	2019-06-12 04:50:53.893	2022-02-28 13:38:37.318	200	22	Si29,Ca43,Ti49,Zr91,La139,Ce140,Pr141,Nd146,Sm147,Eu153,Gd157,Dy163,Er166,Yb172,Lu175,Hf178,Pb204,Pb206,Pb207,Pb208,Th232,U238	9088 - 11.d
/Users/224742i/Desktop/2019-06-11 GA UPb 7700/168 - 28.csv	2019-06-12 01:29:42.000	2019-06-12 01:31:26.892	2022-02-28 13:38:37.328	200	22	Si29,Ca43,Ti49,Zr91,La139,Ce140,Pr141,Nd146,Sm147,Eu153,Gd157,Dy163,Er166,Yb172,Lu175,Hf178,Pb204,Pb206,Pb207,Pb208,Th232,U238	168 - 28.d
/Users/224742i/Desktop/2019-06-11 GA UPb 7700/111 - 1.csv	2019-06-11 20:40:28.000	2019-06-11 20:42:12.893	2022-02-28 13:38:37.336	200	22	Si29,Ca43,Ti49,Zr91,La139,Ce140,Pr141,Nd146,Sm147,Eu153,Gd157,Dy163,Er166,Yb172,Lu175,Hf178,Pb204,Pb206,Pb207,Pb208,Th232,U238	111 - 1.d
/Users/224742i/Desktop/2019-06-11 GA UPb 7700/N915 - 12.csv	2019-06-11 15:55:27.000	2019-06-11 15:57:11.892	2022-02-28 13:38:37.371	200	22	Si29,Ca43,Ti49,Zr91,La139,Ce140,Pr141,Nd146,Sm147,Eu153,Gd157,Dy163,Er166,Yb172,Lu175,Hf178,Pb204,Pb206,Pb207,Pb208,Th232,U238	N915 - 12.d
/Users/224742i/Desktop/2019-06-11 GA UPb 7700/168 - 14.csv	2019-06-12 00:51:07.000	2019-06-12 00:52:51.893	2022-02-28 13:38:37.378	200	22	Si29,Ca43,Ti49,Zr91,La139,Ce140,Pr141,Nd146,Sm147,Eu153,Gd157,Dy163,Er166,Yb172,Lu175,Hf178,Pb204,Pb206,Pb207,Pb208,Th232,U238	168 - 14.d
/Users/224742i/Desktop/2019-06-11 GA UPb 7700/444 - 9.csv	2019-06-11 23:23:08.000	2019-06-11 23:24:52.893	2022-02-28 13:38:37.384	200	22	Si29,Ca43,Ti49,Zr91,La139,Ce140,Pr141,Nd146,Sm147,Eu153,Gd157,Dy163,Er166,Yb172,Lu175,Hf178,Pb204,Pb206,Pb207,Pb208,Th232,U238	444 - 9.d
/Users/224742i/Desktop/2019-06-11 GA UPb 7700/109 - 13.csv	2019-06-11 20:01:38.000	2019-06-11 20:03:22.893	2022-02-28 13:38:37.394	200	22	Si29,Ca43,Ti49,Zr91,La139,Ce140,Pr141,Nd146,Sm147,Eu153,Gd157,Dy163,Er166,Yb172,Lu175,Hf178,Pb204,Pb206,Pb207,Pb208,Th232,U238	109 - 13.d
/Users/224742i/Desktop/2019-06-11 GA UPb 7700/R33 - 17.csv	2019-06-12 06:00:04.000	2019-06-12 06:01:48.893	2022-02-28 13:38:37.401	200	22	Si29,Ca43,Ti49,Zr91,La139,Ce140,Pr141,Nd146,Sm147,Eu153,Gd157,Dy163,Er166,Yb172,Lu175,Hf178,Pb204,Pb206,Pb207,Pb208,Th232,U238	R33 - 17.d
/Users/224742i/Desktop/2019-06-11 GA UPb 7700/111 - 20.csv	2019-06-11 21:29:33.000	2019-06-11 21:31:17.893	2022-02-28 13:38:37.412	200	22	Si29,Ca43,Ti49,Zr91,La139,Ce140,Pr141,Nd146,Sm147,Eu153,Gd157,Dy163,Er166,Yb172,Lu175,Hf178,Pb204,Pb206,Pb207,Pb208,Th232,U238	111 - 20.d
/Users/224742i/Desktop/2019-06-11 GA UPb 7700/9119 - 12.csv	2019-06-12 03:33:56.000	2019-06-12 03:35:40.893	2022-02-28 13:38:37.418	200	22	Si29,Ca43,Ti49,Zr91,La139,Ce140,Pr141,Nd146,Sm147,Eu153,Gd157,Dy163,Er166,Yb172,Lu175,Hf178,Pb204,Pb206,Pb207,Pb208,Th232,U238	9119 - 12.d
/Users/224742i/Desktop/2019-06-11 GA UPb 7700/168 - 4.csv	2019-06-12 00:29:55.000	2019-06-12 00:31:39.893	2022-02-28 13:38:36.377	200	22	Si29,Ca43,Ti49,Zr91,La139,Ce140,Pr141,Nd146,Sm147,Eu153,Gd157,Dy163,Er166,Yb172,Lu175,Hf178,Pb204,Pb206,Pb207,Pb208,Th232,U238	168 - 4.d
/Users/224742i/Desktop/2019-06-11 GA UPb 7700/612 - 5.csv	2019-06-11 22:14:27.000	2019-06-11 22:16:11.893	2022-02-28 13:38:37.424	200	22	Si29,Ca43,Ti49,Zr91,La139,Ce140,Pr141,Nd146,Sm147,Eu153,Gd157,Dy163,Er166,Yb172,Lu175,Hf178,Pb204,Pb206,Pb207,Pb208,Th232,U238	612 - 5.d
/Users/224742i/Desktop/2019-06-11 GA UPb 7700/095 - 6.csv	2019-06-11 18:29:43.000	2019-06-11 18:31:27.893	2022-02-28 13:38:37.473	200	22	Si29,Ca43,Ti49,Zr91,La139,Ce140,Pr141,Nd146,Sm147,Eu153,Gd157,Dy163,Er166,Yb172,Lu175,Hf178,Pb204,Pb206,Pb207,Pb208,Th232,U238	095 - 6.d
/Users/224742i/Desktop/2019-06-11 GA UPb 7700/109 - 7.csv	2019-06-11 19:48:53.000	2019-06-11 19:50:37.893	2022-02-28 13:38:37.480	200	22	Si29,Ca43,Ti49,Zr91,La139,Ce140,Pr141,Nd146,Sm147,Eu153,Gd157,Dy163,Er166,Yb172,Lu175,Hf178,Pb204,Pb206,Pb207,Pb208,Th232,U238	109 - 7.d
/Users/224742i/Desktop/2019-06-11 GA UPb 7700/444 - 20.csv	2019-06-11 23:48:47.000	2019-06-11 23:50:31.893	2022-02-28 13:38:37.490	200	22	Si29,Ca43,Ti49,Zr91,La139,Ce140,Pr141,Nd146,Sm147,Eu153,Gd157,Dy163,Er166,Yb172,Lu175,Hf178,Pb204,Pb206,Pb207,Pb208,Th232,U238	444 - 20.d
/Users/224742i/Desktop/2019-06-11 GA UPb 7700/C915 - 3.csv	2019-06-11 17:01:56.000	2019-06-11 17:03:40.893	2022-02-28 13:38:37.498	200	22	Si29,Ca43,Ti49,Zr91,La139,Ce140,Pr141,Nd146,Sm147,Eu153,Gd157,Dy163,Er166,Yb172,Lu175,Hf178,Pb204,Pb206,Pb207,Pb208,Th232,U238	C915 - 3.d
/Users/224742i/Desktop/2019-06-11 GA UPb 7700/C915 - 2.csv	2019-06-11 16:46:47.000	2019-06-11 16:48:31.893	2022-02-28 13:38:37.504	200	22	Si29,Ca43,Ti49,Zr91,La139,Ce140,Pr141,Nd146,Sm147,Eu153,Gd157,Dy163,Er166,Yb172,Lu175,Hf178,Pb204,Pb206,Pb207,Pb208,Th232,U238	C915 - 2.d
/Users/224742i/Desktop/2019-06-11 GA UPb 7700/444 - 21.csv	2019-06-11 23:50:56.000	2019-06-11 23:52:40.893	2022-02-28 13:38:37.515	200	22	Si29,Ca43,Ti49,Zr91,La139,Ce140,Pr141,Nd146,Sm147,Eu153,Gd157,Dy163,Er166,Yb172,Lu175,Hf178,Pb204,Pb206,Pb207,Pb208,Th232,U238	444 - 21.d
/Users/224742i/Desktop/2019-06-11 GA UPb 7700/109 - 6.csv	2019-06-11 19:46:48.000	2019-06-11 19:48:32.892	2022-02-28 13:38:37.521	200	22	Si29,Ca43,Ti49,Zr91,La139,Ce140,Pr141,Nd146,Sm147,Eu153,Gd157,Dy163,Er166,Yb172,Lu175,Hf178,Pb204,Pb206,Pb207,Pb208,Th232,U238	109 - 6.d
/Users/224742i/Desktop/2019-06-11 GA UPb 7700/612 - 4.csv	2019-06-11 20:27:24.000	2019-06-11 20:29:08.893	2022-02-28 13:38:37.529	200	22	Si29,Ca43,Ti49,Zr91,La139,Ce140,Pr141,Nd146,Sm147,Eu153,Gd157,Dy163,Er166,Yb172,Lu175,Hf178,Pb204,Pb206,Pb207,Pb208,Th232,U238	612 - 4.d
/Users/224742i/Desktop/2019-06-11 GA UPb 7700/095 - 7.csv	2019-06-11 18:31:47.000	2019-06-11 18:33:31.893	2022-02-28 13:38:37.551	200	22	Si29,Ca43,Ti49,Zr91,La139,Ce140,Pr141,Nd146,Sm147,Eu153,Gd157,Dy163,Er166,Yb172,Lu175,Hf178,Pb204,Pb206,Pb207,Pb208,Th232,U238	095 - 7.d
/Users/224742i/Desktop/2019-06-11 GA UPb 7700/095 - 15.csv	2019-06-11 19:01:54.000	2019-06-11 19:03:38.893	2022-02-28 13:38:36.381	200	22	Si29,Ca43,Ti49,Zr91,La139,Ce140,Pr141,Nd146,Sm147,Eu153,Gd157,Dy163,Er166,Yb172,Lu175,Hf178,Pb204,Pb206,Pb207,Pb208,Th232,U238	095 - 15.d
/Users/224742i/Desktop/2019-06-11 GA UPb 7700/9119 - 13.csv	2019-06-12 03:49:08.000	2019-06-12 03:50:52.893	2022-02-28 13:38:37.557	200	22	Si29,Ca43,Ti49,Zr91,La139,Ce140,Pr141,Nd146,Sm147,Eu153,Gd157,Dy163,Er166,Yb172,Lu175,Hf178,Pb204,Pb206,Pb207,Pb208,Th232,U238	9119 - 13.d
/Users/224742i/Desktop/2019-06-11 GA UPb 7700/111 - 21.csv	2019-06-11 21:31:39.000	2019-06-11 21:33:23.893	2022-02-28 13:38:37.568	200	22	Si29,Ca43,Ti49,Zr91,La139,Ce140,Pr141,Nd146,Sm147,Eu153,Gd157,Dy163,Er166,Yb172,Lu175,Hf178,Pb204,Pb206,Pb207,Pb208,Th232,U238	111 - 21.d
/Users/224742i/Desktop/2019-06-11 GA UPb 7700/R33 - 16.csv	2019-06-12 05:06:13.000	2019-06-12 05:07:57.893	2022-02-28 13:38:37.575	200	22	Si29,Ca43,Ti49,Zr91,La139,Ce140,Pr141,Nd146,Sm147,Eu153,Gd157,Dy163,Er166,Yb172,Lu175,Hf178,Pb204,Pb206,Pb207,Pb208,Th232,U238	R33 - 16.d
/Users/224742i/Desktop/2019-06-11 GA UPb 7700/109 - 12.csv	2019-06-11 19:59:32.000	2019-06-11 20:01:16.893	2022-02-28 13:38:37.581	200	22	Si29,Ca43,Ti49,Zr91,La139,Ce140,Pr141,Nd146,Sm147,Eu153,Gd157,Dy163,Er166,Yb172,Lu175,Hf178,Pb204,Pb206,Pb207,Pb208,Th232,U238	109 - 12.d
/Users/224742i/Desktop/2019-06-11 GA UPb 7700/mud - 1.csv	2019-06-11 15:18:54.000	2019-06-11 15:20:38.893	2022-02-28 13:38:37.593	200	22	Si29,Ca43,Ti49,Zr91,La139,Ce140,Pr141,Nd146,Sm147,Eu153,Gd157,Dy163,Er166,Yb172,Lu175,Hf178,Pb204,Pb206,Pb207,Pb208,Th232,U238	mud - 1.d
/Users/224742i/Desktop/2019-06-11 GA UPb 7700/444 - 8.csv	2019-06-11 23:21:03.000	2019-06-11 23:22:47.893	2022-02-28 13:38:37.599	200	22	Si29,Ca43,Ti49,Zr91,La139,Ce140,Pr141,Nd146,Sm147,Eu153,Gd157,Dy163,Er166,Yb172,Lu175,Hf178,Pb204,Pb206,Pb207,Pb208,Th232,U238	444 - 8.d
/Users/224742i/Desktop/2019-06-11 GA UPb 7700/168 - 15.csv	2019-06-12 00:53:12.000	2019-06-12 00:54:56.893	2022-02-28 13:38:37.612	200	22	Si29,Ca43,Ti49,Zr91,La139,Ce140,Pr141,Nd146,Sm147,Eu153,Gd157,Dy163,Er166,Yb172,Lu175,Hf178,Pb204,Pb206,Pb207,Pb208,Th232,U238	168 - 15.d
/Users/224742i/Desktop/2019-06-11 GA UPb 7700/N915 - 1.csv	2019-06-11 15:31:55.000	2019-06-11 15:33:39.893	2022-02-28 13:38:37.663	200	22	Si29,Ca43,Ti49,Zr91,La139,Ce140,Pr141,Nd146,Sm147,Eu153,Gd157,Dy163,Er166,Yb172,Lu175,Hf178,Pb204,Pb206,Pb207,Pb208,Th232,U238	N915 - 1.d
/Users/224742i/Desktop/2019-06-11 GA UPb 7700/N915 - 13.csv	2019-06-11 15:57:33.000	2019-06-11 15:59:17.893	2022-02-28 13:38:37.670	200	22	Si29,Ca43,Ti49,Zr91,La139,Ce140,Pr141,Nd146,Sm147,Eu153,Gd157,Dy163,Er166,Yb172,Lu175,Hf178,Pb204,Pb206,Pb207,Pb208,Th232,U238	N915 - 13.d
/Users/224742i/Desktop/2019-06-11 GA UPb 7700/168 - 29.csv	2019-06-12 01:31:48.000	2019-06-12 01:33:32.893	2022-02-28 13:38:37.682	200	22	Si29,Ca43,Ti49,Zr91,La139,Ce140,Pr141,Nd146,Sm147,Eu153,Gd157,Dy163,Er166,Yb172,Lu175,Hf178,Pb204,Pb206,Pb207,Pb208,Th232,U238	168 - 29.d
/Users/224742i/Desktop/2019-06-11 GA UPb 7700/gj - 7.csv	2019-06-11 20:10:11.000	2019-06-11 20:11:55.893	2022-02-28 13:38:36.385	200	22	Si29,Ca43,Ti49,Zr91,La139,Ce140,Pr141,Nd146,Sm147,Eu153,Gd157,Dy163,Er166,Yb172,Lu175,Hf178,Pb204,Pb206,Pb207,Pb208,Th232,U238	gj - 7.d
/Users/224742i/Desktop/2019-06-11 GA UPb 7700/9088 - 10.csv	2019-06-12 04:47:04.000	2019-06-12 04:48:48.892	2022-02-28 13:38:37.689	200	22	Si29,Ca43,Ti49,Zr91,La139,Ce140,Pr141,Nd146,Sm147,Eu153,Gd157,Dy163,Er166,Yb172,Lu175,Hf178,Pb204,Pb206,Pb207,Pb208,Th232,U238	9088 - 10.d
/Users/224742i/Desktop/2019-06-11 GA UPb 7700/9088 - 12.csv	2019-06-12 04:51:18.000	2019-06-12 04:53:02.893	2022-02-28 13:38:37.700	200	22	Si29,Ca43,Ti49,Zr91,La139,Ce140,Pr141,Nd146,Sm147,Eu153,Gd157,Dy163,Er166,Yb172,Lu175,Hf178,Pb204,Pb206,Pb207,Pb208,Th232,U238	9088 - 12.d
/Users/224742i/Desktop/2019-06-11 GA UPb 7700/111 - 2.csv	2019-06-11 20:42:38.000	2019-06-11 20:44:22.893	2022-02-28 13:38:37.707	200	22	Si29,Ca43,Ti49,Zr91,La139,Ce140,Pr141,Nd146,Sm147,Eu153,Gd157,Dy163,Er166,Yb172,Lu175,Hf178,Pb204,Pb206,Pb207,Pb208,Th232,U238	111 - 2.d
/Users/224742i/Desktop/2019-06-11 GA UPb 7700/168 - 17.csv	2019-06-12 00:57:27.000	2019-06-12 00:59:11.893	2022-02-28 13:38:37.713	200	22	Si29,Ca43,Ti49,Zr91,La139,Ce140,Pr141,Nd146,Sm147,Eu153,Gd157,Dy163,Er166,Yb172,Lu175,Hf178,Pb204,Pb206,Pb207,Pb208,Th232,U238	168 - 17.d
/Users/224742i/Desktop/2019-06-11 GA UPb 7700/N915 - 11.csv	2019-06-11 15:53:18.000	2019-06-11 15:55:02.893	2022-02-28 13:38:37.725	200	22	Si29,Ca43,Ti49,Zr91,La139,Ce140,Pr141,Nd146,Sm147,Eu153,Gd157,Dy163,Er166,Yb172,Lu175,Hf178,Pb204,Pb206,Pb207,Pb208,Th232,U238	N915 - 11.d
/Users/224742i/Desktop/2019-06-11 GA UPb 7700/N915 - 3.csv	2019-06-11 15:36:19.000	2019-06-11 15:38:03.893	2022-02-28 13:38:37.748	200	22	Si29,Ca43,Ti49,Zr91,La139,Ce140,Pr141,Nd146,Sm147,Eu153,Gd157,Dy163,Er166,Yb172,Lu175,Hf178,Pb204,Pb206,Pb207,Pb208,Th232,U238	N915 - 3.d
/Users/224742i/Desktop/2019-06-11 GA UPb 7700/mud - 3.csv	2019-06-11 16:18:53.000	2019-06-11 16:20:37.893	2022-02-28 13:38:37.761	200	22	Si29,Ca43,Ti49,Zr91,La139,Ce140,Pr141,Nd146,Sm147,Eu153,Gd157,Dy163,Er166,Yb172,Lu175,Hf178,Pb204,Pb206,Pb207,Pb208,Th232,U238	mud - 3.d
/Users/224742i/Desktop/2019-06-11 GA UPb 7700/109 - 10.csv	2019-06-11 19:55:17.000	2019-06-11 19:57:01.893	2022-02-28 13:38:37.768	200	22	Si29,Ca43,Ti49,Zr91,La139,Ce140,Pr141,Nd146,Sm147,Eu153,Gd157,Dy163,Er166,Yb172,Lu175,Hf178,Pb204,Pb206,Pb207,Pb208,Th232,U238	109 - 10.d
/Users/224742i/Desktop/2019-06-11 GA UPb 7700/R33 - 14.csv	2019-06-12 03:08:17.000	2019-06-12 03:10:01.893	2022-02-28 13:38:37.774	200	22	Si29,Ca43,Ti49,Zr91,La139,Ce140,Pr141,Nd146,Sm147,Eu153,Gd157,Dy163,Er166,Yb172,Lu175,Hf178,Pb204,Pb206,Pb207,Pb208,Th232,U238	R33 - 14.d
/Users/224742i/Desktop/2019-06-11 GA UPb 7700/111 - 23.csv	2019-06-11 21:35:54.000	2019-06-11 21:37:38.893	2022-02-28 13:38:37.787	200	22	Si29,Ca43,Ti49,Zr91,La139,Ce140,Pr141,Nd146,Sm147,Eu153,Gd157,Dy163,Er166,Yb172,Lu175,Hf178,Pb204,Pb206,Pb207,Pb208,Th232,U238	111 - 23.d
/Users/224742i/Desktop/2019-06-11 GA UPb 7700/gj - 6.csv	2019-06-11 19:16:50.000	2019-06-11 19:18:34.893	2022-02-28 13:38:36.388	200	22	Si29,Ca43,Ti49,Zr91,La139,Ce140,Pr141,Nd146,Sm147,Eu153,Gd157,Dy163,Er166,Yb172,Lu175,Hf178,Pb204,Pb206,Pb207,Pb208,Th232,U238	gj - 6.d
/Users/224742i/Desktop/2019-06-11 GA UPb 7700/91500 - 18.csv	2019-06-12 06:02:14.000	2019-06-12 06:03:58.893	2022-02-28 13:38:37.793	200	22	Si29,Ca43,Ti49,Zr91,La139,Ce140,Pr141,Nd146,Sm147,Eu153,Gd157,Dy163,Er166,Yb172,Lu175,Hf178,Pb204,Pb206,Pb207,Pb208,Th232,U238	91500 - 18.d
/Users/224742i/Desktop/2019-06-11 GA UPb 7700/9119 - 11.csv	2019-06-12 03:31:47.000	2019-06-12 03:33:31.893	2022-02-28 13:38:37.799	200	22	Si29,Ca43,Ti49,Zr91,La139,Ce140,Pr141,Nd146,Sm147,Eu153,Gd157,Dy163,Er166,Yb172,Lu175,Hf178,Pb204,Pb206,Pb207,Pb208,Th232,U238	9119 - 11.d
/Users/224742i/Desktop/2019-06-11 GA UPb 7700/109 - 4.csv	2019-06-11 19:42:34.000	2019-06-11 19:44:18.893	2022-02-28 13:38:37.812	200	22	Si29,Ca43,Ti49,Zr91,La139,Ce140,Pr141,Nd146,Sm147,Eu153,Gd157,Dy163,Er166,Yb172,Lu175,Hf178,Pb204,Pb206,Pb207,Pb208,Th232,U238	109 - 4.d
/Users/224742i/Desktop/2019-06-11 GA UPb 7700/gj - 18.csv	2019-06-12 06:04:28.000	2019-06-12 06:06:12.893	2022-02-28 13:38:37.858	200	22	Si29,Ca43,Ti49,Zr91,La139,Ce140,Pr141,Nd146,Sm147,Eu153,Gd157,Dy163,Er166,Yb172,Lu175,Hf178,Pb204,Pb206,Pb207,Pb208,Th232,U238	gj - 18.d
/Users/224742i/Desktop/2019-06-11 GA UPb 7700/095 - 5.csv	2019-06-11 18:27:32.000	2019-06-11 18:29:16.893	2022-02-28 13:38:37.870	200	22	Si29,Ca43,Ti49,Zr91,La139,Ce140,Pr141,Nd146,Sm147,Eu153,Gd157,Dy163,Er166,Yb172,Lu175,Hf178,Pb204,Pb206,Pb207,Pb208,Th232,U238	095 - 5.d
/Users/224742i/Desktop/2019-06-11 GA UPb 7700/612 - 6.csv	2019-06-12 00:03:47.000	2019-06-12 00:05:31.893	2022-02-28 13:38:37.877	200	22	Si29,Ca43,Ti49,Zr91,La139,Ce140,Pr141,Nd146,Sm147,Eu153,Gd157,Dy163,Er166,Yb172,Lu175,Hf178,Pb204,Pb206,Pb207,Pb208,Th232,U238	612 - 6.d
/Users/224742i/Desktop/2019-06-11 GA UPb 7700/444 - 23.csv	2019-06-11 23:55:12.000	2019-06-11 23:56:56.893	2022-02-28 13:38:37.884	200	22	Si29,Ca43,Ti49,Zr91,La139,Ce140,Pr141,Nd146,Sm147,Eu153,Gd157,Dy163,Er166,Yb172,Lu175,Hf178,Pb204,Pb206,Pb207,Pb208,Th232,U238	444 - 23.d
/Users/224742i/Desktop/2019-06-11 GA UPb 7700/444 - 22.csv	2019-06-11 23:53:02.000	2019-06-11 23:54:46.893	2022-02-28 13:38:37.898	200	22	Si29,Ca43,Ti49,Zr91,La139,Ce140,Pr141,Nd146,Sm147,Eu153,Gd157,Dy163,Er166,Yb172,Lu175,Hf178,Pb204,Pb206,Pb207,Pb208,Th232,U238	444 - 22.d
/Users/224742i/Desktop/2019-06-11 GA UPb 7700/C915 - 1.csv	2019-06-11 16:44:38.000	2019-06-11 16:46:22.893	2022-02-28 13:38:37.905	200	22	Si29,Ca43,Ti49,Zr91,La139,Ce140,Pr141,Nd146,Sm147,Eu153,Gd157,Dy163,Er166,Yb172,Lu175,Hf178,Pb204,Pb206,Pb207,Pb208,Th232,U238	C915 - 1.d
/Users/224742i/Desktop/2019-06-11 GA UPb 7700/095 - 4.csv	2019-06-11 18:25:28.000	2019-06-11 18:27:12.893	2022-02-28 13:38:37.919	200	22	Si29,Ca43,Ti49,Zr91,La139,Ce140,Pr141,Nd146,Sm147,Eu153,Gd157,Dy163,Er166,Yb172,Lu175,Hf178,Pb204,Pb206,Pb207,Pb208,Th232,U238	095 - 4.d
/Users/224742i/Desktop/2019-06-11 GA UPb 7700/168 - 5.csv	2019-06-12 00:32:00.000	2019-06-12 00:33:44.893	2022-02-28 13:38:36.392	200	22	Si29,Ca43,Ti49,Zr91,La139,Ce140,Pr141,Nd146,Sm147,Eu153,Gd157,Dy163,Er166,Yb172,Lu175,Hf178,Pb204,Pb206,Pb207,Pb208,Th232,U238	168 - 5.d
/Users/224742i/Desktop/2019-06-11 GA UPb 7700/612 - 7.csv	2019-06-12 01:51:04.000	2019-06-12 01:52:48.893	2022-02-28 13:38:37.928	200	22	Si29,Ca43,Ti49,Zr91,La139,Ce140,Pr141,Nd146,Sm147,Eu153,Gd157,Dy163,Er166,Yb172,Lu175,Hf178,Pb204,Pb206,Pb207,Pb208,Th232,U238	612 - 7.d
/Users/224742i/Desktop/2019-06-11 GA UPb 7700/109 - 5.csv	2019-06-11 19:44:38.000	2019-06-11 19:46:22.892	2022-02-28 13:38:37.951	200	22	Si29,Ca43,Ti49,Zr91,La139,Ce140,Pr141,Nd146,Sm147,Eu153,Gd157,Dy163,Er166,Yb172,Lu175,Hf178,Pb204,Pb206,Pb207,Pb208,Th232,U238	109 - 5.d
/Users/224742i/Desktop/2019-06-11 GA UPb 7700/9119 - 10.csv	2019-06-12 03:29:41.000	2019-06-12 03:31:25.893	2022-02-28 13:38:37.966	200	22	Si29,Ca43,Ti49,Zr91,La139,Ce140,Pr141,Nd146,Sm147,Eu153,Gd157,Dy163,Er166,Yb172,Lu175,Hf178,Pb204,Pb206,Pb207,Pb208,Th232,U238	9119 - 10.d
/Users/224742i/Desktop/2019-06-11 GA UPb 7700/111 - 22.csv	2019-06-11 21:33:48.000	2019-06-11 21:35:32.892	2022-02-28 13:38:37.975	200	22	Si29,Ca43,Ti49,Zr91,La139,Ce140,Pr141,Nd146,Sm147,Eu153,Gd157,Dy163,Er166,Yb172,Lu175,Hf178,Pb204,Pb206,Pb207,Pb208,Th232,U238	111 - 22.d
/Users/224742i/Desktop/2019-06-11 GA UPb 7700/R33 - 15.csv	2019-06-12 04:15:00.000	2019-06-12 04:16:44.893	2022-02-28 13:38:37.988	200	22	Si29,Ca43,Ti49,Zr91,La139,Ce140,Pr141,Nd146,Sm147,Eu153,Gd157,Dy163,Er166,Yb172,Lu175,Hf178,Pb204,Pb206,Pb207,Pb208,Th232,U238	R33 - 15.d
/Users/224742i/Desktop/2019-06-11 GA UPb 7700/109 - 11.csv	2019-06-11 19:57:22.000	2019-06-11 19:59:06.893	2022-02-28 13:38:37.995	200	22	Si29,Ca43,Ti49,Zr91,La139,Ce140,Pr141,Nd146,Sm147,Eu153,Gd157,Dy163,Er166,Yb172,Lu175,Hf178,Pb204,Pb206,Pb207,Pb208,Th232,U238	109 - 11.d
/Users/224742i/Desktop/2019-06-11 GA UPb 7700/mud - 2.csv	2019-06-11 15:27:35.000	2019-06-11 15:29:19.893	2022-02-28 13:38:38.003	200	22	Si29,Ca43,Ti49,Zr91,La139,Ce140,Pr141,Nd146,Sm147,Eu153,Gd157,Dy163,Er166,Yb172,Lu175,Hf178,Pb204,Pb206,Pb207,Pb208,Th232,U238	mud - 2.d
/Users/224742i/Desktop/2019-06-11 GA UPb 7700/N915 - 10.csv	2019-06-11 15:51:13.000	2019-06-11 15:52:57.893	2022-02-28 13:38:38.017	200	22	Si29,Ca43,Ti49,Zr91,La139,Ce140,Pr141,Nd146,Sm147,Eu153,Gd157,Dy163,Er166,Yb172,Lu175,Hf178,Pb204,Pb206,Pb207,Pb208,Th232,U238	N915 - 10.d
/Users/224742i/Desktop/2019-06-11 GA UPb 7700/N915 - 2.csv	2019-06-11 15:34:14.000	2019-06-11 15:35:58.893	2022-02-28 13:38:38.025	200	22	Si29,Ca43,Ti49,Zr91,La139,Ce140,Pr141,Nd146,Sm147,Eu153,Gd157,Dy163,Er166,Yb172,Lu175,Hf178,Pb204,Pb206,Pb207,Pb208,Th232,U238	N915 - 2.d
/Users/224742i/Desktop/2019-06-11 GA UPb 7700/168 - 16.csv	2019-06-12 00:55:22.000	2019-06-12 00:57:06.893	2022-02-28 13:38:38.079	200	22	Si29,Ca43,Ti49,Zr91,La139,Ce140,Pr141,Nd146,Sm147,Eu153,Gd157,Dy163,Er166,Yb172,Lu175,Hf178,Pb204,Pb206,Pb207,Pb208,Th232,U238	168 - 16.d
/Users/224742i/Desktop/2019-06-11 GA UPb 7700/095 - 14.csv	2019-06-11 18:59:49.000	2019-06-11 19:01:33.893	2022-02-28 13:38:36.426	200	22	Si29,Ca43,Ti49,Zr91,La139,Ce140,Pr141,Nd146,Sm147,Eu153,Gd157,Dy163,Er166,Yb172,Lu175,Hf178,Pb204,Pb206,Pb207,Pb208,Th232,U238	095 - 14.d
/Users/224742i/Desktop/2019-06-11 GA UPb 7700/111 - 3.csv	2019-06-11 20:44:43.000	2019-06-11 20:46:27.893	2022-02-28 13:38:38.086	200	22	Si29,Ca43,Ti49,Zr91,La139,Ce140,Pr141,Nd146,Sm147,Eu153,Gd157,Dy163,Er166,Yb172,Lu175,Hf178,Pb204,Pb206,Pb207,Pb208,Th232,U238	111 - 3.d
/Users/224742i/Desktop/2019-06-11 GA UPb 7700/9088 - 13.csv	2019-06-12 04:53:24.000	2019-06-12 04:55:08.893	2022-02-28 13:38:38.093	200	22	Si29,Ca43,Ti49,Zr91,La139,Ce140,Pr141,Nd146,Sm147,Eu153,Gd157,Dy163,Er166,Yb172,Lu175,Hf178,Pb204,Pb206,Pb207,Pb208,Th232,U238	9088 - 13.d
/Users/224742i/Desktop/2019-06-11 GA UPb 7700/9088 - 17.csv	2019-06-12 05:10:39.000	2019-06-12 05:12:23.893	2022-02-28 13:38:38.108	200	22	Si29,Ca43,Ti49,Zr91,La139,Ce140,Pr141,Nd146,Sm147,Eu153,Gd157,Dy163,Er166,Yb172,Lu175,Hf178,Pb204,Pb206,Pb207,Pb208,Th232,U238	9088 - 17.d
/Users/224742i/Desktop/2019-06-11 GA UPb 7700/168 - 12.csv	2019-06-12 00:46:53.000	2019-06-12 00:48:37.893	2022-02-28 13:38:38.115	200	22	Si29,Ca43,Ti49,Zr91,La139,Ce140,Pr141,Nd146,Sm147,Eu153,Gd157,Dy163,Er166,Yb172,Lu175,Hf178,Pb204,Pb206,Pb207,Pb208,Th232,U238	168 - 12.d
/Users/224742i/Desktop/2019-06-11 GA UPb 7700/N915 - 6.csv	2019-06-11 15:42:43.000	2019-06-11 15:44:27.893	2022-02-28 13:38:38.122	200	22	Si29,Ca43,Ti49,Zr91,La139,Ce140,Pr141,Nd146,Sm147,Eu153,Gd157,Dy163,Er166,Yb172,Lu175,Hf178,Pb204,Pb206,Pb207,Pb208,Th232,U238	N915 - 6.d
/Users/224742i/Desktop/2019-06-11 GA UPb 7700/N915 - 14.csv	2019-06-11 15:59:42.000	2019-06-11 16:01:26.893	2022-02-28 13:38:38.137	200	22	Si29,Ca43,Ti49,Zr91,La139,Ce140,Pr141,Nd146,Sm147,Eu153,Gd157,Dy163,Er166,Yb172,Lu175,Hf178,Pb204,Pb206,Pb207,Pb208,Th232,U238	N915 - 14.d
/Users/224742i/Desktop/2019-06-11 GA UPb 7700/111 - 7.csv	2019-06-11 20:53:11.000	2019-06-11 20:54:55.893	2022-02-28 13:38:38.144	200	22	Si29,Ca43,Ti49,Zr91,La139,Ce140,Pr141,Nd146,Sm147,Eu153,Gd157,Dy163,Er166,Yb172,Lu175,Hf178,Pb204,Pb206,Pb207,Pb208,Th232,U238	111 - 7.d
/Users/224742i/Desktop/2019-06-11 GA UPb 7700/N915 - 28.csv	2019-06-11 16:38:16.000	2019-06-11 16:40:00.892	2022-02-28 13:38:38.173	200	22	Si29,Ca43,Ti49,Zr91,La139,Ce140,Pr141,Nd146,Sm147,Eu153,Gd157,Dy163,Er166,Yb172,Lu175,Hf178,Pb204,Pb206,Pb207,Pb208,Th232,U238	N915 - 28.d
/Users/224742i/Desktop/2019-06-11 GA UPb 7700/mud - 6.csv	2019-06-11 19:21:08.000	2019-06-11 19:22:52.893	2022-02-28 13:38:38.181	200	22	Si29,Ca43,Ti49,Zr91,La139,Ce140,Pr141,Nd146,Sm147,Eu153,Gd157,Dy163,Er166,Yb172,Lu175,Hf178,Pb204,Pb206,Pb207,Pb208,Th232,U238	mud - 6.d
/Users/224742i/Desktop/2019-06-11 GA UPb 7700/ples - 9.csv	2019-06-12 05:36:25.000	2019-06-12 05:38:09.893	2022-02-28 13:38:38.188	200	22	Si29,Ca43,Ti49,Zr91,La139,Ce140,Pr141,Nd146,Sm147,Eu153,Gd157,Dy163,Er166,Yb172,Lu175,Hf178,Pb204,Pb206,Pb207,Pb208,Th232,U238	ples - 9.d
/Users/224742i/Desktop/2019-06-11 GA UPb 7700/ogc - 3.csv	2019-06-11 18:42:33.000	2019-06-11 18:44:17.893	2022-02-28 13:38:36.429	200	22	Si29,Ca43,Ti49,Zr91,La139,Ce140,Pr141,Nd146,Sm147,Eu153,Gd157,Dy163,Er166,Yb172,Lu175,Hf178,Pb204,Pb206,Pb207,Pb208,Th232,U238	ogc - 3.d
/Users/224742i/Desktop/2019-06-11 GA UPb 7700/109 - 15.csv	2019-06-11 20:05:54.000	2019-06-11 20:07:38.893	2022-02-28 13:38:38.204	200	22	Si29,Ca43,Ti49,Zr91,La139,Ce140,Pr141,Nd146,Sm147,Eu153,Gd157,Dy163,Er166,Yb172,Lu175,Hf178,Pb204,Pb206,Pb207,Pb208,Th232,U238	109 - 15.d
/Users/224742i/Desktop/2019-06-11 GA UPb 7700/R33 - 11.csv	2019-06-12 00:21:09.000	2019-06-12 00:22:53.893	2022-02-28 13:38:38.214	200	22	Si29,Ca43,Ti49,Zr91,La139,Ce140,Pr141,Nd146,Sm147,Eu153,Gd157,Dy163,Er166,Yb172,Lu175,Hf178,Pb204,Pb206,Pb207,Pb208,Th232,U238	R33 - 11.d
/Users/224742i/Desktop/2019-06-11 GA UPb 7700/9119 - 14.csv	2019-06-12 03:51:23.000	2019-06-12 03:53:07.893	2022-02-28 13:38:38.230	200	22	Si29,Ca43,Ti49,Zr91,La139,Ce140,Pr141,Nd146,Sm147,Eu153,Gd157,Dy163,Er166,Yb172,Lu175,Hf178,Pb204,Pb206,Pb207,Pb208,Th232,U238	9119 - 14.d
/Users/224742i/Desktop/2019-06-11 GA UPb 7700/C915 - 5.csv	2019-06-11 17:06:18.000	2019-06-11 17:08:02.893	2022-02-28 13:38:38.238	200	22	Si29,Ca43,Ti49,Zr91,La139,Ce140,Pr141,Nd146,Sm147,Eu153,Gd157,Dy163,Er166,Yb172,Lu175,Hf178,Pb204,Pb206,Pb207,Pb208,Th232,U238	C915 - 5.d
/Users/224742i/Desktop/2019-06-11 GA UPb 7700/109 - 1.csv	2019-06-11 19:36:08.000	2019-06-11 19:37:52.893	2022-02-28 13:38:38.245	200	22	Si29,Ca43,Ti49,Zr91,La139,Ce140,Pr141,Nd146,Sm147,Eu153,Gd157,Dy163,Er166,Yb172,Lu175,Hf178,Pb204,Pb206,Pb207,Pb208,Th232,U238	109 - 1.d
/Users/224742i/Desktop/2019-06-11 GA UPb 7700/612 - 3.csv	2019-06-11 18:38:15.000	2019-06-11 18:39:59.893	2022-02-28 13:38:38.301	200	22	Si29,Ca43,Ti49,Zr91,La139,Ce140,Pr141,Nd146,Sm147,Eu153,Gd157,Dy163,Er166,Yb172,Lu175,Hf178,Pb204,Pb206,Pb207,Pb208,Th232,U238	612 - 3.d
/Users/224742i/Desktop/2019-06-11 GA UPb 7700/612 - 2.csv	2019-06-11 16:51:05.000	2019-06-11 16:52:49.893	2022-02-28 13:38:38.309	200	22	Si29,Ca43,Ti49,Zr91,La139,Ce140,Pr141,Nd146,Sm147,Eu153,Gd157,Dy163,Er166,Yb172,Lu175,Hf178,Pb204,Pb206,Pb207,Pb208,Th232,U238	612 - 2.d
/Users/224742i/Desktop/2019-06-11 GA UPb 7700/095 - 1.csv	2019-06-11 18:19:00.000	2019-06-11 18:20:44.893	2022-02-28 13:38:38.323	200	22	Si29,Ca43,Ti49,Zr91,La139,Ce140,Pr141,Nd146,Sm147,Eu153,Gd157,Dy163,Er166,Yb172,Lu175,Hf178,Pb204,Pb206,Pb207,Pb208,Th232,U238	095 - 1.d
/Users/224742i/Desktop/2019-06-11 GA UPb 7700/C915 - 4.csv	2019-06-11 17:04:14.000	2019-06-11 17:05:58.893	2022-02-28 13:38:38.333	200	22	Si29,Ca43,Ti49,Zr91,La139,Ce140,Pr141,Nd146,Sm147,Eu153,Gd157,Dy163,Er166,Yb172,Lu175,Hf178,Pb204,Pb206,Pb207,Pb208,Th232,U238	C915 - 4.d
/Users/224742i/Desktop/2019-06-11 GA UPb 7700/9119 - 15.csv	2019-06-12 03:53:29.000	2019-06-12 03:55:13.893	2022-02-28 13:38:38.340	200	22	Si29,Ca43,Ti49,Zr91,La139,Ce140,Pr141,Nd146,Sm147,Eu153,Gd157,Dy163,Er166,Yb172,Lu175,Hf178,Pb204,Pb206,Pb207,Pb208,Th232,U238	9119 - 15.d
/Users/224742i/Desktop/2019-06-11 GA UPb 7700/181 - 11.csv	2019-06-11 22:25:25.000	2019-06-11 22:27:09.893	2022-02-28 13:38:36.432	200	22	Si29,Ca43,Ti49,Zr91,La139,Ce140,Pr141,Nd146,Sm147,Eu153,Gd157,Dy163,Er166,Yb172,Lu175,Hf178,Pb204,Pb206,Pb207,Pb208,Th232,U238	181 - 11.d
/Users/224742i/Desktop/2019-06-11 GA UPb 7700/R33 - 10.csv	2019-06-11 23:14:24.000	2019-06-11 23:16:08.893	2022-02-28 13:38:38.355	200	22	Si29,Ca43,Ti49,Zr91,La139,Ce140,Pr141,Nd146,Sm147,Eu153,Gd157,Dy163,Er166,Yb172,Lu175,Hf178,Pb204,Pb206,Pb207,Pb208,Th232,U238	R33 - 10.d
/Users/224742i/Desktop/2019-06-11 GA UPb 7700/109 - 14.csv	2019-06-11 20:03:47.000	2019-06-11 20:05:31.893	2022-02-28 13:38:38.363	200	22	Si29,Ca43,Ti49,Zr91,La139,Ce140,Pr141,Nd146,Sm147,Eu153,Gd157,Dy163,Er166,Yb172,Lu175,Hf178,Pb204,Pb206,Pb207,Pb208,Th232,U238	109 - 14.d
/Users/224742i/Desktop/2019-06-11 GA UPb 7700/ples - 8.csv	2019-06-12 03:46:59.000	2019-06-12 03:48:43.892	2022-02-28 13:38:38.370	200	22	Si29,Ca43,Ti49,Zr91,La139,Ce140,Pr141,Nd146,Sm147,Eu153,Gd157,Dy163,Er166,Yb172,Lu175,Hf178,Pb204,Pb206,Pb207,Pb208,Th232,U238	ples - 8.d
/Users/224742i/Desktop/2019-06-11 GA UPb 7700/mud - 7.csv	2019-06-11 20:12:21.000	2019-06-11 20:14:05.893	2022-02-28 13:38:38.392	200	22	Si29,Ca43,Ti49,Zr91,La139,Ce140,Pr141,Nd146,Sm147,Eu153,Gd157,Dy163,Er166,Yb172,Lu175,Hf178,Pb204,Pb206,Pb207,Pb208,Th232,U238	mud - 7.d
/Users/224742i/Desktop/2019-06-11 GA UPb 7700/N915 - 29.csv	2019-06-11 16:40:23.000	2019-06-11 16:42:07.893	2022-02-28 13:38:38.400	200	22	Si29,Ca43,Ti49,Zr91,La139,Ce140,Pr141,Nd146,Sm147,Eu153,Gd157,Dy163,Er166,Yb172,Lu175,Hf178,Pb204,Pb206,Pb207,Pb208,Th232,U238	N915 - 29.d
/Users/224742i/Desktop/2019-06-11 GA UPb 7700/111 - 6.csv	2019-06-11 20:51:06.000	2019-06-11 20:52:50.893	2022-02-28 13:38:38.415	200	22	Si29,Ca43,Ti49,Zr91,La139,Ce140,Pr141,Nd146,Sm147,Eu153,Gd157,Dy163,Er166,Yb172,Lu175,Hf178,Pb204,Pb206,Pb207,Pb208,Th232,U238	111 - 6.d
/Users/224742i/Desktop/2019-06-11 GA UPb 7700/N915 - 7.csv	2019-06-11 15:44:48.000	2019-06-11 15:46:32.893	2022-02-28 13:38:38.424	200	22	Si29,Ca43,Ti49,Zr91,La139,Ce140,Pr141,Nd146,Sm147,Eu153,Gd157,Dy163,Er166,Yb172,Lu175,Hf178,Pb204,Pb206,Pb207,Pb208,Th232,U238	N915 - 7.d
/Users/224742i/Desktop/2019-06-11 GA UPb 7700/N915 - 15.csv	2019-06-11 16:01:48.000	2019-06-11 16:03:32.893	2022-02-28 13:38:38.432	200	22	Si29,Ca43,Ti49,Zr91,La139,Ce140,Pr141,Nd146,Sm147,Eu153,Gd157,Dy163,Er166,Yb172,Lu175,Hf178,Pb204,Pb206,Pb207,Pb208,Th232,U238	N915 - 15.d
/Users/224742i/Desktop/2019-06-11 GA UPb 7700/168 - 13.csv	2019-06-12 00:48:58.000	2019-06-12 00:50:42.893	2022-02-28 13:38:38.447	200	22	Si29,Ca43,Ti49,Zr91,La139,Ce140,Pr141,Nd146,Sm147,Eu153,Gd157,Dy163,Er166,Yb172,Lu175,Hf178,Pb204,Pb206,Pb207,Pb208,Th232,U238	168 - 13.d
/Users/224742i/Desktop/2019-06-11 GA UPb 7700/9088 - 16.csv	2019-06-12 05:08:28.000	2019-06-12 05:10:12.893	2022-02-28 13:38:38.455	200	22	Si29,Ca43,Ti49,Zr91,La139,Ce140,Pr141,Nd146,Sm147,Eu153,Gd157,Dy163,Er166,Yb172,Lu175,Hf178,Pb204,Pb206,Pb207,Pb208,Th232,U238	9088 - 16.d
/Users/224742i/Desktop/2019-06-11 GA UPb 7700/009 - 20.csv	2019-06-12 02:38:28.000	2019-06-12 02:40:12.893	2022-02-28 13:38:36.324	200	22	Si29,Ca43,Ti49,Zr91,La139,Ce140,Pr141,Nd146,Sm147,Eu153,Gd157,Dy163,Er166,Yb172,Lu175,Hf178,Pb204,Pb206,Pb207,Pb208,Th232,U238	009 - 20.d
/Users/224742i/Desktop/2019-06-11 GA UPb 7700/91500 - 1.csv	2019-06-11 15:14:35.000	2019-06-11 15:16:19.892	2022-02-28 13:38:36.434	200	22	Si29,Ca43,Ti49,Zr91,La139,Ce140,Pr141,Nd146,Sm147,Eu153,Gd157,Dy163,Er166,Yb172,Lu175,Hf178,Pb204,Pb206,Pb207,Pb208,Th232,U238	91500 - 1.d
/Users/224742i/Desktop/2019-06-11 GA UPb 7700/9088 - 14.csv	2019-06-12 04:55:33.000	2019-06-12 04:57:17.893	2022-02-28 13:38:38.470	200	22	Si29,Ca43,Ti49,Zr91,La139,Ce140,Pr141,Nd146,Sm147,Eu153,Gd157,Dy163,Er166,Yb172,Lu175,Hf178,Pb204,Pb206,Pb207,Pb208,Th232,U238	9088 - 14.d
/Users/224742i/Desktop/2019-06-11 GA UPb 7700/9088 - 28.csv	2019-06-12 05:47:14.000	2019-06-12 05:48:58.892	2022-02-28 13:38:38.519	200	22	Si29,Ca43,Ti49,Zr91,La139,Ce140,Pr141,Nd146,Sm147,Eu153,Gd157,Dy163,Er166,Yb172,Lu175,Hf178,Pb204,Pb206,Pb207,Pb208,Th232,U238	9088 - 28.d
/Users/224742i/Desktop/2019-06-11 GA UPb 7700/N915 - 17.csv	2019-06-11 16:06:03.000	2019-06-11 16:07:47.893	2022-02-28 13:38:38.527	200	22	Si29,Ca43,Ti49,Zr91,La139,Ce140,Pr141,Nd146,Sm147,Eu153,Gd157,Dy163,Er166,Yb172,Lu175,Hf178,Pb204,Pb206,Pb207,Pb208,Th232,U238	N915 - 17.d
/Users/224742i/Desktop/2019-06-11 GA UPb 7700/N915 - 5.csv	2019-06-11 15:40:34.000	2019-06-11 15:42:18.893	2022-02-28 13:38:38.543	200	22	Si29,Ca43,Ti49,Zr91,La139,Ce140,Pr141,Nd146,Sm147,Eu153,Gd157,Dy163,Er166,Yb172,Lu175,Hf178,Pb204,Pb206,Pb207,Pb208,Th232,U238	N915 - 5.d
/Users/224742i/Desktop/2019-06-11 GA UPb 7700/168 - 11.csv	2019-06-12 00:44:43.000	2019-06-12 00:46:27.893	2022-02-28 13:38:38.551	200	22	Si29,Ca43,Ti49,Zr91,La139,Ce140,Pr141,Nd146,Sm147,Eu153,Gd157,Dy163,Er166,Yb172,Lu175,Hf178,Pb204,Pb206,Pb207,Pb208,Th232,U238	168 - 11.d
/Users/224742i/Desktop/2019-06-11 GA UPb 7700/111 - 4.csv	2019-06-11 20:46:52.000	2019-06-11 20:48:36.892	2022-02-28 13:38:38.567	200	22	Si29,Ca43,Ti49,Zr91,La139,Ce140,Pr141,Nd146,Sm147,Eu153,Gd157,Dy163,Er166,Yb172,Lu175,Hf178,Pb204,Pb206,Pb207,Pb208,Th232,U238	111 - 4.d
/Users/224742i/Desktop/2019-06-11 GA UPb 7700/mud - 5.csv	2019-06-11 18:14:39.000	2019-06-11 18:16:23.893	2022-02-28 13:38:38.575	200	22	Si29,Ca43,Ti49,Zr91,La139,Ce140,Pr141,Nd146,Sm147,Eu153,Gd157,Dy163,Er166,Yb172,Lu175,Hf178,Pb204,Pb206,Pb207,Pb208,Th232,U238	mud - 5.d
/Users/224742i/Desktop/2019-06-11 GA UPb 7700/109 - 16.csv	2019-06-11 20:16:42.000	2019-06-11 20:18:26.893	2022-02-28 13:38:38.583	200	22	Si29,Ca43,Ti49,Zr91,La139,Ce140,Pr141,Nd146,Sm147,Eu153,Gd157,Dy163,Er166,Yb172,Lu175,Hf178,Pb204,Pb206,Pb207,Pb208,Th232,U238	109 - 16.d
/Users/224742i/Desktop/2019-06-11 GA UPb 7700/R33 - 12.csv	2019-06-12 01:12:28.000	2019-06-12 01:14:12.893	2022-02-28 13:38:38.599	200	22	Si29,Ca43,Ti49,Zr91,La139,Ce140,Pr141,Nd146,Sm147,Eu153,Gd157,Dy163,Er166,Yb172,Lu175,Hf178,Pb204,Pb206,Pb207,Pb208,Th232,U238	R33 - 12.d
/Users/224742i/Desktop/2019-06-11 GA UPb 7700/9119 - 17.csv	2019-06-12 03:59:59.000	2019-06-12 04:01:43.893	2022-02-28 13:38:38.616	200	22	Si29,Ca43,Ti49,Zr91,La139,Ce140,Pr141,Nd146,Sm147,Eu153,Gd157,Dy163,Er166,Yb172,Lu175,Hf178,Pb204,Pb206,Pb207,Pb208,Th232,U238	9119 - 17.d
/Users/224742i/Desktop/2019-06-11 GA UPb 7700/009 - 6.csv	2019-06-12 01:46:45.000	2019-06-12 01:48:29.891	2022-02-28 13:38:36.438	200	22	Si29,Ca43,Ti49,Zr91,La139,Ce140,Pr141,Nd146,Sm147,Eu153,Gd157,Dy163,Er166,Yb172,Lu175,Hf178,Pb204,Pb206,Pb207,Pb208,Th232,U238	009 - 6.d
/Users/224742i/Desktop/2019-06-11 GA UPb 7700/111 - 19.csv	2019-06-11 21:27:23.000	2019-06-11 21:29:07.893	2022-02-28 13:38:38.632	200	22	Si29,Ca43,Ti49,Zr91,La139,Ce140,Pr141,Nd146,Sm147,Eu153,Gd157,Dy163,Er166,Yb172,Lu175,Hf178,Pb204,Pb206,Pb207,Pb208,Th232,U238	111 - 19.d
/Users/224742i/Desktop/2019-06-11 GA UPb 7700/111 - 25.csv	2019-06-11 21:40:08.000	2019-06-11 21:41:52.893	2022-02-28 13:38:38.640	200	22	Si29,Ca43,Ti49,Zr91,La139,Ce140,Pr141,Nd146,Sm147,Eu153,Gd157,Dy163,Er166,Yb172,Lu175,Hf178,Pb204,Pb206,Pb207,Pb208,Th232,U238	111 - 25.d
/Users/224742i/Desktop/2019-06-11 GA UPb 7700/444 - 25.csv	2019-06-11 23:59:27.000	2019-06-12 00:01:11.893	2022-02-28 13:38:38.648	200	22	Si29,Ca43,Ti49,Zr91,La139,Ce140,Pr141,Nd146,Sm147,Eu153,Gd157,Dy163,Er166,Yb172,Lu175,Hf178,Pb204,Pb206,Pb207,Pb208,Th232,U238	444 - 25.d
/Users/224742i/Desktop/2019-06-11 GA UPb 7700/C915 - 6.csv	2019-06-11 17:08:27.000	2019-06-11 17:10:11.893	2022-02-28 13:38:38.664	200	22	Si29,Ca43,Ti49,Zr91,La139,Ce140,Pr141,Nd146,Sm147,Eu153,Gd157,Dy163,Er166,Yb172,Lu175,Hf178,Pb204,Pb206,Pb207,Pb208,Th232,U238	C915 - 6.d
/Users/224742i/Desktop/2019-06-11 GA UPb 7700/444 - 19.csv	2019-06-11 23:46:42.000	2019-06-11 23:48:26.892	2022-02-28 13:38:38.674	200	22	Si29,Ca43,Ti49,Zr91,La139,Ce140,Pr141,Nd146,Sm147,Eu153,Gd157,Dy163,Er166,Yb172,Lu175,Hf178,Pb204,Pb206,Pb207,Pb208,Th232,U238	444 - 19.d
/Users/224742i/Desktop/2019-06-11 GA UPb 7700/095 - 3.csv	2019-06-11 18:23:18.000	2019-06-11 18:25:02.893	2022-02-28 13:38:38.682	200	22	Si29,Ca43,Ti49,Zr91,La139,Ce140,Pr141,Nd146,Sm147,Eu153,Gd157,Dy163,Er166,Yb172,Lu175,Hf178,Pb204,Pb206,Pb207,Pb208,Th232,U238	095 - 3.d
/Users/224742i/Desktop/2019-06-11 GA UPb 7700/109 - 2.csv	2019-06-11 19:38:18.000	2019-06-11 19:40:02.893	2022-02-28 13:38:38.698	200	22	Si29,Ca43,Ti49,Zr91,La139,Ce140,Pr141,Nd146,Sm147,Eu153,Gd157,Dy163,Er166,Yb172,Lu175,Hf178,Pb204,Pb206,Pb207,Pb208,Th232,U238	109 - 2.d
/Users/224742i/Desktop/2019-06-11 GA UPb 7700/109 - 3.csv	2019-06-11 19:40:24.000	2019-06-11 19:42:08.893	2022-02-28 13:38:38.750	200	22	Si29,Ca43,Ti49,Zr91,La139,Ce140,Pr141,Nd146,Sm147,Eu153,Gd157,Dy163,Er166,Yb172,Lu175,Hf178,Pb204,Pb206,Pb207,Pb208,Th232,U238	109 - 3.d
/Users/224742i/Desktop/2019-06-11 GA UPb 7700/095 - 2.csv	2019-06-11 18:21:12.000	2019-06-11 18:22:56.893	2022-02-28 13:38:38.767	200	22	Si29,Ca43,Ti49,Zr91,La139,Ce140,Pr141,Nd146,Sm147,Eu153,Gd157,Dy163,Er166,Yb172,Lu175,Hf178,Pb204,Pb206,Pb207,Pb208,Th232,U238	095 - 2.d
/Users/224742i/Desktop/2019-06-11 GA UPb 7700/444 - 18.csv	2019-06-11 23:44:32.000	2019-06-11 23:46:16.893	2022-02-28 13:38:38.775	200	22	Si29,Ca43,Ti49,Zr91,La139,Ce140,Pr141,Nd146,Sm147,Eu153,Gd157,Dy163,Er166,Yb172,Lu175,Hf178,Pb204,Pb206,Pb207,Pb208,Th232,U238	444 - 18.d
/Users/224742i/Desktop/2019-06-11 GA UPb 7700/610 - 2.csv	2019-06-11 16:48:52.000	2019-06-11 16:50:36.893	2022-02-28 13:38:36.441	200	22	Si29,Ca43,Ti49,Zr91,La139,Ce140,Pr141,Nd146,Sm147,Eu153,Gd157,Dy163,Er166,Yb172,Lu175,Hf178,Pb204,Pb206,Pb207,Pb208,Th232,U238	610 - 2.d
/Users/224742i/Desktop/2019-06-11 GA UPb 7700/612 - 1.csv	2019-06-11 15:03:42.000	2019-06-11 15:05:26.893	2022-02-28 13:38:38.784	200	22	Si29,Ca43,Ti49,Zr91,La139,Ce140,Pr141,Nd146,Sm147,Eu153,Gd157,Dy163,Er166,Yb172,Lu175,Hf178,Pb204,Pb206,Pb207,Pb208,Th232,U238	612 - 1.d
/Users/224742i/Desktop/2019-06-11 GA UPb 7700/C915 - 7.csv	2019-06-11 17:10:33.000	2019-06-11 17:12:17.893	2022-02-28 13:38:38.801	200	22	Si29,Ca43,Ti49,Zr91,La139,Ce140,Pr141,Nd146,Sm147,Eu153,Gd157,Dy163,Er166,Yb172,Lu175,Hf178,Pb204,Pb206,Pb207,Pb208,Th232,U238	C915 - 7.d
/Users/224742i/Desktop/2019-06-11 GA UPb 7700/444 - 24.csv	2019-06-11 23:57:18.000	2019-06-11 23:59:02.893	2022-02-28 13:38:38.809	200	22	Si29,Ca43,Ti49,Zr91,La139,Ce140,Pr141,Nd146,Sm147,Eu153,Gd157,Dy163,Er166,Yb172,Lu175,Hf178,Pb204,Pb206,Pb207,Pb208,Th232,U238	444 - 24.d
/Users/224742i/Desktop/2019-06-11 GA UPb 7700/111 - 24.csv	2019-06-11 21:38:03.000	2019-06-11 21:39:47.893	2022-02-28 13:38:38.826	200	22	Si29,Ca43,Ti49,Zr91,La139,Ce140,Pr141,Nd146,Sm147,Eu153,Gd157,Dy163,Er166,Yb172,Lu175,Hf178,Pb204,Pb206,Pb207,Pb208,Th232,U238	111 - 24.d
/Users/224742i/Desktop/2019-06-11 GA UPb 7700/111 - 18.csv	2019-06-11 21:25:18.000	2019-06-11 21:27:02.893	2022-02-28 13:38:38.834	200	22	Si29,Ca43,Ti49,Zr91,La139,Ce140,Pr141,Nd146,Sm147,Eu153,Gd157,Dy163,Er166,Yb172,Lu175,Hf178,Pb204,Pb206,Pb207,Pb208,Th232,U238	111 - 18.d
/Users/224742i/Desktop/2019-06-11 GA UPb 7700/9119 - 16.csv	2019-06-12 03:55:38.000	2019-06-12 03:57:22.893	2022-02-28 13:38:38.850	200	22	Si29,Ca43,Ti49,Zr91,La139,Ce140,Pr141,Nd146,Sm147,Eu153,Gd157,Dy163,Er166,Yb172,Lu175,Hf178,Pb204,Pb206,Pb207,Pb208,Th232,U238	9119 - 16.d
/Users/224742i/Desktop/2019-06-11 GA UPb 7700/R33 - 13.csv	2019-06-12 02:17:02.000	2019-06-12 02:18:46.893	2022-02-28 13:38:38.867	200	22	Si29,Ca43,Ti49,Zr91,La139,Ce140,Pr141,Nd146,Sm147,Eu153,Gd157,Dy163,Er166,Yb172,Lu175,Hf178,Pb204,Pb206,Pb207,Pb208,Th232,U238	R33 - 13.d
/Users/224742i/Desktop/2019-06-11 GA UPb 7700/612 - 10.csv	2019-06-12 06:13:10.000	2019-06-12 06:14:54.893	2022-02-28 13:38:38.875	200	22	Si29,Ca43,Ti49,Zr91,La139,Ce140,Pr141,Nd146,Sm147,Eu153,Gd157,Dy163,Er166,Yb172,Lu175,Hf178,Pb204,Pb206,Pb207,Pb208,Th232,U238	612 - 10.d
/Users/224742i/Desktop/2019-06-11 GA UPb 7700/109 - 17.csv	2019-06-11 20:18:50.000	2019-06-11 20:20:34.893	2022-02-28 13:38:38.892	200	22	Si29,Ca43,Ti49,Zr91,La139,Ce140,Pr141,Nd146,Sm147,Eu153,Gd157,Dy163,Er166,Yb172,Lu175,Hf178,Pb204,Pb206,Pb207,Pb208,Th232,U238	109 - 17.d
/Users/224742i/Desktop/2019-06-11 GA UPb 7700/mud - 4.csv	2019-06-11 17:23:22.000	2019-06-11 17:25:06.893	2022-02-28 13:38:38.903	200	22	Si29,Ca43,Ti49,Zr91,La139,Ce140,Pr141,Nd146,Sm147,Eu153,Gd157,Dy163,Er166,Yb172,Lu175,Hf178,Pb204,Pb206,Pb207,Pb208,Th232,U238	mud - 4.d
/Users/224742i/Desktop/2019-06-11 GA UPb 7700/C915 - 18.csv	2019-06-11 17:42:44.000	2019-06-11 17:44:28.893	2022-02-28 13:38:36.444	200	22	Si29,Ca43,Ti49,Zr91,La139,Ce140,Pr141,Nd146,Sm147,Eu153,Gd157,Dy163,Er166,Yb172,Lu175,Hf178,Pb204,Pb206,Pb207,Pb208,Th232,U238	C915 - 18.d
/Users/224742i/Desktop/2019-06-11 GA UPb 7700/111 - 5.csv	2019-06-11 20:48:56.000	2019-06-11 20:50:40.893	2022-02-28 13:38:38.912	200	22	Si29,Ca43,Ti49,Zr91,La139,Ce140,Pr141,Nd146,Sm147,Eu153,Gd157,Dy163,Er166,Yb172,Lu175,Hf178,Pb204,Pb206,Pb207,Pb208,Th232,U238	111 - 5.d
/Users/224742i/Desktop/2019-06-11 GA UPb 7700/168 - 10.csv	2019-06-12 00:42:39.000	2019-06-12 00:44:23.893	2022-02-28 13:38:38.929	200	22	Si29,Ca43,Ti49,Zr91,La139,Ce140,Pr141,Nd146,Sm147,Eu153,Gd157,Dy163,Er166,Yb172,Lu175,Hf178,Pb204,Pb206,Pb207,Pb208,Th232,U238	168 - 10.d
/Users/224742i/Desktop/2019-06-11 GA UPb 7700/N915 - 16.csv	2019-06-11 16:03:57.000	2019-06-11 16:05:41.893	2022-02-28 13:38:38.939	200	22	Si29,Ca43,Ti49,Zr91,La139,Ce140,Pr141,Nd146,Sm147,Eu153,Gd157,Dy163,Er166,Yb172,Lu175,Hf178,Pb204,Pb206,Pb207,Pb208,Th232,U238	N915 - 16.d
/Users/224742i/Desktop/2019-06-11 GA UPb 7700/N915 - 4.csv	2019-06-11 15:38:28.000	2019-06-11 15:40:12.892	2022-02-28 13:38:39.007	200	22	Si29,Ca43,Ti49,Zr91,La139,Ce140,Pr141,Nd146,Sm147,Eu153,Gd157,Dy163,Er166,Yb172,Lu175,Hf178,Pb204,Pb206,Pb207,Pb208,Th232,U238	N915 - 4.d
/Users/224742i/Desktop/2019-06-11 GA UPb 7700/9088 - 29.csv	2019-06-12 05:49:19.000	2019-06-12 05:51:03.893	2022-02-28 13:38:39.019	200	22	Si29,Ca43,Ti49,Zr91,La139,Ce140,Pr141,Nd146,Sm147,Eu153,Gd157,Dy163,Er166,Yb172,Lu175,Hf178,Pb204,Pb206,Pb207,Pb208,Th232,U238	9088 - 29.d
/Users/224742i/Desktop/2019-06-11 GA UPb 7700/9088 - 15.csv	2019-06-12 04:57:38.000	2019-06-12 04:59:22.893	2022-02-28 13:38:39.034	200	22	Si29,Ca43,Ti49,Zr91,La139,Ce140,Pr141,Nd146,Sm147,Eu153,Gd157,Dy163,Er166,Yb172,Lu175,Hf178,Pb204,Pb206,Pb207,Pb208,Th232,U238	9088 - 15.d
/Users/224742i/Desktop/2019-06-11 GA UPb 7700/9088 - 18.csv	2019-06-12 05:12:49.000	2019-06-12 05:14:33.893	2022-02-28 13:38:39.050	200	22	Si29,Ca43,Ti49,Zr91,La139,Ce140,Pr141,Nd146,Sm147,Eu153,Gd157,Dy163,Er166,Yb172,Lu175,Hf178,Pb204,Pb206,Pb207,Pb208,Th232,U238	9088 - 18.d
/Users/224742i/Desktop/2019-06-11 GA UPb 7700/9088 - 30.csv	2019-06-12 05:51:29.000	2019-06-12 05:53:13.893	2022-02-28 13:38:39.059	200	22	Si29,Ca43,Ti49,Zr91,La139,Ce140,Pr141,Nd146,Sm147,Eu153,Gd157,Dy163,Er166,Yb172,Lu175,Hf178,Pb204,Pb206,Pb207,Pb208,Th232,U238	9088 - 30.d
/Users/224742i/Desktop/2019-06-11 GA UPb 7700/9088 - 24.csv	2019-06-12 05:38:40.000	2019-06-12 05:40:24.893	2022-02-28 13:38:39.067	200	22	Si29,Ca43,Ti49,Zr91,La139,Ce140,Pr141,Nd146,Sm147,Eu153,Gd157,Dy163,Er166,Yb172,Lu175,Hf178,Pb204,Pb206,Pb207,Pb208,Th232,U238	9088 - 24.d
/Users/224742i/Desktop/2019-06-11 GA UPb 7700/N915 - 9.csv	2019-06-11 15:49:03.000	2019-06-11 15:50:47.893	2022-02-28 13:38:39.085	200	22	Si29,Ca43,Ti49,Zr91,La139,Ce140,Pr141,Nd146,Sm147,Eu153,Gd157,Dy163,Er166,Yb172,Lu175,Hf178,Pb204,Pb206,Pb207,Pb208,Th232,U238	N915 - 9.d
/Users/224742i/Desktop/2019-06-11 GA UPb 7700/C915 - 24.csv	2019-06-11 17:55:29.000	2019-06-11 17:57:13.893	2022-02-28 13:38:36.449	200	22	Si29,Ca43,Ti49,Zr91,La139,Ce140,Pr141,Nd146,Sm147,Eu153,Gd157,Dy163,Er166,Yb172,Lu175,Hf178,Pb204,Pb206,Pb207,Pb208,Th232,U238	C915 - 24.d
/Users/224742i/Desktop/2019-06-11 GA UPb 7700/111 - 8.csv	2019-06-11 20:55:21.000	2019-06-11 20:57:05.893	2022-02-28 13:38:39.102	200	22	Si29,Ca43,Ti49,Zr91,La139,Ce140,Pr141,Nd146,Sm147,Eu153,Gd157,Dy163,Er166,Yb172,Lu175,Hf178,Pb204,Pb206,Pb207,Pb208,Th232,U238	111 - 8.d
/Users/224742i/Desktop/2019-06-11 GA UPb 7700/168 - 21.csv	2019-06-12 01:14:38.000	2019-06-12 01:16:22.893	2022-02-28 13:38:39.119	200	22	Si29,Ca43,Ti49,Zr91,La139,Ce140,Pr141,Nd146,Sm147,Eu153,Gd157,Dy163,Er166,Yb172,Lu175,Hf178,Pb204,Pb206,Pb207,Pb208,Th232,U238	168 - 21.d
/Users/224742i/Desktop/2019-06-11 GA UPb 7700/N915 - 27.csv	2019-06-11 16:36:07.000	2019-06-11 16:37:51.893	2022-02-28 13:38:39.129	200	22	Si29,Ca43,Ti49,Zr91,La139,Ce140,Pr141,Nd146,Sm147,Eu153,Gd157,Dy163,Er166,Yb172,Lu175,Hf178,Pb204,Pb206,Pb207,Pb208,Th232,U238	N915 - 27.d
/Users/224742i/Desktop/2019-06-11 GA UPb 7700/mud - 9.csv	2019-06-11 22:07:57.000	2019-06-11 22:09:41.893	2022-02-28 13:38:39.138	200	22	Si29,Ca43,Ti49,Zr91,La139,Ce140,Pr141,Nd146,Sm147,Eu153,Gd157,Dy163,Er166,Yb172,Lu175,Hf178,Pb204,Pb206,Pb207,Pb208,Th232,U238	mud - 9.d
/Users/224742i/Desktop/2019-06-11 GA UPb 7700/ples - 6.csv	2019-06-12 00:12:30.000	2019-06-12 00:14:14.892	2022-02-28 13:38:39.157	200	22	Si29,Ca43,Ti49,Zr91,La139,Ce140,Pr141,Nd146,Sm147,Eu153,Gd157,Dy163,Er166,Yb172,Lu175,Hf178,Pb204,Pb206,Pb207,Pb208,Th232,U238	ples - 6.d
/Users/224742i/Desktop/2019-06-11 GA UPb 7700/111 - 15.csv	2019-06-11 21:10:10.000	2019-06-11 21:11:54.893	2022-02-28 13:38:39.166	200	22	Si29,Ca43,Ti49,Zr91,La139,Ce140,Pr141,Nd146,Sm147,Eu153,Gd157,Dy163,Er166,Yb172,Lu175,Hf178,Pb204,Pb206,Pb207,Pb208,Th232,U238	111 - 15.d
/Users/224742i/Desktop/2019-06-11 GA UPb 7700/91500 - 12.csv	2019-06-12 01:05:57.000	2019-06-12 01:07:41.893	2022-02-28 13:38:39.184	200	22	Si29,Ca43,Ti49,Zr91,La139,Ce140,Pr141,Nd146,Sm147,Eu153,Gd157,Dy163,Er166,Yb172,Lu175,Hf178,Pb204,Pb206,Pb207,Pb208,Th232,U238	91500 - 12.d
/Users/224742i/Desktop/2019-06-11 GA UPb 7700/gj - 12.csv	2019-06-12 01:08:12.000	2019-06-12 01:09:56.893	2022-02-28 13:38:39.193	200	22	Si29,Ca43,Ti49,Zr91,La139,Ce140,Pr141,Nd146,Sm147,Eu153,Gd157,Dy163,Er166,Yb172,Lu175,Hf178,Pb204,Pb206,Pb207,Pb208,Th232,U238	gj - 12.d
/Users/224742i/Desktop/2019-06-11 GA UPb 7700/444 - 15.csv	2019-06-11 23:35:52.000	2019-06-11 23:37:36.893	2022-02-28 13:38:39.244	200	22	Si29,Ca43,Ti49,Zr91,La139,Ce140,Pr141,Nd146,Sm147,Eu153,Gd157,Dy163,Er166,Yb172,Lu175,Hf178,Pb204,Pb206,Pb207,Pb208,Th232,U238	444 - 15.d
/Users/224742i/Desktop/2019-06-11 GA UPb 7700/444 - 14.csv	2019-06-11 23:33:47.000	2019-06-11 23:35:31.893	2022-02-28 13:38:39.262	200	22	Si29,Ca43,Ti49,Zr91,La139,Ce140,Pr141,Nd146,Sm147,Eu153,Gd157,Dy163,Er166,Yb172,Lu175,Hf178,Pb204,Pb206,Pb207,Pb208,Th232,U238	444 - 14.d
/Users/224742i/Desktop/2019-06-11 GA UPb 7700/C915 - 30.csv	2019-06-11 18:08:14.000	2019-06-11 18:09:58.893	2022-02-28 13:38:36.513	200	22	Si29,Ca43,Ti49,Zr91,La139,Ce140,Pr141,Nd146,Sm147,Eu153,Gd157,Dy163,Er166,Yb172,Lu175,Hf178,Pb204,Pb206,Pb207,Pb208,Th232,U238	C915 - 30.d
/Users/224742i/Desktop/2019-06-11 GA UPb 7700/gj - 13.csv	2019-06-12 02:12:44.000	2019-06-12 02:14:28.893	2022-02-28 13:38:39.271	200	22	Si29,Ca43,Ti49,Zr91,La139,Ce140,Pr141,Nd146,Sm147,Eu153,Gd157,Dy163,Er166,Yb172,Lu175,Hf178,Pb204,Pb206,Pb207,Pb208,Th232,U238	gj - 13.d
/Users/224742i/Desktop/2019-06-11 GA UPb 7700/111 - 14.csv	2019-06-11 21:08:05.000	2019-06-11 21:09:49.893	2022-02-28 13:38:39.289	200	22	Si29,Ca43,Ti49,Zr91,La139,Ce140,Pr141,Nd146,Sm147,Eu153,Gd157,Dy163,Er166,Yb172,Lu175,Hf178,Pb204,Pb206,Pb207,Pb208,Th232,U238	111 - 14.d
/Users/224742i/Desktop/2019-06-11 GA UPb 7700/91500 - 13.csv	2019-06-12 02:10:33.000	2019-06-12 02:12:17.893	2022-02-28 13:38:39.299	200	22	Si29,Ca43,Ti49,Zr91,La139,Ce140,Pr141,Nd146,Sm147,Eu153,Gd157,Dy163,Er166,Yb172,Lu175,Hf178,Pb204,Pb206,Pb207,Pb208,Th232,U238	91500 - 13.d
/Users/224742i/Desktop/2019-06-11 GA UPb 7700/ples - 7.csv	2019-06-12 01:59:48.000	2019-06-12 02:01:32.893	2022-02-28 13:38:39.308	200	22	Si29,Ca43,Ti49,Zr91,La139,Ce140,Pr141,Nd146,Sm147,Eu153,Gd157,Dy163,Er166,Yb172,Lu175,Hf178,Pb204,Pb206,Pb207,Pb208,Th232,U238	ples - 7.d
/Users/224742i/Desktop/2019-06-11 GA UPb 7700/444 - 1.csv	2019-06-11 22:57:19.000	2019-06-11 22:59:03.893	2022-02-28 13:38:39.328	200	22	Si29,Ca43,Ti49,Zr91,La139,Ce140,Pr141,Nd146,Sm147,Eu153,Gd157,Dy163,Er166,Yb172,Lu175,Hf178,Pb204,Pb206,Pb207,Pb208,Th232,U238	444 - 1.d
/Users/224742i/Desktop/2019-06-11 GA UPb 7700/mud - 8.csv	2019-06-11 21:16:39.000	2019-06-11 21:18:23.893	2022-02-28 13:38:39.338	200	22	Si29,Ca43,Ti49,Zr91,La139,Ce140,Pr141,Nd146,Sm147,Eu153,Gd157,Dy163,Er166,Yb172,Lu175,Hf178,Pb204,Pb206,Pb207,Pb208,Th232,U238	mud - 8.d
/Users/224742i/Desktop/2019-06-11 GA UPb 7700/N915 - 26.csv	2019-06-11 16:34:01.000	2019-06-11 16:35:45.893	2022-02-28 13:38:39.355	200	22	Si29,Ca43,Ti49,Zr91,La139,Ce140,Pr141,Nd146,Sm147,Eu153,Gd157,Dy163,Er166,Yb172,Lu175,Hf178,Pb204,Pb206,Pb207,Pb208,Th232,U238	N915 - 26.d
/Users/224742i/Desktop/2019-06-11 GA UPb 7700/111 - 9.csv	2019-06-11 20:57:27.000	2019-06-11 20:59:11.893	2022-02-28 13:38:39.373	200	22	Si29,Ca43,Ti49,Zr91,La139,Ce140,Pr141,Nd146,Sm147,Eu153,Gd157,Dy163,Er166,Yb172,Lu175,Hf178,Pb204,Pb206,Pb207,Pb208,Th232,U238	111 - 9.d
/Users/224742i/Desktop/2019-06-11 GA UPb 7700/168 - 20.csv	2019-06-12 01:03:52.000	2019-06-12 01:05:36.892	2022-02-28 13:38:39.382	200	22	Si29,Ca43,Ti49,Zr91,La139,Ce140,Pr141,Nd146,Sm147,Eu153,Gd157,Dy163,Er166,Yb172,Lu175,Hf178,Pb204,Pb206,Pb207,Pb208,Th232,U238	168 - 20.d
/Users/224742i/Desktop/2019-06-11 GA UPb 7700/N915 - 8.csv	2019-06-11 15:46:58.000	2019-06-11 15:48:42.891	2022-02-28 13:38:39.401	200	22	Si29,Ca43,Ti49,Zr91,La139,Ce140,Pr141,Nd146,Sm147,Eu153,Gd157,Dy163,Er166,Yb172,Lu175,Hf178,Pb204,Pb206,Pb207,Pb208,Th232,U238	N915 - 8.d
/Users/224742i/Desktop/2019-06-11 GA UPb 7700/FC1 - 2.csv	2019-06-11 16:53:10.000	2019-06-11 16:54:54.893	2022-02-28 13:38:36.518	200	22	Si29,Ca43,Ti49,Zr91,La139,Ce140,Pr141,Nd146,Sm147,Eu153,Gd157,Dy163,Er166,Yb172,Lu175,Hf178,Pb204,Pb206,Pb207,Pb208,Th232,U238	FC1 - 2.d
/Users/224742i/Desktop/2019-06-11 GA UPb 7700/9088 - 25.csv	2019-06-12 05:40:48.000	2019-06-12 05:42:32.893	2022-02-28 13:38:39.410	200	22	Si29,Ca43,Ti49,Zr91,La139,Ce140,Pr141,Nd146,Sm147,Eu153,Gd157,Dy163,Er166,Yb172,Lu175,Hf178,Pb204,Pb206,Pb207,Pb208,Th232,U238	9088 - 25.d
/Users/224742i/Desktop/2019-06-11 GA UPb 7700/9088 - 19.csv	2019-06-12 05:14:54.000	2019-06-12 05:16:38.893	2022-02-28 13:38:39.419	200	22	Si29,Ca43,Ti49,Zr91,La139,Ce140,Pr141,Nd146,Sm147,Eu153,Gd157,Dy163,Er166,Yb172,Lu175,Hf178,Pb204,Pb206,Pb207,Pb208,Th232,U238	9088 - 19.d
/Users/224742i/Desktop/2019-06-11 GA UPb 7700/9088 - 27.csv	2019-06-12 05:45:04.000	2019-06-12 05:46:48.893	2022-02-28 13:38:39.438	200	22	Si29,Ca43,Ti49,Zr91,La139,Ce140,Pr141,Nd146,Sm147,Eu153,Gd157,Dy163,Er166,Yb172,Lu175,Hf178,Pb204,Pb206,Pb207,Pb208,Th232,U238	9088 - 27.d
/Users/224742i/Desktop/2019-06-11 GA UPb 7700/N915 - 18.csv	2019-06-11 16:08:12.000	2019-06-11 16:09:56.893	2022-02-28 13:38:39.449	200	22	Si29,Ca43,Ti49,Zr91,La139,Ce140,Pr141,Nd146,Sm147,Eu153,Gd157,Dy163,Er166,Yb172,Lu175,Hf178,Pb204,Pb206,Pb207,Pb208,Th232,U238	N915 - 18.d
/Users/224742i/Desktop/2019-06-11 GA UPb 7700/N915 - 24.csv	2019-06-11 16:29:46.000	2019-06-11 16:31:30.893	2022-02-28 13:38:39.510	200	22	Si29,Ca43,Ti49,Zr91,La139,Ce140,Pr141,Nd146,Sm147,Eu153,Gd157,Dy163,Er166,Yb172,Lu175,Hf178,Pb204,Pb206,Pb207,Pb208,Th232,U238	N915 - 24.d
/Users/224742i/Desktop/2019-06-11 GA UPb 7700/168 - 22.csv	2019-06-12 01:16:58.000	2019-06-12 01:18:42.893	2022-02-28 13:38:39.520	200	22	Si29,Ca43,Ti49,Zr91,La139,Ce140,Pr141,Nd146,Sm147,Eu153,Gd157,Dy163,Er166,Yb172,Lu175,Hf178,Pb204,Pb206,Pb207,Pb208,Th232,U238	168 - 22.d
/Users/224742i/Desktop/2019-06-11 GA UPb 7700/N915 - 30.csv	2019-06-11 16:42:32.000	2019-06-11 16:44:16.893	2022-02-28 13:38:39.530	200	22	Si29,Ca43,Ti49,Zr91,La139,Ce140,Pr141,Nd146,Sm147,Eu153,Gd157,Dy163,Er166,Yb172,Lu175,Hf178,Pb204,Pb206,Pb207,Pb208,Th232,U238	N915 - 30.d
/Users/224742i/Desktop/2019-06-11 GA UPb 7700/444 - 3.csv	2019-06-11 23:01:34.000	2019-06-11 23:03:18.893	2022-02-28 13:38:39.549	200	22	Si29,Ca43,Ti49,Zr91,La139,Ce140,Pr141,Nd146,Sm147,Eu153,Gd157,Dy163,Er166,Yb172,Lu175,Hf178,Pb204,Pb206,Pb207,Pb208,Th232,U238	444 - 3.d
/Users/224742i/Desktop/2019-06-11 GA UPb 7700/ples - 5.csv	2019-06-11 22:23:12.000	2019-06-11 22:24:56.893	2022-02-28 13:38:39.558	200	22	Si29,Ca43,Ti49,Zr91,La139,Ce140,Pr141,Nd146,Sm147,Eu153,Gd157,Dy163,Er166,Yb172,Lu175,Hf178,Pb204,Pb206,Pb207,Pb208,Th232,U238	ples - 5.d
/Users/224742i/Desktop/2019-06-11 GA UPb 7700/109 - 19.csv	2019-06-11 20:23:05.000	2019-06-11 20:24:49.893	2022-02-28 13:38:39.578	200	22	Si29,Ca43,Ti49,Zr91,La139,Ce140,Pr141,Nd146,Sm147,Eu153,Gd157,Dy163,Er166,Yb172,Lu175,Hf178,Pb204,Pb206,Pb207,Pb208,Th232,U238	109 - 19.d
/Users/224742i/Desktop/2019-06-11 GA UPb 7700/009 - 21.csv	2019-06-12 02:40:32.000	2019-06-12 02:42:16.893	2022-02-28 13:38:36.522	200	22	Si29,Ca43,Ti49,Zr91,La139,Ce140,Pr141,Nd146,Sm147,Eu153,Gd157,Dy163,Er166,Yb172,Lu175,Hf178,Pb204,Pb206,Pb207,Pb208,Th232,U238	009 - 21.d
/Users/224742i/Desktop/2019-06-11 GA UPb 7700/9119 - 18.csv	2019-06-12 04:02:11.000	2019-06-12 04:03:55.893	2022-02-28 13:38:39.587	200	22	Si29,Ca43,Ti49,Zr91,La139,Ce140,Pr141,Nd146,Sm147,Eu153,Gd157,Dy163,Er166,Yb172,Lu175,Hf178,Pb204,Pb206,Pb207,Pb208,Th232,U238	9119 - 18.d
/Users/224742i/Desktop/2019-06-11 GA UPb 7700/91500 - 11.csv	2019-06-12 00:14:40.000	2019-06-12 00:16:24.893	2022-02-28 13:38:39.597	200	22	Si29,Ca43,Ti49,Zr91,La139,Ce140,Pr141,Nd146,Sm147,Eu153,Gd157,Dy163,Er166,Yb172,Lu175,Hf178,Pb204,Pb206,Pb207,Pb208,Th232,U238	91500 - 11.d
/Users/224742i/Desktop/2019-06-11 GA UPb 7700/111 - 16.csv	2019-06-11 21:20:59.000	2019-06-11 21:22:43.893	2022-02-28 13:38:39.624	200	22	Si29,Ca43,Ti49,Zr91,La139,Ce140,Pr141,Nd146,Sm147,Eu153,Gd157,Dy163,Er166,Yb172,Lu175,Hf178,Pb204,Pb206,Pb207,Pb208,Th232,U238	111 - 16.d
/Users/224742i/Desktop/2019-06-11 GA UPb 7700/9119 - 24.csv	2019-06-12 04:23:41.000	2019-06-12 04:25:25.893	2022-02-28 13:38:39.633	200	22	Si29,Ca43,Ti49,Zr91,La139,Ce140,Pr141,Nd146,Sm147,Eu153,Gd157,Dy163,Er166,Yb172,Lu175,Hf178,Pb204,Pb206,Pb207,Pb208,Th232,U238	9119 - 24.d
/Users/224742i/Desktop/2019-06-11 GA UPb 7700/C915 - 9.csv	2019-06-11 17:14:48.000	2019-06-11 17:16:32.893	2022-02-28 13:38:39.653	200	22	Si29,Ca43,Ti49,Zr91,La139,Ce140,Pr141,Nd146,Sm147,Eu153,Gd157,Dy163,Er166,Yb172,Lu175,Hf178,Pb204,Pb206,Pb207,Pb208,Th232,U238	C915 - 9.d
/Users/224742i/Desktop/2019-06-11 GA UPb 7700/444 - 16.csv	2019-06-11 23:40:12.000	2019-06-11 23:41:56.893	2022-02-28 13:38:39.663	200	22	Si29,Ca43,Ti49,Zr91,La139,Ce140,Pr141,Nd146,Sm147,Eu153,Gd157,Dy163,Er166,Yb172,Lu175,Hf178,Pb204,Pb206,Pb207,Pb208,Th232,U238	444 - 16.d
/Users/224742i/Desktop/2019-06-11 GA UPb 7700/gj - 11.csv	2019-06-12 00:16:52.000	2019-06-12 00:18:36.893	2022-02-28 13:38:39.675	200	22	Si29,Ca43,Ti49,Zr91,La139,Ce140,Pr141,Nd146,Sm147,Eu153,Gd157,Dy163,Er166,Yb172,Lu175,Hf178,Pb204,Pb206,Pb207,Pb208,Th232,U238	gj - 11.d
/Users/224742i/Desktop/2019-06-11 GA UPb 7700/gj - 10.csv	2019-06-11 23:10:08.000	2019-06-11 23:11:52.893	2022-02-28 13:38:39.696	200	22	Si29,Ca43,Ti49,Zr91,La139,Ce140,Pr141,Nd146,Sm147,Eu153,Gd157,Dy163,Er166,Yb172,Lu175,Hf178,Pb204,Pb206,Pb207,Pb208,Th232,U238	gj - 10.d
/Users/224742i/Desktop/2019-06-11 GA UPb 7700/444 - 17.csv	2019-06-11 23:42:27.000	2019-06-11 23:44:11.893	2022-02-28 13:38:39.708	200	22	Si29,Ca43,Ti49,Zr91,La139,Ce140,Pr141,Nd146,Sm147,Eu153,Gd157,Dy163,Er166,Yb172,Lu175,Hf178,Pb204,Pb206,Pb207,Pb208,Th232,U238	444 - 17.d
/Users/224742i/Desktop/2019-06-11 GA UPb 7700/C915 - 8.csv	2019-06-11 17:12:43.000	2019-06-11 17:14:27.893	2022-02-28 13:38:39.718	200	22	Si29,Ca43,Ti49,Zr91,La139,Ce140,Pr141,Nd146,Sm147,Eu153,Gd157,Dy163,Er166,Yb172,Lu175,Hf178,Pb204,Pb206,Pb207,Pb208,Th232,U238	C915 - 8.d
/Users/224742i/Desktop/2019-06-11 GA UPb 7700/009 - 23.csv	2019-06-12 02:44:47.000	2019-06-12 02:46:31.893	2022-02-28 13:38:36.526	200	22	Si29,Ca43,Ti49,Zr91,La139,Ce140,Pr141,Nd146,Sm147,Eu153,Gd157,Dy163,Er166,Yb172,Lu175,Hf178,Pb204,Pb206,Pb207,Pb208,Th232,U238	009 - 23.d
/Users/224742i/Desktop/2019-06-11 GA UPb 7700/9119 - 25.csv	2019-06-12 04:25:50.000	2019-06-12 04:27:34.892	2022-02-28 13:38:39.782	200	22	Si29,Ca43,Ti49,Zr91,La139,Ce140,Pr141,Nd146,Sm147,Eu153,Gd157,Dy163,Er166,Yb172,Lu175,Hf178,Pb204,Pb206,Pb207,Pb208,Th232,U238	9119 - 25.d
/Users/224742i/Desktop/2019-06-11 GA UPb 7700/91500 - 10.csv	2019-06-11 23:07:59.000	2019-06-11 23:09:43.892	2022-02-28 13:38:39.793	200	22	Si29,Ca43,Ti49,Zr91,La139,Ce140,Pr141,Nd146,Sm147,Eu153,Gd157,Dy163,Er166,Yb172,Lu175,Hf178,Pb204,Pb206,Pb207,Pb208,Th232,U238	91500 - 10.d
/Users/224742i/Desktop/2019-06-11 GA UPb 7700/111 - 17.csv	2019-06-11 21:23:09.000	2019-06-11 21:24:53.893	2022-02-28 13:38:39.813	200	22	Si29,Ca43,Ti49,Zr91,La139,Ce140,Pr141,Nd146,Sm147,Eu153,Gd157,Dy163,Er166,Yb172,Lu175,Hf178,Pb204,Pb206,Pb207,Pb208,Th232,U238	111 - 17.d
/Users/224742i/Desktop/2019-06-11 GA UPb 7700/9119 - 19.csv	2019-06-12 04:04:20.000	2019-06-12 04:06:04.893	2022-02-28 13:38:39.823	200	22	Si29,Ca43,Ti49,Zr91,La139,Ce140,Pr141,Nd146,Sm147,Eu153,Gd157,Dy163,Er166,Yb172,Lu175,Hf178,Pb204,Pb206,Pb207,Pb208,Th232,U238	9119 - 19.d
/Users/224742i/Desktop/2019-06-11 GA UPb 7700/ples - 10.csv	2019-06-12 06:21:51.000	2019-06-12 06:23:35.893	2022-02-28 13:38:39.832	200	22	Si29,Ca43,Ti49,Zr91,La139,Ce140,Pr141,Nd146,Sm147,Eu153,Gd157,Dy163,Er166,Yb172,Lu175,Hf178,Pb204,Pb206,Pb207,Pb208,Th232,U238	ples - 10.d
/Users/224742i/Desktop/2019-06-11 GA UPb 7700/109 - 18.csv	2019-06-11 20:21:01.000	2019-06-11 20:22:45.893	2022-02-28 13:38:39.852	200	22	Si29,Ca43,Ti49,Zr91,La139,Ce140,Pr141,Nd146,Sm147,Eu153,Gd157,Dy163,Er166,Yb172,Lu175,Hf178,Pb204,Pb206,Pb207,Pb208,Th232,U238	109 - 18.d
/Users/224742i/Desktop/2019-06-11 GA UPb 7700/ples - 4.csv	2019-06-11 20:36:07.000	2019-06-11 20:37:51.893	2022-02-28 13:38:39.862	200	22	Si29,Ca43,Ti49,Zr91,La139,Ce140,Pr141,Nd146,Sm147,Eu153,Gd157,Dy163,Er166,Yb172,Lu175,Hf178,Pb204,Pb206,Pb207,Pb208,Th232,U238	ples - 4.d
/Users/224742i/Desktop/2019-06-11 GA UPb 7700/444 - 2.csv	2019-06-11 22:59:29.000	2019-06-11 23:01:13.893	2022-02-28 13:38:39.884	200	22	Si29,Ca43,Ti49,Zr91,La139,Ce140,Pr141,Nd146,Sm147,Eu153,Gd157,Dy163,Er166,Yb172,Lu175,Hf178,Pb204,Pb206,Pb207,Pb208,Th232,U238	444 - 2.d
/Users/224742i/Desktop/2019-06-11 GA UPb 7700/168 - 23.csv	2019-06-12 01:19:03.000	2019-06-12 01:20:47.893	2022-02-28 13:38:39.901	200	22	Si29,Ca43,Ti49,Zr91,La139,Ce140,Pr141,Nd146,Sm147,Eu153,Gd157,Dy163,Er166,Yb172,Lu175,Hf178,Pb204,Pb206,Pb207,Pb208,Th232,U238	168 - 23.d
/Users/224742i/Desktop/2019-06-11 GA UPb 7700/N915 - 25.csv	2019-06-11 16:31:52.000	2019-06-11 16:33:36.893	2022-02-28 13:38:39.913	200	22	Si29,Ca43,Ti49,Zr91,La139,Ce140,Pr141,Nd146,Sm147,Eu153,Gd157,Dy163,Er166,Yb172,Lu175,Hf178,Pb204,Pb206,Pb207,Pb208,Th232,U238	N915 - 25.d
/Users/224742i/Desktop/2019-06-11 GA UPb 7700/C915 - 26.csv	2019-06-11 17:59:44.000	2019-06-11 18:01:28.893	2022-02-28 13:38:36.531	200	22	Si29,Ca43,Ti49,Zr91,La139,Ce140,Pr141,Nd146,Sm147,Eu153,Gd157,Dy163,Er166,Yb172,Lu175,Hf178,Pb204,Pb206,Pb207,Pb208,Th232,U238	C915 - 26.d
/Users/224742i/Desktop/2019-06-11 GA UPb 7700/N915 - 19.csv	2019-06-11 16:10:19.000	2019-06-11 16:12:03.893	2022-02-28 13:38:39.934	200	22	Si29,Ca43,Ti49,Zr91,La139,Ce140,Pr141,Nd146,Sm147,Eu153,Gd157,Dy163,Er166,Yb172,Lu175,Hf178,Pb204,Pb206,Pb207,Pb208,Th232,U238	N915 - 19.d
/Users/224742i/Desktop/2019-06-11 GA UPb 7700/9088 - 26.csv	2019-06-12 05:42:58.000	2019-06-12 05:44:42.893	2022-02-28 13:38:39.944	200	22	Si29,Ca43,Ti49,Zr91,La139,Ce140,Pr141,Nd146,Sm147,Eu153,Gd157,Dy163,Er166,Yb172,Lu175,Hf178,Pb204,Pb206,Pb207,Pb208,Th232,U238	9088 - 26.d
/Users/224742i/Desktop/2019-06-11 GA UPb 7700/9088 - 22.csv	2019-06-12 05:21:18.000	2019-06-12 05:23:02.893	2022-02-28 13:38:39.964	200	22	Si29,Ca43,Ti49,Zr91,La139,Ce140,Pr141,Nd146,Sm147,Eu153,Gd157,Dy163,Er166,Yb172,Lu175,Hf178,Pb204,Pb206,Pb207,Pb208,Th232,U238	9088 - 22.d
/Users/224742i/Desktop/2019-06-11 GA UPb 7700/N915 - 21.csv	2019-06-11 16:23:14.000	2019-06-11 16:24:58.893	2022-02-28 13:38:39.977	200	22	Si29,Ca43,Ti49,Zr91,La139,Ce140,Pr141,Nd146,Sm147,Eu153,Gd157,Dy163,Er166,Yb172,Lu175,Hf178,Pb204,Pb206,Pb207,Pb208,Th232,U238	N915 - 21.d
/Users/224742i/Desktop/2019-06-11 GA UPb 7700/168 - 27.csv	2019-06-12 01:27:33.000	2019-06-12 01:29:17.893	2022-02-28 13:38:39.987	200	22	Si29,Ca43,Ti49,Zr91,La139,Ce140,Pr141,Nd146,Sm147,Eu153,Gd157,Dy163,Er166,Yb172,Lu175,Hf178,Pb204,Pb206,Pb207,Pb208,Th232,U238	168 - 27.d
/Users/224742i/Desktop/2019-06-11 GA UPb 7700/444 - 6.csv	2019-06-11 23:16:39.000	2019-06-11 23:18:23.893	2022-02-28 13:38:40.008	200	22	Si29,Ca43,Ti49,Zr91,La139,Ce140,Pr141,Nd146,Sm147,Eu153,Gd157,Dy163,Er166,Yb172,Lu175,Hf178,Pb204,Pb206,Pb207,Pb208,Th232,U238	444 - 6.d
/Users/224742i/Desktop/2019-06-11 GA UPb 7700/109 - 20.csv	2019-06-11 20:38:21.000	2019-06-11 20:40:05.892	2022-02-28 13:38:40.060	200	22	Si29,Ca43,Ti49,Zr91,La139,Ce140,Pr141,Nd146,Sm147,Eu153,Gd157,Dy163,Er166,Yb172,Lu175,Hf178,Pb204,Pb206,Pb207,Pb208,Th232,U238	109 - 20.d
/Users/224742i/Desktop/2019-06-11 GA UPb 7700/R33 - 18.csv	2019-06-12 06:08:44.000	2019-06-12 06:10:28.893	2022-02-28 13:38:40.080	200	22	Si29,Ca43,Ti49,Zr91,La139,Ce140,Pr141,Nd146,Sm147,Eu153,Gd157,Dy163,Er166,Yb172,Lu175,Hf178,Pb204,Pb206,Pb207,Pb208,Th232,U238	R33 - 18.d
/Users/224742i/Desktop/2019-06-11 GA UPb 7700/9119 - 21.csv	2019-06-12 04:17:14.000	2019-06-12 04:18:58.893	2022-02-28 13:38:40.090	200	22	Si29,Ca43,Ti49,Zr91,La139,Ce140,Pr141,Nd146,Sm147,Eu153,Gd157,Dy163,Er166,Yb172,Lu175,Hf178,Pb204,Pb206,Pb207,Pb208,Th232,U238	9119 - 21.d
/Users/224742i/Desktop/2019-06-11 GA UPb 7700/111 - 13.csv	2019-06-11 21:05:55.000	2019-06-11 21:07:39.893	2022-02-28 13:38:40.103	200	22	Si29,Ca43,Ti49,Zr91,La139,Ce140,Pr141,Nd146,Sm147,Eu153,Gd157,Dy163,Er166,Yb172,Lu175,Hf178,Pb204,Pb206,Pb207,Pb208,Th232,U238	111 - 13.d
/Users/224742i/Desktop/2019-06-11 GA UPb 7700/C915 - 25.csv	2019-06-11 17:57:34.000	2019-06-11 17:59:18.892	2022-02-28 13:38:36.328	200	22	Si29,Ca43,Ti49,Zr91,La139,Ce140,Pr141,Nd146,Sm147,Eu153,Gd157,Dy163,Er166,Yb172,Lu175,Hf178,Pb204,Pb206,Pb207,Pb208,Th232,U238	C915 - 25.d
/Users/224742i/Desktop/2019-06-11 GA UPb 7700/009 - 4.csv	2019-06-12 01:42:30.000	2019-06-12 01:44:14.893	2022-02-28 13:38:36.535	200	22	Si29,Ca43,Ti49,Zr91,La139,Ce140,Pr141,Nd146,Sm147,Eu153,Gd157,Dy163,Er166,Yb172,Lu175,Hf178,Pb204,Pb206,Pb207,Pb208,Th232,U238	009 - 4.d
/Users/224742i/Desktop/2019-06-11 GA UPb 7700/91500 - 14.csv	2019-06-12 03:01:47.000	2019-06-12 03:03:31.893	2022-02-28 13:38:40.125	200	22	Si29,Ca43,Ti49,Zr91,La139,Ce140,Pr141,Nd146,Sm147,Eu153,Gd157,Dy163,Er166,Yb172,Lu175,Hf178,Pb204,Pb206,Pb207,Pb208,Th232,U238	91500 - 14.d
/Users/224742i/Desktop/2019-06-11 GA UPb 7700/095 - 9.csv	2019-06-11 18:49:06.000	2019-06-11 18:50:50.893	2022-02-28 13:38:40.136	200	22	Si29,Ca43,Ti49,Zr91,La139,Ce140,Pr141,Nd146,Sm147,Eu153,Gd157,Dy163,Er166,Yb172,Lu175,Hf178,Pb204,Pb206,Pb207,Pb208,Th232,U238	095 - 9.d
/Users/224742i/Desktop/2019-06-11 GA UPb 7700/444 - 13.csv	2019-06-11 23:31:37.000	2019-06-11 23:33:21.893	2022-02-28 13:38:40.146	200	22	Si29,Ca43,Ti49,Zr91,La139,Ce140,Pr141,Nd146,Sm147,Eu153,Gd157,Dy163,Er166,Yb172,Lu175,Hf178,Pb204,Pb206,Pb207,Pb208,Th232,U238	444 - 13.d
/Users/224742i/Desktop/2019-06-11 GA UPb 7700/109 - 8.csv	2019-06-11 19:51:02.000	2019-06-11 19:52:46.893	2022-02-28 13:38:40.167	200	22	Si29,Ca43,Ti49,Zr91,La139,Ce140,Pr141,Nd146,Sm147,Eu153,Gd157,Dy163,Er166,Yb172,Lu175,Hf178,Pb204,Pb206,Pb207,Pb208,Th232,U238	109 - 8.d
/Users/224742i/Desktop/2019-06-11 GA UPb 7700/gj - 14.csv	2019-06-12 03:04:00.000	2019-06-12 03:05:44.892	2022-02-28 13:38:40.186	200	22	Si29,Ca43,Ti49,Zr91,La139,Ce140,Pr141,Nd146,Sm147,Eu153,Gd157,Dy163,Er166,Yb172,Lu175,Hf178,Pb204,Pb206,Pb207,Pb208,Th232,U238	gj - 14.d
/Users/224742i/Desktop/2019-06-11 GA UPb 7700/ogc - 10.csv	2019-06-12 06:17:27.000	2019-06-12 06:19:11.893	2022-02-28 13:38:40.208	200	22	Si29,Ca43,Ti49,Zr91,La139,Ce140,Pr141,Nd146,Sm147,Eu153,Gd157,Dy163,Er166,Yb172,Lu175,Hf178,Pb204,Pb206,Pb207,Pb208,Th232,U238	ogc - 10.d
/Users/224742i/Desktop/2019-06-11 GA UPb 7700/gj - 15.csv	2019-06-12 04:10:44.000	2019-06-12 04:12:28.893	2022-02-28 13:38:40.218	200	22	Si29,Ca43,Ti49,Zr91,La139,Ce140,Pr141,Nd146,Sm147,Eu153,Gd157,Dy163,Er166,Yb172,Lu175,Hf178,Pb204,Pb206,Pb207,Pb208,Th232,U238	gj - 15.d
/Users/224742i/Desktop/2019-06-11 GA UPb 7700/109 - 9.csv	2019-06-11 19:53:07.000	2019-06-11 19:54:51.893	2022-02-28 13:38:40.229	200	22	Si29,Ca43,Ti49,Zr91,La139,Ce140,Pr141,Nd146,Sm147,Eu153,Gd157,Dy163,Er166,Yb172,Lu175,Hf178,Pb204,Pb206,Pb207,Pb208,Th232,U238	109 - 9.d
/Users/224742i/Desktop/2019-06-11 GA UPb 7700/444 - 12.csv	2019-06-11 23:29:32.000	2019-06-11 23:31:16.893	2022-02-28 13:38:40.251	200	22	Si29,Ca43,Ti49,Zr91,La139,Ce140,Pr141,Nd146,Sm147,Eu153,Gd157,Dy163,Er166,Yb172,Lu175,Hf178,Pb204,Pb206,Pb207,Pb208,Th232,U238	444 - 12.d
/Users/224742i/Desktop/2019-06-11 GA UPb 7700/095 - 8.csv	2019-06-11 18:33:56.000	2019-06-11 18:35:40.893	2022-02-28 13:38:40.262	200	22	Si29,Ca43,Ti49,Zr91,La139,Ce140,Pr141,Nd146,Sm147,Eu153,Gd157,Dy163,Er166,Yb172,Lu175,Hf178,Pb204,Pb206,Pb207,Pb208,Th232,U238	095 - 8.d
/Users/224742i/Desktop/2019-06-11 GA UPb 7700/91500 - 3.csv	2019-06-11 16:14:34.000	2019-06-11 16:16:18.893	2022-02-28 13:38:36.541	200	22	Si29,Ca43,Ti49,Zr91,La139,Ce140,Pr141,Nd146,Sm147,Eu153,Gd157,Dy163,Er166,Yb172,Lu175,Hf178,Pb204,Pb206,Pb207,Pb208,Th232,U238	91500 - 3.d
/Users/224742i/Desktop/2019-06-11 GA UPb 7700/111 - 12.csv	2019-06-11 21:03:50.000	2019-06-11 21:05:34.892	2022-02-28 13:38:40.284	200	22	Si29,Ca43,Ti49,Zr91,La139,Ce140,Pr141,Nd146,Sm147,Eu153,Gd157,Dy163,Er166,Yb172,Lu175,Hf178,Pb204,Pb206,Pb207,Pb208,Th232,U238	111 - 12.d
/Users/224742i/Desktop/2019-06-11 GA UPb 7700/91500 - 15.csv	2019-06-12 04:08:35.000	2019-06-12 04:10:19.893	2022-02-28 13:38:40.294	200	22	Si29,Ca43,Ti49,Zr91,La139,Ce140,Pr141,Nd146,Sm147,Eu153,Gd157,Dy163,Er166,Yb172,Lu175,Hf178,Pb204,Pb206,Pb207,Pb208,Th232,U238	91500 - 15.d
/Users/224742i/Desktop/2019-06-11 GA UPb 7700/9119 - 20.csv	2019-06-12 04:06:24.000	2019-06-12 04:08:08.893	2022-02-28 13:38:40.348	200	22	Si29,Ca43,Ti49,Zr91,La139,Ce140,Pr141,Nd146,Sm147,Eu153,Gd157,Dy163,Er166,Yb172,Lu175,Hf178,Pb204,Pb206,Pb207,Pb208,Th232,U238	9119 - 20.d
/Users/224742i/Desktop/2019-06-11 GA UPb 7700/ples - 1.csv	2019-06-11 15:12:25.000	2019-06-11 15:14:09.893	2022-02-28 13:38:40.371	200	22	Si29,Ca43,Ti49,Zr91,La139,Ce140,Pr141,Nd146,Sm147,Eu153,Gd157,Dy163,Er166,Yb172,Lu175,Hf178,Pb204,Pb206,Pb207,Pb208,Th232,U238	ples - 1.d
/Users/224742i/Desktop/2019-06-11 GA UPb 7700/444 - 7.csv	2019-06-11 23:18:53.000	2019-06-11 23:20:37.893	2022-02-28 13:38:40.382	200	22	Si29,Ca43,Ti49,Zr91,La139,Ce140,Pr141,Nd146,Sm147,Eu153,Gd157,Dy163,Er166,Yb172,Lu175,Hf178,Pb204,Pb206,Pb207,Pb208,Th232,U238	444 - 7.d
/Users/224742i/Desktop/2019-06-11 GA UPb 7700/168 - 26.csv	2019-06-12 01:25:28.000	2019-06-12 01:27:12.893	2022-02-28 13:38:40.405	200	22	Si29,Ca43,Ti49,Zr91,La139,Ce140,Pr141,Nd146,Sm147,Eu153,Gd157,Dy163,Er166,Yb172,Lu175,Hf178,Pb204,Pb206,Pb207,Pb208,Th232,U238	168 - 26.d
/Users/224742i/Desktop/2019-06-11 GA UPb 7700/N915 - 20.csv	2019-06-11 16:12:29.000	2019-06-11 16:14:13.893	2022-02-28 13:38:40.417	200	22	Si29,Ca43,Ti49,Zr91,La139,Ce140,Pr141,Nd146,Sm147,Eu153,Gd157,Dy163,Er166,Yb172,Lu175,Hf178,Pb204,Pb206,Pb207,Pb208,Th232,U238	N915 - 20.d
/Users/224742i/Desktop/2019-06-11 GA UPb 7700/9088 - 23.csv	2019-06-12 05:23:23.000	2019-06-12 05:25:07.893	2022-02-28 13:38:40.427	200	22	Si29,Ca43,Ti49,Zr91,La139,Ce140,Pr141,Nd146,Sm147,Eu153,Gd157,Dy163,Er166,Yb172,Lu175,Hf178,Pb204,Pb206,Pb207,Pb208,Th232,U238	9088 - 23.d
/Users/224742i/Desktop/2019-06-11 GA UPb 7700/9088 - 21.csv	2019-06-12 05:19:09.000	2019-06-12 05:20:53.893	2022-02-28 13:38:40.449	200	22	Si29,Ca43,Ti49,Zr91,La139,Ce140,Pr141,Nd146,Sm147,Eu153,Gd157,Dy163,Er166,Yb172,Lu175,Hf178,Pb204,Pb206,Pb207,Pb208,Th232,U238	9088 - 21.d
/Users/224742i/Desktop/2019-06-11 GA UPb 7700/168 - 24.csv	2019-06-12 01:21:13.000	2019-06-12 01:22:57.893	2022-02-28 13:38:40.461	200	22	Si29,Ca43,Ti49,Zr91,La139,Ce140,Pr141,Nd146,Sm147,Eu153,Gd157,Dy163,Er166,Yb172,Lu175,Hf178,Pb204,Pb206,Pb207,Pb208,Th232,U238	168 - 24.d
/Users/224742i/Desktop/2019-06-11 GA UPb 7700/181 - 13.csv	2019-06-11 22:29:47.000	2019-06-11 22:31:31.893	2022-02-28 13:38:36.545	200	22	Si29,Ca43,Ti49,Zr91,La139,Ce140,Pr141,Nd146,Sm147,Eu153,Gd157,Dy163,Er166,Yb172,Lu175,Hf178,Pb204,Pb206,Pb207,Pb208,Th232,U238	181 - 13.d
/Users/224742i/Desktop/2019-06-11 GA UPb 7700/N915 - 22.csv	2019-06-11 16:25:31.000	2019-06-11 16:27:15.893	2022-02-28 13:38:40.480	200	22	Si29,Ca43,Ti49,Zr91,La139,Ce140,Pr141,Nd146,Sm147,Eu153,Gd157,Dy163,Er166,Yb172,Lu175,Hf178,Pb204,Pb206,Pb207,Pb208,Th232,U238	N915 - 22.d
/Users/224742i/Desktop/2019-06-11 GA UPb 7700/168 - 30.csv	2019-06-12 01:33:57.000	2019-06-12 01:35:41.893	2022-02-28 13:38:40.503	200	22	Si29,Ca43,Ti49,Zr91,La139,Ce140,Pr141,Nd146,Sm147,Eu153,Gd157,Dy163,Er166,Yb172,Lu175,Hf178,Pb204,Pb206,Pb207,Pb208,Th232,U238	168 - 30.d
/Users/224742i/Desktop/2019-06-11 GA UPb 7700/168 - 18.csv	2019-06-12 00:59:37.000	2019-06-12 01:01:21.893	2022-02-28 13:38:40.514	200	22	Si29,Ca43,Ti49,Zr91,La139,Ce140,Pr141,Nd146,Sm147,Eu153,Gd157,Dy163,Er166,Yb172,Lu175,Hf178,Pb204,Pb206,Pb207,Pb208,Th232,U238	168 - 18.d
/Users/224742i/Desktop/2019-06-11 GA UPb 7700/444 - 5.csv	2019-06-11 23:05:49.000	2019-06-11 23:07:33.893	2022-02-28 13:38:40.539	200	22	Si29,Ca43,Ti49,Zr91,La139,Ce140,Pr141,Nd146,Sm147,Eu153,Gd157,Dy163,Er166,Yb172,Lu175,Hf178,Pb204,Pb206,Pb207,Pb208,Th232,U238	444 - 5.d
/Users/224742i/Desktop/2019-06-11 GA UPb 7700/ples - 3.csv	2019-06-11 18:46:58.000	2019-06-11 18:48:42.893	2022-02-28 13:38:40.550	200	22	Si29,Ca43,Ti49,Zr91,La139,Ce140,Pr141,Nd146,Sm147,Eu153,Gd157,Dy163,Er166,Yb172,Lu175,Hf178,Pb204,Pb206,Pb207,Pb208,Th232,U238	ples - 3.d
/Users/224742i/Desktop/2019-06-11 GA UPb 7700/9119 - 22.csv	2019-06-12 04:19:26.000	2019-06-12 04:21:10.892	2022-02-28 13:38:40.563	200	22	Si29,Ca43,Ti49,Zr91,La139,Ce140,Pr141,Nd146,Sm147,Eu153,Gd157,Dy163,Er166,Yb172,Lu175,Hf178,Pb204,Pb206,Pb207,Pb208,Th232,U238	9119 - 22.d
/Users/224742i/Desktop/2019-06-11 GA UPb 7700/91500 - 17.csv	2019-06-12 05:53:33.000	2019-06-12 05:55:17.893	2022-02-28 13:38:40.584	200	22	Si29,Ca43,Ti49,Zr91,La139,Ce140,Pr141,Nd146,Sm147,Eu153,Gd157,Dy163,Er166,Yb172,Lu175,Hf178,Pb204,Pb206,Pb207,Pb208,Th232,U238	91500 - 17.d
/Users/224742i/Desktop/2019-06-11 GA UPb 7700/111 - 10.csv	2019-06-11 20:59:36.000	2019-06-11 21:01:20.893	2022-02-28 13:38:40.596	200	22	Si29,Ca43,Ti49,Zr91,La139,Ce140,Pr141,Nd146,Sm147,Eu153,Gd157,Dy163,Er166,Yb172,Lu175,Hf178,Pb204,Pb206,Pb207,Pb208,Th232,U238	111 - 10.d
/Users/224742i/Desktop/2019-06-11 GA UPb 7700/gj - 17.csv	2019-06-12 05:55:47.000	2019-06-12 05:57:31.893	2022-02-28 13:38:40.660	200	22	Si29,Ca43,Ti49,Zr91,La139,Ce140,Pr141,Nd146,Sm147,Eu153,Gd157,Dy163,Er166,Yb172,Lu175,Hf178,Pb204,Pb206,Pb207,Pb208,Th232,U238	gj - 17.d
/Users/224742i/Desktop/2019-06-11 GA UPb 7700/612 - 9.csv	2019-06-12 05:27:43.000	2019-06-12 05:29:27.893	2022-02-28 13:38:40.671	200	22	Si29,Ca43,Ti49,Zr91,La139,Ce140,Pr141,Nd146,Sm147,Eu153,Gd157,Dy163,Er166,Yb172,Lu175,Hf178,Pb204,Pb206,Pb207,Pb208,Th232,U238	612 - 9.d
/Users/224742i/Desktop/2019-06-11 GA UPb 7700/ogc - 1.csv	2019-06-11 15:08:02.000	2019-06-11 15:09:46.893	2022-02-28 13:38:36.595	200	22	Si29,Ca43,Ti49,Zr91,La139,Ce140,Pr141,Nd146,Sm147,Eu153,Gd157,Dy163,Er166,Yb172,Lu175,Hf178,Pb204,Pb206,Pb207,Pb208,Th232,U238	ogc - 1.d
/Users/224742i/Desktop/2019-06-11 GA UPb 7700/444 - 10.csv	2019-06-11 23:25:17.000	2019-06-11 23:27:01.893	2022-02-28 13:38:40.682	200	22	Si29,Ca43,Ti49,Zr91,La139,Ce140,Pr141,Nd146,Sm147,Eu153,Gd157,Dy163,Er166,Yb172,Lu175,Hf178,Pb204,Pb206,Pb207,Pb208,Th232,U238	444 - 10.d
/Users/224742i/Desktop/2019-06-11 GA UPb 7700/612 - 8.csv	2019-06-12 03:38:16.000	2019-06-12 03:40:00.893	2022-02-28 13:38:40.706	200	22	Si29,Ca43,Ti49,Zr91,La139,Ce140,Pr141,Nd146,Sm147,Eu153,Gd157,Dy163,Er166,Yb172,Lu175,Hf178,Pb204,Pb206,Pb207,Pb208,Th232,U238	612 - 8.d
/Users/224742i/Desktop/2019-06-11 GA UPb 7700/444 - 11.csv	2019-06-11 23:27:22.000	2019-06-11 23:29:06.893	2022-02-28 13:38:40.717	200	22	Si29,Ca43,Ti49,Zr91,La139,Ce140,Pr141,Nd146,Sm147,Eu153,Gd157,Dy163,Er166,Yb172,Lu175,Hf178,Pb204,Pb206,Pb207,Pb208,Th232,U238	444 - 11.d
/Users/224742i/Desktop/2019-06-11 GA UPb 7700/gj - 16.csv	2019-06-12 05:01:57.000	2019-06-12 05:03:41.893	2022-02-28 13:38:40.740	200	22	Si29,Ca43,Ti49,Zr91,La139,Ce140,Pr141,Nd146,Sm147,Eu153,Gd157,Dy163,Er166,Yb172,Lu175,Hf178,Pb204,Pb206,Pb207,Pb208,Th232,U238	gj - 16.d
/Users/224742i/Desktop/2019-06-11 GA UPb 7700/91500 - 16.csv	2019-06-12 04:59:48.000	2019-06-12 05:01:32.893	2022-02-28 13:38:40.753	200	22	Si29,Ca43,Ti49,Zr91,La139,Ce140,Pr141,Nd146,Sm147,Eu153,Gd157,Dy163,Er166,Yb172,Lu175,Hf178,Pb204,Pb206,Pb207,Pb208,Th232,U238	91500 - 16.d
/Users/224742i/Desktop/2019-06-11 GA UPb 7700/111 - 11.csv	2019-06-11 21:01:42.000	2019-06-11 21:03:26.893	2022-02-28 13:38:40.764	200	22	Si29,Ca43,Ti49,Zr91,La139,Ce140,Pr141,Nd146,Sm147,Eu153,Gd157,Dy163,Er166,Yb172,Lu175,Hf178,Pb204,Pb206,Pb207,Pb208,Th232,U238	111 - 11.d
/Users/224742i/Desktop/2019-06-11 GA UPb 7700/9119 - 23.csv	2019-06-12 04:21:35.000	2019-06-12 04:23:19.893	2022-02-28 13:38:40.794	200	22	Si29,Ca43,Ti49,Zr91,La139,Ce140,Pr141,Nd146,Sm147,Eu153,Gd157,Dy163,Er166,Yb172,Lu175,Hf178,Pb204,Pb206,Pb207,Pb208,Th232,U238	9119 - 23.d
/Users/224742i/Desktop/2019-06-11 GA UPb 7700/ples - 2.csv	2019-06-11 16:59:47.000	2019-06-11 17:01:31.893	2022-02-28 13:38:40.806	200	22	Si29,Ca43,Ti49,Zr91,La139,Ce140,Pr141,Nd146,Sm147,Eu153,Gd157,Dy163,Er166,Yb172,Lu175,Hf178,Pb204,Pb206,Pb207,Pb208,Th232,U238	ples - 2.d
/Users/224742i/Desktop/2019-06-11 GA UPb 7700/444 - 4.csv	2019-06-11 23:03:44.000	2019-06-11 23:05:28.893	2022-02-28 13:38:40.830	200	22	Si29,Ca43,Ti49,Zr91,La139,Ce140,Pr141,Nd146,Sm147,Eu153,Gd157,Dy163,Er166,Yb172,Lu175,Hf178,Pb204,Pb206,Pb207,Pb208,Th232,U238	444 - 4.d
/Users/224742i/Desktop/2019-06-11 GA UPb 7700/168 - 19.csv	2019-06-12 01:01:42.000	2019-06-12 01:03:26.893	2022-02-28 13:38:40.841	200	22	Si29,Ca43,Ti49,Zr91,La139,Ce140,Pr141,Nd146,Sm147,Eu153,Gd157,Dy163,Er166,Yb172,Lu175,Hf178,Pb204,Pb206,Pb207,Pb208,Th232,U238	168 - 19.d
/Users/224742i/Desktop/2019-06-11 GA UPb 7700/9088 - 2.csv	2019-06-12 04:30:05.000	2019-06-12 04:31:49.893	2022-02-28 13:38:36.600	200	22	Si29,Ca43,Ti49,Zr91,La139,Ce140,Pr141,Nd146,Sm147,Eu153,Gd157,Dy163,Er166,Yb172,Lu175,Hf178,Pb204,Pb206,Pb207,Pb208,Th232,U238	9088 - 2.d
/Users/224742i/Desktop/2019-06-11 GA UPb 7700/N915 - 23.csv	2019-06-11 16:27:37.000	2019-06-11 16:29:21.893	2022-02-28 13:38:40.853	200	22	Si29,Ca43,Ti49,Zr91,La139,Ce140,Pr141,Nd146,Sm147,Eu153,Gd157,Dy163,Er166,Yb172,Lu175,Hf178,Pb204,Pb206,Pb207,Pb208,Th232,U238	N915 - 23.d
/Users/224742i/Desktop/2019-06-11 GA UPb 7700/168 - 25.csv	2019-06-12 01:23:18.000	2019-06-12 01:25:02.893	2022-02-28 13:38:40.877	200	22	Si29,Ca43,Ti49,Zr91,La139,Ce140,Pr141,Nd146,Sm147,Eu153,Gd157,Dy163,Er166,Yb172,Lu175,Hf178,Pb204,Pb206,Pb207,Pb208,Th232,U238	168 - 25.d
/Users/224742i/Desktop/2019-06-11 GA UPb 7700/9088 - 20.csv	2019-06-12 05:17:04.000	2019-06-12 05:18:48.893	2022-02-28 13:38:40.890	200	22	Si29,Ca43,Ti49,Zr91,La139,Ce140,Pr141,Nd146,Sm147,Eu153,Gd157,Dy163,Er166,Yb172,Lu175,Hf178,Pb204,Pb206,Pb207,Pb208,Th232,U238	9088 - 20.d
/Users/224742i/Desktop/2019-06-11 GA UPb 7700/009 - 29.csv	2019-06-12 02:57:32.000	2019-06-12 02:59:16.893	2022-02-28 13:38:40.903	200	22	Si29,Ca43,Ti49,Zr91,La139,Ce140,Pr141,Nd146,Sm147,Eu153,Gd157,Dy163,Er166,Yb172,Lu175,Hf178,Pb204,Pb206,Pb207,Pb208,Th232,U238	009 - 29.d
/Users/224742i/Desktop/2019-06-11 GA UPb 7700/R33 - 6.csv	2019-06-11 19:23:15.000	2019-06-11 19:24:59.893	2022-02-28 13:38:40.969	200	22	Si29,Ca43,Ti49,Zr91,La139,Ce140,Pr141,Nd146,Sm147,Eu153,Gd157,Dy163,Er166,Yb172,Lu175,Hf178,Pb204,Pb206,Pb207,Pb208,Th232,U238	R33 - 6.d
/Users/224742i/Desktop/2019-06-11 GA UPb 7700/009 - 15.csv	2019-06-12 02:27:48.000	2019-06-12 02:29:32.893	2022-02-28 13:38:40.981	200	22	Si29,Ca43,Ti49,Zr91,La139,Ce140,Pr141,Nd146,Sm147,Eu153,Gd157,Dy163,Er166,Yb172,Lu175,Hf178,Pb204,Pb206,Pb207,Pb208,Th232,U238	009 - 15.d
/Users/224742i/Desktop/2019-06-11 GA UPb 7700/C915 - 10.csv	2019-06-11 17:16:58.000	2019-06-11 17:18:42.893	2022-02-28 13:38:41.006	200	22	Si29,Ca43,Ti49,Zr91,La139,Ce140,Pr141,Nd146,Sm147,Eu153,Gd157,Dy163,Er166,Yb172,Lu175,Hf178,Pb204,Pb206,Pb207,Pb208,Th232,U238	C915 - 10.d
/Users/224742i/Desktop/2019-06-11 GA UPb 7700/181 - 19.csv	2019-06-11 22:42:30.000	2019-06-11 22:44:14.893	2022-02-28 13:38:41.018	200	22	Si29,Ca43,Ti49,Zr91,La139,Ce140,Pr141,Nd146,Sm147,Eu153,Gd157,Dy163,Er166,Yb172,Lu175,Hf178,Pb204,Pb206,Pb207,Pb208,Th232,U238	181 - 19.d
/Users/224742i/Desktop/2019-06-11 GA UPb 7700/91500 - 9.csv	2019-06-11 22:03:38.000	2019-06-11 22:05:22.893	2022-02-28 13:38:41.030	200	22	Si29,Ca43,Ti49,Zr91,La139,Ce140,Pr141,Nd146,Sm147,Eu153,Gd157,Dy163,Er166,Yb172,Lu175,Hf178,Pb204,Pb206,Pb207,Pb208,Th232,U238	91500 - 9.d
/Users/224742i/Desktop/2019-06-11 GA UPb 7700/181 - 25.csv	2019-06-11 22:55:14.000	2019-06-11 22:56:58.893	2022-02-28 13:38:41.054	200	22	Si29,Ca43,Ti49,Zr91,La139,Ce140,Pr141,Nd146,Sm147,Eu153,Gd157,Dy163,Er166,Yb172,Lu175,Hf178,Pb204,Pb206,Pb207,Pb208,Th232,U238	181 - 25.d
/Users/224742i/Desktop/2019-06-11 GA UPb 7700/P1n - 2.csv	2019-06-11 16:57:33.000	2019-06-11 16:59:17.893	2022-02-28 13:38:36.604	200	22	Si29,Ca43,Ti49,Zr91,La139,Ce140,Pr141,Nd146,Sm147,Eu153,Gd157,Dy163,Er166,Yb172,Lu175,Hf178,Pb204,Pb206,Pb207,Pb208,Th232,U238	P1n - 2.d
/Users/224742i/Desktop/2019-06-11 GA UPb 7700/9119 - 2.csv	2019-06-12 03:12:42.000	2019-06-12 03:14:26.893	2022-02-28 13:38:41.066	200	22	Si29,Ca43,Ti49,Zr91,La139,Ce140,Pr141,Nd146,Sm147,Eu153,Gd157,Dy163,Er166,Yb172,Lu175,Hf178,Pb204,Pb206,Pb207,Pb208,Th232,U238	9119 - 2.d
/Users/224742i/Desktop/2019-06-11 GA UPb 7700/9088 - 8.csv	2019-06-12 04:42:49.000	2019-06-12 04:44:33.893	2022-02-28 13:38:41.089	200	22	Si29,Ca43,Ti49,Zr91,La139,Ce140,Pr141,Nd146,Sm147,Eu153,Gd157,Dy163,Er166,Yb172,Lu175,Hf178,Pb204,Pb206,Pb207,Pb208,Th232,U238	9088 - 8.d
/Users/224742i/Desktop/2019-06-11 GA UPb 7700/P1n - 8.csv	2019-06-12 03:44:45.000	2019-06-12 03:46:29.893	2022-02-28 13:38:41.107	200	22	Si29,Ca43,Ti49,Zr91,La139,Ce140,Pr141,Nd146,Sm147,Eu153,Gd157,Dy163,Er166,Yb172,Lu175,Hf178,Pb204,Pb206,Pb207,Pb208,Th232,U238	P1n - 8.d
/Users/224742i/Desktop/2019-06-11 GA UPb 7700/mud - 16.csv	2019-06-12 05:04:07.000	2019-06-12 05:05:51.893	2022-02-28 13:38:41.119	200	22	Si29,Ca43,Ti49,Zr91,La139,Ce140,Pr141,Nd146,Sm147,Eu153,Gd157,Dy163,Er166,Yb172,Lu175,Hf178,Pb204,Pb206,Pb207,Pb208,Th232,U238	mud - 16.d
/Users/224742i/Desktop/2019-06-11 GA UPb 7700/P1 - 1.csv	2019-06-11 14:58:35.000	2019-06-11 15:00:19.893	2022-02-28 13:38:41.141	200	22	Si29,Ca43,Ti49,Zr91,La139,Ce140,Pr141,Nd146,Sm147,Eu153,Gd157,Dy163,Er166,Yb172,Lu175,Hf178,Pb204,Pb206,Pb207,Pb208,Th232,U238	P1 - 1.d
/Users/224742i/Desktop/2019-06-11 GA UPb 7700/181 - 7.csv	2019-06-11 21:55:07.000	2019-06-11 21:56:51.893	2022-02-28 13:38:41.155	200	22	Si29,Ca43,Ti49,Zr91,La139,Ce140,Pr141,Nd146,Sm147,Eu153,Gd157,Dy163,Er166,Yb172,Lu175,Hf178,Pb204,Pb206,Pb207,Pb208,Th232,U238	181 - 7.d
/Users/224742i/Desktop/2019-06-11 GA UPb 7700/095 - 20.csv	2019-06-11 19:12:33.000	2019-06-11 19:14:17.893	2022-02-28 13:38:41.180	200	22	Si29,Ca43,Ti49,Zr91,La139,Ce140,Pr141,Nd146,Sm147,Eu153,Gd157,Dy163,Er166,Yb172,Lu175,Hf178,Pb204,Pb206,Pb207,Pb208,Th232,U238	095 - 20.d
/Users/224742i/Desktop/2019-06-11 GA UPb 7700/095 - 21.csv	2019-06-11 19:25:30.000	2019-06-11 19:27:14.893	2022-02-28 13:38:41.192	200	22	Si29,Ca43,Ti49,Zr91,La139,Ce140,Pr141,Nd146,Sm147,Eu153,Gd157,Dy163,Er166,Yb172,Lu175,Hf178,Pb204,Pb206,Pb207,Pb208,Th232,U238	095 - 21.d
/Users/224742i/Desktop/2019-06-11 GA UPb 7700/181 - 6.csv	2019-06-11 21:52:58.000	2019-06-11 21:54:42.893	2022-02-28 13:38:41.204	200	22	Si29,Ca43,Ti49,Zr91,La139,Ce140,Pr141,Nd146,Sm147,Eu153,Gd157,Dy163,Er166,Yb172,Lu175,Hf178,Pb204,Pb206,Pb207,Pb208,Th232,U238	181 - 6.d
/Users/224742i/Desktop/2019-06-11 GA UPb 7700/9088 - 9.csv	2019-06-12 04:44:54.000	2019-06-12 04:46:38.893	2022-02-28 13:38:41.229	200	22	Si29,Ca43,Ti49,Zr91,La139,Ce140,Pr141,Nd146,Sm147,Eu153,Gd157,Dy163,Er166,Yb172,Lu175,Hf178,Pb204,Pb206,Pb207,Pb208,Th232,U238	9088 - 9.d
/Users/224742i/Desktop/2019-06-11 GA UPb 7700/9119 - 8.csv	2019-06-12 03:25:27.000	2019-06-12 03:27:11.893	2022-02-28 13:38:36.609	200	22	Si29,Ca43,Ti49,Zr91,La139,Ce140,Pr141,Nd146,Sm147,Eu153,Gd157,Dy163,Er166,Yb172,Lu175,Hf178,Pb204,Pb206,Pb207,Pb208,Th232,U238	9119 - 8.d
/Users/224742i/Desktop/2019-06-11 GA UPb 7700/mud - 17.csv	2019-06-12 05:57:53.000	2019-06-12 05:59:37.892	2022-02-28 13:38:41.283	200	22	Si29,Ca43,Ti49,Zr91,La139,Ce140,Pr141,Nd146,Sm147,Eu153,Gd157,Dy163,Er166,Yb172,Lu175,Hf178,Pb204,Pb206,Pb207,Pb208,Th232,U238	mud - 17.d
/Users/224742i/Desktop/2019-06-11 GA UPb 7700/P1n - 9.csv	2019-06-12 05:34:16.000	2019-06-12 05:36:00.893	2022-02-28 13:38:41.306	200	22	Si29,Ca43,Ti49,Zr91,La139,Ce140,Pr141,Nd146,Sm147,Eu153,Gd157,Dy163,Er166,Yb172,Lu175,Hf178,Pb204,Pb206,Pb207,Pb208,Th232,U238	P1n - 9.d
/Users/224742i/Desktop/2019-06-11 GA UPb 7700/9119 - 3.csv	2019-06-12 03:14:48.000	2019-06-12 03:16:32.893	2022-02-28 13:38:41.318	200	22	Si29,Ca43,Ti49,Zr91,La139,Ce140,Pr141,Nd146,Sm147,Eu153,Gd157,Dy163,Er166,Yb172,Lu175,Hf178,Pb204,Pb206,Pb207,Pb208,Th232,U238	9119 - 3.d
/Users/224742i/Desktop/2019-06-11 GA UPb 7700/91500 - 8.csv	2019-06-11 21:12:20.000	2019-06-11 21:14:04.893	2022-02-28 13:38:41.330	200	22	Si29,Ca43,Ti49,Zr91,La139,Ce140,Pr141,Nd146,Sm147,Eu153,Gd157,Dy163,Er166,Yb172,Lu175,Hf178,Pb204,Pb206,Pb207,Pb208,Th232,U238	91500 - 8.d
/Users/224742i/Desktop/2019-06-11 GA UPb 7700/181 - 24.csv	2019-06-11 22:53:05.000	2019-06-11 22:54:49.893	2022-02-28 13:38:41.355	200	22	Si29,Ca43,Ti49,Zr91,La139,Ce140,Pr141,Nd146,Sm147,Eu153,Gd157,Dy163,Er166,Yb172,Lu175,Hf178,Pb204,Pb206,Pb207,Pb208,Th232,U238	181 - 24.d
/Users/224742i/Desktop/2019-06-11 GA UPb 7700/610 - 10.csv	2019-06-12 06:10:53.000	2019-06-12 06:12:37.893	2022-02-28 13:38:41.366	200	22	Si29,Ca43,Ti49,Zr91,La139,Ce140,Pr141,Nd146,Sm147,Eu153,Gd157,Dy163,Er166,Yb172,Lu175,Hf178,Pb204,Pb206,Pb207,Pb208,Th232,U238	610 - 10.d
/Users/224742i/Desktop/2019-06-11 GA UPb 7700/181 - 18.csv	2019-06-11 22:40:20.000	2019-06-11 22:42:04.893	2022-02-28 13:38:41.380	200	22	Si29,Ca43,Ti49,Zr91,La139,Ce140,Pr141,Nd146,Sm147,Eu153,Gd157,Dy163,Er166,Yb172,Lu175,Hf178,Pb204,Pb206,Pb207,Pb208,Th232,U238	181 - 18.d
/Users/224742i/Desktop/2019-06-11 GA UPb 7700/C915 - 11.csv	2019-06-11 17:27:42.000	2019-06-11 17:29:26.893	2022-02-28 13:38:41.405	200	22	Si29,Ca43,Ti49,Zr91,La139,Ce140,Pr141,Nd146,Sm147,Eu153,Gd157,Dy163,Er166,Yb172,Lu175,Hf178,Pb204,Pb206,Pb207,Pb208,Th232,U238	C915 - 11.d
/Users/224742i/Desktop/2019-06-11 GA UPb 7700/009 - 14.csv	2019-06-12 02:25:43.000	2019-06-12 02:27:27.893	2022-02-28 13:38:41.425	200	22	Si29,Ca43,Ti49,Zr91,La139,Ce140,Pr141,Nd146,Sm147,Eu153,Gd157,Dy163,Er166,Yb172,Lu175,Hf178,Pb204,Pb206,Pb207,Pb208,Th232,U238	009 - 14.d
/Users/224742i/Desktop/2019-06-11 GA UPb 7700/009 - 28.csv	2019-06-12 02:55:27.000	2019-06-12 02:57:11.893	2022-02-28 13:38:41.450	200	22	Si29,Ca43,Ti49,Zr91,La139,Ce140,Pr141,Nd146,Sm147,Eu153,Gd157,Dy163,Er166,Yb172,Lu175,Hf178,Pb204,Pb206,Pb207,Pb208,Th232,U238	009 - 28.d
/Users/224742i/Desktop/2019-06-11 GA UPb 7700/gj - 4.csv	2019-06-11 17:21:16.000	2019-06-11 17:23:00.893	2022-02-28 13:38:36.613	200	22	Si29,Ca43,Ti49,Zr91,La139,Ce140,Pr141,Nd146,Sm147,Eu153,Gd157,Dy163,Er166,Yb172,Lu175,Hf178,Pb204,Pb206,Pb207,Pb208,Th232,U238	gj - 4.d
/Users/224742i/Desktop/2019-06-11 GA UPb 7700/R33 - 7.csv	2019-06-11 20:14:28.000	2019-06-11 20:16:12.893	2022-02-28 13:38:41.462	200	22	Si29,Ca43,Ti49,Zr91,La139,Ce140,Pr141,Nd146,Sm147,Eu153,Gd157,Dy163,Er166,Yb172,Lu175,Hf178,Pb204,Pb206,Pb207,Pb208,Th232,U238	R33 - 7.d
/Users/224742i/Desktop/2019-06-11 GA UPb 7700/R33 - 5.csv	2019-06-11 18:16:49.000	2019-06-11 18:18:33.892	2022-02-28 13:38:41.475	200	22	Si29,Ca43,Ti49,Zr91,La139,Ce140,Pr141,Nd146,Sm147,Eu153,Gd157,Dy163,Er166,Yb172,Lu175,Hf178,Pb204,Pb206,Pb207,Pb208,Th232,U238	R33 - 5.d
/Users/224742i/Desktop/2019-06-11 GA UPb 7700/FC1 - 9.csv	2019-06-12 05:29:54.000	2019-06-12 05:31:38.893	2022-02-28 13:38:41.499	200	22	Si29,Ca43,Ti49,Zr91,La139,Ce140,Pr141,Nd146,Sm147,Eu153,Gd157,Dy163,Er166,Yb172,Lu175,Hf178,Pb204,Pb206,Pb207,Pb208,Th232,U238	FC1 - 9.d
/Users/224742i/Desktop/2019-06-11 GA UPb 7700/009 - 16.csv	2019-06-12 02:29:58.000	2019-06-12 02:31:42.893	2022-02-28 13:38:41.512	200	22	Si29,Ca43,Ti49,Zr91,La139,Ce140,Pr141,Nd146,Sm147,Eu153,Gd157,Dy163,Er166,Yb172,Lu175,Hf178,Pb204,Pb206,Pb207,Pb208,Th232,U238	009 - 16.d
/Users/224742i/Desktop/2019-06-11 GA UPb 7700/C915 - 13.csv	2019-06-11 17:32:05.000	2019-06-11 17:33:49.893	2022-02-28 13:38:41.538	200	22	Si29,Ca43,Ti49,Zr91,La139,Ce140,Pr141,Nd146,Sm147,Eu153,Gd157,Dy163,Er166,Yb172,Lu175,Hf178,Pb204,Pb206,Pb207,Pb208,Th232,U238	C915 - 13.d
/Users/224742i/Desktop/2019-06-11 GA UPb 7700/610 - 9.csv	2019-06-12 05:25:33.000	2019-06-12 05:27:17.892	2022-02-28 13:38:41.550	200	22	Si29,Ca43,Ti49,Zr91,La139,Ce140,Pr141,Nd146,Sm147,Eu153,Gd157,Dy163,Er166,Yb172,Lu175,Hf178,Pb204,Pb206,Pb207,Pb208,Th232,U238	610 - 9.d
/Users/224742i/Desktop/2019-06-11 GA UPb 7700/ogc - 8.csv	2019-06-12 03:42:34.000	2019-06-12 03:44:18.893	2022-02-28 13:38:41.606	200	22	Si29,Ca43,Ti49,Zr91,La139,Ce140,Pr141,Nd146,Sm147,Eu153,Gd157,Dy163,Er166,Yb172,Lu175,Hf178,Pb204,Pb206,Pb207,Pb208,Th232,U238	ogc - 8.d
/Users/224742i/Desktop/2019-06-11 GA UPb 7700/9119 - 1.csv	2019-06-12 03:10:27.000	2019-06-12 03:12:11.893	2022-02-28 13:38:41.632	200	22	Si29,Ca43,Ti49,Zr91,La139,Ce140,Pr141,Nd146,Sm147,Eu153,Gd157,Dy163,Er166,Yb172,Lu175,Hf178,Pb204,Pb206,Pb207,Pb208,Th232,U238	9119 - 1.d
/Users/224742i/Desktop/2019-06-11 GA UPb 7700/mud - 15.csv	2019-06-12 04:12:53.000	2019-06-12 04:14:37.893	2022-02-28 13:38:41.643	200	22	Si29,Ca43,Ti49,Zr91,La139,Ce140,Pr141,Nd146,Sm147,Eu153,Gd157,Dy163,Er166,Yb172,Lu175,Hf178,Pb204,Pb206,Pb207,Pb208,Th232,U238	mud - 15.d
/Users/224742i/Desktop/2019-06-11 GA UPb 7700/P1 - 2.csv	2019-06-11 19:18:57.000	2019-06-11 19:20:41.892	2022-02-28 13:38:41.669	200	22	Si29,Ca43,Ti49,Zr91,La139,Ce140,Pr141,Nd146,Sm147,Eu153,Gd157,Dy163,Er166,Yb172,Lu175,Hf178,Pb204,Pb206,Pb207,Pb208,Th232,U238	P1 - 2.d
/Users/224742i/Desktop/2019-06-11 GA UPb 7700/095 - 16.csv	2019-06-11 19:04:03.000	2019-06-11 19:05:47.893	2022-02-28 13:38:36.617	200	22	Si29,Ca43,Ti49,Zr91,La139,Ce140,Pr141,Nd146,Sm147,Eu153,Gd157,Dy163,Er166,Yb172,Lu175,Hf178,Pb204,Pb206,Pb207,Pb208,Th232,U238	095 - 16.d
/Users/224742i/Desktop/2019-06-11 GA UPb 7700/095 - 23.csv	2019-06-11 19:29:49.000	2019-06-11 19:31:33.893	2022-02-28 13:38:41.684	200	22	Si29,Ca43,Ti49,Zr91,La139,Ce140,Pr141,Nd146,Sm147,Eu153,Gd157,Dy163,Er166,Yb172,Lu175,Hf178,Pb204,Pb206,Pb207,Pb208,Th232,U238	095 - 23.d
/Users/224742i/Desktop/2019-06-11 GA UPb 7700/181 - 4.csv	2019-06-11 21:48:43.000	2019-06-11 21:50:27.893	2022-02-28 13:38:41.697	200	22	Si29,Ca43,Ti49,Zr91,La139,Ce140,Pr141,Nd146,Sm147,Eu153,Gd157,Dy163,Er166,Yb172,Lu175,Hf178,Pb204,Pb206,Pb207,Pb208,Th232,U238	181 - 4.d
/Users/224742i/Desktop/2019-06-11 GA UPb 7700/181 - 5.csv	2019-06-11 21:50:52.000	2019-06-11 21:52:36.893	2022-02-28 13:38:41.725	200	22	Si29,Ca43,Ti49,Zr91,La139,Ce140,Pr141,Nd146,Sm147,Eu153,Gd157,Dy163,Er166,Yb172,Lu175,Hf178,Pb204,Pb206,Pb207,Pb208,Th232,U238	181 - 5.d
/Users/224742i/Desktop/2019-06-11 GA UPb 7700/095 - 22.csv	2019-06-11 19:27:39.000	2019-06-11 19:29:23.893	2022-02-28 13:38:41.738	200	22	Si29,Ca43,Ti49,Zr91,La139,Ce140,Pr141,Nd146,Sm147,Eu153,Gd157,Dy163,Er166,Yb172,Lu175,Hf178,Pb204,Pb206,Pb207,Pb208,Th232,U238	095 - 22.d
/Users/224742i/Desktop/2019-06-11 GA UPb 7700/P1 - 3.csv	2019-06-11 23:38:02.000	2019-06-11 23:39:46.893	2022-02-28 13:38:41.758	200	22	Si29,Ca43,Ti49,Zr91,La139,Ce140,Pr141,Nd146,Sm147,Eu153,Gd157,Dy163,Er166,Yb172,Lu175,Hf178,Pb204,Pb206,Pb207,Pb208,Th232,U238	P1 - 3.d
/Users/224742i/Desktop/2019-06-11 GA UPb 7700/mud - 14.csv	2019-06-12 03:06:06.000	2019-06-12 03:07:50.893	2022-02-28 13:38:41.785	200	22	Si29,Ca43,Ti49,Zr91,La139,Ce140,Pr141,Nd146,Sm147,Eu153,Gd157,Dy163,Er166,Yb172,Lu175,Hf178,Pb204,Pb206,Pb207,Pb208,Th232,U238	mud - 14.d
/Users/224742i/Desktop/2019-06-11 GA UPb 7700/ogc - 9.csv	2019-06-12 05:32:01.000	2019-06-12 05:33:45.893	2022-02-28 13:38:41.797	200	22	Si29,Ca43,Ti49,Zr91,La139,Ce140,Pr141,Nd146,Sm147,Eu153,Gd157,Dy163,Er166,Yb172,Lu175,Hf178,Pb204,Pb206,Pb207,Pb208,Th232,U238	ogc - 9.d
/Users/224742i/Desktop/2019-06-11 GA UPb 7700/610 - 8.csv	2019-06-12 03:36:02.000	2019-06-12 03:37:46.893	2022-02-28 13:38:41.824	200	22	Si29,Ca43,Ti49,Zr91,La139,Ce140,Pr141,Nd146,Sm147,Eu153,Gd157,Dy163,Er166,Yb172,Lu175,Hf178,Pb204,Pb206,Pb207,Pb208,Th232,U238	610 - 8.d
/Users/224742i/Desktop/2019-06-11 GA UPb 7700/C915 - 12.csv	2019-06-11 17:30:00.000	2019-06-11 17:31:44.893	2022-02-28 13:38:41.837	200	22	Si29,Ca43,Ti49,Zr91,La139,Ce140,Pr141,Nd146,Sm147,Eu153,Gd157,Dy163,Er166,Yb172,Lu175,Hf178,Pb204,Pb206,Pb207,Pb208,Th232,U238	C915 - 12.d
/Users/224742i/Desktop/2019-06-11 GA UPb 7700/009 - 17.csv	2019-06-12 02:32:03.000	2019-06-12 02:33:47.893	2022-02-28 13:38:41.850	200	22	Si29,Ca43,Ti49,Zr91,La139,Ce140,Pr141,Nd146,Sm147,Eu153,Gd157,Dy163,Er166,Yb172,Lu175,Hf178,Pb204,Pb206,Pb207,Pb208,Th232,U238	009 - 17.d
/Users/224742i/Desktop/2019-06-11 GA UPb 7700/168 - 7.csv	2019-06-12 00:36:14.000	2019-06-12 00:37:58.893	2022-02-28 13:38:36.622	200	22	Si29,Ca43,Ti49,Zr91,La139,Ce140,Pr141,Nd146,Sm147,Eu153,Gd157,Dy163,Er166,Yb172,Lu175,Hf178,Pb204,Pb206,Pb207,Pb208,Th232,U238	168 - 7.d
/Users/224742i/Desktop/2019-06-11 GA UPb 7700/FC1 - 8.csv	2019-06-12 03:40:22.000	2019-06-12 03:42:06.893	2022-02-28 13:38:41.877	200	22	Si29,Ca43,Ti49,Zr91,La139,Ce140,Pr141,Nd146,Sm147,Eu153,Gd157,Dy163,Er166,Yb172,Lu175,Hf178,Pb204,Pb206,Pb207,Pb208,Th232,U238	FC1 - 8.d
/Users/224742i/Desktop/2019-06-11 GA UPb 7700/R33 - 4.csv	2019-06-11 17:25:32.000	2019-06-11 17:27:16.893	2022-02-28 13:38:41.890	200	22	Si29,Ca43,Ti49,Zr91,La139,Ce140,Pr141,Nd146,Sm147,Eu153,Gd157,Dy163,Er166,Yb172,Lu175,Hf178,Pb204,Pb206,Pb207,Pb208,Th232,U238	R33 - 4.d
/Users/224742i/Desktop/2019-06-11 GA UPb 7700/009 - 13.csv	2019-06-12 02:23:34.000	2019-06-12 02:25:18.893	2022-02-28 13:38:41.958	200	22	Si29,Ca43,Ti49,Zr91,La139,Ce140,Pr141,Nd146,Sm147,Eu153,Gd157,Dy163,Er166,Yb172,Lu175,Hf178,Pb204,Pb206,Pb207,Pb208,Th232,U238	009 - 13.d
/Users/224742i/Desktop/2019-06-11 GA UPb 7700/C915 - 16.csv	2019-06-11 17:38:30.000	2019-06-11 17:40:14.892	2022-02-28 13:38:41.972	200	22	Si29,Ca43,Ti49,Zr91,La139,Ce140,Pr141,Nd146,Sm147,Eu153,Gd157,Dy163,Er166,Yb172,Lu175,Hf178,Pb204,Pb206,Pb207,Pb208,Th232,U238	C915 - 16.d
/Users/224742i/Desktop/2019-06-11 GA UPb 7700/009 - 8.csv	2019-06-12 02:04:13.000	2019-06-12 02:05:57.893	2022-02-28 13:38:41.984	200	22	Si29,Ca43,Ti49,Zr91,La139,Ce140,Pr141,Nd146,Sm147,Eu153,Gd157,Dy163,Er166,Yb172,Lu175,Hf178,Pb204,Pb206,Pb207,Pb208,Th232,U238	009 - 8.d
/Users/224742i/Desktop/2019-06-11 GA UPb 7700/181 - 23.csv	2019-06-11 22:50:59.000	2019-06-11 22:52:43.893	2022-02-28 13:38:42.011	200	22	Si29,Ca43,Ti49,Zr91,La139,Ce140,Pr141,Nd146,Sm147,Eu153,Gd157,Dy163,Er166,Yb172,Lu175,Hf178,Pb204,Pb206,Pb207,Pb208,Th232,U238	181 - 23.d
/Users/224742i/Desktop/2019-06-11 GA UPb 7700/mud - 10.csv	2019-06-11 23:12:18.000	2019-06-11 23:14:02.893	2022-02-28 13:38:42.024	200	22	Si29,Ca43,Ti49,Zr91,La139,Ce140,Pr141,Nd146,Sm147,Eu153,Gd157,Dy163,Er166,Yb172,Lu175,Hf178,Pb204,Pb206,Pb207,Pb208,Th232,U238	mud - 10.d
/Users/224742i/Desktop/2019-06-11 GA UPb 7700/FC1 - 10.csv	2019-06-12 06:15:15.000	2019-06-12 06:16:59.892	2022-02-28 13:38:42.051	200	22	Si29,Ca43,Ti49,Zr91,La139,Ce140,Pr141,Nd146,Sm147,Eu153,Gd157,Dy163,Er166,Yb172,Lu175,Hf178,Pb204,Pb206,Pb207,Pb208,Th232,U238	FC1 - 10.d
/Users/224742i/Desktop/2019-06-11 GA UPb 7700/9119 - 4.csv	2019-06-12 03:16:57.000	2019-06-12 03:18:41.893	2022-02-28 13:38:42.063	200	22	Si29,Ca43,Ti49,Zr91,La139,Ce140,Pr141,Nd146,Sm147,Eu153,Gd157,Dy163,Er166,Yb172,Lu175,Hf178,Pb204,Pb206,Pb207,Pb208,Th232,U238	9119 - 4.d
/Users/224742i/Desktop/2019-06-11 GA UPb 7700/181 - 1.csv	2019-06-11 21:42:18.000	2019-06-11 21:44:02.893	2022-02-28 13:38:42.076	200	22	Si29,Ca43,Ti49,Zr91,La139,Ce140,Pr141,Nd146,Sm147,Eu153,Gd157,Dy163,Er166,Yb172,Lu175,Hf178,Pb204,Pb206,Pb207,Pb208,Th232,U238	181 - 1.d
/Users/224742i/Desktop/2019-06-11 GA UPb 7700/C915 - 19.csv	2019-06-11 17:44:50.000	2019-06-11 17:46:34.893	2022-02-28 13:38:36.331	200	22	Si29,Ca43,Ti49,Zr91,La139,Ce140,Pr141,Nd146,Sm147,Eu153,Gd157,Dy163,Er166,Yb172,Lu175,Hf178,Pb204,Pb206,Pb207,Pb208,Th232,U238	C915 - 19.d
/Users/224742i/Desktop/2019-06-11 GA UPb 7700/095 - 17.csv	2019-06-11 19:06:09.000	2019-06-11 19:07:53.893	2022-02-28 13:38:36.625	200	22	Si29,Ca43,Ti49,Zr91,La139,Ce140,Pr141,Nd146,Sm147,Eu153,Gd157,Dy163,Er166,Yb172,Lu175,Hf178,Pb204,Pb206,Pb207,Pb208,Th232,U238	095 - 17.d
/Users/224742i/Desktop/2019-06-11 GA UPb 7700/gj - 8.csv	2019-06-11 21:14:28.000	2019-06-11 21:16:12.893	2022-02-28 13:38:42.110	200	22	Si29,Ca43,Ti49,Zr91,La139,Ce140,Pr141,Nd146,Sm147,Eu153,Gd157,Dy163,Er166,Yb172,Lu175,Hf178,Pb204,Pb206,Pb207,Pb208,Th232,U238	gj - 8.d
/Users/224742i/Desktop/2019-06-11 GA UPb 7700/gj - 9.csv	2019-06-11 22:05:47.000	2019-06-11 22:07:31.893	2022-02-28 13:38:42.123	200	22	Si29,Ca43,Ti49,Zr91,La139,Ce140,Pr141,Nd146,Sm147,Eu153,Gd157,Dy163,Er166,Yb172,Lu175,Hf178,Pb204,Pb206,Pb207,Pb208,Th232,U238	gj - 9.d
/Users/224742i/Desktop/2019-06-11 GA UPb 7700/9119 - 5.csv	2019-06-12 03:19:02.000	2019-06-12 03:20:46.893	2022-02-28 13:38:42.150	200	22	Si29,Ca43,Ti49,Zr91,La139,Ce140,Pr141,Nd146,Sm147,Eu153,Gd157,Dy163,Er166,Yb172,Lu175,Hf178,Pb204,Pb206,Pb207,Pb208,Th232,U238	9119 - 5.d
/Users/224742i/Desktop/2019-06-11 GA UPb 7700/mud - 11.csv	2019-06-12 00:18:58.000	2019-06-12 00:20:42.893	2022-02-28 13:38:42.163	200	22	Si29,Ca43,Ti49,Zr91,La139,Ce140,Pr141,Nd146,Sm147,Eu153,Gd157,Dy163,Er166,Yb172,Lu175,Hf178,Pb204,Pb206,Pb207,Pb208,Th232,U238	mud - 11.d
/Users/224742i/Desktop/2019-06-11 GA UPb 7700/181 - 22.csv	2019-06-11 22:48:50.000	2019-06-11 22:50:34.893	2022-02-28 13:38:42.176	200	22	Si29,Ca43,Ti49,Zr91,La139,Ce140,Pr141,Nd146,Sm147,Eu153,Gd157,Dy163,Er166,Yb172,Lu175,Hf178,Pb204,Pb206,Pb207,Pb208,Th232,U238	181 - 22.d
/Users/224742i/Desktop/2019-06-11 GA UPb 7700/009 - 9.csv	2019-06-12 02:06:18.000	2019-06-12 02:08:02.893	2022-02-28 13:38:42.203	200	22	Si29,Ca43,Ti49,Zr91,La139,Ce140,Pr141,Nd146,Sm147,Eu153,Gd157,Dy163,Er166,Yb172,Lu175,Hf178,Pb204,Pb206,Pb207,Pb208,Th232,U238	009 - 9.d
/Users/224742i/Desktop/2019-06-11 GA UPb 7700/C915 - 17.csv	2019-06-11 17:40:35.000	2019-06-11 17:42:19.893	2022-02-28 13:38:42.216	200	22	Si29,Ca43,Ti49,Zr91,La139,Ce140,Pr141,Nd146,Sm147,Eu153,Gd157,Dy163,Er166,Yb172,Lu175,Hf178,Pb204,Pb206,Pb207,Pb208,Th232,U238	C915 - 17.d
/Users/224742i/Desktop/2019-06-11 GA UPb 7700/R33 - 1.csv	2019-06-11 15:21:04.000	2019-06-11 15:22:48.893	2022-02-28 13:38:42.231	200	22	Si29,Ca43,Ti49,Zr91,La139,Ce140,Pr141,Nd146,Sm147,Eu153,Gd157,Dy163,Er166,Yb172,Lu175,Hf178,Pb204,Pb206,Pb207,Pb208,Th232,U238	R33 - 1.d
/Users/224742i/Desktop/2019-06-11 GA UPb 7700/009 - 12.csv	2019-06-12 02:21:29.000	2019-06-12 02:23:13.893	2022-02-28 13:38:42.301	200	22	Si29,Ca43,Ti49,Zr91,La139,Ce140,Pr141,Nd146,Sm147,Eu153,Gd157,Dy163,Er166,Yb172,Lu175,Hf178,Pb204,Pb206,Pb207,Pb208,Th232,U238	009 - 12.d
/Users/224742i/Desktop/2019-06-11 GA UPb 7700/009 - 10.csv	2019-06-12 02:08:27.000	2019-06-12 02:10:11.893	2022-02-28 13:38:42.315	200	22	Si29,Ca43,Ti49,Zr91,La139,Ce140,Pr141,Nd146,Sm147,Eu153,Gd157,Dy163,Er166,Yb172,Lu175,Hf178,Pb204,Pb206,Pb207,Pb208,Th232,U238	009 - 10.d
/Users/224742i/Desktop/2019-06-11 GA UPb 7700/168 - 6.csv	2019-06-12 00:34:10.000	2019-06-12 00:35:54.893	2022-02-28 13:38:36.668	200	22	Si29,Ca43,Ti49,Zr91,La139,Ce140,Pr141,Nd146,Sm147,Eu153,Gd157,Dy163,Er166,Yb172,Lu175,Hf178,Pb204,Pb206,Pb207,Pb208,Th232,U238	168 - 6.d
/Users/224742i/Desktop/2019-06-11 GA UPb 7700/R33 - 3.csv	2019-06-11 16:21:04.000	2019-06-11 16:22:48.893	2022-02-28 13:38:42.343	200	22	Si29,Ca43,Ti49,Zr91,La139,Ce140,Pr141,Nd146,Sm147,Eu153,Gd157,Dy163,Er166,Yb172,Lu175,Hf178,Pb204,Pb206,Pb207,Pb208,Th232,U238	R33 - 3.d
/Users/224742i/Desktop/2019-06-11 GA UPb 7700/C915 - 29.csv	2019-06-11 18:06:04.000	2019-06-11 18:07:48.893	2022-02-28 13:38:42.356	200	22	Si29,Ca43,Ti49,Zr91,La139,Ce140,Pr141,Nd146,Sm147,Eu153,Gd157,Dy163,Er166,Yb172,Lu175,Hf178,Pb204,Pb206,Pb207,Pb208,Th232,U238	C915 - 29.d
/Users/224742i/Desktop/2019-06-11 GA UPb 7700/C915 - 15.csv	2019-06-11 17:36:20.000	2019-06-11 17:38:04.893	2022-02-28 13:38:42.370	200	22	Si29,Ca43,Ti49,Zr91,La139,Ce140,Pr141,Nd146,Sm147,Eu153,Gd157,Dy163,Er166,Yb172,Lu175,Hf178,Pb204,Pb206,Pb207,Pb208,Th232,U238	C915 - 15.d
/Users/224742i/Desktop/2019-06-11 GA UPb 7700/181 - 20.csv	2019-06-11 22:44:35.000	2019-06-11 22:46:19.893	2022-02-28 13:38:42.398	200	22	Si29,Ca43,Ti49,Zr91,La139,Ce140,Pr141,Nd146,Sm147,Eu153,Gd157,Dy163,Er166,Yb172,Lu175,Hf178,Pb204,Pb206,Pb207,Pb208,Th232,U238	181 - 20.d
/Users/224742i/Desktop/2019-06-11 GA UPb 7700/mud - 13.csv	2019-06-12 02:14:50.000	2019-06-12 02:16:34.893	2022-02-28 13:38:42.411	200	22	Si29,Ca43,Ti49,Zr91,La139,Ce140,Pr141,Nd146,Sm147,Eu153,Gd157,Dy163,Er166,Yb172,Lu175,Hf178,Pb204,Pb206,Pb207,Pb208,Th232,U238	mud - 13.d
/Users/224742i/Desktop/2019-06-11 GA UPb 7700/9119 - 7.csv	2019-06-12 03:23:17.000	2019-06-12 03:25:01.892	2022-02-28 13:38:42.438	200	22	Si29,Ca43,Ti49,Zr91,La139,Ce140,Pr141,Nd146,Sm147,Eu153,Gd157,Dy163,Er166,Yb172,Lu175,Hf178,Pb204,Pb206,Pb207,Pb208,Th232,U238	9119 - 7.d
/Users/224742i/Desktop/2019-06-11 GA UPb 7700/181 - 2.csv	2019-06-11 21:44:28.000	2019-06-11 21:46:12.892	2022-02-28 13:38:42.459	200	22	Si29,Ca43,Ti49,Zr91,La139,Ce140,Pr141,Nd146,Sm147,Eu153,Gd157,Dy163,Er166,Yb172,Lu175,Hf178,Pb204,Pb206,Pb207,Pb208,Th232,U238	181 - 2.d
/Users/224742i/Desktop/2019-06-11 GA UPb 7700/095 - 25.csv	2019-06-11 19:34:02.000	2019-06-11 19:35:46.893	2022-02-28 13:38:42.473	200	22	Si29,Ca43,Ti49,Zr91,La139,Ce140,Pr141,Nd146,Sm147,Eu153,Gd157,Dy163,Er166,Yb172,Lu175,Hf178,Pb204,Pb206,Pb207,Pb208,Th232,U238	095 - 25.d
/Users/224742i/Desktop/2019-06-11 GA UPb 7700/P1 - 4.csv	2019-06-12 03:57:44.000	2019-06-12 03:59:28.893	2022-02-28 13:38:42.500	200	22	Si29,Ca43,Ti49,Zr91,La139,Ce140,Pr141,Nd146,Sm147,Eu153,Gd157,Dy163,Er166,Yb172,Lu175,Hf178,Pb204,Pb206,Pb207,Pb208,Th232,U238	P1 - 4.d
/Users/224742i/Desktop/2019-06-11 GA UPb 7700/168 - 8.csv	2019-06-12 00:38:23.000	2019-06-12 00:40:07.893	2022-02-28 13:38:42.514	200	22	Si29,Ca43,Ti49,Zr91,La139,Ce140,Pr141,Nd146,Sm147,Eu153,Gd157,Dy163,Er166,Yb172,Lu175,Hf178,Pb204,Pb206,Pb207,Pb208,Th232,U238	168 - 8.d
/Users/224742i/Desktop/2019-06-11 GA UPb 7700/gj - 5.csv	2019-06-11 18:12:33.000	2019-06-11 18:14:17.893	2022-02-28 13:38:36.672	200	22	Si29,Ca43,Ti49,Zr91,La139,Ce140,Pr141,Nd146,Sm147,Eu153,Gd157,Dy163,Er166,Yb172,Lu175,Hf178,Pb204,Pb206,Pb207,Pb208,Th232,U238	gj - 5.d
/Users/224742i/Desktop/2019-06-11 GA UPb 7700/095 - 19.csv	2019-06-11 19:10:23.000	2019-06-11 19:12:07.893	2022-02-28 13:38:42.544	200	22	Si29,Ca43,Ti49,Zr91,La139,Ce140,Pr141,Nd146,Sm147,Eu153,Gd157,Dy163,Er166,Yb172,Lu175,Hf178,Pb204,Pb206,Pb207,Pb208,Th232,U238	095 - 19.d
/Users/224742i/Desktop/2019-06-11 GA UPb 7700/168 - 9.csv	2019-06-12 00:40:28.000	2019-06-12 00:42:12.893	2022-02-28 13:38:42.557	200	22	Si29,Ca43,Ti49,Zr91,La139,Ce140,Pr141,Nd146,Sm147,Eu153,Gd157,Dy163,Er166,Yb172,Lu175,Hf178,Pb204,Pb206,Pb207,Pb208,Th232,U238	168 - 9.d
/Users/224742i/Desktop/2019-06-11 GA UPb 7700/095 - 18.csv	2019-06-11 19:08:18.000	2019-06-11 19:10:02.893	2022-02-28 13:38:42.571	200	22	Si29,Ca43,Ti49,Zr91,La139,Ce140,Pr141,Nd146,Sm147,Eu153,Gd157,Dy163,Er166,Yb172,Lu175,Hf178,Pb204,Pb206,Pb207,Pb208,Th232,U238	095 - 18.d
/Users/224742i/Desktop/2019-06-11 GA UPb 7700/P1 - 5.csv	2019-06-12 06:24:00.000	2019-06-12 06:25:44.893	2022-02-28 13:38:42.597	200	22	Si29,Ca43,Ti49,Zr91,La139,Ce140,Pr141,Nd146,Sm147,Eu153,Gd157,Dy163,Er166,Yb172,Lu175,Hf178,Pb204,Pb206,Pb207,Pb208,Th232,U238	P1 - 5.d
/Users/224742i/Desktop/2019-06-11 GA UPb 7700/095 - 24.csv	2019-06-11 19:31:54.000	2019-06-11 19:33:38.893	2022-02-28 13:38:42.657	200	22	Si29,Ca43,Ti49,Zr91,La139,Ce140,Pr141,Nd146,Sm147,Eu153,Gd157,Dy163,Er166,Yb172,Lu175,Hf178,Pb204,Pb206,Pb207,Pb208,Th232,U238	095 - 24.d
/Users/224742i/Desktop/2019-06-11 GA UPb 7700/181 - 3.csv	2019-06-11 21:46:38.000	2019-06-11 21:48:22.892	2022-02-28 13:38:42.686	200	22	Si29,Ca43,Ti49,Zr91,La139,Ce140,Pr141,Nd146,Sm147,Eu153,Gd157,Dy163,Er166,Yb172,Lu175,Hf178,Pb204,Pb206,Pb207,Pb208,Th232,U238	181 - 3.d
/Users/224742i/Desktop/2019-06-11 GA UPb 7700/9119 - 6.csv	2019-06-12 03:21:12.000	2019-06-12 03:22:56.893	2022-02-28 13:38:42.699	200	22	Si29,Ca43,Ti49,Zr91,La139,Ce140,Pr141,Nd146,Sm147,Eu153,Gd157,Dy163,Er166,Yb172,Lu175,Hf178,Pb204,Pb206,Pb207,Pb208,Th232,U238	9119 - 6.d
/Users/224742i/Desktop/2019-06-11 GA UPb 7700/mud - 12.csv	2019-06-12 01:10:17.000	2019-06-12 01:12:01.893	2022-02-28 13:38:42.712	200	22	Si29,Ca43,Ti49,Zr91,La139,Ce140,Pr141,Nd146,Sm147,Eu153,Gd157,Dy163,Er166,Yb172,Lu175,Hf178,Pb204,Pb206,Pb207,Pb208,Th232,U238	mud - 12.d
/Users/224742i/Desktop/2019-06-11 GA UPb 7700/181 - 21.csv	2019-06-11 22:46:45.000	2019-06-11 22:48:29.893	2022-02-28 13:38:42.741	200	22	Si29,Ca43,Ti49,Zr91,La139,Ce140,Pr141,Nd146,Sm147,Eu153,Gd157,Dy163,Er166,Yb172,Lu175,Hf178,Pb204,Pb206,Pb207,Pb208,Th232,U238	181 - 21.d
/Users/224742i/Desktop/2019-06-11 GA UPb 7700/C915 - 14.csv	2019-06-11 17:34:15.000	2019-06-11 17:35:59.893	2022-02-28 13:38:42.756	200	22	Si29,Ca43,Ti49,Zr91,La139,Ce140,Pr141,Nd146,Sm147,Eu153,Gd157,Dy163,Er166,Yb172,Lu175,Hf178,Pb204,Pb206,Pb207,Pb208,Th232,U238	C915 - 14.d
/Users/224742i/Desktop/2019-06-11 GA UPb 7700/9119 - 9.csv	2019-06-12 03:27:32.000	2019-06-12 03:29:16.893	2022-02-28 13:38:36.675	200	22	Si29,Ca43,Ti49,Zr91,La139,Ce140,Pr141,Nd146,Sm147,Eu153,Gd157,Dy163,Er166,Yb172,Lu175,Hf178,Pb204,Pb206,Pb207,Pb208,Th232,U238	9119 - 9.d
/Users/224742i/Desktop/2019-06-11 GA UPb 7700/C915 - 28.csv	2019-06-11 18:03:59.000	2019-06-11 18:05:43.893	2022-02-28 13:38:42.770	200	22	Si29,Ca43,Ti49,Zr91,La139,Ce140,Pr141,Nd146,Sm147,Eu153,Gd157,Dy163,Er166,Yb172,Lu175,Hf178,Pb204,Pb206,Pb207,Pb208,Th232,U238	C915 - 28.d
/Users/224742i/Desktop/2019-06-11 GA UPb 7700/R33 - 2.csv	2019-06-11 15:29:46.000	2019-06-11 15:31:30.893	2022-02-28 13:38:42.799	200	22	Si29,Ca43,Ti49,Zr91,La139,Ce140,Pr141,Nd146,Sm147,Eu153,Gd157,Dy163,Er166,Yb172,Lu175,Hf178,Pb204,Pb206,Pb207,Pb208,Th232,U238	R33 - 2.d
/Users/224742i/Desktop/2019-06-11 GA UPb 7700/009 - 11.csv	2019-06-12 02:19:11.000	2019-06-12 02:20:55.893	2022-02-28 13:38:42.820	200	22	Si29,Ca43,Ti49,Zr91,La139,Ce140,Pr141,Nd146,Sm147,Eu153,Gd157,Dy163,Er166,Yb172,Lu175,Hf178,Pb204,Pb206,Pb207,Pb208,Th232,U238	009 - 11.d
/Users/224742i/Desktop/2019-06-11 GA UPb 7700/9088 - 3.csv	2019-06-12 04:32:09.000	2019-06-12 04:33:53.893	2022-02-28 13:38:36.680	200	22	Si29,Ca43,Ti49,Zr91,La139,Ce140,Pr141,Nd146,Sm147,Eu153,Gd157,Dy163,Er166,Yb172,Lu175,Hf178,Pb204,Pb206,Pb207,Pb208,Th232,U238	9088 - 3.d
/Users/224742i/Desktop/2019-06-11 GA UPb 7700/P1n - 3.csv	2019-06-11 18:44:44.000	2019-06-11 18:46:28.893	2022-02-28 13:38:36.685	200	22	Si29,Ca43,Ti49,Zr91,La139,Ce140,Pr141,Nd146,Sm147,Eu153,Gd157,Dy163,Er166,Yb172,Lu175,Hf178,Pb204,Pb206,Pb207,Pb208,Th232,U238	P1n - 3.d
/Users/224742i/Desktop/2019-06-11 GA UPb 7700/181 - 12.csv	2019-06-11 22:27:36.000	2019-06-11 22:29:20.893	2022-02-28 13:38:36.690	200	22	Si29,Ca43,Ti49,Zr91,La139,Ce140,Pr141,Nd146,Sm147,Eu153,Gd157,Dy163,Er166,Yb172,Lu175,Hf178,Pb204,Pb206,Pb207,Pb208,Th232,U238	181 - 12.d
/Users/224742i/Desktop/2019-06-11 GA UPb 7700/91500 - 2.csv	2019-06-11 15:23:14.000	2019-06-11 15:24:58.893	2022-02-28 13:38:36.696	200	22	Si29,Ca43,Ti49,Zr91,La139,Ce140,Pr141,Nd146,Sm147,Eu153,Gd157,Dy163,Er166,Yb172,Lu175,Hf178,Pb204,Pb206,Pb207,Pb208,Th232,U238	91500 - 2.d
/Users/224742i/Desktop/2019-06-11 GA UPb 7700/009 - 5.csv	2019-06-12 01:44:35.000	2019-06-12 01:46:19.893	2022-02-28 13:38:36.700	200	22	Si29,Ca43,Ti49,Zr91,La139,Ce140,Pr141,Nd146,Sm147,Eu153,Gd157,Dy163,Er166,Yb172,Lu175,Hf178,Pb204,Pb206,Pb207,Pb208,Th232,U238	009 - 5.d
/Users/224742i/Desktop/2019-06-11 GA UPb 7700/610 - 1.csv	2019-06-11 15:01:31.000	2019-06-11 15:03:15.893	2022-02-28 13:38:36.713	200	22	Si29,Ca43,Ti49,Zr91,La139,Ce140,Pr141,Nd146,Sm147,Eu153,Gd157,Dy163,Er166,Yb172,Lu175,Hf178,Pb204,Pb206,Pb207,Pb208,Th232,U238	610 - 1.d
/Users/224742i/Desktop/2019-06-11 GA UPb 7700/610 - 3.csv	2019-06-11 18:36:01.000	2019-06-11 18:37:45.893	2022-02-28 13:38:36.334	200	22	Si29,Ca43,Ti49,Zr91,La139,Ce140,Pr141,Nd146,Sm147,Eu153,Gd157,Dy163,Er166,Yb172,Lu175,Hf178,Pb204,Pb206,Pb207,Pb208,Th232,U238	610 - 3.d
/Users/224742i/Desktop/2019-06-11 GA UPb 7700/C915 - 27.csv	2019-06-11 18:01:49.000	2019-06-11 18:03:33.893	2022-02-28 13:38:36.718	200	22	Si29,Ca43,Ti49,Zr91,La139,Ce140,Pr141,Nd146,Sm147,Eu153,Gd157,Dy163,Er166,Yb172,Lu175,Hf178,Pb204,Pb206,Pb207,Pb208,Th232,U238	C915 - 27.d
/Users/224742i/Desktop/2019-06-11 GA UPb 7700/009 - 22.csv	2019-06-12 02:42:43.000	2019-06-12 02:44:27.893	2022-02-28 13:38:36.722	200	22	Si29,Ca43,Ti49,Zr91,La139,Ce140,Pr141,Nd146,Sm147,Eu153,Gd157,Dy163,Er166,Yb172,Lu175,Hf178,Pb204,Pb206,Pb207,Pb208,Th232,U238	009 - 22.d
/Users/224742i/Desktop/2019-06-11 GA UPb 7700/FC1 - 1.csv	2019-06-11 15:05:48.000	2019-06-11 15:07:32.893	2022-02-28 13:38:36.729	200	22	Si29,Ca43,Ti49,Zr91,La139,Ce140,Pr141,Nd146,Sm147,Eu153,Gd157,Dy163,Er166,Yb172,Lu175,Hf178,Pb204,Pb206,Pb207,Pb208,Th232,U238	FC1 - 1.d
/Users/224742i/Desktop/2019-06-11 GA UPb 7700/R33 - 9.csv	2019-06-11 22:10:03.000	2019-06-11 22:11:47.893	2022-02-28 13:38:36.733	200	22	Si29,Ca43,Ti49,Zr91,La139,Ce140,Pr141,Nd146,Sm147,Eu153,Gd157,Dy163,Er166,Yb172,Lu175,Hf178,Pb204,Pb206,Pb207,Pb208,Th232,U238	R33 - 9.d
/Users/224742i/Desktop/2019-06-11 GA UPb 7700/FC1 - 5.csv	2019-06-11 22:16:38.000	2019-06-11 22:18:22.893	2022-02-28 13:38:36.740	200	22	Si29,Ca43,Ti49,Zr91,La139,Ce140,Pr141,Nd146,Sm147,Eu153,Gd157,Dy163,Er166,Yb172,Lu175,Hf178,Pb204,Pb206,Pb207,Pb208,Th232,U238	FC1 - 5.d
/Users/224742i/Desktop/2019-06-11 GA UPb 7700/009 - 26.csv	2019-06-12 02:51:12.000	2019-06-12 02:52:56.893	2022-02-28 13:38:36.745	200	22	Si29,Ca43,Ti49,Zr91,La139,Ce140,Pr141,Nd146,Sm147,Eu153,Gd157,Dy163,Er166,Yb172,Lu175,Hf178,Pb204,Pb206,Pb207,Pb208,Th232,U238	009 - 26.d
/Users/224742i/Desktop/2019-06-11 GA UPb 7700/C915 - 23.csv	2019-06-11 17:53:19.000	2019-06-11 17:55:03.893	2022-02-28 13:38:36.749	200	22	Si29,Ca43,Ti49,Zr91,La139,Ce140,Pr141,Nd146,Sm147,Eu153,Gd157,Dy163,Er166,Yb172,Lu175,Hf178,Pb204,Pb206,Pb207,Pb208,Th232,U238	C915 - 23.d
/Users/224742i/Desktop/2019-06-11 GA UPb 7700/610 - 5.csv	2019-06-11 22:12:18.000	2019-06-11 22:14:02.893	2022-02-28 13:38:36.798	200	22	Si29,Ca43,Ti49,Zr91,La139,Ce140,Pr141,Nd146,Sm147,Eu153,Gd157,Dy163,Er166,Yb172,Lu175,Hf178,Pb204,Pb206,Pb207,Pb208,Th232,U238	610 - 5.d
/Users/224742i/Desktop/2019-06-11 GA UPb 7700/009 - 1.csv	2019-06-12 01:36:02.000	2019-06-12 01:37:46.893	2022-02-28 13:38:36.803	200	22	Si29,Ca43,Ti49,Zr91,La139,Ce140,Pr141,Nd146,Sm147,Eu153,Gd157,Dy163,Er166,Yb172,Lu175,Hf178,Pb204,Pb206,Pb207,Pb208,Th232,U238	009 - 1.d
/Users/224742i/Desktop/2019-06-11 GA UPb 7700/181 - 16.csv	2019-06-11 22:36:07.000	2019-06-11 22:37:51.893	2022-02-28 13:38:36.809	200	22	Si29,Ca43,Ti49,Zr91,La139,Ce140,Pr141,Nd146,Sm147,Eu153,Gd157,Dy163,Er166,Yb172,Lu175,Hf178,Pb204,Pb206,Pb207,Pb208,Th232,U238	181 - 16.d
/Users/224742i/Desktop/2019-06-11 GA UPb 7700/009 - 7.csv	2019-06-12 02:01:57.000	2019-06-12 02:03:41.893	2022-02-28 13:38:36.337	200	22	Si29,Ca43,Ti49,Zr91,La139,Ce140,Pr141,Nd146,Sm147,Eu153,Gd157,Dy163,Er166,Yb172,Lu175,Hf178,Pb204,Pb206,Pb207,Pb208,Th232,U238	009 - 7.d
/Users/224742i/Desktop/2019-06-11 GA UPb 7700/91500 - 6.csv	2019-06-11 19:14:37.000	2019-06-11 19:16:21.893	2022-02-28 13:38:36.814	200	22	Si29,Ca43,Ti49,Zr91,La139,Ce140,Pr141,Nd146,Sm147,Eu153,Gd157,Dy163,Er166,Yb172,Lu175,Hf178,Pb204,Pb206,Pb207,Pb208,Th232,U238	91500 - 6.d
/Users/224742i/Desktop/2019-06-11 GA UPb 7700/ogc - 4.csv	2019-06-11 20:31:41.000	2019-06-11 20:33:25.893	2022-02-28 13:38:36.819	200	22	Si29,Ca43,Ti49,Zr91,La139,Ce140,Pr141,Nd146,Sm147,Eu153,Gd157,Dy163,Er166,Yb172,Lu175,Hf178,Pb204,Pb206,Pb207,Pb208,Th232,U238	ogc - 4.d
/Users/224742i/Desktop/2019-06-11 GA UPb 7700/P1n - 7.csv	2019-06-12 01:57:34.000	2019-06-12 01:59:18.893	2022-02-28 13:38:36.827	200	22	Si29,Ca43,Ti49,Zr91,La139,Ce140,Pr141,Nd146,Sm147,Eu153,Gd157,Dy163,Er166,Yb172,Lu175,Hf178,Pb204,Pb206,Pb207,Pb208,Th232,U238	P1n - 7.d
/Users/224742i/Desktop/2019-06-11 GA UPb 7700/9088 - 7.csv	2019-06-12 04:40:40.000	2019-06-12 04:42:24.893	2022-02-28 13:38:36.831	200	22	Si29,Ca43,Ti49,Zr91,La139,Ce140,Pr141,Nd146,Sm147,Eu153,Gd157,Dy163,Er166,Yb172,Lu175,Hf178,Pb204,Pb206,Pb207,Pb208,Th232,U238	9088 - 7.d
/Users/224742i/Desktop/2019-06-11 GA UPb 7700/gj - 1.csv	2019-06-11 15:16:48.000	2019-06-11 15:18:32.893	2022-02-28 13:38:36.836	200	22	Si29,Ca43,Ti49,Zr91,La139,Ce140,Pr141,Nd146,Sm147,Eu153,Gd157,Dy163,Er166,Yb172,Lu175,Hf178,Pb204,Pb206,Pb207,Pb208,Th232,U238	gj - 1.d
/Users/224742i/Desktop/2019-06-11 GA UPb 7700/168 - 2.csv	2019-06-12 00:25:40.000	2019-06-12 00:27:24.893	2022-02-28 13:38:36.867	200	22	Si29,Ca43,Ti49,Zr91,La139,Ce140,Pr141,Nd146,Sm147,Eu153,Gd157,Dy163,Er166,Yb172,Lu175,Hf178,Pb204,Pb206,Pb207,Pb208,Th232,U238	168 - 2.d
/Users/224742i/Desktop/2019-06-11 GA UPb 7700/095 - 13.csv	2019-06-11 18:57:38.000	2019-06-11 18:59:22.893	2022-02-28 13:38:36.872	200	22	Si29,Ca43,Ti49,Zr91,La139,Ce140,Pr141,Nd146,Sm147,Eu153,Gd157,Dy163,Er166,Yb172,Lu175,Hf178,Pb204,Pb206,Pb207,Pb208,Th232,U238	095 - 13.d
/Users/224742i/Desktop/2019-06-11 GA UPb 7700/181 - 8.csv	2019-06-11 21:57:12.000	2019-06-11 21:58:56.893	2022-02-28 13:38:36.880	200	22	Si29,Ca43,Ti49,Zr91,La139,Ce140,Pr141,Nd146,Sm147,Eu153,Gd157,Dy163,Er166,Yb172,Lu175,Hf178,Pb204,Pb206,Pb207,Pb208,Th232,U238	181 - 8.d
/Users/224742i/Desktop/2019-06-11 GA UPb 7700/181 - 9.csv	2019-06-11 21:59:22.000	2019-06-11 22:01:06.893	2022-02-28 13:38:36.885	200	22	Si29,Ca43,Ti49,Zr91,La139,Ce140,Pr141,Nd146,Sm147,Eu153,Gd157,Dy163,Er166,Yb172,Lu175,Hf178,Pb204,Pb206,Pb207,Pb208,Th232,U238	181 - 9.d
/Users/224742i/Desktop/2019-06-11 GA UPb 7700/168 - 3.csv	2019-06-12 00:27:45.000	2019-06-12 00:29:29.893	2022-02-28 13:38:36.889	200	22	Si29,Ca43,Ti49,Zr91,La139,Ce140,Pr141,Nd146,Sm147,Eu153,Gd157,Dy163,Er166,Yb172,Lu175,Hf178,Pb204,Pb206,Pb207,Pb208,Th232,U238	168 - 3.d
/Users/224742i/Desktop/2019-06-11 GA UPb 7700/181 - 10.csv	2019-06-11 22:01:27.000	2019-06-11 22:03:11.893	2022-02-28 13:38:36.341	200	22	Si29,Ca43,Ti49,Zr91,La139,Ce140,Pr141,Nd146,Sm147,Eu153,Gd157,Dy163,Er166,Yb172,Lu175,Hf178,Pb204,Pb206,Pb207,Pb208,Th232,U238	181 - 10.d
/Users/224742i/Desktop/2019-06-11 GA UPb 7700/095 - 12.csv	2019-06-11 18:55:33.000	2019-06-11 18:57:17.892	2022-02-28 13:38:36.897	200	22	Si29,Ca43,Ti49,Zr91,La139,Ce140,Pr141,Nd146,Sm147,Eu153,Gd157,Dy163,Er166,Yb172,Lu175,Hf178,Pb204,Pb206,Pb207,Pb208,Th232,U238	095 - 12.d
/Users/224742i/Desktop/2019-06-11 GA UPb 7700/P1n - 6.csv	2019-06-12 00:10:17.000	2019-06-12 00:12:01.893	2022-02-28 13:38:36.902	200	22	Si29,Ca43,Ti49,Zr91,La139,Ce140,Pr141,Nd146,Sm147,Eu153,Gd157,Dy163,Er166,Yb172,Lu175,Hf178,Pb204,Pb206,Pb207,Pb208,Th232,U238	P1n - 6.d
/Users/224742i/Desktop/2019-06-11 GA UPb 7700/mud - 18.csv	2019-06-12 06:06:32.000	2019-06-12 06:08:16.893	2022-02-28 13:38:36.911	200	22	Si29,Ca43,Ti49,Zr91,La139,Ce140,Pr141,Nd146,Sm147,Eu153,Gd157,Dy163,Er166,Yb172,Lu175,Hf178,Pb204,Pb206,Pb207,Pb208,Th232,U238	mud - 18.d
/Users/224742i/Desktop/2019-06-11 GA UPb 7700/9088 - 6.csv	2019-06-12 04:38:34.000	2019-06-12 04:40:18.893	2022-02-28 13:38:36.959	200	22	Si29,Ca43,Ti49,Zr91,La139,Ce140,Pr141,Nd146,Sm147,Eu153,Gd157,Dy163,Er166,Yb172,Lu175,Hf178,Pb204,Pb206,Pb207,Pb208,Th232,U238	9088 - 6.d
/Users/224742i/Desktop/2019-06-11 GA UPb 7700/ogc - 5.csv	2019-06-11 22:18:45.000	2019-06-11 22:20:29.893	2022-02-28 13:38:36.963	200	22	Si29,Ca43,Ti49,Zr91,La139,Ce140,Pr141,Nd146,Sm147,Eu153,Gd157,Dy163,Er166,Yb172,Lu175,Hf178,Pb204,Pb206,Pb207,Pb208,Th232,U238	ogc - 5.d
/Users/224742i/Desktop/2019-06-11 GA UPb 7700/91500 - 7.csv	2019-06-11 20:08:03.000	2019-06-11 20:09:47.892	2022-02-28 13:38:36.971	200	22	Si29,Ca43,Ti49,Zr91,La139,Ce140,Pr141,Nd146,Sm147,Eu153,Gd157,Dy163,Er166,Yb172,Lu175,Hf178,Pb204,Pb206,Pb207,Pb208,Th232,U238	91500 - 7.d
/Users/224742i/Desktop/2019-06-11 GA UPb 7700/181 - 17.csv	2019-06-11 22:38:16.000	2019-06-11 22:40:00.893	2022-02-28 13:38:36.976	200	22	Si29,Ca43,Ti49,Zr91,La139,Ce140,Pr141,Nd146,Sm147,Eu153,Gd157,Dy163,Er166,Yb172,Lu175,Hf178,Pb204,Pb206,Pb207,Pb208,Th232,U238	181 - 17.d
/Users/224742i/Desktop/2019-06-11 GA UPb 7700/610 - 4.csv	2019-06-11 20:25:15.000	2019-06-11 20:26:59.893	2022-02-28 13:38:36.984	200	22	Si29,Ca43,Ti49,Zr91,La139,Ce140,Pr141,Nd146,Sm147,Eu153,Gd157,Dy163,Er166,Yb172,Lu175,Hf178,Pb204,Pb206,Pb207,Pb208,Th232,U238	610 - 4.d
/Users/224742i/Desktop/2019-06-11 GA UPb 7700/C915 - 22.csv	2019-06-11 17:51:14.000	2019-06-11 17:52:58.893	2022-02-28 13:38:36.989	200	22	Si29,Ca43,Ti49,Zr91,La139,Ce140,Pr141,Nd146,Sm147,Eu153,Gd157,Dy163,Er166,Yb172,Lu175,Hf178,Pb204,Pb206,Pb207,Pb208,Th232,U238	C915 - 22.d
/Users/224742i/Desktop/2019-06-11 GA UPb 7700/FC1 - 4.csv	2019-06-11 20:29:35.000	2019-06-11 20:31:19.893	2022-02-28 13:38:36.994	200	22	Si29,Ca43,Ti49,Zr91,La139,Ce140,Pr141,Nd146,Sm147,Eu153,Gd157,Dy163,Er166,Yb172,Lu175,Hf178,Pb204,Pb206,Pb207,Pb208,Th232,U238	FC1 - 4.d
/Users/224742i/Desktop/2019-06-11 GA UPb 7700/ogc - 2.csv	2019-06-11 16:55:22.000	2019-06-11 16:57:06.893	2022-02-28 13:38:36.344	200	22	Si29,Ca43,Ti49,Zr91,La139,Ce140,Pr141,Nd146,Sm147,Eu153,Gd157,Dy163,Er166,Yb172,Lu175,Hf178,Pb204,Pb206,Pb207,Pb208,Th232,U238	ogc - 2.d
/Users/224742i/Desktop/2019-06-11 GA UPb 7700/R33 - 8.csv	2019-06-11 21:18:45.000	2019-06-11 21:20:29.893	2022-02-28 13:38:37.002	200	22	Si29,Ca43,Ti49,Zr91,La139,Ce140,Pr141,Nd146,Sm147,Eu153,Gd157,Dy163,Er166,Yb172,Lu175,Hf178,Pb204,Pb206,Pb207,Pb208,Th232,U238	R33 - 8.d
/Users/224742i/Desktop/2019-06-11 GA UPb 7700/009 - 27.csv	2019-06-12 02:53:17.000	2019-06-12 02:55:01.892	2022-02-28 13:38:37.014	200	22	Si29,Ca43,Ti49,Zr91,La139,Ce140,Pr141,Nd146,Sm147,Eu153,Gd157,Dy163,Er166,Yb172,Lu175,Hf178,Pb204,Pb206,Pb207,Pb208,Th232,U238	009 - 27.d
/Users/224742i/Desktop/2019-06-11 GA UPb 7700/009 - 25.csv	2019-06-12 02:49:02.000	2019-06-12 02:50:46.893	2022-02-28 13:38:37.022	200	22	Si29,Ca43,Ti49,Zr91,La139,Ce140,Pr141,Nd146,Sm147,Eu153,Gd157,Dy163,Er166,Yb172,Lu175,Hf178,Pb204,Pb206,Pb207,Pb208,Th232,U238	009 - 25.d
/Users/224742i/Desktop/2019-06-11 GA UPb 7700/FC1 - 6.csv	2019-06-12 00:05:53.000	2019-06-12 00:07:37.893	2022-02-28 13:38:37.028	200	22	Si29,Ca43,Ti49,Zr91,La139,Ce140,Pr141,Nd146,Sm147,Eu153,Gd157,Dy163,Er166,Yb172,Lu175,Hf178,Pb204,Pb206,Pb207,Pb208,Th232,U238	FC1 - 6.d
/Users/224742i/Desktop/2019-06-11 GA UPb 7700/009 - 19.csv	2019-06-12 02:36:17.000	2019-06-12 02:38:01.892	2022-02-28 13:38:37.034	200	22	Si29,Ca43,Ti49,Zr91,La139,Ce140,Pr141,Nd146,Sm147,Eu153,Gd157,Dy163,Er166,Yb172,Lu175,Hf178,Pb204,Pb206,Pb207,Pb208,Th232,U238	009 - 19.d
/Users/224742i/Desktop/2019-06-11 GA UPb 7700/C915 - 20.csv	2019-06-11 17:46:59.000	2019-06-11 17:48:43.892	2022-02-28 13:38:37.042	200	22	Si29,Ca43,Ti49,Zr91,La139,Ce140,Pr141,Nd146,Sm147,Eu153,Gd157,Dy163,Er166,Yb172,Lu175,Hf178,Pb204,Pb206,Pb207,Pb208,Th232,U238	C915 - 20.d
/Users/224742i/Desktop/2019-06-11 GA UPb 7700/610 - 6.csv	2019-06-12 00:01:33.000	2019-06-12 00:03:17.893	2022-02-28 13:38:37.047	200	22	Si29,Ca43,Ti49,Zr91,La139,Ce140,Pr141,Nd146,Sm147,Eu153,Gd157,Dy163,Er166,Yb172,Lu175,Hf178,Pb204,Pb206,Pb207,Pb208,Th232,U238	610 - 6.d
/Users/224742i/Desktop/2019-06-11 GA UPb 7700/009 - 2.csv	2019-06-12 01:38:16.000	2019-06-12 01:40:00.893	2022-02-28 13:38:37.052	200	22	Si29,Ca43,Ti49,Zr91,La139,Ce140,Pr141,Nd146,Sm147,Eu153,Gd157,Dy163,Er166,Yb172,Lu175,Hf178,Pb204,Pb206,Pb207,Pb208,Th232,U238	009 - 2.d
/Users/224742i/Desktop/2019-06-11 GA UPb 7700/181 - 15.csv	2019-06-11 22:34:02.000	2019-06-11 22:35:46.892	2022-02-28 13:38:37.061	200	22	Si29,Ca43,Ti49,Zr91,La139,Ce140,Pr141,Nd146,Sm147,Eu153,Gd157,Dy163,Er166,Yb172,Lu175,Hf178,Pb204,Pb206,Pb207,Pb208,Th232,U238	181 - 15.d
/Users/224742i/Desktop/2019-06-11 GA UPb 7700/91500 - 5.csv	2019-06-11 18:10:20.000	2019-06-11 18:12:04.893	2022-02-28 13:38:37.104	200	22	Si29,Ca43,Ti49,Zr91,La139,Ce140,Pr141,Nd146,Sm147,Eu153,Gd157,Dy163,Er166,Yb172,Lu175,Hf178,Pb204,Pb206,Pb207,Pb208,Th232,U238	91500 - 5.d
/Users/224742i/Desktop/2019-06-11 GA UPb 7700/P1n - 10.csv	2019-06-12 06:19:39.000	2019-06-12 06:21:23.893	2022-02-28 13:38:36.365	200	22	Si29,Ca43,Ti49,Zr91,La139,Ce140,Pr141,Nd146,Sm147,Eu153,Gd157,Dy163,Er166,Yb172,Lu175,Hf178,Pb204,Pb206,Pb207,Pb208,Th232,U238	P1n - 10.d
/Users/224742i/Desktop/2019-06-11 GA UPb 7700/ogc - 7.csv	2019-06-12 01:55:23.000	2019-06-12 01:57:07.893	2022-02-28 13:38:37.114	200	22	Si29,Ca43,Ti49,Zr91,La139,Ce140,Pr141,Nd146,Sm147,Eu153,Gd157,Dy163,Er166,Yb172,Lu175,Hf178,Pb204,Pb206,Pb207,Pb208,Th232,U238	ogc - 7.d
/Users/224742i/Desktop/2019-06-11 GA UPb 7700/9088 - 4.csv	2019-06-12 04:34:19.000	2019-06-12 04:36:03.893	2022-02-28 13:38:37.119	200	22	Si29,Ca43,Ti49,Zr91,La139,Ce140,Pr141,Nd146,Sm147,Eu153,Gd157,Dy163,Er166,Yb172,Lu175,Hf178,Pb204,Pb206,Pb207,Pb208,Th232,U238	9088 - 4.d
/Users/224742i/Desktop/2019-06-11 GA UPb 7700/P1n - 4.csv	2019-06-11 20:33:58.000	2019-06-11 20:35:42.893	2022-02-28 13:38:37.124	200	22	Si29,Ca43,Ti49,Zr91,La139,Ce140,Pr141,Nd146,Sm147,Eu153,Gd157,Dy163,Er166,Yb172,Lu175,Hf178,Pb204,Pb206,Pb207,Pb208,Th232,U238	P1n - 4.d
/Users/224742i/Desktop/2019-06-11 GA UPb 7700/095 - 10.csv	2019-06-11 18:51:20.000	2019-06-11 18:53:04.893	2022-02-28 13:38:37.133	200	22	Si29,Ca43,Ti49,Zr91,La139,Ce140,Pr141,Nd146,Sm147,Eu153,Gd157,Dy163,Er166,Yb172,Lu175,Hf178,Pb204,Pb206,Pb207,Pb208,Th232,U238	095 - 10.d
/Users/224742i/Desktop/2019-06-11 GA UPb 7700/168 - 1.csv	2019-06-12 00:23:20.000	2019-06-12 00:25:04.893	2022-02-28 13:38:37.139	200	22	Si29,Ca43,Ti49,Zr91,La139,Ce140,Pr141,Nd146,Sm147,Eu153,Gd157,Dy163,Er166,Yb172,Lu175,Hf178,Pb204,Pb206,Pb207,Pb208,Th232,U238	168 - 1.d
/Users/224742i/Desktop/2019-06-11 GA UPb 7700/gj - 2.csv	2019-06-11 15:25:29.000	2019-06-11 15:27:13.893	2022-02-28 13:38:37.149	200	22	Si29,Ca43,Ti49,Zr91,La139,Ce140,Pr141,Nd146,Sm147,Eu153,Gd157,Dy163,Er166,Yb172,Lu175,Hf178,Pb204,Pb206,Pb207,Pb208,Th232,U238	gj - 2.d
/Users/224742i/Desktop/2019-06-11 GA UPb 7700/gj - 3.csv	2019-06-11 16:16:47.000	2019-06-11 16:18:31.893	2022-02-28 13:38:37.155	200	22	Si29,Ca43,Ti49,Zr91,La139,Ce140,Pr141,Nd146,Sm147,Eu153,Gd157,Dy163,Er166,Yb172,Lu175,Hf178,Pb204,Pb206,Pb207,Pb208,Th232,U238	gj - 3.d
/Users/224742i/Desktop/2019-06-11 GA UPb 7700/095 - 11.csv	2019-06-11 18:53:24.000	2019-06-11 18:55:08.893	2022-02-28 13:38:37.182	200	22	Si29,Ca43,Ti49,Zr91,La139,Ce140,Pr141,Nd146,Sm147,Eu153,Gd157,Dy163,Er166,Yb172,Lu175,Hf178,Pb204,Pb206,Pb207,Pb208,Th232,U238	095 - 11.d
/Users/224742i/Desktop/2019-06-11 GA UPb 7700/9088 - 5.csv	2019-06-12 04:36:24.000	2019-06-12 04:38:08.893	2022-02-28 13:38:37.192	200	22	Si29,Ca43,Ti49,Zr91,La139,Ce140,Pr141,Nd146,Sm147,Eu153,Gd157,Dy163,Er166,Yb172,Lu175,Hf178,Pb204,Pb206,Pb207,Pb208,Th232,U238	9088 - 5.d
/Users/224742i/Desktop/2019-06-11 GA UPb 7700/P1n - 5.csv	2019-06-11 22:21:01.000	2019-06-11 22:22:45.893	2022-02-28 13:38:37.197	200	22	Si29,Ca43,Ti49,Zr91,La139,Ce140,Pr141,Nd146,Sm147,Eu153,Gd157,Dy163,Er166,Yb172,Lu175,Hf178,Pb204,Pb206,Pb207,Pb208,Th232,U238	P1n - 5.d
Laser Log Files
File	File start time	File end time	Time file loaded	Samples	Offset (s)	Widths

## Sheet: DRS Settings
Data Reduction Scheme Settings
U-Pb Geochronology
238U/235U	137.818
BeamSecondsMaximum	60
BeamSecondsMethod	Cutoff threshold
BeamSecondsSensitivity	100
DefaultFitType	Exponential with linear
FitEndCrop	1
FitStartCrop	1
IndexChannel	U238
MaskChannel	U238
MaskMethod	Cutoff
MaskResults	TRUE
MaskThreshold	100
MaskTrim	0
Pb206_U238
Pb207_U235
Pb208_Th232
ReferenceMaterial	Z_91500_Schoene
UIsotopeCutoff	2000000
UIsotopeMode	U238
l232	4.9475e-11
l235	9.8485e-10
l238	1.55125e-10

## Sheet: Reference Material Values
Reference Material Values
KF_Shap
Matrix
Description	"“Feldspar from Shap, northwest England“"
Data Source	"Tyrrell et al., J. Sed. Research, 2006, 76, 324-345."
URL
File Path	/Users/224742i/Documents/iolite/Reference materials/KF_Shap.json
Notes
Measurement	Units	Value	Uncertainty
Age	Ma	394	0
206Pb/204Pb	ratio	18.243	0.011
207Pb/204Pb	ratio	15.63	0.01
208Pb/204Pb	ratio	38.182	0.022
208Pb/206Pb	ratio	2.093	0
207Pb/206Pb	ratio	0.8568	0
Pb	ppm	50.2	1
S_BONN-NBS-6b
Matrix	(Fe,Ni)S, made similarly to Wohlgemuth-Ueberwasser et al., 2007. Contrib. Min. Pet. 154, 607-617.
Description	"synthetic ? doped with six PGE and Au"
Data Source	Chris Ballhaus, Bonn University, Germany
URL
File Path	/Users/224742i/Documents/iolite/Reference materials/S_BONN-NBS-6b.json
Notes	“values for Ag and Au likely underestimated by around 30% due to use of external glass standards."
Measurement	Units	Value	Uncertainty
Au	ppm	11.3	0.3
Ag	ppm	11.8	0.4
Ru	ppm	19.4	0.2
Rh	ppm	20.5	0.9
Pd	ppm	16.3	0.2
Os	ppm	22.9	1.5
Ir	ppm	20.8	0.4
Pt	ppm	17.6	0.2
Re	ppm	3.9	0.1
Fe	ppm	590000	2360
S	ppm	376000	1130
Ni	ppm	45600	45
A_Durango
Matrix	Apatite
Description	“yellow-green fluorapatite from the open pit Fe mine Cerro de Mercado, Durango City, Mexico. Trace element data from Chew et al., 2011, 2014. See Yang for compilation of variety of SmNd values obtained as there seems to be a range…“
Data Source	“Yang et al., 2014, Chem Geol 385 35-55 for Sr and 145/144, Fisher et al., 2011 for rest of SmNd“
URL
File Path	/Users/224742i/Documents/iolite/Reference materials/A_Durango.json
Notes
Measurement	Units	Value	Uncertainty
Age	ratio	31	0
Rb	ppm	0.12	0
Sr	ppm	482	0
Ba	ppm	1.7	0
Nb	ppm	1	0
Ta	ppm	0	0
Zr	ppm	1.4	0
Hf	ppm	0.23	0
Pb	ppm	0.9	0
Th	ppm	320	0
U	ppm	20	0
La	ppm	4285	0
Ce	ppm	5405	0
Pr	ppm	488	0
Nd	ppm	1677	0
Sm	ppm	237	0
Eu	ppm	21	0
Gd	ppm	204	0
Tb	ppm	28	0
Dy	ppm	154	0
Ho	ppm	33	0
Er	ppm	83	0
Tm	ppm	10	0
Yb	ppm	59	0
Lu	ppm	6	0
Y	ppm	911	0
Ca	ppm	399000	0
87Sr/86Sr	ratio	0.70634	0
84Sr/86Sr	ratio	0.0556	0
84Sr/88Sr	ratio	0.00664	0
87Rb/86Sr	ratio	0.0009	0
143Nd/144Nd	ratio	0.512489	1.2e-05
147Sm/144Nd	ratio	0.0751	0
145Nd/144Nd	ratio	0.348405	2.9e-05
A_FC
Matrix	Apatite
Description	“Duluth Anorthosite Apatite"
Data Source	“Paces and Miller, 1993“
URL
File Path	/Users/224742i/Documents/iolite/Reference materials/A_FC.json
Notes
Measurement	Units	Value	Uncertainty
Age	ratio	1099	0
206Pb/238U	ratio	0.182203	0.007937
207Pb/235U	ratio	0	0
208Pb/232Th	ratio	0	0
207Pb/206Pb	ratio	0.075393	0.003284
207Pb/206Pb(i)	ratio	0.075393	0.003284
c207Pb/206Pb	ratio	0.917013	0
206Pb/208Pb	ratio	0	0
206Pb/204Pb	ratio	0	0
207Pb/204Pb	ratio	0	0
208Pb/204Pb	ratio	0	0
Pb	ppm	0	0
Th	ppm	0	0
U	ppm	0	0
176Hf/177Hf	ratio	0	0
A_MAD
Matrix	Apatite
Description	Madagascar Apatite
Data Source	Thomson et al., 2012, G3
URL
File Path	/Users/224742i/Documents/iolite/Reference materials/A_MAD.json
Notes
Measurement	Units	Value	Uncertainty
Age	Ma	473.46	0
206Pb/238U	ratio	0.0762416	0
207Pb/235U	ratio	0.601257	0
208Pb/232Th	ratio	0	0
207Pb/206Pb	ratio	0.0571961	0
c207Pb/206Pb	ratio	0.8681	0
206Pb/208Pb	ratio	0	0
206Pb/204Pb	ratio	0	0
207Pb/204Pb	ratio	0	0
208Pb/204Pb	ratio	0	0
Pb	ppm	51.2	0
Th	ppm	798	0
U	ppm	22.2	0
176Hf/177Hf	ratio	0	0
87Sr/86Sr	ratio	0.7118	3e-05
87Rb/86Sr	ratio	0.0001	0.0002
A_MMC
Matrix	Apatite
Description	"McClure Mountain Apatite Apatite"
Data Source	"Schoene and Bowring, CMP, 2006"
URL
File Path	/Users/224742i/Documents/iolite/Reference materials/A_MMc.json
Notes
Measurement	Units	Value	Uncertainty
Age	ratio	523.51	0
206Pb/238U	ratio	0.0845981	0.00042299
207Pb/235U	ratio	0.674607	0.00337304
208Pb/232Th	ratio	0	0
207Pb/206Pb	ratio	0.0578348	0.000289174
c207Pb/206Pb	ratio	0.88198	0
c208Pb/204Pb	ratio	37.66	0
c207Pb/204Pb	ratio	15.47	0
c206Pb/204Pb	ratio	17.54	0
206Pb/208Pb	ratio	0	0
206Pb/204Pb	ratio	17.54	0
207Pb/204Pb	ratio	0	0
208Pb/204Pb	ratio	0	0
Pb	ppm	0	0
Th	ppm	71	0
U	ppm	23	0
176Hf/177Hf	ratio	0	0
A_McClure
Matrix	Apatite
Description	McClure Mountain Apatite Apatite
Data Source	Schoene and Bowring, CMP, 2006
URL
File Path	/Users/224742i/Documents/iolite/Reference materials/A_McClure.json
Notes
Measurement	Units	Value	Uncertainty
Age	Ma	523.51	0
206Pb/238U	ratio	0.0845981	0
207Pb/235U	ratio	0.674607	0
208Pb/232Th	ratio	0	0
207Pb/206Pb	ratio	0.0578348	0
c207Pb/206Pb	ratio	0.88198	0
206Pb/208Pb	ratio	0	0
206Pb/204Pb	ratio	0	0
207Pb/204Pb	ratio	0	0
208Pb/204Pb	ratio	0	0
Pb	ppm	0	0
Th	ppm	71	0
U	ppm	23	0
176Hf/177Hf	ratio	0	0
A_MudTankAp
Matrix	Apatite
Description	“unknown location, probably Madagascar, Apatite"
Data Source	“Yang et al., 2014, Chem Geol 385, 35-55”
URL
File Path	/Users/224742i/Documents/iolite/Reference materials/A_MudTankAp.json
Notes
Measurement	Units	Value	Uncertainty
Age	ratio	475	0
Rb	ppm	0.22	0
Sr	ppm	2681	0
Ba	ppm	83	0
Nb	ppm	0.42	0
Ta	ppm	0.03	0
Zr	ppm	1.9	0
Hf	ppm	0.1	0
Pb	ppm	3	0
Th	ppm	11	0
U	ppm	2.1	0
La	ppm	414	0
Ce	ppm	980	0
Pr	ppm	237	0
Nd	ppm	550	0
Sm	ppm	93	0
Eu	ppm	25	0
Gd	ppm	64	0
Tb	ppm	6.4	0
Dy	ppm	25	0
Ho	ppm	3.4	0
Er	ppm	6	0
Tm	ppm	0.5	0
Yb	ppm	2.4	0
Lu	ppm	0.25	0
Y	ppm	73	0
87Sr/86Sr	ratio	0.70302	0
84Sr/86Sr	ratio	0.0563	0
84Sr/88Sr	ratio	0.00673	0
87Rb/86Sr	ratio	0.0001	0
143Nd/144Nd	ratio	0.512361	0.000111
147Sm/144Nd	ratio	0.1012	0
145Nd/144Nd	ratio	0.348386	6.4e-05
A_OtterLake
Matrix	Apatite
Description	“Otter Lake, Quebec“
Data Source	“Yang et al., 2014, Chem Geol 385, 35-55”
URL
File Path	/Users/224742i/Documents/iolite/Reference materials/A_OtterLake.json
Notes
Measurement	Units	Value	Uncertainty
Age	ratio	913	7
Rb	ppm	0.43	0
Sr	ppm	1668	0
Ba	ppm	2	0
Nb	ppm	0.26	0
Ta	ppm	0.08	0
Zr	ppm	1.61	0
Hf	ppm	0.08	0
Pb	ppm	61	0
Th	ppm	753	0
U	ppm	99	0
La	ppm	2772	0
Ce	ppm	6832	0
Pr	ppm	832	0
Nd	ppm	3205	0
Sm	ppm	445	0
Eu	ppm	78	0
Gd	ppm	275	0
Tb	ppm	34	0
Dy	ppm	173	0
Ho	ppm	33	0
Er	ppm	85	0
Tm	ppm	11	0
Yb	ppm	68	0
Lu	ppm	8.4	0
Y	ppm	889	0
87Sr/86Sr	ratio	0.70421	0
84Sr/86Sr	ratio	0.0566	0
84Sr/88Sr	ratio	0.00676	0
87Rb/86Sr	ratio	0.0004	0
143Nd/144Nd	ratio	0.511942	4.5e-05
147Sm/144Nd	ratio	0.0827	0
145Nd/144Nd	ratio	0.348411	2.8e-05
B_FC1
Matrix	Baddeleyite
Description	FC-1, Duluth gabbro
Data Source	U-Pb: James B. Paces, James D. Miller, 1993, Precise U-Pb ages of Duluth Complex and related mafic intrusions, northeastern Minnesota: Geochronological insights to physical, petrogenetic, paleomagnetic, and tectonomagmatic processes associated with the 1.1 Ga Midcontinent Rift System: Journal of Geophysical Research, v. 98, p. 13997–14013.; Lu-Hf: Ibanez-Mejia, M., Gehrels, G.E., Ruiz, J., Vervoo…
URL
File Path	/Users/224742i/Documents/iolite/Reference materials/B_FC1.json
Notes
Measurement	Units	Value	Uncertainty
Age	ratio	1099	0.6
206Pb/238U	ratio	0.18587	0
207Pb/235U	ratio	1.9516	0
208Pb/232Th	ratio	0.0557	0
207Pb/206Pb	ratio	0.07614	0
176Hf/177Hf	unknown	0.282167	5e-06
B_Phal
Matrix	Baddeleyite
Description	Phalaborwa baddeleyite crystal
Data Source	U-Pb: Heaman, L.M., 2009, The application of U–Pb geochronology to mafic, ultramafic and alkaline rocks: An evaluation of three mineral standards: Chemical Geology, v. 261, p. 43–52.; Lu-Hf: Scherer, E., Münker, C., and Mezger, K., 2001, Calibration of the Lutetium-Hafnium Clock: Science, v. 293, p. 683–687.
URL
File Path	/Users/224742i/Documents/iolite/Reference materials/B_Phal.json
Notes
Measurement	Units	Value	Uncertainty
Age	ratio	2059.6	0.34
U	ppm	702	497
Th	ppm	8	9.3
Pb	ppm	194	84
206Pb/204Pb	unknown	82671	0
206Pb/238U	unknown	0.376052	7.4e-05
207Pb/235U	unknown	6.59677	0.00136
207Pb/206Pb	unknown	0.127231	4.6e-06
176Hf/177Hf	unknown	0.281193	1.4e-05
Sc	ppm	243	36
Y	ppm	12	6
Nb	ppm	422	138
La	ppm	0.6	0.3
Ce	ppm	4.1	2.3
Pr	ppm	0.23	0.04
Nd	ppm	0.99	0.23
Sm	ppm	1.3	0.2
Eu	ppm	0.35	0.04
Gd	ppm	1.7	0.6
Tb	ppm	0.36	0.16
Dy	ppm	2.6	1.6
Ho	ppm	0.73	0.45
Er	ppm	2.2	1.1
Tm	ppm	0.4	0.24
Yb	ppm	3.7	1.8
Lu	ppm	0.53	0.24
Hf	ppm	13224	1440
Ta	ppm	139	43
SiO2	wtpc_oxide	0.049	0.017
Al2O3	wtpc_oxide	0.028	0.011
TiO2	wtpc_oxide	0.133	0.092
FeO	wtpc_oxide	0.027	0.018
MgO	wtpc_oxide	0.018	0.013
MnO	wtpc_oxide	0.013	0.01
CaO	wtpc_oxide	0.01	0.008
Na2O	wtpc_oxide	0.002	0.006
K2O	wtpc_oxide	0.003	0.005
ZrO2	wtpc_oxide	97.921	0.495
HfO2	wtpc_oxide	1.795	0.171
C_MMC
Matrix	CaCO3
Description	Modern Marine Carbonate
Data Source	a bunch of shells from your local beach
URL	http://www.awebpageforthisstandardifappropriate.org
File Path	/Users/224742i/Documents/iolite/Reference materials/C_MMC.json
Notes	Any further notes about the standard can be entered here
Measurement	Units	Value	Uncertainty
87Sr_86Sr	ratio	0.709163	2e-05
C_JCp-1NP
Matrix	Glass
Description	carbonate reference nano-powdered pellets
Data Source	Jochum et al., 2019. Geostandards and GeoAnalytical Research 43(4)595-609
URL
File Path	/Users/224742i/Documents/iolite/Reference materials/C_JCp-1NP.json
Notes	"see above"
Measurement	Units	Value	Uncertainty
Al	ppm	379	44
B	ppm	48.5	3.6
Ba	ppm	9.21	0.49
Ca	ppm	400400	0
Ce	ppm	0.1	0.009
Co	ppm	0.314	0.024
Cr	ppm	0.629	0.063
Cs	ppm	0.02	0
Cu	ppm	0.78	0.216
Dy	ppm	0.0189	0.0017
Er	ppm	0.0155	0.0026
Eu	ppm	0.00546	0
Fe	ppm	67.2	7
Gd	ppm	0.021	0.0016
Hf	ppm	0.142	0.0038
Ho	ppm	0.00513	0.00113
La	ppm	0.0891	0.0061
Li	ppm	0.45	0
Lu	ppm	0.00345	0.00065
Mg	ppm	855	13
Mn	ppm	1.13	0.06
Na	ppm	4100	460
Nd	ppm	0.0711	0.0043
Ni	ppm	0.588	0.148
P	ppm	15.4	3.2
Pb	ppm	0.305	0.022
Pr	ppm	0.0174	0.0016
Rb	ppm	0.585	0.065
Si	ppm	3220	260
Sm	ppm	0.0168	0.0051
Sr	ppm	6890	330
Tb	ppm	0.0037	0.001
Th	ppm	0.0415	0.0054
Ti	ppm	4.57	0.89
Tm	ppm	0.00276	0.001
U	ppm	2.64	0.16
V	ppm	0.269	0.016
Y	ppm	0.33	0.016
Yb	ppm	0.0158	0.0036
Zn	ppm	2.2	0.2
Zr	ppm	5.12	1.47
87Sr/86Sr	ratio	0.70913	6e-05
84Sr/86Sr	ratio	0.05636	9e-05
C_JCt-1NP
Matrix	Glass
Description	carbonate reference nano-powdered pellets
Data Source	Jochum et al., 2019. Geostandards and GeoAnalytical Research 43(4)595-609
URL
File Path	/Users/224742i/Documents/iolite/Reference materials/C_JCt-1NP.json
Notes	"see above"
Measurement	Units	Value	Uncertainty
Al	ppm	200	20
B	ppm	23.1	1.4
Ba	ppm	5.5	0.35
Ca	ppm	400400	0
Ce	ppm	0.0541	0.0065
Co	ppm	0.091	0.0106
Cr	ppm	0.471	0.026
Cs	ppm	0.00925	0.00226
Cu	ppm	0.917	0.122
Dy	ppm	0.0067	0.0051
Er	ppm	0.0076	0
Eu	ppm	0.0031	0
Fe	ppm	61.5	7
Gd	ppm	0.0104	0
Hf	ppm	0.105	0.008
Ho	ppm	0.0023	0.0014
La	ppm	0.0324	0.0024
Li	ppm	0.36	0
Lu	ppm	0.0017	0.001
Mg	ppm	281	10
Mn	ppm	0.54	0.07
Na	ppm	3830	350
Nd	ppm	0.0287	0.0036
Ni	ppm	0.585	0
P	ppm	12.9	1.7
Pb	ppm	0.129	0.005
Pr	ppm	0.00769	0.00097
Rb	ppm	0.253	0.035
Si	ppm	3610	190
Sm	ppm	0.0063	0.0058
Sr	ppm	1410	50
Tb	ppm	0.0025	0
Th	ppm	0.0202	0.0023
Ti	ppm	3.68	1.79
Tm	ppm	0.0015	0
U	ppm	0.0646	0.0084
V	ppm	0.0744	0.0073
Y	ppm	0.0597	0.0024
Yb	ppm	0.006	0.0042
Zn	ppm	0	0
Zr	ppm	3.85	0.6
87Sr/86Sr	ratio	0.70914	8e-05
84Sr/86Sr	ratio	0.05635	0.0001
C_NanoSr
Matrix	Glass
Description	carbonate Sr isotope (and trace element) reference nano-powdered pellet
Data Source	Weber et al., 2020. Geostandards and GeoAnalytical Research 44(3),69-83
URL
File Path	/Users/224742i/Documents/iolite/Reference materials/C_NanoSr.json
Notes	"EPMA for Ca, Na and Fe. Solution and LA-ICPMS for rest. K and Mn below LOD for EPMA. TIMS and LA-IPMS for Sr isotope values"
Measurement	Units	Value	Uncertainty
Ba	ppm	0.18	0.05
Ca	ppm	376000	0
Dy	ppm	0.17	0.06
Er	ppm	0.01	0.01
Fe	ppm	122	127
Mg	ppm	2.9	0.6
Na	ppm	190	196
Rb	ppm	0.06	0.03
Sr	ppm	493.2	28
Yb	ppm	0.04	0.02
87Sr/86Sr	ratio	0.70756	3e-05
84Sr/86Sr	ratio	0.05648	3e-06
G_BCR2G
Matrix	Glass
Description	Natural glass, basaltic composition
Data Source	GeoRem database as of 2018-07-09
URL
File Path	/Users/224742i/Documents/iolite/Reference materials/G_BCR2G.json
Notes	GEOREM preferred values. Uncertainties for some major elements have not been included, otherwise 2 sd Values for isotope ratios come from various sources. Please review all values before using them.
Measurement	Units	Value	Uncertainty
Ag	ppm	0.5	0.4
Al	ppm	70913	0
Ba	ppm	683	7
Be	ppm	2.3	0.4
Bi	ppm	0.05	0.01
Ca	ppm	50429	0
Cd	ppm	0.2	0
Ce	ppm	53.3	0.5
Co	ppm	38	2
Cr	ppm	17	2
Cs	ppm	1.16	0.07
Cu	ppm	21	5
Dy	ppm	6.44	0.06
Er	ppm	3.7	0.04
Eu	ppm	1.97	0.02
Fe	ppm	96385	0
Ga	ppm	23	1
Gd	ppm	6.71	0.07
Ge	ppm	1.5	0.1
Hf	ppm	4.84	0.28
Ho	ppm	1.27	0.08
In	ppm	0.11	0.02
K	ppm	14900	150
La	ppm	24.7	0.3
Li	ppm	9	1
Lu	ppm	0.503	0.005
Mg	ppm	21467	0
Mn	ppm	1550	70
Mo	ppm	270	30
Na	ppm	23962	0
Nb	ppm	12.5	1
Nd	ppm	28.9	0.3
Ni	ppm	13	2
P	ppm	1615	0
Pb	ppm	11	1
Pr	ppm	6.7	0.4
Pt	ppm	0.78	0.6
Rb	ppm	47	0.5
Re	ppm	0.0062	0.0007
Sb	ppm	0.35	0.08
Sc	ppm	33	2
Si	ppm	254270	0
Sm	ppm	6.59	0.07
Sn	ppm	2.6	0.4
Sr	ppm	342	4
Ta	ppm	0.78	0.06
Tb	ppm	1.02	0.08
Th	ppm	5.9	0.3
Ti	ppm	14100	1000
Tl	ppm	0.3	0.1
Tm	ppm	0.51	0.04
U	ppm	1.69	0.12
V	ppm	425	18
W	ppm	0.5	0.07
Y	ppm	35	3
Yb	ppm	3.39	0.03
Zn	ppm	125	5
Zr	ppm	184	15
206Pb/204Pb	ppm	18.765	0
207Pb/204Pb	ppm	15.626	0
207Pb/206Pb	ppm	0.833	0
208Pb/204Pb	ppm	38.73	0
208Pb/206Pb	ppm	2.066	0
230Th/232Th	unknown	4.724e-06	0
[230Th/232Th]	ppm	0.877	0
234U/238U	unknown	5.493e-05	0
[234U/238U]	ppm	1.001	0
87Sr/86Sr	ppm	0.705003	0
d7Li	ppm	4.5	0.6
G_BHVO2G
Matrix	Glass
Description	Natural glass, basaltic composition
Data Source	GeoRem database as of 2018-07-09
URL
File Path	/Users/224742i/Documents/iolite/Reference materials/G_BHVO2G.json
Notes	GEOREM preferred values. Uncertainties for some major elements have not been included, otherwise 2 sd Values for isotope ratios come from various sources. Please review all values before using them.
Measurement	Units	Value	Uncertainty
Al	ppm	71971	0
Ba	ppm	131	2
Be	ppm	1.3	0.2
Bi	ppm	0.01	0.002
Ca	ppm	81430	0
Cd	ppm	0.1	0.02
Ce	ppm	37.6	0.2
Co	ppm	44	2
Cr	ppm	293	12
Cs	ppm	0.1	0.02
Cu	ppm	127	11
Dy	ppm	5.28	0.05
Er	ppm	2.56	0.02
Eu	ppm	2.07	0.01
Fe	ppm	87835	0
Ga	ppm	22	3
Gd	ppm	6.16	0.05
Ge	ppm	1.6	0.1
Hf	ppm	4.32	0.18
Ho	ppm	0.98	0.04
In	ppm	0.1	0.02
K	ppm	4270	50
La	ppm	15.2	0.2
Li	ppm	4.4	0.8
Lu	ppm	0.279	0.003
Mg	ppm	42994	0
Mn	ppm	1317	0
Mo	ppm	3.8	0.2
Na	ppm	17806	0
Nb	ppm	18.3	0.8
Nd	ppm	24.5	0.2
Ni	ppm	116	7
P	ppm	1266	0
Pb	ppm	1.7	0.2
Pr	ppm	5.35	0.22
Pt	ppm	0.46	0.09
Rb	ppm	9.2	0.04
Re	ppm	0.00047	0.00013
Sb	ppm	0.3	0.13
Sc	ppm	33	2
Si	ppm	230428	0
Sm	ppm	6.1	0.03
Sn	ppm	2.6	0.6
Sr	ppm	396	1
Ta	ppm	1.15	0.1
Tb	ppm	0.92	0.04
Th	ppm	1.22	0.05
Ti	ppm	16300	900
Tm	ppm	0.34	0.02
U	ppm	0.403	0.003
V	ppm	308	19
W	ppm	0.23	0.04
Y	ppm	26	2
Yb	ppm	2.01	0.02
Zn	ppm	102	6
Zr	ppm	170	7
206Pb/204Pb	ratio	18.733	0
207Pb/204Pb	ratio	15.571	0
208Pb/204Pb	ratio	38.27	0
87Sr/86Sr	ratio	0.703469	0
G_GSD1G
Matrix	Glass
Description	Synthetic Basalt Glass from USGS
Data Source	GeoRem database as of 2018-07-09
URL
File Path	/Users/224742i/Documents/iolite/Reference materials/G_GSD1G.json
Notes	GEOREM preferred values, as at 131014 Values for isotope ratios come from various sources. Please review all values before using them.
Measurement	Units	Value	Uncertainty
Ag	ppm	23	3
Al	ppm	70919.5	0
As	ppm	27	8
Au	ppm	4	0
B	ppm	50	20
Ba	ppm	67	1
Be	ppm	46	5
Bi	ppm	35	4
Ca	ppm	51458.4	0
Cd	ppm	18	4
Ce	ppm	41.4	0.4
Co	ppm	40	2
Cr	ppm	42	3
Cs	ppm	32	2
Cu	ppm	42	2
Dy	ppm	51.2	0.5
Er	ppm	40.1	0.4
Eu	ppm	41	2
Fe	ppm	103382	0
Ga	ppm	54	7
Gd	ppm	50.7	0.5
Ge	ppm	32	8
Hf	ppm	39	2
Ho	ppm	49	2
In	ppm	38	5
K	ppm	25300	300
La	ppm	39.1	0.4
Li	ppm	43	6
Lu	ppm	51.5	0.5
Mg	ppm	21711.6	0
Mn	ppm	220	20
Mo	ppm	39	3
Na	ppm	26707	0
Nb	ppm	42	3
Nd	ppm	44.7	0.5
Ni	ppm	58	4
P	ppm	860	160
Pb	ppm	50	2
Pr	ppm	45	1
Pt	ppm	6	0
Rb	ppm	37.3	0.4
Sb	ppm	43	7
Sc	ppm	52	2
Se	ppm	2	1
Si	ppm	248678	0
Sm	ppm	47.8	0.5
Sn	ppm	29	6
Sr	ppm	69.4	0.7
Ta	ppm	40	4
Tb	ppm	47	2
Th	ppm	41	2
Ti	ppm	7433.92	0
Tl	ppm	0.9	0.1
Tm	ppm	49	2
U	ppm	41	2
V	ppm	44	2
W	ppm	43	4
Y	ppm	42	2
Yb	ppm	50.9	0.5
Zn	ppm	54	2
Zr	ppm	42	2
143Nd/144Nd	ratio	0.511521	0
176Hf/177Hf	ratio	0.282121	0
206Pb/204Pb	ratio	19.579	0
207Pb/204Pb	ratio	15.745	0
207Pb/206Pb	ratio	0.80418	0
208Pb/204Pb	ratio	38.908	0
208Pb/206Pb	ratio	1.9871	0
234U/238U	ratio	1.798	0
238U/235U	ratio	271.4	0
87Sr/86Sr	ratio	0.709416	0
d11B	ratio	10.1	0
d29Si	ratio	-0.12	0
d30Si	ratio	-0.21	0
d44/40Ca	ratio	0.86	0
d7Li	ratio	30.9	1
G_IMER-1
Matrix	Glass
Description	IMER-1 glass for sulphide and iron oxide analysis
Data Source	Ding et al, 2011 Min.Mag. 75(2), 279-287.
URL
File Path	/Users/224742i/Documents/iolite/Reference materials/G_IMER-1.json
Notes
Measurement	Units	Value	Uncertainty
As	ppm	0.89	0.061
Ag	ppm	0.22	0.017
Au	ppm	0.42	0.03
Ba	ppm	31.68	1.71
Bi	ppm	0.49	0.031
Cd	ppm	0.37	0.081
Co	ppm	0.21	0.025
Cr	ppm	0.51	0.086
Cu	ppm	4702	138
Fe	ppm	3100	71.3
Ga	ppm	112.98	3.06
Ge	ppm	365500	2485
Hg	ppm	0.23	0.05
In	ppm	0.17	0.016
Mn	ppm	4.2	0.32
Mo	ppm	0.2	0.04
Na	ppm	787	0
Ni	ppm	0.32	0.043
Pb	ppm	0.58	0.03
S	ppm	356600	2781
Sb	ppm	269200	2234
Se	ppm	1.58	0.28
Sr	ppm	0.38	0.09
Te	ppm	0.3	0.07
Tl	ppm	0.21	0.014
W	ppm	0.08	0.016
V	ppm	0.29	0.025
Zn	ppm	4014	102
G_NIST610
Matrix	Glass
Description	NIST 610 glass
Data Source	GeoRem database as of 2018-07-09
URL
File Path	/Users/224742i/Documents/iolite/Reference materials/G_NIST610.json
Notes	GEOREM preferred values, as at 050509. Uncertainties for some major elements have not been included Values for isotope ratios come from various sources. Please review all values before using them.
Measurement	Units	Value	Uncertainty
Ag	ppm	251	9
Al	ppm	10797	0
As	ppm	325	18
Au	ppm	23.6	1.7
B	ppm	350	56
Ba	ppm	452	9
Be	ppm	476	31
Bi	ppm	384	26
Ca	ppm	82144	0
Cd	ppm	270	16
Ce	ppm	453	8
Cl	ppm	274	67
Co	ppm	410	10
Cr	ppm	408	10
Cs	ppm	366	9
Cu	ppm	441	15
Dy	ppm	437	11
Er	ppm	455	14
Eu	ppm	447	12
F	ppm	304	0
Fe	ppm	458	9
Ga	ppm	433	13
Gd	ppm	449	12
Ge	ppm	447	78
Hf	ppm	435	12
Ho	ppm	449	12
In	ppm	434	19
K	ppm	464	21
La	ppm	440	10
Li	ppm	468	24
Lu	ppm	439	8
Mg	ppm	432	29
Mn	ppm	444	13
Mo	ppm	417	21
Na	ppm	99415	0
Nb	ppm	465	34
Nd	ppm	430	8
Ni	ppm	458.7	4
P	ppm	413	46
Pb	ppm	426	1
Pd	ppm	1.21	0.44
Pr	ppm	448	7
Pt	ppm	3.12	0.08
Rb	ppm	425.7	1
Re	ppm	49.9	3.7
Rh	ppm	1.29	0.07
S	ppm	575	32
Sb	ppm	396	19
Sc	ppm	455	10
Se	ppm	138	42
Si	ppm	327180	0
Sm	ppm	453	11
Sn	ppm	430	29
Sr	ppm	515.5	1
Ta	ppm	446	33
Te	ppm	302	0
Tb	ppm	437	9
Th	ppm	457.2	1
Ti	ppm	452	10
Tl	ppm	59.6	2.8
Tm	ppm	435	10
U	ppm	461.5	1
V	ppm	450	9
W	ppm	444	29
Y	ppm	462	11
Yb	ppm	450	9
Zn	ppm	460	18
Zr	ppm	448	9
Zr	ppm	448	9
11B/10B	ratio	4.049	0
143Nd/144Nd	ratio	0.511927	0
206Pb/204Pb	ratio	17.045	0
207Pb/204Pb	ratio	15.504	0
207Pb/206Pb	ratio	0.9096	0
208Pb/204Pb	ratio	36.964	0
208Pb/206Pb	ratio	2.168	0
87Sr/86Sr	ratio	0.709699	0
d7Li	ratio	32.5	0
G_NIST612
Matrix	Glass
Description	NIST 612 glass, nominal 40 ppm for many elements
Data Source	GeoRem database as of 2018-07-09
URL
File Path	/Users/224742i/Documents/iolite/Reference materials/G_NIST612.json
Notes	These are the preferred values of NIST 612 from GEOREM. All uncertainties are 95%CL or 2 SD. Uncertainties for some major elements have not been included. Values for isotope ratios come from various sources. Please review all values before using them.
Measurement	Units	Value	Uncertainty
Ag	ppm	22	0.3
Al	ppm	11167	0
As	ppm	35.7	5.5
Au	ppm	4.77	0.31
B	ppm	34.3	1.7
Ba	ppm	39.3	0.9
Be	ppm	37.5	1.5
Bi	ppm	30.2	2.3
Ca	ppm	85002	0
Cd	ppm	28.1	1.1
Ce	ppm	38.4	0.7
Cl	ppm	142	58
Co	ppm	35.5	1
Cr	ppm	36.4	1.5
Cs	ppm	42.7	1.8
Cu	ppm	37.8	1.5
Dy	ppm	35.5	0.7
Er	ppm	38	0.9
Eu	ppm	35.6	0.8
F	ppm	80	89
Fe	ppm	51	2
Ga	ppm	36.9	1.5
Gd	ppm	37.3	0.9
Ge	ppm	36.1	3.8
Hf	ppm	36.7	1.2
Ho	ppm	38.3	0.8
In	ppm	38.9	2.1
K	ppm	62.3	2.4
La	ppm	36	0.7
Li	ppm	40.2	1.3
Lu	ppm	37	0.9
Mg	ppm	68	5.1
Mn	ppm	38.7	0.9
Mo	ppm	37.4	1.5
Na	ppm	103858	0
Nb	ppm	38.9	2.1
Nd	ppm	35.5	0.7
Ni	ppm	38.8	0.2
P	ppm	46.6	6.9
Pb	ppm	38.57	0.2
Pd	ppm	1.05	0.1
Pr	ppm	37.9	1
Pt	ppm	2.51	0.1
Rb	ppm	31.4	0.4
Re	ppm	6.63	0.61
Rh	ppm	0.91	0.02
S	ppm	377	70
Sb	ppm	34.7	1.8
Sc	ppm	39.9	2.5
Si	ppm	336061	0
Sm	ppm	37.7	0.8
Sn	ppm	38.6	1.3
Sr	ppm	78.4	0.2
Ta	ppm	37.6	1.9
Tb	ppm	37.6	1.1
Th	ppm	37.79	0.08
Ti	ppm	44	2.3
Tl	ppm	14.9	0.5
Tm	ppm	36.8	0.6
U	ppm	37.38	0.08
V	ppm	38.8	1.2
W	ppm	38	1.1
Y	ppm	38.3	1.4
Yb	ppm	39.2	0.9
Zn	ppm	39.1	1.7
Zr	ppm	37.9	1.2
11B/10B	ratio	4.048	0
143Nd/144Nd	ratio	0.51193	0
206Pb/204Pb	ratio	17.095	0
207Pb/204Pb	ratio	15.511	0
207Pb/206Pb	ratio	0.9073	0
208Pb/204Pb	ratio	37.005	0
208Pb/206Pb	ratio	2.1647	0
87Sr/86Sr	ratio	0.709063	0
d7Li	ratio	31.2	0
G_NIST614
Matrix	Glass
Description	NIST 612 glass
Data Source	GeoRem database as of April-2009
URL
File Path	/Users/224742i/Documents/iolite/Reference materials/G_NIST614.json
Notes	These are the preferred values of NIST 614 from GEOREM. All uncertainties are 95%CL or 2 SD. Prepared by D.Savard (UQAC)
Measurement	Units	Value	Uncertainty
Ag	ppm	0.42	0.04
Al	ppm	10532	159
As	ppm	0.74	0.23
Au	ppm	0.48	0.07
B	ppm	1.49	0.19
Ba	ppm	3.2	0.09
Be	ppm	0.753	0.015
Bi	ppm	0.581	0.043
Ca	ppm	85001	1429
Cd	ppm	0.56	0.05
Ce	ppm	0.813	0.025
Cl	ppm	102	84
Co	ppm	0.79	0.09
Cr	ppm	1.19	0.12
Cs	ppm	0.664	0.034
Cu	ppm	1.37	0.07
Dy	ppm	0.746	0.022
Er	ppm	0.74	0.017
Eu	ppm	0.77	0.016
F	ppm	6.2	0
Fe	ppm	18.8	6
Ga	ppm	1.31	0.09
Gd	ppm	0.763	0.021
Ge	ppm	0.942	0.096
Hf	ppm	0.711	0.022
Ho	ppm	0.749	0.015
In	ppm	0.79	0.05
Ir	ppm	0.002	0
K	ppm	30	1
La	ppm	0.72	0.013
Li	ppm	1.6	0.09
Lu	ppm	0.732	0.018
Mg	ppm	33.8	1.9
Mn	ppm	1.42	0.07
Mo	ppm	0.8	0.03
Na	ppm	101635	2226
Nb	ppm	0.824	0.03
Nd	ppm	0.752	0.014
Ni	ppm	1.1	0.1
P	ppm	11.4	3.9
Pb	ppm	2.32	0.04
Pd	ppm	2.05	0.1
Pr	ppm	0.768	0.015
Pt	ppm	2.36	0.12
Rb	ppm	0.855	0.005
Re	ppm	0.17	0.008
Rh	ppm	1.54	0.18
S	ppm	291	66
Sb	ppm	0.79	0.064
Sc	ppm	0.74	0
Se	ppm	0.4	0.08
Si	ppm	337930	2337
Sm	ppm	0.754	0.013
Sn	ppm	1.68	0.15
Sr	ppm	45.8	0.1
Ta	ppm	0.808	0.026
Tb	ppm	0.739	0.02
Th	ppm	0.748	0.006
Ti	ppm	3.61	0.25
Tl	ppm	0.273	0.02
Tm	ppm	0.732	0.02
U	ppm	0.823	0.002
V	ppm	1.01	0.04
W	ppm	0.806	0.071
Y	ppm	0.79	0.032
Yb	ppm	0.777	0.021
Zn	ppm	2.79	0.38
Zr	ppm	0.848	0.028
11B/10B	ratio	4.052	0.001
143Nd/144Nd	ratio	0.51192	3e-06
206Pb/204Pb	ratio	17.838	0.006
207Pb/204Pb	ratio	15.537	0.006
207Pb/206Pb	ratio	0.8704	0.0009
208Pb/204Pb	ratio	37.486	0.019
208Pb/206Pb	ratio	2.0995	0.0031
87Sr/86Sr	ratio	0.708363	1.1e-05
d7Li	ratio	20.5	0.05
G_TiG
Matrix	Glass
Description	MPI-DING basalt glass
Data Source	GeoRem database
URL
File Path	/Users/224742i/Documents/iolite/Reference materials/G_TiG.json
Notes	'Natural glass"
Measurement	Units	Value	Uncertainty
Ag	ppm	0.1	0
Al	ppm	90502	0
As	ppm	0.96	0.44
Au	ppm	0.1	0.11
B	ppm	4.1	1.1
Ba	ppm	388	12
Be	ppm	2	0.6
Bi	ppm	0.1	0.05
Br	ppm	0.3	0
Ca	ppm	50744	643
Cd	ppm	0.2	0
Ce	ppm	127	4
Cl	ppm	113	37
Co	ppm	18.9	0.8
Cr	ppm	20.9	2
Cs	ppm	2.69	0.19
Cu	ppm	18.8	2
Dy	ppm	4.5	0.12
Er	ppm	2.49	0.08
Eu	ppm	1.21	0.04
F	ppm	321	0
Fe	ppm	50059	466
Ga	ppm	19.4	0.9
Gd	ppm	5.31	0.29
Ge	ppm	1.8	1.5
Hf	ppm	3.88	0.15
Ho	ppm	0.86	0.031
In	ppm	0.3	0.4
Ir	ppm	0.2	0
K	ppm	1627	0
La	ppm	70.4	2.4
Li	ppm	19.9	0.9
Lu	ppm	0.354	0.012
Mg	ppm	22616	0
Mn	ppm	984	0
Mo	ppm	4.2	1.8
Na	ppm	23220	668
Nb	ppm	8.87	0.43
Nd	ppm	41.4	1.2
Ni	ppm	10.6	1.3
P	ppm	733	0
Pb	ppm	11.6	1.5
Pr	ppm	12.4	0.1
Pt	ppm	16	0
Rb	ppm	8.7	0.4
Re	ppm	0.0018	0.002
S	ppm	2.6	0.05
Sb	ppm	0.25	0.03
Sc	ppm	26.9	1.1
Se	ppm	0.05	0
Si	ppm	273920	1870
Sm	ppm	6.57	0.14
Sn	ppm	2	0.5
Sr	ppm	284	6
Ta	ppm	0.464	0.021
Tb	ppm	0.773	0.029
Th	ppm	31.3	1
Ti	ppm	4526	10.2
Tm	ppm	0.354	0.015
U	ppm	1.71	0.1
V	ppm	190	11
W	ppm	0.69	0.12
Y	ppm	23.9	0.8
Yb	ppm	2.38	0.08
Zn	ppm	74	10
Zr	ppm	144	4
206Pb/204Pb	ratio	18.731	0.006
207Pb/204Pb	ratio	15.678	0.023
207Pb/206Pb	ratio	0.8374	0.00072
208Pb/204Pb	ratio	38.977	0.012
208Pb/206Pb	ratio	2.0811	0.0002
87Sr/86Sr	ratio	0.710137	0
143Nd/144Nd	ratio	0.512333	0
S_Po726
Matrix	Glass
Description	"synthetic pyrrhotite doped with six PGE and Au"
Data Source	Paul Sylvester, Memorial University
URL
File Path	/Users/224742i/Documents/iolite/Reference materials/S_Po726.json
Notes	"See material supplied by Paul Sylvester with sample."
Measurement	Units	Value	Uncertainty
Au	ppm	46.1	2.2
Ru	ppm	36.7	0.3
Rh	ppm	40.3	0.1
Pd	ppm	44.3	0.4
Os	ppm	42.4	1.4
Ir	ppm	43.1	0.3
Pt	ppm	36.8	0.3
Fe	ppm	613600	2100
S	ppm	389700	1900
GSE-1g-A
Matrix	Glass (GSE-1g)
Description	GSE-1g glass
Data Source	GeoRem database as of fev11
URL
File Path	/Users/224742i/Documents/iolite/Reference materials/GSE-1g-A.json
Notes	"GEOREM preferred values [http://georem.mpch-mainz.gwdg.de/], as at FEB 20, 2011. Prepared by: DANY SAVARD, UQAC, Quebec, Canada. If you modify this file, please change the ""A"" of ""GSE-1g-A"" for another letter. Compilation prepared for IOLITE users [http://iolite.earthsci.unimelb.edu.au/forum/]."
Measurement	Units	Value	Uncertainty
Ag	ppm	200	20
Al	ppm	68804	2117
As	ppm	260	90
Au	ppm	7	0
B	ppm	330	120
Ba	ppm	427	5
Be	ppm	490	80
Bi	ppm	320	30
Ca	ppm	52858	2143
Cd	ppm	160	50
Ce	ppm	414	4
Co	ppm	380	20
Cr	ppm	400	80
Cs	ppm	310	20
Cu	ppm	380	40
Dy	ppm	524	6
Er	ppm	595	6
Eu	ppm	410	20
Fe	ppm	98717	2332
Ga	ppm	490	70
Gd	ppm	514	6
Ge	ppm	320	80
Hf	ppm	395	7
Ho	ppm	501	8
In	ppm	370	60
Ir	ppm	120	0
K	ppm	21800	200
La	ppm	392	4
Li	ppm	430	60
Lu	ppm	518	6
Mg	ppm	21106	181
Mn	ppm	590	20
Mo	ppm	390	30
Na	ppm	28934	1484
Nb	ppm	420	40
Nd	ppm	453	5
Ni	ppm	440	30
P	ppm	70	20
Pb	ppm	378	12
Pr	ppm	460	10
Pt	ppm	30	0
Rb	ppm	356	4
Re	ppm	120	0
Sb	ppm	450	110
Sc	ppm	530	20
Se	ppm	20	16
Si	ppm	250994	7011
Sm	ppm	488	5
Sn	ppm	280	50
Sr	ppm	447	5
Ta	ppm	390	40
Tb	ppm	480	20
Th	ppm	380	20
Ti	ppm	450	42
Tl	ppm	2	0
Tm	ppm	500	20
U	ppm	420	30
V	ppm	440	20
W	ppm	430	50
Y	ppm	410	30
Yb	ppm	520	5
Zn	ppm	460	10
Zr	ppm	410	30
S_STDGL3_35
Matrix	Glass (Li-tetraborate, Na-nitrate, Li-nitrate glass with RTS-4 and CZN-3 sulphide minerals in a ratio of 2.5:1, doped with trace elements)
Description	glass standard for sulphide analysis with Fe as internal reference
Data Source	Leonid Danyushevsky-values sent with standard
URL
File Path	/Users/224742i/Documents/iolite/Reference materials/S_STDGL3_35.json
Notes	“Use Fe as internal reference, use 47Ti due to ArLi interference, use 65Cu due to FeLi and ArNa interference on 63Cu, measure 72Ge, 73Ge and 74Ge to gauge the effect of ArS interferences. Measure Pt, Au and Ag at least 10 times during the analytical session with spots spread over the surface of the standard as there is micro-scale heterogeneity in these elements.”
Measurement	Units	Value	Uncertainty
Ag	ppm	104	2.9
Al	ppm	116	1.9
As	ppm	347	4.5
Au	ppm	17.3	0.7
Bi	ppm	19	0.3
Cd	ppm	521	10.4
Co	ppm	75	0.9
Cu	ppm	367	7.7
Fe	ppm	17260	258.9
Gd	ppm	80	1.8
Ge	ppm	171	2.9
Hf	ppm	36	0.8
In	ppm	102	1.2
Mg	ppm	58	1.5
Mn	ppm	213	2.1
Mo	ppm	168	2.5
Na	ppm	52790	369.5
Ni	ppm	247	3.7
Pb	ppm	60	0.8
Pt	ppm	13.4	0.5
Re	ppm	15.2	0.4
Sb	ppm	91	1.2
S	ppm	11728	222.8
Se	ppm	2945	109
Sn	ppm	189	2.3
Sr	ppm	28	0.5
Ta	ppm	16.3	0.3
Te	ppm	1256	25.1
Th	ppm	13.6	0.3
Ti	ppm	253	7.8
Tl	ppm	166	3.5
U	ppm	13.9	0.3
W	ppm	78	1.2
Zn	ppm	5811	52.3
Zr	ppm	44	0.9
MZ_44069new
Matrix	Monazite
Description	"44069 Monazite, natural standard"
Data Source	Aleinikoff Condon Kamo Cottle
URL
File Path	/Users/224742i/Documents/iolite/Reference materials/MZ_44069new.json
Notes	All errors are 0.1% expressed as 2se, 207Pb/235U calculated from 207/206 and 206/238, Age calculated from 206Pb/238U. HREE are estimated, trace elements from Holder et al., 2015 supplementary data. if error in Holder et al., 2015 supplementary data was bigger than average, 100% uncertainty assumed.Some elemental values replaced with EMPA values determined in Adelaide for Rich Taylor
Measurement	Units	Value	Uncertainty
Age	Ma	424	0
206Pb/238U	ratio	0.068	0.000136
207Pb/235U	ratio	0.5184	0.0010368
208Pb/232Th	ratio	0.0212	4.24e-05
207Pb/206Pb	ratio	0.055293	0.000110586
206Pb/208Pb	ratio	0.01	0
206Pb/204Pb	ratio	0.000124	0
207Pb/204Pb	ratio	0.01	0
208Pb/204Pb	ratio	0.01	0
Si	ppm	622	236
Pb	ppm	754	250
Th	ppm	24977	5474
U	ppm	3251	943
Y	ppm	19225	2635
La	ppm	107314	1892
Ce	ppm	233101	4845
Pr	ppm	26759	797
Nd	ppm	110661	2927
Sm	ppm	19056	582
Eu	ppm	2121	2121
Gd	ppm	16950	949
Tb	ppm	1649	1649
Dy	ppm	7281	6909
Ho	ppm	529	529
Er	ppm	1400	1400
Tm	ppm	72	9
Yb	ppm	272	33
Lu	ppm	21	3
Ca	ppm	5469	1146
P	ppm	140335	1433
Sr	ppm	43	7
Si	ppm	623	236
F	ppm	2754	716
Cl	ppm	419	121
O	ppm	280317	1891
MZ_MHManagotry
Matrix	Monazite
Description	"Managotry Monazite, natural standard"
Data Source	This was Matt Horstwood's standard file. Gasquet & Poitrasson 2010 for concentrations; Palin et al 2013 for ID-TIMS isotope ratios (3 of 4). Emily Peterman for 7/35 and 8/32
URL
File Path	/Users/224742i/Documents/iolite/Reference materials/MZ_MHManagotry.json
Notes	All errors are 0.1% expressed as 2se, 207Pb/235U calculated from 207/206 and 206/238, Age calculated from 206Pb/238U
Measurement	Units	Value	Uncertainty
Age	Ma	555	0
Pb	ppm	2785	0
Th	ppm	117937	0
U	ppm	1322	0
206Pb/238U	ratio	0.09028	0
207Pb/235U	ratio	0.74749	0
208Pb/232Th	ratio	0.02844	0
207Pb/206Pb	ratio	0.059772	0.00012052
206Pb/208Pb	ratio	0.01	0
206Pb/204Pb	ratio	0.01	0
207Pb/204Pb	ratio	0.01	0
208Pb/204Pb	ratio	0.01	0
MZ_Managotry
Matrix	Monazite
Description	"Managotry Monazite, natural standard"
Data Source	Emily Peterman.
URL
File Path	/Users/224742i/Documents/iolite/Reference materials/MZ_Managotry.json
Notes	All errors are 0.1% expressed as 2se, 207Pb/235U calculated from 207/206 and 206/238, Age calculated from 206Pb/238U
Measurement	Units	Value	Uncertainty
Age	Ma	555	0
Pb	ppm	1987	0
Th	ppm	74884	0
U	ppm	905	0
206Pb/238U	ratio	0.089965	0.00017993
207Pb/235U	ratio	0.74749	0.00149498
208Pb/232Th	ratio	0.02844	5.6875e-05
207Pb/206Pb	ratio	0.06026	0.00012052
206Pb/208Pb	ratio	0.01	0
206Pb/204Pb	ratio	0.01	0
207Pb/204Pb	ratio	0.01	0
208Pb/204Pb	ratio	0.01	0
MZ_Stern
Matrix	Monazite
Description	"Stern Monazite, natural standard"
Data Source	Richard Stern. UCSB EPMA data
URL
File Path	/Users/224742i/Documents/iolite/Reference materials/MZ_Stern.json
Notes	Sm, Eu, Ho thru Lu are calculated based on probe data and ICP correction for other REEs
Measurement	Units	Value	Uncertainty
Age	ratio	0	512
206Pb/238U	ratio	0.082721	5e-06
207Pb/235U	ratio	0.656594	1e-05
208Pb/232Th	ratio	0.025655	5e-06
207Pb/206Pb	ratio	0.057568	1e-06
206Pb/208Pb	ratio	0.01	0
206Pb/204Pb	ratio	0.01	0
207Pb/204Pb	ratio	0.01	0
208Pb/204Pb	ratio	0.01	0
Si	ppm	3935	472
Pb	ppm	1742	209
Th	ppm	55288	6635
U	ppm	3791	455
Y	ppm	14167	1700
La	ppm	46425	5571
Ce	ppm	113700	13644
Pr	ppm	14411	1729
Nd	ppm	49919	5990
Sm	ppm	16303	1956
Eu	ppm	38	5
Gd	ppm	10636	1276
Tb	ppm	1113	134
Dy	ppm	2500	300
Ho	ppm	174	21
Er	ppm	177	21
Tm	ppm	13	2
Yb	ppm	47	6
Lu	ppm	3	0
Fe	ppm	24	3
Ca	ppm	6462	775
P	ppm	126796	15216
Sr	ppm	1	0.2
MZ_Trebilcock
Matrix	Monazite
Description	“Trebilcock Monazite, natural standard, Harvard Mineralogical Museum Standard 117531“
Data Source	Harvard.
URL
File Path	/Users/224742i/Documents/iolite/Reference materials/MZ_Trebilcock.json
Notes	Tomasack et al., 1996. J of Geology 104(2), 185-195, TU-1B. Trace elements and Sm/Nd from McFarlane and McCulloch, 2007 Chemical Geology 245, 45-60
Measurement	Units	Value	Uncertainty
Age	Ma	272	2
Pb	ppm	2000	0
Th	ppm	0	0
U	ppm	6333	0
Be	ppm	0.06	0.06
As	ppm	311	27
Rb	ppm	2.02	0.09
Sr	ppm	2.3	0.68
Y	ppm	21130	148
Ba	ppm	0.16	0.05
La	ppm	63146	5833
Ce	ppm	154722	14207
Pr	ppm	20893	1874
Nd	ppm	87868	7925
Sm	ppm	32559	2341
Eu	ppm	157	8
Gd	ppm	21011	1054
Tb	ppm	2649	88
Dy	ppm	8726	172
Ho	ppm	800	6
Er	ppm	1090	18
Tm	ppm	93	3
Yb	ppm	395	14
Lu	ppm	28	1
206Pb/238U	ratio	0.04421	0.00017993
207Pb/235U	ratio	0.3068	0.00149498
208Pb/232Th	ratio	0	0
207Pb/206Pb	ratio	0.05032	0.00012052
206Pb/208Pb	ratio	0.141282	0
206Pb/204Pb	ratio	8908	0
207Pb/204Pb	ratio	500	0
208Pb/204Pb	ratio	0	0
147Sm/144Nd	ratio	0.234	0.005
MASS1-Good
Matrix	Pressed pellet (Fe-S-Zn)
Description	PS-1 / MASS-1 prepared by USGS (2002)
Data Source	Wilson et al. (2002) in JAAS & S.-J. Barnes (UQAC) working values from compilation (April 2011)
URL
File Path	/Users/224742i/Documents/iolite/Reference materials/MASS1-Good.json
Notes	Other elements present but not analysed by Wilson are estimated at UQAC using LA-ICP-MS (NIST612 and Laflamme)
Measurement	Units	Value	Uncertainty
Ag	ppm	50	5
As	ppm	65	3
Au	ppm	47	0
Ba	ppm	14	5
Bi	ppm	60	1
Cd	ppm	70	0
Co	ppm	60	10
Cr	ppm	65	11
Cu	ppm	134000	500
Fe	ppm	156000	1000
Ga	ppm	64	11
Ge	ppm	50	0
Hg	ppm	57	3
In	ppm	50	0
Ir	ppm	94.6	9.95
Mn	ppm	280	80
Mo	ppm	59	9
Na	ppm	25080	20
Ni	ppm	97	15
Pb	ppm	68	7
Pt	ppm	51.9	0
S	ppm	276000	1000
Sb	ppm	60	9
Se	ppm	51	4
Sn	ppm	59	6
Te	ppm	15	0
Tl	ppm	50	0
V	ppm	63	10
W	ppm	20	2
Zn	ppm	210000	5000
Xz	ppm	50	0
Xb	ppm	50	0
R_R10
Matrix	Rutile
Description	"Rutile, Gjerstad, Southern Norway"
Data Source	"Luvizotto et al., Chem Geol., 261, 2009, 346-69"
URL
File Path	/Users/224742i/Documents/iolite/Reference materials/R_R10.json
Notes
Measurement	Units	Value	Uncertainty
Age	Ma	1090	0
206Pb/238U	ratio	0.18452	0.00065
207Pb/235U	ratio	1.9286	0.0105
208Pb/232Th	ratio	0	0
207Pb/206Pb	ratio	0.075804	0.000187
206Pb/208Pb	ratio	0	0
206Pb/204Pb	ratio	0	0
207Pb/204Pb	ratio	0	0
208Pb/204Pb	ratio	0	0
Pb	ppm	0.081	0
Th	ppm	0	0
U	ppm	44.1	1.2
V	ppm	1279	53
Zr	ppm	759	8
Nb	ppm	2845	38
Mo	ppm	11.2	0.09
Sb	ppm	2.08	0.1
Hf	ppm	37.2	0.2
Ta	ppm	384	19
W	ppm	61	3.6
Ti	ppm	599510	0
R_R10_trace
Matrix	Rutile
Description	"Rutile, Gjerstad, Southern Norway"
Data Source	"Luvizotto et al., Chem Geol., 261, 2009, 346-69"
URL
File Path	/Users/224742i/Documents/iolite/Reference materials/R_R10_trace.json
Notes
Measurement	Units	Value	Uncertainty
Age	Ma	1090	0
Hf	ppm	37.2	0.2
Mo	ppm	11.2	0.09
Nb	ppm	2845	38
Pb	ppm	0.081	0
Sb	ppm	2.08	0.1
Ta	ppm	384	19
Th	ppm	0	0
Ti	ppm	599510	0
U	ppm	44.1	1.2
V	ppm	1279	53
W	ppm	61	3.6
Zr	ppm	759	8
206Pb/238U	ratio	0.18452	0.00065
207Pb/235U	ratio	1.9286	0.0105
208Pb/232Th	ratio	0	0
207Pb/206Pb	ratio	0	0
206Pb/208Pb	ratio	0	0
206Pb/204Pb	ratio	0	0
207Pb/204Pb	ratio	0	0
208Pb/204Pb	ratio	0	0
R_R19
Matrix	Rutile
Description	"Rutile, Blumberg, Adelaide"
Data Source	"Zack et al., 2011 Contrib. Min. Pet 162, 515-30"
URL
File Path	/Users/224742i/Documents/iolite/Reference materials/R_R19.json
Notes
Measurement	Units	Value	Uncertainty
Age	Ma	490	0
206Pb/238U	ratio	0.07887	0.00054
207Pb/235U	ratio	0.6186	0.0056
208Pb/232Th	ratio	0	0
207Pb/206Pb	ratio	0.05688	0.00014
206Pb/208Pb	ratio	0	0
206Pb/204Pb	ratio	0	0
207Pb/204Pb	ratio	0	0
208Pb/204Pb	ratio	38.08	0
Pb	ppm	0	0
Th	ppm	0	0
U	ppm	10	5
R_Wodgina
Matrix	Rutile
Description	"Rutile, Wodgina, Italy"
Data Source	“Tanya Ewing’s PhD thesis from ANU, 2011”
URL
File Path	/Users/224742i/Documents/iolite/Reference materials/R_Wodgina.json
Notes
Measurement	Units	Value	Uncertainty
Age	Ma	2845	0
206Pb/238U	ratio	0.5598	0.00588
207Pb/235U	ratio	0	0
208Pb/232Th	ratio	0	0
207Pb/206Pb	ratio	0.20234	0.0002
206Pb/208Pb	ratio	0	0
206Pb/204Pb	ratio	1644	0
207Pb/204Pb	ratio	0	0
208Pb/204Pb	ratio	0	0
Pb	ppm	0	0
Th	ppm	0	0
U	ppm	10	5
Z_91500
Matrix	Zircon
Description	91500 Zircon, natural standard
Data Source	Wiedenbeck et al. 95, Geostandards Newsletter 19, 1-23, plus GEOREM database as of Dec09, and Woodhead & Hergt, 2005 Geostandards 29, 183-195 for Hf data
URL
File Path	/Users/224742i/Documents/iolite/Reference materials/Z_91500.json
Notes	204-based ratios are approximate, 207/235 value here calculated from 238/235 natural, not as reported in Wiedenbeck et al!
Measurement	Units	Value	Uncertainty
Age	Ma	1065	0
Ba	ppm	0.06	0
Ce	ppm	2.6	0
Cr	ppm	1.5	0
Dy	ppm	12	0
Er	ppm	25	0
Eu	ppm	0.24	0
Gd	ppm	2.2	0
Hf	ppm	5900	0
Ho	ppm	4.8	0
La	ppm	0.006	0
Lu	ppm	13	0
Nb	ppm	0.79	0
Nd	ppm	0.24	0
Ni	ppm	0.07	0
P	ppm	24	0
Pb	ppm	15	0
Pr	ppm	0.024	0
Si	ppm	152840	0
Sm	ppm	1	0
Sr	ppm	0.052	0
Ta	ppm	1	0
Tb	ppm	0.86	0
Th	ppm	30	0
Tl	ppm	6	0
Tm	ppm	6.9	0
U	ppm	80	0
Y	ppm	140	0
Yb	ppm	74	0
176Hf/177Hf	ratio	0.282306	0
206Pb/238U	ratio	0.17917	0
207Pb/235U	ratio	1.84983	0
208Pb/232Th	ratio	0.05374	0
207Pb/206Pb	ratio	0.07488	0
207Pb/206Pb(i)	ratio	0.9142	0
206Pb/208Pb	ratio	9.35454	0
206Pb/204Pb	ratio	10000	0
207Pb/204Pb	ratio	749	0
208Pb/204Pb	ratio	1069	0
Z_91500_Schoene
Matrix	Zircon
Description	"91500 Zircon, natural standard"
Data Source	"Geochron ratios and age from Schoene et al., 2006, GCA 70, 426-445 with 207/204, 208/232 and 206/208 ratios from Wiedenbeck et al., 1995, Geostandards Newsletter 19, 1-23; weighted mean values calculated in isoplotr from Table 1 in Schoene; traces from GEOREM database with 1 sigma uncertainty updated Feb 2022 and Hf ratios from Woodhead & Hergt, 2005 Geostandards 29, 183-195"
URL
File Path	/Users/224742i/Documents/iolite/Reference materials/Z_91500_Schoene.json
Notes	"204-based ratios are approximate, errors are 2sigma on ratios from Schoene"
Measurement	Units	Value	Uncertainty
Age	Ma	1063.6	0
Ba	ppm	0.06	0.03
Ce	ppm	2.6	0.3
Cr	ppm	1.5	0.3
Dy	ppm	12	1
Er	ppm	25	3
Eu	ppm	0.24	0.03
Gd	ppm	2.2	0.3
Hf	ppm	5900	300
Ho	ppm	4.8	0.4
La	ppm	0.006	0.003
Lu	ppm	13	1
Nb	ppm	0.79	0.07
Nd	ppm	0.24	0.04
Ni	ppm	0.07	0.01
P	ppm	24	1
Pb	ppm	15	2
Pr	ppm	0.024	0.015
Si	ppm	152840	0
Sm	ppm	0.5	0.08
Sr	ppm	0.052	0.004
Ta	ppm	0.5	0.1
Tb	ppm	0.86	0.07
Th	ppm	30	3
Tl	ppm	6	2
Tm	ppm	6.9	0.4
U	ppm	80	8
Y	ppm	140	14
Yb	ppm	74	4
176Hf/177Hf	ratio	0.282306	8e-06
176Lu/177Hf	ratio	0.000311	0
206Pb/238U	ratio	0.179373	0.0002
207Pb/235U	ratio	1.85292	0.0005
208Pb/232Th	ratio	0.05374	0.00015
207Pb/206Pb	ratio	0.074923	1e-05
206Pb/208Pb	ratio	9.35454	0
206Pb/204Pb	ratio	44145	0
207Pb/204Pb	ratio	749	0
208Pb/206Pb	ratio	0.107	0
Z_FC1
Matrix	Zircon
Description	"91500 Zircon, Duluth Anorthosite"
Data Source	"Paces and Miller, 1993, J. Gephys. Res., 98 (B8), pp. 13,997-14,013. ratios calculated using Rich's spreadsheet from ages in Pace and Miller."
URL
File Path	/Users/224742i/Documents/iolite/Reference materials/Z_FC1.json
Notes
Measurement	Units	Value	Uncertainty
Age	Ma	1099	0.6
206Pb/238U	ratio	0.18587	0
207Pb/235U	ratio	1.9516	0
208Pb/232Th	ratio	0.0557	0
207Pb/206Pb	ratio	0.07614	0
176Hf/177Hf	ratio	0.282172	0
Z_GJ1
Matrix	Zircon
Description	Gemoc GJ 1 Zircon, natural standard
Data Source	NIGL ID_TIMS data from D.Condon; 208/232 (model) data from Jackson et al. 2004 Chem Geol 211, 47-69. Hf data from More et al. 2008 Chem Geol 255, 231-235; Trace element data from Liu et al., 2010, Chi. Sci.Bull.55
URL
File Path	/Users/224742i/Documents/iolite/Reference materials/Z_GJ1.json
Notes	204-based ratios are approximate, 207/235 value here calculated from 238/235 natural (137.88), errors are 2SD
Measurement	Units	Value	Uncertainty
Age	Ma	602	0.7
Ce	ppm	16	0
Dy	ppm	19.9	0
Er	ppm	29.3	0
Eu	ppm	1	0
Gd	ppm	6.9	0
Hf	ppm	6558	0
Ho	ppm	6.81	0
La	ppm	0.005	0
Lu	ppm	13.1	0
Nb	ppm	1.51	0
Nd	ppm	0.59	0
Pb	ppm	25.7	0
Pr	ppm	0.03	0
Si	ppm	0	0
Sm	ppm	1.42	0
Tb	ppm	1.95	0
Th	ppm	9.51	0
Ti	ppm	3.55	0
Tm	ppm	6.25	0
U	ppm	287	0
Y	ppm	246	0
Yb	ppm	62	0
Zr	ppm	431400	0
176Hf/177Hf	ratio	0.282	0
206Pb/238U	ratio	0.097853	0
207Pb/235U	ratio	0.814995	0
208Pb/232Th	ratio	0.03074	0
207Pb/206Pb	ratio	0.06041	0
206Pb/208Pb	ratio	88.08	0
206Pb/204Pb	ratio	71975	0
207Pb/204Pb	ratio	7430.5	0
208Pb/204Pb	ratio	0	0
Z_KLDF
Matrix	Zircon
Description	Zircon Sri Lankan Gemstone Taylor 2018
Data Source	"Taylor et al, 2018"
URL	http://www.awebpageforthisstandardifappropriate.org
File Path	/Users/224742i/Documents/iolite/Reference materials/Z_KLDF.json
Notes	Trace element uncertainties are 2SE on 30-100 analyses
Measurement	Units	Value	Uncertainty
Ti	ppm	2.8	0.3
Y	ppm	60	1.36
Nb	ppm	0.34	0.03
Hf	ppm	6634	79.91
U	ppm	507	15.04
Th	ppm	74.9	2.36
La	ppm	0.007	0.01
Ce	ppm	0.89	0.05
Pr	ppm	0.019	0.01
Nd	ppm	0.26	0.05
Sm	ppm	0.3	0.05
Eu	ppm	0.061	0.02
Gd	ppm	1.33	0.11
Tb	ppm	0.44	0.02
Dy	ppm	5.34	0.2
Ho	ppm	2.09	0.07
Er	ppm	10.1	0.29
Tm	ppm	2.26	0.06
Yb	ppm	22.2	0.65
Lu	ppm	4.17	0.12
Si	ppm	149207	1300
Zr	ppm	432960	2313
176Hf/177Hf	ratio	0.2817	1.3e-05
238U/206PbU	ratio	11.1585	0.0167
206Pb/238U	ratio	0.089618	0.00013389
207Pb/235U	ratio	0.725313	7.6e-05
207Pb/206Pb	ratio	0.058725	5.8e-05
Z_MT
Matrix	Zircon
Description	"Mud Tank Zircon, natural standard"
Data Source	I made this crap up do not believe anything but the Hf absolute value
URL
File Path	/Users/224742i/Documents/iolite/Reference materials/Z_MT.json
Notes	there is very little realistic about the absolute values or errors of UThPB, Hf is ok.
Measurement	Units	Value	Uncertainty
Age	ratio	0	732
176Hf/177Hf	ratio	0.282507	8e-06
206Pb/238U	ratio	0.12025	0
207Pb/235U	ratio	1.05833	0
208Pb/232Th	ratio	0.02667	0.00015
207Pb/206Pb	ratio	0.0638	1e-05
206Pb/208Pb	ratio	9.35454	0
206Pb/204Pb	ratio	10000	0
207Pb/204Pb	ratio	749	0
208Pb/204Pb	ratio	1069	0
Z_MUN0
Matrix	Zircon
Description	Fisher et al., CG 286 (2011) 32-47
Data Source
URL
File Path	/Users/224742i/Documents/iolite/Reference materials/Z_MUN0.json
Notes
Measurement	Units	Value	Uncertainty
Gd	ppm	0	0
Dy	ppm	0	0
Tb	ppm	0	0
Yb	ppm	0	0
Lu	ppm	0	0
176Hf/177Hf	ratio	0.282135	7e-06
Z_MUN1
Matrix	Zircon
Description	Fisher et al., CG 286 (2011) 32-47
Data Source
URL
File Path	/Users/224742i/Documents/iolite/Reference materials/Z_MUN1.json
Notes
Measurement	Units	Value	Uncertainty
176Hf/177Hf	ratio	0.282135	7e-06
176Lu/177Hf	ratio	0.002	0
176Yb/177Hf	ratio	0.06	0
Z_MUN2
Matrix	Zircon
Description	Fisher et al., CG 286 (2011) 32-47
Data Source
URL
File Path	/Users/224742i/Documents/iolite/Reference materials/Z_MUN2.json
Notes
Measurement	Units	Value	Uncertainty
176Hf/177Hf	ratio	0.282135	7e-06
176Lu/177Hf	ratio	0.004	0
176Yb/177Hf	ratio	0.12	0
Z_MUN3
Matrix	Zircon
Description	Fisher et al., CG 286 (2011) 32-47
Data Source
URL
File Path	/Users/224742i/Documents/iolite/Reference materials/Z_MUN3.json
Notes
Measurement	Units	Value	Uncertainty
176Hf/177Hf	ratio	0.282135	7e-06
176Lu/177Hf	ratio	0.007	0
176Yb/177Hf	ratio	0.22	0
Z_MUN4
Matrix	Zircon
Description	Fisher et al., CG 286 (2011) 32-47
Data Source
URL
File Path	/Users/224742i/Documents/iolite/Reference materials/Z_MUN4.json
Notes
Measurement	Units	Value	Uncertainty
176Hf/177Hf	ratio	0.282135	7e-06
176Lu/177Hf	ratio	0.014	0
176Yb/177Hf	ratio	0.44	0
Z_Maniitsoq
Matrix	Zircon
Description	“natural zircon, Greenland“
Data Source	“Jeffrey Marsh, Laurentian University.”
URL
File Path	/Users/224742i/Documents/iolite/Reference materials/Z_Maniitsoq.json
Notes
Measurement	Units	Value	Uncertainty
Age	Ma	3008.9	0.66
206Pb/238U	ratio	0.59095	0
207Pb/235U	ratio	18.2006	0.40528
207Pb/206Pb	ratio	0.223719	0.00138
U	ratio	0	141
Th	ratio	0	154
Hf	ratio	0	10849
176Hf/177Hf	ratio	0.280864	2.1e-05
Z_MudTank
Matrix	Zircon
Description	"Mud Tank Zircon, natural standard"
Data Source	I made this crap up do not believe anything but the Hf absolute value
URL
File Path	/Users/224742i/Documents/iolite/Reference materials/Z_MudTank.json
Notes	there is very little realistic about the absolute values or errors of UThPB, Hf is ok.
Measurement	Units	Value	Uncertainty
Age	ratio	0	732
176Hf/177Hf	ratio	0.282507	8e-06
176Lu/177Hf	ratio	0.000106	6.8e-05
206Pb/238U	ratio	0.12025	0
207Pb/235U	ratio	1.05833	0
208Pb/232Th	ratio	0.02667	0.00015
207Pb/206Pb	ratio	0.0638	1e-05
206Pb/208Pb	ratio	9.35454	0
206Pb/204Pb	ratio	10000	0
207Pb/204Pb	ratio	749	0
208Pb/204Pb	ratio	1069	0
Z_OG1
Matrix	Zircon
Description	"OG1 Zircon, natural standard"
Data Source	Stern et al. 09, GGR (UPb)
URL
File Path	/Users/224742i/Documents/iolite/Reference materials/Z_OG1.json
Notes
Measurement	Units	Value	Uncertainty
Age	ratio	0	3465.4
Pb	ppm	424	0
Th	ppm	120	0
U	ppm	150	0
176Hf/177Hf	ratio	0.280633	3.4e-05
178Hf/177Hf	ratio	1.46717	1.3e-05
206Pb/238U	ratio	0.705	0
207Pb/235U	ratio	29.06	0
207Pb/206Pb	ratio	0.29907	0.00011
206Pb/204Pb	ratio	23712	0
Z_Plesovice
Matrix	Zircon
Description	Plesovice Zircon, natural standard
Data Source	Slama et al., 2008, Chem. Geol. 249, 1-35
URL
File Path	/Users/224742i/Documents/iolite/Reference materials/Z_Plesovice.json
Notes
Measurement	Units	Value	Uncertainty
Age	Ma	337	0
206Pb/238U	ratio	0.05368	0
207Pb/235U	ratio	0.394	0
208Pb/232Th	ratio	0	0
207Pb/206Pb	ratio	0.05325	0
206Pb/208Pb	ratio	31.2138	0
206Pb/204Pb	ratio	51930	0
207Pb/204Pb	ratio	0	0
208Pb/204Pb	ratio	0	0
Pb	ppm	39	0
Th	ppm	78	0
U	ppm	755	0
176Hf/177Hf	ratio	0.282482	0
Z_R33
Matrix	Zircon
Description	“R33 zircon standard from coarse grained biotite-hnbld monzodiorite of Braintree Complex, VT, northeastern USA.”
Data Source	ID TIMS Pb ratios, ratios and traces from Black et al., Chem Geol 205, 115-140. Hf ratio from Fisher et al., Gcubed, 2014, 15 (1) 121-139
URL
File Path	/Users/224742i/Documents/iolite/Reference materials/Z_R33.json
Notes
Measurement	Units	Value	Uncertainty
Age	ratio	0	419
Ce	ppm	4.44	0.44
Dy	ppm	131	25
Eu	ppm	1.04	0.19
Hf	ppm	9497	170
La	ppm	0	0
Lu	ppm	97	13
Nd	ppm	2.17	0.41
Sm	ppm	4.55	0.86
Th	ppm	100	20
U	ppm	148	20
176Hf/177Hf	ratio	0.282764	1.4e-05
176Lu/177Hf	ratio	0.001989	0.000869
206Pb/238U	ratio	0.06679	0
207Pb/235U	ratio	0.5087	0
207Pb/206Pb	ratio	0.05524	0
Z_Temora2
Matrix	Zircon
Description	Temora2 Zircon, natural standard
Data Source	Black et al., 2004, Chem. Geol.205, 115-140 and Woodhead & Hergt, 2005 Geostandards 29, 183-195 for Hf data
URL
File Path	/Users/224742i/Documents/iolite/Reference materials/Z_Temora2.json
Notes
Measurement	Units	Value	Uncertainty
Age	Ma	417	0
176Hf177Hf	ratio	0.282686	0
206Pb/238U	ratio	0.0667	0
207Pb/235U	ratio	0.5075	0
208Pb/232Th	ratio	0	0
207Pb/206Pb	ratio	0.0552	0
206Pb/208Pb	ratio	0	0
206Pb/204Pb	ratio	0	0
207Pb/204Pb	ratio	0	0
208Pb/204Pb	ratio	0	0

## Sheet: Data-day1
	Duration (s)	Final Pb206/U238_mean	Final Pb206/U238_2SE(prop)	Final Pb206/U238 age_mean	Final Pb206/U238 age_2SE(prop)	Final Pb207/U235_mean	Final Pb207/U235_2SE(prop)	Final Pb207/U235 age_mean	Final Pb207/U235 age_2SE(prop)	Final Pb208/Th232_mean	Final Pb208/Th232_2SE(prop)	Final Pb208/Th232 age_mean	Final Pb208/Th232 age_2SE(prop)	Final Pb207/Pb206_mean	Final Pb207/Pb206_2SE(prop)	Final Pb207/Pb206 age_mean	Final Pb207/Pb206 age_2SE(prop)	Final U238/Pb206_mean	Final U238/Pb206_2SE(prop)	Final U/Th_mean	Approx_U_PPM_mean	Approx_Th_PPM_mean	Approx_Pb_PPM_mean		rho 207Pb/206Pb v 238U/206Pb	rho 206Pb/238U v 207Pb/235U
240
240 - 1.d	28	0.0418513	0.00139345	264.248	8.6228	0.363517	0.0582036	307.738	39.9648	0.0153102	0.0015356	306.868	30.5208	0.06438	0.00879372	630.476	275.498	23.437	0.783974	1.61581	141.363	89.0648	13.4804		-0.460916	0.637745
240 - 2.d	28	0.0425042	0.00144169	268.282	8.91335	0.4286	0.0613558	355.299	43.0256	0.0155916	0.0013928	312.525	27.6915	0.0737912	0.00927813	980.382	277.948	23.6555	0.774062	1.85483	126.221	71.1345	10.1257		0.171486	0.0145762
240 - 4.d	28	0.0518241	0.00302198	325.402	18.522	1.69562	0.329158	936.496	137.501	0.0563826	0.00934785	1099.09	179.014	0.225512	0.035686	2873.61	285.198	19.1529	1.0457	1.97651	74.6214	38.2457	21.0821		-0.583339	0.781107
240 - 5.d	28	0.0416659	0.00148941	263.089	9.21833	0.313155	0.0384335	274.222	29.7892	0.013245	0.000978394	265.875	19.516	0.0529212	0.00516399	281.581	250.971	24.1857	0.914902	1.3403	174.828	130.394	15.7749		0.352513	-0.00244561
240 - 6.d	28	0.0421715	0.00185011	266.172	11.4373	0.472484	0.077144	403.57	50.77	0.0187132	0.00237624	374.114	47.0903	0.0825327	0.0126113	1351.29	256.639	23.893	1.05407	1.97202	62.8835	32.4076	5.73201		0.241451	0.0465326
240 - 7.d	28	0.0442222	0.0016886	278.869	10.4088	0.618716	0.104813	478.923	61.5213	0.0266007	0.00418581	528.638	82.0215	0.103657	0.0156149	1524.31	282.126	22.719	0.829084	2.00744	134.768	68.5848	15.1679		-0.153545	0.424221
240 - 8.d	28	0.0573062	0.00585414	357.996	35.4146	2.33442	0.760245	967.883	233.918	0.0703849	0.0194099	1333.87	359.202	0.240526	0.0620854	2228.19	577.258	19.1221	1.73658	1.64836	108.355	64.7745	32.7273		-0.892246	0.961942
240 - 9.d	28	0.0417636	0.00139235	263.705	8.61377	0.268335	0.0419593	241.062	35.6635	0.0122588	0.00114603	246.14	22.8871	0.0473939	0.00674408	293.036	253.246	23.8606	0.809016	1.59891	139.529	89.9038	9.66139		0.201708	0.0556489
240 - 10.d	28	0.0418844	0.00134334	264.458	8.30868	0.28808	0.0464913	251.262	36.9525	0.0144861	0.00126068	290.546	25.1043	0.05144	0.00793089	232.376	358.473	23.7584	0.766116	1.62612	112.673	69.4601	9.27143		0.288955	-0.0325626
240 - 11.d	28	0.0409722	0.00112018	258.831	6.9332	0.358086	0.0515372	313.72	38.2652	0.013988	0.000963825	280.7	19.2145	0.0625792	0.00746525	630.948	261.427	24.3786	0.657247	1.24205	239.223	196.755	24.8344		-0.138019	0.328217
240 - 12.d	22.794	0.0420545	0.00126443	265.526	7.82244	0.411732	0.0896826	321.213	46.9694	0.0166592	0.00222531	333.497	44.0106	0.0663469	0.0114014	669.639	364.521	23.6762	0.739287	1.70124	160.03	100.433	14.1021		-0.418297	0.638371
240 - 13.d	28	0.0414072	0.0011765	261.52	7.27922	0.468344	0.0815089	376.358	54.0527	0.0160722	0.00170999	321.966	33.92	0.0789229	0.0118052	1087.82	314.509	24.1163	0.739332	1.55063	152.139	99.772	14.9039		-0.114292	0.26684
240 - 14.d	28	0.0441026	0.00144385	278.16	8.91212	0.514575	0.0729449	420.001	46.2348	0.0224346	0.00247101	447.799	48.8521	0.0867847	0.0110735	1378.77	244.385	22.8847	0.752491	1.95331	104.258	53.5904	11.5918		0.0766104	0.124213
240 - 15.d	22.492	0.0439611	0.00236248	277.189	14.5542	0.672501	0.245497	497.904	129.581	0.0264763	0.00709312	523.376	137.287	0.101798	0.0296337	1369.09	491.743	22.9278	1.18636	1.95549	114.186	60.2727	17.0091		-0.717331	0.850706
240 - 16.d	21.988	0.0516549	0.00398157	324.231	24.3624	1.84121	0.532028	903.172	184.713	0.0544474	0.0133722	1055.74	253.254	0.223901	0.0511637	2589.29	456.073	20.081	1.6093	1.58348	92.1854	57.8373	27.7817		-0.77541	0.878791
240 - 17.d	28	0.0457681	0.00228403	288.318	14.0166	1.17714	0.279038	754.409	139.328	0.0392422	0.00715555	772.23	137.833	0.178479	0.0354975	2060.99	465.9	22.2102	1.02412	1.61034	124.266	71.4236	23.3107		-0.603501	0.803913
240 - 18.d	28	0.0437533	0.00139535	276.008	8.61386	0.739895	0.107734	555.54	64.85	0.0281902	0.00312103	560.889	61.2736	0.124529	0.015978	1860.58	246.662	23.0486	0.729318	1.48559	144.931	99.5713	23.1995		0.0310383	0.230412
240 - 19.d	23.566	0.0505164	0.00322433	317.388	19.7546	1.44158	0.206768	883.387	85.9463	0.044633	0.00597023	879.369	115.038	0.21704	0.0266434	2983.89	207.917	20.2051	1.29187	1.3971	43.6228	31.1974	11.9738		-0.164496	0.627474
240 - 20.d	28	0.0468998	0.00169961	295.38	10.4607	0.99704	0.136049	697.524	70.5687	0.0334144	0.00308344	663.449	60.0728	0.152882	0.0158845	2435.67	206.301	21.4745	0.751165	1.51539	161.434	111.55	32.9961		-0.312726	0.616841
240 - 21.d	28	0.0643407	0.00375327	401.504	22.7472	2.40946	0.396269	1183.69	120.237	0.0708597	0.00871511	1376.24	163.848	0.260943	0.0303351	3176.84	200.069	16.0441	0.958597	1.33176	114.365	87.6147	57.1586		-0.526465	0.797192
240 - 22.d	28	0.046181	0.00178148	290.94	10.9691	0.570424	0.0831086	447.633	52.8007	0.0247165	0.00238065	492.947	46.8656	0.0888928	0.0108519	1309.34	268.985	21.9688	0.836963	1.88587	112.433	60.6856	13.2623		0.0627787	0.211452
240 - 23.d	22.29	0.0651126	0.00455776	406.088	27.4339	3.78166	0.743099	1503.94	142.427	0.0868139	0.00779845	1678.65	144.998	0.382131	0.0467345	3833.59	171.623	15.7155	1.07105	1.30411	104.395	79.3321	59.4986		-0.559893	0.859351
240 - 24.d	28	0.0574483	0.00433872	359.429	26.4296	2.23081	0.496696	1044.86	170.838	0.0636095	0.0112295	1232.76	213.161	0.246888	0.0425626	2840.05	334.537	18.7089	1.44146	1.42046	151.148	109.654	67.3793		-0.86261	0.939518
240 - 25.d	22.794	0.0663004	0.00217742	413.734	13.1761	3.47883	0.388073	1527.54	90.3117	0.0857475	0.00535393	1661.57	99.5926	0.393392	0.0332506	3868.94	125.189	15.1371	0.538121	1.20791	106.53	89.0847	65.6846		0.0212385	0.375145
482
482 - 1.d	25.043	0.0411918	0.00122591	260.185	7.58706	0.359664	0.0780176	298.207	52.0916	0.015448	0.00214219	309.381	42.4513	0.0613577	0.0111963	451.078	370.348	24.3238	0.684085	1.86903	292.399	155.451	21.5722		-0.417162	0.556216
482 - 2.d	26.978	0.0390508	0.00108056	246.924	6.70408	0.294857	0.0383323	259.634	30.3772	0.01309	0.0010184	262.775	20.3273	0.0553012	0.00627447	350.73	282.626	25.5483	0.637717	1.96451	218.835	110.465	12.5644		0.207775	-0.0223443
482 - 3.d	19.797	0.0402539	0.0015682	254.355	9.71596	0.505962	0.0779962	407.98	51.4301	0.023057	0.00250391	460.277	49.4598	0.0889691	0.0115727	1383.43	259.984	25.11	0.981596	2.1168	246.527	117.196	23.7437		0.0910366	0.140335
482 - 4.d	25.191	0.0400571	0.00113098	253.163	7.00898	0.272761	0.0312099	246.16	23.6137	0.0124988	0.000882788	251.008	17.6198	0.0492316	0.00450093	128.747	224.562	24.9	0.627762	2.37845	361.903	153.91	17.4551		0.592979	-0.336117
482 - 5.d	28	0.0398113	0.00103384	251.644	6.40961	0.285625	0.0352062	255.714	28.4135	0.0130267	0.000969151	261.522	19.3352	0.0513448	0.00488239	228.185	220.251	25.221	0.659887	2.60878	370.563	142.584	17.1412		-0.0496266	0.273993
482 - 6.d	25.46	0.0384575	0.00104235	243.245	6.46799	0.400607	0.0534107	337.637	38.856	0.0191997	0.00203668	384.001	40.3191	0.0788127	0.00967052	1181.86	235.853	26.1146	0.696407	1.85073	258.454	145.044	22.7424		0.222657	-0.0671219
482 - 7.d	28	0.0366683	0.00106782	232.123	6.63916	0.28558	0.033896	253.344	26.4188	0.0131753	0.00104016	264.47	20.7492	0.0570068	0.00563976	421.712	216.777	27.3509	0.771018	1.98647	312.443	157.122	18.7899		0.460583	-0.280418
482 - 8.d	28	0.03898	0.00113848	246.479	7.06258	0.282593	0.0328567	253.92	27.2517	0.0119611	0.000816761	240.276	16.3186	0.0525588	0.00492263	340.748	210.903	25.7241	0.725427	1.26116	233.175	188.11	20.0014		0.364194	-0.11297
482 - 9.d	28	0.0409884	0.00142472	258.902	8.82068	0.309965	0.0451186	269.54	34.9447	0.0124718	0.00121678	250.373	24.2853	0.0541751	0.00691862	291.767	317.468	24.4337	0.842571	2.19078	159.342	72.3401	8.2467		0.391853	-0.0953317
482 - 10.d	20.539	0.0416592	0.00147746	263.066	9.14073	0.360139	0.0484205	314.195	34.3156	0.0171399	0.00192938	343.208	38.3288	0.0624024	0.00661089	734.434	237.873	24.2087	0.857708	2.3864	289.537	123.072	18.5194		-0.0386185	0.305948
482 - 12.d	23.741	0.0400116	0.00102214	252.89	6.33405	0.288156	0.0341189	255.625	26.764	0.0132547	0.000904175	266.096	18.0327	0.0525979	0.00488994	254.281	211.74	24.8401	0.595078	1.72601	426.031	250.876	29.5353		0.00547159	0.162532
482 - 13.d	28	0.039907	0.000995186	252.241	6.16767	0.456908	0.101869	360.152	61.6244	0.018456	0.00377708	367.949	73.8961	0.0749574	0.0127594	1062.87	386.036	24.8932	0.665316	1.58963	366.002	230.365	36.8598		-0.34049	0.418098
482 - 14.d	28	0.0391798	0.000955244	247.733	5.92602	0.257849	0.0280901	232.049	22.652	0.0119281	0.000828895	239.616	16.5593	0.0490026	0.00424137	81.7581	208.516	25.5284	0.594332	1.87774	497.611	264.171	30.4032		0.457796	-0.198136
482 - 15.d	23.471	0.0399397	0.00117663	252.433	7.29632	0.392617	0.0627775	328.992	44.8868	0.0166202	0.00187953	332.85	37.333	0.0736002	0.0108547	954.757	294.559	25.1808	0.762049	2.15711	297.7	138.11	22.7384		0.175326	-0.0489403
482 - 16.d	28	0.0396944	0.00106603	250.917	6.60545	0.465185	0.0874046	378.947	58.9847	0.0214373	0.00363874	427.176	71.6374	0.0839698	0.0142622	1022.02	337.805	25.2338	0.687125	2.35422	456.535	193.856	37.8092		0.0393585	0.095721
482 - 17.d	10.73	0.0385944	0.00145421	244.092	9.02215	0.342884	0.0385305	298.735	29.1633	0.0150413	0.00149358	301.672	29.7363	0.0656535	0.00613253	761.848	191.784	26.039	0.968192	1.98252	498.377	252.164	33.1047		0.409934	-0.0865684
482 - 18.d	28	0.0364828	0.00202035	230.854	12.5721	0.286157	0.0316305	254.383	24.8365	0.0137968	0.00092972	276.895	18.5248	0.0605274	0.00561434	570.359	213.111	27.9508	1.53205	1.89203	298.76	167.478	21.6715		0.540826	0.209706
482 - 19.d	28	0.039349	0.00108054	248.773	6.69963	0.265997	0.0308866	240.388	25.528	0.0120845	0.000725824	242.761	14.4983	0.0497309	0.00447926	240.732	220.522	25.5418	0.695433	1.9217	371.779	193.218	21.9816		0.365248	-0.0578487
482 - 20.d	28	0.0381509	0.00117262	241.328	7.28667	0.297473	0.038632	261.64	29.818	0.0150701	0.00136279	302.148	27.1256	0.0584982	0.00654049	444.271	253.907	26.2042	0.827802	2.43495	261.196	109.835	15.5126		0.22367	-0.0364068
482 - 21.d	28	0.038073	0.000991679	240.86	6.15903	0.336279	0.0392909	292.296	29.6018	0.0149909	0.00108365	300.657	21.577	0.0646095	0.00549901	780.509	172.689	26.2065	0.760304	2.09265	313.674	147.393	20.1053		-0.16434	0.500463
482 - 22.d	28	0.0394592	0.00100457	249.463	6.22895	0.320978	0.0376884	280.676	28.8806	0.0143765	0.000958853	288.447	19.107	0.0606555	0.00604666	644.03	218.868	25.3675	0.671418	2.29615	320.9	138.45	18.5722		0.56586	-0.336859
482 - 23.d	15.112	0.0375451	0.00101814	237.587	6.32511	0.301152	0.0324609	266.742	25.2907	0.0141325	0.000893843	283.622	17.8076	0.0603434	0.0050427	579.906	184.831	26.704	0.723088	2.06611	596.136	286.556	36.8029		0.228535	0.118279
482 - 25.d	28	0.0388174	0.00134629	245.449	8.34949	0.262581	0.0431262	236.343	32.6714	0.0124106	0.00109526	249.188	21.8617	0.0506263	0.00691456	147.537	320.197	26.0413	0.896801	2.2692	162.49	71.3508	8.3819		-0.146944	0.338228
483
483 - 1.d	28	0.0390736	0.00115784	247.058	7.18431	0.246161	0.0360897	220.16	29.3806	0.0125143	0.000958869	251.295	19.1285	0.0468191	0.00623263	-4.11708	338.951	25.5656	0.763616	2.08038	171.171	82.012	9.65411		0.390578	-0.164452
483 - 2.d	25.528	0.0375734	0.000876461	237.765	5.44445	0.261868	0.0282495	237.252	21.9086	0.0120714	0.000701789	242.505	14.0162	0.0519141	0.0041788	290.851	177.202	26.612	0.591274	2.01333	436.207	214.995	23.9349		0.0880885	0.181705
483 - 3.d	28	0.0376998	0.00123739	238.52	7.69019	0.699326	0.13271	529.611	81.0611	0.0198176	0.00182128	396.32	36.1003	0.137025	0.0250934	2029.25	329.961	26.0957	0.809356	1.36311	137.864	108.435	22.3291		0.280565	-0.176879
483 - 4.d	28	0.0425604	0.00128406	268.646	7.93493	0.418934	0.0568434	354.364	39.0721	0.0179203	0.00145742	358.814	28.9146	0.0723189	0.00818821	1036.11	210.593	23.5772	0.725173	2.07462	225.487	107.161	18.1791		-0.0445104	0.312915
483 - 5.d	28	0.0403263	0.00109504	254.832	6.7855	0.393921	0.0476051	340.995	32.5177	0.0165029	0.00128128	334.382	24.1867	0.0713753	0.00712116	978.658	209.224	24.8445	0.656015	2.57019	284.855	113.343	18.8217		0.333427	-0.096179
483 - 7.d	28	0.03806	0.00102722	240.776	6.37887	0.271038	0.0325907	244.43	27.03	0.0120406	0.000853169	241.858	17.0411	0.0532919	0.00539278	293.165	220.116	26.3289	0.694247	1.98611	350.297	176.4	19.9372		0.387456	-0.186192
483 - 8.d	28	0.0396315	0.000997944	250.532	6.18657	0.274874	0.0340385	251.503	30.2231	0.0122854	0.000941886	246.726	18.798	0.0528199	0.00550866	311.423	252.238	25.3209	0.635329	2.24395	286.638	125.862	14.5916		0.0372306	0.214706
483 - 10.d	28	0.0369776	0.000867248	234.061	5.39309	0.304217	0.0308887	269.103	24.1141	0.0124875	0.000669461	250.82	13.3621	0.0613101	0.00464079	625.995	160.38	27.0451	0.617614	2.20233	635.262	288.077	33.4785		0.41106	-0.0917758
483 - 11.d	28	0.0386493	0.00123923	244.417	7.68871	0.401685	0.0488361	339.53	35.6255	0.0150683	0.00094947	302.235	18.9077	0.0769139	0.00779578	1018.45	223.477	26.0975	0.835681	2.07455	240.702	115.487	16.0045		0.319855	-0.00902452
483 - 12.d	28	0.0383995	0.00101453	242.885	6.29648	0.281275	0.0314446	250.446	25.077	0.0116309	0.000719292	233.698	14.3695	0.0541628	0.00484251	337.109	197.661	26.1547	0.686443	1.7717	439.66	245.828	26.2632		0.216007	0.0556078
483 - 13.d	28	0.0385915	0.00123254	244.059	7.64853	0.271643	0.0387457	244.14	29.8705	0.0122664	0.00119527	246.277	23.8543	0.0510253	0.00638413	205.886	319.022	26.0329	0.805701	2.14286	162.852	75.5165	8.32179		0.27702	-0.0994342
483 - 14.d	28	0.0389616	0.000951332	246.38	5.90535	0.277675	0.0294069	248.022	23.3444	0.0132174	0.000780902	265.368	15.5795	0.0521951	0.00422059	270.431	204.092	25.7464	0.647859	2.23831	465.072	211.257	25.3354		0.25883	0.0176159
483 - 15.d	28	0.0390761	0.00117343	247.072	7.27607	0.485193	0.0756374	396.181	52.9744	0.0167508	0.00168361	335.478	33.4376	0.0889799	0.011952	1299.03	269.885	25.7682	0.764715	1.35005	235.659	183.04	25.4459		-0.0587915	0.284775
483 - 16.d	28	0.0377844	0.00106157	239.061	6.59639	0.76035	0.174937	532.329	101.308	0.0188937	0.00228216	377.753	45.2163	0.157776	0.0355259	1636.62	483.94	26.617	0.769304	1.61454	234.558	152.643	32.8291		0.504971	-0.382654
483 - 17.d	28	0.042294	0.00105686	267.018	6.53564	0.910648	0.0972696	662.547	57.1493	0.0348012	0.00267524	690.862	52.3225	0.15627	0.0126956	2422.28	151.655	23.7244	0.593628	2.12674	402.882	189.165	57.8987		-0.0596129	0.346004
483 - 18.d	28	0.0414638	0.00100577	261.885	6.22447	0.295399	0.0319672	261.761	25.0488	0.013004	0.000784554	261.11	15.6552	0.0522574	0.00414879	263.696	175.754	24.1878	0.585196	2.04719	391.614	189.7	23.2482		-0.00771885	0.323134
483 - 19.d	24.853	0.0382434	0.00125345	241.9	7.78301	0.279641	0.0392132	247.301	31.2171	0.0114049	0.000990388	229.131	19.7952	0.0540539	0.00689705	304.589	325.443	26.2051	0.805317	1.9975	188.189	94.1674	9.90025		0.266177	-0.0449314
483 - 20.d	28	0.0397982	0.0011977	251.549	7.427	0.282953	0.0383213	253.27	29.4822	0.0132388	0.00110974	265.717	22.1355	0.0516409	0.00590846	239.887	274.319	25.3087	0.781103	2.31104	190.38	81.5873	9.9753		0.163329	0.13935
483 - 21.d	28	0.0373753	0.000988061	236.525	6.14009	0.285649	0.0332219	253.547	26.2843	0.0118061	0.000813774	237.181	16.2538	0.0555498	0.0052574	428.518	220.583	26.7945	0.688346	1.56866	334.772	211.862	23.3349		0.331335	-0.142398
483 - 22.d	28	0.0402787	0.00125476	254.522	7.77706	0.704335	0.114078	528.353	71.3177	0.02361	0.00278916	470.826	55.0931	0.126833	0.017535	1825.46	287.966	24.9335	0.767382	1.86915	478.268	258.408	60.2488		-0.517375	0.643974
483 - 23.d	28	0.0393408	0.000907754	248.736	5.63047	0.299739	0.0321534	269.096	26.8741	0.0130533	0.000811614	262.088	16.198	0.0561575	0.00458429	433.662	183.286	25.4752	0.591193	2.47467	707.484	283.163	34.5801		0.0853519	0.181083
483 - 24.d	28	0.0343462	0.00141603	217.631	8.82266	0.322307	0.0405486	280.834	31.486	0.00692738	0.000739829	139.476	14.8368	0.0678851	0.00727254	721.976	264.398	28.8771	1.1736	1.20979	226.069	204.323	11.7098		0.239429	0.166687
483 - 25.d	28	0.0355421	0.000904615	225.127	5.63143	0.286223	0.0321669	254.294	25.3674	0.0107347	0.000677319	215.786	13.5446	0.0589912	0.00532406	498.545	200.791	28.2404	0.722465	2.15115	495.935	228.625	23.7741		0.361343	-0.0982675
483 - 26.d	28	0.0387322	0.00112973	244.941	7.00996	0.26555	0.0372475	235.959	29.7251	0.0121255	0.000874396	243.549	17.4514	0.0490577	0.00609077	44.0937	290.464	25.8977	0.783414	1.93191	276.715	143.399	16.6442		0.285642	-0.0270391
483 - 27.d	28	0.040094	0.00176188	253.318	10.9271	0.665917	0.18525	504.722	115.896	0.0292173	0.00514826	579.026	100.625	0.127332	0.034906	1623.43	496.945	24.9073	1.09233	1.87301	77.6269	40.327	13.3096		-0.0175432	0.0818802
483 - 28.d	28	0.0443879	0.00147599	281.189	8.68605	1.65517	0.262557	965.55	115.31	0.041077	0.00443886	811.661	86.6515	0.260661	0.035662	3084.39	339.664	22.3103	0.734186	1.38118	214.515	151.593	61.3363		-0.384235	0.561013
483 - 29.d	28	0.038739	0.00112672	244.984	6.99098	0.297651	0.0402273	261.248	31.3878	0.0122336	0.000771151	245.73	15.3985	0.0564118	0.00653681	283.246	284.922	25.976	0.755164	1.47958	243.715	164.847	18.6083		0.158653	0.0642716
483 - 30.d	28	0.0380097	0.000893795	240.474	5.55236	0.278612	0.0327766	247.939	26.031	0.0119054	0.000756552	239.175	15.1136	0.0535769	0.00519855	257.011	224.487	26.3753	0.632981	1.40974	419.165	294.934	34.0374		0.313326	-0.17001
506
506 - 1.d	28	0.0402681	0.000900852	254.486	5.58229	0.277332	0.029848	247.636	23.7281	0.0123478	0.000647685	248.034	12.9295	0.0510988	0.00424297	232.095	186.993	24.878	0.557127	1.78877	723.132	403.83	47.2845		0.119328	0.0979119
506 - 2.d	28	0.041107	0.00107194	259.67	6.63723	0.275702	0.0302577	246.209	24.038	0.0124721	0.000826163	250.482	16.4893	0.0486231	0.00422982	111.146	235.628	24.2866	0.637677	1.51076	326.579	219.819	25.1533		0.38259	-0.122891
506 - 3.d	28	0.0405072	0.000879652	255.969	5.45013	0.276422	0.0277319	247.386	22.039	0.0131008	0.000665506	263.064	13.2782	0.0503115	0.00357903	178.73	163.551	24.679	0.515452	1.9571	816.728	430.133	53.9412		-0.162508	0.403366
506 - 4.d	28	0.0413784	0.00101766	261.356	6.29808	0.298797	0.0325407	271.108	28.6614	0.0127457	0.000691271	255.972	13.7963	0.0539419	0.00464293	306.908	208.143	24.183	0.567962	1.35255	341.813	257.005	31.1429		0.119248	0.103108
506 - 5.d	28	0.0398677	0.00103367	251.994	6.40822	0.318561	0.0394464	281.482	29.0219	0.0145564	0.000925539	292.041	18.4369	0.0596578	0.00614901	607.955	209.069	25.1847	0.658524	2.08539	391.086	188.536	25.4782		-0.0673323	0.334579
506 - 6.d	28	0.0403726	0.000976115	255.128	6.04631	0.279645	0.0293201	249.652	23.1475	0.0122894	0.000732156	246.851	14.6179	0.0512807	0.0041879	209.235	192.227	24.7647	0.551699	1.93591	468.865	243.625	28.3067		0.337622	-0.0715505
506 - 7.d	28	0.0398372	0.000897953	252.339	5.28315	0.274086	0.0298232	249.132	25.7078	0.0130623	0.00066219	262.296	13.2137	0.0517147	0.00454587	212.384	194.293	25.0907	0.527159	1.55816	609.987	398.534	49.6092		0.390387	-0.191319
506 - 8.d	28	0.0401381	0.000863812	253.683	5.35367	0.273116	0.02788	244.65	22.3472	0.0125013	0.000677536	251.094	13.5245	0.0504557	0.00374597	171.334	186.883	24.9464	0.53894	1.52199	658.645	436.507	50.9962		0.18829	0.0687186
506 - 9.d	28	0.0408241	0.000914656	257.93	5.66367	0.286011	0.0323112	256.739	26.9331	0.0131445	0.000918082	263.885	18.3112	0.0530268	0.00492646	272.217	208.552	24.4897	0.569558	2.42887	493.688	204.109	25.0394		0.277702	-0.103145
506 - 10.d	28	0.041496	0.00101713	262.083	6.29421	0.277717	0.029812	249.943	22.644	0.0135246	0.000767466	271.501	15.3061	0.0491869	0.00401464	201.264	176.428	24.1099	0.614842	1.90576	598.756	315.875	39.3754		0.0788265	0.257741
506 - 11.d	28	0.0366201	0.00152582	231.777	9.49225	0.293532	0.0308865	262.356	23.2078	0.0139083	0.000826079	279.143	16.4659	0.0612703	0.00575256	595.531	207.106	27.8252	1.22308	1.48593	575.611	404.491	52.1085		0.753295	-0.362457
506 - 12.d	28	0.0399311	0.00103397	252.387	6.40964	0.262671	0.0274997	236.167	22.0701	0.0121339	0.000660248	243.758	13.1835	0.0493466	0.00398455	206.908	175.661	25.1441	0.656672	1.44385	536.672	380.939	41.4517		0.383903	-0.0997063
506 - 13.d	28	0.0390804	0.00088558	247.122	5.49339	0.258428	0.0270417	234.334	21.0106	0.0121004	0.000687366	243.085	13.722	0.0494862	0.00377226	142.395	174.029	25.581	0.609991	1.73715	596.969	349.1	39.0423		0.0927777	0.219705
506 - 14.d	28	0.040524	0.000941258	256.069	5.83072	0.278797	0.029161	250.744	22.1894	0.0126864	0.000740665	254.777	14.7782	0.0512171	0.00390687	237.641	179.45	24.682	0.594198	2.44641	878.19	361.522	42.7563		0.0389964	0.256513
506 - 15.d	28	0.0412846	0.000975465	260.778	6.03925	0.287329	0.0303892	255.626	24.0848	0.0125146	0.000717914	251.351	14.3318	0.0516612	0.00414833	249.391	190.737	24.2319	0.597426	1.578	602.118	386.973	44.8393		0.269792	-0.0302869
506 - 16.d	28	0.0409158	0.00097222	258.494	6.01933	0.312974	0.0321679	275.779	24.821	0.0127061	0.000737976	255.172	14.73	0.0568111	0.00414681	477.913	153.14	24.5038	0.577219	1.46045	481.824	340.687	39.8428		-0.00737171	0.361991
506 - 17.d	16.056	0.0400798	0.00120606	253.308	7.47683	0.267519	0.0312402	239.866	25.0512	0.0116025	0.000847117	233.129	16.9163	0.0498829	0.00514435	186.621	208.087	25.0537	0.767518	1.96746	756.532	385.876	40.2548		0.635705	-0.396779
506 - 18.d	28	0.0410295	0.000969505	259.199	6.00237	0.267885	0.0294416	239.996	23.6442	0.0128562	0.000795639	258.157	15.875	0.0482658	0.00410237	96.098	195.971	24.3797	0.550431	2.43759	504.639	207.518	25.0317		0.259069	-0.0141411
506 - 19.d	28	0.0412039	0.000956534	260.28	5.92367	0.279699	0.0331266	248.746	26.14	0.0117059	0.00077697	235.186	15.5214	0.0503327	0.00471487	147.246	222.947	24.2109	0.555825	2.09261	349.628	167.345	18.7119		0.196466	0.0716272
506 - 20.d	28	0.0404821	0.000987428	255.806	6.11545	0.262802	0.0271182	236.359	21.8209	0.0119506	0.000668174	240.095	13.3464	0.0483426	0.00372292	100.051	183.66	24.6549	0.642567	2.03731	566.279	284.217	31.0705		0.293756	0.0934848
506 - 21.d	28	0.0411031	0.000967057	259.654	5.98851	0.264761	0.032261	236.687	26.1932	0.0119866	0.000819128	240.787	16.36	0.0477167	0.00475643	25.1783	252.229	24.2841	0.620098	1.96119	400.103	209.775	23.4093		-0.00144929	0.178713
506 - 22.d	28	0.0432063	0.00120758	272.646	7.46213	0.287329	0.0334243	254.833	26.7149	0.0140267	0.00099873	281.463	19.9053	0.0488351	0.00460966	138.722	242.424	23.1975	0.632137	2.21793	237.174	103.183	13.737		0.298257	-0.0775375
506 - 23.d	28	0.0416433	0.000975668	262.998	6.03817	0.288648	0.030546	258.553	23.0792	0.012304	0.000752805	247.14	15.0261	0.0520066	0.00403786	273.689	182.056	24.0238	0.584216	1.68371	622.689	377.725	43.1419		0.108438	0.145891
506 - 24.d	28	0.0407769	0.00091672	257.638	5.67808	0.268347	0.029537	240.355	23.6643	0.0120438	0.000668351	241.957	13.3448	0.0492456	0.00419711	118.171	207.543	24.5691	0.554224	1.69112	640.329	383.072	41.6035		0.112903	0.0830186
Linked selection -25.d	18.131	0.0475204	0.00232174	299.18	14.2858	1.65319	0.275201	960.56	111.435	0.071018	0.0112036	1379.09	212.386	0.259274	0.0353595	3156.86	252.039	20.9575	1.19759	2.18742	265.466	124.934	80.1515		-0.445808	0.819744
506 - 26.d	28	0.0398689	0.000919212	252.561	5.9524	0.299588	0.0318645	266.889	25.7149	0.0123412	0.000662444	247.899	13.2273	0.0556942	0.0045512	417.378	171.02	25.0344	0.622519	1.55601	680.666	465.445	51.8546		0.425212	-0.134863
506 - 27.d	28	0.0401029	0.00102307	253.453	6.33962	0.264779	0.0280157	237.783	22.4949	0.0126464	0.000785152	253.97	15.6672	0.0494038	0.0039727	147.642	175.839	25.0288	0.636096	1.71392	550.285	327.557	36.4055		0.171518	0.211832
506 - 28.d	28	0.0395308	0.00110389	249.899	6.84584	0.249039	0.0322054	229.406	26.3115	0.0122039	0.000949777	245.098	18.9667	0.0474894	0.00537422	9.09683	281.657	25.2593	0.704464	1.63445	208.015	128.467	14.9035		0.258595	-0.0463573
506 - 29.d	28	0.0400018	0.00117971	252.813	7.31381	0.291553	0.0333874	258.285	26.3157	0.0123552	0.000743183	248.165	14.839	0.0538283	0.00501245	247.85	233.269	25.0856	0.78088	1.53684	292.764	193.579	21.8021		0.275763	0.00463937
506 - 30.d	28	0.0403097	0.00121165	254.718	7.50924	0.308713	0.0425673	269.387	33.0669	0.0112897	0.00111846	230.002	21.4511	0.056537	0.00671434	424.002	255.07	24.6057	0.732036	2.66031	163.873	60.7904	6.43553		0.0673093	0.170565
508
508 - 1.d	28	0.040218	0.00117962	254.153	7.30645	0.28018	0.0385495	251.045	29.2302	0.0119301	0.000826821	239.655	16.5162	0.0505257	0.00559178	152.494	296.892	24.9476	0.741968	1.4225	252.09	175.83	19.3432		-0.0468754	0.262653
508 - 2.d	28	0.0414257	0.00101363	261.649	6.27556	0.312746	0.0354281	274.748	27.4548	0.0139529	0.000906234	280.014	18.0634	0.0561893	0.00492936	447.611	181.584	24.1531	0.575289	1.88619	503.438	268.341	35.1465		-0.00666072	0.271501
508 - 3.d	28	0.0403292	0.000997753	254.858	6.18175	0.26645	0.0295346	238.797	23.7097	0.0124625	0.000868431	250.28	17.3335	0.0494019	0.00426728	179.356	225.552	24.8214	0.632099	1.37074	298.372	221.49	24.2985		0.109981	0.120624
508 - 4.d	21.964	0.0378529	0.00123972	239.479	7.70338	0.314466	0.0370813	276.091	28.5007	0.00999931	0.000786072	201.062	15.7334	0.0618824	0.00621007	706.326	219.766	26.618	0.906578	1.07799	302.89	290.317	25.8132		0.524718	-0.118589
508 - 5.d	28	0.035634	0.00117603	226.681	6.99906	0.442871	0.0560775	372.864	37.1376	0.0140252	0.000779164	281.483	15.5276	0.0928038	0.0107825	1444.12	204.941	27.6351	0.891458	1.08205	214.632	196.422	25.1025		0.358104	-0.110114
508 - 6.d	28	0.0399748	0.00111743	252.651	6.9284	0.299282	0.0364965	263.666	28.5787	0.0137331	0.00127758	275.527	25.4544	0.0553213	0.00564706	345.886	229.201	24.9048	0.727505	2.05762	229.428	112.662	14.5618		0.196046	0.0555486
508 - 7.d	28	0.0399359	0.000964854	252.422	5.9787	0.287599	0.0341372	254.891	26.8787	0.0120432	0.00082668	241.915	16.5069	0.0530064	0.00517929	309.648	218.482	25.1108	0.597771	2.05373	371.816	179.177	19.8678		0.292398	-0.0717352
508 - 8.d	28	0.0399395	0.00122332	252.423	7.58222	0.270029	0.0407139	247.499	32.8681	0.0123175	0.00093119	247.37	18.5863	0.0504267	0.00683805	127.692	347.413	25.121	0.817396	1.23509	157.998	126.575	14.9435		0.0728452	0.16816
508 - 9.d	28	0.0379903	0.00111954	240.336	6.95236	0.310979	0.0390805	278.678	29.8666	0.0128514	0.00102149	258.009	20.3785	0.0572131	0.00615526	539.708	236.098	26.383	0.740393	2.27652	313.46	138.464	15.6089		0.353713	-0.0885905
508 - 10.d	28	0.0413222	0.00121277	260.991	7.50148	0.304261	0.0337005	270.653	25.2307	0.0132887	0.000790668	266.791	15.7675	0.0545872	0.00473634	360.97	201.931	24.2694	0.7202	1.33905	335.284	249.846	30.9274		0.280082	0.19293
508 - 11.d	28	0.0391331	0.000851409	247.451	5.2799	0.286879	0.0300694	255.341	23.7627	0.0123403	0.000644839	247.884	12.8701	0.0530295	0.00414369	277.16	181.705	25.5429	0.573631	1.15443	634.537	541.279	61.4516		0.1287	0.100341
508 - 12.d	28	0.0442636	0.00139188	279.16	8.58947	0.295968	0.0456842	258.067	35.666	0.0124707	0.0012735	250.335	25.4	0.0483326	0.00666513	28.9749	377.304	22.5985	0.77179	1.82787	103.665	55.1435	6.61171		0.133716	9.67915e-05
508 - 13.d	28	0.0384616	0.000972845	243.275	6.03706	0.317629	0.0390177	277.647	29.8367	0.0132647	0.000910188	266.286	18.1572	0.0601358	0.00605805	574.549	236.387	26.0237	0.67687	1.76776	400.606	227.56	27.6616		0.0785088	0.122087
508 - 14.d	28	0.039418	0.00114756	249.196	7.11732	0.327801	0.042967	284.466	32.8654	0.0131493	0.00108262	263.939	21.5932	0.0601049	0.0063853	501.254	257.362	25.4296	0.71437	2.27133	201.836	88.8931	10.9883		-0.0281961	0.244246
508 - 15.d	28	0.0354961	0.00145953	224.789	9.0837	0.370641	0.0425585	321.009	32.6562	0.0125199	0.000876483	251.426	17.4939	0.0745694	0.00738629	1046.9	234.28	28.1959	1.12332	1.52473	212.145	139.156	16.1146		0.663561	-0.348445
508 - 16.d	28	0.0390186	0.00116295	246.716	7.21275	0.257092	0.032417	230.327	26.2079	0.0117554	0.000838536	236.162	16.7488	0.0477241	0.00509232	23.7769	253.492	25.6208	0.75312	1.36472	224.141	162.712	17.7546		0.341784	-0.0993055
508 - 17.d	28	0.038868	0.00101604	245.794	6.30691	0.295756	0.0350252	261.25	27.3763	0.0119294	0.000794436	239.649	15.8678	0.0548939	0.00523334	406.01	221.519	25.6224	0.702838	1.79077	348.104	191.793	20.7648		0.189414	0.0637376
508 - 18.d	22.325	0.0467951	0.00151899	294.77	9.34974	0.436786	0.0497628	365.934	34.9598	0.0212582	0.00152702	425.031	30.2008	0.0673781	0.00606733	866.825	200.14	21.4265	0.661026	2.16166	334.994	156.817	27.6288		0.317567	-0.00471803
508 - 19.d	28	0.037612	0.000941572	238	5.84761	0.311799	0.0332789	276.622	24.7354	0.01167	0.000640196	234.493	12.7906	0.0588276	0.00471121	639.765	148.679	26.6072	0.684938	1.7095	604.716	367.366	37.0828		0.0791398	0.210617
508 - 20.d	28	0.0402288	0.000869548	254.245	5.38841	0.292855	0.0322347	261.684	24.5373	0.0123379	0.000669635	247.831	13.3697	0.0524728	0.00440426	250.42	200.814	24.8528	0.518134	1.38412	670.752	490.63	53.8091		0.145866	0.0398907
508 - 21.d	28	0.039789	0.000839158	251.52	5.20407	0.301728	0.0305369	268.832	24.8908	0.0123973	0.000676497	249.017	13.5085	0.0552698	0.00390335	422.252	173.107	25.0686	0.468357	1.43641	651.219	450.444	50.2771		0.117394	0.101815
Linked selection- 22.d	30.112	0.0370525	0.00107343	234.511	6.6722	0.496	0.0620002	412.756	39.5191	0.0162103	0.00121115	324.9	24.0948	0.0968172	0.00954624	1592.43	172.525	27.1575	0.793887	1.62928	227.067	142.886	21.7903		-0.229951	0.478056
508 - 23.d	28	0.0384968	0.00096598	243.493	5.99683	0.313049	0.0364313	274.74	27.9102	0.0133637	0.000858849	268.272	17.1279	0.0597184	0.00581327	481.865	210.682	25.9971	0.689799	1.77614	468.591	269.611	32.4875		0.504915	-0.239462
508 - 24.d	28	0.039785	0.00102438	251.482	6.35098	0.268848	0.029428	240.793	23.5792	0.0128163	0.00073368	257.374	14.6418	0.0494063	0.00418434	175.561	190.594	25.1677	0.63027	2.12924	456.207	219.742	24.9529		0.161095	0.0908189
508 - 25.d	28	0.0398809	0.000884451	252.087	5.48278	0.277132	0.0307977	247.236	24.537	0.0119969	0.000636214	241.025	12.7063	0.0505802	0.00445065	144.862	228.768	25.0733	0.576943	1.68186	518.286	304.199	32.2215		0.28699	-0.109556
508 - 26.d	28	0.0438362	0.00111045	276.547	6.85869	0.309103	0.0327713	272.545	25.4028	0.0148266	0.0008919	297.432	17.7617	0.0512514	0.00405951	213.966	179.676	22.8395	0.60579	2.04404	526.607	257.999	34.4618		0.226484	0.157288
508 - 27.d	28	0.0414654	0.00114848	261.883	7.10923	0.287043	0.0365948	256.705	29.8792	0.0124519	0.00082517	250.079	16.4744	0.0495383	0.00516319	193.576	260.467	24.1697	0.702343	1.67403	216.547	129.653	14.4713		0.241017	0.0413948
508 - 28.d	28	0.0401758	0.00101883	253.905	6.31532	0.260992	0.0286146	234.521	23.0673	0.0131354	0.000887433	263.711	17.7061	0.047027	0.00404399	32.7866	220.659	24.9085	0.612429	4.20712	491.782	152.517	17.6177		0.391824	-0.12266
508 - 29.d	28	0.0403347	0.00121212	254.873	7.50858	0.28987	0.0347709	256.545	27.4782	0.0115519	0.000831467	232.097	16.609	0.0523734	0.00510269	287.714	199.13	24.8851	0.724729	1.80918	239.761	131.767	14.1217		0.194701	0.0333332
508 - 30.d	28	0.0405562	0.00100128	256.264	6.20469	0.297029	0.0317975	263.11	24.9725	0.0123305	0.000667121	247.685	13.3165	0.053558	0.00444035	345.17	184.934	24.6724	0.648307	1.09028	431.003	401.293	44.187		0.182683	0.0887571
COG1
COG1 - 1.d	28	0.705553	0.0162723	3440.47	61.5271	29.8865	2.83986	3480.95	93.6741	0.19441	0.00991019	3588.59	167.575	0.307821	0.0189605	3507.88	95.6166	1.42045	0.0329165	1.62748	129.745	79.7295	141.693		0.0141634	0.721591
COG1 - 2.d	28	0.691622	0.0162938	3387.46	61.9705	29.0848	2.73648	3457.55	88.2491	0.188914	0.00926141	3496.12	157.688	0.307011	0.0187588	3507.23	100.99	1.44584	0.0321114	1.61133	154.783	100.94	172.966		0.398454	0.725983
COG1 - 3.d	28	0.701404	0.0160886	3424.82	60.8825	29.9626	2.83506	3483.93	92.3705	0.191062	0.00963912	3532.1	163.54	0.309993	0.0193564	3521.23	92.521	1.4254	0.0343341	1.17233	90.7057	78.295	138.765		0.39277	0.527437
COG1 - 4.d	28	0.69812	0.0161068	3412.32	61.199	29.4028	2.76976	3465.81	93.5893	0.192591	0.00973871	3557.96	165.128	0.307208	0.0188313	3505.15	94.52	1.42972	0.0357063	1.90487	152.735	80.7023	142.461		0.133144	0.718548
COG1 - 5.d	28	0.710748	0.0162953	3460.1	61.5352	29.7252	2.81174	3476.05	93.9488	0.192395	0.00932649	3555.36	158.478	0.304716	0.018768	3495.21	90.5768	1.40696	0.0312767	1.38648	133.089	103.337	178.507		0.099211	0.687242
COG1 - 6.d	28	0.693984	0.016438	3396.41	62.4203	29.2575	2.77321	3463.17	88.9757	0.200088	0.0103004	3697.28	179.119	0.310561	0.019243	3520.98	95.8952	1.44463	0.0339517	1.80837	119.679	66.6392	122.299		0.0804081	0.683855
COG1 - 7.d	28	0.697662	0.0165562	3410.37	62.7322	28.9433	2.72945	3450.26	92.8328	0.18412	0.00886334	3414.8	151.241	0.30577	0.0187913	3497.68	94.8806	1.43705	0.0338441	1.24644	155.728	124.266	208.695		0.462954	0.628855
COG1 - 8.d	28	0.695411	0.0164716	3401.84	62.5026	29.0253	2.76951	3451.68	94.7824	0.196438	0.0100544	3622.77	169.664	0.305831	0.0190445	3500.87	92.8382	1.43467	0.033568	1.8078	97.8823	54.8449	97.5229		0.137332	0.675888
COG1 - 9.d	28	0.689361	0.016273	3378.82	62.1255	28.8874	2.72448	3448.43	92.0539	0.187891	0.00920595	3478.74	156.707	0.307761	0.0189715	3507.48	94.5158	1.4485	0.0342702	1.00141	130.643	130.593	226.185		0.301488	0.627296
COG1 - 10.d	28	0.713098	0.0175751	3468.35	66.2416	29.8301	2.81529	3479.84	92.5304	0.193959	0.00961868	3581.46	162.582	0.307825	0.017971	3508.03	89.7836	1.40364	0.0339003	1.40742	142.998	101.514	178.584		0.40184	0.604729
COG1 - 11.d	28	0.707356	0.015474	3447.66	58.2942	29.6209	2.79561	3472.85	92.1375	0.196788	0.00943808	3629.81	159.294	0.305692	0.0189735	3500.6	90.1082	1.41316	0.0291903	1.55515	110.687	73.4922	130.272		0.283304	0.476899
COG1 - 12.d	28	0.700925	0.0160795	3423	60.9193	29.008	2.73182	3454.97	88.2669	0.185117	0.00927412	3431.18	158.314	0.305807	0.0188597	3497.55	95.2174	1.42971	0.0328176	1.53212	149.228	97.2243	163.979		0.236134	0.627456
COG1 - 13.d	23.184	0.693526	0.0168177	3394.75	63.9796	28.7752	2.72648	3447.31	97.2702	0.183537	0.00951057	3404.07	162.342	0.301289	0.0187245	3474.27	96.9178	1.44151	0.0332098	1.77646	128.009	72.9355	118.62		0.1479	0.656774
COG1 - 14.d	28	0.705655	0.0160943	3440.93	60.9193	29.1501	2.76086	3459.16	95.6716	0.191332	0.00924683	3537.4	156.748	0.302323	0.0186402	3479.9	95.7596	1.42004	0.0326878	1.18366	136.37	116.744	199.794		0.134527	0.679065
COG1 - 15.d	24.189	0.693088	0.0168091	3393.02	63.9365	28.3206	2.70503	3427.82	94.8988	0.189115	0.00977773	3498.96	166.062	0.299676	0.0188395	3469.4	102.284	1.44325	0.0361587	1.76924	93.2447	52.1944	88.466		0.243629	0.518122
COG1 - 16.d	28	0.723463	0.0188949	3513.74	68.141	29.3551	2.79378	3463.1	92.8392	0.19163	0.00924678	3542.47	157.001	0.29839	0.0182538	3460.19	94.83	1.38399	0.0344871	1.55133	118.306	75.9455	129.755		0.0161939	0.839786
COG1 - 17.d	28	0.712337	0.0171314	3465.69	64.733	29.4918	2.78254	3468.61	92.6467	0.198425	0.00973255	3657.04	164.316	0.304082	0.0186706	3489.21	94.7245	1.40078	0.0312368	1.44585	135.942	94.8526	170.847		0.31478	0.68779
COG1 - 18.d	17.284	0.69008	0.0165464	3389.84	58.6033	28.3875	2.68786	3431.49	92.8656	0.188308	0.00991984	3485.6	168.883	0.302891	0.0188135	3482.99	96.2533	1.44696	0.0317501	1.29453	164.707	130.662	207.08		0.362946	0.605495
COG1 - 19.d	28	0.687356	0.015218	3371.64	58.1513	28.36	2.67645	3430.27	91.9648	0.188762	0.0094774	3493.17	160.854	0.301497	0.0185957	3475.6	95.631	1.4541	0.0342139	1.79417	130.646	72.8923	124.312		0.145839	0.725464
COG1 - 20.d	28	0.714906	0.0164755	3475.71	61.8039	28.715	2.70927	3450.02	98.4084	0.188709	0.00926366	3492.61	157.823	0.298845	0.0184546	3464.85	91.5792	1.40181	0.0320869	1.76084	136.531	79.4833	134.775		0.271808	0.672818
COG1 - 21.d	28	0.691798	0.0156691	3388.43	59.5596	27.8728	2.63408	3413.06	93.7116	0.189427	0.00923	3504.93	156.959	0.297397	0.0184928	3453.68	96.6786	1.44547	0.0337813	1.39191	150.715	109.474	184.155		0.194666	0.587087
COG1 - 22.d	28	0.719508	0.017583	3492.49	65.9966	29.1756	2.77353	3459.86	90.7081	0.192096	0.0101783	3548.73	172.481	0.300385	0.0185432	3469.8	95.5043	1.39039	0.0359154	1.6705	129.123	76.3275	130.019		0.339922	0.768865
COG1 - 23.d	28	0.696778	0.0163736	3413.43	59.187	28.6956	2.71266	3441.59	92.295	0.188624	0.00908101	3491.47	154.664	0.302437	0.0187036	3480.2	95.6605	1.43157	0.0339028	1.06572	107.859	102.009	173.481		0.319794	0.601256
COG1 - 24.d	28	0.722109	0.0169557	3502.56	63.475	29.398	2.78763	3467.84	89.021	0.19662	0.0096781	3626.54	163.053	0.298732	0.0184182	3461.37	94.5494	1.38217	0.0323814	1.5793	132.766	85.1827	150.789		0.0207779	0.701646
COG1 - 25.d	28	0.687513	0.0161518	3371.81	61.659	27.8594	2.66281	3417.79	93.5582	0.186993	0.0102643	3461.48	174.44	0.296487	0.0184259	3452.9	91.6553	1.45808	0.034275	1.5748	86.4681	55.1191	92.1722		0.106336	0.676681
COG1 - 26.d	28	0.702771	0.0158505	3430.11	59.9478	28.8693	2.71986	3447.86	92.018	0.190902	0.00941656	3529.78	159.574	0.299675	0.0183776	3466.69	95.2107	1.42562	0.0320487	1.60955	163.9	102.863	175.823		0.24887	0.634173
COG1 - 27.d	28	0.717263	0.0179402	3483.86	67.3924	28.8738	2.73216	3447.54	93.0846	0.189461	0.0103621	3503.44	176.312	0.298471	0.0187973	3462.02	101.109	1.39491	0.0369573	1.67501	84.7997	50.8142	88.5404		0.478121	0.560238
COG1 - 28.d	28	0.70528	0.0162772	3439.43	61.6366	28.538	2.68438	3436.72	92.1336	0.195435	0.00970273	3606.4	163.526	0.295378	0.0181606	3446.77	92.0912	1.41143	0.0346308	1.61325	120.309	75.3114	137.452		0.252147	0.730826
COG1 - 29.d	28	0.717465	0.0158458	3485.63	59.434	29.0837	2.74981	3454.76	92.0981	0.192674	0.00938266	3560	159.098	0.295511	0.0182286	3444.5	95.4019	1.39605	0.0307909	1.53722	152.004	99.4145	173.6		0.175081	0.553499
COG1 - 30.d	28	0.718276	0.0160852	3488.57	60.331	28.9399	2.72628	3452.85	87.8434	0.189141	0.00943746	3499.7	160.359	0.296374	0.0181417	3452.21	90.1175	1.39473	0.031279	1.14166	148.02	132.685	229.016		-0.0971537	0.796649
CQGN
CQGN - 1.d	28	0.331379	0.00761405	1844.64	36.779	5.38048	0.512343	1882.48	78.4251	0.0940554	0.0045631	1816.54	84.2181	0.115079	0.00724618	1881.32	118.315	3.01869	0.0703578	1.45435	281.973	196.108	170.913		0.336824	0.296202
CQGN - 2.d	28	0.337215	0.00828638	1872.62	39.9464	5.43737	0.524756	1887.82	82.3081	0.0939812	0.00459081	1815.14	84.7641	0.114233	0.007333	1873.07	124.176	2.94989	0.0683304	0.967742	184.912	192.997	172.646		0.25631	0.389431
CQGN - 3.d	28	0.331431	0.00786043	1844.8	38.0134	5.4537	0.519083	1891.55	81.3989	0.0933942	0.00449841	1804.36	83.1099	0.115493	0.00727002	1897.77	116.702	3.02499	0.071283	1.07904	241.824	226.574	197.021		0.33179	0.392474
CQGN - 4.d	28	0.324864	0.00756071	1812.99	36.8355	5.16523	0.501149	1847.73	77.909	0.0927388	0.00456171	1792.15	84.3464	0.112346	0.00732377	1836.36	125.612	3.07091	0.0714877	0.967965	172.185	178.416	155.111		0.13774	0.354414
CQGN - 5.d	28	0.331722	0.00790509	1846.19	38.2411	5.48873	0.527175	1896.24	82.9465	0.0905487	0.00454538	1751.53	84.0772	0.116271	0.00740849	1899.84	122.685	3.02258	0.0719229	1.05728	216.045	206.683	175.3		0.324524	0.251296
CQGN - 6.d	28	0.332119	0.00742711	1848.29	35.9307	5.34879	0.507679	1877.6	77.9894	0.0931465	0.00458196	1804.95	81.9293	0.114392	0.00724429	1869.4	111.124	3.01632	0.0674732	1.18993	321.466	271.946	238.97		0.308085	0.331287
CQGN - 7.d	28	0.335171	0.00780504	1862.93	37.6458	5.51235	0.529572	1899.88	83.4749	0.0929914	0.00484309	1796.54	89.511	0.117422	0.00771878	1907.22	117.712	2.983	0.0653969	1.19211	198.79	165.947	146.76		0.267058	0.233372
CQGN - 8.d	28	0.333072	0.00746695	1852.89	36.1002	5.45307	0.516797	1891.81	81.1632	0.0926568	0.00441323	1790.78	81.597	0.116304	0.00732041	1900.34	118.297	3.00779	0.0674657	0.945836	351.139	367.232	327.507		0.254264	0.326507
CQGN - 9.d	28	0.327779	0.00741747	1827.23	36.0478	5.35395	0.513257	1875.12	82.2343	0.092908	0.00437858	1795.47	80.9117	0.114852	0.00724398	1889.81	108.314	3.04559	0.0744536	0.880778	274.503	311.924	271.997		0.00239689	0.523617
CQGN - 10.d	28	0.337076	0.00864041	1871.81	41.59	5.53249	0.533582	1902.71	82.9608	0.0962748	0.00497707	1857.16	91.7963	0.11714	0.00784767	1900.05	123.874	2.9704	0.0783002	0.9846	133.199	136.907	126.819		0.383978	0.286877
CQGN - 11.d	28	0.335384	0.00709333	1864.2	34.2479	5.47184	0.515742	1895.22	81.0729	0.0943617	0.00467755	1822.1	86.3677	0.115588	0.00731734	1888.29	110.569	2.98492	0.0633252	0.919222	244.183	267.855	257.107		0.284121	0.287075
CQGN - 12.d	28	0.329137	0.00753085	1833.78	36.569	5.23163	0.50223	1862.4	88.1098	0.0932812	0.00478317	1801.98	88.4808	0.113172	0.00733129	1857.17	116.93	3.04466	0.0705096	1.07634	187.132	174.491	166.263		0.127582	0.331481
CQGN - 13.d	28	0.327976	0.00733847	1828.21	35.5983	5.28463	0.506503	1863.96	83.3186	0.0932857	0.00446846	1802.38	82.6707	0.114846	0.0073018	1876.98	111.595	3.04874	0.0653803	0.941559	294.048	313.373	305.325		-0.255906	0.664564
CQGN - 14.d	28	0.330283	0.00793893	1842.76	37.0954	5.25105	0.510062	1865.83	82.2168	0.0895792	0.00431406	1733.74	80.0023	0.113575	0.00747417	1871	121.402	3.02161	0.0674255	0.881351	180.906	205.562	196.937		0.109595	0.338985
CQGN - 15.d	28	0.326677	0.00738741	1825.28	37.6155	5.24194	0.511897	1859.11	80.3795	0.0943707	0.00472606	1822.21	87.2287	0.113069	0.00750619	1845.14	116.523	3.05456	0.068926	0.978446	172.18	178.059	176.184		0.238092	0.225026
CQGN - 16.d	28	0.332126	0.00824512	1848.02	39.9326	5.31407	0.515881	1878.54	74.0746	0.0920876	0.00451988	1780.12	83.6752	0.114572	0.0075565	1870.38	113.367	3.01377	0.0783323	0.937702	194.003	208.995	209.755		0.220435	0.388615
CQGN - 17.d	28	0.331283	0.0079205	1848.31	40.3104	5.49065	0.545903	1893.41	85.5306	0.0971196	0.00487022	1872.88	89.7281	0.118173	0.00781915	1925.77	123.361	3.01216	0.0780433	1.16391	194.879	168.308	175.146		0.0253621	0.466743
CQGN - 18.d	28	0.32966	0.00838638	1836	40.7273	5.19718	0.502185	1852.46	86.0268	0.0896006	0.00461484	1733.84	85.6332	0.113233	0.00759865	1838.82	123.074	3.01968	0.0734344	1.0538	146.253	136.883	136.177		0.318809	0.24873
CQGN - 19.d	28	0.342052	0.00808849	1899.45	37.5249	5.33464	0.51274	1871.8	82.2687	0.0955883	0.00481312	1844.65	88.8113	0.111856	0.00738431	1826.1	124.729	2.92445	0.0673766	1.1635	198.183	175.449	180.621		0.33369	0.147359
CQGN - 20.d	28	0.326967	0.00713509	1823.38	34.5975	5.21261	0.492833	1853.42	80.1426	0.0946369	0.00455984	1827.31	84.2568	0.113828	0.00725985	1854.68	115.969	3.06285	0.0660128	1.20897	318.348	264.844	280.633		0.300268	0.269133
CQGN - 21.d	28	0.325185	0.0072563	1814.66	35.2846	5.24959	0.500226	1858.87	81.0786	0.0911152	0.00428137	1762.3	79.3232	0.116163	0.00735634	1903.78	124.333	3.07542	0.0707527	0.914279	305.034	336.971	346.903		0.273481	0.283172
CQGN - 22.d	28	0.332283	0.00768309	1848.99	37.2019	5.15685	0.493315	1845.94	84.0827	0.0912821	0.0043858	1765.3	81.1486	0.112254	0.00712903	1830.06	114.737	3.01625	0.0702903	0.943493	223.584	237.002	241.858		0.3379	0.228709
CQGN - 23.d	28	0.333948	0.00798542	1856.94	38.5654	5.25158	0.509715	1864.95	88.7407	0.0892092	0.00461771	1726.56	85.5498	0.113406	0.00743521	1859.86	129.955	3.00259	0.0716988	1.02961	130.28	126.952	125.342		0.285501	0.219643
CQGN - 24.d	28	0.33453	0.00725337	1860.02	35.0546	5.20167	0.495955	1850.96	81.7406	0.0921997	0.00439325	1782.32	81.3059	0.112745	0.00723709	1836.6	117.587	2.99343	0.0652802	0.858276	229.653	268.231	274.904		0.299011	0.342745
CQGN - 25.d	28	0.333522	0.00764278	1858.33	35.3902	5.28107	0.507935	1869.49	76.6235	0.0939487	0.00463029	1814.5	85.5225	0.114299	0.00719882	1869.32	121.499	2.99795	0.0656182	1.18803	259.905	215.341	228.247		-0.000944398	0.524774
CQGN - 26.d	28	0.327632	0.00776173	1826.39	37.7111	5.2167	0.503889	1862.86	79.2328	0.0925507	0.00454055	1788.68	83.9973	0.114905	0.00750048	1868.77	120.405	3.06013	0.0731029	1.09483	176.324	158.591	161.259		0.223265	0.324761
CQGN - 27.d	28	0.333593	0.0077743	1855.3	37.551	5.26897	0.504187	1861.61	81.6275	0.0916017	0.00453131	1771.09	83.9145	0.114345	0.00738425	1867.35	121.738	2.99847	0.072349	1.14938	198.384	171.995	170.72		0.279578	0.299837
CQGN - 28.d	28	0.336509	0.00737636	1869.54	35.549	5.37274	0.509037	1879.11	81.3505	0.0922433	0.00443244	1783.09	82.0163	0.114735	0.00723489	1875.07	118.864	2.97619	0.064935	0.877726	339.673	385.009	369.37		0.314914	0.284123
CQGN - 29.d	28	0.334953	0.00748989	1861.98	36.2025	5.28829	0.503259	1865.2	81.7325	0.0915653	0.00438626	1770.56	81.2081	0.114391	0.00729449	1863.61	116.237	2.99086	0.0675986	0.965849	291.269	298.547	285.01		0.254822	0.30353
CQGN - 30.d	28	0.328991	0.00768964	1833.02	37.3038	5.24864	0.498214	1863.82	80.1956	0.0915213	0.00446116	1769.67	82.6038	0.115825	0.00762504	1897.2	110.66	3.04686	0.0715145	0.979645	146.991	150.076	138.162		0.229318	0.345719
CTEM
CTEM - 1.d	28	0.0673847	0.00185127	420.315	11.1787	0.495592	0.0584448	415.678	38.2601	0.0220016	0.00137382	439.764	27.175	0.0528177	0.00468694	292.572	220.766	14.9159	0.409783	1.82521	251.878	136.708	29.4063		0.0553016	0.243195
CTEM - 2.d	28	0.066287	0.00156549	413.716	9.46607	0.509369	0.0524041	416.599	35.1497	0.0214244	0.00132341	428.355	26.197	0.0561889	0.00428822	413.419	177.021	15.0857	0.340614	2.22553	337.607	152.098	31.1912		0.108672	0.179872
CTEM - 3.d	28	0.0652221	0.00175379	407.25	10.6091	0.524954	0.0562539	426.26	37.5196	0.0208418	0.00127244	416.834	25.1828	0.0563477	0.00470096	511.702	188.998	15.3649	0.421325	1.61023	295.245	183.847	35.9518		0.406646	-0.144666
CTEM - 4.d	28	0.0682032	0.0017476	425.271	10.5449	0.50948	0.0581258	418.377	40.2478	0.0217142	0.00157422	434.002	31.1262	0.0537627	0.0047936	320.046	207.511	14.6406	0.403867	2.08279	244.797	118.633	24.265		0.147301	0.119139
CTEM - 5.d	15.208	0.0657519	0.00179191	410.479	10.8398	0.490051	0.0600684	402.537	40.631	0.019837	0.00146651	396.932	29.0602	0.053908	0.00528064	335.302	244.7	15.1795	0.379335	1.87578	324.169	170.993	32.7672		0.0427615	0.175815
CTEM - 6.d	18.43	0.0665257	0.00178397	415.152	10.7852	0.443915	0.0505397	371.266	35.5302	0.0211849	0.0014613	423.619	28.927	0.0483776	0.00451483	108.155	230.188	15.0181	0.380068	2.66218	296.504	111.038	21.7364		0.376034	-0.143483
CTEM - 7.d	28	0.06592	0.00164209	411.487	9.93016	0.484892	0.0540292	398.782	37.0843	0.0222925	0.00164962	445.414	32.6181	0.0531406	0.00466468	312.518	197.684	15.1806	0.363857	3.04144	288.936	94.5946	19.9255		0.225554	0.0848537
CTEM - 8.d	28	0.066016	0.00154719	412.079	9.35638	0.515178	0.0536221	420.258	36.3052	0.0215177	0.00118284	430.246	23.4018	0.0567176	0.00425915	471.303	161.818	15.1516	0.371184	2.07834	475.949	228.699	46.0275		0.171311	0.178389
CTEM - 9.d	28	0.0668215	0.001801	416.918	10.8867	0.50961	0.0611765	413.85	41.3738	0.0224794	0.00159942	449.132	31.5982	0.056036	0.00561696	445.324	209.613	15.0374	0.413002	1.66791	148.121	87.3498	18.5642		0.124669	0.1262
CTEM - 10.d	28	0.0652206	0.00178873	407.236	10.818	0.505436	0.0539053	415.952	37.8027	0.0228804	0.00156152	457.076	30.8586	0.0551095	0.00427187	416.108	182.17	15.3191	0.41281	1.89263	227.166	120.557	25.7229		0.0598156	0.327395
CTEM - 11.d	28	0.065488	0.00156885	408.881	9.49308	0.50108	0.0534131	410.454	36.2301	0.0210698	0.00126627	421.351	25.0693	0.055334	0.00463582	395.566	190.291	15.2773	0.356041	1.51421	233.863	156.021	29.7445		0.183762	0.0760711
CTEM - 12.d	24.774	0.0660981	0.00168903	412.564	10.2147	0.471039	0.0552119	398.068	42.086	0.0216468	0.00127101	432.785	25.1539	0.0520582	0.00494357	245.189	231.156	15.0805	0.380285	1.49315	257.218	173.078	34.0598		0.0520786	0.158589
CTEM - 13.d	28	0.0648032	0.00157679	404.735	9.54614	0.477754	0.0537313	397.029	36.187	0.0210828	0.00123646	421.619	24.4705	0.0529575	0.00446848	291.611	209.909	15.4387	0.362733	1.61229	275.173	170.078	32.6388		0.168136	0.118164
CTEM - 14.d	28	0.065006	0.00176185	405.94	10.6654	0.532944	0.0622045	429.804	41.3388	0.0199819	0.001556	399.69	30.8237	0.0578218	0.00517362	504.529	197.489	15.3014	0.394427	2.37079	237.149	100.848	17.7578		0.134477	0.167745
CTEM - 15.d	28	0.0655173	0.00146939	409.07	8.89058	0.494746	0.0541361	405.76	36.7658	0.0208664	0.00120445	417.343	23.8409	0.053926	0.00448637	314.378	200.405	15.2282	0.375864	2.16913	314.86	146.33	27.7535		0.0767387	0.163561
CTEM - 16.d	28	0.065871	0.00157718	411.198	9.53379	0.510391	0.0529014	422.404	35.7271	0.0208989	0.00124141	417.975	24.5727	0.0553799	0.00417061	434.69	172.406	15.2222	0.359962	2.30569	444.868	190.622	36.5332		0.0882274	0.178763
CTEM - 17.d	28	0.0657895	0.00157221	410.706	9.51519	0.519326	0.0558104	430.837	38.4457	0.0209992	0.0012025	419.972	23.8028	0.057226	0.00459156	522.791	161.262	15.1604	0.364929	1.59169	315.068	198.355	37.6339		0.0600494	0.261094
CTEM - 18.d	28	0.0651224	0.00173715	406.648	10.5101	0.533236	0.063039	429.744	41.6696	0.0220881	0.0014898	441.432	29.4667	0.0576195	0.00516761	580.607	219.926	15.3363	0.4063	1.70118	161.963	95.7928	19.0131		-0.0885363	0.26653
CTEM - 19.d	28	0.0671841	0.00178094	419.112	10.7615	0.49958	0.0613523	416.546	42.2498	0.0229395	0.00173639	458.174	34.3022	0.0546661	0.00584206	437.362	230.546	14.9044	0.385014	2.68771	183.439	68.758	14.1027		0.209719	-0.0225677
CTEM - 20.d	28	0.0661984	0.00151267	413.186	9.15038	0.503763	0.0547363	412.308	37.1127	0.021213	0.00114337	424.224	22.6303	0.0543577	0.00416587	376.485	173.086	15.1062	0.366779	2.1579	473.799	219.384	41.0344		0.154411	0.132535
CTEM - 21.d	28	0.0658976	0.001416	411.377	8.56303	0.532936	0.0546432	432.275	36.5123	0.0217985	0.00115185	435.814	22.7818	0.0580513	0.00430252	540.028	160.029	15.168	0.341785	1.54791	437.228	283.845	54.9493		0.100615	0.16986
CTEM - 22.d	28	0.0648005	0.0016463	404.71	9.96557	0.520786	0.0615215	425.099	42.5385	0.020155	0.00123022	405.925	23.3524	0.0573636	0.00535305	522.464	195.273	15.446	0.410626	1.55661	269.751	172.249	31.5448		0.09757	0.194882
CTEM - 23.d	28	0.0649453	0.00155982	405.597	9.44564	0.543442	0.0578333	438.514	38.2125	0.0214476	0.00120737	428.851	23.8893	0.0601991	0.00472102	583.137	165.659	15.4046	0.392125	2.21218	309.128	139.621	26.2777		0.143914	0.182226
CTEM - 24.d	28	0.0667273	0.00161991	416.372	9.78786	0.526084	0.0541861	427.702	35.9575	0.0213304	0.00114775	426.548	22.7095	0.0564095	0.0041131	476.684	166.978	14.9864	0.341722	1.65602	403.82	244.677	46.4076		0.0996918	0.26649
CTEM - 25.d	28	0.0652491	0.00155586	407.437	9.41315	0.464705	0.048005	388.911	31.6133	0.0219817	0.00139437	439.362	27.5796	0.0513769	0.00403699	278.16	183.361	15.333	0.378012	2.77844	360.561	131.31	25.071		0.251403	0.00945136
CTEM - 26.d	28	0.0660659	0.00146457	412.39	8.85698	0.539035	0.0548574	439.008	34.7105	0.0214149	0.00114541	428.223	22.6544	0.0585654	0.00442106	525.996	164.487	15.1332	0.352044	1.50209	518.133	345.737	65.4054		0.29813	-0.0503952
CTEM - 27.d	28	0.0654631	0.00170471	408.715	10.3113	0.521224	0.0547356	427.235	38.3463	0.0210408	0.001427	420.724	28.2454	0.0568602	0.00445529	469.198	190.755	15.3383	0.399718	2.24445	243.561	109.11	20.4187		0.157872	0.232641
CTEM - 28.d	28	0.0661385	0.00171842	412.799	10.387	0.519908	0.0635922	429.39	42.7988	0.0222795	0.00139073	445.256	27.4949	0.0581126	0.00619357	509.497	222.027	15.1392	0.377536	1.58417	192.715	122.403	24.2724		0.226967	-0.0119182
CTEM - 29.d	28	0.0651287	0.00167512	406.694	10.1375	0.509834	0.0578404	415.208	38.678	0.021595	0.00130731	431.739	25.8483	0.0547558	0.00492341	408.935	198.458	15.3701	0.380218	1.74127	254.219	145.614	27.0301		0.332817	-0.0892152
CTEM - 30.d	28	0.0658355	0.00178544	410.957	10.7935	0.550261	0.0674337	439.883	44.2986	0.022088	0.00171609	441.341	33.9239	0.0586561	0.00562389	454.307	243.508	15.2624	0.410342	2.43124	162.664	67.5988	12.9438		-0.0652571	0.311679
NOG1
NOG1 - 1.d	28	0.711691	0.0175908	3469.66	68.4892	31.1981	2.95269	3526.02	96.2099	0.191093	0.00906504	3533.63	153.859	0.310362	0.0191888	3523.75	90.4926	1.40634	0.0354018	0.997671	111.06	114.631	192.821		0.418767	0.513299
NOG1 - 2.d	28	0.710008	0.016641	3457.15	62.5783	30.9137	2.91881	3519.62	99.5124	0.194617	0.0091625	3593.42	155.195	0.312787	0.0192518	3532.63	94.5345	1.40916	0.0336993	0.987644	154.703	158.702	275.646		0.107074	0.711118
NOG1 - 3.d	22.492	0.703638	0.0180089	3440.07	70.8199	30.877	2.98752	3511.79	93.8524	0.229192	0.0125667	4188.65	216.199	0.312531	0.0198095	3529.56	98.0159	1.41767	0.036027	1.09217	94.6987	91.3128	177.375		0.240889	0.484098
NOG1 - 4.d	28	0.701469	0.0157344	3425.22	59.5379	30.9409	2.92594	3515.56	92.3129	0.191326	0.00930602	3537.18	157.88	0.317836	0.0194657	3557.7	94.0984	1.42816	0.0318899	1.38734	165.505	123.518	210.613		-0.086805	0.789805
NOG1 - 5.d	28	0.721269	0.0178657	3506.02	69.7625	31.2913	2.9808	3528.98	90.2691	0.197689	0.00952821	3644.93	160.678	0.313153	0.0193045	3537.33	91.576	1.38417	0.0371432	0.980759	127.932	134.298	240.194		0.0952699	0.774643
NOG1 - 6.d	28	0.712076	0.0168723	3464.84	63.5347	31.0124	2.91618	3521.26	99.9903	0.192383	0.00948407	3554.87	161.144	0.315168	0.0193196	3550.53	93.1785	1.40798	0.0334618	1.3213	137.217	105.032	183.517		0.0285071	0.722417
NOG1 - 7.d	28	0.720081	0.0187688	3494.03	70.4969	31.1256	2.96865	3527.36	94.7098	0.197487	0.010332	3640.06	174.032	0.317827	0.0195986	3560.3	99.1669	1.3861	0.0334502	1.17685	95.2198	82.9644	149.343		0.165961	0.705823
NOG1 - 8.d	28	0.705554	0.0169228	3440.16	63.9482	30.7802	2.92005	3512.99	90.0544	0.193035	0.00963225	3565.72	162.772	0.313336	0.0192807	3535.26	95.3989	1.41788	0.0355433	1.06032	134.243	132.377	226.51		0.0563119	0.761237
NOG1 - 9.d	28	0.700937	0.015374	3423.37	58.188	30.1661	2.85673	3490.41	93.988	0.196939	0.00959569	3632.1	162.095	0.311281	0.0190814	3525.4	95.1597	1.42635	0.0324222	1.55512	184.527	121.65	220.222		-0.195318	0.777551
NOG1 - 10.d	28	0.71175	0.0168598	3463.62	63.5575	30.8944	2.92897	3513.76	93.7549	0.197695	0.00983579	3644.5	165.703	0.314538	0.019426	3540.91	94.9947	1.4052	0.0319795	1.17453	102.87	88.4622	159.88		-0.0149063	0.757194
NOG1 - 11.d	28	0.716778	0.0167726	3482.62	62.8829	31.4086	2.96309	3532.77	89.2208	0.195135	0.0093053	3601.99	157.406	0.317699	0.0195741	3556.52	94.7517	1.39846	0.0325963	1.28995	143.96	111.608	199.403		0.356483	0.642233
NOG1 - 12.d	28	0.731928	0.0200207	3537.74	74.1709	31.677	3.03483	3540.6	97.1293	0.20035	0.00986271	3689.4	165.881	0.314146	0.0193452	3542.14	91.0129	1.37298	0.0368831	1.6929	152.682	90.8441	171.331		0.0697401	0.854508
Linked selection - 13.d	30.212	0.722332	0.0173086	3503.23	64.8057	32.169	3.04842	3553.62	92.6324	0.202394	0.0101192	3735.79	176.905	0.322035	0.0198919	3580.26	91.6106	1.37834	0.0319488	1.68354	117.741	72.335	131.685		0.111864	0.86481
NOG1 - 14.d	28	0.703984	0.016302	3434.5	61.6865	31.0087	2.91815	3518.21	93.5646	0.195123	0.00924204	3601.88	156.382	0.316921	0.0196271	3552.28	96.2309	1.41802	0.0306527	1.21031	153.295	128.01	231.094		0.320357	0.508419
NOG1 - 15.d	28	0.701351	0.0157037	3424.79	59.4717	30.6464	2.8856	3510.55	93.0587	0.191917	0.00890288	3547.92	151.198	0.316511	0.0193787	3551.25	94.5339	1.42838	0.0319583	0.921663	205.24	227.58	401.291		0.233749	0.69759
NOG1 - 16.d	28	0.703158	0.015811	3431.6	59.895	30.9966	2.9299	3517.35	93.6339	0.195469	0.00949237	3607.34	160.741	0.318002	0.0196054	3557.93	95.0622	1.42206	0.0334899	1.09674	114.188	108.653	193.303		0.178054	0.660934
NOG1 - 17.d	28	0.718388	0.0173846	3488.38	65.2569	30.9008	2.93864	3513.63	94.2629	0.191739	0.00930306	3554.06	151.785	0.313034	0.0193527	3533.45	94.7076	1.39605	0.0339741	1.14815	125.819	110.386	199.328		0.195357	0.748924
NOG1 - 18.d	28	0.715414	0.0159713	3477.85	60.2137	31.3256	2.96003	3527.79	92.6458	0.192914	0.00942982	3564.01	159.93	0.317279	0.0195091	3559.89	93.9894	1.39171	0.0325345	1.37886	178.169	130.758	239.235		0.196387	0.715332
NOG1 - 19.d	28	0.708995	0.0165554	3453.37	62.0978	30.8323	2.91657	3517.37	92.1801	0.195137	0.00936315	3601.92	157.879	0.31602	0.0194993	3548.23	95.1816	1.41082	0.0334222	1.66484	148.436	89.0027	165.799		0.104367	0.705642
NOG1 - 20.d	28	0.717908	0.0174231	3492.51	63.2603	31.3037	2.96188	3526.94	92.0393	0.193955	0.00992748	3594.45	175.134	0.316716	0.0195026	3554.53	98.2548	1.39375	0.032866	1.66189	154.445	93.8331	171.445		0.225159	0.709232
NOG1 - 21.d	28	0.709655	0.0160639	3456.08	60.5217	30.7255	2.89132	3511.35	96.1465	0.198505	0.00968164	3658.49	163.102	0.318019	0.0195647	3560.82	91.7164	1.40938	0.0328626	1.87192	183.755	100.162	189.33		0.197868	0.662138
NOG1 - 22.d	28	0.707416	0.0158745	3447.7	60.1219	30.6561	2.88421	3509.26	88.0265	0.193067	0.00903857	3567.28	153.043	0.31531	0.0192427	3545.66	94.1357	1.41049	0.0321052	0.896555	178.496	199.119	365.987		0.217334	0.737893
NOG1 - 23.d	28	0.721848	0.0170029	3501.56	63.7403	31.0335	2.92671	3518.74	92.8447	0.199173	0.00970956	3669.76	163.329	0.315988	0.0193474	3548.66	94.8637	1.38881	0.0329979	1.5191	177.521	118.825	219.809		0.245886	0.724588
NOG1 - 24.d	28	0.71702	0.017207	3483.32	64.3983	30.8426	2.91456	3512.44	94.2539	0.194906	0.0100282	3596.81	169.763	0.314003	0.0193071	3541.21	91.4027	1.39847	0.0331641	1.78814	181.794	102.252	186.372		-0.00348319	0.88957
NOG1 - 25.d	28	0.713434	0.01742	3469.71	65.2687	30.3805	2.87407	3497.47	93.1643	0.190755	0.00905184	3527.88	153.961	0.312908	0.0192655	3533.13	95.3589	1.40265	0.0325263	1.02025	146.694	145.298	261.656		0.177646	0.756519
NOG1 - 26.d	28	0.709515	0.0165949	3455.3	62.6272	30.4611	2.87675	3503.02	88.9677	0.192647	0.00987464	3558.68	166.998	0.317518	0.0195725	3555.59	94.6633	1.40933	0.0314584	1.69051	139.212	83.337	151.348		0.0445696	0.752986
NOG1 - 27.d	28	0.717373	0.0162191	3485.11	61.0624	30.482	2.89865	3500.17	93.826	0.189682	0.0090208	3509.65	153.242	0.311705	0.0193357	3526.52	96.1436	1.38733	0.0327643	1.10023	140.068	126.578	231.663		0.0372081	0.718958
NOG1 - 28.d	28	0.718682	0.0154468	3490.38	58.0282	30.5486	2.87466	3508.13	93.6374	0.188126	0.00899003	3483.13	153.094	0.312853	0.0192337	3533.08	94.6627	1.39324	0.0302089	1.19861	199.349	167.671	290.029		0.176622	0.619304
NOG1 - 29.d	28	0.694761	0.0155158	3399.8	58.8986	29.9751	2.82607	3484.66	93.3887	0.188323	0.00941457	3485.76	160.292	0.313951	0.0193597	3538.1	96.0491	1.44186	0.031932	1.62113	151.66	95.5655	166.932		0.177374	0.6436
NOG1 - 30.d	28	0.734983	0.0168803	3556.89	65.5351	31.2144	2.94147	3524.53	92.6707	0.204722	0.0104705	3762.1	175.174	0.311422	0.0191381	3526	94.9828	1.36059	0.0323544	1.72239	132.515	85.1112	158.959		0.158139	0.741303
NQGN
NQGN - 1.d	28	0.333572	0.00747491	1855.31	36.1446	5.15727	0.489476	1846.67	76.9386	0.099056	0.00475534	1908.73	87.4239	0.113537	0.00710767	1852.28	112.208	2.99231	0.0623889	0.957292	245.328	258.746	235.578		0.102532	0.483342
NQGN - 2.d	28	0.329012	0.00739936	1833.23	35.9579	4.96214	0.472409	1814.14	84.1238	0.0953962	0.00483373	1841.07	89.235	0.110317	0.00693049	1805.58	119.924	3.04513	0.0697027	1.11085	186.057	168.542	147.24		0.0915498	0.448657
NQGN - 3.d	28	0.330423	0.00717191	1840.15	34.7465	5.09826	0.486652	1833.85	79.9943	0.0964325	0.00458959	1860.48	84.5843	0.112702	0.00706133	1838.79	113.38	3.03068	0.0658479	1.33346	259.028	198.316	178.904		-0.0729357	0.524615
NQGN - 4.d	28	0.335097	0.00796807	1866.49	40.2187	5.0875	0.48853	1834.29	83.6918	0.0980551	0.00461213	1890.42	84.9372	0.110238	0.00702467	1801.88	119.262	2.98523	0.0732557	1.13873	236.693	205.523	188.516		0.266739	0.437976
NQGN - 5.d	28	0.332104	0.00781194	1848.08	37.8009	5.14824	0.488801	1842.54	80.8839	0.0967898	0.00461318	1867.06	85.067	0.112319	0.00716526	1830.47	116.909	3.00521	0.0765988	0.986537	224.13	227.121	206.432		0.427445	0.245474
NQGN - 6.d	28	0.324975	0.0076047	1813.52	36.9169	5.09038	0.492155	1831.41	82.7162	0.0957409	0.0045675	1847.72	84.2221	0.112719	0.00728461	1847.88	117.802	3.07071	0.0705376	0.994156	155.542	159.092	140.233		0.0458939	0.46944
NQGN - 7.d	28	0.326889	0.00708372	1823.02	34.4238	5.02517	0.47959	1821.59	81.2961	0.0960971	0.00443944	1854.43	81.7927	0.111795	0.00708694	1822.8	115.044	3.05792	0.0634167	1.03765	268.902	260.463	235.627		0.0971377	0.366184
NQGN - 8.d	28	0.332429	0.00757069	1849.74	36.6094	5.20651	0.497106	1851.69	80.8273	0.0958378	0.00476552	1849.31	87.7969	0.11296	0.00712596	1853.94	113.043	3.01424	0.0686079	0.936644	176.497	188.373	170.973		0.209788	0.410253
NQGN - 9.d	28	0.330386	0.00782266	1839.74	37.9365	5.17708	0.500322	1849.65	86.0278	0.093811	0.00487879	1811.69	90.1665	0.113669	0.00748809	1871.27	114.088	3.03462	0.072634	1.11259	147.367	132.804	115.716		0.0968184	0.36209
NQGN - 10.d	28	0.337903	0.00838564	1875.9	40.3863	5.29778	0.514172	1868.53	85.8279	0.0990884	0.00503289	1909.03	92.4954	0.113853	0.00750858	1857.94	122.644	2.9616	0.0706493	1.46299	183.236	125.215	116.25		0.18187	0.364326
NQGN - 11.d	28	0.330489	0.00773937	1840.27	37.4705	5.2554	0.505566	1862.82	78.3822	0.0976719	0.00486726	1883.08	89.5733	0.115107	0.00746404	1879.16	121.383	3.03308	0.0708209	1.07851	155.6	145.4	136.019		0.197164	0.407505
NQGN - 12.d	28	0.329232	0.00828825	1838.21	38.6223	5.23563	0.508117	1854.95	83.5877	0.0960076	0.00533669	1851.82	98.4474	0.112891	0.00755165	1842.58	129.7	3.02266	0.0806992	1.43879	95.2728	65.6306	60.261		0.220223	0.294058
NQGN - 13.d	28	0.3229	0.00783729	1803.32	38.164	5.02042	0.484685	1819.86	81.5699	0.0938887	0.00502675	1812.97	92.9417	0.111128	0.00721583	1816.56	113.171	3.10601	0.0752916	1.69988	117.745	68.5011	61.4321		0.0864861	0.427029
NQGN - 14.d	28	0.334908	0.00723154	1861.85	34.9131	5.28761	0.499471	1865.73	80.7809	0.0975387	0.0044643	1881.04	82.2157	0.113653	0.00712994	1853.78	114.951	2.98564	0.0664297	1.25223	476.782	380.585	353.017		0.433392	0.138842
NQGN - 15.d	28	0.331543	0.00797494	1845.3	38.6011	5.15871	0.501968	1845.91	80.6958	0.0981255	0.00491435	1891.4	90.4406	0.113184	0.00734267	1849.14	122.679	3.0187	0.0747473	1.11974	185.745	165.265	152.858		0.0957541	0.394631
NQGN - 16.d	28	0.334478	0.00850248	1859.3	41.1144	5.22942	0.503462	1854.71	81.8628	0.0985229	0.00473717	1898.92	87.0577	0.111614	0.00719376	1824.7	113.322	2.99259	0.0740933	1.1497	150.757	131.054	121.999		0.283164	0.471433
NQGN - 17.d	28	0.341251	0.00756151	1892.34	36.2949	5.46305	0.51782	1893.38	81.9747	0.0987974	0.00481727	1903.9	88.6385	0.114414	0.00719976	1870.63	109.433	2.93521	0.0645048	1.14917	267.471	233.48	220.024		0.208136	0.453834
NQGN - 18.d	28	0.340322	0.00777761	1887.79	37.454	5.20795	0.495908	1854.64	83.8106	0.0981533	0.00473506	1892.11	87.1241	0.110241	0.00697804	1797.53	115.141	2.9336	0.0634541	1.35569	279.779	209.474	194.374		0.162383	0.419524
NQGN - 19.d	28	0.336107	0.00712822	1867.68	34.3477	5.29568	0.501327	1866.86	80.5659	0.0953711	0.00465825	1840.79	85.9977	0.112652	0.00709638	1837.34	114.861	2.96941	0.063072	2.46349	448.18	210.843	190.35		0.208268	0.378289
NQGN - 20.d	28	0.33776	0.00747507	1878.79	37.6989	5.26921	0.507398	1864.74	86.3515	0.098623	0.00482532	1900.67	88.7692	0.112584	0.00730719	1832.81	117.317	2.95459	0.0702651	1.327	198.665	149.744	143.832		0.00564708	0.419524
NQGN - 21.d	28	0.336267	0.00707229	1868.48	34.0941	5.35357	0.503167	1876.72	79.9625	0.0980088	0.00458008	1889.6	84.3043	0.114102	0.00701796	1863.14	110.975	2.97687	0.062349	1.99913	741.859	384.123	356.236		0.137544	0.532655
NQGN - 22.d	28	0.340829	0.00696676	1890.51	33.5263	5.44159	0.515442	1890.09	81.0603	0.0975281	0.0045632	1880.74	84.0551	0.113523	0.00701782	1857.46	117.196	2.92881	0.0656363	1.41726	535.581	378.008	350.76		-0.184646	0.571339
NQGN - 23.d	28	0.338893	0.00733678	1881.06	35.2979	5.43435	0.521891	1890.76	79.226	0.0968122	0.00462077	1867.47	85.1059	0.115067	0.00737505	1873.68	116.07	2.94608	0.0633559	1.18732	325.088	273.129	249.213		-0.0038207	0.427877
NQGN - 24.d	28	0.338703	0.0082335	1879.82	39.6598	5.28053	0.527599	1873.78	87.5601	0.0990898	0.00519259	1908.88	95.4479	0.11161	0.00788384	1835.44	124.561	2.93949	0.0740546	1.54284	107.932	68.7153	64.3514		0.211334	0.244024
NQGN - 25.d	28	0.33523	0.00742213	1866.41	34.2436	5.37927	0.513696	1879.46	82.4554	0.0947256	0.00465399	1828.86	85.8638	0.114698	0.00726251	1869.19	116.668	2.97594	0.0601123	1.34812	321.42	236.419	209.669		0.233762	0.342434
NQGN - 26.d	28	0.335098	0.00868696	1862.23	41.9325	5.34805	0.519273	1876.74	79.5542	0.0961053	0.00487928	1854.14	89.9549	0.113721	0.00729515	1852.43	115.156	2.99623	0.0778657	1.66292	168.107	100.733	90.0544		-0.0543955	0.591446
NQGN - 27.d	28	0.330208	0.00840703	1838.66	40.7538	5.32544	0.514376	1869.95	82.3245	0.0926632	0.00454402	1790.77	83.9836	0.115175	0.00723591	1877.72	113.803	3.03087	0.0742687	0.860173	195.718	228.324	195.959		0.060756	0.646412
NQGN - 28.d	28	0.334191	0.00755691	1858.28	36.5195	5.36643	0.515182	1876.95	83.0422	0.0948886	0.00456728	1831.96	84.2664	0.115509	0.00733269	1881.61	116.936	2.98616	0.0621455	0.918616	232.315	259.664	229.129		0.104051	0.411516
NQGN - 29.d	28	0.331224	0.0080577	1843.72	38.9922	5.28153	0.515553	1861.82	85.0658	0.0955796	0.00561404	1843.58	103.468	0.112452	0.00770001	1832.22	129.935	3.01983	0.0772807	1.45056	119.919	83.4443	74.5653		0.45681	0.0890457
NQGN - 30.d	28	0.335738	0.0075846	1865.75	36.5465	5.40987	0.532318	1885.66	82.346	0.0963436	0.00497426	1858.44	91.6477	0.114781	0.00764106	1872.45	116.221	2.96715	0.0740414	1.14832	155.73	136.948	122.673		-0.18144	0.540457
NTEM
NTEM - 1.d	28	0.0649711	0.00180031	405.724	10.9014	0.524944	0.0601566	424.946	40.2478	0.0198593	0.00135985	397.333	26.94	0.0569769	0.00482238	553.012	191.374	15.3582	0.390681	1.86566	170.026	94.5298	16.4339		-0.0568188	0.432586
NTEM - 2.d	28	0.066979	0.0023934	417.779	14.4403	0.467357	0.0710937	379.789	48.864	0.0208882	0.00236775	417.252	46.8293	0.0508677	0.00727896	114.751	353.928	15.0341	0.550042	1.92284	79.4726	42.7146	7.6282		0.481753	-0.172557
NTEM - 3.d	28	0.0677614	0.00172219	422.607	10.404	0.531203	0.0573492	430.22	38.356	0.0220497	0.00137026	440.717	27.0982	0.0555387	0.00424922	417.047	201.387	14.7274	0.378138	1.98019	283.619	149.827	28.182		0.0519116	0.28436
NTEM - 4.d	28	0.066578	0.00159782	415.472	9.65257	0.491392	0.0514701	404.192	35.4603	0.0211893	0.00157997	423.606	31.2623	0.0534436	0.00436107	344.559	202.454	15.0611	0.357658	2.72021	281.963	106.239	19.92		0.33281	-0.0735747
NTEM - 5.d	28	0.0661408	0.00181103	412.801	10.9519	0.500341	0.0609874	411.578	42.3221	0.0214012	0.00137942	427.877	27.2924	0.0551811	0.00566614	330.145	240.125	15.1964	0.421839	1.76939	207.206	119.04	21.9587		0.267543	-0.052949
NTEM - 6.d	28	0.064592	0.00168802	403.442	10.229	0.501412	0.0611143	411.996	39.9225	0.0202338	0.001463	404.721	28.9774	0.0564878	0.0053988	406.798	225.883	15.5484	0.420466	1.89686	225.284	121.198	22.1779		0.2543	0.00383482
NTEM - 7.d	17.467	0.0663907	0.0022605	414.295	13.6766	0.474038	0.0653071	398.895	39.6119	0.0221853	0.00244218	443.127	48.3069	0.0545172	0.00726816	312.136	254.56	15.1623	0.537535	2.18392	176.558	82.4161	15.6701		0.264245	0.0935257
NTEM - 8.d	28	0.0639284	0.0019323	399.389	11.6937	0.4851	0.0567008	398.093	38.5007	0.0209249	0.00145006	418.418	28.7218	0.054191	0.00515901	370.617	219.829	15.691	0.483352	1.932	163.25	86.9949	16.4441		0.266772	0.0606123
NTEM - 9.d	28	0.067047	0.0019283	418.263	11.6518	0.476859	0.0703183	393.219	47.0295	0.0228073	0.00245075	455.185	48.363	0.0516266	0.00682625	247.666	294.788	14.7989	0.431879	3.51487	105.423	30.2669	5.97769		0.0242861	0.199542
NTEM - 10.d	19.856	0.0675906	0.00171519	421.59	10.3479	0.459219	0.0600031	385.035	44.2457	0.0216566	0.00167765	432.887	33.1868	0.0499801	0.0055733	81.4246	294.357	14.7857	0.389154	1.70039	171.111	102.45	19.9975		0.138176	0.12387
NTEM - 11.d	28	0.0679409	0.00191774	423.665	11.5722	0.463	0.0559223	382.316	39.7346	0.0228367	0.00207989	455.976	41.0722	0.0482733	0.00479442	127.597	261.376	14.7099	0.446077	3.19286	178.574	57.8126	11.8078		0.370275	-0.0531327
NTEM - 12.d	28	0.0653943	0.00180859	408.284	10.9429	0.459628	0.0576085	383.515	41.8628	0.0207191	0.00154703	414.306	30.5954	0.0508599	0.00541021	188.847	255.554	15.3723	0.42786	1.97361	140.331	72.169	13.5172		0.226834	-0.00544132
NTEM - 13.d	28	0.0645466	0.00192982	404.579	11.2117	0.497856	0.0622732	405.214	41.9769	0.0216816	0.00182021	433.25	36.0169	0.0558344	0.00581719	385.711	238.872	15.4211	0.469793	2.89295	170.667	60.2528	12.228		0.211877	0.0713701
NTEM - 14.d	28	0.0663072	0.00207742	413.769	12.5667	0.443761	0.0575128	377.788	36.6782	0.0199102	0.00188632	398.127	37.3287	0.0492092	0.00547882	53.7658	264.982	15.0841	0.451256	3.24616	119.328	38.5828	7.24924		0.143263	0.122608
NTEM - 15.d	28	0.066529	0.00181916	415.148	10.9979	0.525199	0.0592414	429.309	37.7631	0.0221645	0.00195679	442.743	38.6858	0.0560689	0.00527479	435.096	189.784	15.0549	0.398716	3.33293	240.231	73.0195	14.5716		0.367863	-0.104782
NTEM - 16.d	28	0.065891	0.00161457	411.314	9.76542	0.504702	0.066694	429.197	45.2587	0.0209909	0.00166537	419.641	32.9697	0.0567771	0.00639012	403.332	253.118	15.1792	0.396845	1.78865	144.044	82.2764	15.98		-0.215044	0.432509
NTEM - 17.d	28	0.0659048	0.00198026	411.35	11.9801	0.470786	0.0655094	389.925	43.4956	0.0217301	0.00180727	434.217	35.735	0.0514098	0.00606512	144.717	285.282	15.2825	0.469623	3.02846	155.995	53.0309	10.3615		-0.01612	0.205695
NTEM - 18.d	28	0.0651704	0.00190157	406.916	11.5051	0.518306	0.0674943	417.59	45.513	0.019912	0.0017389	398.23	34.4461	0.0552807	0.00641544	359.672	290.085	15.389	0.434516	2.21414	97.5236	45.6178	8.4313		0.335162	-0.0927154
NTEM - 19.d	28	0.0663485	0.00165042	414.077	9.97205	0.498847	0.0579097	407.438	39.0649	0.0208232	0.0018139	416.256	35.8917	0.0528481	0.00466881	277.242	227.205	15.1215	0.372855	2.26476	148.158	66.1849	12.9956		-0.105684	0.307234
NTEM - 20.d	28	0.0664545	0.00214213	414.65	12.9525	0.476862	0.0709464	398.772	47.7481	0.0190005	0.002064	379.991	40.89	0.0511121	0.00654465	212.483	307.846	15.118	0.47984	2.51153	101.667	40.6141	7.20719		0.12793	0.135203
NTEM - 21.d	28	0.0683666	0.00199982	426.223	12.0667	0.508515	0.0562499	425.843	39.7919	0.0222069	0.00187015	443.622	37.0003	0.0549233	0.00498551	359.846	213.425	14.4582	0.368849	2.97253	190.688	63.9267	13.5513		0.26368	0.0330079
NTEM - 22.d	18.544	0.0645589	0.00239893	403.188	14.5227	0.511152	0.0850645	409.78	57.4721	0.0199206	0.00240432	398.271	47.5379	0.0569566	0.00868735	373.899	317.986	15.6246	0.582246	2.23748	104.482	46.8951	8.9496		0.111727	0.083067
NTEM - 23.d	28	0.0673767	0.00169411	420.287	10.2239	0.530516	0.0580339	429.532	38.66	0.0228782	0.00147132	457.068	29.0512	0.0572473	0.00483228	467.525	191.852	14.8929	0.367421	2.83651	260.931	92.0877	20.2683		0.0294154	0.248975
NTEM - 24.d	28	0.0666023	0.00205893	415.556	12.4435	0.483647	0.0611718	406.478	41.7974	0.0225341	0.0022778	449.884	44.9686	0.053407	0.0058752	295.144	260.16	15.1315	0.470946	3.37317	141.998	42.4103	9.3063		0.268072	-0.0447715
NTEM - 26.d	28	0.0670743	0.0018116	418.445	10.9382	0.500053	0.057835	415.753	36.3854	0.0208889	0.00176944	417.576	34.999	0.0544837	0.00525775	388.532	201.565	14.9325	0.416275	3.0952	181.01	58.8484	11.3366		0.270029	0.00901265
NTEM - 27.d	28	0.067049	0.00188417	418.282	11.3857	0.517641	0.0641963	422.979	40.8744	0.020468	0.00163444	409.295	32.3723	0.0556721	0.00572049	382.563	244.758	14.9501	0.4116	2.22232	142.254	63.8074	12.528		0.207016	0.061743
NTEM - 28.d	28	0.0656878	0.0018031	410.061	10.9022	0.500234	0.0600856	407.609	40.9528	0.0203289	0.0014184	406.621	28.0909	0.0539936	0.00522872	297.326	243.45	15.3005	0.418452	1.73686	165.308	94.8949	18.1023		0.224454	0.0504538
NTEM - 29.d	28	0.0663814	0.00251788	414.144	15.2194	0.428258	0.0827595	352.557	57.7057	0.0188309	0.00306348	375.98	60.6968	0.0490927	0.00896836	33.8507	479.417	15.2804	0.591707	2.69384	50.4114	17.5714	3.42994		0.168791	0.00731828
NTEM - 30.d	28	0.0661705	0.00215917	412.93	13.0589	0.520195	0.0724606	422.61	46.5082	0.0226016	0.0022469	451.236	44.3877	0.0564167	0.00615131	292.75	294.463	15.183	0.486032	3.07006	107.177	33.7112	7.56121		-0.0521638	0.376501
P1
P1 - 1.d	28	0.000173955	0.000476269	1.11179	3.06905	-0.0718759	0.0443678	-74.6066	53.2299	0.000502877	0.000846598	10.0679	17.0817	-0.00840349	0.669951	3484.37	557.823	328.254	551.893	1.25584	35.2226	28.419	0.19393		-0.35051	0.13196
P1 - 2.d	28	0.000723287	0.00049037	4.65088	3.15823	-0.0564975	0.0585278	-71.9454	64.2808	-0.00179885	0.000801324	-36.4751	16.216	-0.409176	0.622705	3792.12	456.542	266.919	274.115	1.27015	33.977	26.9404	-0.455019		0.0780208	-0.188594
P1 - 3.d	28	0.000959663	0.000596438	6.16857	3.84045	-0.0114821	0.0671983	-19.1759	74.1998	-0.000670286	0.000786061	-13.6334	15.8813	0.453471	0.491726	3469.26	636.158	303.517	214.404	1.29174	34.6338	27.0472	-0.116791		0.565889	-0.197393
P1 - 4.d	28	0.000819393	0.00048294	5.27025	3.10988	0.0457973	0.0546544	36.1123	56.4708	0.000286699	0.000835938	5.70246	16.8773	0.203424	0.627414	3743.69	521.163	-195.389	520.656	1.30615	32.4844	25.2778	0.0423976		0.197924	-0.0588496
P1 - 5.d	24.558	0.000108755	0.000422892	1.14197	2.60681	0.0597325	0.0783145	27.5407	74.6605	-0.000346834	0.000837132	-7.09288	16.9184	0.575991	0.690832	4019.19	311.508	147.453	528.277	1.24512	33.668	26.6233	-0.0692736		0.443726	-0.0436383
P1n
P1n - 1.d	28	0.000185757	0.000639038	1.18027	4.11708	-0.0412754	0.0768636	-72.8773	86.5256	0.00102708	0.00121221	20.557	24.4531	0.265746	0.884559	2526.09	967.252	134.464	417.765	1.27498	26.68	20.4444	0.229237		0.0924214	0.130241
P1n - 2.d	28	-8.94152e-05	0.000650666	-0.594146	4.19302	-0.133703	0.080805	-185.653	97.2976	-0.000789751	0.00125142	-16.174	25.2597	-0.14684	0.796883	3292.58	756.16	-54.4548	263.344	1.2467	25.4779	20.5997	-0.174082		0.000160963	0.193815
P1n - 3.d	28	0.000905897	0.00069538	5.81696	4.47654	0.000447704	0.0828089	-16.8301	86.2685	-0.000520399	0.00131453	-10.7479	26.5543	0.354569	0.414398	3826.66	445.67	-48.0148	232.71	1.20478	26.6182	21.8999	-0.111809		0.230452	-0.0823665
P1n - 4.d	28	6.88388e-05	0.000694765	0.423558	4.47554	-0.0960162	0.080476	-114.823	99.1505	-0.000502944	0.00132827	-10.3998	26.842	0.0597149	0.446121	3176.59	1031.12	-231.831	251.627	1.29949	24.8179	19.3718	-0.106222		-0.325031	0.173105
P1n - 5.d	28	0.000233166	0.000675146	1.48385	4.34969	-0.00600928	0.0810711	-0.794354	84.7788	-0.00223476	0.00133486	-45.4536	27.0137	0.0775469	0.362689	3987.57	472.195	-48.4087	247.883	1.25454	25.6903	20.9406	-0.378132		-0.127676	0.260237
P1n - 6.d	28	-8.80709e-05	0.000681322	-0.587197	4.3909	-0.108991	0.0665046	-153.104	76.2191	0.000785809	0.00140394	15.6185	28.354	-0.0231966	0.606003	4095.08	522.885	121.66	298.753	1.27383	24.2831	18.9751	0.154374		-0.0846189	0.12542
P1n - 7.d	28	0.000817173	0.000681025	5.24632	4.38515	-0.0804965	0.0843349	-127.708	94.3365	-0.000836394	0.00126818	-17.1234	25.6185	0.244498	0.469627	3766.9	715.427	-109.254	329.811	1.2323	24.3619	20.3296	-0.0878878		-0.281588	0.00572616
P1n - 8.d	28	0.000724598	0.000662538	4.65102	4.26777	0.0311683	0.0784275	3.7974	82.2059	-0.000461305	0.00162136	-9.67159	32.7729	-0.383191	0.576426	3865.57	403.185	6.21596	261.451	1.29669	23.229	17.8821	-0.0958441		0.290307	-0.0270311
P1n - 9.d	28	0.000905204	0.000848094	5.80265	5.45885	0.102599	0.0973633	98.2012	97.0298	0.000825937	0.00106586	16.5385	21.5183	0.16116	0.843411	3411.64	761.669	61.5815	240.174	1.10585	28.1401	26.0668	0.236537		0.282639	0.0542751
P1n - 10.d	28	0.000603108	0.000717711	3.86518	4.62354	-0.00648927	0.0908844	-59.8131	90.5769	-0.000658697	0.00106225	-13.4662	21.4734	-0.401241	0.937911	2669.17	1668.21	359.741	381.841	1.24212	24.2373	19.5235	-0.0710511		0.0122807	0.0129586
Z_91500_Schoene
91500 - 1.d	28	0.179231	0.00499807	1062.37	27.311	1.84381	0.195287	1054.03	70.9108	0.0530171	0.00429353	1042.63	82.3625	0.0746953	0.0058448	1047.35	163.677	5.57283	0.155651	2.66538	79.7977	29.9525	14.9982		0.217097	0.205088
91500 - 2.d	28	0.180883	0.00521428	1071.34	28.4332	1.8751	0.195225	1071.26	66.7501	0.0528411	0.00395167	1039.58	75.8411	0.0756409	0.00576568	1094.6	146.818	5.54136	0.15193	2.67101	80.97	30.1984	15.0054		0.237937	0.274998
91500 - 3.d	28	0.17753	0.00441083	1053.22	24.1375	1.8244	0.199507	1057.5	72.2423	0.0554173	0.00457466	1088.42	87.5775	0.0735345	0.00603463	1070	178.213	5.59123	0.138418	2.65757	79.0754	29.761	14.9886		0.20704	0.112456
91500 - 4.d	28	0.180729	0.0055389	1070.39	30.1615	1.84098	0.196538	1057.68	68.5488	0.0556761	0.00425029	1093.73	81.2723	0.0750614	0.00596419	1090.14	158.052	5.57378	0.167259	2.67498	80.7896	30.1965	15.0111		0.415125	0.0900399
91500 - 5.d	28	0.181111	0.00570183	1072.42	31.0929	1.9077	0.200096	1084.14	65.6521	0.0526698	0.00391967	1036.32	75.0735	0.0776806	0.00647613	1143.75	152.45	5.5456	0.168286	2.67271	79.4989	29.7687	14.9879		0.151467	0.260867
91500 - 6.d	28	0.180823	0.00526877	1070.99	28.7	1.80766	0.19041	1041.97	66.2319	0.0541045	0.00446064	1063.35	85.4345	0.0729174	0.00576947	1049.1	165.065	5.56468	0.159677	2.65276	80.5234	30.3041	15.0186		0.182875	0.290965
91500 - 7.d	28	0.178622	0.00477411	1059.11	26.1239	1.88	0.20904	1069.7	77.0882	0.053239	0.00417938	1047.01	80.2511	0.0755767	0.00618081	1062.95	182.827	5.606	0.145095	2.65981	79.4988	29.9134	14.9854		-0.0692207	0.366697
91500 - 8.d	28	0.178779	0.00472285	1059.98	25.818	1.85534	0.206594	1054.94	73.6901	0.0565815	0.0042191	1111.11	80.7576	0.0757435	0.00655569	1060.56	178.277	5.57753	0.166088	2.7015	80.757	30.1208	15.0119		0.23148	0.260633
91500 - 9.d	28	0.180283	0.00506982	1068.1	27.7007	1.83831	0.194009	1063.3	68.9673	0.0520916	0.00406544	1025.05	78.3079	0.0739575	0.00569089	1065.78	156.997	5.55834	0.151076	2.65937	79.543	29.7532	14.9874		0.122993	0.263422
91500 - 10.d	28	0.178763	0.00553193	1063.22	29.1775	1.88276	0.205014	1072.95	68.5599	0.0522075	0.00361706	1027.7	69.4249	0.0764762	0.00621227	1075.5	171.971	5.5766	0.175519	2.64985	80.347	30.564	15.0041		0.188284	0.220285
91500 - 11.d	28	0.177328	0.00495249	1051.96	27.1286	1.83479	0.206327	1071.06	70.7887	0.0542266	0.00413898	1066.02	79.4497	0.0744618	0.00653214	1113.83	183.749	5.67027	0.160407	2.68675	80.0288	29.8469	15.0049		0.020929	0.271441
91500 - 12.d	28	0.18046	0.00485699	1069.13	26.5464	1.84736	0.191445	1062.7	69.869	0.0526643	0.00390827	1036.22	74.9487	0.0742446	0.00559735	1031.25	150.854	5.54812	0.14434	2.66312	79.8664	29.9678	14.9914		0.185867	0.206857
91500 - 13.d	28	0.180792	0.00474194	1070.98	25.8691	1.85941	0.198878	1074.89	73.2686	0.0555407	0.00396496	1101.4	79.1129	0.0757544	0.0060924	1102.01	161.594	5.55449	0.144954	2.6693	79.5433	29.8764	15.0031		0.133661	0.180894
91500 - 14.d	28	0.17923	0.00510704	1062.33	27.8688	1.86167	0.197884	1065.84	73.1609	0.0552799	0.00454248	1085.82	86.8835	0.0748314	0.00579036	1056.91	172.308	5.57481	0.157507	2.6511	81.1904	30.5856	15.0125		0.241867	0.19546
91500 - 15.d	28	0.177464	0.00548399	1052.54	29.9737	1.85295	0.200701	1062.45	68.7743	0.0525308	0.00380647	1033.75	73.2256	0.0754649	0.00633019	1060.83	176.673	5.63869	0.183953	2.65416	79.7579	29.9849	14.9907		0.183252	0.185161
91500 - 16.d	28	0.179927	0.00506811	1066.16	27.6876	1.82857	0.204184	1073.36	72.0483	0.052022	0.00464471	1023.12	89.1427	0.073323	0.00666526	1054.55	172.071	5.58916	0.158469	2.72935	79.6909	29.7271	15.0455		0.143668	0.188776
91500 - 17.d	28	0.177818	0.00523594	1054.56	28.6614	1.89464	0.205765	1076.31	70.1673	0.0523738	0.00364675	1030.87	70.0774	0.0770719	0.00605705	1095.4	155.404	5.5975	0.173283	2.64069	78.711	29.9364	14.8353		0.124666	0.39795
91500 - 18.d	28	0.18137	0.00589154	1073.77	32.111	1.82009	0.205277	1054.57	77.9289	0.0561399	0.00380301	1103.04	72.7617	0.0729977	0.0061617	985.982	187.317	5.54092	0.173232	2.66292	81.5175	30.7092	15.2016		0.126491	0.289969
Z_FC1
FC1 - 1.d	28	0.187982	0.00448255	1110.22	24.3372	1.92146	0.18445	1087.03	64.4663	0.0544463	0.00275778	1071.36	52.8645	0.0740816	0.0047769	1049.44	130.298	5.32305	0.124342	1.65922	354.943	213.404	113.556		0.325211	0.207825
FC1 - 2.d	28	0.183082	0.00415043	1083.64	22.62	1.95033	0.188745	1096.57	65.2526	0.0545456	0.00299881	1073.1	57.4465	0.0771622	0.00512585	1121.26	128.425	5.45264	0.133016	1.63101	315.226	191.25	97.0909		0.361361	0.0990868
FC1 - 3.d	28	0.185769	0.00413357	1098.28	22.4581	1.81385	0.175442	1051.29	61.2475	0.0560405	0.00291551	1101.83	55.8337	0.0724627	0.00482609	1012.02	117.488	5.3922	0.11936	1.59669	300.684	187.758	98.4657		0.333769	0.159097
FC1 - 4.d	28	0.183127	0.00453769	1083.78	24.7086	2.00239	0.205756	1114.84	71.0842	0.0568448	0.00289847	1117.26	55.4284	0.0787509	0.00556136	1175.04	143.119	5.46431	0.129277	1.91221	217.64	113.39	59.4079		-0.113895	0.492512
FC1 - 5.d	28	0.186744	0.00417001	1103.57	22.6672	2.02244	0.196968	1120.66	66.8351	0.0569396	0.00284991	1119.1	54.4974	0.077596	0.00505386	1134.81	139.2	5.34398	0.110832	1.60461	287.256	183.596	91.2186		0.0163578	0.35191
FC1 - 6.d	28	0.183672	0.00399784	1086.89	21.7728	1.98999	0.192774	1110.09	65.1435	0.0585828	0.00308483	1150.38	58.9262	0.0773092	0.00518203	1124.17	126.183	5.44208	0.112809	1.65577	265.122	159.596	86.8276		0.194884	0.207587
FC1 - 7.d	28	0.186147	0.00410245	1100.34	22.3037	2.06753	0.19971	1139.39	69.4845	0.0569967	0.00291538	1129.76	60.8117	0.0812026	0.00529244	1234.34	143.359	5.37117	0.123934	1.66636	250.579	152.258	81.4129		0.324817	0.0773567
FC1 - 8.d	28	0.1828	0.00420282	1082.09	22.9196	1.91248	0.193998	1080.86	67.7327	0.0566162	0.00305491	1112.77	58.4267	0.0759009	0.00539741	1105.74	139.277	5.4715	0.122861	1.74092	230.446	133.682	68.0908		0.0985988	0.249141
FC1 - 9.d	28	0.184623	0.00412683	1092.04	22.4413	1.93343	0.190462	1089.81	65.5475	0.0549908	0.00262872	1081.89	50.3433	0.0743493	0.00492912	1056.51	145.04	5.41559	0.115263	1.51282	343.629	232.997	117.034		-0.0343154	0.385677
FC1 - 10.d	28	0.185605	0.00400422	1097.42	21.7686	1.90094	0.189286	1085.66	65.9274	0.0532527	0.00260689	1048.53	50.0469	0.0751299	0.00525526	1073.46	138.07	5.37441	0.115627	1.58721	274.408	171.786	68.4851		0.191192	0.0868941
Z_GJ1
gj1 - 1.d	28	0.0995604	0.00216242	611.795	12.6796	0.801302	0.0814559	595.394	46.0083	0.0269921	0.00552556	534.725	108.559	0.0582371	0.00409783	535.882	155.892	10.0395	0.207888	41.8045	377	9.09809	2.19792		-0.190416	0.466616
gj1 - 2.d	28	0.0993477	0.00211493	610.554	12.398	0.804342	0.0802126	597.626	44.9041	0.0301696	0.00463666	598.342	90.9075	0.0598345	0.00408271	602.635	143.618	10.059	0.226095	44.5459	369.396	8.39049	2.2729		0.194529	0.147989
gj1 - 3.d	28	0.0977607	0.0021661	601.23	12.7171	0.807255	0.0819014	601.696	43.9659	0.0295598	0.00539036	585.443	105.363	0.0594586	0.00423183	566.853	158.577	10.211	0.22599	43.8411	385.907	8.704	2.36673		-0.0359289	0.323875
gj1 - 4.d	28	0.09884	0.00214585	607.571	12.5851	0.787556	0.0781889	590.984	42.2821	0.0297662	0.00598627	588.658	117.117	0.0571089	0.0040905	508.677	141.293	10.1315	0.218896	42.1004	381.359	9.0526	2.28516		0.280201	0.0207144
gj1 - 5.d	28	0.0967868	0.00210873	595.514	12.4038	0.753839	0.0769247	571.287	46.2843	0.0300891	0.00501503	596.316	98.1731	0.058268	0.00427973	518.463	170.445	10.3472	0.23009	42.8915	386.849	8.93724	2.37626		0.108252	0.180303
gj1 - 6.d	28	0.0971267	0.00222812	597.494	13.1039	0.833054	0.0833425	618.998	49.3398	0.0332358	0.0053691	657.586	104.663	0.0628017	0.00433537	691.271	153.315	10.2704	0.238925	44.3895	368.327	8.30775	2.56302		0.120928	0.242399
gj1 - 7.d	28	0.0976796	0.00213965	600.757	12.5679	0.802047	0.081401	598.889	44.0751	0.0337664	0.00506612	668.366	98.6268	0.0589814	0.00421482	591.357	156.289	10.2532	0.226088	43.709	368.577	8.36701	2.58126		-0.0936099	0.350689
gj1 - 8.d	28	0.0975657	0.00220383	600.079	12.9422	0.801313	0.081725	595.318	46.0873	0.0329694	0.00557119	652.088	108.887	0.0587814	0.0042496	539.18	167.271	10.2691	0.232136	42.8392	369.085	8.80454	2.50349		0.0672576	0.206535
gj1 - 9.d	28	0.098154	0.00223327	603.53	13.1109	0.791886	0.0791247	590.574	44.5504	0.0307245	0.00576713	607.801	112.717	0.0583259	0.00411764	528.485	159.421	10.2086	0.233362	43.8557	382.817	8.87261	2.59305		0.117413	0.193218
gj1 - 10.d	28	0.0993263	0.00206992	610.435	12.1355	0.802356	0.082418	599.1	43.8073	0.033529	0.00500059	663.782	97.7837	0.0580195	0.00430908	511.578	153.322	10.0771	0.209443	45.8952	362.635	8.06569	2.46311		0.0463806	0.132248
gj1 - 11.d	28	0.0981116	0.00210699	603.3	12.3703	0.824825	0.0837717	608.557	46.1985	0.0296436	0.00573301	586.599	112.516	0.0609137	0.00444478	617.021	153.31	10.1885	0.229495	43.2273	355.887	8.40774	2.07337		0.0639646	0.222444
gj1 - 12.d	28	0.0961212	0.00214984	591.594	12.6455	0.846037	0.0862286	623.089	45.3959	0.0280223	0.00521239	555.431	102.272	0.0639063	0.00468706	730.545	156.933	10.4222	0.234914	42.4754	383.694	9.24437	2.47667		0.159471	0.2033
gj1 - 13.d	28	0.097028	0.0022362	596.913	13.1354	0.816897	0.0811892	607.433	47.5747	0.0277041	0.00526001	549.122	102.837	0.0616455	0.00429156	661.686	161.725	10.3081	0.245288	45.3113	344.836	7.5424	1.922		0.0539655	0.274741
gj1 - 14.d	28	0.0976273	0.00219249	600.442	12.8872	0.784589	0.0772756	586.778	44.3793	0.0331777	0.00554133	656.225	107.908	0.0590882	0.00408155	583.051	159.58	10.2435	0.243333	44.0471	354.319	8.02603	2.4185		0.192663	0.176284
gj1 - 15.d	28	0.0971381	0.00229677	597.551	13.4794	0.834302	0.0825771	614.463	45.8691	0.0286935	0.0046266	569.347	90.7189	0.0611751	0.00426239	620.573	156.213	10.2754	0.256599	43.3536	401.346	9.00679	2.45049		0.313554	0.1076
gj1 - 16.d	28	0.0983953	0.00222348	604.948	13.0488	0.814726	0.084026	602.487	47.2022	0.0247403	0.00504271	490.958	99.1317	0.0593233	0.00457955	549.24	166.307	10.1617	0.220447	38.6662	448.904	11.7471	3.00319		0.199521	0.104001
gj1 - 17.d	28	0.0986386	0.00249742	606.332	14.6584	0.820032	0.0808573	609.119	43.2376	0.0259734	0.00546866	514.729	107.381	0.0604059	0.00422457	628.885	159.143	10.1204	0.256613	41.3102	395.538	9.60605	2.30876		0.308348	0.164279
gj1 - 18.d	28	0.0980046	0.00227371	602.646	13.3542	0.828348	0.0836535	610.636	46.5211	0.0280704	0.00494805	556.712	97.0078	0.0611782	0.0042797	666.41	141.899	10.188	0.239321	44.0365	378.362	8.91011	2.26112		-0.0888942	0.366942
Z_OG1
ogc - 1.d	28	0.60359	0.0192685	3040.41	77.2352	24.5887	2.39412	3291.32	97.937	0.188944	0.00880307	3497.41	149.389	0.295822	0.0180544	3449.17	98.7677	1.66518	0.0542556	1.02772	235.174	237.275	431.853		-0.151803	0.950121
ogc - 2.d	28	0.510655	0.0170982	2655.8	72.9509	21.2266	2.10237	3147.46	92.4231	0.172354	0.00829636	3213.06	143.114	0.305723	0.0189492	3496.71	96.1514	1.96991	0.0692455	2.08249	207.56	98.2018	159.66		0.159366	0.912819
ogc - 3.d	28	0.611512	0.0129878	3075.53	51.9224	24.0519	2.26501	3269.36	92.1472	0.188903	0.0091438	3496.13	155.521	0.290653	0.0179253	3418.78	95.6131	1.63715	0.034709	1.3439	168.552	123.373	217.403		0.288388	0.564235
ogc - 4.d	28	0.695574	0.0157909	3408.08	62.362	30.1515	2.8398	3490.57	92.8074	0.185324	0.00902461	3435.15	153.852	0.316357	0.0194328	3550.25	95.0298	1.43446	0.0318258	1.31211	141.325	107.379	191.329		0.350132	0.682566
ogc - 5.d	28	0.730035	0.0174712	3531.99	65.0816	30.2447	2.87017	3492.79	92.6028	0.199824	0.0106388	3679.05	178.959	0.296783	0.0182836	3451.29	95.3686	1.37018	0.0313689	1.75559	106.017	61.7726	109.912		0.0491888	0.741864
ogc - 6.d	28	0.696865	0.0166972	3413.17	65.6376	29.2291	2.76437	3462.27	97.1602	0.20034	0.00992392	3689.12	166.935	0.302799	0.0185596	3482.8	94.627	1.42973	0.0350652	1.06644	140.904	131.688	245.515		-0.0132569	0.818303
ogc - 7.d	28	0.705767	0.0174906	3440.68	66.211	30.5026	2.89164	3503.9	96.0416	0.198086	0.00947901	3651.76	159.997	0.317182	0.0197422	3553.13	96.1171	1.42158	0.0356817	1.12297	109.571	98.118	184.136		0.330048	0.67323
ogc - 9.d	28	0.696607	0.0171138	3406.07	65.1635	29.7042	2.8442	3477.66	90.0496	0.188423	0.00989038	3486.61	168.284	0.30281	0.0188881	3481.36	96.5558	1.43612	0.0340629	1.35034	107.12	82.5782	144.175		0.116963	0.642193
Z_Plesovice
ples - 1.d	28	0.0540413	0.00126623	339.265	7.74628	0.382494	0.0395756	327.853	28.9565	0.0153903	0.00154147	308.461	30.6259	0.0514118	0.00387011	265.474	176.232	18.4664	0.402193	10.9694	515.382	46.5975	6.75823		0.319465	-0.0569514
ples - 2.d	28	0.0539498	0.00117163	338.714	7.16685	0.398606	0.0400381	339.874	29.2608	0.0157329	0.0016692	315.23	33.1889	0.0540961	0.0038544	342.97	170.211	18.5279	0.424993	11.1865	487.684	43.3086	6.31278		0.409782	-0.137132
ples - 3.d	28	0.0536768	0.00126551	337.035	7.74234	0.355404	0.0370863	309.737	26.7995	0.0159239	0.00188413	318.934	37.5073	0.0501075	0.00390397	210.997	156.684	18.5866	0.435608	11.6057	431.133	37.4014	5.64979		0.190473	0.153888
ples - 4.d	28	0.0526898	0.00120781	330.998	7.39675	0.430853	0.0448697	364.829	30.7429	0.017541	0.0021484	350.961	42.6389	0.0604641	0.00460159	589.662	179.568	19.0193	0.438652	11.9384	403.971	33.6501	5.63506		0.246593	0.0171796
ples - 5.d	28	0.0533369	0.00132125	334.949	8.08264	0.381813	0.0404645	329.527	31.0057	0.0183595	0.00184116	367.376	36.5558	0.0508794	0.00387626	278.203	205.219	18.7259	0.458954	11.3117	471.219	42.8858	7.16984		0.106254	0.150452
ples - 7.d	28	0.0535896	0.00113758	336.513	6.95945	0.416192	0.0421048	352.443	30.0808	0.0174827	0.00151874	350.094	30.1661	0.0562964	0.00406964	445.085	165.397	18.6815	0.395301	10.9126	624.517	56.9632	9.42838		0.213736	-0.0166909
ples - 8.d	28	0.0527494	0.00115622	331.367	7.08026	0.380218	0.0401514	325.966	29.4516	0.0152197	0.0015019	305.078	29.8981	0.0523504	0.00406626	300.522	192.073	18.9481	0.440375	10.9159	556.129	51.4761	6.98876		0.124109	0.121832
ples - 9.d	28	0.0536673	0.00125373	336.978	7.66957	0.404158	0.0439447	345.603	30.6759	0.0159562	0.00153359	319.73	30.5021	0.0538577	0.00436473	325.687	186.545	18.6364	0.417045	9.95271	621.419	64.1604	9.29739		0.242302	0.0156263
ples - 10.d	28	0.0539145	0.00123119	338.492	7.53189	0.406054	0.042589	344.762	30.5697	0.0179816	0.00164475	359.957	32.6614	0.0547356	0.00422891	369.621	169.023	18.5485	0.444744	10.763	582.664	53.5471	6.83087		0.122159	0.123819
Z_R33
R33 - 1.d	28	0.0680368	0.00175949	424.265	10.6181	0.481878	0.0548377	400.185	35.7803	0.0192321	0.00136075	384.892	26.9776	0.051179	0.00461237	249.565	226.483	14.7112	0.400756	1.2831	161.4	125.336	22.7321		0.319696	-0.0334608
R33 - 2.d	28	0.0684052	0.00181654	426.481	10.9571	0.509022	0.0614574	417.714	40.0135	0.0201249	0.00150619	402.545	29.8275	0.0532379	0.00548832	310.988	239.505	14.6837	0.389289	1.98928	177.46	88.4407	16.5826		0.103294	0.133511
R33 - 3.d	28	0.0680569	0.0015848	424.408	9.5617	0.53862	0.0593636	434.726	39.0407	0.0224813	0.0013092	449.276	25.8783	0.0578585	0.00485878	473.104	200.913	14.6982	0.351218	1.43898	343.521	238.067	48.8777		0.182294	0.00159979
R33 - 4.d	28	0.066412	0.00195264	414.422	11.8022	0.506558	0.0616966	411.539	41.631	0.0214021	0.00171762	427.763	33.9898	0.0536902	0.00548	374.588	229.279	15.0573	0.474656	2.1505	165.682	76.4833	14.9357		0.288852	-0.0562996
R33 - 5.d	28	0.0668949	0.00240421	417.269	14.5246	0.486146	0.063689	396.409	42.9136	0.0201242	0.00185686	402.383	36.7558	0.0547578	0.00623962	267.514	275.091	14.9725	0.538612	1.84992	89.8855	48.493	9.24327		0.372869	-0.0156004
R33 - 6.d	28	0.0658207	0.00167313	410.882	10.1217	0.534357	0.067794	433.355	45.6993	0.020594	0.00150902	411.841	29.8662	0.058154	0.00640674	457.126	259.223	15.2495	0.393327	1.50959	131.492	87.2282	15.8998		0.251523	-0.0570618
R33 - 7.d	28	0.0652774	0.00241466	407.482	14.6268	0.525084	0.0683161	427.126	47.6115	0.0215217	0.00158637	430.185	31.3927	0.059684	0.00694336	497.632	272.916	15.4616	0.618897	1.45361	79.1075	55.0918	11.1843		0.360581	0.00344057
R33 - 8.d	28	0.0644103	0.00213826	402.278	12.9543	0.488668	0.0654282	408.556	40.2587	0.020755	0.00189301	414.866	37.4817	0.0536636	0.0054572	308.941	261.157	15.3973	0.486023	2.00907	106.787	53.3742	9.74382		-0.0263664	0.320875
R33 - 9.d	28	0.0681379	0.00182731	424.867	11.0198	0.472758	0.063919	391.697	43.133	0.0208499	0.00147333	416.925	29.1634	0.0501734	0.00580487	162.528	297.513	14.7025	0.401429	2.03231	142.684	71.5731	14.0988		0.0777451	0.112655
R33 - 10.d	28	0.0701166	0.00212693	436.758	12.7991	0.563011	0.0670699	458.481	47.4202	0.0220944	0.0018446	441.409	36.4813	0.0590651	0.00610184	488.883	230.908	14.3132	0.443157	1.43493	94.4789	65.1075	14.0201		0.186826	0.0429243
R33 - 11.d	28	0.0664782	0.00170815	414.854	10.3306	0.53728	0.0595247	440.864	39.4669	0.0216937	0.00120172	433.725	23.7701	0.0580273	0.0050423	545.123	177.287	15.0123	0.390408	1.02805	255.456	258.842	48.7369		0.198886	0.0409191
R33 - 12.d	28	0.0656152	0.00181095	409.621	10.9589	0.56137	0.0748643	450.193	46.1748	0.0229477	0.0015172	458.424	29.96	0.0628713	0.00715063	669.764	222.628	15.2692	0.449337	1.6437	116.333	73.1093	15.5751		0.198235	0.00275571
R33 - 13.d	28	0.0659345	0.00208344	411.514	12.5986	0.484076	0.0550853	401.069	38.9123	0.020303	0.00152489	406.069	30.2056	0.0540054	0.00494856	349.294	197.268	15.2338	0.468745	1.99063	150.649	76.7036	14.2449		0.167933	0.13649
R33 - 14.d	28	0.066024	0.00172975	412.105	10.4594	0.481534	0.0551856	395.961	38.3975	0.0209956	0.00129563	419.873	25.6362	0.0539554	0.00500897	253.427	233.594	15.1192	0.363751	1.42188	196.321	140.178	26.9474		0.018932	0.266663
R33 - 15.d	28	0.0667161	0.00217204	416.227	13.1238	0.471129	0.0705758	389.015	50.051	0.0193683	0.00173877	392.335	32.9874	0.050693	0.00652807	160.12	302.363	15.1264	0.497341	1.47952	114.961	77.2826	14.5008		-0.0141537	0.276073
R33 - 16.d	28	0.0651268	0.0017731	406.67	10.7282	0.507515	0.056859	417.799	39.5012	0.0197293	0.0011542	394.819	22.8741	0.0564257	0.00482687	451.42	169.258	15.3854	0.404512	1.22533	236.724	194.152	37.9186		0.0944954	0.184143
R33 - 17.d	28	0.0662507	0.00180005	413.467	10.8802	0.500395	0.0578621	408.513	39.3087	0.0198637	0.0011886	397.473	23.559	0.0551116	0.00510991	409.085	224.505	15.168	0.413344	1.31071	212.113	160.858	29.084		0.152753	0.128741
R33 - 18.d	28	0.0665111	0.00164065	415.062	9.91454	0.501872	0.0548165	413.571	38.2549	0.0200194	0.00107137	400.594	21.231	0.0548366	0.00449262	419.301	188.663	15.047	0.384418	0.979089	302.492	307.101	49.6353		0.119694	0.12824
G_NIST610
610 - 1.d	28	0.239707	0.00577198	1384.84	29.9818	29.5337	2.78086	3472.26	88.7718	0.497633	0.0233893	8160.13	314.783	0.894876	0.0549611	4987.15	58.154	4.18342	0.0999632	0.967326	366.463	379.827	1821.72		0.582736	0.733656
610 - 2.d	28	0.235224	0.00541993	1361.57	28.214	29.4732	2.77584	3470.43	88.975	0.493859	0.0230923	8109.47	311.952	0.922333	0.0566214			4.26031	0.0959946	0.968758	353.802	364.22	1651.81		0.280278	0.771477
610 - 3.d	28	0.233216	0.00561329	1351.01	29.3503	27.915	2.64074	3416.96	88.8188	0.492913	0.023162	8115.64	330.44	0.888497	0.0543986	4976.22	75.045	4.29021	0.100284	0.966336	371.646	379.415	1764.18		0.189885	0.820319
610 - 4.d	28	0.23309	0.00572458	1350.32	29.9328	30.5351	2.88568	3502.64	92.6559	0.514479	0.024059	8386.38	319.662	0.953903	0.0582408			4.28417	0.105914	1.00854	341.683	333.344	1604.37		0.24806	0.838267
610 - 5.d	28	0.236019	0.00537162	1365.73	28.0072	29.6019	2.78216	3472.72	91.8974	0.521848	0.024482	8484.19	324.646	0.906827	0.055399	4994.74	0	4.23677	0.100604	0.975131	353.459	372.876	1705.65		0.464427	0.818305
610 - 6.d	28	0.237171	0.00568072	1371.65	29.6118	29.9783	2.83366	3484.41	93.3065	0.536918	0.0254124	8682.65	332.462	0.904494	0.055148	4988.38	71.98	4.20645	0.101478	1.00415	345.307	344.129	1712.88		0.362081	0.862803
610 - 7.d	28	0.234395	0.00564303	1360.06	28.2535	31.324	2.96556	3529.98	89.9322	0.531124	0.0248741	8607.09	327.673	0.969441	0.0592969			4.26729	0.0985451	0.99506	342.863	348.753	1741.67		0.329694	0.752886
610 - 8.d	28	0.234367	0.0054093	1357.09	28.2566	28.8316	2.72985	3448.66	96.1732	0.52122	0.0244604	8475.88	324.23	0.90402	0.0552835	4958.74	0	4.26697	0.0948811	1.02345	329.734	327.983	1531.94		0.0892673	0.822458
610 - 9.d	28	0.236289	0.00532213	1367.15	27.7389	30.4878	2.87387	3501.33	91.9442	0.500911	0.0237185	8223.54	334.472	0.917323	0.0561889			4.23098	0.090358	0.913966	398.079	441.818	2053.32		0.0447576	0.801516
610 - 10.d	28	0.238678	0.00571423	1379.49	29.7217	29.5457	2.7842	3470.63	92.6692	0.487866	0.0229004	8028.05	311.446	0.906815	0.0553109	4996.39	0	4.20116	0.100285	0.955877	350.772	366.431	1388.91		0.407752	0.829649
G_NIST612
612 - 1.d	28	0.261795	0.0086317	1497.71	44.2154	31.5864	3.16368	3539.43	105.942	0.552644	0.0297828	8877.17	387.952	0.876656	0.0574223	4906.79	86.1258	3.82335	0.141803	0.96194	28.3193	28.4271	153.743		0.20214	0.710732
612 - 2.d	28	0.267219	0.0120114	1523.59	61.0766	32.717	3.36943	3569.47	98.408	0.54602	0.0307519	8786.68	401.092	0.911732	0.0598518	4886.59	97.8602	3.74648	0.160382	0.926153	26.2004	27.1571	136.46		0.575977	0.800259
612 - 3.d	28	0.258648	0.00909466	1481.37	46.8211	30.8918	3.02654	3520.86	87.438	0.546302	0.0306413	8830.29	386.531	0.870937	0.0582246	4917.05	76.8577	3.80967	0.145194	0.930029	28.7544	30.081	150.391		0.450088	0.668092
612 - 4.d	28	0.256056	0.00965707	1467.79	49.6505	33.9805	3.35957	3602.41	100.314	0.563049	0.0302266	9049.4	405.931	0.959722	0.0627226	4875.79	327.914	3.91824	0.167622	0.994437	26.0455	25.9711	138.025		0.431709	0.700839
612 - 5.d	28	0.26479	0.0115227	1511.5	58.605	33.3654	3.33944	3596.07	99.6594	0.579149	0.0332963	9211.47	423.286	0.907431	0.0600636	4915.77	95.326	3.75836	0.161157	0.985694	26.779	27.9332	140.577		0.329048	0.664362
612 - 6.d	28	0.274177	0.0108138	1559.65	54.8473	32.3789	3.296	3564.18	94.0815	0.581941	0.0327882	9249.24	418.074	0.865591	0.0605322	4881.94	83.5623	3.65606	0.134343	1.01158	25.971	25.7378	138.388		0.376908	0.588182
612 - 7.d	28	0.276346	0.0099175	1571.12	50.1361	36.3221	3.57712	3668.82	98.2085	0.581483	0.0331119	9284.12	439.291	0.963481	0.064843	4885.14	203.49	3.66351	0.134983	0.958723	25.1224	26.2591	148.418		0.509015	0.477907
612 - 8.d	28	0.2596	0.0112259	1485.11	57.4984	31.8976	3.1817	3550.51	98.6149	0.564411	0.0325505	9022.18	420.512	0.91674	0.0652574	4901.2	50.0772	3.88166	0.160733	0.983489	24.3825	24.8833	123.231		0.523138	0.517811
612 - 9.d	28	0.268708	0.0133092	1549.06	62.971	33.2512	3.35271	3585.18	94.7762	0.562834	0.0319862	9003.43	414.756	0.891356	0.0599315	4897.13	68.311	3.7401	0.182804	0.915201	30.1033	33.8291	175.208		0.533453	0.748038
612 - 10.d	28	0.268516	0.0106961	1530.99	53.9737	33.4318	3.3215	3597.89	97.7938	0.546767	0.0303917	8797.83	395.18	0.908188	0.0626945	4885.38	86.6309	3.74048	0.145473	0.938487	25.6271	26.9362	112.639		0.487198	0.658282
Z_MudTank
mud - 1.d	28	0.122182	0.00825848	747.925	49.0489	1.17246	0.290775	749.205	163.9	0.0341979	0.00746606	673.193	144.425	0.0739379	0.01667	1362.03	328.611	8.49972	0.598885	1.85133	10.0983	5.66608	1.73663		-0.0359733	0.196916
mud - 2.d	28	0.115258	0.00897892	700.673	51.7396	0.547567	0.199779	421.195	141.297	0.0345209	0.00654035	681.006	127.951	0.0341647	0.0127929	84.348	626.651	8.83448	0.743563	1.78569	9.51461	5.44908	1.82858		0.226147	0.0198955
mud - 3.d	28	0.115372	0.00718727	702.306	41.3635	0.674587	0.272508	482.541	201.603	0.0314188	0.00726136	619.041	141.72	0.0409223	0.0180616	1227.09	483.308	8.79878	0.551393	1.82074	10.6978	5.91265	1.57785		-0.19689	0.191454
mud - 4.d	28	0.119757	0.00848226	726.935	48.8439	1.18767	0.318945	754.576	166.926	0.0349185	0.00806603	686.09	157.112	0.0663861	0.0172841	1200.64	500.37	8.49165	0.660576	1.84942	9.02499	4.97917	1.56321		0.16662	0.256148
mud - 5.d	28	0.121465	0.00827083	736.885	47.6385	0.884862	0.272517	678.676	144.39	0.038075	0.00712888	749.471	138.447	0.0543641	0.0183324	602.652	579.106	8.09307	0.536688	1.84593	10.3842	5.50632	1.8526		0.297511	-0.0483103
mud - 6.d	28	0.120703	0.00706407	733.132	40.4632	0.971219	0.304631	587.038	166.288	0.0444326	0.0103153	866.438	198.66	0.0606634	0.0191796	632.021	666.866	8.55661	0.506636	1.7742	10.8391	6.09055	2.21092		0.409013	-0.207233
mud - 7.d	28	0.111605	0.00791226	680.096	45.8796	0.708381	0.331709	540.073	191.753	0.0423798	0.00977501	827.937	188.062	0.0406954	0.0197668	834.163	681.751	8.88895	0.635323	1.87802	8.8354	4.61405	1.96708		0.107678	0.299119
mud - 8.d	28	0.128648	0.00894935	777.713	51.1476	0.763589	0.239142	501.143	133.723	0.0436723	0.00871586	855.307	168.46	0.0375283	0.0116665	256.319	448.493	7.89558	0.566616	1.74229	8.62617	5.32877	2.07595		-0.00625061	0.146275
mud - 9.d	28	0.12414	0.00831279	752.252	47.5441	1.01393	0.318915	718.88	148.976	0.0346826	0.00860102	730.182	179.637	0.0610202	0.0195239	1253.45	380.869	8.38258	0.538374	1.90948	9.27468	5.04679	1.7041		0.249551	0.121982
mud - 10.d	28	0.116182	0.0106686	704.939	60.9829	1.03134	0.342644	722.63	165.337	0.0396222	0.0076811	778.622	149.176	0.0627726	0.0217524	1392.68	363.652	9.08133	0.768562	1.74693	8.77907	5.01992	2.04423		0.12101	0.0755582
mud - 11.d	28	0.109753	0.00621604	670.148	36.0899	0.936093	0.286537	706.948	132.666	0.0363212	0.00757225	714.406	147.995	0.0635365	0.0190395	1049.87	359.013	8.98865	0.495881	1.80909	9.84611	5.411	1.78645		0.169077	0.0311594
mud - 12.d	28	0.117374	0.0076409	713.641	44.0478	0.998244	0.287201	724.798	148.594	0.0278723	0.00910875	578.081	188.152	0.0632543	0.0165337	910	487.611	8.57252	0.56191	1.85887	10.5664	5.81628	1.69563		-0.136847	0.290681
mud - 13.d	28	0.11587	0.00612895	713.236	38.1349	0.853506	0.31775	537.286	214.476	0.0475575	0.00931349	954.912	173.794	0.05749	0.0195525	1372.38	348.238	8.61082	0.519264	1.88414	9.13099	4.91985	2.02351		0.0911741	0.232286
mud - 14.d	28	0.116304	0.00819581	707.173	47.1641	1.12632	0.266327	797.372	132.99	0.0361249	0.00906756	707.567	176.63	0.0771459	0.0183554	1367.54	372.619	8.69706	0.59754	1.70919	8.21488	4.97837	1.62656		0.337034	0.0108265
mud - 15.d	28	0.117446	0.00831923	713.705	47.7817	1.113	0.32515	705.742	169.2	0.0346365	0.00720727	708.866	148.723	0.0658549	0.0193942	1130.01	485.192	8.70156	0.577408	1.70268	10.4871	6.07073	2.27496		0.270755	0.108403
mud - 16.d	28	0.119805	0.00887206	727.004	50.8552	0.595791	0.311403	424.014	208.904	0.0373891	0.00723858	735.858	141.336	0.0295349	0.0180077	548.412	575.668	8.65603	0.692439	1.70118	10.7949	6.42973	2.19702		-0.0636331	0.00600357
mud - 17.d	28	0.115064	0.0085202	708.819	51.9353	0.727406	0.305144	616.259	164.223	0.0390624	0.00745248	768.142	144.649	0.0456018	0.0177258	1232.91	456.997	8.59592	0.654043	1.72831	9.44233	5.76151	1.91942		0.334988	0.063577
mud - 18.d	28	0.119249	0.00761024	724.479	43.7641	0.758434	0.258336	539.641	159.251	0.0259671	0.00610453	536.133	127.217	0.0452459	0.0170682	822.616	494.479	8.75581	0.600037	1.60216	10.1499	6.22401	1.35399		0.214854	0.0369374

## Sheet: Data-day2
	Duration (s)	Final Pb206/U238_mean	Final Pb206/U238_2SE(prop)	Final Pb206/U238 age_mean	Final Pb206/U238 age_2SE(prop)	Final Pb207/U235_mean	Final Pb207/U235_2SE(prop)	Final Pb207/U235 age_mean	Final Pb207/U235 age_2SE(prop)	Final Pb208/Th232_mean	Final Pb208/Th232_2SE(prop)	Final Pb208/Th232 age_mean	Final Pb208/Th232 age_2SE(prop)	Final Pb207/Pb206_mean	Final Pb207/Pb206_2SE(prop)	Final Pb207/Pb206 age_mean	Final Pb207/Pb206 age_2SE(prop)	Final U238/Pb206_mean	Final U238/Pb206_2SE(prop)	Final U/Th_mean	Approx_U_PPM_mean	Approx_Th_PPM_mean	Approx_Pb_PPM_mean		rho 206Pb/238U v 207Pb/235U	rho 207Pb/206Pb v 238U/206Pb
009
009 - 1.d	28	0.0744853	0.00237322	463.023	14.2295	0.592478	0.0883421	470.769	56.4985	0.0402399	0.00835605	792.545	160.844	0.0572712	0.00544796	510.339	198.882	13.4631	0.409897	20.4402	517.358	49.0287	12.1877		0.161165	0.321732
009 - 2.d	28	0.0717618	0.00180689	446.741	10.8654	0.52629	0.0775524	428.312	51.57	0.0259739	0.00399446	517.818	78.7566	0.0523124	0.0047147	288.502	202.455	13.9288	0.331411	14.2872	628.598	44.9658	10.5189		0.424738	-0.0603517
009 - 3.d	28	0.0692338	0.00184615	431.505	11.1294	0.515427	0.0773227	420.48	51.9522	0.0210827	0.00295166	421.613	58.3733	0.052719	0.0051177	333.021	223.375	14.4482	0.40052	2.31179	369.601	166.402	32.4899		0.0726486	0.210352
009 - 4.d	28	0.0963062	0.00886444	590.177	51.7954	1.08264	0.225476	704.622	108.442	0.0298709	0.00495244	593.877	97.1181	0.0754602	0.00846322	1031.89	220.205	11.4426	0.960385	7.49413	464.016	66.004	18.3262		0.979836	-0.900421
009 - 5.d	28	0.0673757	0.00191137	420.279	11.5385	0.50709	0.0747072	415.517	50.3315	0.0227389	0.00324447	454.309	64.1066	0.0540599	0.00487561	373.825	215.444	14.7773	0.435271	14.0802	1006.35	75.7842	16.3972		0.30977	0.194001
009 - 6.d	14.088	0.0588263	0.00227361	368.421	13.867	0.614938	0.0921872	485.674	58.1525	0.015969	0.0023428	320.163	46.6286	0.076693	0.00798925	1138.44	239.647	17.1157	0.720995	1.84702	537.585	300.191	44.5616		-0.0488332	0.700606
009 - 7.d	26.926	0.0754824	0.00201114	469.064	12.0528	0.555932	0.0804457	449.936	49.7797	0.0267193	0.00379975	532.785	74.8053	0.0546516	0.00477044	387.208	195.833	13.2255	0.328539	10.2918	1171.97	114.537	27.5939		0.386403	0.0723295
009 - 8.d	4.772	0.040101	0.0015529	253.45	9.62438	1.1401	0.192863	770.239	90.1173	0.0457173	0.00657042	903.449	127.013	0.204293	0.0189847	2857.24	153.531	24.9857	0.96788	2.69488	2265.72	859.968	337.211		0.836484	-0.615505
009 - 9.d	28	0.243433	0.00683044	1404.1	35.3305	3.73557	0.541167	1576.58	115.956	0.105067	0.0142935	2018.83	261.505	0.112013	0.00978888	1824.13	157.286	4.11068	0.108476	1.42877	260.286	187.167	178.941		0.494675	0.126408
009 - 10.d	28	0.0668411	0.00177801	417.066	10.7366	0.507922	0.0748749	418.149	48.5708	0.0264543	0.00401376	527.318	79.0654	0.055693	0.00509098	412.474	216.144	14.996	0.392031	17.5622	654.221	38.1443	9.12561		0.178148	0.188426
009 - 11.d	28	0.541095	0.0162095	2786.1	67.879	14.2762	2.07431	2768.55	144.025	0.15535	0.0218827	2933.09	367.307	0.193391	0.0168357	2764.82	142.643	1.85722	0.0564999	1.98297	63.0306	32.5787	46.422		0.726508	0.204789
009 - 12.d	28	0.0671086	0.00172434	418.69	10.4135	0.511445	0.0761995	418.084	50.6035	0.0238729	0.00394328	476.199	77.717	0.055031	0.00515114	408.715	202.604	14.9274	0.381351	17.8845	472.807	27.4168	5.7417		0.294792	-0.0395128
009 - 13.d	28	0.0904398	0.00252921	558.063	14.9514	0.719581	0.105724	549.068	61.8336	0.0496878	0.00689835	979.791	132.851	0.0594485	0.00547029	571.053	187.425	11.0675	0.300038	6.51812	426.413	68.7403	31.4911		0.114166	0.245134
[truncated: 428 more rows]

## Sheet: Summary
Sample	206Pb/ 238U ratio	95% uncer-tainty (in percent)	MSWD	Prob-ability of fit	age (Ma)	95% conf (Ma)
[truncated: 8 more rows]

[truncated: 1 more sheets: Things to cite]
