# Supplementary material for: Effect of chemical abrasion of zircon on SIMS U–Pb, δ 18 O, trace element, and LA-ICPMS trace element and Lu–Hf isotopic analyses
Source: Copernicus journal article supplement (doi:10.5194/gchron-6-337-2024), 2024-07-10
Supplement: Supplementary file 3 [file Table S11-LASS trace elements.xls]

## Sheet: Data
Trace elements measured on Agilent 7700 QMS. 50 micron beam, 30s ablation, 45s total baseline, 10 Hz, 3J/cm2, 2 cleaning pulses
Primary reference material GJ-1 with 91Zr as internal reference isotope and assuming 43.14% Zr in unknowns. Columns in red were obtained using NIST 610 as the primary reference material and 29Si as the internal reference isotope assuming 14.76% Si in unknowns.
Internal 2SE uncertainty given
Howell limit of detection (LOD) utilised (https://doi.org/10.1016/j.chemgeo.2013.07.013; Howell et al. (2013)
Duration (column B) denotes the number of seconds taken for the integration. Shorter duration = shorter time resolved signal detected, possibly due to drill through
204Pb not measured accurately on QMS
RUN 1
SAMPLE ID	Duration (s)	Ca43_ppm_mean	Ca43_ppm_2SE(int)	Ca43_ppm_LOD_Howell	Ti49_ppm_mean	Ti49_ppm_2SE(int)	Ti49_ppm_LOD_Howell	Zr91_ppm_mean	Zr91_ppm_2SE(int)	Zr91_ppm_LOD_Howell	La139_ppm_mean	La139_ppm_2SE(int)	La139_ppm_LOD_Howell	Ce140_ppm_mean	Ce140_ppm_2SE(int)	Ce140_ppm_LOD_Howell	Pr141_ppm_mean	Pr141_ppm_2SE(int)	Pr141_ppm_LOD_Howell	Nd146_ppm_mean	Nd146_ppm_2SE(int)	Nd146_ppm_LOD_Howell	Sm147_ppm_mean	Sm147_ppm_2SE(int)	Sm147_ppm_LOD_Howell	Eu153_ppm_mean	Eu153_ppm_2SE(int)	Eu153_ppm_LOD_Howell	Gd157_ppm_mean	Gd157_ppm_2SE(int)	Gd157_ppm_LOD_Howell	Dy163_ppm_mean	Dy163_ppm_2SE(int)	Dy163_ppm_LOD_Howell	Er166_ppm_mean	Er166_ppm_2SE(int)	Er166_ppm_LOD_Howell	Yb172_ppm_mean	Yb172_ppm_2SE(int)	Yb172_ppm_LOD_Howell	Lu175_ppm_mean	Lu175_ppm_2SE(int)	Lu175_ppm_LOD_Howell	Hf178_ppm_mean	Hf178_ppm_2SE(int)	Hf178_ppm_LOD_Howell	Pb204_ppm_mean	Pb204_ppm_2SE(int)	Pb204_ppm_LOD_Howell
240
240 - 1.d	30	BelowLOD	354.253	994.889	13.3803	4.1077	6.7231	467215	8529.66	0.707569	BelowLOD	0.00640903	0.0373089	10.0207	0.529043	0.0888632	BelowLOD	0.320474	inf	0.337164	0.259582	0.268501	3.20771	0.760821	0.642962	0.630575	0.178976	0.07474	21.2119	1.97091	0.353652	104.657	5.42299	0.205939	212.877	8.43739	0.14517	449.081	14.7426	0.165163	95.5552	2.6165	0.0446428	8849.33	73.0479	0.14115	BelowLOD	21.0625	74.8574
240 - 2.d	30	BelowLOD	333.383	886.518	9.98096	3.47227	5.33101	474105	9758.69	0.599839	BelowLOD	0.0118708	0.064699	9.08022	0.730715	0.0441105	BelowLOD	0.44009	inf	1.28317	0.454174	0.132533	4.25456	1.08067	0.669512	1.10636	0.20509	0.1273	24.3262	2.28722	0.301964	116.883	7.78991	0.186002	241.338	13.3533	0.0988968	535.467	22.2078	0.18706	115.75	4.5419	0.037506	8803.41	116.557	0.0752079	BelowLOD	23.4341	58.3751
240 - 3.d	18.7489	BelowLOD	783.841	1049.15	17.0537	7.00736	4.4281	490192	9697.63	0.719739	0.545512	0.202465	0.0820214	8.65464	1.17547	0.0966919	BelowLOD	2.26788	inf	3.85886	1.44186	0.350106	2.30495	0.75212	0.446952	0.422924	0.204093	0.198495	13.6495	2.18044	0.443507	62.8834	4.96076	0.263395	130.121	7.84722	0.216253	298.303	13.7686	0.274824	63.06	3.11756	0.0669699	9507.73	192.165	0.158906	BelowLOD	29.6168	83.4277
240 - 4.d	30	1198.33	700.017	1152.61	12.2778	3.8719	5.01084	474169	7698.15	0.353137	2.36714	1.16186	0.0591968	13.0219	2.90657	0.0735257	BelowLOD	5.71111	inf	6.46144	2.345	0.0712424	3.03812	0.765283	0.348143	0.658919	0.192945	0.115577	15.2159	1.54493	0.409508	73.18	3.10214	0.228767	163.789	5.53079	0.0708988	424.387	12.9597	0.198881	93.1034	2.43229	0.0618527	8527.39	160.235	0.156795	BelowLOD	34.1164	70.5295
240 - 5.d	30	BelowLOD	421.701	997.97	15.7014	3.65787	5.738	473550	9889.65	0.441881	0.3038	0.165656	0.0313153	17.4344	0.897968	0.101352	BelowLOD	2.10329	inf	4.58267	0.955617	0.32388	10.73	1.40537	0.102192	2.43417	0.328793	0.138635	52.2203	3.29335	0.298228	208.698	7.35951	0.218339	399.44	13.39	0.0617222	822.273	32.0609	0.211723	169.078	6.20253	0.0215744	8344.93	91.7098	0.053199	BelowLOD	21.2464	62.1421
240 - 6.d	30	BelowLOD	324.522	1154.93	6.69163	3.10048	4.88846	469935	8216.41	0.221884	BelowLOD	0.00957741	0.0591	5.22463	0.385832	0.0485521	BelowLOD	1.00917	inf	0.704052	0.323832	0.243027	2.23662	0.645337	0.63586	0.68572	0.174378	0.166696	17.4259	1.45739	0.418463	76.6215	2.14027	0.0292595	154.553	3.01641	0.124365	349.768	8.10519	0.25297	72.8215	1.78063	0.0476	8891.73	111.974	0.128596	BelowLOD	18.6174	39.213
240 - 7.d	30	BelowLOD	345.302	987.857	10.5105	2.92987	3.85934	479400	7123.97	0.375299	0.239166	0.112753	0.0896019	11.6949	0.728266	0.0663049	BelowLOD	1.18112	inf	2.12783	0.580805	0.368304	2.47032	0.715994	0.610656	0.768024	0.205897	0.0847069	20.3473	1.73754	0.338383	98.7914	3.59514	0.197771	229.46	6.36943	0.177036	543.016	15.812	0.171885	119.574	3.10073	0.0367969	8927.3	115.246	0.0738507	BelowLOD	18.476	38.2185
240 - 8.d	30	BelowLOD	364.117	1166.51	746.331	290.275	6.00026	474767	8358.99	1.04967	BelowLOD	0.0372072	0.0772154	9.70095	0.555214	0.0905543	BelowLOD	0.81149	inf	2.18788	0.61845	0.574672	3.66897	0.859981	0.770877	0.676426	0.198188	0.130735	20.8329	1.83447	0.134507	103.356	3.17536	0.160893	211.883	3.74799	0.214961	498.239	11.5435	0.299531	108.08	2.99164	0.0604732	9129.59	126.128	0.189185	96.7878	36.0292	48.6972
240 - 9.d	30	BelowLOD	326.745	965.113	7.20326	2.32919	4.62768	471566	7530.34	0.220758	BelowLOD	0.000910735	0.0184797	10.8688	0.715781	0.112993	BelowLOD	0.156344	inf	BelowLOD	0.249387	0.497545	2.80215	0.659684	0.953433	0.669754	0.168547	0.0350454	19.2416	1.48674	0.221644	93.1692	3.66936	0.0867592	198.056	5.72968	0.134413	464.469	12.9194	0.199713	103.47	3.16435	0.044921	8850.89	95.8073	0.154941	BelowLOD	17.1357	35.4479
240 - 10.d	30	BelowLOD	329.357	781.977	3.83382	2.52329	3.66267	468960	8942.96	0.926499	BelowLOD	0.0261153	0.0553589	8.63733	0.499668	0.0496517	BelowLOD	0.308611	inf	1.82091	0.680479	0.371531	4.91267	0.945727	0.475869	1.11998	0.225715	0.080297	30.688	1.93211	0.415348	137.402	5.6917	0.142595	259.07	8.99329	0.116686	566.578	21.0505	0.271861	120.188	4.20846	0.0380833	8993.63	124.572	0.0925169	BelowLOD	17.1781	37.9514
240 - 11.d	30	1706.81	628.484	1019.21	5.15807	2.69765	3.69031	471319	6985.92	0.49767	3.49523	1.17915	0.0525579	28.0995	4.22165	0.0615063	BelowLOD	2.81444	inf	15.3518	3.70184	0.256236	14.753	1.88413	0.596448	2.83849	0.371416	0.0838389	68.4487	4.27433	0.160642	266.447	9.90856	0.239796	465.759	13.8886	0.12903	961.963	25.8996	0.397994	194.239	5.38231	0.0533962	8753.04	125.844	0.271009	BelowLOD	17.0144	31.9116
240 - 12.d	23.2567	BelowLOD	373.665	865.882	11.7293	5.08889	3.80425	470175	9381.14	0.462881	0.432142	0.141055	0.0593621	11.6066	0.817571	0.0549699	BelowLOD	0.460338	inf	2.92737	0.828176	0.566687	5.1452	1.193	0.419333	1.32448	0.243612	0.117012	29.9483	2.86032	0.386064	147.91	10.1481	0.229063	288.244	14.3166	0.0785231	662.373	28.8197	0.263613	137.261	4.99625	0.0564187	8887.89	159.124	0.171083	BelowLOD	17.4235	43.9132
240 - 13.d	30	BelowLOD	337.735	869.349	7.95434	2.11444	4.03177	469812	7836.26	0.767929	0.245044	0.116295	0.00881979	12.0645	0.728157	0.0644934	BelowLOD	0.461665	inf	3.29466	0.829207	0.388351	4.57359	0.844064	0.196165	0.726796	0.173379	0.0703444	27.0687	1.62228	0.426768	122.251	3.44694	0.139496	250.276	6.39364	0.124458	572.894	13.9737	0.222131	122.277	2.46458	0.0610821	8988.62	121.69	0.245371	BelowLOD	16.1967	33.6607
240 - 14.d	30	BelowLOD	343.361	920.351	BelowLOD	2.0524	4.068	476353	8091.47	0.106396	BelowLOD	0	0.0267925	8.36504	0.553117	0.0672334	BelowLOD	0.0930497	inf	1.02779	0.457683	0.61972	3.45978	0.835984	0.489684	0.789135	0.161211	0.0489365	21.77	1.54531	0.116041	103.913	3.11961	0.125754	216.243	5.80382	0.171544	495.383	12.8495	0.279144	108.72	2.2332	0.0648815	9277.9	79.607	0.118364	BelowLOD	16.6423	40.0946
240 - 15.d	30	BelowLOD	349.609	1071.81	6.55669	2.38522	3.47556	465528	8774.26	0.106541	0.0935631	0.0573473	0.0520308	9.61586	0.513508	0.0450541	BelowLOD	0.314887	inf	2.27422	0.835871	0.476241	4.36154	0.991755	0.382087	1.08412	0.225607	0.086052	21.9321	1.68618	0.263653	105.268	3.5665	0.165575	216.06	3.88327	0.134093	525.014	8.13304	0.178358	114.248	1.944	0.0381662	9021.39	118.706	0.13172	78.7233	28.2754	41.7318
240 - 16.d	23.8086	BelowLOD	462.195	1310.83	21.7162	8.95291	6.37817	460194	11381.9	0.58356	BelowLOD	0.0308259	0.0506056	10.5244	0.70043	0.0919353	BelowLOD	0.27753	inf	2.38679	0.975906	0.317247	3.03398	0.927396	0.495711	0.593342	0.236342	0.101226	16.9325	1.85145	0.485072	81.5583	4.90144	0.323744	186.514	13.4104	0.0849247	441.586	26.1216	0.414099	97.3978	5.96939	0.08483	8865.64	169.155	0.102012	BelowLOD	30.2674	56.9954
240 - 17.d	30	BelowLOD	416.952	1086.15	6.86556	2.31348	4.67828	469275	8152.9	1.11708	0.295695	0.113077	0.067108	11.7667	0.599603	0.0828245	BelowLOD	0.286735	inf	2.44438	0.83982	0.8161	4.39893	1.00882	0.506034	0.839319	0.20822	0.162145	22.4341	1.66379	0.180479	109.157	3.61247	0.168453	225.573	4.54036	0.099272	547.332	12.4999	0.178784	113.748	2.80005	0.0518066	8890.38	119.014	0.27332	49.9808	19.1716	30.2003
240 - 18.d	30	BelowLOD	398.692	838.685	8.3194	2.47767	5.21985	470027	8158.65	1.1783	0.561014	0.249089	0.0663463	16.445	1.03637	0.0471304	BelowLOD	0.39287	inf	3.93232	1.01199	0.53645	4.0942	1.06565	0.543861	1.00754	0.231504	0.133982	27.3439	2.22059	0.308621	137.743	3.68244	0.214191	282.497	5.8781	0.0989199	671.598	14.9572	0.322538	141.763	2.64152	0.0581285	8617.09	122.1	0.182028	47.1697	21.1262	38.8901
240 - 19.d	30	BelowLOD	506.779	1302.36	7.00044	3.09215	4.15064	477561	10255.1	0.8084	BelowLOD	0.0385008	0.0802518	6.76445	0.605435	0.109409	BelowLOD	0.144892	inf	2.41074	0.764985	0.584321	4.30313	1.04557	0.512097	1.31927	0.266779	0.0691645	23.7152	2.36896	0.137107	98.7866	4.42034	0.165325	181.732	6.51784	0.178542	410.999	13.1194	0.418009	84.7184	2.34429	0.0367419	8043.55	84.6237	0.186305	BelowLOD	16.0477	33.9332
240 - 20.d	30	BelowLOD	391.261	862.145	124.394	31.9748	3.36972	478606	6945.91	0.448268	BelowLOD	0.0365229	0.0450004	11.8372	0.725861	0.0295093	BelowLOD	0.122349	inf	4.4918	0.748046	0.41453	6.57578	1.08999	0.266258	1.52235	0.250025	0.0920475	39.8005	2.78439	0.314373	169.733	3.79164	0.120624	321.257	6.31067	0.102565	690.363	15.7605	0.153708	141.211	2.10406	0.0251065	9005.31	105.054	0.123096	62.2309	22.4987	24.271
240 - 21.d	30	BelowLOD	472.466	1423.39	8.36639	3.57378	5.26575	433383	8085.17	0.836736	BelowLOD	0.0191745	0.0814154	12.74	0.802458	0.0994757	BelowLOD	0.0796933	inf	1.42379	0.747146	0.29711	4.59378	1.2273	1.10462	1.05507	0.269367	0.0772558	40.4942	3.06366	0.6298	183.126	5.0814	0.298424	326.159	7.61318	0.143917	641.659	12.3084	0.358269	127.955	2.64366	0.0613658	8062.97	59.6054	0.317112	138.883	25.3421	50.6837
240 - 22.d	30	BelowLOD	495.385	1137.21	4.8254	2.14074	4.24408	457099	8711.51	0.536994	2.14191	0.338917	0.0662009	16.2349	1.09726	0.0661399	BelowLOD	0.341849	inf	7.77608	1.41846	0.705081	3.39741	0.958901	0.23561	0.604044	0.137943	0.112157	16.8387	1.16485	0.471773	78.8727	2.90873	0.173192	171.775	3.14798	0.105945	419.206	7.77074	0.330778	90.7155	1.70148	0.0464405	9081.38	100.277	0.254041	BelowLOD	17.1015	35.925
240 - 23.d	24.0846	BelowLOD	476.356	988.456	80.8969	14.6539	4.00322	475585	6668.58	0.264763	0.172873	0.0825276	0.0221282	9.3437	0.656715	0.081385	BelowLOD	0.302824	inf	16.2421	4.01657	0.217775	26.4446	6.02139	0.533212	6.35081	1.50324	0.0383621	102.301	19.771	0.219556	248.589	34.9516	0.151273	280.392	19.5436	0.160099	555.363	31.1947	0.36715	110.651	2.96668	0.0719231	8934.59	124.935	0.185052	138.453	33.7835	27.5642
240 - 24.d	30	BelowLOD	344.324	778.989	22.1574	4.93721	3.39171	437064	7382.22	5.20688	0.522456	0.14974	0.0691133	13.9391	0.836811	0.0806861	BelowLOD	0.145689	inf	6.27272	1.17839	0.724032	7.52402	1.51238	0.0719012	1.84459	0.327053	0.0832864	33.9127	2.4776	0.572647	151.577	5.51044	0.274608	289.213	7.70571	0.140076	637.165	13.9376	0.178121	134.692	2.30072	0.0553273	8188.29	109.677	0.121387	66.9027	23.051	28.7384
240 - 25.d	23.8546	BelowLOD	513.898	1200.88	9.59686	2.94415	3.7821	484062	9194.77	0.676665	BelowLOD	0.0522627	0.0613006	8.85749	0.557407	0.120707	BelowLOD	0.138044	inf	4.09493	1.27777	0.78807	5.67812	1.22359	0.451474	1.52473	0.332424	0.0197979	30.8913	2.79352	0.581434	128.586	6.34952	0.0369472	240.631	7.47414	0.135473	539.115	13.2922	0.335868	115.283	2.18247	0.0433663	8888.58	156.962	0.215097	120.333	33.5473	38.1545
482
482 - 1.d	30	BelowLOD	439.787	910.983	10.6484	3.18761	2.88076	472714	7769.04	0.515036	0.387253	0.166725	0.0395849	7.61965	0.673521	0.113988	BelowLOD	7.58316	inf	3.94586	0.828695	0.584432	7.576	1.3255	0.212589	0.825622	0.178823	0.102271	34.6594	2.02367	0.167785	104.291	3.22952	0.145603	181.231	3.69896	0.124846	339.963	6.20689	0.27552	66.1356	1.22682	0.0860606	8751.72	135.935	0.103389	74.3147	38.0065	54.3625
482 - 2.d	30	BelowLOD	342.679	939.313	4.10982	1.35447	2.95921	467902	7256.04	0.737295	0.254008	0.0833116	0.0619507	6.6713	0.719434	0.0512118	BelowLOD	2.1391	inf	1.96994	0.574187	0.432713	4.81609	1.03022	0.300528	0.744166	0.19042	0.0934518	24.481	1.80207	0.4305	83.2867	2.62206	0.178065	142.959	2.76403	0.171358	284.374	6.29816	0.118309	54.775	1.17486	0.0301263	8951.83	175.59	0.0239988	118.124	36.8983	56.0201
482 - 3.d	21.3707	BelowLOD	538.974	1159.69	8.0036	2.1652	3.30574	480365	9771.16	0.283085	32.4366	13.0432	0.0481753	75.1449	27.9607	0.0752433	BelowLOD	88.9057	inf	38.2529	12.5868	0.539289	10.8401	2.67013	0.908829	0.444895	0.180936	0.0966309	24.4457	2.47981	0.424516	81.5727	4.9491	0.0728571	140.138	6.08022	0.122678	297.147	9.48982	0.264009	60.1301	2.055	0.0664825	9760.58	134.669	0.244635	147.95	54.7853	78.6424
482 - 4.d	30	BelowLOD	298.279	1049.86	3.70143	1.39145	2.56146	468296	8101.88	0.950456	0.0699257	0.0432976	0.0652275	6.81013	0.4797	0.0688251	BelowLOD	1.32984	inf	2.95237	0.773961	0.287513	4.91458	1.04833	0.315896	0.52632	0.126836	0.10959	24.5058	1.69545	0.364796	85.3628	2.39222	0.214784	163.233	3.49543	0.113949	330.584	5.29149	0.260781	67.4931	1.23221	0.0473688	8578.73	67.4206	0.267257	97.7633	39.1422	72.837
482 - 5.d	30	BelowLOD	373.49	1189.1	3.8323	1.33444	2.55555	468538	7487.59	0.463812	0.382039	0.135874	0.00915841	11.0471	0.632872	0.0473167	BelowLOD	1.12479	inf	2.73141	0.68948	0.320957	3.67141	0.787422	0.124778	0.313953	0.129354	0.106166	20.1821	1.74961	0.455439	81.3409	2.80652	0.217897	156.697	4.23432	0.167962	336.464	8.76761	0.206166	66.4851	1.80806	0.0362817	10003.2	130.794	0.132998	BelowLOD	32.7609	55.0372
482 - 6.d	30	BelowLOD	425.642	1050.46	11.8887	2.37353	2.49227	466685	8805.56	1.48654	0.911768	0.231715	0.0670468	13.7471	1.50861	0.0830989	BelowLOD	2.59004	inf	5.87075	1.20026	0.160625	7.16733	1.23245	0.308365	0.806659	0.170273	0.089045	27.5281	2.2881	0.298894	91.1958	3.68217	0.267325	157.981	4.13504	0.122114	326.508	8.38263	0.109493	64.2954	1.81063	0.055383	10067	131.179	0.242435	117.391	48.2833	76.7247
482 - 7.d	30	BelowLOD	402.115	1219.15	9.2541	1.91226	5.03676	460869	7610.55	1.16924	0.834302	0.214816	0.0946282	14.5234	1.2319	0.0678498	BelowLOD	3.83678	inf	10.4149	2.43682	0.189302	8.5159	1.33109	0.330375	0.741726	0.182279	0.217925	34.4142	2.99275	0.824265	110.833	4.46742	0.193373	194.522	4.74246	0.125093	381.052	8.59045	0.179274	75.2538	1.79978	0.0886018	8210.21	96.1984	0.361805	93.9535	54.8978	73.3646
482 - 8.d	30	BelowLOD	344.264	661.361	8.09551	1.57642	2.8702	462152	8604.12	0.674972	BelowLOD	0.000847482	0.0750836	7.2997	0.442286	0.0564702	BelowLOD	0.592015	inf	4.89332	1.05211	0.772772	8.45285	1.29844	0.118281	1.94702	0.323468	0.0157365	34.601	3.84684	0.399749	106.099	8.6054	0.138337	165.496	12.9878	0.0894962	319.882	23.4092	0.132979	62.4116	4.58417	0.0525398	9406.12	148.404	0.20201	125.734	35.7046	55.1322
482 - 9.d	30	BelowLOD	398.093	943.517	7.77944	1.71763	3.06635	468934	10032.1	0.83637	BelowLOD	0.00112583	0.0428676	3.86265	0.285674	0.0554886	BelowLOD	0.0844505	inf	0.496175	0.337707	0.485428	2.04573	0.458317	0.472894	0.368143	0.116375	0.122162	10.9048	1.25556	0.298193	41.6829	1.78543	0.178985	70.954	1.83729	0.188626	141.704	3.39598	0.221416	29.4938	0.772368	0.029001	8300.94	77.0608	0.119515	160.889	43.0755	61.5476
482 - 10.d	30	BelowLOD	509.93	890.943	5.62319	2.24576	2.30183	472173	8476.99	0.114689	3.18228	2.3486	0.0667443	17.1138	7.19385	0.0369656	BelowLOD	4.76038	inf	7.31712	2.48447	0.566255	4.18825	1.04744	0.348378	0.353299	0.11851	0.0364803	17.081	1.45719	0.264503	61.3785	2.11465	0.124761	110.285	2.62964	0.0969303	231.931	5.3034	0.159512	44.8345	1.3044	0.0540191	8942.16	105.299	0.136381	111.605	40.3358	75.1064
482 - 11.d	15.943	BelowLOD	726.681	1837.09	10.4254	3.18002	4.25438	456042	13214.2	0.885092	BelowLOD	0.081055	0.177489	5.21934	0.433016	0.107512	BelowLOD	0.368262	inf	1.52203	0.878852	0.334641	3.1673	1.47673	0.518103	0.69706	0.26092	0.121915	15.4088	2.4921	0.499829	57.0972	4.15759	0.209017	95.5364	3.99422	0.29895	190.905	8.78333	0.521346	38.0448	1.39638	0.114957	7832.86	81.8386	0.228472	108.231	59.9412	83.7398
482 - 12.d	30	BelowLOD	475.388	925.261	5.41426	1.72623	3.15403	457555	8939.08	0.596753	4.01173	1.55347	0.0474402	24.1307	4.0555	0.00992377	BelowLOD	2.09687	inf	11.2876	2.97837	0.684346	7.20631	1.32229	0.269101	0.654554	0.165491	0.127215	33.2881	2.41365	0.37272	106.423	3.71026	0.0283479	186.359	5.32052	0.102859	371.803	8.11258	0.207021	74.7861	1.53537	0.0151565	10653.7	226.254	0.0520227	117.615	34.7299	50.759
482 - 13.d	30	BelowLOD	297.785	1071.21	12.7227	3.11098	2.77754	449897	9612.47	0.0999811	0.424722	0.182111	0.0617581	14.654	1.04597	0.0585952	BelowLOD	0.538301	inf	5.51109	1.06666	0.298016	8.66368	1.21023	0.168251	1.0458	0.185121	0.100245	34.8576	2.42123	0.416698	116.96	3.20318	0.167752	206.976	4.0402	0.173207	426.41	8.99606	0.280827	84.694	2.14342	0.0531018	9816.41	108.196	0.174288	146.625	42.6706	53.8938
482 - 14.d	30	BelowLOD	340.457	834.815	5.30073	1.31346	3.12181	463311	7907.59	0.848665	BelowLOD	0.0100497	0.0536555	11.8234	0.620994	0.0884773	BelowLOD	0.116487	inf	2.49744	0.636882	0.166691	6.15787	0.887418	0.342643	0.539811	0.145604	0.081036	29.2365	1.80557	0.050983	98.2644	2.6205	0.225312	179.419	3.79279	0.0775611	351.728	7.15484	0.0637934	69.035	1.48876	0.00636435	9988.11	66.2397	0.100216	71.7119	28.0203	54.5028
482 - 15.d	20.2668	BelowLOD	467.841	884.55	7.81737	2.45189	2.91387	471520	8632.93	0.902319	0.305966	0.134822	0.0557154	9.36441	1.05185	0.0199584	BelowLOD	0.317607	inf	4.22299	1.15326	0.056944	4.81168	1.369	0.290053	0.819375	0.216776	0.0783619	21.1706	2.66046	0.218953	73.1188	6.07463	0.167886	138.268	7.91932	0.1357	309.115	13.7557	0.202268	63.4575	2.0816	0.0571597	8918.03	123.899	0.17862	67.7212	39.8204	56.9851
482 - 16.d	30	BelowLOD	323.417	1024.27	10.1598	2.6509	2.64038	464865	7997.65	0.487408	1.14798	0.345501	0.0372893	13.5715	1.59055	0.0835192	BelowLOD	0.754047	inf	7.51652	1.52298	0.121676	8.42242	1.32744	0.61915	0.788329	0.147371	0.0997515	29.519	1.99807	0.226554	103.56	2.60669	0.234882	186.175	3.56747	0.127444	374.359	6.91375	0.030602	75.0387	1.4494	0.0465075	9280.48	75.0429	0.0225726	88.6076	37.5592	47.2096
482 - 17.d	15.345	BelowLOD	454.189	951.299	9.40231	4.56735	2.78695	493016	9402.39	0.780585	1.68685	0.421644	0.0725145	22.7646	1.39178	0.0527891	BelowLOD	0.320376	inf	5.01649	1.20245	0.518269	5.89608	1.19737	0.319506	0.475035	0.18592	0.139261	27.3311	2.88479	0.496614	106.376	5.02899	0.230871	186.641	6.36477	0.162062	370.425	9.01502	0.266547	72.8309	1.51738	0.0634375	11393.6	166.608	0.208243	57.908	41.2813	51.5179
482 - 18.d	30	BelowLOD	389.872	981.282	18.6109	3.39757	4.06559	462174	7613.68	0.555492	0.835052	0.263895	0.00909693	14.3965	1.64517	0.113064	BelowLOD	0.83838	4.25905	8.12728	1.67336	0.399924	8.38519	1.61137	0.12606	1.32948	0.293111	0.0997939	40.9904	3.7425	0.118312	123.235	7.77637	0.18307	192.291	10.9014	0.10756	373.929	17.9968	0.19588	72.107	3.68403	0.0453954	9589.36	213.315	0.231501	BelowLOD	20.812	52.3316
482 - 19.d	30	BelowLOD	337.433	974.362	5.65754	1.91504	2.82553	459256	8298.06	0.908102	BelowLOD	0.0106398	0.0261218	8.15227	0.490956	0.0516718	BelowLOD	0.100297	1.7897	1.37799	0.468705	0.289876	3.34402	0.717824	0.16982	0.473396	0.14844	0.072621	20.1235	1.42423	0.493298	72.8148	2.60236	0.232565	133.455	3.28846	0.113195	273.724	4.78939	0.303136	54.4823	1.29359	0.0241886	9193.6	93.3233	0.117949	BelowLOD	20.1566	54.0964
482 - 20.d	30	BelowLOD	549.709	875.491	11.474	2.731	4.43435	465550	7872.49	0.784082	1.1767	0.415796	0.0500631	10.6796	1.60498	0.0729629	2.12523	0.652965	0.881605	6.60853	1.81312	0.340436	7.87241	1.6652	0.286282	0.611782	0.183019	0.054105	21.0677	1.98873	0.613364	66.7166	2.82797	0.200211	116.429	3.1015	0.219411	234.512	5.0713	0.353547	45.7888	0.979748	0.0168984	8746.73	89.6529	0.20239	49.9912	27.6888	48.003
482 - 21.d	30	BelowLOD	524.244	1158.55	7.9932	2.81819	4.20413	462416	8372.12	1.08935	1.83839	1.05545	0.0643557	15.1742	1.57498	0.0869409	1.57047	0.614511	0.765646	4.67399	1.41808	0.711322	4.97253	1.23859	0.318005	0.323045	0.151054	0.174567	23.6348	2.36469	0.296051	87.4643	4.19551	0.278737	162.258	4.9033	0.121566	337.071	9.87989	0.32322	68.253	2.02188	0.0693851	9932.12	182.993	0.180324	70.4742	28.9598	65.446
482 - 22.d	30	BelowLOD	322.499	915.617	BelowLOD	1.811	4.54303	479446	7238.15	0.973207	0.128064	0.0659455	0.0604291	9.70878	0.481331	0.0956716	BelowLOD	0.14943	0.522198	1.8538	0.503102	0.454149	3.25566	0.720688	0.365332	0.55351	0.154497	0.102821	18.3021	1.46423	0.169114	68.8514	2.16603	0.0286538	136.407	2.27568	0.132832	308.358	5.29206	0.285751	62.9597	0.967546	0.0517198	9294.4	102.238	0.0525218	59.6138	30.1505	44.9652
482 - 23.d	19.8528	BelowLOD	496.504	1218.99	26.1139	11.3494	3.70869	480654	9248.29	0.398836	0.515665	0.283454	0.0674209	16.1318	1.64864	0.0251363	1.4848	0.816934	0.254197	6.28887	2.37245	0.418037	8.0197	1.06846	0.396521	0.577791	0.226495	0.0814618	36.6116	2.83742	0.51509	121.94	6.4215	0.184087	209.57	9.19688	0.100791	413.515	13.1666	0.0384563	79.8201	2.06032	0.0393766	10090.3	169.413	0.1707	69.304	39.8575	55.5603
482 - 25.d	30	BelowLOD	398.197	795.706	9.19718	3.16255	4.27681	465394	7873.45	0.459888	1.23625	0.403435	0.0595475	10.1209	1.52344	0.00979529	1.27505	0.449322	0.154706	2.77593	0.967174	0.375257	3.59151	0.864861	0.566631	0.383638	0.119217	0.0876904	14.7563	1.40457	0.30055	49.7749	2.19916	0.0601505	93.7872	3.29088	0.187061	192.461	5.14723	0.19405	38.1746	0.995514	0.0624246	9333.86	95.7001	0.156883	62.7524	24.6688	57.5627
483
483 - 1.d	30	BelowLOD	361.533	1055.94	12.8118	2.40237	3.02288	466699	10799.9	0.10848	0.473404	0.375548	0.0667531	11.5984	1.3134	0.0784632	0.846343	0.443032	0.387186	1.99425	0.85439	0.436381	3.14083	0.78326	0.370951	0.259223	0.113885	0.0831408	13.8943	1.41835	0.496016	59.394	2.49997	0.191172	109.841	2.89677	0.109703	221.996	4.98628	0.155633	42.1291	1.09366	0.0362079	9082.5	104.471	0.124401	BelowLOD	24.221	48.248
483 - 2.d	30	BelowLOD	365.176	1018.51	9.08936	2.14847	3.247	460782	7914.04	0.508533	0.520582	0.237794	0.0193874	15.8193	1.0612	0.047095	BelowLOD	0.257466	0.67376	2.37157	0.703646	0.0545942	5.31753	1.03832	0.337205	0.161292	0.0911761	0.0763275	25.9039	2.04083	0.260313	109.151	3.44292	0.13412	192.623	3.17728	0.120815	379.518	7.54835	0.0698692	71.9705	1.3009	0.0299853	9649.98	109.401	0.202885	BelowLOD	19.4871	53.2903
483 - 3.d	30	BelowLOD	374.662	902.218	25.4742	3.4312	4.40111	468928	7760.03	0.572257	1.57313	0.247199	0.0758417	13.8161	0.908933	0.0794207	3.20269	0.57696	1.06919	8.19178	1.3585	0.170448	9.10132	1.41262	0.262448	0.652316	0.145515	0.146528	35.3612	2.85119	0.587118	110.344	5.17458	0.220026	171.607	6.30704	0.0981719	323.376	9.78617	0.26714	60.9327	1.53894	0.0375145	9006.53	118.276	0.170717	BelowLOD	31.6423	47.2571
483 - 4.d	30	BelowLOD	358.501	1086.45	7.88813	3.18508	3.19231	463377	8567.76	0.853559	0.113227	0.0777346	0.112851	13.9342	0.635361	0.0674185	BelowLOD	0.15125	0.680676	1.53377	0.484442	0.289865	2.95644	0.742678	0.291489	BelowLOD	0.101778	0.118455	18.2758	1.76547	0.273623	73.5468	2.141	0.301283	134.61	2.74218	0.182509	271.955	4.86257	0.196023	51.982	1.03048	0.0514422	9494.53	118.969	0.133307	BelowLOD	23.8615	66.823
483 - 5.d	30	BelowLOD	284.55	1033.86	14.0064	3.45452	3.40498	469789	5953.98	0.227488	0.17014	0.107763	0.0563974	12.2057	1.29257	0.0423775	1.24427	0.568623	0.549807	2.54356	0.977478	0.277192	3.90879	1.1657	0.155261	0.10957	0.0813982	0.0825422	15.3742	2.08458	0.298338	58.8862	5.38444	0.101874	102.301	5.72919	0.134591	224.005	11.9537	0.295998	42.7175	1.93372	0.0644364	10562.7	96.393	0.153719	BelowLOD	25.5945	49.0802
483 - 6.d	30	BelowLOD	303.93	852.074	21.0342	3.4825	4.07839	466919	8688.49	0.565667	0.13656	0.0610285	0.0477332	4.28796	0.400478	0.0835766	0.823925	0.32588	0.12943	2.69602	0.759435	0.489772	4.03611	1.06889	0.573448	0.27152	0.123793	0.0997675	17.2471	1.77169	0.401679	63.6817	4.31651	0.115151	111.918	6.82335	0.0478335	241.741	15.3119	0.240776	47.7409	3.07886	0.0373315	9817.79	215.652	0.177519	71.8519	30.9146	41.6466
483 - 7.d	30	BelowLOD	348.298	944.006	8.74795	2.46183	3.32874	469686	7856.99	0.955939	BelowLOD	0.0397003	0.0715947	14.8254	0.614607	0.0665565	0.436191	0.171859	0.420436	1.45837	0.451362	0.198271	2.48378	0.709018	0.451358	0.190816	0.0975008	0.125735	20.3832	1.88725	0.304296	87.6375	3.31293	0.123312	156.912	4.52283	0.2034	315.858	7.12705	0.226241	61.3373	1.68816	0.0366476	9669.27	117.553	0.210384	81.4303	25.4534	53.9068
483 - 8.d	30	BelowLOD	381.669	990.269	7.51106	2.59545	4.43357	457581	7528.13	0.658384	0.128838	0.0614642	0.0479529	11.5932	0.756569	0.0551962	BelowLOD	0.207163	1.30431	1.13208	0.406663	0.187245	3.03232	0.712151	0.374602	BelowLOD	0.0675511	0.0896614	18.18	1.59552	0.446069	82.8273	2.50744	0.333427	157.151	3.84175	0.158032	309.828	8.18677	0.267972	60.2337	1.58089	0.0244593	10040	114.661	0.12029	BelowLOD	27.8061	52.3351
483 - 9.d	30	BelowLOD	693.081	993.379	35.2011	10.745	4.3423	471245	10810.5	1.2658	9.04584	3.22253	0.0469025	46.57	10.3857	0.0573366	18.9277	5.90403	1.82932	25.9412	8.34417	0.58141	15.2161	2.89739	0.316275	0.273764	0.135217	0.123572	38.2645	3.95763	0.599464	139.104	5.08148	0.21566	231.593	4.39836	0.158133	470.196	11.5117	0.248774	88.3701	2.19068	0.0573187	10358.9	112.131	0.261656	279.114	55.9443	69.6971
483 - 10.d	30	BelowLOD	334.614	881.776	14.7026	3.7867	3.64853	466758	9436.95	0.537726	0.0540605	0.0376407	0.0418209	10.768	0.621797	0.029846	BelowLOD	0.245136	2.06256	1.52096	0.455197	0.273774	5.48346	0.919812	0.108099	BelowLOD	0.059371	0.124434	35.4637	2.24768	0.622919	138.539	3.68687	0.211147	250.67	4.8651	0.130406	499.839	8.66395	0.179158	93.0557	1.50757	0.0418745	10719	129.13	0.151242	BelowLOD	21.25	63.1293
483 - 11.d	30	BelowLOD	363.287	803.681	8.96614	2.67377	4.36082	469056	7537.62	0.498977	0.0269213	0.0221606	0.0189893	8.03822	0.476269	0.0515104	BelowLOD	0.322784	35.315	0.96841	0.394706	0.373018	3.56457	0.819167	0.52668	BelowLOD	0.0461668	0.102533	18.4324	1.52575	0.40503	78.662	2.32753	0.134656	134.405	3.27166	0.0427184	268.814	5.70041	0.244523	50.5299	1.06203	0.0333142	9830.06	95.261	0.10339	BelowLOD	28.1225	59.3915
483 - 12.d	30	BelowLOD	431.322	957.987	8.22333	2.27716	4.50553	465143	7985.92	0.22406	1.29826	0.434409	0.0263948	12.4584	2.05709	0.0215644	BelowLOD	1.62653	inf	9.46728	1.74811	0.350894	10.9552	1.6372	0.108516	0.479673	0.146845	0.144013	52.8662	2.7568	0.258118	189.597	3.42593	0.156729	315.74	4.72919	0.103111	576.741	6.29449	0.238341	106.195	1.53886	0.0422462	10477.6	119.066	0.133279	BelowLOD	25.5658	58.7033
483 - 13.d	30	BelowLOD	321.719	690.071	10.718	2.77074	4.0788	483561	8088.54	0.546308	0.06908	0.0694258	0.0563074	9.33019	0.533945	0.0546096	BelowLOD	0.244204	inf	1.16703	0.465471	0.190702	3.44723	0.818661	0.314382	0.193639	0.0896993	0.0969848	14.6098	1.30915	0.337226	61.392	1.83881	0.120577	111.281	2.6378	0.134771	221.103	4.57813	0.228399	43.0084	0.900961	0.033034	8885.1	118.377	0.0238042	56.1146	24.6744	49.6171
483 - 14.d	30	BelowLOD	387.676	867.654	7.2337	2.34837	3.94073	471251	7858.91	0.483518	BelowLOD	0.01965	0.0540182	12.7934	0.503088	0.0777884	BelowLOD	0.159609	inf	1.34271	0.455762	0.336366	3.19437	0.709399	0.332181	BelowLOD	0.0520133	0.0813085	25.4986	2.12141	0.302904	111.859	3.75843	0.141138	213.785	6.47433	0.069863	411.967	12.3609	0.18945	76.587	2.2878	0.0426952	10808.3	78.605	0.266944	68.2734	23.6746	50.3677
483 - 15.d	30	BelowLOD	341.358	900.925	12.5571	3.31402	4.31237	466574	8745	0.223539	0.133536	0.0715103	0.0318473	13.4629	0.729307	0.010076	BelowLOD	0.446137	inf	2.37496	0.600119	0.480107	5.11117	0.776389	0.109464	0.592618	0.169922	0.0784771	35.4699	2.79368	0.299207	127.347	8.57862	0.166541	212.479	11.009	0.0200513	388.654	16.6553	0.136654	72.7081	2.97414	0.0336551	8809.99	129.747	0.195773	88.9002	35.6583	72.0663
483 - 16.d	30	BelowLOD	423.84	905.27	34.1162	8.83173	3.95055	472910	9832.85	0.397873	2.43655	0.41519	0.047545	19.8052	1.45164	0.064367	BelowLOD	2.00895	inf	7.27339	1.19296	0.20572	5.97202	1.12684	0.242796	0.181625	0.0942478	0.102393	22.3571	2.63654	0.0571076	80.5581	3.6221	0.227447	140.527	5.42191	0.110134	278.165	8.22482	0.210162	53.0495	1.29094	0.0889099	9524.48	148.054	0.346546	154.063	50.6035	96.123
483 - 17.d	30	BelowLOD	850.828	1533.36	27.1411	6.70386	7.83714	457646	10200.5	0.755182	2.57953	0.724735	0.0586101	26.9235	2.98946	0.147449	BelowLOD	3.62292	inf	8.76003	1.89779	0.23041	8.86856	1.67066	0.597676	BelowLOD	0.0826411	0.195361	31.3603	3.29262	0.528888	128.676	4.78346	0.316286	225.047	8.21484	0.104995	451.629	14.785	0.373404	88.0733	3.45295	0.0591451	10135.8	117.082	0.324284	225.199	74.0921	102.023
483 - 18.d	30	BelowLOD	297.438	891.343	1521.24	528.1	4.1316	464268	7561.91	0.665614	1.06392	0.203753	0.0428243	19.9224	0.935032	0.0665318	BelowLOD	1.31278	inf	3.09986	0.608011	0.344323	4.1832	0.73909	0.296022	BelowLOD	0.0813397	0.0771422	21.418	2.02025	0.157938	90.4791	2.20623	0.176395	165.636	2.53125	0.147297	337.631	5.66749	0.153336	62.3549	1.10895	0.0356407	9717.23	103.275	0.102096	BelowLOD	29.9519	86.1478
483 - 19.d	30	BelowLOD	325.319	883.598	12.7001	3.47923	4.05438	475687	8558.03	0.775825	0.0963583	0.0811027	0.0414479	11.1564	0.6593	0.0524065	BelowLOD	0.459456	inf	1.06788	0.310931	0.256916	2.5078	0.696914	0.268123	0.199512	0.0890636	0.0718027	15.5269	1.30287	0.257674	66.6519	2.10807	0.278014	119.994	2.44553	0.0964114	240.118	4.99641	0.261939	45.9565	0.771013	0.0338708	8893.47	119.066	0.0525982	BelowLOD	31.4139	70.514
483 - 20.d	30	BelowLOD	252.876	1035.17	13.1952	3.21533	4.68139	469349	6705.63	0.482989	BelowLOD	0.0119591	0.0653971	9.50661	0.508318	0.0479378	BelowLOD	0.223426	inf	0.555971	0.254994	0.338847	2.67489	0.689526	0.245067	BelowLOD	0.0650013	0.104679	14.5092	1.39918	0.338693	64.7061	1.97351	0.147446	116.39	2.32904	0.110795	232.226	4.15221	0.313312	45.3899	0.90422	0.111427	9399.86	88.7812	0.14588	78.385	31.9144	71.6361
483 - 21.d	30	BelowLOD	356.933	1012.96	15.0032	3.23974	4.1865	470412	9880.45	0.768578	BelowLOD	0.0277501	0.0555364	11.9993	0.481101	0.0426979	BelowLOD	0.76043	inf	5.41433	0.841378	0.38622	12.4171	1.50021	0.27361	0.612502	0.157312	0.0163392	59.6488	2.88629	0.396584	214.728	4.39827	0.0606017	343.198	5.74829	0.13929	608.819	9.37482	0.0976163	115.64	1.89678	0.0288802	8159.71	97.6931	0.099361	BelowLOD	30.1158	75.6837
483 - 22.d	30	BelowLOD	360.814	656.487	832.458	209.194	5.02412	464659	8606.35	0.478668	0.113186	0.0595452	0.0556799	16.9585	0.857381	0.0608463	BelowLOD	1.09091	inf	2.27023	0.553998	0.233722	4.64369	1.05828	0.218126	0.106726	0.0546878	0.0862407	22.379	2.11581	0.486032	97.5326	4.55961	0.104566	171.254	6.25776	0.182391	334.812	9.51226	0.209282	64.2678	1.97015	0.0366782	10350.5	104.924	0.167138	150.438	48.5315	63.7076
483 - 23.d	30	BelowLOD	289.328	881.774	BelowLOD	2.56081	5.0202	469403	8049.04	0.647811	BelowLOD	0.000671727	0.0556317	11.451	0.568892	0.060488	BelowLOD	0.389394	inf	1.30896	0.441409	0.316227	5.69305	0.799361	0.291051	BelowLOD	0.0281743	0.0998741	29.5893	2.0492	0.353156	134.774	3.28514	0.104015	247.616	4.36648	0.12711	490.696	6.75808	0.319693	92.6567	1.49813	0.0586052	11217.1	83.7718	0.187282	BelowLOD	27.5622	76.3302
483 - 24.d	30	BelowLOD	356.999	875.095	27.6956	4.58083	4.07177	470446	8225.75	0.341119	0.461288	0.124571	0.0525616	12.279	0.893252	0.03435	BelowLOD	1.25498	inf	3.32215	0.820985	0.276125	6.56115	1.23511	0.565057	0.243278	0.127784	0.115758	24.228	2.29493	0.505178	97.5118	5.66216	0.140419	166.211	6.7401	0.0229577	317.78	11.0383	0.161751	61.8054	2.14617	0.0444574	9157.44	85.1034	0.11933	BelowLOD	33.1874	85.432
483 - 25.d	30	BelowLOD	352.322	792.205	28.9489	5.17212	4.24152	468649	7057.26	0.535792	0.57206	0.158563	0.0523452	16.4965	0.707944	0.0663323	BelowLOD	1.11925	inf	3.68211	0.696426	0.391704	5.23602	0.789435	0.51401	0.0826261	0.0812551	0.0749028	22.7215	1.52065	0.240697	95.3393	2.31127	0.197888	162.174	2.65573	0.100725	333.187	6.21121	0.362008	62.5465	1.26155	0.0468018	10847.4	102.015	0.121532	BelowLOD	32.7358	74.7332
483 - 26.d	30	BelowLOD	273.795	800.841	16.1854	3.30932	5.05667	465692	7523.8	0.223921	BelowLOD	0.0215115	0.0451286	12.651	0.70007	0.0316092	BelowLOD	0.456782	inf	1.31403	0.46481	0.285674	3.10315	0.624685	0.253046	0.194505	0.092156	0.130818	21.2783	1.79287	0.267049	89.2441	2.72372	0.165985	159.764	2.99584	0.205592	310.706	6.1522	0.149046	59.8834	0.827314	0.0507835	9202.64	65.9678	0.153695	BelowLOD	29.3493	80.5763
483 - 27.d	24.6826	BelowLOD	306.717	811.465	28.2995	5.30442	4.72993	482909	9582.41	0.104808	BelowLOD	0.0168772	0.0320323	3.97954	0.453368	0.0226679	BelowLOD	0.237886	inf	1.28195	0.440597	0.414256	3.27293	0.932425	0.0868812	0.294602	0.12688	0.110434	17.8864	2.07351	0.355011	70.0467	4.09248	0.23833	112.815	6.30498	0.0773214	220.268	8.92468	0.191742	41.4586	2.05447	0.032025	8427.71	86.8331	0.15415	BelowLOD	30.6941	80.6464
483 - 28.d	30	BelowLOD	404.588	999.554	48.0022	9.04557	9.58707	469819	10080.4	0.549581	0.394825	0.115569	0.0706617	9.35761	0.86422	0.0553543	BelowLOD	1.20943	inf	4.07952	0.824703	0.503653	5.70581	1.01182	0.52285	0.733378	0.19096	0.101672	30.7311	2.54912	0.569456	103.741	3.5105	0.0792875	158.894	5.66869	0.177689	309.139	6.79981	0.290438	58.9546	1.69861	0.0788724	8978.3	147.935	0.435323	296.7	70.7808	92.4118
483 - 29.d	30	1085.93	509.887	1007.04	14.4824	4.92239	6.26227	476070	8169.58	0.665088	6.95818	1.47519	0.0321221	28.5951	4.8922	0.0688783	BelowLOD	7.48684	inf	18.3657	3.84006	0.529455	8.5543	1.34923	0.394868	BelowLOD	0.0446752	0.0825258	34.5771	2.56083	0.202731	130.928	4.99849	0.25005	220.368	5.93223	0.11645	406.812	8.83708	0.320564	78.6487	1.468	0.0381627	10253.6	116.338	0.167776	BelowLOD	30.7893	68.4595
483 - 30.d	30	BelowLOD	313.983	933.793	15.4023	3.12119	3.67973	472901	9781.7	0.519928	BelowLOD	0.0169043	0.0350241	15.014	0.541629	0.0665484	BelowLOD	1.15915	inf	8.80115	1.07298	0.446496	16.6917	1.52171	0.471904	0.815266	0.159552	0.100574	80.0193	2.67838	0.195912	276.36	5.65667	0.105318	430.068	5.89182	0.157252	749.286	9.75591	0.219806	139.995	1.84116	0.0575706	8593.17	114.036	0.255182	88.3324	27.2777	56.3316
506
506 - 1.d	30	BelowLOD	327.436	973.284	6.23089	3.20281	4.5948	452695	6944.02	0.325026	BelowLOD	0.000884254	0.0400494	15.051	0.868523	0.0445779	BelowLOD	0.106344	inf	11.0276	2.11509	1.29161	9.36136	1.4204	0.809161	1.55748	0.276161	0.102447	30.5158	2.32773	0.286337	142.072	7.19178	0.2251	243.55	10.8921	0.0865372	476.836	21.1569	0.304714	93.6408	4.15471	0.0428888	9922.17	110.243	0.0957847	76.5412	29.6065	47.0537
506 - 2.d	30	BelowLOD	425.997	840.261	13.1298	3.13141	6.09032	455601	7955.09	0.507923	0.87798	0.28644	0.0380479	10.4987	1.23598	0.0700621	BelowLOD	0.410968	inf	28.9289	4.25475	1.34004	11.5549	1.63876	0.558914	1.82943	0.28947	0.0798997	33.9532	2.10075	0.0829189	129.961	6.2047	0.177022	192.768	7.94872	0.0856294	344.148	11.993	0.22928	65.7466	2.43037	0.020128	9007.19	94.4026	0.226019	70.943	34.9949	47.4111
506 - 3.d	30	BelowLOD	405.323	999.059	6.00721	3.16206	3.96398	445132	7353.76	0.0903101	BelowLOD	0.0102724	0.0471543	15.6084	0.634694	0.0502796	BelowLOD	0.0941953	inf	7.80454	2.01067	1.84726	6.03538	0.969981	0.54888	0.618508	0.134924	0.0366202	21.8182	1.49711	0.215721	118.592	3.09471	0.178931	209.522	4.03479	0.0976154	419.242	10.7717	0.195233	87.1271	2.75014	0.0394603	10526.8	82.7327	0.18284	55.9189	26.8058	44.9775
506 - 4.d	30	1512.39	575.509	945.705	16.0909	3.2409	5.40396	458266	6752.87	0.632453	1.08408	0.294093	0.024098	18.2974	1.54979	0.0650387	BelowLOD	0.567014	inf	28.0263	5.37088	1.66658	10.4554	1.5792	0.377436	3.13842	0.335766	0.106906	32.8008	1.81031	0.299083	132.465	4.6569	0.177013	228.705	6.30726	0.123262	481.223	11.391	0.0919219	98.1668	2.24551	0.040253	8831.68	79.6094	0.147883	51.4855	19.7839	50.683
506 - 5.d	30	BelowLOD	408.698	1132.87	19.5432	3.95135	5.61103	455155	7702.16	0.524206	0.655215	0.156915	0.0419145	9.05721	0.756412	0.0634114	BelowLOD	0.279238	inf	18.3847	3.22522	1.50057	11.2021	1.47612	0.28145	1.4434	0.23694	0.15005	28.0894	1.69279	0.310278	115.189	2.45282	0.0884011	180.809	4.04988	0.144687	347.69	6.78624	0.159594	69.9815	1.31959	0.0594495	10114.6	148.436	0.158587	73.1172	37.7338	54.8813
506 - 6.d	30	1239.52	667.362	1180.31	5.56367	3.45462	5.02744	454582	8811.14	0.724287	4.05137	1.49191	0.0410444	27.9756	4.01948	0.0750668	BelowLOD	1.2736	inf	22.3076	7.66735	1.46837	3.82973	0.84003	0.532277	0.245627	0.107652	0.121362	12.3527	1.1886	0.18833	63.7263	1.87031	0.140289	127.148	3.23987	0.0977022	279.787	5.0893	0.159836	60.2767	1.19271	0.0810395	11406.7	107.422	0.127927	80.5225	27.2395	43.7335
506 - 7.d	30	BelowLOD	387.746	880.751	17.7154	3.61252	4.26138	455880	8298.47	0.83196	0.538873	0.127044	0.0331825	15.0543	0.695255	0.0722053	BelowLOD	0.214371	inf	15.4664	2.21068	0.195292	10.5954	1.18809	0.556216	1.53506	0.244969	0.0945806	33.1078	1.39204	0.247627	136.262	2.75658	0.138631	218.708	3.6047	0.147532	427.931	9.3546	0.193226	85.9682	1.55428	0.0143936	9344.27	121.813	0.144746	52.9157	23.1012	51.6797
506 - 8.d	30	BelowLOD	302.815	654.12	8.75202	3.01043	4.62036	446612	6757.5	0.407998	0.177159	0.0764735	0.053964	13.052	0.557256	0.0666495	BelowLOD	0.176233	inf	17.9295	2.66207	0.845819	11.343	1.46932	0.627935	1.81312	0.247173	0.123041	35.9207	1.65509	0.236762	147.205	4.18361	0.132069	238.613	5.16665	0.154437	444.368	8.15204	0.138853	88.0442	1.37381	0.023191	9354.23	115.883	0.172419	70.1284	28.7516	38.8028
506 - 9.d	30	BelowLOD	364.988	941.669	4.34443	2.59802	3.54748	453776	8670.8	0.0893791	0.0858596	0.0553369	0.0232976	11.6691	0.555927	0.0673108	BelowLOD	0.0898447	inf	3.22247	1.11379	1.17004	2.7067	0.688235	0.383322	0.219578	0.0952603	0.108711	10.6615	1.04316	0.0392329	66.1024	2.04121	0.0574426	132.626	2.69684	0.135348	292.766	5.46306	0.145068	60.173	1.09894	0.0439012	12050.3	138.221	0.150314	58.4269	26.5809	37.4134
506 - 10.d	30	BelowLOD	451.547	1054.76	8.65675	2.54497	3.68974	461591	8563.45	0.944458	BelowLOD	0.0263988	0.0493357	11.2175	0.541324	0.0282964	BelowLOD	0.0793118	inf	5.142	1.36946	0.863003	4.34437	0.981439	0.631278	0.455174	0.132368	0.123562	19.5221	1.56967	0.184616	88.9788	3.87968	0.144814	149.001	5.08683	0.120533	311.946	9.85528	0.242641	62.7664	2.14993	0.0311774	10548	83.2897	0.163012	BelowLOD	22.5416	43.3958
506 - 11.d	30	BelowLOD	398.576	1060.43	201.284	55.4207	5.05344	459721	9337.26	0.221156	1.08645	0.316959	0.0859987	18.7726	1.64146	0.0106883	BelowLOD	0.59055	inf	32.2728	4.11245	1.99286	20.5181	2.22909	0.357834	2.76059	0.38089	0.100163	58.6849	2.44755	0.331697	208.566	4.81283	0.0897061	301.736	4.97467	0.167582	540.458	8.94073	0.073204	100.418	2.08146	0.00743044	9261.59	131.087	0.0547958	78.8256	31.9702	64.0054
506 - 12.d	30	BelowLOD	332.069	1008.87	12.6721	2.59741	4.72626	463107	6864.31	0.282789	0.468816	0.200399	0.0536619	11.1762	0.932813	0.0423309	BelowLOD	0.2696	inf	10.266	2.24138	0.769408	8.09158	1.13842	0.225888	1.12656	0.26287	0.113131	26.9288	1.44353	0.352204	110.203	3.57484	0.21049	185.244	5.39719	0.0695422	362.174	10.6553	0.0673264	72.3876	2.11113	0.0551471	8961.71	120.611	0.148001	BelowLOD	25.4866	55.7568
506 - 13.d	30	BelowLOD	337.115	1156.16	11.7435	2.64059	4.37391	464028	7098.29	0.47745	0.0936712	0.047689	0.0413018	7.04482	0.448865	0.0800316	BelowLOD	0.147234	inf	11.1244	1.74267	0.328513	11.0244	1.32758	0.653846	0.337596	0.126979	0.253543	38.3126	2.29127	0.0863834	167.792	4.85088	0.212443	270.357	6.05987	0.0681664	493.692	10.4221	0.202314	94.9292	1.69023	0.0568005	9771.99	88.532	0.145067	44.3385	23.2953	42.4278
506 - 14.d	30	BelowLOD	405.115	908.974	BelowLOD	2.15118	3.35849	448051	7940.57	0.543407	0.13672	0.064074	0.0447232	12.8628	0.449046	0.0480263	BelowLOD	0.113575	inf	2.78973	0.987252	0.677043	4.3847	0.85344	0.583237	0.223346	0.108054	0.0170375	15.1335	1.27506	0.456761	82.9616	2.3469	0.0943148	153.349	2.41865	0.0777163	329.591	4.65011	0.152847	66.209	1.17899	0.0194321	12771.1	90.7961	0.277347	BelowLOD	20.3285	39.3176
506 - 15.d	30	BelowLOD	437.828	857.31	9.52496	2.85175	3.92385	453199	7842.59	0.373102	BelowLOD	0.011918	0.0513007	11.756	0.531418	0.0709114	BelowLOD	0.172287	inf	15.6667	2.39471	0.588595	12.1717	1.14257	0.372892	2.06236	0.280401	0.0732444	44.1015	2.28644	0.29906	163.841	3.76389	0.245488	253.188	3.49266	0.134747	468.453	6.05935	0.176921	90.3061	1.44935	0.0544407	9957.72	64.4421	0.091316	BelowLOD	19.624	52.1167
506 - 16.d	30	BelowLOD	367.563	956.626	10.4946	2.47768	5.11523	454314	7059.75	0.618372	0.0709366	0.0598572	0.0163599	14.7809	0.557976	0.0280784	BelowLOD	0.130027	inf	4.87293	1.1208	0.916317	4.0115	0.861705	0.372342	0.688912	0.186441	0.0371516	16.3334	1.34052	0.23677	79.3805	2.43706	0.209975	146.609	3.17333	0.0937691	302.559	7.07431	0.141703	61.0251	1.3302	0.0574715	9691.74	85.6825	0.105967	BelowLOD	20.205	39.0528
506 - 17.d	18.8868	BelowLOD	489.906	1048.61	20.6727	11.9962	4.09972	481882	10148.6	0.67724	0.562296	0.35577	0.0585842	13.425	1.86087	0.0282344	BelowLOD	0.696257	inf	12.8616	3.82729	0.863485	9.24846	1.62049	0.579861	1.10405	0.280234	0.0524018	29.1806	1.978	0.164964	121.012	3.43175	0.165488	208.573	4.02788	0.161014	420.944	7.00582	0.217419	84.2564	1.55528	0.0541875	10670.9	209.355	0.201577	45.9198	23.0051	38.5223
506 - 18.d	30	BelowLOD	379.482	771.035	6.79709	2.73772	3.9095	455284	9333.81	0.536073	BelowLOD	0.0199198	0.0664635	10.9222	0.661874	0.064908	BelowLOD	0.0725387	inf	3.43598	1.0146	0.55211	4.04045	0.802536	0.289317	0.53169	0.143993	0.0380269	16.8397	1.34449	0.348232	85.3179	2.54163	0.113839	155.379	2.44975	0.193137	327.85	4.91168	0.156146	67.2787	1.37843	0.0581858	10882.7	145.538	0.124686	BelowLOD	18.9021	43.8339
506 - 19.d	30	BelowLOD	290.742	752.399	15.4932	2.96522	3.33034	450849	6973.98	0.760967	BelowLOD	0.0102869	0.0556163	5.84955	0.349439	0.0536931	BelowLOD	0.103488	inf	6.11896	1.37562	0.809881	7.20085	1.10247	0.14732	0.852806	0.166475	0.086698	22.975	1.88144	0.262679	91.1257	4.25152	0.209172	159.99	6.05172	0.0688287	323.472	11.7382	0.0667018	64.5848	2.2797	0.0203415	8962.2	108.671	0.182926	BelowLOD	19.2322	42.1045
506 - 20.d	30	BelowLOD	329.087	954.848	7.36689	2.60362	4.17698	457876	7597.74	0.549294	BelowLOD	0.000937803	0.0513587	11.418	0.560394	0.0195138	BelowLOD	0.141572	inf	4.00919	0.905579	0.642565	5.99918	0.909101	0.273162	0.983964	0.160532	0.0939466	23.134	1.53221	0.201194	98.4437	2.56501	0.152168	183.62	3.64991	0.18474	391.557	5.94657	0.203248	81.4202	1.4222	0.0325898	9171.44	119.64	0.191263	BelowLOD	19.4391	47.0752
506 - 21.d	30	BelowLOD	385.21	673.471	6.68933	2.2794	3.727	459434	7372.24	0.649484	BelowLOD	0.0162917	0.0526645	9.79071	0.710346	0.05225	BelowLOD	0.0340444	inf	1.33312	0.611042	0.467716	1.7444	0.525573	0.417568	0.286869	0.128431	0.0656606	11.0326	1.03136	0.263584	46.3834	2.19565	0.125936	91.0449	2.79094	0.110836	211.37	5.97754	0.0650405	43.8661	1.59874	0.0313905	9674.49	176.308	0.191209	BelowLOD	14.3548	30.4005
506 - 22.d	30	BelowLOD	393.114	959.288	8.69655	2.54273	3.74176	459154	5856.38	0.423564	0.0811734	0.0462605	0.048421	5.41053	0.353621	0.0616299	BelowLOD	0.191322	inf	2.10592	0.674504	0.789063	3.15116	0.696093	0.197021	0.657505	0.151777	0.10419	12.1873	1.01174	0.359294	47.0593	2.00255	0.195767	81.5532	2.79582	0.196946	165.667	6.12238	0.224017	34.3561	1.30988	0.041097	9352.81	150.053	0.0669989	BelowLOD	15.3737	28.3897
506 - 23.d	30	BelowLOD	351	936.711	5.18118	2.28838	3.4478	451181	7433.5	0.657761	BelowLOD	0.0138097	0.0566927	11.8356	0.477901	0.0477458	BelowLOD	0.200195	inf	3.99954	1.02255	0.219772	5.73896	1.05095	0.270329	0.768909	0.186043	0.0977353	22.0633	1.67787	0.467131	88.0176	2.56433	0.0775903	152.782	2.96922	0.135052	306.476	5.64663	0.152591	61.4585	1.08885	0.0138364	10005.6	94.0743	0.198648	36.8842	12.6378	29.304
506 - 24.d	30	BelowLOD	320.06	702.703	5.36171	1.94445	4.08394	460945	7279.31	0.748088	BelowLOD	0.000996557	0.0480754	13.4502	0.5952	0.0711942	BelowLOD	0.337359	inf	5.71491	1.2424	0.60334	8.60446	1.14967	0.0654801	1.46684	0.307729	0.0979137	31.8591	2.01515	0.228547	119.543	3.40113	0.214093	202.069	4.8322	0.0387142	417.88	8.89097	0.19473	83.8573	1.58713	0.0406263	9845.81	82.2342	0.15073	BelowLOD	12.4037	31.5072
506 - 25.d	16.4489	BelowLOD	518.763	850.515	111.735	30.47	4.09134	480117	8249.26	0.911488	1.71733	0.47504	0.0719366	14.7755	2.08317	0.0605847	BelowLOD	1.77544	inf	12.6437	3.69715	0.478205	6.29481	2.04984	0.446535	0.396907	0.146576	0.131841	16.8786	2.4559	0.441007	67.263	5.479	0.149919	111.897	5.31716	0.0964789	242.391	13.9617	0.227348	50.2356	2.75844	0.0155583	9796.76	131.876	0.195621	101.148	35.8728	34.522
506 - 26.d	30	BelowLOD	348.597	878.049	5.92209	2.06543	3.56862	457016	9214.08	0.324725	0.445913	0.141562	0.0485709	18.2583	1.48769	0.00952133	BelowLOD	0.731428	inf	8.71508	1.69776	0.869772	9.96617	1.42543	0.327706	1.28977	0.251053	0.0949785	33.6573	2.94963	0.179446	143.182	10.6733	0.210404	247.554	14.5973	0.127142	508.257	24.5654	0.168325	100.108	4.58138	0.0316273	10411.2	126.693	0.12551	36.4888	15.528	29.4354
506 - 27.d	30	BelowLOD	484.577	891.584	11.112	2.5314	3.95622	460121	8343.57	0.682874	1.27557	0.432153	0.080861	11.6256	1.76682	0.0441735	BelowLOD	1.28338	inf	8.46304	1.6316	0.633639	10.2271	1.3212	0.321697	1.20245	0.200115	0.0651632	36.7311	1.70894	0.0422565	129.717	6.57233	0.194339	214.094	10.7262	0.14269	404.988	20.054	0.178437	80.0215	4.2361	0.0138871	9605.09	168.575	0.091794	BelowLOD	13.7418	28.941
506 - 28.d	30	BelowLOD	409.867	990.188	14.7414	2.9818	3.7634	468299	7497.29	0.697517	BelowLOD	0.00978503	0.0172165	4.40684	0.335772	0.0628199	BelowLOD	0.708453	inf	6.88713	1.08059	0.209362	7.49347	1.13823	0.38696	1.24428	0.239396	0.215044	27.5957	1.40247	0.188233	103.755	3.25146	0.182193	173.366	3.18288	0.202838	346.856	6.09258	0.131266	70.0714	1.21777	0.0366212	8261.42	87.3399	0.149942	36.56	13.7415	32.9388
506 - 29.d	30	BelowLOD	397.4	787.899	8.025	2.14217	3.60107	463040	8015.63	0.588506	0.100173	0.0550047	0.023094	17.4005	1.26087	0.0757613	BelowLOD	0.887466	inf	2.73363	0.732219	0.283105	4.20193	0.824881	0.331221	0.870237	0.215942	0.0935437	19.6654	1.70678	0.295347	76.6618	2.96226	0.134936	128.048	3.68649	0.066326	269.031	6.33183	0.269814	53.5007	0.969634	0.0513781	9575.4	121.083	0.147074	BelowLOD	13.9994	25.7013
506 - 30.d	30	BelowLOD	403.929	870.961	9.38023	2.14108	3.54768	466866	8557.01	0.64343	BelowLOD	0.000241387	0.0724637	2.79772	0.244158	0.0505012	BelowLOD	1.02295	0.431583	1.64374	0.596241	0.73789	1.99413	0.500164	0.296342	0.167266	0.0907558	0.117088	11.3964	1.15703	0.353104	51.6851	1.99373	0.0769348	99.2093	2.49051	0.134001	203.39	5.11853	0.126192	42.5596	1.0159	0.019171	9270.07	191.749	0.144084	28.478	15.8553	24.7494
508
508 - 1.d	30	BelowLOD	450.407	998.641	10.7424	2.83854	3.5804	463403	7881.21	0.638412	1.634	0.642779	0.0324685	22.8131	2.21961	0.0738848	401.19	179.866	0.565744	13.015	3.8537	0.589967	7.56587	1.36547	0.252488	1.21192	0.235661	0.11956	29.2667	2.25988	0.220222	114.173	2.58176	0.191188	202.507	4.10182	0.14426	420.326	8.11868	0.125703	86.2496	1.55598	0.0328051	8991.97	86.2191	0.132989	BelowLOD	11.8851	25.0732
508 - 2.d	30	BelowLOD	422.535	927.492	6.79158	1.96367	3.15571	462648	8529.97	0.523073	0.995849	0.446276	0.0656168	19.4992	2.39532	0.0690626	20.6039	7.44632	0.512131	7.87885	2.04582	0.261277	5.31617	0.801328	0.50285	0.633452	0.161921	0.0900019	19.4397	1.28599	0.528696	83.0522	2.56913	0.10785	156.265	2.8744	0.110587	342.987	5.51445	0.0864292	70.5103	1.21755	0.0394669	9977.68	91.6291	0.141151	BelowLOD	9.5722	17.2406
508 - 3.d	30	BelowLOD	318.745	840.894	9.99272	2.05003	2.42706	465003	9251.41	0.27112	BelowLOD	0.0304543	0.0369425	15.842	0.78364	0.0200761	1.06507	0.66689	0.424543	2.33315	0.631384	0.604372	4.65203	0.899902	0.265075	0.753197	0.182259	0.143324	20.1321	1.51689	0.339262	80.8763	2.82591	0.157038	145.679	3.92992	0.196584	304.133	6.69817	0.224717	62.5635	1.24032	0.0310061	9833.29	105.83	0.0670512	BelowLOD	8.54953	24.8149
508 - 4.d	20.6348	BelowLOD	467.802	877.295	8.39303	2.73052	3.52923	492055	9352.34	0.0980228	1.60345	0.378658	0.0596054	14.0586	1.23523	0.0528607	13.3504	2.5067	0.247483	14.4358	2.80396	0.529611	10.1116	1.55167	0.462538	1.54226	0.353252	0.0401059	34.6483	2.62011	0.274595	119.424	4.6177	0.176778	193.513	8.34777	0.13158	377.475	13.3274	0.19434	72.7878	2.49485	0.014369	9050.67	120.562	0.118275	30.8051	13.7442	20.1506
508 - 5.d	30	BelowLOD	504.263	1189.48	12.987	3.67333	4.10633	460937	11560.3	0.677376	2.98	0.650789	0.0453783	26.6945	2.52031	0.0586409	16.3842	3.43075	0.418496	21.552	3.59414	0.549794	15.0036	2.23333	0.622278	2.41766	0.3984	0.144073	43.9507	2.92751	0.512164	147.565	5.31822	0.250702	244.143	6.26508	0.103521	474.308	11.756	0.362202	91.4982	2.34242	0.0409028	8343.07	90.5151	0.151993	42.7066	16.2324	33.737
508 - 6.d	30	BelowLOD	289.919	780.862	4.02449	2.27892	2.87827	463849	8527.97	0.400503	1.03017	0.395165	0.0631277	11.7825	1.81786	0.0771529	4.39191	1.96162	0.257263	6.05918	3.04427	0.662126	4.08268	1.75831	0.594077	0.379621	0.134188	0.0398511	9.18085	1.95264	0.0458971	39.6231	6.92397	0.210513	83.5242	12.914	0.11191	187.012	24.5874	0.201638	42.2657	5.38987	0.0142797	10716.4	232.115	0.175369	BelowLOD	10.9619	28.6753
508 - 7.d	30	BelowLOD	355.576	880.996	7.67033	2.11076	3.49651	468397	8669.32	0.467437	0.181812	0.0983037	0.036976	4.43187	0.360354	0.0464499	0.533661	0.252483	0.194615	2.64041	0.811691	0.469175	3.50296	0.77309	0.0775293	0.280675	0.103986	0.037433	16.0936	1.08793	0.40158	57.5618	2.0032	0.222569	101.56	1.93209	0.112188	200.95	3.05813	0.233788	40.9665	0.948771	0.0188933	9392.33	94.4942	0.092687	29.6891	10.8503	21.4839
508 - 8.d	30	BelowLOD	369.607	977.911	5.6384	1.99791	2.70606	466402	7682.06	0.72373	0.102726	0.0498631	0.0383636	12.3961	0.572074	0.0741227	0.381573	0.20383	0.251203	5.25291	0.929572	0.242843	7.75281	1.20331	0.244614	1.76708	0.341161	0.10578	30.7563	2.34783	0.291324	106.853	5.03941	0.0567055	180.556	6.29156	0.161639	351.517	8.86169	0.167215	70.939	2.20062	0.0647477	8564.58	135.453	0.145243	BelowLOD	8.86353	22.9727
508 - 9.d	30	BelowLOD	412.627	909.023	BelowLOD	1.54194	3.67885	473454	8462.15	0.850114	0.172866	0.0958707	0.0852218	12.0988	0.678118	0.0232761	0.528902	0.333693	0.138042	2.43808	1.05243	0.439996	2.99004	0.95288	0.659876	0.275385	0.137632	0.18566	12.3383	1.43078	0.200959	52.4039	2.05314	0.200345	109.188	3.53393	0.117227	259.946	7.47539	0.309185	55.1782	1.66647	0.0597246	10574.4	144.688	0.177488	BelowLOD	12.2152	23.2473
508 - 10.d	30	BelowLOD	347.721	939.629	9.95936	2.43784	2.91265	466500	8960.84	0.826188	0.101742	0.0613387	0.060147	13.5939	0.705762	0.0950877	0.940148	0.240889	0.168377	5.07865	0.899924	0.50139	7.62898	1.0107	0.513738	1.05797	0.185494	0.113945	34.1256	2.02806	0.317318	111.713	2.98639	0.197558	185.659	4.04453	0.107369	368.359	7.24488	0.213966	72.8545	1.22965	0.00654948	9684.55	124.516	0.148238	BelowLOD	8.05907	19.2141
508 - 11.d	30	BelowLOD	334.363	1045.43	4.42297	1.46068	3.45258	464324	8457.36	0.286113	0.524216	0.134622	0.0350436	17.1801	0.588982	0.0699517	3.39302	0.485531	0.120115	21.8102	2.09155	0.45679	27.2764	1.82112	0.323435	0.55386	0.148374	0.111668	101.003	3.78011	0.295091	269.66	5.1614	0.144775	385.654	6.41911	0.094807	651.381	9.82199	0.199062	122.824	1.94988	0.0441127	8780.05	120.736	0.205165	BelowLOD	11.8694	15.8955
508 - 12.d	30	BelowLOD	313.4	926.015	10.8149	1.83899	3.07019	465957	8868.63	0.784147	BelowLOD	0.00739318	0.0277263	3.41422	0.308248	0.0449404	0.200628	0.131119	0.0737535	1.84892	0.554531	0.816133	4.02489	0.806101	0.444688	0.586823	0.170074	0.0424277	18.7679	1.81407	0.16607	57.8497	3.47297	0.193851	95.818	3.90604	0.0884919	182.647	6.30368	0.333757	36.1899	1.15287	0.0482528	8589.05	118.261	0.158564	BelowLOD	13.7226	29.1417
508 - 13.d	30	1249.37	541.699	923.459	3.49687	1.34705	2.23981	466321	8583.02	0.509812	5.12418	1.54003	0.0715293	27.292	3.98361	0.0933734	9.40976	2.52952	0.181603	22.4148	6.10133	0.368029	5.84657	1.26041	0.33611	0.433538	0.158362	0.086255	14.2467	1.57474	0.219831	50.7131	1.79848	0.258038	99.0395	2.14033	0.142208	240.734	5.40766	0.161112	50.5328	0.998786	0.0145054	11028.2	94.2854	0.119459	BelowLOD	10.5366	24.2465
508 - 14.d	30	BelowLOD	302.973	904.942	11.3699	1.97139	2.61412	462512	7166.76	0.29104	BelowLOD	0.0152788	0.0427733	3.4465	0.268297	0.0283231	0.227554	0.150549	0.0847157	2.83102	0.823952	0.563191	5.37088	0.988555	0.358547	0.36963	0.124575	0.0841114	21.7501	1.7742	0.317374	70.5851	3.15114	0.174941	113.446	3.82829	0.111639	221.535	8.71806	0.299112	42.2281	1.95844	0.0435402	9950.53	83.8555	0.107906	BelowLOD	10.8133	25.4319
508 - 15.d	30	BelowLOD	423.555	1049.13	8.53777	1.72372	2.3957	473081	7962.3	0.972878	1.1027	0.238194	0.0565488	18.2713	1.15722	0.0430943	3.48136	0.848573	0.482774	7.7832	1.77535	0.729559	5.17314	1.12911	0.338483	0.52779	0.179277	0.0965782	18.3122	1.71035	0.353494	61.9831	2.33159	0.178315	113.586	2.40063	0.254824	244.672	5.23681	0.289197	48.7802	1.00661	0.0796448	9975.93	103.299	0.103622	BelowLOD	10.9041	21.976
508 - 16.d	30	BelowLOD	380.299	833.986	9.40588	1.80447	2.02636	460290	8020.87	0.683896	0.357456	0.149891	0.0749876	10.9135	0.581988	0.0458892	1.55563	0.435149	0.304465	6.79152	1.35026	0.227539	9.94085	1.50379	0.55722	1.82103	0.279461	0.168537	41.463	2.22606	0.34949	133.205	3.19406	0.234219	216.262	3.9383	0.0408634	418.888	7.57107	0.253457	81.7272	1.75155	0.0321851	8043.96	83.7447	0.110378	BelowLOD	11.5049	29.9386
508 - 17.d	30	BelowLOD	377.104	866.3	8.54643	1.52931	2.63416	466504	7982.4	0.511992	0.1282	0.0585678	0.043762	8.39263	0.56071	0.059988	0.899687	0.342087	0.367668	5.41797	1.192	0.523646	6.19819	0.972303	0.309348	0.652499	0.177361	0.0639249	26.4873	1.75583	0.153895	96.7103	2.7696	0.222136	169.687	3.01239	0.0403028	330.78	6.78667	0.203279	66.8732	1.15937	0.0564297	9439.03	84.0782	0.144334	BelowLOD	13.1352	19.5369
508 - 18.d	25.8786	BelowLOD	485.871	1054.09	13.7399	4.57711	3.02417	475137	9651.56	0.341428	2.7603	0.786668	0.0208751	24.4355	3.30207	0.0465426	13.3193	3.88008	0.633669	22.472	5.61669	0.399684	14.3263	3.64027	0.634888	0.514999	0.179783	0.08577	29.1481	3.31516	0.451049	89.4053	5.189	0.183468	144.139	5.82512	0.128433	292.35	13.3532	0.0756057	56.7284	2.54328	0.0599266	11677.4	115.684	0.322655	49.2722	15.7109	37.4645
508 - 19.d	30	1313.99	659.432	795.673	3.51952	1.35174	2.13433	471432	7558.28	0.210466	3.33132	1.27538	0.0627096	29.3673	4.9482	0.0283228	9.25024	2.98371	0.747959	15.2785	4.98071	0.54425	6.65431	1.44223	0.413223	0.401163	0.128385	0.0519638	20.82	2.11248	0.109981	70.2734	2.49027	0.186796	141.183	3.39675	0.122689	316.01	8.70816	0.268595	66.056	1.31596	0.0315109	11129	95.2853	0.125161	BelowLOD	14.9186	27.1182
508 - 20.d	30	BelowLOD	373.254	748.371	4.04993	1.38294	2.31417	466066	7468.44	0.589856	BelowLOD	0.0142052	0.0503824	22.0349	0.743764	0.0552101	BelowLOD	0.247373	inf	2.73577	0.883708	0.155778	4.31447	0.743613	0.322827	0.651559	0.165218	0.140213	24.7708	2.19056	0.154981	102.026	2.65402	0.176195	191.034	2.65243	0.181554	422.444	6.21392	0.185145	84.6268	1.5541	0.0366882	10117	94.8606	0.117795	BelowLOD	14.6527	24.8883
508 - 21.d	30	BelowLOD	320.066	977.378	7.059	1.47087	2.56388	457295	8393.57	0.758432	0.0348644	0.0302369	0.00819543	7.26802	0.446693	0.056428	BelowLOD	0.624584	inf	10.9648	1.27976	0.450626	17.2831	1.80064	0.0658618	2.0246	0.273663	0.0367076	75.4003	3.03219	0.264709	201.142	4.60336	0.14622	310.875	5.62202	0.122332	552.724	9.16105	0.0304973	103.402	1.8149	0.0283582	8768.71	112.908	0.191537	BelowLOD	13.4623	28.1066
508 - 22.d	30	BelowLOD	379.171	896.519	3.6201	1.41282	2.49487	471779	7610.45	0.655393	1.75934	0.23724	0.0682528	14.1854	0.804082	0.0463221	BelowLOD	1.52904	inf	12.7556	1.69192	0.157871	6.92263	1.13496	0.288455	0.320443	0.117916	0.194216	11.8682	1.3642	0.293766	36.6186	1.72936	0.222652	63.5462	2.09832	0.173323	153.805	4.23946	0.163482	31.8667	0.895071	0.0539621	10444.6	71.6837	0.14803	BelowLOD	15.4104	33.4382
508 - 23.d	30	BelowLOD	519.179	958.879	8.53622	2.62373	2.6911	464369	8973.27	0.806795	3.60922	1.16662	0.0384412	30.0947	4.90867	0.0657559	BelowLOD	6.25229	inf	21.6022	5.76588	0.356477	9.63836	1.87593	0.145381	0.416062	0.151474	0.113559	23.8711	2.15115	0.23557	74.1973	3.03739	0.286869	138.031	3.22309	0.0424541	300.465	6.00672	0.229518	60.4559	1.14144	0.015078	10097.5	110.42	0.144569	37.1369	18.5229	30.4738
508 - 24.d	30	BelowLOD	368.005	972.458	6.09606	1.38486	2.27751	460269	7434.78	0.771311	BelowLOD	0.0157827	0.0358442	3.91747	0.262399	0.0406434	BelowLOD	0.65062	inf	5.39971	0.958163	0.7141	9.73883	1.41032	0.347157	0.925591	0.17643	0.137422	38.4217	2.78915	0.367478	114.107	4.72105	0.0574466	184.958	6.0656	0.0891302	355.547	9.57276	0.202981	73.7155	1.7185	0.0573178	8483.93	94.5025	0.208733	BelowLOD	14.5854	37.5736
508 - 25.d	30	BelowLOD	368.026	785.237	BelowLOD	1.20112	2.44224	459028	7081.84	0.762812	0.198334	0.102604	0.0364947	16.6725	0.765775	0.0348032	BelowLOD	0.98683	inf	1.55332	0.531757	0.447608	2.17134	0.533149	0.32371	0.489794	0.154578	0.0621584	15.3847	1.42693	0.396021	59.6422	1.92599	0.170936	127.134	2.4652	0.160547	304.06	4.90119	0.251446	64.4844	1.11092	0.00672017	10907.8	97.2033	0.0496449	BelowLOD	17.334	27.7106
508 - 26.d	30	BelowLOD	395.962	1212.04	4.5346	1.42491	2.62712	465071	8665.4	0.482792	0.330926	0.146704	0.066609	18.877	0.813468	0.00949754	BelowLOD	1.08756	inf	2.63635	0.884836	0.509113	2.92592	0.7197	0.223059	0.447858	0.134013	0.137097	18.8319	1.5722	0.250617	76.891	2.56242	0.169981	153.224	3.12369	0.0973575	356.476	5.71623	0.195985	71.9248	1.32736	0.014391	11045.2	89.4604	0.151313	46.8692	20.7144	38.2806
508 - 27.d	30	BelowLOD	330.639	1015.7	7.46967	1.707	2.46925	461774	8821.5	0.796603	BelowLOD	0.00780405	0.032068	12.0734	0.552816	0.0292958	BelowLOD	0.769268	inf	0.897846	0.446793	0.339512	3.10881	0.751944	0.391169	0.617909	0.168335	0.0627596	15.6124	1.24191	0.35615	61.2798	2.01383	0.181845	116.95	2.5452	0.0831268	255.044	5.07054	0.131958	52.6812	1.21624	0.0378455	9716.59	111.753	0.0506052	BelowLOD	21.2929	38.3437
508 - 28.d	30	BelowLOD	371.144	1018.72	BelowLOD	1.0404	2.92156	469680	8168.41	0.530239	0.0492318	0.0368403	0.0363124	8.48242	1.49614	0.0604461	BelowLOD	1.04177	inf	1.31653	0.48946	0.252873	2.9923	0.847943	0.360379	BelowLOD	0.0565201	0.167045	14.9233	3.07285	0.398702	55.7401	6.38978	0.116543	104.683	10.1731	0.040828	216.471	13.7853	0.161381	41.6022	1.64179	0.0289775	13265.7	290.249	0.0694685	43.6198	22.8851	38.9914
508 - 29.d	30	BelowLOD	317.229	1056.23	5.11008	1.50294	2.18598	464166	7625.71	0.103797	BelowLOD	0.000528959	0.0584075	11.9172	0.534602	0.0717275	BelowLOD	0.799526	inf	1.00621	0.430668	0.48698	2.52152	0.706104	0.402087	0.183609	0.0899405	0.158516	13.3343	1.30121	0.408902	50.859	1.57564	0.180215	98.7673	1.87936	0.117664	218.884	3.73035	0.212358	43.3894	0.79116	0.0475032	10268.7	126.962	0.0237903	BelowLOD	19.908	48.8709
508 - 30.d	30	BelowLOD	345.999	745.99	7.2099	1.70636	2.68101	465873	8044.27	0.646064	BelowLOD	0.0300178	0.0596194	15.8418	1.06732	0.0759526	BelowLOD	5.42315	inf	8.99019	0.990456	0.436231	12.4969	1.79148	0.428125	1.84418	0.295692	0.122374	61.7703	4.3103	0.390506	175.4	10.4575	0.12995	289.308	15.5466	0.116782	525.714	28.4783	0.198748	100.242	5.49794	0.0203838	9280.29	116.724	0.139858	BelowLOD	22.9039	49.4108
COG1
COG1 - 1.d	30	BelowLOD	365.391	670.735	8.46989	1.70167	2.59153	484881	10800.6	0.797791	BelowLOD	0.0103642	0.0728147	12.9215	0.587784	0.0899622	0.105917	0.0566543	0.028378	1.27637	0.424211	0.21326	2.00228	0.571675	0.476566	0.521427	0.13668	0.0783702	10.8706	1.04622	0.222339	44.9038	1.74667	0.201019	87.9821	2.70876	0.12512	213.045	5.51887	0.234571	45.0984	1.34735	0.0557704	8413	114.078	0.162837	BelowLOD	85.3967	inf
COG1 - 2.d	30	BelowLOD	505.119	877.978	5.11697	1.47226	3.09053	477156	10339.1	0.803418	BelowLOD	0.00377536	0.0681156	13.7576	0.678299	0.110352	0.0904581	0.0469818	0.0360121	1.54661	0.523948	0.309427	2.05055	0.763773	0.293605	0.725781	0.194267	0.171259	9.26092	1.38372	0.343678	40.3292	2.75958	0.419002	89.3276	4.1001	0.0694405	248.947	8.03258	0.255351	55.9669	1.31865	0.0693675	8928.68	121.808	0.0619855	BelowLOD	127.098	inf
COG1 - 3.d	30	BelowLOD	277.341	881.336	5.72502	1.48738	2.52666	472105	8236.66	0.489735	BelowLOD	0.00976501	0.0480962	11.6608	0.748303	0.0614161	0.0937648	0.0494367	0.00551231	2.25886	0.515385	0.351912	3.70164	0.727099	0.377463	0.911508	0.209462	0.0768129	19.4347	2.18899	0.319612	67.9354	5.81383	0.126785	118.565	8.58344	0.130847	253.954	14.6845	0.211705	51.7251	2.51442	0.0588685	8722.72	158.583	0.144427	BelowLOD	84.9632	inf
COG1 - 4.d	30	BelowLOD	307.681	1112.2	3.01393	1.27303	2.10816	469462	7875.51	0.497393	BelowLOD	0.0017779	0.0367375	10.5589	0.630389	0.0440517	0.0449142	0.0261365	0.0110498	BelowLOD	0.232973	0.458078	1.60363	0.599573	0.303678	0.614202	0.179411	0.0616308	6.32902	0.95584	0.201124	29.1735	2.71025	0.186484	66.15	4.34521	0.0824318	214.283	9.84301	0.353217	52.0594	2.01635	0.0513842	9205.47	95.4716	0.118185	BelowLOD	152.194	inf
COG1 - 5.d	30	BelowLOD	328.842	1012.98	5.53148	1.13853	2.7954	475178	7729.22	0.224716	BelowLOD	0.013965	0.0532905	12.7624	0.738964	0.079097	0.122696	0.0433733	0.0341997	1.67998	0.551426	0.490609	4.58886	0.898698	0.434509	1.24912	0.260831	0.0736075	17.525	1.98477	0.100626	67.9155	5.93051	0.177695	124.077	7.80464	0.179219	292.6	14.7811	0.263551	62.7629	2.72684	0.0156645	8516.95	108.55	0.180686	BelowLOD	147.681	inf
COG1 - 6.d	30	BelowLOD	275.782	968.656	6.00099	1.64337	2.30929	479017	8402.35	0.651917	BelowLOD	0.000589482	0.0188327	12.3494	0.609626	0.0475673	BelowLOD	0.0207245	0.0246085	1.07142	0.428051	0.238414	2.38232	0.658009	0.437741	0.757844	0.182548	0.0799413	10.6373	1.21855	0.358579	46.7065	1.97805	0.193953	96.7163	2.54195	0.187388	252.32	5.78043	0.357673	56.7041	1.36586	0.0500042	8331.25	101.04	0.213541	BelowLOD	155.522	inf
COG1 - 7.d	30	BelowLOD	303.308	702.774	6.71798	1.65821	2.38624	469483	7557.93	0.306207	BelowLOD	0.00689046	0.0477014	16.1089	0.714243	0.0767573	0.115054	0.0466586	0.0219972	2.9356	0.650444	0.257568	4.94853	0.891039	0.751741	1.53343	0.276611	0.106595	21.2401	1.56772	0.339481	81.8153	3.74947	0.0615547	148.982	5.33933	0.151853	338.647	11.8528	0.242235	71.6092	2.42592	0.0323101	8069.5	111.997	0.0240136	BelowLOD	235.514	inf
COG1 - 8.d	30	BelowLOD	292.847	856.76	5.17969	1.51967	2.78755	475139	8789.31	0.438244	BelowLOD	0.00101022	0.0385721	10.0096	0.374376	0.0445259	BelowLOD	0.0173928	0.0220319	0.931413	0.349746	0.458131	1.53619	0.55799	0.367759	0.365314	0.135097	0.0380267	7.65748	0.957	0.451695	31.7992	1.62089	0.153444	61.7268	2.18324	0.183694	166.803	3.88558	0.236782	37.0106	1.1267	0.0220151	8799.64	93.8976	0.107357	BelowLOD	320.572	inf
COG1 - 9.d	30	BelowLOD	320.392	903.98	6.18521	1.52819	2.37164	479334	6746.05	0.800544	0.0516598	0.0340819	0.0370468	15.7976	0.641048	0.0641779	0.192484	0.0594174	0.0274309	5.19334	0.743783	0.176964	8.42264	1.14083	0.365989	1.99909	0.304775	0.0721021	31.8846	1.8397	0.278617	116.171	3.42592	0.120045	188.155	3.69845	0.0403213	366.792	7.84562	0.248638	74.9302	1.56353	0.0401179	8298.29	105.63	0.194527	BelowLOD	482.948	inf
COG1 - 10.d	30	BelowLOD	331.216	734.509	4.94994	1.38422	2.95748	475129	8337.17	0.216676	BelowLOD	0.00889979	0.0407612	13.48	0.56498	0.0613773	0.0628686	0.0357769	0.00821443	2.18734	0.509086	0.373908	2.95611	0.730942	0.153576	1.32041	0.258069	0.0725589	13.4427	1.46147	0.289739	57.475	3.54589	0.0598297	112.152	4.47148	0.123149	268.635	7.37082	0.149453	57.5167	1.38557	0.0206206	8599.67	115.561	0.180067	BelowLOD	3579.76	inf
COG1 - 11.d	30	BelowLOD	322.808	656.714	2.75221	1.34221	2.15619	471724	9568.85	0.544051	BelowLOD	0.0126469	0.0686855	9.86694	0.557314	0.0772255	0.0658767	0.0343194	0.0306759	1.25415	0.411932	0.305847	1.45843	0.513264	0.2185	1.01744	0.21321	0.0389241	7.22281	1.18727	0.214539	33.8688	3.33437	0.246062	67.8907	5.12647	0.0822318	190.962	7.61225	0.3691	43.8922	1.12091	0.0335299	9343	101.732	0.174053	BelowLOD	146.214	326.073
COG1 - 12.d	30	BelowLOD	322.459	824.994	3.92442	1.26743	1.95552	477755	7573.27	0.38645	BelowLOD	0.000642575	0.0570655	12.8879	0.542591	0.0100174	0.0767893	0.0476326	0.00914468	1.24943	0.384298	0.258992	2.69896	0.658997	0.482557	1.14904	0.243379	0.115343	13.4038	1.41105	0.270618	51.3427	2.25914	0.0856965	103.036	3.81845	0.120681	272.157	6.44023	0.0690546	59.1719	1.68198	0.042989	8894.93	77.81	0.271413	BelowLOD	106.173	270.537
COG1 - 13.d	22.7967	BelowLOD	342.927	716.193	7.78498	1.86989	2.59519	477928	9014.9	0.518236	BelowLOD	0.0134671	0.00923779	12.609	0.587827	0.0221819	BelowLOD	0.0165924	0.0434512	1.03664	0.424697	0.266516	1.84759	0.603205	0.247775	0.665089	0.203227	0.0976199	7.98668	1.14844	0.304751	34.9961	2.01655	0.231259	76.5404	1.87305	0.0589543	210.955	5.55875	0.163269	46.5728	0.982938	0.0331004	8687.57	137.757	0.340933	BelowLOD	106.28	351.655
COG1 - 14.d	30	BelowLOD	292.351	864.674	4.3382	1.33009	2.35171	478865	9388.46	0.226676	BelowLOD	0.0189122	0.0590974	12.8445	0.523682	0.0934963	0.125866	0.0531784	0.0260056	2.7168	0.642239	0.216737	6.1761	1.0283	0.241481	1.37269	0.254699	0.143081	16.6729	1.07141	0.0968569	58.8158	1.82226	0.188017	111.122	2.33536	0.0410759	274.798	5.26945	0.0965182	61.1433	0.970986	0.015144	9063.98	88.0157	0.143964	BelowLOD	101.758	224.174
COG1 - 15.d	21.9687	BelowLOD	322.835	683.297	5.26123	1.82595	2.22563	480742	9772.49	0.460941	BelowLOD	0.0127484	0.0644052	11.0083	0.510632	0.0608518	0.0510731	0.0508238	0.00504282	0.762289	0.310413	0.391156	1.49358	0.500038	0.109716	0.319433	0.133659	0.128614	8.7031	1.05341	0.276544	34.4915	1.69871	0.253655	76.6371	2.37197	0.0825388	197.459	3.42591	0.15371	43.2209	1.14682	0.0558575	8518.37	181.421	0.255026	BelowLOD	85.5699	174.57
COG1 - 16.d	30	BelowLOD	292.339	882.9	3.8731	1.24733	2.20276	475080	8834.82	0.846154	BelowLOD	0.000996434	0.0533899	11.5399	0.510777	0.0726466	0.128532	0.0524149	0.0196688	1.15303	0.42228	0.343124	3.21399	0.730723	0.366645	0.835682	0.196336	0.0186498	12.0216	1.45935	0.134085	48.2597	2.78445	0.234348	94.0605	4.41148	0.0813038	230.346	7.73375	0.115616	50.9731	1.56748	0.0523185	8934.58	87.4591	0.177851	BelowLOD	62.1905	178.384
COG1 - 17.d	30	BelowLOD	314.43	866.363	6.91796	1.43313	2.28297	466026	9479.67	5.37228	BelowLOD	0.000515567	0.0420839	15.8324	0.688621	0.0433269	0.12039	0.0593344	0.0420213	2.00699	0.492247	0.320191	3.42793	0.667297	0.402116	1.29923	0.26988	0.14959	16.0664	1.70338	0.193343	67.2223	2.77129	0.206812	132.356	3.35757	0.069252	304.508	7.69794	0.240158	62.8617	1.41658	0.0775635	8112.33	118.651	0.150916	BelowLOD	55.835	195.117
COG1 - 18.d	18.4729	BelowLOD	300.814	1041.01	2.74749	1.16686	2.36855	488939	10055.2	0.487943	BelowLOD	0.0225671	0.035121	11.5697	1.00667	0.010403	0.377312	0.184381	0.0327957	2.41806	0.761104	0.334009	3.9993	1.16194	0.227371	1.01222	0.340803	0.191305	14.0389	2.93861	0.306165	54.3208	8.20937	0.193799	103.066	12.5162	0.0591046	269.612	25.7152	0.268111	60.3655	5.12165	0.0527798	10514.9	381.068	0.14388	BelowLOD	81.0625	183.516
COG1 - 19.d	30	BelowLOD	420.62	982.956	4.62633	1.57519	3.12469	471329	10429.4	0.802468	BelowLOD	0.0181367	0.0826655	11.461	0.59755	0.111749	0.143315	0.0936975	0.057324	0.493923	0.370418	0.137229	0.685441	0.347398	0.266931	0.430532	0.202642	0.051712	6.44081	0.93643	0.0561697	25.4548	1.28516	0.183855	62.6159	1.98137	0.122933	185.692	4.60049	0.316239	42.6231	1.04243	0.0920815	10734.9	140.862	0.142354	BelowLOD	83.7964	157.555
COG1 - 20.d	30	BelowLOD	280.976	952.618	4.88645	1.39813	2.35665	482753	8552.64	0.459904	BelowLOD	0.00931296	0.0622738	11.719	0.606659	0.0993679	BelowLOD	0.0504354	0.0191566	1.15356	0.382908	0.524941	1.0325	0.372407	0.405771	0.457489	0.15211	0.126638	6.8693	0.852652	0.230606	26.8265	1.31096	0.217679	58.1275	1.70498	0.0975309	163.995	3.51788	0.0954902	37.887	0.712562	0.0360561	9094.65	145.05	0.156314	BelowLOD	47.4444	108.53
COG1 - 21.d	30	BelowLOD	321.426	842	8.60388	1.77674	2.76095	476459	10100.3	0.663545	BelowLOD	0.0143941	0.0757657	17.3382	0.734985	0.0806523	0.434125	0.162408	0.0321334	1.53995	0.438488	0.260943	3.98987	0.820164	0.244023	1.4106	0.275893	0.098894	17.4302	1.31094	0.411177	72.7976	2.28817	0.184481	149.26	4.03897	0.0856506	333.312	6.43049	0.135339	71.4094	1.71781	0.0545848	7915.12	88.7512	0.19896	BelowLOD	43.3713	130.96
COG1 - 22.d	30	BelowLOD	318.371	983.296	4.63612	1.72137	3.03545	473052	7750.74	0.979874	BelowLOD	0.0119246	0.0608017	13.648	0.566083	0.0841295	0.534452	0.312675	0.0326168	1.05139	0.390638	0.351286	2.83491	0.6474	0.37296	0.889464	0.226925	0.0908448	12.447	1.10976	0.291689	49.009	2.00704	0.0922243	104.376	2.79525	0.181387	264.734	7.61832	0.0741757	58.9645	1.43362	0.047911	8492.78	121.41	0.169756	BelowLOD	41.3219	181.543
COG1 - 23.d	30	BelowLOD	315.871	868.114	6.45215	1.6795	2.18484	473798	9217.03	0.558269	BelowLOD	0.00784863	0.0198023	14.9429	0.539349	0.057293	BelowLOD	22.8408	0.0201342	4.76301	0.814326	0.15946	10.0766	1.10216	0.467411	2.40336	0.363947	0.133028	32.3062	1.94689	0.254458	107.242	2.70397	0.150579	168.673	3.00342	0.153675	338.127	6.29978	0.238381	67.913	1.09795	0.0555417	8132.65	108.434	0.12638	BelowLOD	39.082	140.713
COG1 - 24.d	30	BelowLOD	326.244	926.033	4.91513	1.47484	2.44896	475961	8194.48	0.712418	BelowLOD	0.000111956	0.058494	12.2058	0.62475	0.0548697	BelowLOD	0.148161	0.0718279	1.34863	0.41825	0.242861	2.03821	0.534649	0.224901	0.802693	0.196943	0.100268	7.43498	1.12201	0.397828	35.5046	1.91027	0.132898	75.1196	2.88969	0.102774	217.977	5.86548	0.287146	49.7422	1.13521	0.0454725	9535.13	70.6554	0.111537	BelowLOD	35.5294	124.513
COG1 - 25.d	30	BelowLOD	340.264	560.126	6.31898	1.59377	3.19896	487350	8489.37	0.720261	BelowLOD	0.00157476	0.0686366	11.9379	0.691013	0.0506507	BelowLOD	0.0600571	0.255069	1.02161	0.380465	0.282456	2.66936	0.640813	0.445012	0.894277	0.21629	0.0448141	8.06543	1.01099	0.0471087	39.8916	2.24773	0.0297569	72.3234	2.57062	0.125669	164.599	5.47476	0.144015	35.5482	1.13312	0.0221524	8282.76	141.554	0.19753	BelowLOD	34.1177	134.751
COG1 - 26.d	30	BelowLOD	259.181	836.791	4.26922	1.58001	2.60392	468632	8166.29	0.757553	BelowLOD	0.0134395	0.0567428	14.4843	0.557719	0.0296259	BelowLOD	0.103014	inf	2.04465	0.513567	0.422248	3.04743	0.627982	0.332819	1.32217	0.261217	0.0888089	12.2283	1.1618	0.345297	54.7568	1.82542	0.207028	115.196	2.5686	0.171216	306.233	6.29482	0.171087	68.7978	0.99858	0.0450081	8392.48	116.813	0.177685	BelowLOD	30.6108	88.6917
COG1 - 27.d	30	BelowLOD	338.359	914.891	10.4513	2.42256	3.034	480959	8543.55	0.713841	BelowLOD	0.00227441	0.0397318	10.3418	0.518051	0.0659041	BelowLOD	0.0148898	inf	0.491519	0.30564	0.491487	1.44627	0.505135	0.248156	0.648634	0.163651	0.0627794	8.95875	1.05396	0.278361	39.9012	1.67949	0.138724	83.5517	1.90852	0.15733	203.892	4.74671	0.168805	46.2712	0.958129	0.0343546	8217.5	105.289	0.242016	BelowLOD	38.9868	103.463
COG1 - 28.d	30	BelowLOD	360.193	743.12	5.78269	1.89212	2.82565	478145	9072.75	0.222948	BelowLOD	0.0361661	0.0531686	12.1477	0.527135	0.0794708	BelowLOD	0.0293061	inf	2.05697	0.493709	0.162706	2.82851	0.748181	0.503614	1.22696	0.258593	0.0201524	12.1453	1.46515	0.213054	54.5362	3.1074	0.210789	109.503	3.77285	0.0805502	274.727	8.35858	0.183885	59.6508	1.88698	0.0405838	8229.79	104.059	0.121804	BelowLOD	27.4224	94.3158
COG1 - 29.d	30	BelowLOD	240.911	864.912	6.30333	1.66022	2.49187	475797	7105.65	0.587655	BelowLOD	0.000397239	0.0988037	13.6052	0.555111	0.0639454	BelowLOD	0.0162859	inf	1.35097	0.414059	0.353258	2.07177	0.522887	0.276396	0.906052	0.194222	0.156834	9.89333	0.987539	0.18945	41.8065	1.64788	0.142857	87.9088	2.79488	0.0951787	232.711	4.83374	0.1866	53.5706	1.16521	0.0498472	8964.02	134.409	0.110575	BelowLOD	29.9143	90.3701
COG1 - 30.d	30	BelowLOD	314.082	854.492	9.26301	2.2161	3.68197	468673	9813.63	0.101176	BelowLOD	0.034278	0.0371874	17.4823	0.650695	0.0101599	BelowLOD	0.0301152	inf	4.46497	0.785341	0.285952	6.21763	0.93223	0.451218	1.9254	0.332432	0.180565	26.0105	1.57365	0.348701	97.1075	2.82635	0.170711	173.137	3.21856	0.104366	363.872	6.59733	0.175798	76.8943	1.50514	0.0388189	8183.88	113.722	0.178725	BelowLOD	30.1155	93.1004
CQGN
CQGN - 1.d	30	BelowLOD	297.952	897.166	14.104	3.57286	4.38281	477615	8675.02	0.513235	BelowLOD	0.00688974	0.0404639	21.0689	0.765848	0.0477463	BelowLOD	0.0181289	0.0272841	1.10055	0.445743	0.843017	2.02543	0.612145	0.316487	0.182533	0.0933903	0.0513763	13.4227	1.31046	0.396968	54.5	2.54159	0.19346	89.9239	2.08793	0.174717	184.279	5.1018	0.170724	36.1089	0.987726	0.0673824	12394.9	91.0202	0.148599	BelowLOD	69.751	90.8687
CQGN - 2.d	30	BelowLOD	294.933	598.528	26.1179	4.36559	4.71007	475406	8822.21	0.473572	0.029444	0.0291909	0.0182729	17.0879	0.815213	0.0483776	0.329427	0.0896519	0.111346	8.88774	1.44383	0.463809	8.97872	1.06066	0.30208	1.13058	0.244543	0.167343	31.8117	2.54498	0.341042	92.9731	4.42022	0.141771	123.444	5.41723	0.125841	211.685	7.95813	0.159723	41.287	1.54894	0.0732431	9574.51	100.748	0.19317	139.56	72.5462	98.5724
CQGN - 3.d	30	BelowLOD	257.666	764.787	21.1795	3.20024	4.03696	474595	7475.21	0.301531	BelowLOD	0.0146785	0.06236	22.0712	0.629026	0.0657755	BelowLOD	0.0375328	0.0575107	2.45354	0.835653	0.701994	3.56595	0.768445	0.350328	0.567866	0.157645	0.182886	19.1077	1.8445	0.446139	60.4264	2.54664	0.275937	92.2075	1.88707	0.129999	171.706	4.16774	0.17855	33.8379	0.812176	0.0628482	10021.5	114.535	0.170288	BelowLOD	37.7555	66.7916
CQGN - 4.d	30	BelowLOD	256.864	661.067	27.1441	4.43598	4.25814	482796	9433.83	0.779312	BelowLOD	0.0008499	0.00863005	16.1643	0.614533	0.0379337	0.194543	0.0743406	0.114571	4.55931	0.917518	0.197202	5.35799	0.999078	0.381454	0.717193	0.166254	0.193864	26.2249	1.8845	0.3684	79.3955	2.87288	0.0922014	111.671	2.42406	0.154725	198.246	4.08801	0.279229	37.6631	0.792594	0.0517833	10192.4	101.158	0.25636	BelowLOD	40.3369	74.4094
CQGN - 5.d	30	BelowLOD	225.861	745.644	24.02	4.03856	5.4036	485222	7881.36	0.753177	BelowLOD	0.0184461	0.0738132	20.399	0.811493	0.0921605	BelowLOD	0.0612114	0.0914984	2.77506	0.803784	0.504366	4.07017	0.800132	0.728363	0.420373	0.163136	0.128077	19.0515	1.92447	0.38378	60.1332	1.84203	0.131044	85.9239	2.0471	0.184773	163.503	3.18205	0.148049	32.5778	0.810398	0.03629	9980.97	133.076	0.248466	BelowLOD	30.1227	59.5884
CQGN - 6.d	30	BelowLOD	304.503	542.977	17.8707	3.48567	3.70701	473615	9136.17	0.209875	BelowLOD	0.0101576	0.039723	24.2236	0.786211	0.0309242	0.121563	0.059657	0.0188438	2.55391	0.774533	0.391605	3.45231	0.617772	0.549121	0.394258	0.149828	0.0168983	18.8712	1.56132	0.470954	66.4257	1.94024	0.19115	96.528	1.99753	0.148246	188.269	3.03187	0.216027	35.4784	1.00437	0.016274	10765.7	113.851	0.161371	BelowLOD	32.5764	63.7514
CQGN - 7.d	30	BelowLOD	327.293	923.132	15.1865	3.44834	4.68889	472875	8457.19	0.965629	BelowLOD	0.000366893	0.0618646	18.6137	0.753717	0.0813488	BelowLOD	0.0409081	0.126448	1.21064	0.435117	0.545654	1.60437	0.526967	0.618384	0.517025	0.155003	0.165002	14.7808	1.41199	0.285259	49.8946	1.81837	0.196126	73.5089	2.01942	0.132181	145.815	3.93421	0.255338	28.873	0.740317	0.040108	10392.7	128.363	0.184206	BelowLOD	34.1538	55.0175
CQGN - 8.d	30	BelowLOD	301.403	785.262	14.6086	3.57583	4.55066	478628	8343.52	0.575989	BelowLOD	0.0111898	0.0492091	24.1563	0.903708	0.0498085	0.741007	0.145123	0.171285	11.8899	1.65017	0.384773	11.7628	1.68573	0.224613	1.30416	0.237573	0.102971	48.6649	2.50468	0.407206	132.97	3.74164	0.292711	174.906	4.04238	0.197423	295.125	6.08485	0.144219	56.9086	1.03603	0.054328	10029.2	180.123	0.143242	BelowLOD	33.383	73.3458
CQGN - 9.d	30	BelowLOD	329.248	735.826	16.8954	2.94667	4.32195	474725	6775.47	0.298539	BelowLOD	0.0165553	0.0518364	22.0104	0.705076	0.0870766	0.682646	0.145216	0.0769524	10.3765	1.25727	0.49119	12.3438	0.9809	0.161634	1.40377	0.241466	0.113146	47.5935	2.54071	0.473289	124.849	2.9084	0.319906	165.467	3.32977	0.107536	284.805	4.50032	0.1501	53.1161	1.08432	0.0320189	9721.48	122.848	0.124142	BelowLOD	32.4077	68.5926
CQGN - 10.d	30	BelowLOD	316.297	816.682	22.4671	3.32717	4.2029	478657	8080.93	0.72634	BelowLOD	0.0242617	0.0512759	14.4183	0.636873	0.0812946	BelowLOD	0.0757605	0.191989	2.1389	0.708896	0.200878	3.89455	0.656231	0.325528	0.436648	0.145413	0.178695	18.3801	1.65995	0.260103	61.6556	1.61498	0.21201	87.9021	2.2352	0.185281	158.756	3.92666	0.390978	30.6306	0.629005	0.0628835	9010.91	152.929	0.229679	BelowLOD	23.7687	59.7311
CQGN - 11.d	30	BelowLOD	348.96	748.942	16.2916	3.43929	6.16149	478002	8191.25	0.60661	BelowLOD	0.0392846	0.0544353	21.2255	0.637796	0.086296	3.76046	0.894178	0.722824	8.03973	1.17019	0.396878	9.12538	1.38934	0.696096	1.30826	0.195935	0.0374654	41.7264	2.39254	0.319407	111.291	2.7601	0.227667	152.829	2.93571	0.134303	256.726	4.95569	0.0764002	49.2755	0.784051	0.0843924	10054.8	144.994	0.204239	BelowLOD	24.0771	60.857
CQGN - 12.d	30	BelowLOD	341.357	619.767	19.5843	3.65367	5.65958	486330	10283.5	0.793919	BelowLOD	0.000550891	0.0189219	18.5798	0.743017	0.0840238	BelowLOD	5.08224	1.35719	2.00703	0.643221	0.391051	2.57514	0.592629	0.623051	0.640746	0.156021	0.0955815	16.4439	1.60132	0.434434	56.2986	2.1208	0.187076	83.8369	2.25743	0.127088	154.429	4.72587	0.241478	30.555	0.856295	0.0533349	9871.54	135.404	0.0957914	BelowLOD	19.6781	52.487
CQGN - 13.d	30	BelowLOD	323.363	781.258	26.2587	3.1796	4.90428	477704	8158.6	0.299908	BelowLOD	0.0272269	0.0440016	22.6384	0.746565	0.0665163	BelowLOD	1.00693	inf	13.6648	1.72511	0.702478	11.5272	1.39432	0.520044	1.72807	0.259428	0.0816373	48.1149	2.13259	0.468317	128.801	3.23794	0.202623	171.416	3.25132	0.099579	290.822	5.17585	0.180172	53.9843	0.950378	0.0397857	9779.85	110.546	0.0946434	BelowLOD	25.5299	54.0914
CQGN - 14.d	30	BelowLOD	237.005	719.356	25.1143	4.34266	4.50747	484685	8740.35	0.647549	BelowLOD	0.0178391	0.0252108	17.8242	0.710249	0.0792608	BelowLOD	0.318297	inf	7.60103	1.05358	0.567162	8.95046	1.23911	0.638939	1.40185	0.281749	0.105792	35.1345	2.43926	0.405683	103.897	4.42301	0.029947	128.423	4.1696	0.128959	228.059	8.13647	0.253665	42.7008	1.22451	0.0474862	9759.88	109.564	0.171487	BelowLOD	22.8308	65.437
CQGN - 15.d	30	BelowLOD	311.434	838.639	24.712	3.68937	5.56123	475758	8419.25	0.421897	BelowLOD	0.0139605	0.0251719	15.2428	0.694065	0.0838537	BelowLOD	0.116631	inf	2.10277	0.688231	0.826088	4.2983	0.762495	0.412004	0.721913	0.163973	0.106445	22.8203	1.67196	0.216572	81.2322	2.86341	0.255073	115.394	2.21741	0.0851324	203.312	4.15876	0.176666	38.6792	0.912091	0.0497696	10181.2	140.519	0.185359	BelowLOD	18.307	55.8362
CQGN - 16.d	30	BelowLOD	302.068	922.718	16.0834	3.72293	6.37415	478781	9652.86	0.212364	BelowLOD	0.0138631	0.0745961	17.367	0.732244	0.0377317	BelowLOD	0.193503	inf	7.20915	1.3495	0.493753	7.83783	1.10222	0.749171	0.892418	0.179413	0.0805669	36.6816	1.9322	0.328784	97.9186	2.65255	0.20629	133.709	2.42508	0.140725	227.62	4.55204	0.249301	44.2556	0.88858	0.0162638	9363.97	125.183	0.121719	BelowLOD	23.1271	65.0801
CQGN - 17.d	30	BelowLOD	282.112	796.868	21.8213	3.69174	3.83523	473837	7268.3	0.675475	BelowLOD	0.0166833	0.0513297	16.5758	0.532912	0.0810149	BelowLOD	0.135993	inf	6.22044	1.12166	0.0845689	5.67511	0.835252	0.361277	1.01452	0.181929	0.108382	29.2422	2.01382	0.451851	81.7976	2.31777	0.157627	119.232	2.38821	0.125299	217.512	4.24298	0.228714	42.1442	0.948548	0.0483538	10248.3	135.505	0.193981	BelowLOD	29.6408	51.9117
CQGN - 18.d	30	BelowLOD	316.506	837.084	24.7336	3.78481	6.05249	483834	8884.34	0.487409	BelowLOD	0.00683393	0.0613621	15.591	0.636828	0.0227967	BelowLOD	0.0414755	inf	1.70856	0.520167	0.532001	2.87382	0.658548	0.34989	0.500297	0.151275	0.129876	16.3632	1.75655	0.312781	54.9216	2.30103	0.23672	85.5007	2.60069	0.285933	159.143	4.36295	0.150284	30.7687	0.72459	0.0694485	9489.52	123.585	0.195316	BelowLOD	26.9058	75.1749
CQGN - 19.d	23.2107	BelowLOD	365.361	673.755	14.8141	3.19614	4.55794	492507	9337.13	0.371927	BelowLOD	0.000510606	0.0450754	19.1948	0.653402	0.0682849	BelowLOD	0.0340643	inf	1.50535	0.671805	0.295062	2.69871	0.814789	0.2713	0.313364	0.137167	0.0875054	17.5454	1.81221	0.388813	65.0556	3.96116	0.19758	98.9218	5.30886	0.0204855	182.229	9.08271	0.233275	36.6981	1.38817	0.0311975	10590.4	99.7991	0.194933	BelowLOD	23.2268	53.3903
CQGN - 20.d	30	BelowLOD	258.805	771.885	21.7967	3.25139	4.85547	473475	8509.4	0.646272	BelowLOD	0.0103866	0.0251501	25.0101	0.86665	0.0426015	BelowLOD	0.0330598	inf	2.53301	0.57496	0.238055	4.05044	0.926302	0.317674	0.548151	0.13382	0.110876	19.7674	1.4427	0.436869	64.3163	2.28338	0.209551	102.371	2.45885	0.128398	189.183	4.41419	0.122815	37.8964	0.862012	0.054151	10577.9	116.181	0.15892	BelowLOD	26.6036	52.68
CQGN - 21.d	30	BelowLOD	331.207	770.942	21.4562	4.0122	6.94229	483638	8977.63	0.452844	BelowLOD	0.000532873	0.0709642	25.8409	0.870322	0.0749565	BelowLOD	0.104898	inf	11.2834	1.68012	0.396202	13.7828	1.48795	0.236566	1.29923	0.279501	0.0856369	49.1405	2.43795	0.488799	137.21	2.75266	0.1842	183.69	3.05213	0.179843	304.369	6.92957	0.171416	57.7108	0.993653	0.0437541	9959.18	120.917	0.111196	BelowLOD	25.7953	65.7069
CQGN - 22.d	30	BelowLOD	274.922	650.437	24.5511	3.72709	6.96344	477460	9921.49	0.467486	BelowLOD	0.000657005	0.0528959	19.3397	0.764341	0.0487443	BelowLOD	0.0350794	inf	3.77762	1.00788	0.394811	5.81025	1.0161	0.30439	0.784734	0.144174	0.0723096	29.8893	1.97125	0.172906	95.8681	2.99114	0.107115	139.283	3.03524	0.0963596	243.825	5.22162	0.211953	45.2486	1.00657	0.082404	10333.4	113.389	0.119053	BelowLOD	21.4836	58.5172
CQGN - 23.d	30	BelowLOD	356.915	1084.81	32.203	5.27496	5.2474	480183	9459.26	0.471603	BelowLOD	0.0119996	0.0402392	14.6522	0.509272	0.089498	BelowLOD	0.0418095	inf	1.50367	0.458241	0.411323	3.02228	0.665889	0.458926	0.724454	0.187791	0.141492	16.566	1.47749	0.259969	61.6716	2.34551	0.1254	87.7207	1.78933	0.154486	162.769	3.7081	0.249253	30.9575	0.762818	0.015744	8965.6	92.6038	0.102664	BelowLOD	23.6546	58.1263
CQGN - 24.d	30	BelowLOD	326.529	738.699	24.1129	4.51692	6.05064	477352	10476.8	0.679562	BelowLOD	0.0141985	0.0668933	21.11	0.739609	0.0673418	BelowLOD	0.0555204	inf	7.09769	1.11765	0.381265	11.6188	1.20136	0.576	1.33764	0.240433	0.0612713	44.0434	2.10019	0.331374	124.302	2.7296	0.193095	164.225	2.98848	0.127399	271.226	5.87421	0.159138	50.7565	0.958439	0.0442263	9993.31	123.236	0.103178	BelowLOD	22.2028	54.9337
CQGN - 25.d	30	BelowLOD	323.768	803.861	14.6837	3.92215	8.24414	477571	8916.57	0.862046	BelowLOD	0.000951138	0.0467937	22.9024	0.672725	0.0651965	BelowLOD	0.0147678	inf	2.10037	0.633441	0.404323	2.71101	0.545248	0.221168	0.254404	0.0929035	0.127898	17.5485	1.81837	0.42818	64.9138	2.30973	0.199458	104.749	2.42909	0.226934	192.04	4.11724	0.252741	38.3246	1.1091	0.0383188	11291.5	114.733	0.216419	BelowLOD	25.6917	67.3115
CQGN - 26.d	30	BelowLOD	291.595	712.074	34.5666	5.79325	7.3459	487911	9206.2	0.438334	BelowLOD	0.0259825	0.107285	17.3485	0.643686	0.0223415	BelowLOD	0.0307096	inf	1.49287	0.51297	0.653912	3.16714	0.751383	0.451439	0.363523	0.123638	0.117642	18.7127	1.48135	0.207768	60.6015	2.12163	0.187439	88.513	1.94047	0.0975623	162.757	3.4905	0.260975	30.9817	0.639791	0.0559148	9645.87	99.3851	0.120091	BelowLOD	22.8278	60.1784
CQGN - 27.d	30	BelowLOD	334.992	721.732	28.6844	4.72028	8.0797	480231	8180.1	0.647079	BelowLOD	0.00214011	0.0398877	17.6758	0.589373	0.0613183	BelowLOD	0.0264369	inf	0.823303	0.390534	0.592335	2.66197	0.669206	0.457146	0.405038	0.132075	0.0933653	19.3764	1.95775	0.119831	65.2605	2.22535	0.150164	98.5198	2.68434	0.0432107	189.608	4.15505	0.432714	37.2143	0.950989	0.0481636	10359.3	97.0074	0.195154	BelowLOD	25.235	56.2973
CQGN - 28.d	30	BelowLOD	257.613	921.043	21.4313	3.95535	7.08481	479748	8662.54	0.211737	BelowLOD	0.0164564	0.0463287	29.3569	1.07453	0.0736971	BelowLOD	0.0414486	inf	2.65485	0.666635	0.0681639	9.44949	1.59489	0.452854	1.02333	0.185552	0.0929299	41.9608	2.30269	0.580373	134.675	3.18125	0.233646	188.97	3.09697	0.110022	310.482	4.74144	0.197957	60.2016	0.857601	0.0511763	10872	125.893	0.161501	BelowLOD	22.2954	51.1663
CQGN - 29.d	30	BelowLOD	290.041	792.174	32.3318	4.55227	8.84524	477175	7778.71	0.760704	BelowLOD	0.0148171	0.0575902	22.8294	0.850609	0.0311248	BelowLOD	0.0901413	inf	10.4693	1.2161	0.205965	12.6119	1.37955	0.0729574	1.42952	0.249649	0.129415	45.0158	2.4547	0.265824	128.035	3.62207	0.342789	174.432	3.98874	0.0970282	298.198	7.40973	0.221522	55.5159	1.37496	0.035209	9878.72	83.8976	0.0537602	BelowLOD	26.3152	48.7523
CQGN - 30.d	30	BelowLOD	276.002	779.919	30.7246	5.19992	7.64089	484985	10016.9	1.06014	BelowLOD	0.00745626	0.0256434	15.547	0.662216	0.101679	BelowLOD	0.0455192	inf	3.04866	0.706798	0.143561	5.01993	0.771324	0.582107	0.861955	0.228813	0.131509	27.763	2.21099	0.354391	81.6441	3.68655	0.125121	119.067	5.3793	0.0433951	200.362	7.28578	0.3329	38.3936	1.36395	0.0462056	8853.38	148.46	0.0899941	BelowLOD	23.4372	70.5119
CTEM
CTEM - 1.d	30	BelowLOD	298.684	863.38	BelowLOD	2.2849	4.37195	475051	9257.56	0.500917	BelowLOD	0.000255489	0.0958181	4.10245	0.337611	0.0582142	BelowLOD	0.0283737	inf	12.16	3.62168	1.80219	3.94953	0.79515	0.415674	0.708801	0.185317	0.0999063	22.7259	1.35647	0.180268	100.593	2.55531	0.221613	169.894	4.1962	0.167671	313.397	7.55101	0.102631	59.762	1.3015	0.0531008	9626.52	166.966	0.221537	BelowLOD	135.123	1209.84
CTEM - 2.d	30	BelowLOD	307.791	827.447	5.06252	2.54124	3.55175	482638	8521.62	0.224821	BelowLOD	0.000773008	0.0375349	4.4278	0.316917	0.0103912	BelowLOD	0.0250218	inf	4.3672	2.21525	2.39081	2.32831	0.625976	0.493756	0.659793	0.151222	0.0697529	13.9102	1.1802	0.210254	71.4715	2.43274	0.207156	146.104	3.05755	0.132175	293.124	8.04407	0.212603	63.0061	1.57123	0.0539663	8454.57	94.7967	0.170327	BelowLOD	131.225	1205.03
CTEM - 3.d	30	BelowLOD	316.067	898.781	6.5114	2.24486	3.84192	489602	8745.07	0.829758	BelowLOD	0.0129211	0.0527688	3.80043	0.274493	0.0500723	BelowLOD	0.0540395	inf	20.1012	4.2125	1.92343	7.15943	1.06467	0.193833	1.52344	0.230011	0.120367	31.4472	1.53348	0.333538	140.998	2.8462	0.227078	250.568	4.03975	0.10062	446.005	6.18482	0.268356	91.2091	1.19931	0.0400767	8383.06	104.404	0.0540615	BelowLOD	141.984	1156.87
CTEM - 4.d	30	BelowLOD	411.132	909.848	12.0764	2.62482	4.72611	480307	8561.88	1.15896	BelowLOD	0.0132434	0.0548389	3.51677	0.319678	0.0544273	BelowLOD	0.000547542	inf	5.73774	2.22334	1.60246	1.70882	0.479944	0.266181	0.264308	0.0840724	0.158384	9.2219	1.05696	0.326586	49.6055	1.95595	0.0891786	100.452	2.08678	0.209611	193.506	4.32575	0.12384	38.934	0.8057	0.0401622	8715.02	102.899	0.151439	BelowLOD	117.704	1200.01
CTEM - 5.d	17.6909	BelowLOD	405.707	1039.08	BelowLOD	2.42385	5.42803	484138	9124.65	0.479837	BelowLOD	0.00137486	0.0093019	4.03326	0.35328	0.0729655	BelowLOD	0.0490378	inf	9.47705	3.18618	2.02692	4.34653	1.13604	0.241622	1.0199	0.258699	0.0340644	23.2726	2.02364	0.156667	97.6908	4.19139	0.0669586	174.21	5.36122	0.200066	317.354	11.956	0.370511	63.4114	2.85097	0.0378282	9931.4	153.38	0.0794515	BelowLOD	127.948	1241.27
CTEM - 6.d	25.8786	BelowLOD	336.545	1015.57	7.77868	3.90204	4.89237	485215	10973.5	0.107638	BelowLOD	0.0245104	0.0857623	4.13604	0.368835	0.0334687	BelowLOD	0.0441118	inf	BelowLOD	1.63724	2.08317	2.39121	0.767757	0.537995	0.53205	0.147869	0.123405	14.2224	1.25364	0.444628	73.8171	2.4212	0.0940998	150.076	3.31323	0.14098	308.253	5.24806	0.323683	67.6522	1.50466	0.0461722	8443.9	139.035	0.126605	BelowLOD	125.915	1027.88
CTEM - 7.d	30	BelowLOD	417.478	713.544	13.7043	3.11321	3.74376	475074	8881.96	0.658717	BelowLOD	0.010472	0.0449771	4.94101	0.359441	0.0549042	BelowLOD	0.0247709	inf	4.91692	2.08981	2.10702	2.78609	0.714229	0.425339	0.817869	0.178117	0.108574	17.127	1.39507	0.150853	90.6705	3.14347	0.230209	201.167	4.282	0.0457924	416.193	6.90186	0.216523	87.8901	1.18087	0.0463009	7380.76	82.3242	0.160202	BelowLOD	117.052	930.965
CTEM - 8.d	30	BelowLOD	368.672	860.267	10.0153	2.88456	3.47279	482223	8518.35	0.220513	BelowLOD	0.000481809	0.0659873	5.08745	0.380846	0.0372926	BelowLOD	0.0239286	inf	5.26233	1.94625	0.66401	3.86537	0.764806	0.398303	0.539456	0.148848	0.0868862	15.75	1.1373	0.418281	81.1243	2.76152	0.197024	169.953	3.27947	0.140377	330.386	5.71788	0.217819	70.3767	1.26566	0.0586275	9422.79	108.644	0.161161	BelowLOD	107.936	844.869
CTEM - 9.d	30	BelowLOD	323.447	911.635	11.4038	2.9741	4.21359	475955	9051.89	0.970122	BelowLOD	0.0189247	0.0583699	3.67448	0.297624	0.0483359	BelowLOD	0.0928543	inf	13.0786	2.9753	2.00879	6.85695	1.13392	0.508035	1.27605	0.211064	0.165853	27.4539	1.9069	0.336302	117.115	5.29491	0.135744	189.017	6.30628	0.141999	317.995	10.3353	0.172463	61.7121	2.21863	0.0077311	7762.17	96.3386	0.255206	BelowLOD	90.2164	677.373
CTEM - 10.d	30	BelowLOD	301.734	755.098	BelowLOD	2.54092	4.69824	474152	9762.04	1.0719	BelowLOD	0.0103343	0.0363445	3.81058	0.249052	0.0655025	BelowLOD	0.0759593	inf	4.28342	1.91669	0.859833	4.26807	0.861644	0.260678	0.732194	0.166554	0.0327864	22.5483	1.4431	0.295947	93.0096	2.54679	0.13868	162.517	3.45438	0.10705	291.845	8.26824	0.228391	58.1842	1.05209	0.0153576	9588.36	91.2128	0.0742574	BelowLOD	94.8424	616.428
CTEM - 11.d	30	BelowLOD	310.952	749.601	14.796	3.75185	5.07765	477240	8824.25	0.74358	BelowLOD	0.0116818	0.0256997	4.66449	0.329533	0.0713131	BelowLOD	0.35285	0.783301	11.4398	2.03234	1.04323	7.11696	1.08409	0.187357	2.00491	0.254232	0.096531	41.126	2.03584	0.245319	170.307	3.28578	0.236935	276.958	4.27235	0.0858206	478.231	7.98212	0.211531	91.4315	1.33278	0.0395498	7662.63	90.3421	0.127968	BelowLOD	48.3093	180.256
CTEM - 12.d	30	BelowLOD	279.755	820.172	15.3172	4.61126	4.34271	476535	7757.62	0.72843	BelowLOD	0.0267912	0.0703092	4.94329	0.360333	0.0225098	BelowLOD	0.534459	0.512315	12.0232	2.40658	0.893699	10.2801	1.59374	0.517825	2.50073	0.245948	0.0360289	48.5317	2.61143	0.188937	185.978	2.95801	0.290646	297.393	5.23282	0.150992	503.743	8.40429	0.259036	97.633	1.50717	0.0492324	7404.27	67.3137	0.170149	BelowLOD	46.2735	123.501
CTEM - 13.d	30	BelowLOD	350.032	783.101	14.4167	3.21191	6.40503	475201	9839.5	0.946711	BelowLOD	0.0108574	0.0826868	4.26999	0.340338	0.0222856	BelowLOD	0.42456	0.656543	11.313	1.82603	0.721127	6.88537	1.20797	0.324913	1.64039	0.258429	0.0795776	33.6594	1.88394	0.326302	149.83	3.64274	0.26954	252.166	4.02625	0.135386	452.73	6.64055	0.262883	89.5536	1.38722	0.0691386	8127.63	100.534	0.194351	BelowLOD	41.9848	140.022
CTEM - 14.d	30	BelowLOD	371.901	917.556	9.96772	3.60078	5.43433	477587	8769.68	0.586358	BelowLOD	0.00990672	0.026733	4.09637	0.295558	0.0710181	BelowLOD	0.271697	0.284467	2.70907	1.09026	0.725385	3.07528	0.705025	0.384626	0.898836	0.194374	0.112863	16.7716	1.31675	0.437364	77.6495	2.89877	0.190868	150.529	4.24167	0.0917894	316.09	7.45407	0.0744206	64.4558	1.82651	0.0555819	8370.65	105.367	0.19205	BelowLOD	48.7466	144.977
CTEM - 15.d	30	BelowLOD	433.32	726.553	10.3633	3.87411	6.88708	478615	11230.4	0.246481	BelowLOD	0.00688881	0.0757649	4.1843	0.365944	0.0344862	BelowLOD	0.23533	0.885323	2.27804	0.923387	0.811229	1.98704	0.690737	0.658821	0.65453	0.178247	0.0778157	11.3147	1.22042	0.444676	55.8346	2.12686	0.0967395	106.31	2.66308	0.136553	218.848	4.87525	0.175575	44.3007	0.93686	0.0237269	9072.47	114.437	0.204543	BelowLOD	49.4344	128.834
CTEM - 16.d	30	BelowLOD	306.861	826.126	20.3104	4.99411	5.08586	474936	8645.17	0.552582	BelowLOD	0.0181221	0.039941	6.80624	0.422403	0.0488806	BelowLOD	0.441979	0.398579	4.22013	1.29354	0.726569	4.02584	0.712813	0.555194	0.929575	0.19624	0.0614437	21.9109	1.88949	0.223006	120.498	2.98544	0.148694	275.317	4.46669	0.0738494	557.357	7.08318	0.356598	115.195	1.67934	0.0496149	7275.36	65.3417	0.16685	BelowLOD	40.0149	127.54
CTEM - 17.d	30	BelowLOD	457.727	717.316	11.6208	3.43955	5.62543	478449	8273.22	0.706206	BelowLOD	0.0211553	0.0652477	4.65606	0.353025	0.0879043	BelowLOD	0.686374	0.697601	8.63554	1.60548	0.915867	7.84044	1.33009	0.146999	2.17136	0.291809	0.164585	38.6883	1.81045	0.362764	149.726	3.81501	0.215003	255.225	4.13624	0.169393	473.317	6.58916	0.0749305	92.9343	1.89534	0.0411832	8594.32	157.894	0.142247	BelowLOD	36.1679	115.343
CTEM - 18.d	30	BelowLOD	309.649	861.293	15.6783	3.3595	5.83878	485496	9725.46	0.804075	BelowLOD	0.0105685	0.0416277	4.16449	0.344639	0.0312178	BelowLOD	0.60806	0.793442	10.224	1.32571	0.468413	5.38018	1.05982	0.452744	1.40663	0.237793	0.150199	26.4189	1.61734	0.477399	108.801	3.26347	0.224686	177.459	2.84454	0.180055	326.533	6.37523	0.159009	65.2705	1.27227	0.0451789	7689.58	104.136	0.148486	BelowLOD	37.3145	107.179
CTEM - 19.d	30	BelowLOD	400.352	797.252	6.69619	2.7975	5.59242	483869	8091.64	0.665389	BelowLOD	0.0137726	0.0265163	3.11726	0.207359	0.0546484	BelowLOD	0.15216	0.872402	BelowLOD	0.468958	0.77038	1.18025	0.430954	0.430727	0.451404	0.144564	0.0845799	12.7192	1.17412	0.417338	58.6929	2.09445	0.18156	108.935	2.57946	0.143021	229.533	4.67881	0.232654	48.1206	1.07724	0.0438198	8883.9	67.2207	0.0915511	BelowLOD	35.0024	110.338
CTEM - 20.d	30	BelowLOD	324.37	853.811	17.248	3.71705	4.33153	479627	8488.37	0.100387	BelowLOD	0.00679742	0.0181098	6.41275	0.387181	0.0594104	BelowLOD	0.335616	0.59226	4.3735	1.13721	0.577828	4.6767	0.845248	0.469479	1.13493	0.190734	0.11765	25.9284	1.80921	0.34529	125.885	2.79541	0.306751	247.139	3.40571	0.0921851	481.644	7.83458	0.238359	99.9418	1.56505	0.0362727	8641.66	115.05	0.125236	BelowLOD	33.602	140.545
CTEM - 21.d	30	BelowLOD	302.545	789	6.12662	2.89266	5.72636	479765	8247.04	0.680583	0.0108275	0.0149977	0.00863739	5.03989	0.403115	0.0490739	BelowLOD	0.475274	1.78826	7.34375	1.5531	0.328058	6.72507	1.11502	0.459119	1.7263	0.306114	0.171122	40.3576	2.18608	0.193339	169.296	3.15098	0.182925	277.183	4.24733	0.0611379	489.339	7.15438	0.248495	97.699	1.39054	0.0448673	9188.86	134.968	0.126636	BelowLOD	29.7552	104.678
CTEM - 22.d	30	BelowLOD	323.347	758.167	8.46017	2.9797	5.32791	475222	8356.2	0.449842	BelowLOD	0.0122072	0.0417492	4.16314	0.286197	0.0225252	BelowLOD	0.449486	inf	6.32056	1.38409	0.38472	6.65586	1.08954	0.442313	1.88879	0.286016	0.141109	34.3152	2.06902	0.299331	144.757	4.17156	0.140337	243.598	5.7003	0.178358	440.692	8.65617	0.326921	88.7771	1.79253	0.0510449	8341.73	113.942	0.0249045	BelowLOD	35.2286	89.4613
CTEM - 23.d	30	BelowLOD	418.448	514.497	14.7848	4.04004	5.83262	486638	8775.55	0.938164	BelowLOD	0.00783053	0.0415655	5.41397	0.344309	0.0312312	BelowLOD	0.292559	inf	3.33868	1.0308	0.186487	3.51759	0.841609	0.422855	1.09024	0.240574	0.140495	24.7189	1.69676	0.501912	112.922	2.792	0.0628789	228.05	3.00435	0.0745712	449.849	6.34903	0.257679	93.374	1.5387	0.0431132	7593.73	62.1601	0.180047	BelowLOD	27.2714	96.2038
CTEM - 24.d	30	BelowLOD	356.702	759.471	7.24921	3.22581	5.62197	480502	8182.11	0.98749	BelowLOD	0.018343	0.057269	5.12021	0.303628	0.0670055	BelowLOD	0.391573	inf	6.09015	1.24323	0.308021	7.47638	1.14722	0.549114	1.41593	0.219489	0.0178462	32.3458	2.17966	0.0540874	143.233	4.13923	0.192762	261.176	4.7923	0.105809	470.642	10.1653	0.243264	95.868	2.16368	0.0308514	9063.75	100.002	0.0743949	BelowLOD	32.896	97.9189
CTEM - 25.d	30	BelowLOD	386.674	686.993	14.9285	4.22202	4.31557	475601	8676.26	0.883275	BelowLOD	0.0128678	0.0441092	4.81135	0.357186	0.112216	BelowLOD	0.249606	inf	2.74727	0.932264	0.181742	2.97512	0.708982	0.158354	1.01796	0.185597	0.120559	19.7233	1.54339	0.263886	101.413	2.80231	0.188465	218.546	3.86184	0.21572	479.999	8.64636	0.25585	102.174	1.75005	0.0516999	7804.54	73.6026	0.189369	BelowLOD	31.496	88.1382
CTEM - 26.d	30	BelowLOD	342.479	875.021	10.0891	3.47011	6.59531	480157	8769.47	0.760381	BelowLOD	0.000595142	0.0263461	6.03333	0.350931	0.0225511	BelowLOD	0.318988	inf	7.42406	1.28607	0.297872	7.54383	1.18787	0.381882	2.09297	0.31404	0.0938344	45.9028	2.8239	0.347455	186.676	4.21197	0.152683	310.609	4.93616	0.13962	552.046	8.35255	0.186453	107.096	1.70164	0.0400088	9183.65	150.411	0.187615	BelowLOD	30.9908	95.9788
CTEM - 27.d	30	BelowLOD	357.412	699.287	7.29596	3.52692	4.88493	473327	10024.5	0.849755	BelowLOD	0.013938	0.0582874	3.77952	0.28652	0.0703176	BelowLOD	0.122361	inf	1.44648	0.574909	0.476081	2.19172	0.622936	0.502634	0.640549	0.167904	0.0882707	15.6724	1.43386	0.267185	67.3479	3.32783	0.198378	129.725	3.86482	0.116016	269.343	5.65955	0.424491	55.782	1.25745	0.0731154	9348.31	119.687	0.140472	BelowLOD	27.6918	66.3575
CTEM - 28.d	30	BelowLOD	334.194	820.208	16.1349	4.02217	5.2772	477572	8172.56	0.529367	BelowLOD	0.00744357	0.0444069	3.86659	0.259072	0.0566124	BelowLOD	0.205722	inf	5.70065	1.18347	0.366862	6.79916	1.24732	0.319985	1.7697	0.321522	0.0768161	33.4264	2.1736	0.22427	128.988	4.52552	0.168895	207.192	4.95021	0.111583	374.038	7.98555	0.0995098	72.7159	1.93522	0.0479931	8014.55	123.376	0.135206	BelowLOD	26.0425	84.4825
CTEM - 29.d	30	BelowLOD	311.599	762.698	BelowLOD	3.23244	5.48134	482164	7854.12	0.456697	BelowLOD	0.00112147	0.0267781	4.28415	0.32695	0.0511928	BelowLOD	0.181186	inf	5.34229	1.09399	0.500108	4.36884	0.847254	0.407978	1.4552	0.263669	0.161569	26.7417	1.74249	0.519413	112.022	3.23587	0.299393	189.876	3.51516	0.167127	348.484	7.02994	0.191391	68.4861	1.37353	0.047052	9114.81	78.4279	0.202659	BelowLOD	35.1673	109.28
CTEM - 30.d	30	BelowLOD	316.604	705.798	12.8871	3.68884	5.22329	478339	7746.47	0.679765	BelowLOD	0.000249491	0.0477445	2.99993	0.306047	0.0534855	BelowLOD	0.0875534	inf	1.34397	0.567206	0.473193	1.60193	0.455921	0.367862	0.372977	0.136801	0.123532	9.71847	1.19923	0.345654	46.9329	2.07001	0.125958	87.6537	2.52145	0.087777	182.549	4.36952	0.121674	37.3465	1.01446	0.0589991	7900.16	104.221	0.156442	BelowLOD	36.1266	91.8799
NOG1
NOG1 - 1.d	30	BelowLOD	331.469	589.643	15.4394	4.3717	4.52202	474278	6486.06	0.742468	0.780988	0.125007	0.0251651	16.5907	0.871377	0.0610433	BelowLOD	0.397945	inf	16.6839	2.21166	0.145749	12.6552	1.41975	0.512331	2.52761	0.369293	0.12414	34.6184	2.5845	0.454121	95.6726	4.51096	0.182257	154.441	6.44675	0.0953505	304.651	12.9816	0.265361	61.7016	2.18074	0.0324229	8352.92	109.776	0.166771	BelowLOD	36.6018	87.0815
NOG1 - 2.d	30	BelowLOD	261.018	747.095	15.4397	3.60878	5.05974	474988	8328.53	0.505909	BelowLOD	0.0071664	0.0425086	15.7882	0.680419	0.0665906	BelowLOD	0.160793	inf	6.95232	1.00252	0.399128	8.67087	1.29403	0.539407	2.24357	0.255854	0.104685	35.2262	2.61093	0.160062	118.507	4.37191	0.172753	197.309	5.10921	0.119724	399.18	8.56466	0.22424	80.8034	1.84799	0.052534	8204.92	73.4352	0.115665	BelowLOD	31.2107	100.477
NOG1 - 3.d	30	BelowLOD	525.971	1139.41	15.9137	4.72411	6.19441	475126	11102.8	1.13134	2.90085	0.647903	0.054593	21.2406	1.62801	0.099672	BelowLOD	0.457731	inf	14.6483	2.79497	1.02132	10.1125	1.85897	0.910439	2.57077	0.385859	0.0505964	31.9028	2.69286	0.55552	97.6733	4.67636	0.117277	146.812	6.3955	0.266403	299.12	10.7289	0.191405	61.0066	1.99499	0.041183	8102.77	84.9086	0.31404	BelowLOD	77.1765	196.059
NOG1 - 4.d	30	BelowLOD	277.183	817.47	8.40894	3.07162	5.61135	479386	9595.36	0.215504	0.0504921	0.0384024	0.0401282	14.3638	0.527672	0.0218431	BelowLOD	0.0843034	inf	3.8819	0.937583	0.410799	3.73126	0.66599	0.532409	1.30567	0.230641	0.0896516	16.0807	1.22022	0.351477	57.2853	3.26427	0.149548	112.64	4.73956	0.291444	278.24	10.2396	0.0329706	63.8539	2.01387	0.041429	8670.55	124.136	0.18845	BelowLOD	41.8842	135.511
NOG1 - 5.d	30	BelowLOD	381.764	652.656	9.68958	3.27574	4.21085	467054	7412.17	0.506452	0.125192	0.0591907	0.0392764	15.0097	0.699455	0.0913326	BelowLOD	0.113797	inf	5.83269	1.09819	0.137893	6.12408	0.983896	0.720222	2.22066	0.311483	0.117913	31.184	2.25513	0.427763	101.155	5.26018	0.203237	161.127	7.109	0.0952452	338.936	11.6487	0.157091	70.9891	1.95768	0.0152672	8567.83	103.725	0.101336	BelowLOD	34.4657	148.023
NOG1 - 6.d	30	BelowLOD	310.4	546.658	13.6669	2.73331	3.64254	471803	10136.2	0.833893	BelowLOD	0.000354345	0.0653935	13.9267	0.489052	0.0489102	BelowLOD	0.0988575	inf	3.72748	0.806629	0.192911	4.39956	0.884251	0.68772	0.980716	0.210026	0.130273	18.9438	1.34377	0.536406	78.1179	2.31229	0.206111	139.133	2.58651	0.138566	316.046	5.98639	0.172674	66.5784	1.07644	0.0342997	8255.94	96.4265	0.169425	BelowLOD	54.4601	111.623
NOG1 - 7.d	30	BelowLOD	364.651	612.479	7.06918	2.68891	3.94631	477129	7957.82	0.602698	BelowLOD	0.000850679	0.0401733	10.6306	0.527874	0.0944639	BelowLOD	0.0369438	inf	2.46286	0.669685	0.547551	2.43551	0.633677	0.528647	1.01637	0.200261	0.0519252	15.0089	1.41565	0.352263	54.9717	1.95709	0.0882751	90.6503	2.59109	0.0435783	218.807	4.49101	0.211391	46.575	0.941578	0.0610578	9324.31	133.617	0.118116	BelowLOD	47.6347	161.043
NOG1 - 8.d	30	BelowLOD	353.993	806.199	12.0386	2.93789	4.90084	480786	10457.3	0.893572	0.755789	0.480238	0.0637201	16.1335	1.58828	0.0487809	BelowLOD	0.632989	inf	11.2516	3.73642	0.29824	11.4619	2.14448	0.559181	2.87083	0.562928	0.108197	33.6377	2.66404	0.324461	99.3747	7.67654	0.326824	161.396	10.5379	0.151609	337.931	19.441	0.277144	66.3403	3.437	0.0397121	8388.03	96.0538	0.205359	BelowLOD	53.8855	210.534
NOG1 - 9.d	30	BelowLOD	367.078	747	9.18317	2.77207	4.67943	473123	9404.42	1.15689	0.239225	0.136676	0.065033	12.6974	0.791122	0.0456639	BelowLOD	0.186806	inf	4.99232	1.2157	0.276343	4.12803	1.076	1.35278	1.20161	0.305847	0.0841082	11.6466	1.56426	0.504808	40.2396	2.76328	0.144991	85.2937	4.59506	0.0869644	243.697	10.5696	0.19124	56.2831	1.53898	0.0471977	9441.66	79.1875	0.21312	BelowLOD	51.1915	199.553
NOG1 - 10.d	30	BelowLOD	333.284	869.976	9.49626	2.20311	4.73249	476932	8630.43	0.594857	BelowLOD	0.0155721	0.0179114	11.9444	0.551116	0.0481355	BelowLOD	0.0525703	inf	3.02906	0.769764	0.31263	4.45187	0.76957	0.606952	1.01193	0.216612	0.138561	18.9196	1.36712	0.247798	73.9132	3.43422	0.0623643	125.05	3.6917	0.251452	269.657	6.88155	0.233259	58.5185	1.39926	0.0546085	8441.2	71.83	0.126385	BelowLOD	63.7859	212.857
NOG1 - 11.d	30	BelowLOD	302.327	760.727	10.3318	2.86008	4.00154	472611	9342.47	0.503231	BelowLOD	0.0101594	0.0540729	13.2546	0.625618	0.0556062	BelowLOD	0.075403	inf	2.99324	0.713828	0.284927	5.74074	0.845877	0.424355	1.23746	0.257162	0.0356094	17.7569	1.36032	0.285115	63.3977	2.17642	0.159761	121.05	2.75187	0.102835	291.163	5.15205	0.0990797	61.5097	1.3621	0.0305799	8357.36	70.1941	0.183243	BelowLOD	81.0917	256.13
NOG1 - 12.d	30	BelowLOD	350.509	878.296	11.654	2.82925	5.04719	472616	8144.35	0.626048	BelowLOD	0.000995031	0.0752036	11.2874	0.587267	0.0103515	BelowLOD	0.0145091	inf	1.41611	0.48439	0.131078	1.62813	0.549301	0.198106	0.643116	0.153668	0.0986772	8.9313	1.0833	0.27336	36.8625	1.82707	0.22362	70.8038	2.98463	0.0440514	190.013	5.81691	0.145942	41.1341	1.07414	0.0482587	9243.76	81.9871	0.169853	BelowLOD	96.2038	276.648
NOG1 - 13.d	30	BelowLOD	335.811	705.065	6.37955	2.83484	4.125	473932	9672.07	1.15336	BelowLOD	0.0145146	0.0557399	10.8175	0.578575	0.11614	BelowLOD	0.0416077	inf	0.954372	0.390893	0.131943	2.41479	0.698487	0.202	0.619683	0.160498	0.0513496	7.88427	1.24672	0.254931	33.1163	2.55299	0.256676	66.5384	3.86892	0.160288	164.962	7.3194	0.125407	35.391	1.6734	0.0447352	9080.17	79.7429	0.0549697	BelowLOD	99.667	352.244
NOG1 - 14.d	30	BelowLOD	332.705	817.582	9.25265	3.12225	4.38235	474221	8898.88	0.834835	0.145457	0.0635089	0.0535473	15.9504	0.635739	0.0104609	BelowLOD	0.0907294	inf	5.69354	1.02809	0.382393	5.52737	0.894541	0.592451	1.25169	0.248577	0.050794	24.035	1.61426	0.114021	84.2695	3.07575	0.190729	149.523	3.10722	0.163421	339.21	7.05093	0.331835	73.1281	1.31245	0.0716442	8283.37	84.0422	0.17417	BelowLOD	131.676	566.205
NOG1 - 15.d	30	BelowLOD	311.421	911.978	12.9077	2.92674	4.69862	466761	8210.74	0.211929	0.125777	0.0462729	0.0357153	21.3905	0.756563	0.0763757	BelowLOD	0.089423	inf	8.98547	1.13537	0.532625	13.2602	1.92463	0.202519	2.97126	0.315376	0.149014	51.3754	3.06184	0.553847	171.911	5.70191	0.182087	264.242	7.72575	0.121017	525.632	15.3651	0.258336	105.174	2.60254	0.0433689	8033.2	103.454	0.0255037	BelowLOD	183.736	863.736
NOG1 - 16.d	30	BelowLOD	383.482	752.141	8.14623	2.45581	3.44815	471955	8598.84	0.631954	0.240604	0.120397	0.0362658	12.7848	1.03419	0.0579124	BelowLOD	0.100187	inf	3.75168	0.858264	0.128394	4.87044	0.918136	0.70658	1.07541	0.250887	0.110342	21.2901	2.42909	0.271896	79.6466	7.15105	0.0911122	132.791	9.69457	0.0988806	284.608	18.8423	0.217687	57.6731	2.99704	0.0354682	8562.99	78.8007	0.109918	BelowLOD	266.498	1655.09
NOG1 - 17.d	30	BelowLOD	288.837	869.043	12.7383	2.48651	3.55144	476439	7403.89	0.490565	BelowLOD	0.0141741	0.0506092	14.4299	0.519673	0.11311	BelowLOD	0.0782584	inf	4.29291	0.789305	0.262394	6.0654	0.951784	0.726765	1.62488	0.265858	0.0885133	25.5819	1.67187	0.25698	89.365	3.14612	0.246431	149.531	3.39406	0.13497	330.231	8.11275	0.287724	67.86	1.35517	0.0423201	8214.47	88.8813	0.180055	BelowLOD	627.007	inf
NOG1 - 18.d	30	BelowLOD	302.491	692.752	7.73919	2.23069	4.12757	472265	7339.79	0.510501	BelowLOD	0.0113201	0.0358481	14.6295	0.503469	0.0706534	BelowLOD	0.0518363	inf	2.22974	0.573344	0.446151	3.99769	0.893862	0.810689	0.889456	0.178583	0.0776461	14.9861	1.26785	0.384983	57.7923	2.06528	0.257789	115.1	3.17343	0.129046	296.366	6.36845	0.239858	66.8152	1.55278	0.0595067	9170.1	81.573	0.170073	BelowLOD	8976.18	inf
NOG1 - 19.d	30	BelowLOD	303.879	722.03	7.7146	2.13308	3.89421	464343	7038.05	0.763769	BelowLOD	0.000234464	0.0515185	12.97	0.561664	0.0677888	BelowLOD	0.0287989	inf	0.73059	0.34893	0.272773	1.89507	0.54637	0.534726	0.553447	0.153795	0.089099	8.54216	1.19568	0.296574	39.8202	1.54665	0.252173	77.0177	2.03444	0.105046	200.428	4.06756	0.206621	45.2812	1.16818	0.0696913	8790.79	120.964	0.138423	BelowLOD	453.346	inf
NOG1 - 20.d	30	BelowLOD	342.35	906.166	7.90977	2.3259	4.51188	471455	9202.12	0.523906	BelowLOD	0.00659385	0.0724801	10.9857	0.452394	0.0383643	BelowLOD	0.0413057	inf	1.21906	0.473191	0.212177	2.16821	0.679733	0.881178	0.598949	0.150673	0.078546	9.20126	0.995567	0.286511	35.8775	1.736	0.241167	77.0781	2.06612	0.164625	221.541	5.12736	0.27389	51.9864	1.17959	0.035771	9137.22	125.92	0.13299	BelowLOD	251.884	inf
NOG1 - 21.d	30	BelowLOD	250.353	1009.18	4.09704	1.53651	2.93751	457587	8134.61	0.574688	BelowLOD	0.00675299	0.0588145	11.2395	0.490935	0.0823521	BelowLOD	0.0991642	inf	0.683782	0.324149	0.114022	1.35607	0.505545	0.463403	0.39506	0.126809	0.047037	6.91988	0.744831	0.287452	26.8566	1.22254	0.202004	63.2586	2.29739	0.162191	188.405	5.33975	0.211267	44.5725	1.23467	0.04969	9408.98	136.621	0.137088	BelowLOD	70.498	inf
NOG1 - 22.d	30	BelowLOD	289.857	931.588	9.47232	2.07144	3.06975	467756	7576.15	0.622443	0.228201	0.0793715	0.0179264	21.3169	1.01172	0.0527422	BelowLOD	0.425193	48.9439	10.9976	1.70599	0.252819	13.5647	1.45254	0.478206	3.34434	0.371518	0.103994	49.9776	3.08808	0.4154	164.566	5.12716	0.203014	249.501	6.72442	0.129645	488.026	13.2812	0.212269	96.6117	2.32771	0.0157028	7987.23	87.8348	0.164593	BelowLOD	54.571	inf
NOG1 - 23.d	30	BelowLOD	283.916	896.106	5.06402	1.59399	2.51837	472080	8132.76	0.470381	BelowLOD	0.0117858	0.0359348	13.9174	0.652375	0.0304433	BelowLOD	0.296783	0.0622752	2.34271	0.599801	0.345676	2.57914	0.62899	0.551037	0.718302	0.161818	0.143769	12.169	1.25799	0.355349	47.396	3.13321	0.0632845	96.1584	5.40715	0.0598526	253.992	11.8032	0.219569	58.4483	2.66782	0.0457364	9117.23	77.6651	0.199516	BelowLOD	55.3884	inf
NOG1 - 24.d	30	BelowLOD	365.488	598.816	5.56739	1.41023	2.48523	475987	10505.5	0.374077	BelowLOD	0.0728391	0.0932463	11.3899	0.731583	0.0804056	BelowLOD	1.46756	0.19665	1.59648	0.644193	0.526974	2.37069	0.566551	0.522645	0.767505	0.233984	0.154681	6.25972	0.76107	0.146312	36.5952	1.77819	0.156522	77.2284	3.01727	0.113079	220.64	5.39862	0.249232	50.3238	1.25621	0.0385159	10530.4	225.258	0.148608	BelowLOD	59.2512	inf
NOG1 - 25.d	30	BelowLOD	287.582	1209.15	7.08905	1.69257	2.505	474090	9223.11	0.643339	BelowLOD	0.00150639	0.0756035	14.6828	0.689817	0.0496582	6.68682	2.05906	0.0889783	4.44866	0.720697	0.322188	8.48376	1.24358	0.456677	1.98803	0.304503	0.0775833	30.1741	2.38687	0.208602	102.994	4.19013	0.181908	170.988	5.19827	0.153407	355.964	10.3684	0.249045	72.6675	2.08656	0.0600227	8519.6	116.327	0.0254125	BelowLOD	70.0079	inf
NOG1 - 26.d	30	BelowLOD	295.82	654.035	5.7715	1.71538	2.36052	475224	10656.1	0.0999262	BelowLOD	0.00135577	0.0437604	12.751	0.608506	0.0615395	0.189775	0.166878	0.0773829	0.897217	0.336716	0.157682	2.22355	0.670907	0.547481	0.598792	0.168033	0.116917	9.22953	0.931972	0.366054	36.0512	1.57537	0.141487	76.913	2.28094	0.173105	188.559	4.14345	0.0722469	42.2962	0.802422	0.0516419	8834.89	87.0022	0.17644	BelowLOD	66.1614	inf
NOG1 - 27.d	30	BelowLOD	308.515	671.745	7.65486	1.54608	3.21212	469454	8297.98	0.930951	0.0598684	0.0396436	0.0503457	14.4797	0.641414	0.0637202	1.04989	0.332151	0.0608169	4.86809	0.748036	0.245521	5.74013	1.07606	0.422414	1.63266	0.27754	0.0478508	26.1708	1.69745	0.241205	90.3428	5.91387	0.121332	151.235	7.04799	0.0593643	322.778	12.9879	0.099419	68.4761	2.13215	0.0474601	8570.11	99.7812	0.073923	BelowLOD	72.8686	inf
NOG1 - 28.d	30	BelowLOD	299.584	719.058	3.07363	1.2332	2.91674	470277	9974.48	0.611659	0.490667	0.122867	0.0680152	15.1223	0.66422	0.0310208	1.50937	0.335065	0.0362676	6.28624	0.871596	0.415262	4.50565	1.01073	0.318671	1.84295	0.266181	0.110628	16.549	1.70678	0.227103	57.0884	4.01958	0.284745	118.996	7.01245	0.0606644	317.595	14.7419	0.101624	73.3626	2.6158	0.0305406	9119.48	74.066	0.115144	BelowLOD	75.1802	inf
NOG1 - 29.d	30	BelowLOD	278.351	783.664	BelowLOD	1.4328	2.5212	474373	8964.38	0.491919	BelowLOD	0.000997764	0.0416787	10.968	0.477919	0.0908758	0.100775	0.0691909	0.0309768	2.18968	0.542865	0.391364	2.58726	0.633369	0.310388	0.758594	0.200949	0.0956086	9.41413	1.09507	0.344353	39.3498	2.10694	0.164054	85.6333	2.41316	0.132231	229.861	6.96996	0.252094	54.4269	1.4946	0.0440143	9169.71	103.27	0.22121	BelowLOD	79.4068	inf
NOG1 - 30.d	30	BelowLOD	311.377	745.533	4.28835	1.21039	2.47117	471880	8975.49	0.668509	BelowLOD	0.0194308	0.0409425	7.96526	0.70684	0.0790923	0.177511	0.0774673	0.016086	1.13842	0.436362	0.157082	1.49093	0.542405	0.373234	0.763011	0.194058	0.149457	8.26416	1.56205	0.384492	31.2624	5.41293	0.142116	63.9068	8.21478	0.18694	180.01	16.8739	0.174119	42.331	3.46506	0.0220815	10444.1	202.515	0.119467	BelowLOD	85.4584	inf
NQGN
NQGN - 1.d	30	BelowLOD	289.273	828.625	12.2933	2.41746	3.18645	472605	8747.36	0.439651	0.121865	0.0465662	0.0688732	29.0759	0.875313	0.0303583	BelowLOD	0.0634542	inf	11.6207	1.47148	0.486351	15.7526	1.7092	0.135068	2.02161	0.334026	0.120911	46.5805	2.18296	0.357767	144.524	2.61935	0.320526	195.263	3.4909	0.166538	327.407	4.97843	0.306427	61.8791	0.963272	0.0751222	10050.8	107.402	0.321226	BelowLOD	37.5312	92.6985
NQGN - 2.d	30	BelowLOD	224.222	752.35	16.307	2.79919	4.03762	468867	9054.16	0.891925	BelowLOD	0.0125415	0.0313055	23.0751	0.844256	0.117138	BelowLOD	0.035574	inf	3.86071	0.867922	0.440554	6.80626	1.03787	0.468186	0.788929	0.187	0.0197775	26.4128	2.70724	0.192737	100.276	5.25565	0.144293	148.115	5.67336	0.117472	268.253	8.79677	0.295026	50.0356	1.4951	0.0447156	10796.5	139.602	0.245477	BelowLOD	33.0123	112.388
NQGN - 3.d	30	BelowLOD	312.416	814.765	14.6766	3.16445	5.1789	474984	10103.3	0.10231	BelowLOD	0.0163134	0.0451881	29.5464	0.660265	0.0802254	BelowLOD	0.022113	inf	1.47153	0.474543	0.176688	3.37927	0.740537	0.137672	0.577511	0.150219	0.0959252	16.9017	1.36506	0.289193	64.9172	2.50073	0.135824	101.252	2.22707	0.198665	188.429	4.70269	0.165171	38.3681	0.83385	0.0740597	11343.1	79.7014	0.227861	BelowLOD	48.0232	121.333
NQGN - 4.d	30	BelowLOD	335.668	720.715	11.924	2.67397	3.25992	473981	9666.54	0.791424	BelowLOD	0.000454292	0.050412	25.8423	1.11023	0.045696	BelowLOD	0.0202856	inf	2.24286	0.599596	0.0558568	3.44964	0.68664	0.182524	0.42676	0.127387	0.119653	20.3904	1.80203	0.130127	89.6296	3.6522	0.212516	137.12	4.89564	0.0538726	244.287	8.20778	0.0907952	46.9333	1.68189	0.0501231	11418.6	97.5489	0.142783	BelowLOD	35.849	101.64
NQGN - 5.d	30	BelowLOD	266.587	545.385	13.0264	3.09331	4.36581	472970	7334.57	0.360715	0.0973325	0.0468867	0.0668432	25.0965	0.818459	0.0952381	BelowLOD	0.0671288	inf	13.2813	1.58963	0.275189	12.733	1.28101	0.322587	2.1586	0.306111	0.0415482	48.589	2.08867	0.133506	142.46	3.63591	0.266615	195.332	3.14473	0.165483	319.612	6.40439	0.180443	59.4522	0.86712	0.0590866	9182.22	125.179	0.196176	BelowLOD	38.7439	99.7922
NQGN - 6.d	30	BelowLOD	234.788	885.28	14.1733	2.81462	3.54728	473076	8893.63	0.593099	0.515398	0.125498	0.0649328	22.3995	0.963973	0.0464898	BelowLOD	0.072979	inf	9.59471	1.24065	0.275986	13.577	1.59049	0.258701	1.62042	0.252716	0.151019	32.9474	2.11028	0.331985	102.408	3.51268	0.33554	141.812	3.89484	0.182879	245.118	6.80166	0.194587	46.5162	1.14994	0.032477	9508.29	147.767	0.148725	BelowLOD	39.7297	110.863
NQGN - 7.d	30	BelowLOD	253.209	1005.65	16.5185	3.19319	3.73865	467209	7818.13	0.297584	BelowLOD	0.0149755	0.02542	29.2971	1.03501	0.0619837	BelowLOD	0.0656554	inf	6.74529	1.04468	0.453058	10.7464	1.64465	0.472233	1.23297	0.269309	0.139431	37.3928	2.52062	0.281924	124.554	4.65878	0.100563	176.26	6.20141	0.0950254	305.944	8.82527	0.321642	58.2887	1.7472	0.0147632	10906.3	90.4523	0.196584	BelowLOD	52.0911	102.673
NQGN - 8.d	30	BelowLOD	242.619	794.609	28.0656	4.02873	3.89677	477768	8504.19	0.295277	0.0982359	0.0441539	0.074259	22.79	0.756159	0.0583635	BelowLOD	0.0807917	inf	12.008	1.45185	0.786256	12.6429	1.34659	0.297857	1.87204	0.326865	0.156718	41.0849	1.97459	0.228713	126.759	3.32182	0.227261	162.911	3.82598	0.075617	275.412	5.52959	0.0923583	50.7917	1.17589	0.0673701	9013.33	157.294	0.19477	BelowLOD	47.3754	110.497
NQGN - 9.d	30	BelowLOD	318.315	764.781	31.7669	4.24115	4.00324	474556	8469.21	0.100792	BelowLOD	0.00115096	0.0410799	20.3477	0.762394	0.0512077	BelowLOD	0.0265069	inf	1.98249	0.588113	0.288456	4.56857	0.898455	0.275576	0.620078	0.178253	0.0698657	18.7769	1.34253	0.216116	66.2994	2.35735	0.144679	99.0626	2.79162	0.164956	181.175	4.21617	0.173376	34.5661	0.581338	0.033146	9294.73	115.924	0.112039	BelowLOD	47.8574	105.468
NQGN - 10.d	30	BelowLOD	306.895	790.64	18.1639	2.80913	4.52556	475325	9036.28	0.0968326	BelowLOD	0.000338342	0.0534519	21.592	0.818595	0.0348068	BelowLOD	0.0192459	inf	1.52271	0.428205	0.403627	1.91223	0.540332	0.477922	0.263256	0.119054	0.207602	11.7522	1.1527	0.188928	52.0791	1.73613	0.0582273	86.4367	2.31834	0.0930568	176.158	3.83839	0.130646	34.2238	0.823607	0.0545253	11496.7	95.0734	0.149851	BelowLOD	51.8187	133.705
NQGN - 11.d	30	BelowLOD	302.972	777.378	32.5989	3.92985	5.453	476770	6852.01	0.594354	BelowLOD	0.0133553	0.0466056	19.2067	0.85084	0.0462426	BelowLOD	0.0432717	inf	3.51177	0.808779	0.363504	6.0154	1.15451	0.348099	0.81034	0.209489	0.096256	22.1877	1.925	0.212996	75.6976	2.88735	0.18131	107.755	2.41314	0.12066	194.179	5.27557	0.0927545	37.2767	0.87028	0.0512561	9072.97	122.36	0.204365	BelowLOD	63.4188	166.187
NQGN - 12.d	30	BelowLOD	298.358	910.239	17.9297	3.72082	4.04734	475272	7956.92	0.735248	BelowLOD	0.00621232	0.0399039	14.1197	0.464129	0.0559615	BelowLOD	0.0277032	inf	1.22804	0.413245	0.486847	2.03694	0.592749	0.297985	0.333957	0.118344	0.0947421	12.6677	1.06043	0.229165	46.2645	1.72225	0.0818776	73.9859	1.86472	0.110751	143.751	3.3593	0.241188	28.2069	0.815734	0.0561634	10080.4	96.9261	0.0228414	BelowLOD	69.5126	162.927
NQGN - 13.d	30	BelowLOD	349.628	863.288	13.1881	3.36195	4.92623	465220	7714.38	0.753807	0.238009	0.0807058	0.0899623	16.3982	0.619032	0.0717076	BelowLOD	0.0781166	inf	2.1702	0.671358	0.429177	2.11524	0.536345	0.13861	0.178334	0.0967185	0.140745	9.89646	0.980127	0.189939	35.5239	1.59874	0.267048	59.3129	2.24414	0.0678908	121.091	3.70436	0.189177	24.3763	0.815789	0.0440329	11242.8	85.3846	0.112199	BelowLOD	86.8285	177.55
NQGN - 14.d	30	BelowLOD	291.416	754.846	17.8449	2.60785	4.06894	469220	10145.9	0.763228	BelowLOD	0.00111161	0.0560508	34.6659	1.01306	0.0984506	BelowLOD	0.0753419	inf	4.23466	0.919168	0.190017	7.91762	1.19939	0.306803	0.812567	0.236767	0.122734	30.6597	2.39041	0.252856	112.073	5.28507	0.237208	164.675	6.46167	0.117751	314.751	10.2793	0.0313822	60.226	1.77476	0.0418529	12144.4	93.6011	0.185615	BelowLOD	100.452	197.87
NQGN - 15.d	30	BelowLOD	281.971	664.784	21.8944	3.54541	3.59745	469210	8311.11	0.636654	BelowLOD	0.0101013	0.045536	20.7036	0.733229	0.0451762	BelowLOD	0.0302968	inf	2.07303	0.621623	0.499415	3.96991	0.886687	0.425497	0.48908	0.152362	0.0767945	19.9305	1.62438	0.244762	82.017	3.25737	0.128804	122.682	2.91597	0.108195	222.683	4.67615	0.144554	42.7313	1.06798	0.0530515	10859.1	86.2409	0.108188	BelowLOD	126.579	195.25
NQGN - 16.d	30	BelowLOD	292.413	686.758	24.1758	3.89082	3.72994	479241	7604.32	0.885789	BelowLOD	0.0160662	0.0563924	18.7007	0.643909	0.0293986	BelowLOD	0.0520597	inf	2.34759	0.712755	0.405691	3.00841	0.800463	0.386428	0.458818	0.122843	0.162133	18.0826	1.68203	0.0988231	69.8968	3.85169	0.133053	104.435	4.28638	0.0799717	186.857	7.49349	0.247594	35.8448	1.2796	0.0404922	10665.9	116.48	0.111766	BelowLOD	100.31	240.627
NQGN - 17.d	30	BelowLOD	265.749	643.547	19.5406	4.00098	3.82681	467216	8654.86	0.49891	BelowLOD	0.0137195	0.0177547	27.1199	0.681068	0.0289524	BelowLOD	0.0577611	inf	1.50131	0.528577	0.421625	4.62978	0.954118	0.475703	0.361881	0.12913	0.0990342	19.35	1.54883	0.299691	74.9825	2.05132	0.0592481	116.731	2.68577	0.144749	218.821	4.44248	0.0929543	43.1388	0.913274	0.0147366	11231.3	99.2649	0.156297	BelowLOD	119.111	214.693
NQGN - 18.d	30	BelowLOD	297.419	865.626	21.2368	3.68722	3.84694	471994	7151.76	0.0935435	BelowLOD	0.0125418	0.038141	25.2078	0.952858	0.0397255	BelowLOD	0.0792757	inf	2.62595	0.673392	0.342145	4.28275	0.87794	0.699941	0.504566	0.154566	0.0170992	20.1104	1.98474	0.370977	82.558	3.87571	0.161639	126.611	3.55662	0.167859	245.983	7.36775	0.267667	48.0796	1.25538	0.0313561	11505.5	88.287	0.204522	BelowLOD	114.916	211.168
NQGN - 19.d	30	BelowLOD	333.029	878.269	13.4056	3.46551	5.96064	462364	10465.7	0.0974875	0.482688	0.10331	0.0303495	26.6646	1.27496	0.0818395	BelowLOD	0.38856	inf	7.00214	1.37422	0.201385	6.70313	1.22531	0.474248	0.792496	0.171321	0.114913	23.4393	2.15189	0.412273	62.7939	3.65699	0.212272	100.591	3.96435	0.0188216	195.802	4.77986	0.151384	40.1851	1.06704	0.030289	13133.9	274.071	0.156766	292.6	235.825	266.707
NQGN - 20.d	30	BelowLOD	272.538	815.344	20.8318	4.14636	4.10663	470835	9295.44	0.455965	0.119163	0.0538227	0.0245895	24.816	0.873244	0.0892223	BelowLOD	0.148561	inf	1.85408	0.522478	0.311668	2.9718	0.843393	0.135618	0.513939	0.155083	0.115185	14.0494	1.19424	0.23562	49.7367	2.0438	0.215974	80.0295	2.12635	0.274424	159.433	3.8434	0.230497	31.1267	0.819603	0.037576	11185.5	95.3829	0.207253	BelowLOD	203.295	244.462
NQGN - 21.d	30	BelowLOD	261.418	789.607	7.53825	3.36638	3.70961	465122	7121.87	0.432079	BelowLOD	0.0140061	0.10004	32.366	0.839332	0.0553926	0.076454	0.081654	0.0219664	1.40731	0.537088	0.618575	2.31649	0.647511	0.318677	0.255764	0.114835	0.108551	17.1559	1.24661	0.234777	76.8756	2.04108	0.240401	138.185	2.80052	0.156859	290.624	5.96803	0.128953	58.0746	0.949652	0.0343196	14413.2	113.454	0.115859	BelowLOD	203.228	156.471
NQGN - 22.d	30	BelowLOD	272.267	679.604	19.4131	3.73884	5.07032	473072	7912.35	0.621004	BelowLOD	0.0118781	0.0383624	36.3489	1.15337	0.0744404	0.161957	0.090163	0.0987106	2.32701	0.577588	0.522849	3.28737	0.736952	0.136217	0.168401	0.0913884	0.0866069	18.8765	1.71845	0.22319	69.8662	2.03233	0.150891	113.58	2.34758	0.178569	228.196	4.5323	0.255064	44.5799	0.98898	0.0204808	12913.5	85.0965	0.281855	BelowLOD	191.468	179.444
NQGN - 23.d	30	BelowLOD	248.049	652.001	18.7132	3.7622	4.01236	466584	7795.4	0.848876	BelowLOD	0.000358926	0.0616154	29.1076	0.973999	0.00919823	0.0674118	0.0753854	0.035588	2.0423	0.632677	0.621008	3.41941	0.704179	0.186423	0.30194	0.115882	0.1074	19.5994	1.12635	0.254083	72.9377	1.81315	0.264863	111.726	2.0802	0.0984323	216.778	3.71109	0.275388	42.4906	0.875036	0.0317455	11458	63.8689	0.116177	404.917	203.702	166
NQGN - 24.d	30	BelowLOD	259.754	833.554	27.3681	3.78866	4.17312	477857	9251.89	0.40789	BelowLOD	0.00754967	0.0418667	13.9012	0.504939	0.0547478	BelowLOD	0.0308914	0.0733554	0.823193	0.442487	0.54778	1.64518	0.46234	0.230609	0.143827	0.0897318	0.0911999	9.4791	1.11485	0.31152	37.0912	1.84317	0.0992874	58.3154	1.91756	0.15716	119.778	4.01649	0.169353	23.9813	0.640299	0.0429757	10674.2	98.5662	0.2298	BelowLOD	144.885	178.953
NQGN - 25.d	30	BelowLOD	228.238	722.508	14.8343	3.79718	3.56451	472501	9696.95	0.275832	BelowLOD	0.000492497	0.118088	28.9639	0.565905	0.040123	0.0855683	0.0623495	0.0676458	1.09335	0.460439	0.68064	2.8011	0.760128	0.189858	0.251029	0.0921984	0.0843941	12.5821	1.37257	0.260773	54.88	2.19539	0.0583871	87.855	2.11667	0.11947	175.411	3.61769	0.275173	34.6031	0.791599	0.0598857	11945.8	88.1105	0.209233	336.746	135.88	143.349
NQGN - 26.d	30	BelowLOD	272.036	669.681	21.783	4.41794	4.75853	471912	8296.83	0.284309	BelowLOD	0.00194245	0.0347758	16.0648	0.666905	0.0095085	BelowLOD	0.0520986	0.0864786	1.14846	0.526462	0.221895	2.24804	0.552559	0.417181	0.189431	0.0887073	0.0790893	12.6901	1.32463	0.462532	50.6201	1.85837	0.132174	82.9919	1.94265	0.0556898	168.923	4.24887	0.2341	34.0691	0.621189	0.0357261	11142.4	97.1661	0.175116	BelowLOD	109.386	157.867
NQGN - 27.d	30	BelowLOD	330.933	1080.84	24.0443	4.3035	5.90214	470303	11926	0.88041	0.238281	0.0890312	0.00951457	23.3247	0.97975	0.0411375	1.1695	0.241808	0.0644424	18.1633	1.90729	0.584919	14.2883	1.57098	0.80651	1.83737	0.272827	0.0844147	50.8785	3.24356	0.581416	141.7	3.36642	0.322974	185.632	4.01583	0.0220078	309.633	5.5125	0.0798375	58.0152	1.15506	0.0562742	8530.54	137.086	0.175411	151.544	147.258	144.52
NQGN - 28.d	30	BelowLOD	294.523	867.609	23.9564	4.25582	4.55764	468498	9187.52	0.0947891	0.648307	0.128035	0.0386542	29.1025	0.963977	0.0354093	0.764955	0.137421	0.116639	8.88875	1.35947	0.579306	7.74302	1.26293	0.286059	1.19089	0.187682	0.036169	35.9619	3.25874	0.405845	113.168	6.51492	0.12227	154.007	8.59222	0.0904994	275.398	14.0312	0.137614	50.3643	2.57154	0.0152477	10538.3	103.232	0.198546	142.215	99.4772	120.763
NQGN - 29.d	30	BelowLOD	243.416	789.424	24.9658	4.60725	4.23061	475316	8877.48	0.540518	BelowLOD	0.0142195	0.0552024	15.3077	0.59284	0.0429172	BelowLOD	0.0133913	0.0884786	0.562162	0.353183	0.505777	1.82316	0.458121	0.325747	0.180415	0.0795384	0.159485	10.8336	1.44532	0.286739	43.3374	1.56865	0.150633	67.0434	1.67769	0.128531	132.894	3.08057	0.290543	25.8662	0.743597	0.0264633	10800.5	101.075	0.155122	BelowLOD	81.2444	137.989
NQGN - 30.d	30	BelowLOD	256.745	926.974	19.6012	3.7796	3.05085	483373	7448.75	0.412623	BelowLOD	0.000887123	0.0517989	19.0706	0.43142	0.00964072	BelowLOD	0.0361813	0.0718395	0.977512	0.476672	0.16839	2.51213	0.559652	0.342736	0.186928	0.0975621	0.175211	14.9566	1.18328	0.346316	56.3336	1.98035	0.193205	90.7492	2.09771	0.124528	171.157	3.33167	0.115686	33.3961	0.96932	0.0543024	10156.4	83.8701	0.178398	126.641	80.6056	110.445
NTEM
NTEM - 1.d	30	BelowLOD	284.137	922.227	9.49699	2.25788	3.72646	462991	7565.47	0.699521	BelowLOD	0.0405765	0.0682769	5.0866	0.341405	0.0620666	BelowLOD	0.0965871	inf	6.29215	1.29112	0.797707	7.07702	1.06997	0.393181	1.18301	0.242576	0.121546	29.8026	1.72587	0.426369	114.871	2.92818	0.209499	189.757	2.74272	0.173866	371.882	5.73647	0.0965583	74.7676	1.322	0.0327258	7585.16	90.4532	0.162389	BelowLOD	12.8052	25.6742
NTEM - 2.d	30	BelowLOD	267.647	1119.25	8.9622	2.03361	2.68358	474880	10559.5	0.942257	BelowLOD	0.0180637	0.0634853	2.86556	0.234258	0.0418407	BelowLOD	0.0452848	inf	4.92495	1.25324	0.398252	5.77159	0.99213	0.316211	0.976162	0.159679	0.0867738	26.1189	2.28651	0.236755	96.5915	2.47686	0.182247	147.794	3.127	0.0589995	264.903	4.97945	0.29548	51.5499	0.884422	0.0408718	7408.31	82.6486	0.148436	BelowLOD	13.5689	32.8185
NTEM - 3.d	30	BelowLOD	307.296	744.333	3.69842	1.58883	2.86971	473373	8308.66	0.68788	BelowLOD	0.0119097	0.0316974	4.97735	0.292194	0.0291501	BelowLOD	0.052492	inf	4.12297	1.0587	0.717817	5.11667	1.04249	0.383743	0.80105	0.169294	0.118832	20.5366	1.72695	0.487171	83.1518	5.24654	0.168342	157.141	7.40592	0.0588181	358.033	11.7996	0.25688	76.7781	2.13225	0.0637886	8587.53	93.1458	0.2634	BelowLOD	13.4123	28.7054
NTEM - 4.d	30	BelowLOD	286.158	818.45	7.72271	1.76809	3.04556	469742	7039.74	0.934497	BelowLOD	0.0121413	0.0183225	5.05579	0.28071	0.0813918	BelowLOD	0.02875	inf	2.95745	1.01411	0.426372	2.92464	0.76029	0.642801	0.357668	0.107802	0.067309	14.7314	1.32712	0.209985	76.9429	2.25035	0.179948	160.739	2.95677	0.0705268	341.519	5.37436	0.173187	69.2105	1.44058	0.0442455	7683.31	86.2931	0.146565	BelowLOD	11.9253	35.3018
NTEM - 5.d	30	BelowLOD	336.531	1293.38	8.67948	2.01293	3.23163	469980	8849.73	0.657726	BelowLOD	0.0251317	0.0448617	4.12691	0.288534	0.0677036	BelowLOD	0.0583258	inf	11.3063	2.26375	1.47793	8.47575	1.45721	0.290199	1.30363	0.234687	0.0918678	32.0051	2.42323	0.442389	125.521	3.61914	0.322377	196.641	4.40094	0.0930971	364.734	6.17706	0.166603	71.7049	1.32364	0.0661593	7537.89	78.8611	0.209613	BelowLOD	17.8168	46.907
NTEM - 6.d	30	BelowLOD	481.411	739.3	9.67134	2.29205	3.30928	481276	7566.74	0.487633	0.066877	0.039017	0.0284433	4.91041	0.380954	0.045147	BelowLOD	0.0465697	inf	8.80065	1.96908	1.23197	7.91732	1.20712	0.497821	0.989538	0.198097	0.0320583	26.8104	1.76303	0.537756	109.884	3.57788	0.0895516	190.58	3.47837	0.1095	361.943	7.17034	0.256857	71.6146	1.40231	0.0220067	8057.21	94.0185	0.0544562	BelowLOD	20.5682	48.8552
NTEM - 7.d	18.9328	BelowLOD	462.898	1018.36	10.0344	2.84538	3.34667	493838	6918.52	0.935964	BelowLOD	0.0309197	0.0640427	4.58385	0.568571	0.0527447	BelowLOD	0.0501595	inf	7.93487	2.24973	1.04024	3.66104	1.09161	0.595784	0.579405	0.177802	0.0746384	19.5075	1.88532	0.421929	80.5194	3.17489	0.295838	141.366	4.33724	0.172347	313.074	7.1908	0.172075	63.4287	1.52212	0.0509022	8119.54	134.997	0.200317	BelowLOD	27.1811	52.0499
NTEM - 8.d	30	BelowLOD	375.981	1018.93	6.43438	1.6765	2.65807	469693	8808.19	0.991477	BelowLOD	0.0260215	0.102023	5.06587	0.326817	0.0761944	BelowLOD	0.0455058	inf	10.162	1.76092	2.49112	5.93422	0.98215	0.543326	1.05492	0.208603	0.0919072	24.4705	1.60847	0.251836	93.5148	2.33638	0.247491	164.896	2.80022	0.0859393	346.998	5.11814	0.203772	68.8552	1.06993	0.0465696	8291.38	100.551	0.339194	BelowLOD	18.1357	48.1966
NTEM - 9.d	30	BelowLOD	386.994	665.701	10.0934	1.4358	2.72999	480923	6452.64	0.78339	BelowLOD	0.00292206	0.0270143	3.58835	0.258969	0.0737589	BelowLOD	0.0203054	inf	2.86368	1.2831	1.25932	2.96082	0.769526	0.280116	0.413841	0.123727	0.103641	14.611	1.35132	0.437177	59.6308	2.01804	0.263574	119.132	2.74139	0.157889	268.416	5.01582	0.226228	57.3411	1.06082	0.0212519	7187.47	76.5854	0.154494	BelowLOD	18.3257	46.8568
NTEM - 10.d	22.8427	BelowLOD	406.074	904.011	10.0282	2.16822	2.25778	494107	9112.57	0.611898	BelowLOD	0.0266416	0.0610127	3.98115	0.277625	0.0487691	BelowLOD	0.0668868	inf	16.2547	3.30366	1.55343	9.17182	1.59003	0.198724	1.59917	0.265431	0.0905896	40.1126	2.71462	0.330896	160.474	4.43349	0.187444	251.045	4.40518	0.0621959	447.597	7.55941	0.225489	86.2923	1.24433	0.0368653	7181.51	75.2855	0.209143	51.7213	28.646	50.6148
NTEM - 11.d	30	BelowLOD	341.213	958.782	5.18534	1.64832	2.55179	474819	9889	0.445498	BelowLOD	0.000833996	0.0446412	3.82723	0.350515	0.0474028	BelowLOD	0.0136846	inf	3.67094	1.29984	0.552989	2.24532	0.559952	0.779629	0.239593	0.090993	0.0877739	10.7124	1.15207	0.384242	52.3126	2.60148	0.244848	104.378	2.83737	0.127069	250.465	5.9453	0.204999	57.6236	1.42527	0.0404438	8088.74	90.0612	0.103224	BelowLOD	19.1857	50.1114
NTEM - 12.d	30	BelowLOD	381.091	940.04	7.81608	1.66988	3.00564	472469	7712.18	0.931817	BelowLOD	0.00748219	0.0677098	4.43801	0.288033	0.0520157	BelowLOD	0.0317698	inf	9.42139	2.18709	2.46281	6.26736	1.08164	0.415728	0.688378	0.161041	0.0924498	25.6986	1.64958	0.335898	102.171	2.85415	0.200814	166.207	3.1619	0.168947	333.885	6.54657	0.238922	66.928	1.35682	0.036261	7920.03	95.5786	0.0730099	BelowLOD	23.5502	50.3296
NTEM - 13.d	30	BelowLOD	317.639	855.544	5.84405	1.63048	3.27829	482412	8325.56	0.726281	BelowLOD	0.00102139	0.0445482	3.89862	0.263861	0.0799943	BelowLOD	0.0328558	inf	4.58172	1.55921	1.8617	2.98578	0.65789	0.0647614	0.427443	0.128074	0.0865711	13.0383	1.14244	0.502332	57.6987	2.07967	0.210014	112.138	2.36135	0.0599776	262.557	4.70022	0.187588	55.7058	1.07678	0.0295843	7901.63	90.7057	0.131292	BelowLOD	24.6452	66.3616
NTEM - 14.d	30	BelowLOD	226.826	877.166	7.83466	2.19739	2.57436	477076	7459.21	0.669905	BelowLOD	0.00767908	0.0885518	3.6943	0.340997	0.0480706	BelowLOD	0.0209715	inf	4.19315	1.46149	0.323687	2.45164	0.628402	0.511429	0.367004	0.115319	0.0722069	12.7331	1.42456	0.270003	56.8766	2.70398	0.157967	109.07	3.29476	0.128909	250.733	5.73912	0.232421	52.8744	1.15085	0.0211392	7695.98	68.5213	0.16644	BelowLOD	26.2401	55.0615
NTEM - 15.d	30	BelowLOD	287.725	866.847	10.1512	2.13588	2.53501	467735	6739.31	0.67364	BelowLOD	0.0136263	0.0406225	5.31116	0.290162	0.0432378	BelowLOD	0.0214916	inf	6.63636	1.76207	2.61217	1.96837	0.570006	0.242868	0.311606	0.0861	0.0717749	13.4246	1.29868	0.231656	61.0337	2.09754	0.061339	131.487	3.45516	0.0968595	315.277	6.81967	0.070479	70.0608	1.71845	0.0757824	7774.45	95.9804	0.214487	BelowLOD	28.1529	67.4768
NTEM - 16.d	30	BelowLOD	418.836	851.493	10.935	2.13213	2.89014	472073	7891.71	0.103187	BelowLOD	0.0121569	0.018543	3.73835	0.272013	0.0966358	BelowLOD	0.0293563	inf	16.4027	2.74403	2.9453	7.0401	1.14237	0.344702	1.37836	0.23412	0.0909644	41.2871	1.89832	0.229902	147.903	3.10645	0.194084	221.634	3.40323	0.133353	408.042	4.88969	0.2149	80.4236	1.34669	0.045937	7052.99	68.1145	0.217435	BelowLOD	21.8264	71.1634
NTEM - 17.d	30	BelowLOD	387.952	1216.5	7.44674	1.73181	2.58104	475033	8232.74	2.1826	BelowLOD	0.013842	0.0188938	4.21442	0.248835	0.0484442	BelowLOD	0.031162	inf	4.21732	1.60927	2.10928	4.27829	0.851066	0.43049	0.491408	0.143256	0.0841995	16.3249	1.3952	0.285357	71.5911	2.33024	0.259952	131.384	2.53907	0.0979928	297.444	4.54619	0.0996184	63.9281	0.99452	0.0337493	7575.63	82.6529	0.0736843	BelowLOD	29.5688	86.3078
NTEM - 18.d	30	BelowLOD	372.689	704.299	7.60894	1.70178	3.11582	478277	6499.95	0.478157	BelowLOD	0.00661795	0.0261857	3.59897	0.3058	0.0527773	BelowLOD	0.023576	inf	12.8483	2.99423	3.79097	4.32306	0.907372	0.0686158	0.65622	0.149105	0.0887825	19.9956	1.55637	0.449488	79.3609	2.32158	0.0289432	130.643	3.30097	0.219044	256.737	4.92172	0.268389	51.6274	1.07258	0.0339086	7944.02	77.7999	0.12721	BelowLOD	27.9256	102.798
NTEM - 19.d	30	BelowLOD	354.87	801.122	7.44129	1.6283	3.25124	475381	8088.75	0.381054	BelowLOD	0.0120571	0.0375983	4.17348	0.352963	0.0920474	BelowLOD	0.0401173	inf	13.6377	3.05309	2.23831	4.54754	0.836049	0.0687751	0.617793	0.127021	0.0886361	20.8752	1.71993	0.0488699	83.1689	2.23473	0.342538	154.608	3.92742	0.044435	327.063	5.16184	0.200053	66.6878	1.13839	0.0486565	7898.9	99.1212	0.135808	BelowLOD	40.8108	89.2
NTEM - 20.d	30	BelowLOD	355.892	920.376	9.45838	1.74458	3.3316	475810	7865.57	0.756848	BelowLOD	0.000282287	0.0413558	3.54368	0.299844	0.0672271	BelowLOD	0.0251036	inf	6.81494	2.31902	1.49573	3.12032	0.624106	0.328162	0.578545	0.166182	0.0666784	14.4844	1.24177	0.354334	58.5337	4.27593	0.285143	102.825	5.58179	0.124009	224.792	12.1667	0.158247	46.6446	2.43234	0.048569	7873.52	93.3782	0.0528442	BelowLOD	38.6806	83.908
NTEM - 21.d	30	BelowLOD	379.871	900.866	6.58273	1.84348	4.38058	479546	8013.85	0.306051	BelowLOD	0.000513505	0.0581147	4.14187	0.339918	0.0636796	BelowLOD	0.018986	inf	7.47187	2.4947	3.75986	2.02664	0.724567	0.445326	0.264709	0.109447	0.0714437	11.2302	1.25125	0.173662	48.8171	1.77421	0.0857989	102.825	2.56222	0.180271	237.759	4.54561	0.271982	53.013	1.17293	0.0539935	8149.68	87.1818	0.242681	BelowLOD	65.6032	200.309
NTEM - 22.d	19.8528	BelowLOD	472.937	1035.93	10.9827	2.20912	2.4998	483054	7914.97	0.232402	BelowLOD	0.0226796	0.0193926	3.36601	0.322639	0.0464291	BelowLOD	0.0398664	inf	21.6799	5.32462	3.82535	5.12134	0.988781	0.4328	0.656236	0.155473	0.137783	22.2376	1.75271	0.322473	88.6568	4.46172	0.305753	151.511	5.0803	0.021777	289.353	8.00959	0.167156	58.1947	1.67263	0.0311147	7466.78	116.3	0.163978	BelowLOD	91.0758	282.394
NTEM - 23.d	30	BelowLOD	371.484	1051.46	4.6203	1.75535	2.74553	472671	8516.46	0.697624	BelowLOD	0.000125887	0.0366056	6.0382	0.366481	0.0878919	BelowLOD	0.02684	inf	6.20524	2.55621	0.558474	2.61951	0.642615	0.462046	0.178706	0.0722341	0.0602573	10.0289	1.17138	0.317137	49.9083	1.97508	0.190012	102.81	2.2888	0.0748357	244.666	6.13083	0.0994929	54.3483	1.40715	0.036543	8486.32	102.479	0.183665	BelowLOD	79.2253	257.92
NTEM - 24.d	30	BelowLOD	356.014	971.635	8.02761	2.1818	3.84006	477303	8210.61	0.104421	BelowLOD	0.000648007	0.0415707	3.78296	0.296117	0.0226394	BelowLOD	0.0139588	inf	5.81596	2.24964	4.82147	1.03923	0.491839	0.252324	0.228836	0.0812387	0.0871512	8.93825	1.00654	0.313661	40.2591	1.44697	0.164266	88.6813	2.49103	0.159399	206.836	5.25234	0.12435	45.2016	0.918178	0.0864162	7920.36	138.596	0.0919972	BelowLOD	79.5695	299.943
NTEM - 25.d	13.7351	BelowLOD	604.783	924.501	9.11519	2.96697	4.55987	483018	8376.03	0.358043	BelowLOD	0.0222937	0.0548428	3.99221	0.457981	0.0782936	BelowLOD	0.0284551	inf	10.4867	4.23243	1.82874	1.66408	0.695298	0.549292	0.174186	0.121835	0.108	9.80276	1.65491	0.368909	37.2379	2.02317	0.20186	72.606	2.55551	0.0720458	168.659	3.75078	0.212712	35.8285	1.10091	0.0733284	8484.26	178.305	0.219787	BelowLOD	150.845	363.973
NTEM - 26.d	30	BelowLOD	322.893	843.519	8.16058	2.01798	3.12594	476718	7708.25	0.796068	BelowLOD	0.0115437	0.0505652	4.0671	0.34207	0.0913723	BelowLOD	0.0277763	inf	13.1298	3.1168	3.379	3.17072	0.6779	0.434205	0.429398	0.122888	0.0723904	14.2811	1.23266	0.173606	58.4836	2.95124	0.193496	114.73	3.7325	0.0974356	262.351	6.52281	0.207811	58.0052	1.0904	0.0302472	7949.51	107.149	0.196172	BelowLOD	102.362	442.018
NTEM - 27.d	30	BelowLOD	297.297	903.666	9.23407	2.08457	4.09521	480007	10145.5	0.438291	BelowLOD	0.000537751	0.0439225	3.92723	0.31159	0.0616532	BelowLOD	0.0480899	inf	20.2538	4.01208	3.54548	5.08004	0.967098	0.066003	0.62156	0.131722	0.0733915	21.2619	1.36537	0.24914	85.4738	2.5937	0.149609	151.393	3.37682	0.150417	305.161	5.85561	0.143043	63.3854	0.948613	0.0517166	7971.24	111.114	0.208404	BelowLOD	106.846	512.851
NTEM - 28.d	30	BelowLOD	326.324	925.099	20.2325	2.6517	3.64911	480240	9508.43	0.221259	0.0793431	0.0479551	0.0579868	4.66487	0.350084	0.0515792	BelowLOD	0.0750598	inf	37.2326	6.37753	3.09921	9.83652	1.43223	0.286454	1.19683	0.17875	0.0977055	45.6444	2.45399	0.441218	212.326	6.20585	0.207738	350.876	5.20854	0.177782	601.256	9.95723	0.160822	114.169	1.71883	0.063286	7400.55	91.8412	0.14561	BelowLOD	115.731	584.603
NTEM - 29.d	30	BelowLOD	353.946	972.519	11.2073	2.87706	4.15802	487124	8345.05	0.533643	BelowLOD	0.0091548	0.0915269	2.55957	0.260946	0.0664114	BelowLOD	0.0124636	inf	4.51174	2.55107	0.96975	1.68945	0.572431	0.38645	0.326866	0.108438	0.097218	7.33254	0.931375	0.0518335	36.2423	1.5594	0.196926	65.365	2.51442	0.105999	131.307	3.99739	0.184826	27.1589	0.681849	0.0676958	7761.43	135.988	0.0264389	BelowLOD	145.608	769.167
NTEM - 30.d	30	BelowLOD	319.764	654.225	13.1738	2.90726	5.1252	477266	7529.14	0.766185	BelowLOD	0.0238712	0.0256297	3.34411	0.299626	0.0220225	BelowLOD	0.0421527	inf	8.80255	2.98957	2.58731	1.89297	0.463975	0.424544	0.231152	0.0911342	0.158377	10.0705	1.1689	0.248442	42.2887	2.03985	0.279084	80.8141	2.98428	0.0749792	181.438	5.54645	0.218555	38.668	1.2324	0.0467229	7857.21	79.471	0.052754	BelowLOD	140.191	958.314
REFERENCE MATERIALS RUN 1
Z_91500
91500 - 1.d	30	BelowLOD	358.523	1162.48	10.2586	2.76767	4.74516	470949	6914.71	0.639305	BelowLOD	0.0113893	0.0253235	2.64079	0.21598	0.00974889	BelowLOD	0.0149986	inf	BelowLOD	0.470706	2.52475	BelowLOD	0.237414	0.672471	0.244227	0.0909921	0.109519	1.54327	0.409837	0.183108	9.46402	0.890443	0.0818299	22.4578	0.995802	0.0407507	58.3384	1.91583	0.147474	11.4113	0.469447	0.0146002	5501.02	46.5515	0.0845051	74.5432	20.9175	53.828
91500 - 2.d	30	BelowLOD	374.498	943.621	5.12493	2.10348	4.43793	479060	9218.98	0.840543	BelowLOD	0.00705719	0.0403245	2.36284	0.225043	0.0467295	BelowLOD	0.0245647	inf	BelowLOD	0.334237	0.775423	BelowLOD	0.1752	0.398481	0.13744	0.080762	0.120352	1.86899	0.487861	0.201583	9.05943	0.910411	0.120253	21.1857	0.901413	0.0838398	56.1764	2.34367	0.0867269	11.8003	0.459213	0.0347169	5488.4	48.43	0.111326	BelowLOD	17.9625	41.3611
91500 - 3.d	30	BelowLOD	361.819	920.998	4.38319	1.70995	2.57457	482302	7285.55	0.466713	BelowLOD	0.0201447	0.0305298	2.9824	0.3023	0.0282955	BelowLOD	0.0835877	0.0505091	0.171085	0.23245	0.170046	BelowLOD	0.315011	0.822237	0.295	0.11272	0.0860551	2.26195	0.556777	0.374304	10.5716	0.708348	0.145933	21.2988	0.897395	0.0955264	56.8464	2.14293	0.157109	11.4382	0.392442	0.031375	5482.26	46.2321	0.194817	19.5739	10.0583	18.1851
91500 - 4.d	30	BelowLOD	371.538	964.711	2.1547	1.35393	1.7888	481301	8669.58	0.38221	BelowLOD	0.0126193	0.0462418	2.61054	0.275229	0.0644261	BelowLOD	0.645011	inf	BelowLOD	0.183372	0.351372	BelowLOD	0.266393	0.405788	0.336321	0.121266	0.0916305	2.4501	0.582069	0.432151	11.3293	0.900061	0.162623	22.3018	0.883523	0.0407713	58.2573	2.48028	0.0671061	11.4396	0.43316	0.0404256	5504.1	50.0392	0.0992285	BelowLOD	23.7367	40.1492
91500 - 5.d	30	BelowLOD	305.674	953.613	3.16888	1.65175	2.45613	477824	9393.21	1.24436	BelowLOD	0.00963669	0.0597375	3.01004	0.228899	0.0632273	BelowLOD	0.0270451	0.388358	BelowLOD	0.225731	0.286201	0.368538	0.214242	0.267099	0.214252	0.0872514	0.0914643	1.90428	0.553887	0.29202	9.99489	0.674172	0.206539	21.5262	1.06496	0.148641	57.5709	1.9976	0.225109	11.6659	0.39873	0.031655	5520.92	54.8831	0.108714	BelowLOD	16.8531	45.9009
91500 - 6.d	30	BelowLOD	302.119	984.506	5.50645	2.2552	3.31155	490684	9154.32	0.106097	BelowLOD	0.0117383	0.074242	2.65128	0.244666	0.0861528	BelowLOD	0.0445644	inf	BelowLOD	0.108921	0.267655	0.405957	0.257182	0.149626	0.211595	0.0907066	0.140777	2.02459	0.488574	0.395404	10.3068	0.853737	0.228382	22.8118	1.00607	0.117526	59.1227	2.15251	0.311092	11.9618	0.49271	0.00686711	5467.3	40.3021	0.207357	BelowLOD	25.2265	57.7102
91500 - 7.d	30	BelowLOD	358.658	893.16	5.90069	2.2544	5.81067	496058	8843.76	0.458219	BelowLOD	0.000441035	0.0545347	2.65348	0.20897	0.0836248	BelowLOD	0.461278	inf	BelowLOD	0.175294	0.348052	BelowLOD	0.173183	1.2514	BelowLOD	0.074824	0.113574	2.57289	0.58622	0.4034	9.93794	0.654889	0.13804	22.1164	1.05382	0.134757	59.142	1.89034	0.228187	11.5231	0.391281	0.0214723	5456.37	41.9454	0.0529526	BelowLOD	22.63	48.2348
91500 - 8.d	30	BelowLOD	407.891	792.975	5.55323	2.18753	3.04616	486270	7142.58	0.49823	BelowLOD	0.0124386	0.056378	2.83801	0.280818	0.072552	BelowLOD	0.00954052	inf	BelowLOD	0.128959	0.604293	0.563227	0.361805	0.384997	0.224752	0.0807648	0.132439	1.72871	0.499142	0.107687	10.0571	0.816445	0.114258	21.9474	1.12387	0.17969	59.9415	2.16572	0.380196	11.4512	0.47144	0.0573911	5491.8	37.3426	0.111517	BelowLOD	11.8104	23.984
91500 - 9.d	30	BelowLOD	395.197	881.896	4.59386	1.82261	3.32628	489219	9248.31	0.105409	BelowLOD	0.0102996	0.04549	2.68354	0.23147	0.0521875	BelowLOD	0.00794059	inf	BelowLOD	1.26632	2.15566	BelowLOD	0.224754	0.450256	0.186301	0.0790927	0.0913568	1.7087	0.373407	0.516457	9.36861	0.738417	0.15804	21.0117	1.22581	0.144375	55.7414	2.00673	0.0707627	11.4311	0.367578	0.0363258	5578.25	37.8437	0.0731624	BelowLOD	43.9767	131.396
91500 - 10.d	30	BelowLOD	329.094	856.032	4.7906	2.36003	4.67053	495090	10830.9	0.746763	BelowLOD	0.000283857	0.0870525	2.69752	0.227335	0.0478509	BelowLOD	0.00188116	inf	BelowLOD	0.845359	1.52576	0.253405	0.20414	0.125906	0.223502	0.0920119	0.0148344	1.68182	0.414881	0.205587	9.77347	0.774415	0.155529	20.9829	0.906643	0.145959	58.3929	2.01434	0.349752	11.8324	0.542696	0.0329433	5541.61	47.0154	0.102891	BelowLOD	103.451	460.14
91500 - 11.d	30	BelowLOD	337.197	956.892	7.32593	2.97597	4.53334	491770	6695.18	0.649154	BelowLOD	0.000774248	0.0664625	2.67487	0.325654	0.043214	BelowLOD	0.00199908	inf	BelowLOD	0.243221	0.470956	BelowLOD	0.207183	0.818621	0.175005	0.0952873	0.0834648	2.47034	0.561886	0.193242	9.64542	0.79159	0.245322	21.373	1.0061	0.0943178	60.2069	1.94416	0.2491	12.1051	0.472055	0.0360307	5516.77	51.1097	0.228949	BelowLOD	28.3072	119.628
91500 - 12.d	30	BelowLOD	304.755	846.609	BelowLOD	1.35404	3.01415	481849	9113.57	0.674956	BelowLOD	0.00678777	0.0477326	2.81843	0.255757	0.0105645	BelowLOD	0.0136494	inf	BelowLOD	0.145587	0.120909	BelowLOD	0.27206	0.631094	0.141694	0.0654624	0.0488005	1.98013	0.472757	0.332969	10.796	0.90127	0.230683	21.0933	0.908466	0.107888	60.9716	1.84743	0.275386	12.185	0.468199	0.0498505	5557.47	46.9748	0.107405	BelowLOD	82.7385	inf
91500 - 13.d	30	BelowLOD	372.441	891.85	2.34861	1.32421	1.91256	497575	8511	0.641122	BelowLOD	0.000440089	0.0572233	2.81608	0.235345	0.0210255	BelowLOD	0.000142415	0.0228596	BelowLOD	0.116462	0.177531	BelowLOD	0.218191	0.321534	0.355525	0.111728	0.144912	1.60897	0.401066	0.340322	11.0781	0.897027	0.133202	22.3013	0.780024	0.136538	58.0306	2.09565	0.114661	12.3959	0.437361	0.0501639	5457.86	48.8196	0.245873	BelowLOD	847.571	3670.87
91500 - 14.d	30	BelowLOD	278.185	797.839	3.6519	1.57702	2.74258	490092	7693.36	0.432274	BelowLOD	0.000666903	0.0702452	2.56366	0.229336	0.0783139	BelowLOD	0.00862633	inf	BelowLOD	0.205154	0.36083	BelowLOD	0.27337	0.217504	0.214655	0.10924	0.194685	2.44753	0.559288	0.202581	10.8085	0.949681	0.182673	22.4093	0.90503	0.134115	59.9719	2.10652	0.196398	11.8434	0.409334	0.0865432	5392.24	42.1563	0.263645	BelowLOD	30.3465	103.229
91500 - 15.d	30	BelowLOD	316.271	746.377	4.71705	2.37102	4.34344	495554	8658.91	0.551517	BelowLOD	0.000250505	0.056323	2.50379	0.274926	0.0281161	BelowLOD	0.0714192	1.18287	0.175842	0.224327	0.139843	0.31428	0.217153	0.295654	0.121273	0.0738142	0.0941809	1.87652	0.478992	0.163874	9.56994	0.666323	0.170067	18.6635	0.796932	0.0771426	54.1564	1.89062	0.226776	11.5844	0.407815	0.0319233	5473.15	38.6399	0.169706	303.949	265.493	227.465
91500 - 16.d	30	BelowLOD	247.084	793.926	5.68355	2.16344	3.5715	499450	8608.96	0.812687	BelowLOD	0.0101409	0.0453938	2.49642	0.232851	0.0223453	BelowLOD	0.0151578	0.100238	BelowLOD	0.160948	0.506081	BelowLOD	0.148656	0.492106	BelowLOD	0.0882029	0.115926	1.69348	0.471627	0.377199	8.45509	0.80467	0.157562	17.2708	0.750177	0.196409	48.909	2.20636	0.236256	10.3039	0.409351	0.0619063	5570.57	44.4913	0.176373	BelowLOD	27.8663	64.6778
91500 - 17.d	30	BelowLOD	275.923	991.108	11.639	3.76214	7.85087	503297	9460.63	0.578123	BelowLOD	0.000292116	0.0688462	2.6425	0.223884	0.065672	BelowLOD	0.0103574	inf	0.0784922	0.107167	0.0662902	BelowLOD	0.31493	0.480533	0.240048	0.101154	0.170359	2.4858	0.637031	0.363892	10.0347	0.833287	0.140049	19.8077	1.01151	0.148533	54.0754	2.1182	0.212477	11.8754	0.381034	0.0407909	5480.53	48.7811	0.197551	BelowLOD	23.2433	65.2367
91500 - 18.d	30	BelowLOD	354.821	865.666	16.0549	5.62662	14.8669	497341	7964.94	0.100259	BelowLOD	0.0118016	0.0184048	2.86574	0.250136	0.0527771	BelowLOD	0.015964	inf	BelowLOD	0.0713544	0.383628	BelowLOD	0.0894171	0.544152	0.205509	0.0945623	0.0891755	2.45304	0.533824	0.500157	10.1485	0.922348	0.273109	21.9179	1.20368	0.103356	55.5422	2.2871	0.181296	11.2579	0.340194	0.0433721	5495.64	40.6165	0.177617	BelowLOD	24.5782	66.9969
Z_FC1
FC1 - 1.d	30	BelowLOD	350.663	1107.45	40.4795	5.86462	4.8817	456484	8523.66	0.498982	BelowLOD	0.0263266	0.0637596	8.84597	0.484717	0.0477068	BelowLOD	0.229355	inf	37.2143	5.09965	3.57112	15.0271	1.66588	0.786642	0.398467	0.122838	0.0975208	38.8876	1.96134	0.0771899	176.3	3.33212	0.218186	264.804	3.7445	0.113231	450.425	7.03604	0.310122	83.7624	1.2255	0.040581	8966.19	80.3419	0.164861	45.7094	25.0275	42.2557
FC1 - 2.d	30	BelowLOD	348.655	839.858	15.8536	2.21357	2.71469	465440	8482.07	0.582484	BelowLOD	0.00714468	0.034047	8.43562	0.372887	0.0720274	1.86634	0.403553	0.140184	10.1264	1.39352	0.400953	13.0962	1.3687	0.77524	0.392559	0.139469	0.160868	48.7803	2.30275	0.334663	162.833	3.37486	0.196508	250.135	2.98076	0.0787342	445.739	7.57949	0.129409	81.8455	1.19955	0.0486199	9249.56	93.1639	0.219011	BelowLOD	9.85716	25.991
FC1 - 3.d	30	BelowLOD	391.756	925.017	14.2354	2.12012	2.97324	457917	8294.68	0.46911	BelowLOD	0.000264641	0.086323	8.46487	0.395236	0.0193939	BelowLOD	0.198663	inf	4.17133	0.855023	0.509115	9.19857	1.29071	0.354811	0.277467	0.117461	0.0895044	52.8019	2.68496	0.338535	158.277	3.26065	0.162911	244.306	3.84313	0.0389161	425.511	6.48769	0.328534	78.8381	1.29141	0.0063915	9556.99	99.4162	0.144836	BelowLOD	28.9702	51.7971
FC1 - 4.d	30	BelowLOD	302.779	853.532	34.2118	4.15928	5.13357	464934	7022.65	0.690866	BelowLOD	0.028951	0.0636454	7.40706	0.483852	0.0601368	BelowLOD	0.442355	inf	1.91465	0.523521	0.0546733	4.88118	0.761285	0.314696	0.210129	0.0859659	0.104573	26.5445	2.29622	0.336454	94.8819	3.90756	0.219533	151.524	5.173	0.23995	288.867	9.72164	0.251791	54.0539	1.60646	0.0363351	9220.8	117.308	0.152958	BelowLOD	27.8141	65.7055
FC1 - 5.d	30	BelowLOD	254.024	807.286	16.5325	2.55925	2.29022	465664	6777.45	0.521136	BelowLOD	0.0138083	0.10323	8.88738	0.410548	0.0417569	BelowLOD	0.0678239	inf	15.9139	2.0819	0.702622	12.659	1.36139	0.561971	0.339771	0.104978	0.0605683	51.0334	2.11186	0.146957	176.615	3.63911	0.0275269	250.861	3.85957	0.0842785	440.697	6.1462	0.250118	82.0039	1.41091	0.0291469	9051.94	106.893	0.180533	BelowLOD	14.9311	34.275
FC1 - 6.d	30	BelowLOD	322.619	775.015	33.4648	4.45314	4.79513	479006	7566.43	0.465202	BelowLOD	0.0097152	0.0388909	8.14746	0.503916	0.0214557	BelowLOD	0.264989	inf	18.2873	2.79411	0.501526	10.0419	1.33263	0.301559	0.403032	0.106766	0.0153536	46.3605	2.2417	0.176163	160.408	3.02573	0.220904	242.537	3.04502	0.125377	416.836	5.16149	0.202513	77.8107	1.28926	0.0442592	9032.55	91.487	0.113001	BelowLOD	60.4567	250.382
FC1 - 7.d	30	BelowLOD	268.203	608.797	19.7322	3.0148	3.92341	468442	7419.61	0.446271	BelowLOD	0.0061413	0.0353812	7.85782	0.356771	0.0533064	BelowLOD	0.0501688	inf	3.55834	0.860066	0.38339	8.58717	1.24062	1.16544	0.511246	0.144291	0.112115	41.7044	2.16572	0.301368	152.572	3.0798	0.278444	227.317	3.92681	0.143384	402.456	6.2497	0.14624	76.8396	1.15722	0.0535669	9202.05	128.665	0.159404	BelowLOD	116.13	inf
FC1 - 8.d	30	BelowLOD	292.056	733.747	17.1896	2.27887	3.00952	473521	8915.54	0.512783	BelowLOD	0.00748732	0.0182046	7.32505	0.392091	0.0356677	BelowLOD	0.0565478	inf	2.25787	0.619752	0.0512168	7.13534	0.980477	0.278493	0.371717	0.145093	0.172352	35.4965	1.75271	0.579552	144.052	3.83152	0.130581	215.245	3.53535	0.0664985	383.548	5.96545	0.17945	72.1327	1.38364	0.0374255	9213.81	121.012	0.10958	BelowLOD	36.9643	88.8733
FC1 - 9.d	30	BelowLOD	260.691	770.876	34.4055	4.72645	4.47966	478288	7719.67	0.807648	BelowLOD	0.0198108	0.0429687	8.55951	0.389691	0.0516886	0.431545	0.103662	0.170415	11.4101	1.57027	0.40577	13.0421	1.42924	0.508201	0.403148	0.138145	0.128909	56.6937	2.36986	0.258652	184.528	3.62797	0.226435	258.215	4.37535	0.1087	471.733	6.01018	0.248528	86.3679	1.1724	0.0157832	8531.89	119.182	0.118005	BelowLOD	46.7606	75.4451
FC1 - 10.d	30	BelowLOD	230.32	873.368	128.752	14.6007	42.4821	478308	6463.37	1.03621	0.0369658	0.0373771	0.0304171	9.14351	0.442814	0.067235	BelowLOD	0.14038	inf	5.77467	0.751236	0.294749	11.9931	1.64695	0.154548	0.286689	0.124314	0.0392429	47.7923	2.27585	0.189274	179.195	3.71198	0.249816	261.6	3.83411	0.159918	437.029	7.46669	0.197707	82.8188	1.34825	0.0616665	8674.48	111.711	0.193049	BelowLOD	20.8516	51.1345
Z_GJ1
gj1 - 1.d	30	BelowLOD	383.736	937.611	3.698	3.16222	3.50632	455423	6637.49	0.560186	BelowLOD	0.000297563	0.0446483	15.9321	0.569563	0.0290229	BelowLOD	0.0282884	inf	BelowLOD	0.629952	2.18321	1.20935	0.493031	0.673079	1.01136	0.185942	0.0962433	6.84846	0.714102	0.316465	19.659	1.15034	0.128265	29.1473	1.23748	0.0967946	61.5265	2.05802	0.297078	13.1408	0.445926	0.0503577	6549	62.3765	0.194627	BelowLOD	25.6623	55.2815
gj1 - 2.d	30	BelowLOD	335.657	779.147	BelowLOD	2.07601	3.9292	454153	8489.78	0.380806	BelowLOD	0.000531185	0.0164324	15.8738	0.537351	0.0203604	BelowLOD	0.0340644	inf	0.696753	0.514439	0.551779	1.50418	0.547295	0.340124	0.990294	0.193622	0.0986785	7.10723	0.813359	0.239324	19.9545	1.07631	0.166871	29.5536	1.34902	0.0951281	62.7589	1.91883	0.0301583	13.0747	0.418745	0.0520102	6550.83	56.1668	0.067804	BelowLOD	14.8393	32.7263
gj1 - 3.d	30	BelowLOD	340.504	849.556	3.44478	1.27011	2.83445	459491	7274.8	0.196731	BelowLOD	0.0126017	0.0235523	16.1016	0.608712	0.0478296	BelowLOD	0.0434434	0.177557	0.579372	0.338758	0.165956	0.990742	0.511247	0.646016	0.967662	0.208755	0.0844212	6.72623	0.984301	0.433238	20.198	1.11084	0.171589	29.3801	1.32687	0.100433	61.4945	2.01523	0.248415	13.5359	0.457154	0.0308743	6599.55	61.5272	0.0667941	28.8438	8.54732	25.9045
gj1 - 4.d	30	BelowLOD	366.843	593.765	4.06571	1.36699	2.6387	459673	7269.24	0.0997779	BelowLOD	0.000537554	0.03661	16.0767	0.647939	0.0621031	BelowLOD	1.97999	inf	BelowLOD	0.349948	0.728751	1.76465	0.558262	0.339745	1.03424	0.204277	0.145333	6.814	0.817986	0.347653	20.1852	1.02639	0.147457	29.1753	1.15282	0.103349	62.5807	2.22006	0.30853	12.8406	0.503506	0.0740459	6553.87	66.9925	0.150244	BelowLOD	24.6431	53.7389
gj1 - 5.d	30	BelowLOD	380.976	1005.81	BelowLOD	1.34042	3.5656	468678	7903.01	0.31471	BelowLOD	0.000801014	0.0190556	16.3117	0.569511	0.0485958	BelowLOD	0.0446286	0.5425	0.527949	0.267389	0.285752	1.63628	0.418878	0.266917	1.0136	0.199585	0.131821	7.04391	1.0526	0.228438	19.2694	1.30012	0.177527	29.3586	1.2625	0.040665	61.3046	2.38686	0.171527	13.1888	0.436027	0.0628437	6512.4	56.386	0.109219	BelowLOD	22.7334	43.1298
gj1 - 6.d	30	BelowLOD	279.893	1046.35	BelowLOD	2.1583	4.92176	464072	7397.84	0.843323	BelowLOD	0.00639323	0.102438	15.595	0.67254	0.0734266	BelowLOD	0.157487	inf	0.73644	0.331735	0.245919	2.09524	0.646462	0.237866	1.00891	0.233414	0.0962571	6.88713	1.06004	0.345829	19.8399	1.11505	0.195782	29.2928	1.17749	0.100625	62.2304	1.68945	0.292679	12.7151	0.397724	0.0662089	6594.13	53.6342	0.1861	BelowLOD	28.4902	65.0329
gj1 - 7.d	30	BelowLOD	336.608	885.833	BelowLOD	2.4541	4.83658	465596	8837.76	0.358973	BelowLOD	0.0154508	0.0355639	16.3626	0.691578	0.0634154	BelowLOD	0.957211	inf	0.538443	0.268283	0.328149	0.912543	0.468758	0.492437	0.935068	0.199667	0.143159	6.8963	0.95059	0.517504	19.7976	1.07242	0.190273	29.1652	0.927667	0.105194	61.0978	2.37819	0.219049	12.994	0.475712	0.0548265	6551.94	51.2732	0.147451	BelowLOD	17.0905	47.5645
gj1 - 8.d	30	BelowLOD	299.722	786.659	4.36639	1.78149	2.35441	465164	8435.64	0.300762	BelowLOD	0.000419134	0.0947748	15.7703	0.519554	0.0455843	BelowLOD	0.00111222	inf	1.01022	0.496983	0.990819	1.62598	0.508304	0.394527	1.03748	0.199687	0.0434929	6.8291	1.00953	0.272599	20.2359	1.14859	0.209834	29.4795	1.08065	0.106565	61.9527	2.26862	0.270228	13.4336	0.474625	0.0458214	6553.69	50.6327	0.110261	BelowLOD	12.6217	33.5492
gj1 - 9.d	30	BelowLOD	291.295	906.308	3.74928	1.61965	3.11017	471797	7760.59	0.517927	BelowLOD	0.00714547	0.0432156	16.6664	0.73691	0.106029	BelowLOD	0.0084112	inf	BelowLOD	0.810632	2.45881	1.36923	0.486038	0.349194	1.02309	0.193876	0.0412357	6.88913	0.832988	0.411034	19.546	1.20652	0.028318	29.6443	1.18689	0.19551	63.3057	2.73531	0.31473	12.7148	0.502841	0.00695274	6548.55	41.1729	0.124449	BelowLOD	52.199	119.09
gj1 - 10.d	30	BelowLOD	324.981	851.769	BelowLOD	2.21129	3.58787	469713	7735.77	0.211593	BelowLOD	0.011166	0.0541894	15.9997	0.644594	0.0672934	BelowLOD	0.0261961	inf	BelowLOD	0.918727	1.56867	1.70265	0.546546	0.481428	1.02856	0.150968	0.0784894	7.25881	0.890825	0.283993	20.1544	0.971008	0.253451	28.6502	1.09327	0.0612507	62.4632	2.66463	0.207493	13.1986	0.562285	0.0463143	6600.76	54.3614	0.100819	BelowLOD	88.2984	372.997
gj1 - 11.d	30	BelowLOD	333.34	909.535	BelowLOD	2.26384	4.82905	479655	6941.26	0.859682	BelowLOD	0.00120272	0.0608562	16.0415	0.574867	0.0479557	BelowLOD	0.0376026	inf	0.740542	0.435496	0.302615	1.18665	0.55452	0.592193	0.893729	0.179906	0.105441	6.35117	0.939567	0.293787	19.8046	1.34574	0.0613291	29.9237	1.10105	0.139381	62.1233	1.8115	0.214648	13.4198	0.452529	0.0738572	6537.27	49.7913	0.185771	BelowLOD	33.4507	89.3241
gj1 - 12.d	30	BelowLOD	272.365	844.662	BelowLOD	1.43686	3.42354	467156	7953.08	0.618034	BelowLOD	0.012989	0.0500552	15.6863	0.553072	0.0451492	BelowLOD	0.00895765	inf	0.600373	0.254593	0.269249	1.21372	0.448312	0.378275	1.14748	0.191455	0.0909367	7.11129	0.800608	0.223352	19.4983	0.998315	0.280612	28.9133	1.00405	0.159769	60.1737	2.23313	0.292747	12.8967	0.498398	0.0597027	6551.95	56.4946	0.175328	BelowLOD	62.0853	inf
gj1 - 13.d	30	BelowLOD	317.257	906.917	4.0643	1.19392	2.30706	475292	8018.71	0.443111	BelowLOD	0.0105854	0.0318351	15.9052	0.662586	0.00992279	0.0327334	0.0259303	0.026381	0.607209	0.278561	0.149088	1.88102	0.518301	0.220486	0.938905	0.200033	0.102229	6.8307	0.774404	0.213554	20.2865	1.19383	0.297146	29.5895	1.12839	0.196733	62.6012	2.2515	0.210898	13.1103	0.543673	0.0442257	6544.53	55.2934	0.023805	BelowLOD	382.545	1145.58
gj1 - 14.d	30	BelowLOD	260.932	781.288	BelowLOD	1.69371	3.70713	469832	9352.78	0.426205	BelowLOD	0.0110495	0.0667482	15.2319	0.640895	0.0761991	BelowLOD	0.0108151	inf	0.56914	0.306643	0.199806	1.28419	0.47297	0.379684	0.954122	0.221529	0.109231	6.95001	0.833364	0.227952	20.7932	1.34012	0.0830401	29.3405	1.18911	0.141749	63.6301	2.23518	0.170995	13.3137	0.422722	0.0353716	6563.02	48.2076	0.139373	BelowLOD	34.7501	87.8595
gj1 - 15.d	30	BelowLOD	356.232	642.873	BelowLOD	2.39003	4.7315	471302	7424.17	0.636283	BelowLOD	0.0113083	0.0426112	16.3353	0.589929	0.0493864	BelowLOD	0.204862	0.139478	0.706397	0.355943	0.404417	1.54006	0.478659	0.434878	1.02099	0.196252	0.118736	7.31927	0.879727	0.27004	19.5292	1.04877	0.118557	28.7555	1.2012	0.18624	61.1147	1.97013	0.147498	12.6995	0.530317	0.0433475	6586.76	52.7229	0.119662	BelowLOD	188.54	232.498
gj1 - 16.d	30	BelowLOD	250.425	627.343	BelowLOD	1.85287	4.54689	473113	7130.36	0.76	BelowLOD	0.00960488	0.0172212	16.5464	0.648455	0.0629856	BelowLOD	0.0453784	0.302527	0.439718	0.295768	0.0875432	1.40922	0.506216	0.607609	1.03562	0.168229	0.143774	6.36371	0.782321	0.246978	19.5817	1.00718	0.192852	29.9628	1.05445	0.152549	61.6591	2.48981	0.142521	13.0618	0.438651	0.0462695	6536.81	59.8333	0.0531913	BelowLOD	23.691	67.3943
gj1 - 17.d	30	BelowLOD	262.831	719.696	BelowLOD	3.58086	12.1766	472919	6794.21	0.49448	BelowLOD	0.0011195	0.0628983	15.5969	0.675632	0.083717	BelowLOD	0.00668326	inf	0.555667	0.251147	0.536025	1.3144	0.431785	0.423893	0.934941	0.232591	0.087435	6.82962	0.776725	0.335825	19.7634	0.82756	0.135655	28.7917	1.00789	0.152588	61.7026	1.99429	0.155285	13.125	0.521703	0.0341234	6541.04	57.4004	0.125162	BelowLOD	25.6977	71.8351
gj1 - 18.d	30	BelowLOD	273.934	804.586	BelowLOD	4.52197	16.8669	480031	8968.3	0.538092	BelowLOD	0.000125718	0.0926501	16.1893	0.563399	0.0799024	BelowLOD	0.0926699	inf	0.769252	0.310231	0.130801	1.37201	0.509825	0.472722	1.01911	0.213331	0.139233	7.36059	0.904378	0.430428	20.5104	1.19532	0.0876541	29.6344	1.26818	0.17977	62.4623	1.85554	0.100535	13.2738	0.539011	0.0534046	6577.07	63.504	0.163791	BelowLOD	23.6568	44.0322
Group Stats		-203.346	155.715		3.53295	0.27254		467948	3501.13		-0.0189515	0.00539009		16.0124	0.17081		0.0268326	0.00809223		0.610616	0.0744381		1.44512	0.143907		0.999731	0.0267797		6.91204	0.128796		19.9226	0.187319		29.3199	0.178122		62.0101	0.399912		13.0965	0.118714		6558.51	11.3354		20.843	8.13599
Z_OG1
ogc - 1.d	30	BelowLOD	433.958	946.737	17.0549	4.09288	3.91832	453039	9063.71	0.398142	930.714	199.104	0.0603588	1559.24	250.969	0.0415284	BelowLOD	280.959	inf	8715.87	1771.69	3.16406	155.36	26.3419	0.960144	19.6904	2.65343	0.16634	71.5073	5.7461	0.0809505	165.543	6.22338	0.184173	259.783	6.5507	0.144376	475.278	9.75129	0.126928	94.3533	1.96685	0.0459298	8218.77	82.5548	0.21353	BelowLOD	20.8681	48.1813
ogc - 2.d	30	BelowLOD	297.469	873.731	8.17892	1.77909	2.59137	467056	8302.72	0.685207	194.791	16.0701	0.0242989	1726.25	154.344	0.0285697	449.143	39.5314	0.0837334	760.086	74.7651	0.509545	97.3916	8.53554	0.345642	17.488	1.54139	0.169168	62.5793	4.17853	0.202487	70.9472	2.76419	0.0801009	117.601	6.70457	0.0887064	281.137	14.5729	0.158082	61.4974	3.249	0.0468916	8002.39	69.0906	0.1084	BelowLOD	9.36881	26.158
ogc - 3.d	30	BelowLOD	342.771	1018.76	7.42456	1.71599	3.25745	456053	7960.92	0.780912	20.6399	0.716146	0.036986	1009.34	20.3908	0.0610369	BelowLOD	3.21285	inf	220.203	9.14648	0.378722	63.6917	3.27077	0.403307	10.3967	0.776633	0.0554958	64.5359	2.88056	0.454962	85.1522	2.65942	0.0569655	137.409	3.43547	0.0399731	292.431	4.14152	0.0657676	61.4338	1.07799	0.0362667	8367.2	98.0149	0.173877	BelowLOD	25.3028	57.7165
ogc - 4.d	30	BelowLOD	294.31	883.953	10.0479	3.12606	4.41441	470671	8540.42	0.476078	3.00508	0.787351	0.0361025	27.2995	3.4195	0.0634669	BelowLOD	5.23582	inf	14.962	2.45207	0.468446	8.39938	1.3034	0.205431	2.05347	0.270574	0.0605112	17.4802	1.49848	0.321621	39.67	1.53119	0.371415	80.4805	2.18902	0.132883	214.023	6.25554	0.21748	51.1784	2.1725	0.0544793	10181.9	124.668	0.295534	BelowLOD	28.7531	83.6502
ogc - 5.d	30	BelowLOD	326.241	759.408	5.84086	1.70437	3.06493	465718	9193.92	0.668898	BelowLOD	0.0160293	0.0467378	9.73696	0.305287	0.0652572	BelowLOD	0.0202179	inf	1.38023	0.685089	0.938474	0.913495	0.448034	0.0601812	0.485747	0.142356	0.0985922	7.32089	0.828672	0.393343	30.2628	1.24853	0.0590021	69.6929	2.06636	0.198518	189.143	4.43108	0.16291	44.3037	0.90166	0.0145033	9030.99	75.2608	0.0232851	BelowLOD	12.3159	36.0492
ogc - 6.d	30	BelowLOD	323.591	945.966	13.8865	3.1545	4.7492	465055	7348.31	0.497145	10.6598	1.24295	0.0635126	69.2225	5.6203	0.0482252	BelowLOD	2.19878	inf	84.2178	9.10949	0.69311	9.0582	1.32049	0.392137	2.12724	0.233744	0.0811815	28.7749	2.4005	0.287693	95.3842	2.4768	0.14656	166.746	5.01251	0.155073	343.153	6.18034	0.297897	69.5999	1.39097	0.0737553	8315.72	82.5682	0.246938	BelowLOD	53.5128	196.259
ogc - 7.d	30	BelowLOD	335.497	779.445	5.41871	2.24173	3.49354	468634	7973.53	0.216664	5.27803	0.565804	0.0511391	140.072	10.5319	0.0545821	BelowLOD	0.50971	inf	29.3336	2.1618	0.3903	10.4487	1.09561	0.19469	2.23507	0.317097	0.0841478	24.5947	1.91643	0.547422	70.9021	3.32701	0.307146	115.694	3.52521	0.125584	261.457	6.1224	0.337815	54.5713	1.0589	0.0416237	9081.59	94.7851	0.123135	BelowLOD	116.773	inf
ogc - 8.d	30	BelowLOD	312.292	906.536	8.27021	1.87149	3.33425	468453	7179.55	0.0998296	7.23077	1.75851	0.0183329	226.48	52.4401	0.00980192	BelowLOD	1.45085	inf	46.4377	9.28527	0.221907	27.3599	2.6658	0.259781	7.31651	0.886443	0.0931156	67.827	4.82513	0.280802	217.998	10.9	0.252313	318.002	14.1972	0.0871212	608.281	25.6643	0.169883	118.18	5.25698	0.0585619	7892.49	114.299	0.145374	BelowLOD	29.8133	93.1001
ogc - 9.d	30	BelowLOD	376.113	981.928	11.1472	2.77509	5.67422	450324	11161.2	0.423118	10.7857	1.48541	0.0575072	28.2893	2.7947	0.0321639	5.15522	0.809843	0.110976	41.0057	5.6234	0.667671	10.9345	1.69791	0.225176	3.03257	0.361635	0.0988018	25.077	1.53763	0.369015	57.452	4.64155	0.135211	86.6288	7.24311	0.139007	199.465	15.0613	0.351174	41.9555	2.58912	0.0374072	9074.14	137.061	0.242754	BelowLOD	42.7296	82.0608
ogc - 10.d	30	BelowLOD	344.818	659.821	243.359	38.6237	49.1301	461804	7976.18	0.736116	114.642	7.43248	0.00834857	2367.99	323.298	0.0694348	BelowLOD	10.923	inf	625.285	42.8067	0.599107	214.501	12.9554	0.569681	48.0484	3.5947	0.124524	150.948	9.63307	0.408905	96.1786	4.94755	0.156999	90.8517	3.19712	0.18478	163.982	3.05913	0.239191	33.8729	0.88248	0.0721309	9113.09	120.572	0.213082	BelowLOD	25.7715	59.2266
Z_Plesovice
ples - 1.d	30	BelowLOD	390.601	1024.19	114.656	8.00792	4.01028	454449	7491.43	0.619564	BelowLOD	0.00678363	0.035127	1.90063	0.182202	0.0725973	BelowLOD	0.0815213	inf	4.44896	1.7497	3.48258	2.4259	0.622357	0.49513	0.639801	0.17294	0.105804	6.38478	0.694091	0.232064	36.5057	1.84891	0.0811322	37.0986	1.40934	0.0404006	47.3456	1.86986	0.111613	6.20703	0.373122	0.0320665	11109	80.3181	0.157559	74.2015	29.0919	48.5894
ples - 2.d	30	BelowLOD	363.761	837.799	60.2676	4.01603	2.66917	464704	7861.64	0.655157	BelowLOD	0.0121687	0.0240417	1.68174	0.177693	0.0547329	0.355444	0.164246	0.144526	1.42848	0.54347	0.740522	2.26494	0.58352	0.242332	0.644546	0.169259	0.0782714	8.41782	0.80789	0.322114	32.6788	1.43905	0.0263006	34.6721	1.29142	0.11628	42.393	1.61198	0.207005	6.57407	0.282232	0.0544243	11336	80.0463	0.124071	BelowLOD	8.54368	22.654
ples - 3.d	30	BelowLOD	432.64	968.673	45.9149	4.30069	2.63216	461707	7826.16	0.737373	BelowLOD	0.000641386	0.0543047	1.47285	0.18213	0.0666858	BelowLOD	0.0790355	inf	0.641051	0.297189	0.392479	1.07796	0.350179	0.377566	0.310093	0.102367	0.0777403	5.90317	0.745718	0.216542	24.3901	1.17622	0.236607	25.6678	1.14014	0.14544	33.3123	1.62584	0.195448	4.70938	0.283611	0.0195685	11472.5	99.1637	0.0480665	BelowLOD	29.3722	48.6818
ples - 4.d	30	BelowLOD	337.936	989.516	95.2685	8.67031	5.1928	463317	7769.1	0.219567	BelowLOD	0.000248976	0.0515331	1.55634	0.194322	0.0850923	BelowLOD	0.348336	inf	0.478262	0.301948	0.420415	1.19046	0.433999	0.161681	0.24947	0.0969869	0.127947	7.02325	0.824646	0.0551168	27.3636	1.71029	0.0636109	29.1641	1.09825	0.0447903	36.6544	1.68693	0.0732787	4.80983	0.269776	0.0302895	11515.5	71.4706	0.193686	BelowLOD	23.9246	70.2959
ples - 5.d	30	BelowLOD	369.477	541.528	50.7538	3.9648	3.03806	465689	7213.53	0.299012	BelowLOD	0.00036395	0.0357165	1.63622	0.165371	0.057817	BelowLOD	0.0337773	inf	3.33029	1.02	0.680887	2.70612	0.637833	0.362544	0.451246	0.138264	0.0500868	8.57835	0.952159	0.359977	31.3582	1.39177	0.17246	32.1961	1.06586	0.0583712	42.5152	1.78845	0.247679	5.62367	0.265573	0.0319656	11459.9	90.9539	0.178795	44.4178	16.7313	30.7879
ples - 6.d	30	BelowLOD	240.331	775.18	85.3347	6.77775	4.18291	466236	7566.06	0.29221	BelowLOD	0.000347799	0.0448572	1.5047	0.179252	0.0735814	BelowLOD	0.233617	0.525382	3.53593	1.02974	0.683754	2.1567	0.475602	0.379551	0.286477	0.102514	0.0879741	6.62149	0.903757	0.392525	28.2798	1.53205	0.028314	29.1573	1.4181	0.127718	38.093	1.80099	0.269564	5.20041	0.238069	0.0745024	11638	96.2002	0.185237	BelowLOD	51.911	152.739
ples - 7.d	30	BelowLOD	291.404	798.254	88.2693	4.92023	3.00414	469618	9428.82	0.621658	BelowLOD	0.00664964	0.0396043	2.25806	0.255964	0.047199	BelowLOD	0.0507535	inf	1.92441	0.504978	0.347696	3.41983	0.606282	0.184656	0.765627	0.174453	0.0340417	11.3323	1.15908	0.255151	48.6141	1.7278	0.137185	45.7948	1.09783	0.122386	60.6156	2.42886	0.232331	8.39944	0.342305	0.0535723	11367.8	99.6909	0.166239	BelowLOD	74.3076	inf
ples - 8.d	30	BelowLOD	275.484	761.388	68.9946	4.93451	2.83793	467587	9064.83	0.468663	BelowLOD	0.0149923	0.0629334	1.99375	0.206389	0.0293278	BelowLOD	0.0410375	inf	1.08813	0.375257	0.445888	4.20574	0.884023	0.357205	1.03087	0.210907	0.0586323	11.3647	1.17277	0.264439	44.4246	2.08237	0.230718	41.7091	1.45718	0.114701	54.7172	2.15637	0.157922	7.61636	0.341832	0.0348341	11419.4	83.2845	0.150678	BelowLOD	31.6554	94.969
ples - 9.d	30	BelowLOD	293.615	815.384	103.909	6.85935	3.9474	472004	9894.75	0.417837	BelowLOD	0.0148457	0.0357072	1.90263	0.217594	0.0900174	BelowLOD	0.0329494	0.0933426	2.46072	0.70847	0.585342	2.89631	0.629105	0.309202	0.664474	0.17154	0.127287	12.3734	1.42427	0.0563472	42.7709	1.97997	0.231248	38.2472	1.58437	0.236784	51.3164	1.8129	0.17494	6.96163	0.336404	0.0473732	11564.7	86.5343	0.159902	78.7153	43.2836	71.7282
ples - 10.d	30	BelowLOD	248.797	785.766	BelowLOD	43.3781	781.768	472748	7578.83	0.40709	BelowLOD	0.0128353	0.048459	2.15596	0.223385	0.0498717	BelowLOD	0.0529003	inf	1.69577	0.457727	0.433343	3.08776	0.561567	0.332802	0.826963	0.191488	0.191626	11.3662	0.852984	0.300181	45.533	1.32304	0.197206	46.2169	1.36881	0.0612234	54.3272	2.5189	0.158156	7.54874	0.263422	0.0375463	11495.6	73.0857	0.024589	BelowLOD	23.1403	59.1894
Z_R33
R33 - 1.d	30	BelowLOD	493.1	961.185	14.8768	4.00935	5.58576	458121	7698.86	0.203972	BelowLOD	0.0103975	0.0563121	6.18153	0.403102	0.00975034	BelowLOD	0.102844	inf	14.2288	2.47316	1.96877	8.70955	1.11543	0.417394	1.82812	0.265556	0.133051	33.4594	1.97378	0.274272	172.271	3.34993	0.140617	311.705	5.25837	0.0189271	584.346	8.27795	0.170919	111.823	1.76426	0.0350651	8672.54	93.7855	0.169041	BelowLOD	29.519	42.2792
R33 - 2.d	30	BelowLOD	333.528	707.077	11.5919	2.88079	3.40889	460114	8012.11	0.573039	BelowLOD	0.00923054	0.00781371	5.311	0.318996	0.0597482	BelowLOD	0.149893	inf	3.35783	0.856817	0.95616	5.74433	0.898282	0.197894	0.761736	0.192441	0.233173	21.5659	1.47174	0.273191	102.245	2.59755	0.231495	206.918	3.16498	0.0876991	482.74	7.4529	0.316098	99.8815	1.41216	0.0141509	8804.54	101.602	0.173697	BelowLOD	18.9154	33.5879
R33 - 3.d	30	2911.56	945.903	1037.89	4.59751	1.50957	3.08548	466213	8500.39	0.826248	7.44266	1.81434	0.0397867	27.494	4.41646	0.0699735	7.82364	1.65945	0.138955	16.835	3.43063	0.7659	7.90638	1.09912	0.387577	1.87726	0.275763	0.0393418	32.747	2.3403	0.240066	124.55	3.14986	0.162641	259.092	5.90108	0.119541	609.76	13.0116	0.306955	123.536	2.23693	0.0425456	10119.4	120.131	0.163151	28.4407	10.9373	22.8798
R33 - 4.d	30	BelowLOD	350.616	843.247	2.62569	1.27014	2.61026	459009	5354.35	0.222211	BelowLOD	0.012375	0.0454385	4.1677	0.357874	0.0461513	BelowLOD	1.45641	inf	0.691944	0.345767	0.0676953	0.944158	0.356929	0.123312	0.304807	0.127026	0.0358505	8.89254	0.978085	0.429413	45.7108	1.75414	0.118329	113.696	2.41499	0.0800011	300.684	5.674	0.250484	64.8762	1.27338	0.0709077	9804.9	117.166	0.160458	BelowLOD	23.6603	65.3928
R33 - 5.d	30	BelowLOD	405.69	955.727	4.24299	1.81904	3.1518	471340	7812.62	0.321553	BelowLOD	0.000658053	0.0194618	3.22302	0.220629	0.0693001	BelowLOD	0.0299552	0.177946	0.490482	0.28692	0.285676	1.69593	0.557738	0.547356	0.514046	0.156442	0.105705	11.6843	1.10018	0.115252	54.3913	1.77139	0.226074	112.759	2.68834	0.115022	257.271	5.12302	0.207344	51.5095	1.11176	0.0412538	10068.4	114.384	0.0697162	BelowLOD	24.3875	50.4128
R33 - 6.d	30	BelowLOD	362.756	1174.64	7.77555	2.61241	3.29372	477630	6878.89	0.920905	BelowLOD	0.0126002	0.0697323	4.95721	0.329232	0.047252	BelowLOD	0.407687	inf	2.37853	0.532428	0.225102	5.6223	0.943432	0.266429	1.28315	0.243418	0.0349543	33.9917	1.61555	0.439981	127.736	3.2799	0.192107	220.635	3.99093	0.171226	460.596	8.5453	0.274248	88.0063	1.11221	0.0457664	9343.85	97.0864	0.131729	BelowLOD	28.1227	45.8486
R33 - 7.d	30	BelowLOD	331.422	831.124	26.5308	4.86994	6.05432	475800	7877.59	0.599248	BelowLOD	0.00700846	0.0474975	4.04905	0.316191	0.0304872	BelowLOD	5.2475	inf	1.88143	0.511139	0.14121	5.82658	0.923854	0.224458	0.925233	0.181982	0.0998978	29.1453	2.14303	0.474217	106.692	2.61712	0.192247	181.518	3.3231	0.198912	347.332	5.40008	0.221303	66.9745	1.21525	0.0342422	8661.56	117.437	0.226991	BelowLOD	20.6181	54.0797
R33 - 8.d	30	BelowLOD	318.467	936.581	8.28416	1.61208	2.90968	472127	8255.58	0.624904	BelowLOD	0	0.0413655	4.22182	0.293396	0.0536932	BelowLOD	0.0214618	inf	1.23601	0.567514	0.761265	1.43899	0.524709	0.362438	0.328171	0.110058	0.0627171	10.0771	1.14888	0.150288	56.3266	1.92078	0.166379	109.491	2.10273	0.173787	253.617	5.60947	0.164397	52.7938	1.01695	0.0430001	9165.64	110.749	0.18579	BelowLOD	14.718	28.7702
R33 - 9.d	30	BelowLOD	287.74	958.531	3.22363	1.82885	3.04921	468638	6339.14	0.640691	BelowLOD	0.011526	0.0508758	3.76758	0.238951	0.0639565	BelowLOD	0.00509479	inf	BelowLOD	1.56271	2.45217	0.938782	0.427849	0.623943	0.261033	0.0992417	0.084825	6.36706	0.755007	0.265016	36.0051	1.64759	0.196166	81.6944	1.81239	0.112916	200.025	4.38944	0.31825	43.2423	0.830185	0.0555608	10320	123.692	0.172136	BelowLOD	59.7509	170.245
R33 - 10.d	30	BelowLOD	420.019	901.072	8.64518	2.80124	4.04274	468148	8918.24	0.428728	BelowLOD	0.000126661	0.0804872	4.9635	0.342453	0.0442502	BelowLOD	0.120291	inf	9.75274	2.3793	0.590818	6.16915	0.88461	0.308931	0.999976	0.197925	0.0980274	32.7997	2.01627	0.337846	130.75	3.26798	0.190194	228.809	3.28085	0.0882101	420.013	6.09713	0.192867	82.9206	1.40757	0.049727	8895.23	112.994	0.198429	BelowLOD	61.6298	281.12
R33 - 11.d	30	BelowLOD	307.22	699.871	17.9879	3.08925	4.74052	471825	7200.9	0.579652	0.0897771	0.0443261	0.0502006	12.6433	0.644127	0.0308051	BelowLOD	0.244828	inf	11.4308	1.56024	0.330687	19.1199	1.89515	0.445676	3.69803	0.364329	0.133412	110.349	4.94754	0.162827	406.447	16.463	0.372934	615.173	24.44	0.138161	1099.05	43.6232	0.218863	201.705	8.17047	0.0629435	7837.42	91.345	0.117125	BelowLOD	30.045	107.73
R33 - 12.d	30	BelowLOD	302.392	817.235	7.29754	1.72446	2.779	474473	8354.92	0.593208	BelowLOD	0.00801065	0.00833172	4.43071	0.360534	0.0485212	BelowLOD	0.0615568	inf	0.513977	0.290675	0.194171	1.70475	0.53744	0.0788298	0.589108	0.134365	0.0808698	14.9659	1.84347	0.174952	77.8277	6.38493	0.202564	144.879	9.82433	0.0956338	331.189	17.6585	0.377275	64.2298	3.02924	0.0156643	10247.1	84.6792	0.245721	BelowLOD	67.7068	inf
R33 - 13.d	30	BelowLOD	327.106	930.009	BelowLOD	1.24648	2.60403	472573	9690.97	0.504243	BelowLOD	0.00139332	0.0593011	4.55933	0.385237	0.0759629	BelowLOD	0.0152723	0.0086602	BelowLOD	0.220403	0.455994	1.54902	0.529433	0.375136	0.517916	0.152785	0.0864745	10.3792	1.06931	0.27839	55.8998	2.1861	0.104965	120.916	3.45869	0.127561	300.894	7.65814	0.195471	64.6104	1.47186	0.0517975	11235.1	103.177	0.165772	BelowLOD	165.361	505.661
R33 - 14.d	30	BelowLOD	252.481	762.012	6.96246	1.9292	4.33291	471537	10375.8	0.520133	BelowLOD	0.0148409	0.044406	6.10701	0.326415	0.0523962	BelowLOD	0.0409688	inf	5.16246	0.834729	0.123011	7.74908	1.15466	0.298338	1.81549	0.283163	0.0964586	36.3389	1.81758	0.330033	172.042	3.88564	0.252465	315.167	4.38487	0.127571	658.273	10.0713	0.295816	130.959	1.7803	0.0335221	8947.15	116.941	0.098787	BelowLOD	27.9779	100.247
R33 - 15.d	30	BelowLOD	287.23	790.526	9.36126	3.22554	4.32811	471940	9407.54	0.200429	BelowLOD	0.00100529	0.0439513	4.25423	0.327753	0.0574857	0.361664	0.252722	0.134009	1.0266	0.457006	0.431114	3.87134	0.758609	0.591657	0.880516	0.208591	0.169186	23.4522	1.40914	0.238195	98.3832	2.4385	0.0817666	168.247	3.11302	0.0779953	363.235	6.78784	0.222352	70.7218	1.35257	0.034989	9697.81	128.312	0.0983737	429.092	218.923	237.978
R33 - 16.d	30	BelowLOD	266.511	804.415	10.2281	3.01362	4.53692	475513	8205.75	3.48797	BelowLOD	0.0190236	0.0755229	6.67089	0.436251	0.0503638	0.677689	0.247041	0.580173	7.20427	1.28605	0.605497	9.01146	1.02186	0.458196	1.30607	0.208838	0.132581	50.9193	2.37938	0.444019	199.634	6.95787	0.27906	359.476	10.4312	0.0451503	731.497	17.6119	0.150975	142.861	2.64787	0.0804388	8548.28	136.88	0.0787325	BelowLOD	30.1573	71.4925
R33 - 17.d	30	BelowLOD	237.675	895.952	17.634	6.17679	10.8638	480096	8161.56	0.946909	BelowLOD	0.0272314	0.0437815	6.81964	0.390925	0.0539171	BelowLOD	0.0973045	inf	5.30735	0.900085	0.0631075	9.13288	1.13379	0.374085	1.92041	0.30246	0.0756836	48.2411	2.73445	0.257853	212.138	8.38959	0.248549	386.294	11.2996	0.134866	729.813	21.1039	0.302994	142.689	4.29593	0.0221961	8443.51	128.513	0.176528	BelowLOD	26.0107	75.8351
R33 - 18.d	30	BelowLOD	284.362	785.314	38.3653	9.36768	22.7975	470190	8059.5	0.365281	BelowLOD	0.0248279	0.040769	12.1596	0.587978	0.0649546	BelowLOD	24.2304	inf	7.82219	0.936906	0.481164	16.5794	1.85333	0.55365	3.4573	0.439778	0.116149	85.793	4.71399	0.406317	364.122	13.5967	0.184054	625.344	19.1454	0.123099	1123.51	35.7918	0.298401	215.596	5.64311	0.0418609	8118.8	105.34	0.272177	BelowLOD	21.8186	72.9803
Z_MudTank
mud - 1.d	30	BelowLOD	347.889	1022.9	13.3391	4.12667	5.81733	465201	7604.21	0.631372	BelowLOD	0.0195868	0.0396162	0.614011	0.109261	0.0466077	BelowLOD	0.0331226	inf	BelowLOD	0.827656	1.71517	0.195695	0.26075	0.104182	0.602121	0.172417	0.108396	2.23613	0.51441	0.290793	6.37923	0.658675	0.20461	6.6803	0.434907	0.133434	7.9172	0.805457	0.262862	1.27211	0.122955	0.049488	10187.1	84.0402	0.174627	BelowLOD	28.9118	54.5312
mud - 2.d	30	BelowLOD	403.178	861.389	6.88034	2.43273	4.58333	470196	9249.1	0.480991	BelowLOD	0.0113536	0.0345613	0.532597	0.0930174	0.0850388	BelowLOD	0.0502022	inf	1.03683	0.528056	0.691567	0.774199	0.36631	0.0667201	0.339057	0.110427	0.157906	1.75715	0.425806	0.314123	6.23092	0.559347	0.317114	6.34539	0.569582	0.0965821	7.80728	0.808555	0.158387	1.44514	0.170847	0.0401869	10054.4	94.9457	0.0832961	BelowLOD	18.1608	51.9727
mud - 3.d	30	BelowLOD	318.724	845.918	4.52027	1.68564	2.55795	470212	7782.68	0.350226	BelowLOD	0.0131674	0.0299919	0.549998	0.115147	0.0203998	BelowLOD	0.0889114	0.0756044	0.720828	0.355687	0.495603	0.41651	0.277027	0.174263	0.528641	0.157801	0.146722	2.84089	0.546529	0.302109	6.28552	0.607034	0.0801671	5.90342	0.515221	0.0773824	8.51815	0.68324	0.222975	1.45754	0.168615	0.0387108	10092.2	91.2891	0.155735	BelowLOD	8.47699	15.1972
mud - 4.d	30	BelowLOD	310.616	986.357	4.38506	1.4942	2.84144	467268	7713.37	0.586798	BelowLOD	0.000232028	0.0906431	0.54946	0.113286	0.0298739	BelowLOD	1.78759	inf	BelowLOD	0.249943	0.25456	0.345167	0.283622	0.281941	0.30261	0.122529	0.113158	2.89862	0.578651	0.119856	5.97252	0.737602	0.227369	5.52058	0.497673	0.0197446	7.04649	0.768432	0.118372	1.16662	0.13909	0.0462176	10203.8	115.844	0.158569	BelowLOD	28.8837	49.3611
mud - 5.d	30	BelowLOD	393.82	788.499	4.60302	1.76635	3.89931	470451	11074.4	0.32254	BelowLOD	0.0127477	0.0468917	0.526796	0.109034	0.0650792	BelowLOD	0.0299793	0.689894	0.979128	0.407992	0.416989	BelowLOD	0.270421	0.409427	0.375024	0.119168	0.135413	3.25092	0.681519	0.44486	6.09386	0.67128	0.12969	6.02561	0.585637	0.126005	8.8073	0.838445	0.241054	1.35449	0.128791	0.076495	10229.1	101.785	0.1104	BelowLOD	17.8175	49.4664
mud - 6.d	30	BelowLOD	379.219	908.053	7.31872	2.48617	4.39559	473467	7463.08	0.581522	BelowLOD	0.00169947	0.0266725	0.639339	0.140157	0.0562184	BelowLOD	0.136055	inf	BelowLOD	0.149151	0.323029	0.973156	0.393537	0.225528	0.525336	0.150986	0.128538	2.24751	0.503849	0.198363	7.37357	0.831479	0.216364	7.68932	0.568002	0.111899	8.909	0.984215	0.158446	1.52785	0.157711	0.0339761	9862.05	124.356	0.154926	BelowLOD	25.3381	53.5309
mud - 7.d	30	BelowLOD	399.349	940.674	8.87198	3.08285	4.49606	475232	7209.95	0.790694	BelowLOD	0.00807416	0.0582132	0.526963	0.124965	0.0692961	BelowLOD	1.65255	inf	BelowLOD	0.0975866	0.289453	0.835896	0.376659	0.516689	0.38031	0.139894	0.164321	2.40189	0.622591	0.289572	6.21707	0.609979	0.238745	6.02204	0.579414	0.1954	8.18992	0.730968	0.260986	1.23612	0.14099	0.0270997	10389.7	110.034	0.132659	BelowLOD	18.6721	50.669
mud - 8.d	30	BelowLOD	304.806	623.364	4.45736	1.57315	2.97837	477270	6864.98	0.692745	BelowLOD	0.00202399	0.00876658	0.495177	0.0898064	0.0291879	BelowLOD	0.00126726	inf	BelowLOD	0.294035	0.540552	0.727272	0.353841	0.365148	0.412443	0.140606	0.0531615	2.22155	0.499418	0.150337	6.09285	0.626458	0.1821	5.40532	0.508567	0.0842955	7.11203	0.632334	0.269115	1.19699	0.133069	0.039614	10367.2	81.9665	0.180911	BelowLOD	12.1493	33.2699
mud - 9.d	30	BelowLOD	279.077	771.548	4.08801	1.55187	3.80228	473861	7509.97	0.496596	BelowLOD	0.000555638	0.0959756	0.49102	0.112286	0.049183	BelowLOD	0.0131234	inf	2.41668	1.77118	2.07865	0.92674	0.440246	0.299567	0.438121	0.122804	0.0994549	2.4784	0.463523	0.270699	6.56011	0.583956	0.125819	5.4546	0.525318	0.0897831	7.97272	0.80747	0.100989	1.32393	0.121609	0.026122	10362.8	98.9792	0.16384	141.432	55.287	138.773
mud - 10.d	30	BelowLOD	416.217	676.685	10.1529	2.36695	5.9702	474330	7812.7	0.644239	BelowLOD	0.000874254	0.0183272	0.527954	0.136687	0.0496075	BelowLOD	0.121117	inf	BelowLOD	1.05419	1.32837	BelowLOD	0.230671	0.288362	0.381174	0.118309	0.0468937	2.63498	0.569208	0.237396	6.35432	0.692922	0.192549	6.65941	0.575852	0.163925	8.08314	0.545557	0.211586	1.32123	0.144808	0.0341334	10453.7	92.502	0.180282	BelowLOD	82.543	378.189
mud - 11.d	30	BelowLOD	390.314	768.472	7.2208	3.17959	6.39403	478388	7897.16	0.423517	BelowLOD	0.0097284	0.0257676	0.567848	0.106764	0.0535091	BelowLOD	0.0589125	inf	0.605486	0.350323	0.450254	1.0171	0.433132	0.748559	0.483111	0.140448	0.155498	2.36427	0.482294	0.387113	7.17253	0.647047	0.285002	5.53825	0.456989	0.148526	8.48279	0.824103	0.393977	1.27354	0.13956	0.0580979	10208.7	119.635	0.243105	BelowLOD	33.8017	99.985
mud - 12.d	30	BelowLOD	311.195	767.309	4.84242	2.02878	3.04568	471375	8893	0.590484	BelowLOD	0.000520185	0.0178571	0.60666	0.105059	0.0306498	BelowLOD	0.0279616	inf	BelowLOD	0.173036	0.40263	BelowLOD	0.248508	0.650008	0.458432	0.136811	0.0808553	2.44702	0.556429	0.175764	6.71176	0.569398	0.107843	6.06041	0.499509	0.132573	8.58144	0.810129	0.173505	1.3001	0.125951	0.074824	10251.9	85.4278	0.192266	BelowLOD	77.7372	inf
mud - 13.d	30	BelowLOD	340.871	823.56	4.17465	1.171	2.72671	477056	7004.36	0.686972	BelowLOD	0.0106748	0.0843239	0.58444	0.125242	0.0902636	BelowLOD	0.0144004	0.0186551	0.445399	0.252384	0.394906	0.704162	0.335947	0.220671	0.46905	0.162041	0.107079	2.86101	0.568194	0.328278	7.24644	0.684348	0.230327	6.11138	0.575224	0.121088	8.3396	0.75752	0.177676	1.28011	0.143926	0.0498027	10324.4	126.756	0.31277	BelowLOD	249.241	790.523
mud - 14.d	30	BelowLOD	326.252	698.197	7.3557	2.32921	3.79658	479607	9959.02	0.694594	BelowLOD	0.0123	0.0941706	0.61912	0.131234	0.0864446	BelowLOD	0.0144746	inf	0.439492	0.303086	0.428378	BelowLOD	0.256253	0.375963	0.675356	0.192042	0.0613315	2.84469	0.537529	0.288157	6.57724	0.603734	0.135901	5.73394	0.520278	0.104792	7.94897	0.868997	0.0961926	1.40076	0.139235	0.0499685	10441.6	86.7455	0.123645	BelowLOD	34.2995	77.8031
mud - 15.d	30	BelowLOD	232.911	724.279	8.02483	3.31745	4.17361	468326	8578.06	0.764471	BelowLOD	0.00962074	0.0682731	0.65585	0.128348	0.0202389	BelowLOD	0.287739	0.196995	0.596736	0.36344	0.319209	0.420838	0.306623	0.396141	0.465445	0.136489	0.127467	2.46158	0.508733	0.302265	7.01457	0.71522	0.287892	6.37604	0.558561	0.163165	7.73721	0.698264	0.201197	1.2247	0.156931	0.0491602	10394.6	90.2846	0.171299	399.467	296.396	196.34
mud - 16.d	30	BelowLOD	289.348	734.132	8.17778	2.58064	5.49013	478835	10148.5	0.669373	BelowLOD	0.000145071	0.0260691	0.644577	0.121875	0.0940004	BelowLOD	0.0653586	0.110836	0.895553	0.39329	0.481436	BelowLOD	0.330951	0.907908	0.381516	0.143339	0.167711	3.26564	0.707932	0.0613954	6.22872	0.812305	0.206007	5.47444	0.470252	0.100841	7.22775	0.930654	0.182881	1.43978	0.155203	0.0766108	10449.5	111.883	0.056834	BelowLOD	33.1588	58.3067
mud - 17.d	30	BelowLOD	323.088	766.372	15.6403	4.97711	12.237	484452	7769.4	0.805047	BelowLOD	0.00111907	0.0413958	0.575483	0.134744	0.0451392	BelowLOD	0.015372	inf	BelowLOD	0.2578	0.40836	BelowLOD	0.256857	0.461618	0.502695	0.135003	0.0911521	3.17757	0.755362	0.527515	6.26714	0.840639	0.0888433	6.19404	0.616064	0.113552	7.55493	0.690344	0.328394	1.31714	0.138162	0.0540966	10180.1	139.254	0.172111	BelowLOD	26.3559	74.3011
mud - 18.d	30	BelowLOD	343.48	490.135	18.354	5.90284	16.625	483808	7467.34	0.621063	BelowLOD	0.00182178	0.0304757	0.560188	0.0975377	0.0534213	BelowLOD	0.0786672	inf	BelowLOD	0.167118	0.306461	BelowLOD	0.234436	0.366324	0.494162	0.154384	0.138704	2.82874	0.648893	0.112425	6.26263	0.666572	0.254822	6.64417	0.494303	0.133336	8.52342	0.775862	0.312172	1.44711	0.157278	0.0529301	10142	105.491	0.274152	BelowLOD	25.9265	66.0309
RUN 2
SAMPLE ID	Duration (s)	Ca43_ppm_mean	Ca43_ppm_2SE(int)	Ca43_ppm_LOD_Howell	Ti49_ppm_mean	Ti49_ppm_2SE(int)	Ti49_ppm_LOD_Howell	Zr91_ppm_mean	Zr91_ppm_2SE(int)	Zr91_ppm_LOD_Howell	La139_ppm_mean	La139_ppm_2SE(int)	La139_ppm_LOD_Howell	Ce140_ppm_mean	Ce140_ppm_2SE(int)	Ce140_ppm_LOD_Howell	Pr141_ppm_mean	Pr141_ppm_2SE(int)	Pr141_ppm_LOD_Howell	Nd146_ppm_mean	Nd146_ppm_2SE(int)	Nd146_ppm_LOD_Howell	Sm147_ppm_mean	Sm147_ppm_2SE(int)	Sm147_ppm_LOD_Howell	Eu153_ppm_mean	Eu153_ppm_2SE(int)	Eu153_ppm_LOD_Howell	Gd157_ppm_mean	Gd157_ppm_2SE(int)	Gd157_ppm_LOD_Howell	Dy163_ppm_mean	Dy163_ppm_2SE(int)	Dy163_ppm_LOD_Howell	Er166_ppm_mean	Er166_ppm_2SE(int)	Er166_ppm_LOD_Howell	Yb172_ppm_mean	Yb172_ppm_2SE(int)	Yb172_ppm_LOD_Howell	Lu175_ppm_mean	Lu175_ppm_2SE(int)	Lu175_ppm_LOD_Howell	Hf178_ppm_mean	Hf178_ppm_2SE(int)	Hf178_ppm_LOD_Howell	Pb204_ppm_mean	Pb204_ppm_2SE(int)	Pb204_ppm_LOD_Howell
009
009 - 1.d	30	BelowLOD	322.96	729.29	3.50386	1.5027	3.20688	464569	9035.65	0.608286	0.750461	0.227033	0.0395374	8.59414	1.84499	0.0592323	BelowLOD	2.25415	inf	12.4703	3.31803	0.85163	8.10225	2.32529	0.401385	1.06933	0.31176	0.0664372	21.5742	3.05014	0.497506	81.6277	4.65472	0.192189	123.611	10.0095	0.133765	267.8	30.3996	0.152727	54.2685	6.97713	0.0419628	13751.8	436.721	0.112851	675.727	82.3288	39.7687
009 - 2.d	30	BelowLOD	268.312	719.253	4.1741	1.83847	2.53162	467773	8523.06	0.665852	BelowLOD	0.0161531	0.0483808	0.773638	0.151317	0.0476906	BelowLOD	0.0853658	inf	0.45078	0.393393	0.209453	2.64146	0.610171	0.0627872	0.243738	0.0863048	0.103505	25.1078	1.6629	0.320731	147.044	5.32625	0.189185	253.62	8.63543	0.100006	488.181	20.2995	0.150369	93.0358	3.54454	0.0612914	12499.6	86.7272	0.102216	511.364	54.917	45.0836
009 - 3.d	30	BelowLOD	275.086	725.324	8.75482	2.09617	2.50252	464848	7848.08	0.274532	0.0647674	0.0409484	0.0408552	9.58949	0.521456	0.0486858	BelowLOD	0.312805	inf	12.725	1.76616	0.52089	16.2162	1.6391	0.387222	1.82386	0.279433	0.0962629	68.6739	3.52186	0.130561	232.74	8.11757	0.055018	373.631	8.25723	0.169985	688.392	13.2851	0.153449	131.971	1.9798	0.0450789	11773	138.32	0.159584	587.697	50.9034	44.5448
009 - 4.d	30	BelowLOD	326.783	724.633	6.16992	2.23811	2.37137	475483	9149.06	1.17474	0.21806	0.0790167	0.0178486	2.98365	0.362179	0.021241	BelowLOD	0.191632	inf	4.48452	1.02264	0.605328	6.31526	1.17424	0.462904	0.21348	0.113108	0.101105	36.2459	3.00595	0.274253	148.18	8.96515	0.157915	256.448	18.9968	0.0807263	542.443	40.964	0.161285	108.243	7.19533	0.0150888	11752.4	135.366	0.118925	487.923	62.039	57.104
009 - 5.d	30	BelowLOD	351.883	770.125	14.5367	3.42203	2.55346	466895	11307.1	0.126881	2.53659	0.649377	0.0603543	6.66083	1.19017	0.035873	BelowLOD	0.266782	inf	3.71033	1.1143	1.16989	4.91799	1.1595	0.352703	BelowLOD	0.0767707	0.147583	46.4188	3.49913	0.261716	273.038	18.6372	0.167898	495.968	36.0077	0.244178	1123.78	95.5631	0.258546	224.728	19.3561	0.0583566	11727.2	150.401	0.263591	573.073	76.658	50.377
009 - 6.d	15.069	BelowLOD	431.238	1062.75	23.4642	4.75094	2.9678	485624	10294.9	0.272741	3.40675	0.64517	0.0869956	39.6102	7.35304	0.123165	BelowLOD	1.52341	inf	57.0607	11.977	0.86115	33.7445	3.61647	0.758729	6.07071	1.03433	0.145768	101.106	7.63375	0.452407	352.829	15.6169	0.103669	472.949	12.017	0.206849	823.885	17.7129	0.166476	154.039	3.06633	0.0376149	10967.4	195.732	0.297806	528.302	104.103	70.7225
009 - 7.d	30	BelowLOD	316.99	682.04	5.60962	1.7366	2.9111	466154	8165.32	0.500091	0.569016	0.114731	0.0373111	10.5949	0.904635	0.0662037	BelowLOD	0.242591	inf	9.33677	1.59897	0.441822	8.47125	1.68343	0.56572	1.42272	0.310601	0.104671	35.3676	2.44451	0.286039	180.566	7.0214	0.106358	329.375	11.6101	0.166903	774.428	36.6919	0.164163	158.878	7.32602	0.0788868	11674.3	114.63	0.167302	298.8	30.6102	31.5441
009 - 8.d	8.26127	1723.77	1136.13	1233.81	21.3577	4.74107	4.77529	496164	13422.9	0.802123	31.9066	2.40452	0.146589	311.257	9.22684	0.147016	BelowLOD	2.37659	inf	549.802	27.3624	0.850275	274.93	14.1092	0.624188	53.5294	3.85275	0.144554	382.282	18.5457	0.620299	835.247	44.7682	0.124194	872.911	19.1034	0.089703	1850.3	62.3529	0.24833	359.544	9.69008	0.114182	14241.4	281.344	0.23369	925.99	148.922	55.6954
009 - 9.d	30	BelowLOD	285.843	600.217	7.58394	2.98235	2.36853	464453	6766.36	0.963536	BelowLOD	0.00151119	0.0580705	21.172	0.923356	0.0650683	BelowLOD	0.0514909	inf	4.3349	0.75349	0.463199	6.08684	1.00293	0.176111	BelowLOD	0.0487215	0.0722101	21.1762	2.05177	0.391622	68.9554	2.69189	0.141959	90.7598	1.64922	0.1436	152.201	3.82934	0.179186	31.8368	1.05563	0.0466568	10726.7	138.502	0.178329	293.272	31.4398	36.5083
009 - 10.d	30	BelowLOD	381.266	1027.27	6.24986	2.38624	2.83084	479427	8429.27	0.824551	1.25799	0.226795	0.049067	17.7992	1.57174	0.0544845	BelowLOD	0.37743	inf	29.725	3.03029	0.402966	8.75951	1.36828	0.366694	1.04934	0.234237	0.0934677	32.2916	2.25068	0.332892	174.428	4.91465	0.264318	295.169	8.67197	0.201963	610.302	18.5291	0.355602	121.313	3.57218	0.0543134	11996.7	220.457	0.348742	503.142	62.1277	42.1624
009 - 11.d	30	BelowLOD	361.386	768.227	6.09262	1.88754	2.16104	471094	8622.72	0.386441	BelowLOD	0.0103801	0.0655096	13.061	0.705527	0.087474	BelowLOD	0.0208581	inf	1.54262	0.447615	0.463873	2.01936	0.662216	0.374293	0.632298	0.132143	0.0863738	7.84863	0.988211	0.243007	22.9519	1.31782	0.12285	33.4199	1.59352	0.123575	64.1817	2.43516	0.155129	14.6382	0.445668	0.0594238	10502.2	137.141	0.171722	425.733	47.7539	47.2877
009 - 12.d	30	BelowLOD	586.764	1436.57	4.85782	2.47175	3.10019	461100	7858.5	0.803718	0.271258	0.185695	0.0600958	2.26576	0.851681	0.0907193	BelowLOD	0.107908	inf	1.03179	0.715553	0.640872	3.96776	1.18914	0.566016	BelowLOD	0.0852864	0.21651	27.4987	2.59287	0.451963	143.387	4.65013	0.0800322	232.163	4.4203	0.230183	462.451	8.01429	0.399691	90.5654	2.31376	0.0766162	11503.3	203.338	0.187922	573.925	76.4172	44.9575
009 - 13.d	30	BelowLOD	238.79	556.746	7.94078	2.65696	2.31751	457863	7421.08	0.714293	0.157382	0.08062	0.0591129	2.73283	0.347951	0.0394724	BelowLOD	0.0661726	inf	6.8262	1.5235	0.467153	8.56363	1.20488	0.667646	0.318375	0.129443	0.10239	46.2133	2.69641	0.249983	193.725	6.18589	0.208554	293.802	11.475	0.160599	539.497	23.555	0.307457	103.599	4.25909	0.0639744	12324.5	104.126	0.162093	295.423	31.2545	26.7547
009 - 14.d	30	BelowLOD	300.285	595.005	3.02716	1.44311	2.60498	467398	8529.96	0.579869	4.68854	0.375081	0.0504135	31.4106	1.74841	0.0497063	BelowLOD	0.211588	inf	31.8937	3.25935	0.367226	12.4442	1.83473	0.37175	2.41329	0.32303	0.0878803	35.3776	2.7826	0.275862	167.023	4.80725	0.161791	286.717	6.99073	0.117208	601.455	15.6212	0.157273	118.529	2.81317	0.056367	12669.9	95.8156	0.139282	346.746	33.3438	35.8351
009 - 15.d	30	BelowLOD	676.193	1772.62	BelowLOD	3.06576	5.83452	460344	11002	1.68855	0.102243	0.0893487	0.0703392	12.4862	0.872912	0.161878	BelowLOD	0.0268676	inf	2.92517	1.58666	0.441747	2.52562	0.914574	0.788954	0.596182	0.24967	0.152282	18.2142	2.45155	0.946745	80.9086	4.12788	0.358715	152.52	5.47164	0.203192	312.26	10.349	0.135121	66.4712	1.87465	0.0987811	10193.6	86.4856	0.295607	649.298	98.4419	64.8602
009 - 16.d	30	BelowLOD	272.091	601.564	189.525	35.6314	2.47033	472073	7756.65	0.860532	0.116179	0.0597574	0.0728579	12.0777	0.648551	0.0512457	BelowLOD	0.0597202	inf	5.8781	1.08888	0.249427	6.08208	1.03053	0.484519	0.604437	0.156094	0.103251	29.6663	2.73808	0.205454	150.379	8.73568	0.120327	283.236	12.7232	0.130302	573.273	21.1539	0.20166	116.583	3.88148	0.0243817	11117	111.305	0.0794109	241.373	27.9949	30.2753
009 - 17.d	30	BelowLOD	497.296	1071.64	39.5216	9.77701	2.66406	467622	9158.65	0.754894	7.55848	2.05994	0.0426059	22.1397	4.06899	0.091864	BelowLOD	0.398363	inf	16.8214	4.79654	0.540497	5.45027	1.07502	0.804211	0.262496	0.129855	0.0815399	33.6804	2.22592	0.449478	191.468	7.42415	0.263059	388.477	13.3467	0.151263	970.948	43.4362	0.266887	200.364	8.43532	0.0552406	13473.1	276.721	0.180164	417.836	65.9036	38.4756
009 - 18.d	30	BelowLOD	282.333	539.828	13.4189	2.19509	2.53894	477753	7435.2	2.01046	0.129804	0.0465656	0.0971173	19.0555	0.828873	0.0272441	BelowLOD	0.0615457	inf	9.00731	1.62411	0.571438	7.49721	1.01205	0.507337	1.97516	0.313285	0.0695358	26.3327	2.00209	0.234738	80.0486	2.50368	0.197209	113.543	3.14587	0.077094	212.134	5.47178	0.148646	42.8659	1.0792	0.049356	9167.73	151.223	0.197445	278.05	35.3484	30.1397
009 - 19.d	30	BelowLOD	349.468	670.835	32.524	3.43997	2.64203	474291	7941.02	0.38831	BelowLOD	0.0118512	0.0577601	2.50191	0.230755	0.0467304	BelowLOD	0.0672524	inf	10.2372	1.56634	0.543518	12.1307	1.61082	0.271735	0.241132	0.0998647	0.048881	64.0228	4.85991	0.234427	236.077	11.7551	0.145084	377.978	15.7883	0.134932	647.474	22.7979	0.136487	127.333	3.96296	0.0413606	10299.1	140.06	0.12855	270.521	33.5361	29.891
009 - 20.d	30	1229.27	433.523	748.177	27.3603	5.06994	3.09631	462306	9252.98	0.544876	14.3446	2.22207	0.0275536	122.108	17.1243	0.0229055	BelowLOD	2.45268	inf	252.009	32.1425	0.237493	134.196	16.4193	0.406014	34.5969	3.91345	0.0476439	217.233	26.3361	0.356742	552.873	62.4381	0.171591	493.104	50.0014	0.164207	857.487	86.9703	0.406759	154.015	14.9298	0.0331521	12065.3	224.989	0.108635	439.65	35.1186	37.4744
009 - 21.d	30	BelowLOD	317.546	789.447	6.93112	1.98529	2.17242	473036	8230.49	0.611133	0.12269	0.0564166	0.0400238	8.85743	0.525405	0.0288712	BelowLOD	0.0519786	inf	5.27635	1.21397	0.578218	5.60863	1.12033	0.289969	0.804166	0.185651	0.0306321	34.4032	2.68934	0.385109	152.028	5.04909	0.174452	288.348	6.90471	0.120763	578.228	11.9382	0.270757	118.745	2.0639	0.0253414	10104	110.713	0.295879	343.039	34.2052	32.8152
009 - 22.d	30	BelowLOD	850.966	1952.96	20.1519	4.94375	4.5211	475322	11630.9	2.62188	0.925105	0.246384	0.0808222	12.5308	1.47833	0.117908	BelowLOD	0.219062	inf	9.05918	2.52602	1.92008	7.77007	1.99892	0.699694	1.19093	0.429403	0.0679606	28.5243	2.82425	0.66407	140.001	6.59311	0.486669	286.136	6.72908	0.328221	644.03	18.3342	0.656649	131.144	4.78778	0.119478	11079.7	111.359	0.432058	897.377	159.886	58.7102
009 - 23.d	30	BelowLOD	307.493	715.133	32.8955	4.29155	2.73932	478803	8467.45	0.45483	0.285136	0.0760835	0.0526037	7.9362	0.475579	0.044762	BelowLOD	0.113809	inf	8.63488	1.54696	0.566199	9.03705	1.10922	0.309363	0.932113	0.223193	0.102612	33.9646	1.87321	0.340404	198.473	4.95731	0.229703	403.609	8.51626	0.0562249	791.93	17.4598	0.19752	155.425	3.41136	0.055314	12391.2	117.704	0.194949	334.13	37.62	36.0731
009 - 24.d	21.7387	BelowLOD	296.55	742.067	6.83049	2.42102	2.70404	471791	7194.72	0.59892	0.0730462	0.0525126	0.049532	1.51181	0.219671	0.0492356	BelowLOD	0.0458951	inf	0.799409	0.486047	0.638974	2.33488	0.603348	0.252844	BelowLOD	0.0783163	0.106661	24.4923	1.54637	0.348969	208.018	7.25972	0.0788424	505.777	18.3189	0.0789769	1302.51	45.9753	0.156426	274.73	10.0544	0.0381469	14060.6	145.99	0.113651	288.245	37.9069	28.2894
009 - 25.d	30	BelowLOD	290.677	535.503	7.38897	1.9877	2.80319	462434	7962.59	0.467512	4.84454	1.29605	0.0337763	29.1945	7.44418	0.0439327	BelowLOD	1.29369	inf	60.4991	16.1279	0.249274	35.6014	9.0344	0.28054	6.8614	1.81882	0.0294759	78.8683	15.5249	0.372589	227.974	33.3649	0.175032	291.387	28.6921	0.159659	550.426	43.0919	0.331752	105.936	6.90607	0.07258	12814.3	100.383	0.114181	357.899	28.2287	20.2155
009 - 26.d	30	BelowLOD	291.87	594.353	3.15167	1.45321	2.32869	464607	8285.29	0.574424	0.203179	0.0727538	0.0167056	1.75859	0.243844	0.0772344	BelowLOD	0.0675918	inf	2.27787	0.713545	0.425071	3.72262	0.844729	0.124409	0.466485	0.121093	0.173774	20.7389	1.81421	0.36661	93.9955	2.80698	0.178141	134.505	2.7951	0.108567	239.765	5.74322	0.302252	46.3205	0.857482	0.031223	12650.3	93.978	0.168332	266.567	23.9249	25.4156
009 - 27.d	21.7387	BelowLOD	372.718	721.892	3.98618	2.00847	2.78667	470719	9974.84	1.1097	0.263149	0.101884	0.0593323	7.37215	0.627482	0.0738998	BelowLOD	0.0884136	inf	3.36075	0.98485	0.156145	3.97661	0.834091	0.424263	0.176091	0.0883274	0.0696103	31.2187	2.59004	0.222188	195.221	4.01891	0.116459	366.571	5.42421	0.13455	771.118	20.5623	0.129924	153.734	4.24702	0.0327305	13368	175.523	0.167702	303.072	36.8171	32.4364
009 - 28.d	30	BelowLOD	436.643	725.687	6.0685	1.91232	2.99556	469154	8869.84	0.721728	1.54882	0.242972	0.0452378	14.8367	1.23423	0.0838029	BelowLOD	0.309475	inf	17.2144	2.58321	0.584289	9.92835	1.48514	0.358865	1.38958	0.255554	0.110779	37.2623	2.78797	0.457163	137.465	5.71453	0.205804	229.789	6.93223	0.215474	426.637	12.5217	0.227203	84.8731	2.22523	0.0815291	11132.5	159.511	0.164499	275.159	37.5231	33.3093
009 - 29.d	30	2171.75	693.625	1349.02	58.5286	7.52524	4.3456	467271	10072.3	1.15788	13.5882	0.930104	0.0732589	114.964	5.41811	0.141771	BelowLOD	1.44742	inf	222.451	13.0337	0.356423	130.825	8.5188	0.94816	26.4948	1.78331	0.113508	243.2	13.1935	0.866529	680.312	28.5279	0.245379	738.257	22.8502	0.164982	1262.36	32.1552	0.305466	225.519	5.47923	0.0550553	11228.2	167.599	0.368323	557.539	62.0725	49.7395
009 - 30.d	17.0469	BelowLOD	643.617	801.669	6.88504	2.18462	2.89269	493277	10839.1	1.00447	9.63657	1.71107	0.0382584	60.6499	9.36202	0.0547424	BelowLOD	2.51337	inf	148.618	24.359	0.538772	89.2761	13.6701	0.467929	21.2785	2.86765	0.108331	170.16	18.3186	0.542189	468.849	39.7961	0.0957814	539.668	27.6046	0.177533	869.115	33.0913	0.351859	154.32	6.08863	0.0624881	12515.7	266.574	0.175306	318.37	46.4878	31.3269
095
095 - 1.d	30	BelowLOD	416.463	927.429	12.3324	5.34365	5.55692	455720	9097.69	0.793964	0.397569	0.11779	0.0802945	10.5668	0.576084	0.0344326	BelowLOD	2.82588	1.5003	3.91675	1.09949	0.465507	3.77709	0.82525	0.494833	0.83089	0.215738	0.135634	22.5123	1.76294	0.118826	101.577	3.9388	0.101055	175.586	5.05047	0.232929	350.386	6.66009	0.415621	77.0202	2.11117	0.0886417	10363.4	145.993	0.057529	82.8976	41.4262	75.2379
095 - 2.d	30	BelowLOD	299.821	568.524	13.0615	4.10388	4.40067	452444	9022.32	0.438233	BelowLOD	0.0327298	0.0595781	9.18701	0.435543	0.0258777	BelowLOD	1.23789	0.52049	1.19498	0.405539	0.434612	2.80892	0.808056	0.0613085	0.354596	0.11325	0.068946	16.116	1.45433	0.3536	72.3379	2.75864	0.185122	122.722	3.75701	0.177904	250.891	6.39787	0.0827763	52.5856	1.48496	0.0478305	11023.5	72.1333	0.123769	BelowLOD	27.981	47.2498
095 - 3.d	30	BelowLOD	281.228	553.462	68.2103	26.9599	6.02916	463951	11125.9	0.416157	0.151762	0.0893665	0.0549887	8.55153	0.613074	0.0571388	BelowLOD	2.52113	1.5557	1.95838	0.575761	0.449996	4.66805	0.957378	0.434713	0.49592	0.139986	0.108031	20.5508	1.44202	0.178217	81.4866	2.63294	0.173821	132.345	3.11173	0.0354842	266.499	5.75001	0.174494	56.2944	1.09252	0.0579774	9815.68	104.609	0.147725	BelowLOD	24.8803	60.692
095 - 4.d	30	BelowLOD	278.029	742.319	14.7994	4.35682	4.58702	452852	7621.13	0.251735	1.6519	0.270538	0.0573575	15.3703	1.18667	0.0405291	BelowLOD	8.66191	0.768311	6.38739	1.28792	0.389287	4.95884	0.846243	0.254197	0.719114	0.161818	0.086632	23.1959	1.39651	0.331722	88.9884	4.88113	0.245708	147.94	9.47582	0.0592593	308.223	22.0319	0.303763	66.5478	4.88994	0.0560661	9952.02	234.246	0.130967	110.404	28.6185	50.2619
095 - 5.d	30	BelowLOD	276.192	749.387	17.7614	4.39476	5.22794	476720	8766.72	0.664415	0.312102	0.0814871	0.0383452	8.97379	0.595026	0.051461	BelowLOD	4.32721	0.382771	5.07185	0.932182	0.674123	5.74495	1.01936	0.170528	0.640762	0.157918	0.0536239	24.5615	1.85234	0.333959	99.8928	2.46113	0.341678	159.463	3.08027	0.0926587	315.897	6.26014	0.133003	67.9094	0.991146	0.02691	10909.4	121.922	0.215558	81.2239	41.1176	60.0866
095 - 6.d	30	BelowLOD	311.38	629.753	17.8822	4.53085	5.18174	477833	8485.68	0.487359	0.472468	0.123309	0.0500365	7.96584	0.665074	0.0469209	BelowLOD	4.9963	0.786815	5.35091	0.908656	0.693927	6.1152	1.06882	0.278576	0.731283	0.159131	0.122297	27.8538	1.99439	0.223967	125.457	4.37917	0.192806	224.345	5.30931	0.062944	470.396	10.9868	0.277967	99.6182	2.00521	0.0471695	11269.8	121.534	0.171252	62.7152	33.7355	55.8209
095 - 7.d	30	BelowLOD	277.342	651.213	8.89034	3.90684	4.80313	457093	8152.28	0.82777	BelowLOD	0.0204512	0.0524367	4.88419	0.43787	0.00991365	0.705045	0.649558	0.420674	0.696141	0.361138	0.346595	3.45372	0.709784	0.723391	0.232691	0.113913	0.0769224	23.6375	1.36139	0.368018	121.712	3.24792	0.167041	226.963	4.77414	0.167416	488.708	8.24583	0.279491	103.339	1.51673	0.0138563	11750.5	121.226	0.193598	BelowLOD	33.3457	61.7016
095 - 8.d	30	983.94	427.122	697.632	47.4776	8.89192	4.58738	456760	8176.83	0.426599	1.38742	0.413562	0.0376613	9.73279	0.748739	0.0999611	BelowLOD	8.19816	0.749215	5.82795	1.19005	0.345183	6.56616	0.917598	0.522943	0.644448	0.182633	0.123435	31.6254	2.32683	0.554557	113.762	3.97807	0.135869	170.453	3.7162	0.0886365	329.333	7.031	0.167754	69.285	1.90709	0.0699617	10036.2	94.1151	0.161857	BelowLOD	34.6541	70.0173
095 - 9.d	30	BelowLOD	248.079	676.316	42.6674	8.67967	7.96725	462379	8293.92	0.581535	0.0617269	0.0374877	0.0400507	5.88433	0.331036	0.0820197	BelowLOD	11.0955	0.423736	2.52908	0.622656	0.416739	4.80779	0.832888	0.47427	0.564119	0.151982	0.0734205	31.6066	2.45349	0.196188	116.687	3.05399	0.20148	185.84	4.69944	0.140841	364.2	9.07968	0.244611	77.0044	2.15325	0.0132253	9960.37	112.71	0.160201	BelowLOD	41.2744	74.0395
095 - 10.d	30	BelowLOD	303.929	684.985	29.9881	7.35397	5.90754	466578	7308.57	0.598099	BelowLOD	0.000479076	0.0547539	5.8058	0.376479	0.0381655	20.4247	309.57	0.246549	2.09583	0.582812	0.49009	4.48536	0.846299	0.269015	0.420878	0.12444	0.0591587	27.7306	1.98602	0.413228	110.709	3.72518	0.213866	180.8	3.19975	0.143093	362.976	5.56677	0.217405	76.0965	1.50909	0.0323426	10205.8	158.18	0.140747	122.295	43.178	82.2083
095 - 11.d	30	BelowLOD	326.191	806.337	5698.1	911.962	5.75079	454427	7784.5	0.382771	0.0364259	0.0341027	0.0361906	9.67632	0.379056	0.00991494	16.4523	8.91145	0.480399	1.05856	0.45121	0.539838	3.82787	0.827827	0.42233	0.360783	0.101197	0.0743598	18.2781	1.42382	0.524689	74.2621	2.30429	0.0562681	114.313	2.15168	0.0885291	229.963	3.3077	0.0859661	47.502	1.15063	0.0518301	10012.4	115.869	0.137995	BelowLOD	54.0994	62.4954
095 - 12.d	30	BelowLOD	288.074	693.22	12.4839	6.23721	6.92297	461852	8004.23	0.556587	0.211973	0.0695738	0.0599794	5.90678	0.548887	0.094457	15.6705	6.87011	0.354949	3.68207	1.18525	0.410323	3.48868	0.690298	0.374858	0.508479	0.145688	0.045653	24.2062	2.00029	0.277539	106.078	3.95127	0.205352	168.382	4.67596	0.0777748	344.773	11.8003	0.200617	72.2011	2.23619	0.0346944	11311.6	102.806	0.0749277	139.388	64.6084	85.3288
095 - 13.d	30	BelowLOD	268.032	809.661	25.7169	5.64064	4.99219	459908	8392.77	0.18994	BelowLOD	0.000969012	0.0456346	5.6763	0.391258	0.0456186	BelowLOD	0.951241	0.283902	1.46114	0.454838	0.359366	4.83226	0.858812	0.203787	0.36485	0.110131	0.059021	25.8873	1.62294	0.242668	108.894	2.75664	0.207382	174.508	3.73129	0.0607082	352.026	9.11972	0.0836417	74.8622	1.53162	0.043987	10739	105.238	0.15279	102.837	56.2861	91.2232
095 - 14.d	30	BelowLOD	269.245	712.537	29.7754	7.27937	6.91925	459526	7677.81	0.841561	0.214946	0.0705648	0.0524179	5.98217	0.40329	0.0975049	8.94089	2.85362	0.387777	2.50689	0.72731	0.474816	3.61129	0.851293	0.383645	0.558124	0.137105	0.0904849	26.7346	1.69337	0.284056	105.168	3.3075	0.191398	185.841	3.54703	0.141742	391.58	9.15642	0.167039	82.676	1.84865	0.0589182	11101.9	137.407	0.15255	105.858	57.4135	84.737
095 - 15.d	30	BelowLOD	316.652	637.314	24.7979	5.57713	7.2521	455115	8634.32	0.493632	0.681275	0.156664	0.060731	11.4741	0.697134	0.0789721	21.5278	3.9728	0.354872	7.31436	1.32405	0.490673	5.83408	1.16327	0.318595	0.815582	0.19099	0.0985872	24.9163	2.13265	0.269621	91.0213	4.95855	0.16146	146.556	5.34369	0.129292	300.768	10.793	0.148373	62.1728	2.14738	0.0292967	10504.1	124.264	0.185708	BelowLOD	75.276	97.5849
095 - 16.d	30	BelowLOD	350.693	788.431	22.4808	5.76321	6.84672	463369	6906.21	0.908211	0.647143	0.127306	0.0522763	14.9303	0.5607	0.037316	10.6862	2.25634	0.354839	5.99841	1.00789	0.537045	6.67159	0.992994	0.118053	0.903791	0.172019	0.111776	30.6945	1.96212	0.0874113	113.059	3.38312	0.119328	170.638	3.67792	0.0598771	322.9	7.28086	0.130667	64.9643	1.59829	0.0680259	10310.7	130.678	0.126576	253.215	75.7322	92.38
095 - 17.d	30	BelowLOD	248.707	656.148	39.3618	7.87959	7.14987	456388	7500.33	0.660797	0.0823013	0.0484624	0.0663371	6.60211	0.415679	0.0753395	1.14115	0.741296	0.466199	1.49359	0.491565	0.525975	5.4727	0.923608	0.540252	0.244288	0.107411	0.0816958	26.7792	1.38146	0.477135	102.937	2.81128	0.242427	170.259	3.93155	0.125566	332.793	7.41373	0.188083	69.5458	1.72078	0.0399648	10738.5	91.0726	0.377011	BelowLOD	67.3413	100.058
095 - 18.d	30	BelowLOD	286.882	674.793	26.5049	6.84494	5.69452	458056	8797.67	0.630059	BelowLOD	0.0226782	0.0659074	6.77013	0.443763	0.0469254	1.49335	0.810328	0.423731	2.43127	0.548753	0.52344	5.31538	0.871783	0.430427	0.289478	0.113682	0.116085	26.1178	1.92439	0.32707	109.937	3.80812	0.18432	191.9	6.73447	0.06056	384.874	13.7776	0.208914	79.9396	2.81234	0.0404974	10891	141.378	0.179558	101.095	73.8516	78.6963
095 - 19.d	30	BelowLOD	227.585	683.981	21.9037	5.00609	5.75205	467585	6705.18	0.606301	BelowLOD	0.0291406	0.0641787	5.16266	0.320127	0.0587351	0.374804	0.423096	0.28807	1.43609	0.457298	0.716296	3.27408	0.755832	0.52592	0.298119	0.11139	0.0707925	20.6795	1.28811	0.262874	82.2899	2.26789	0.352912	136.972	2.96177	0.0504858	274.857	5.79602	0.164425	56.6249	1.31678	0.0503121	10398.4	108.729	0.0973314	BelowLOD	76.5811	106.854
095 - 20.d	30	BelowLOD	311.999	630.14	35.6687	8.4208	7.40645	475265	6402.16	0.629949	0.421753	0.114476	0.0698736	10.8187	0.647312	0.079235	5.19098	1.12801	0.36435	3.90539	0.772452	0.470856	5.88643	1.06707	0.268412	0.855443	0.19357	0.0855182	28.1043	2.07672	0.23107	95.1861	3.4052	0.180164	166.474	4.64447	0.0873483	328.702	8.18427	0.0605162	69.699	2.22061	0.0490829	9800.62	75.8412	0.170783	228.759	117.911	110.225
095 - 21.d	30	BelowLOD	202.715	708.241	21.4278	5.55659	5.50043	458944	9644.92	0.259331	0.0231773	0.0260857	0.0226859	5.26409	0.429099	0.00966348	BelowLOD	0.132016	0.459571	1.5976	0.462057	0.412817	6.00138	0.914022	0.474678	0.485862	0.134638	0.0741435	30.3401	2.61916	0.293604	124.65	5.05085	0.091669	216.537	7.38648	0.106103	434.281	12.3919	0.210547	91.5309	2.80964	0.0543653	11208	116.33	0.174801	BelowLOD	141.943	167.912
095 - 22.d	30	BelowLOD	231.192	791.57	22.9839	4.53493	4.77531	467629	8896.28	0.636678	BelowLOD	0.00679955	0.0394958	1.1274	0.180313	0.0490358	BelowLOD	0.12339	0.400524	0.974901	0.411703	0.522045	3.4676	0.703327	0.239598	BelowLOD	0.0480383	0.0857156	32.2239	1.63577	0.196857	156.156	4.21733	0.0540103	270.553	3.76509	0.101107	518.577	8.54285	0.145024	99.3438	1.54412	0.042202	11575.8	91.113	0.263731	BelowLOD	153.63	130.371
095 - 23.d	30	BelowLOD	224.726	590.212	18.2732	4.17915	5.75042	466465	8836.05	0.486296	BelowLOD	0.000402366	0.0230763	6.20964	0.363532	0.0921622	BelowLOD	0.101629	0.480962	1.08269	0.382752	0.369909	4.43302	0.752008	0.488215	0.32977	0.132429	0.0295169	27.6888	2.21783	0.403969	106.645	3.02199	0.210554	182.514	2.75016	0.189691	371.375	5.33849	0.255493	74.3888	1.13595	0.034161	10857.1	75.9735	0.123467	176.985	164.157	137.628
095 - 24.d	30	BelowLOD	240.49	677.667	20.2859	4.34865	4.98322	463311	7285.93	0.544849	BelowLOD	0.00743084	0.0475976	7.68448	0.476175	0.0642028	BelowLOD	0.137634	0.503728	2.90102	0.603001	0.699913	7.22083	1.04848	0.3071	0.608152	0.139039	0.114332	40.7839	1.89581	0.309333	148.116	3.71673	0.0272648	236.525	3.87407	0.159259	447.59	6.97352	0.203326	90.8121	1.34329	0.0592028	10514.4	103.65	0.139639	BelowLOD	144.121	143.956
095 - 25.d	30	BelowLOD	265.072	756.949	25.6138	5.58608	3.96696	475851	6108.55	0.67759	0.676088	0.120411	0.0447586	10.302	0.583496	0.057957	1.37965	0.275401	0.369344	5.26125	0.930649	0.187007	7.80961	1.10332	0.448522	0.760135	0.179636	0.0871971	35.2452	2.32111	0.270321	121.064	4.30032	0.201486	205.595	4.80101	0.0500796	398.331	8.63509	0.331004	82.5593	1.70316	0.0288869	10429.4	97.1494	0.11184	193.499	146.816	150.613
109
109 - 1.d	21.9227	BelowLOD	366.15	782.323	21.2985	5.80954	5.77743	471876	8535.42	0.769261	0.313566	0.0900715	0.0427193	13.4068	0.887102	0.0105472	1.45731	0.388683	0.540986	6.07236	1.32994	0.471578	6.81981	1.33696	0.182514	1.40928	0.319121	0.133151	27.2609	2.38487	0.163927	98.8674	3.25621	0.193574	170.819	4.07554	0.107559	330.804	9.00166	0.210116	70.0299	1.7302	0.0502695	9677.45	136.956	0.105899	BelowLOD	183.974	189.801
109 - 2.d	30	BelowLOD	335.146	745.615	37.4586	5.74039	4.91365	475276	7556.35	4.66066	0.685269	0.12141	0.0258207	24.6651	1.52055	0.0431334	4.40794	0.503032	0.550342	18.8944	2.1496	0.153566	20.505	1.99032	0.601906	3.06652	0.327642	0.0833612	64.6361	2.77583	0.363108	178.932	4.39671	0.206168	234.32	4.48993	0.0989359	385.601	7.86758	0.218982	74.3179	1.34606	0.0698502	9184.6	172.279	0.128309	276.847	181.741	203.234
109 - 3.d	28.4085	BelowLOD	375.723	869.708	28.435	6.09669	5.62704	465139	9992.37	0.315716	0.595693	0.147157	0.0813199	9.10587	0.915041	0.0562105	2.40371	0.419619	0.845889	8.18678	1.24681	0.23293	8.56632	1.51518	0.325761	1.31637	0.257207	0.143071	38.7004	3.99471	0.412435	138.622	9.50851	0.248155	202.267	16.834	0.168259	371.23	30.7833	0.21792	73.4408	5.97725	0.0441135	10251.9	295.882	0.0753553	542.792	273.78	232.316
109 - 4.d	30	BelowLOD	395.387	892.133	264.539	45.2655	5.57022	479732	8005.1	0.878839	13.4622	0.68773	0.0796187	122.099	4.85115	0.05341	33.8557	1.75918	0.726013	133.518	7.64913	0.408228	65.0505	5.2894	0.586087	14.2043	1.39903	0.137503	112.847	9.71535	0.426472	224.924	18.0139	0.1915	208.197	9.14992	0.10178	335.45	12.1943	0.22509	65.0365	1.80147	0.05384	9900.82	98.6133	0.113451	4191.64	627.073	240.326
109 - 5.d	30	BelowLOD	298.988	600.845	18.1074	4.46458	4.77252	467362	6849.41	0.460206	0.707556	0.158163	0.0612981	20.2318	1.12129	0.0735102	2.24145	0.409226	0.415363	11.7733	1.82949	0.4647	9.72982	1.28771	0.249702	1.93497	0.381485	0.055642	35.0282	3.11317	0.184954	95.6092	3.70082	0.143194	138.271	3.67863	0.121211	247.547	5.93995	0.176132	48.4637	1.10169	0.0354411	9726.52	115.044	0.131329	572.174	256.082	216.545
109 - 6.d	30	581.641	294.887	555.277	45.072	4.47489	5.04359	481052	7417.61	0.608106	1.76305	0.240526	0.0359194	33.6084	1.61861	0.0640117	5.05082	0.563031	0.5159	27.9857	2.90376	0.426706	18.4816	1.91509	0.418837	3.96428	0.453743	0.14036	46.2744	2.34326	0.29839	113.581	2.9475	0.0812401	152.259	2.46956	0.126968	270.62	6.24037	0.127812	52.3296	1.3686	0.0558634	9921.23	159.25	0.15897	410.206	265.66	203.668
109 - 7.d	30	BelowLOD	232.287	652.531	32.6223	6.5718	4.03419	449561	10351	0.612552	0.845472	0.159325	0.0356656	20.0693	2.02637	0.043122	2.3832	0.447057	0.958344	14.2934	2.69749	0.452613	13.5047	2.06376	0.51132	2.49213	0.48699	0.0996094	39.2901	4.29287	0.20761	107.65	6.99261	0.144359	145.414	5.90638	0.0743873	258.601	7.14968	0.25787	50.1072	1.62242	0.0358778	9615.5	103.817	0.18777	434.193	256.453	219.587
109 - 8.d	30	BelowLOD	364.957	860.193	31.3998	5.93026	4.99802	460510	9239.35	0.225359	1.39595	0.20573	0.0274567	51.8973	2.34283	0.0841058	5.21756	0.496221	0.860147	24.9533	2.5498	0.43612	17.1458	1.83536	0.148129	4.58396	0.558448	0.257718	41.9841	2.85603	0.0559164	103.428	6.99118	0.157871	123.379	7.8835	0.0899118	226.75	8.43363	0.192479	47.3121	1.90363	0.0631875	9950.86	235.036	0.20583	BelowLOD	305.667	274.539
109 - 9.d	30	BelowLOD	287.036	879.597	17.6562	3.75829	4.9844	475591	9619.93	0.707675	0.210058	0.0918863	0.0245649	9.88881	0.739591	0.0726889	BelowLOD	0.14434	0.870668	4.22208	0.992797	0.509711	5.82192	1.18071	0.483236	0.90289	0.187375	0.10469	25.0038	1.67109	0.366379	92.698	2.66502	0.264569	154.778	3.21011	0.11675	311.299	6.78733	0.242047	62.9534	1.11717	0.0691922	9082.37	106.486	0.153336	857.646	346.053	261.601
109 - 10.d	30	9725.39	1069.46	663.21	21.4496	3.42987	3.63216	487526	6713.27	0.262841	37.5796	1.82033	0.0488253	123.707	6.53585	0.0320599	23.732	1.38565	1.20797	105.919	6.85821	0.465128	29.5484	2.7062	0.230692	4.77774	0.579763	0.0554219	49.8307	4.20879	0.149495	94.2139	5.01513	0.177895	117.811	4.15438	0.0800992	208.118	5.17248	0.132789	41.6449	1.00305	0.0657778	10274.2	86.1087	0.200732	225.365	285.883	217.611
109 - 11.d	30	BelowLOD	339.445	650.618	16.9313	3.41099	4.19941	469108	9539.2	0.441308	0.711641	0.212622	0.0540342	15.4859	1.22825	0.0973865	BelowLOD	0.255649	1.53014	8.16859	1.41887	0.427746	7.70945	1.37505	0.459124	1.28898	0.23345	0.0987726	24.0663	1.53418	0.152303	75.5664	3.21464	0.180948	108.678	2.69178	0.151883	190.888	4.32666	0.0310661	37.9793	0.739266	0.0259088	9477.26	169.708	0.187479	428.917	329.543	253.925
109 - 12.d	30	BelowLOD	313.169	712.079	20.9745	4.04593	4.07728	458060	8730.44	0.444935	1.09321	0.328822	0.0593998	23.7647	2.00457	0.0397697	2.18319	0.493069	1.29342	12.2975	2.6328	0.279122	11.6722	1.86486	0.401277	1.78735	0.422573	0.137799	38.4043	3.45688	0.315094	105.87	6.88605	0.218471	151.408	5.85816	0.187596	257.199	10.5376	0.255488	51.3745	2.05338	0.0484437	10084.5	115.432	0.137585	430.377	302.811	303.788
109 - 13.d	30	BelowLOD	391.57	872.902	33.2852	4.07414	4.46217	461822	7226.03	0.451281	4.01411	0.776165	0.0391637	47.4254	3.15832	0.0599688	8.62245	0.790028	2.03708	48.4991	3.99325	0.42683	27.4965	2.43084	0.352693	5.41692	0.559922	0.0706797	54.3735	3.94972	0.287494	120.137	5.61172	0.170261	121.515	4.57156	0.155241	187.868	4.92078	0.195331	34.7643	1.06146	0.0428087	10550.7	144.054	0.158034	BelowLOD	346.753	297.938
109 - 14.d	30	BelowLOD	329.518	692.622	32.9944	9.31407	3.53771	469818	6054.57	10.9087	1.26614	0.245815	0.0673067	22.0068	3.46055	0.0810704	4.27331	0.673529	1.23256	27.1533	4.11179	0.392556	18.0753	3.24568	0.243415	3.8792	0.75335	0.101322	50.3301	5.44878	0.265822	146.004	9.01523	0.220593	206.791	7.19299	0.152906	375.366	10.3816	0.200592	75.2759	1.69878	0.018808	11071.7	101.733	0.0991259	434.7	345.298	278.972
109 - 15.d	30	BelowLOD	314.21	551.672	12.2928	2.99193	4.26736	465243	7126.3	0.363545	0.266257	0.111352	0.0464638	12.7633	0.76247	0.0713656	BelowLOD	0.151175	1.81384	3.35926	0.717887	0.71061	4.46175	0.889531	0.412356	0.469505	0.143908	0.120878	18.7016	1.56489	0.432736	61.8694	2.11663	0.235478	98.0501	2.37165	0.196791	183.269	3.67654	0.25763	36.5209	1.00826	0.0532046	10075.4	134.139	0.114947	662.111	397.868	333.485
109 - 16.d	30	1588.24	543.645	622.344	9.61915	2.41228	3.34648	468151	6931.84	0.758047	17.2005	5.54139	0.0417321	82.6855	18.2002	0.0581655	BelowLOD	3.7051	inf	48.4399	12.3107	0.533636	17.9039	3.07856	0.367604	1.28473	0.288659	0.145171	37.8975	3.72042	0.22262	115.505	5.73626	0.196076	186.677	8.45056	0.0843622	336.989	13.5	0.253274	65.1522	2.01501	0.0497412	11051.4	90.6662	0.124996	BelowLOD	504.05	434.307
109 - 17.d	30	BelowLOD	248.627	865.38	13.9239	3.38975	3.0269	455721	8061.89	0.0948867	0.608815	0.108517	0.0496123	18.3271	0.878399	0.0490652	BelowLOD	0.288668	inf	11.8064	1.50136	0.386333	11.0861	1.33407	0.404818	1.90109	0.293307	0.0628047	33.6895	2.81511	0.361814	90.7725	5.61541	0.0951874	124.832	6.86577	0.162474	226.875	9.63814	0.226225	44.764	1.97601	0.0610664	8400.7	103.252	0.217517	BelowLOD	541.044	429.935
109 - 18.d	30	BelowLOD	395.804	673.302	42.5061	12.1998	4.15295	461193	9154.35	0.448205	3.16493	0.571485	0.0514605	28.7312	3.37831	0.0830911	BelowLOD	0.811128	inf	28.5511	5.46023	0.583978	17.9937	3.09126	0.60641	3.54447	0.6768	0.111549	55.9536	6.39497	0.317057	144.585	6.47411	0.145569	197.953	4.80776	0.148593	356.58	6.18527	0.167407	71.4222	1.37494	0.0508849	8669.67	102.465	0.150193	738.491	844.682	434.52
109 - 19.d	30	BelowLOD	292.811	587.343	63.2216	12.2964	2.73687	463731	10024.6	0.468807	2.63218	0.39832	0.046278	47.5765	3.54241	0.0430019	BelowLOD	1.07634	inf	48.9729	6.03537	0.469013	32.7065	3.63795	0.27235	7.64056	0.961466	0.159101	78.1277	4.9614	0.568232	197.254	7.17496	0.167842	271.313	5.60676	0.131392	473.013	8.01757	0.203494	94.718	1.52796	0.0189981	8653.87	129.538	0.214699	939.954	675.865	434.547
109 - 20.d	30	BelowLOD	316.457	608.927	17.2398	3.4721	3.22574	462167	6929.39	0.325688	1.05545	0.204164	0.0870479	20.4341	1.81282	0.0567574	BelowLOD	0.90432	inf	20.4003	3.03285	0.533479	15.7086	2.12187	0.397899	3.23341	0.572518	0.105562	47.4273	3.15862	0.185719	140.426	5.34583	0.144857	204.986	4.58096	0.0200896	380.764	8.07354	0.254121	76.4962	1.45448	0.0367781	9188.21	120.365	0.145782	BelowLOD	5961.93	655.904
111
111 - 1.d	19.7608	BelowLOD	403.951	959.654	8.40867	2.29716	3.21906	484738	12082.8	0.335932	1.78987	0.583192	0.00867315	15.0956	1.32327	0.137045	BelowLOD	0.631861	inf	12.5665	2.53973	0.509612	9.92106	1.5748	0.282236	1.25297	0.247656	0.0778184	37.8721	2.91814	0.277899	116.999	6.78746	0.177376	172.27	9.72078	0.0544063	300.944	17.8859	0.300254	60.9042	3.54798	0.039343	8933.99	128.87	0.172655	BelowLOD	13203.8	783.335
111 - 2.d	30	BelowLOD	251.599	832.263	14.5288	2.56955	2.42288	481981	6701.66	1.62346	BelowLOD	0.0154309	0.0586295	3.49653	0.271432	0.0677866	BelowLOD	0.137262	inf	1.20953	0.42668	0.313971	2.11166	0.571351	0.353231	0.420065	0.103256	0.0790692	11.0332	1.32354	0.294456	38.6148	1.50706	0.188331	70.3698	1.69635	0.0186474	143.635	3.41929	0.189821	30.9762	0.697679	0.0185229	7613.89	99.0634	0.105736	BelowLOD	15880.7	677.211
111 - 3.d	21.5087	BelowLOD	541.269	1228.23	9.81858	3.07624	3.49217	479827	11670.7	0.934399	0.150088	0.0801877	0.0901562	8.96968	0.751967	0.0679691	BelowLOD	0.346671	6.24239	7.56031	1.80299	0.479625	11.3685	2.44397	0.23571	1.82589	0.339579	0.146768	44.2743	3.53356	0.276718	152.445	7.94816	0.257142	222.049	10.7023	0.164729	388.921	16.2103	0.0831028	78.8782	3.0963	0.0988818	8364.27	126.79	0.2965	BelowLOD	11122.3	1207.09
111 - 4.d	30	BelowLOD	287.126	798.161	16.8889	3.51859	2.78702	468065	8170.32	0.729103	0.669324	0.160071	0.0367021	11.1643	0.686507	0.0716499	4.25866	0.744212	3.33665	9.80362	1.51236	0.481348	10.3666	1.22412	0.305689	2.08801	0.31566	0.102824	38.4407	2.83988	0.22653	118.418	6.39989	0.162961	180.115	8.31358	0.175269	334.457	13.4566	0.150732	67.1083	2.10575	0.044841	7450.02	82.5425	0.0788579	BelowLOD	4481.84	1070.31
111 - 5.d	30	BelowLOD	384.332	692.798	65.8238	12.8508	2.71318	476009	6933.95	2.10365	0.578176	0.116831	0.0561221	10.4584	0.91921	0.0318845	5.12901	1.04687	0.771475	11.9425	1.72399	0.472285	11.1976	1.16407	0.328067	1.95586	0.297357	0.0950358	37.9803	2.62165	0.285213	112.515	4.15048	0.12619	159.691	5.5074	0.10817	280.38	8.17037	0.189527	57.2075	1.80021	0.0708924	7874.61	142.214	0.15419	BelowLOD	2701.97	862.181
111 - 6.d	30	BelowLOD	311.259	727.603	18.2106	4.79309	3.17372	480158	6531.62	0.205307	0.532748	0.112062	0.0598767	12.05	0.865212	0.0618879	6.87082	0.989986	1.0058	13.2203	1.53892	0.559773	11.8526	1.54984	0.509051	2.70443	0.422835	0.0794677	45.3937	2.99719	0.51085	126.973	3.34532	0.282365	175.767	2.88626	0.121057	314.296	4.85812	0.0660917	63.3163	1.24621	0.00754909	7615.82	75.1495	0.225945	BelowLOD	3140.96	844.428
111 - 7.d	19.2548	BelowLOD	343.211	638.178	14.2405	2.34225	2.40902	493126	8640.69	0.876525	0.334019	0.157943	0.0237655	15.1354	1.33553	0.0678611	5.51679	1.19712	0.690395	13.3671	2.55709	0.434321	9.80032	1.61562	0.423782	2.3432	0.448651	0.115107	39.8789	4.43997	0.203787	119.139	11.2044	0.139553	196.701	18.6851	0.0976779	338.376	21.8421	0.0608683	70.5957	4.15948	0.013654	8700.05	100.137	0.208495	BelowLOD	3896.39	1008.07
111 - 8.d	30	BelowLOD	284.635	598.577	11.0882	2.36705	2.42811	470912	7477.65	0.0953885	BelowLOD	0.0372728	0.0642295	5.86655	0.4111	0.0378361	1.82086	0.575303	0.43654	4.59074	0.836402	0.45392	4.88543	0.790238	0.769397	0.945997	0.214333	0.0768198	24.7465	1.78881	0.21664	75.2115	3.19289	0.268992	111.784	3.27119	0.0822428	201.326	6.80186	0.273361	41.3691	1.12563	0.0286941	7969.94	90.0813	0.183094	BelowLOD	3232.25	1123.22
111 - 9.d	30	BelowLOD	307.055	754.303	14.1122	2.97871	2.87053	476327	7750.42	0.972142	0.862228	0.19794	0.0601987	13.862	1.81521	0.0482678	13.5489	2.09011	0.415561	13.9356	2.01487	0.454366	11.6546	1.67694	0.390972	2.97824	0.381186	0.0364299	38.9659	2.9176	0.351374	106.842	6.22498	0.147045	150.824	8.31891	0.0597419	256.039	13.6003	0.186734	52.2589	2.86675	0.0459817	7606.43	118.05	0.163522	BelowLOD	4616.82	1055.12
111 - 10.d	30	BelowLOD	272.242	577.217	15.2111	2.75579	2.50679	474440	8637.26	0.969115	0.1446	0.064118	0.0504799	4.07773	0.319652	0.0447497	2.05443	0.695024	0.308354	3.66576	0.950332	0.643481	4.41495	0.899426	0.404966	0.752409	0.169323	0.0618057	20.2667	1.25838	0.171536	63.4164	2.90657	0.125691	100.662	4.5491	0.114563	188.172	7.38225	0.226413	40.1277	1.16489	0.0254551	7292.95	89.6033	0.0966816	BelowLOD	5055.93	973.706
111 - 11.d	15.391	BelowLOD	369.322	783.12	11.6384	3.77464	3.43942	487665	12215.6	1.0548	1.24745	0.876921	0.067614	11.2772	2.53336	0.0918268	10.0173	4.05861	0.339809	9.17157	2.36878	0.457738	7.51355	1.95145	0.148545	1.24467	0.339777	0.13425	24.8583	2.95117	0.512746	80.6469	6.09042	0.156721	112.206	8.34544	0.139958	215.49	16.7243	0.274846	43.8821	2.63039	0.0619214	7822.81	88.0337	0.224056	BelowLOD	12390.1	1178.17
111 - 12.d	19.3008	BelowLOD	297.296	819.54	17.4759	4.37782	2.55822	493490	7927.95	0.794007	0.558055	0.143315	0.0652758	15.5253	1.911	0.0628305	18.7461	3.15152	0.0906371	16.435	2.2764	0.564678	21.2857	2.1575	0.438058	3.1429	0.655909	0.144444	56.6932	4.1615	0.349891	176.497	7.03295	0.22381	249.913	10.0678	0.0363477	427.185	13.839	0.185857	86.0081	2.77148	0.0365742	8378.18	110.715	0.195165	28230.8	69086.2	950.542
111 - 13.d	30	BelowLOD	285.922	671.446	14.7829	2.76069	1.98758	478997	8848.22	0.577104	BelowLOD	0.0228436	0.0224508	4.71388	0.400298	0.0547134	2.58989	0.755725	0.162044	3.79411	0.723406	0.542037	7.155	1.1316	0.430912	0.883803	0.201372	0.0850059	24.4846	1.62573	0.432601	81.7938	3.23303	0.112421	124.412	3.14206	0.0809689	231.109	5.72403	0.0581406	49.7031	1.02968	0.0612662	7577.39	134.059	0.200285	5744.72	5727.28	743.591
111 - 14.d	30	1826.37	877.07	1014.64	33.5111	5.90172	3.20532	447858	11578.7	1.27056	8.72842	2.47702	0.140331	42.2813	7.7521	0.130231	54.2806	11.2243	0.147851	34.6304	7.1775	0.20264	11.1055	1.76669	0.498258	3.19638	0.456569	0.149861	22.5658	2.03457	0.277917	60.3684	3.41078	0.316007	90.2977	4.55765	0.226218	168.386	7.50318	0.242435	35.4639	1.57917	0.0546348	7712.03	78.3985	0.159183	7407.28	3784.89	1017.71
111 - 15.d	26.3385	BelowLOD	588.288	968.155	28.9962	8.56986	3.62903	475586	9190.51	0.707832	3.87357	0.529844	0.0740803	49.7562	4.69896	0.0586098	55.9434	6.16423	0.0647643	43.4283	4.29428	0.667476	21.3581	2.88721	0.0961094	7.03471	0.929392	0.0474112	39.0054	4.00644	0.622707	95.6838	6.42643	0.290593	133.481	7.36169	0.202407	242.752	13.7544	0.42116	49.5237	2.61832	0.0724887	7553.66	66.5538	0.165925	3065.73	2980.66	1286.46
111 - 16.d	30	BelowLOD	292.748	826.724	15.9137	2.42011	2.61448	479343	6541.93	0.96251	0.193619	0.0776912	0.0502729	5.86332	0.348537	0.0472195	2.14854	0.490194	0.0885995	8.80737	1.15647	0.564656	10.2049	1.18291	0.176739	1.71856	0.315387	0.0310073	39.2502	1.68005	0.337749	121.591	3.57224	0.164074	174.763	3.59996	0.180079	304.842	5.52279	0.135283	65.7246	1.36215	0.0331465	7131.32	65.0036	0.147489	BelowLOD	350.6	469.029
111 - 17.d	30	BelowLOD	260.386	685.963	14.6609	2.69003	2.88686	483934	5694.07	0.772593	0.240069	0.0937136	0.0554202	7.50022	0.975606	0.0929479	1.91203	0.469275	0.0561021	7.86866	1.49897	0.558573	6.01645	1.15905	0.359353	1.8893	0.326743	0.239383	21.1807	1.47107	0.362831	68.9226	2.34629	0.227832	96.9169	3.42706	0.125892	182.019	5.39157	0.228402	38.3559	1.2361	0.0574457	7395.18	62.5963	0.251848	BelowLOD	344.436	499.381
111 - 18.d	30	BelowLOD	299.076	781.202	14.346	2.68897	2.54254	469391	9117.39	0.316006	0.101063	0.0619663	0.0556964	4.54738	0.574145	0.0602902	0.558824	0.268496	0.0657877	1.75188	0.826766	0.593463	2.1164	0.543028	0.448889	0.584583	0.16266	0.0502399	11.3607	1.09389	0.264739	40.4495	1.61655	0.0272679	67.8141	1.44073	0.162244	132.653	3.76492	0.284553	28.6377	0.716784	0.0339809	7820.45	89.7218	0.162749	BelowLOD	227.908	348.379
111 - 19.d	22.3367	BelowLOD	311.222	616.233	9.26746	2.66465	2.57409	496248	5569.97	0.445493	0.491835	0.140844	0.0561031	17.8684	0.989946	0.0424302	2.20748	0.399647	0.0470132	14.3076	2.3826	0.298295	12.2851	1.68604	0.246213	2.32899	0.338683	0.0884121	44.0472	3.42914	0.28126	165.866	5.92033	0.167721	263.023	7.72245	0.154998	470.761	13.2674	0.190057	95.7532	3.22431	0.0412173	10173.1	89.8984	0.0448802	473.468	229.033	426.219
111 - 20.d	30	BelowLOD	476.036	898.966	12.5684	2.87963	3.96686	480362	7155.28	0.838174	0.508722	0.143126	0.111579	9.59802	0.727797	0.0959126	1.93369	0.317176	0.100792	13.5534	2.00829	0.890874	10.218	1.455	0.379293	2.07674	0.360801	0.14575	35.5479	3.27094	0.72153	100.667	6.29796	0.374901	148.685	6.63377	0.12643	255.987	12.2211	0.279491	54.6688	2.22859	0.0571664	7303.76	67.463	0.365802	BelowLOD	316.794	714.366
111 - 21.d	19.2088	BelowLOD	488.07	1000.36	10.4319	3.41381	2.61914	489604	10768.4	0.634825	0.37573	0.138294	0.0928991	12.9872	1.04619	0.0911071	1.44599	0.298015	0.0387569	12.0243	2.20832	0.631568	9.54897	1.74633	0.729424	2.3585	0.440928	0.174587	39.9329	4.35379	0.354758	130.907	11.5281	0.159449	196.717	15.5053	0.110582	338.641	21.2143	0.322258	72.5578	3.80686	0.10018	8187.02	206.055	0.142585	BelowLOD	296.779	388.382
111 - 22.d	17.2309	BelowLOD	372.428	686.355	12.4654	3.27507	2.8019	491236	7226.13	0.472018	0.398351	0.150885	0.068665	24.3554	3.9157	0.0983973	1.55823	0.467359	0.0538677	19.7171	5.7268	0.49263	17.9031	4.01255	0.291781	3.4696	0.996063	0.111753	73.9537	18.1422	0.251453	207.775	41.6281	0.240496	291.352	53.0527	0.160407	514.552	80.174	0.228202	102.292	16.0063	0.0419757	9210.91	151.854	0.158958	479.229	225.277	361.01
111 - 23.d	30	BelowLOD	267.052	753.593	8.28549	1.96119	2.81156	475477	8299.31	0.710602	0.620069	0.123165	0.0234801	18.6852	1.12121	0.0620718	1.76002	0.295725	0.012927	12.0493	1.31495	0.390748	6.90669	1.29758	0.367063	2.42333	0.423029	0.144934	20.8656	2.05608	0.32378	63.5412	2.97227	0.0773175	104.621	3.70754	0.038262	209.194	6.0179	0.221549	45.0697	1.34683	0.0324485	9670.85	103.819	0.183874	BelowLOD	185.664	247.148
111 - 24.d	30	BelowLOD	248.752	668.53	10.3752	2.68946	3.04104	469401	10333.6	0.790442	0.155898	0.0576154	0.0479733	8.18346	0.457011	0.0911392	0.425561	0.0973234	0.0328888	4.74011	1.07097	0.420739	5.50751	0.904243	0.273633	1.04287	0.2289	0.110455	22.1819	1.71626	0.220316	82.9019	3.94783	0.172061	139.966	4.74542	0.133028	271.924	6.60913	0.218079	59.9564	1.49257	0.0481107	8191.83	117.012	0.225572	BelowLOD	144.152	261.652
111 - 25.d	30	5239.17	1208.82	814.459	37.5302	6.04289	3.34904	477097	8927.35	0.406823	24.4836	4.24343	0.0533786	104.787	12.2417	0.0445212	15.2979	1.91489	0.0429777	99.4591	11.119	0.219966	33.7539	2.66689	0.285833	10.959	0.892012	0.0850045	66.289	3.76222	0.479324	173.094	6.86077	0.126941	241.368	8.18224	0.0879281	408.926	14.1541	0.393599	81.6109	2.46257	0.0389493	10061	143.784	0.140834	253.515	152.061	218.845
168
168 - 1.d	30	BelowLOD	331.731	854.1	25.8029	3.39549	3.69518	475091	7624.57	0.330226	1.1863	0.216999	0.0446678	105.698	3.85372	0.0772717	BelowLOD	0.732883	inf	116.386	7.70751	0.387746	91.9722	5.67331	0.446461	20.276	1.44909	0.0959433	129.435	7.40986	0.277202	261.591	8.78263	0.204547	294.111	6.90672	0.168683	546.68	9.94983	0.191987	103.996	1.76194	0.0865045	9229.53	123.325	0.223209	BelowLOD	18.4191	46.6533
168 - 2.d	30	BelowLOD	314.002	807.765	22.5891	3.75313	4.04747	480485	8140.56	0.543954	0.274233	0.0933053	0.069614	64.221	1.34907	0.0639083	BelowLOD	0.249534	inf	21.5156	1.98004	0.383503	24.8166	2.50944	0.47142	5.90924	0.566777	0.0845382	53.2871	3.14033	0.174872	139.503	3.87023	0.164915	213.148	4.01567	0.107463	399.929	6.60374	0.248309	76.9876	1.59714	0.0420797	10262.1	146.74	0.144811	BelowLOD	18.8405	33.0381
168 - 3.d	30	BelowLOD	325.307	858.534	30.6642	4.15581	3.49057	486028	7372.25	0.679113	0.126635	0.0604711	0.0733563	30.9252	0.915125	0.098717	BelowLOD	0.187581	inf	16.7738	2.08226	0.460788	17.7873	1.51206	0.622674	6.14969	0.489865	0.0709324	60.7195	3.50596	0.201065	172.179	6.89479	0.0766079	260.014	7.8598	0.135036	479.376	16.4158	0.202959	93.2811	3.43927	0.038122	7306.92	76.0949	0.050482	BelowLOD	13.7384	41.5786
168 - 4.d	30	BelowLOD	345.364	903.905	23.9846	3.58528	3.58973	474283	9950.78	0.585199	BelowLOD	0.051869	0.0639709	40.153	1.65194	0.0906276	BelowLOD	0.290231	inf	20.6883	2.41179	0.631281	21.0056	2.39193	0.149358	5.88139	0.55703	0.123523	71.6979	3.29946	0.310389	206.194	5.69497	0.25379	310.948	5.74154	0.269408	526.66	10.6658	0.145286	101.277	2.11604	0.0493826	8457.83	92.8543	0.178326	BelowLOD	19.1292	31.3238
168 - 5.d	30	BelowLOD	304.302	816.055	51.4337	7.55292	2.93279	460507	7064.17	0.436531	0.225444	0.0943885	0.0838579	34.9136	1.44849	0.0106148	BelowLOD	0.268525	inf	17.1263	2.52478	0.586897	16.46	2.24265	0.526191	4.71536	0.521675	0.0788801	47.3609	3.33588	0.0525245	128.183	3.71819	0.180411	200.633	4.70626	0.209973	370.294	6.63005	0.150056	72.0786	1.17305	0.0513198	8308.69	119.333	0.152615	BelowLOD	18.5198	42.3589
168 - 6.d	30	BelowLOD	268.245	822.995	19.5784	3.29535	3.34014	483979	6397.65	0.731811	0.349496	0.0963608	0.0870141	53.655	1.53881	0.0413345	BelowLOD	0.34688	inf	22.2584	3.02	0.600145	24.6374	2.66754	0.432671	5.38977	0.563714	0.0648239	58.7403	3.17255	0.358195	166.759	4.94813	0.134722	252.452	4.4156	0.0581144	474.07	9.08039	0.206703	93.2297	1.80288	0.0744617	8854.19	77.2481	0.0512831	44.0447	19.5563	37.3675
168 - 7.d	30	BelowLOD	549.185	1207.12	24.0515	5.94178	4.04491	468999	12393.4	0.85347	0.122704	0.0664331	0.085548	60.8141	1.79255	0.0357301	BelowLOD	0.37057	inf	26.1385	3.07661	0.575529	30.2745	2.63744	0.805092	7.61107	0.85704	0.144192	76.9778	4.11708	0.530937	207.73	6.72685	0.117292	312.173	6.16307	0.18487	561.141	10.7793	0.213393	105.222	1.89835	0.0378393	9516.86	146.059	0.0322074	BelowLOD	24.9065	41.715
168 - 8.d	24.4526	BelowLOD	437.089	832.076	23.3303	3.4716	3.82018	476649	11171.9	0.7097	1.72201	0.418859	0.0406369	47.4483	2.38064	0.0716414	BelowLOD	0.708795	inf	29.332	3.4276	0.6818	29.1845	3.94757	0.300615	6.47038	0.657309	0.0319023	77.9862	4.58715	0.281566	199.712	3.81829	0.0553254	284.236	6.00922	0.172851	480.62	9.04799	0.195079	91.0327	2.19096	0.078165	8786.1	75.9806	0.341056	36.5084	20.257	34.1549
168 - 9.d	30	BelowLOD	355.981	849.438	22.3439	4.68055	3.19242	448787	7725.47	1.14038	0.338582	0.101114	0.0302571	59.7164	2.15831	0.0496581	BelowLOD	0.755585	inf	26.9343	2.49741	0.672359	30.6108	2.2277	0.586185	5.70761	0.483965	0.124749	71.8144	4.3295	0.202438	209.562	8.38322	0.216399	322.899	12.082	0.0801944	576.866	19.8299	0.066707	109.291	3.66012	0.0316119	9717.93	154.047	0.156741	40.3751	20.4483	32.5944
168 - 10.d	30	BelowLOD	473.348	978.488	27.1003	5.20539	3.70967	471261	7835.98	1.20523	0.560114	0.138513	0.0844855	26.3244	1.19861	0.0256045	BelowLOD	0.750674	inf	18.0671	2.57581	0.465476	19.1049	2.28143	0.698164	4.84772	0.527273	0.139772	40.7532	3.30222	0.175754	111.094	4.11624	0.327649	169.137	4.10091	0.15809	314.902	7.2223	0.299008	61.5687	1.37599	0.0718031	8120.97	80.8776	0.214181	BelowLOD	22.3648	43.3094
168 - 11.d	30	BelowLOD	270.541	674.25	18.9557	3.34075	2.97444	466628	8378.4	0.743318	0.223886	0.0775906	0.0667739	43.0286	2.02268	0.0489836	BelowLOD	1.11476	inf	22.8945	3.49013	0.478192	25.1316	2.67326	0.609692	5.75235	0.662228	0.0805592	71.0621	3.96329	0.286209	216.315	5.22305	0.190066	332.386	6.10712	0.076025	585.588	10.7082	0.171854	109.202	2.10794	0.0131511	8866.76	128.108	0.192609	BelowLOD	16.856	30.094
168 - 12.d	30	BelowLOD	314.924	763.119	27.5822	3.84143	3.11457	482271	7700.1	0.553253	1.68915	0.386152	0.0439367	42.096	2.45688	0.0762008	BelowLOD	3.68988	8.83491	26.4168	3.09873	0.462883	22.3086	2.77075	0.421018	4.39052	0.607575	0.0788615	50.1843	3.92205	0.295806	125.001	5.41468	0.148617	174.202	3.55877	0.0688664	288.984	6.36367	0.279939	54.3885	1.05571	0.0498171	10535.6	60.0209	0.0964625	45.4775	16.6496	30.4265
168 - 13.d	14.839	BelowLOD	573.162	755.417	14.3225	3.01411	3.18594	475709	10347.8	1.01864	5.61299	2.42931	0.0815064	78.1004	6.57217	0.0488826	BelowLOD	21.5882	0.8879	47.2395	9.5354	0.501165	38.9146	5.82859	0.320633	7.20563	0.815043	0.0340859	85.3742	7.755	0.330463	218.681	10.4783	0.17674	309.312	6.89658	0.189183	569.58	19.1481	0.142049	106.499	2.0574	0.0536168	10358.4	193.44	0.218123	BelowLOD	27.487	37.9084
168 - 14.d	12.1711	BelowLOD	558.086	739.847	19.7228	4.33279	5.02609	507045	12834.9	0.170362	0.959992	0.365486	0.0573496	79.2696	7.16558	0.139303	300.298	72.71	0.550249	74.062	12.7866	0.802404	59.31	10.2459	1.12125	14.8103	2.13432	0.0467265	102.874	9.82523	0.728174	261.701	12.3996	0.115418	326.961	10.521	0.120843	626.408	18.4486	0.361054	112.865	2.66166	0.0466185	9238.7	195.611	0.259016	BelowLOD	32.1573	53.8381
168 - 15.d	30	BelowLOD	427.649	796.782	14.1497	2.60301	3.63298	473498	10873.9	0.701695	0.0922651	0.0544408	0.0602116	33.5908	1.16524	0.0923247	8.32001	1.78976	0.246751	12.7344	2.43311	0.262665	14.7968	2.40795	0.39126	3.77952	0.576659	0.0182581	35.1871	3.23781	0.394815	107.998	5.08054	0.228828	153.218	4.46792	0.142943	298.526	5.52642	0.277048	60.0296	1.17065	0.0226309	9491	200.499	0.113148	BelowLOD	22.4417	42.0378
168 - 16.d	30	BelowLOD	303.484	736.755	62.6377	12.1386	3.1982	452767	7942.22	0.394106	0.636926	0.198378	0.0375316	25.9522	0.982354	0.039509	2.37439	0.693604	0.223278	3.37857	0.789452	0.317607	3.84405	0.839459	0.264803	1.45147	0.262598	0.0922766	24.1249	1.77398	0.398105	81.5123	2.88197	0.200454	139.229	3.59043	0.110775	259.647	4.95189	0.157512	51.7504	1.03119	0.0640392	8618.99	114.707	0.13491	BelowLOD	18.4605	39.857
168 - 17.d	30	BelowLOD	252.133	821.31	14.4064	2.52819	2.80682	471288	8108.03	0.271084	BelowLOD	0.000309123	0.101103	36.3399	0.952896	0.0192336	0.957984	0.347732	0.10204	5.45835	1.27049	0.154097	8.10198	1.25428	0.384668	3.1142	0.371303	0.134309	37.9982	2.75007	0.223155	156.095	3.31157	0.154801	314.849	4.53401	0.084959	649.579	9.1147	0.148685	132.905	2.15946	0.0444192	8120.04	95.0437	0.233869	BelowLOD	18.0739	36.4999
168 - 18.d	30	1673.82	863.764	700.755	16.2723	3.58133	2.70143	465901	8239.52	0.386016	5.08695	2.37261	0.0511039	42.1513	6.13353	0.0498753	8.82085	3.74671	0.190423	16.0075	6.59139	0.0786663	7.06131	1.30961	0.250226	1.49203	0.238739	0.11764	24.4196	2.24855	0.325667	88.5231	2.66219	0.190724	164.561	4.04658	0.0195958	330.763	7.13149	0.24052	68.3683	1.4704	0.044698	9917.82	134.217	0.189174	BelowLOD	23.7775	41.1576
168 - 19.d	30	BelowLOD	338.738	900.407	33.8139	6.98551	2.7162	480744	7417.87	0.380526	0.671242	0.283309	0.059344	41.1629	1.09456	0.056795	3.98625	0.656011	0.0925881	17.9975	2.32903	0.350372	17.5774	2.29669	0.342426	4.22891	0.443432	0.0868577	46.3061	2.7494	0.497082	137.804	4.14105	0.217314	220.689	5.32023	0.177272	429.233	6.43017	0.335885	82.5062	1.44214	0.0307228	9109.02	171.537	0.191452	BelowLOD	21.407	38.6874
168 - 20.d	30	BelowLOD	498.766	978.101	8.45777	2.45239	3.83705	477337	9433.76	0.753433	2.61092	0.680393	0.0636546	49.7297	2.88051	0.0729594	8.35829	2.04107	0.258145	32.9309	4.52428	0.333234	27.7856	2.35123	0.446104	7.08097	0.530425	0.150001	88.4201	3.53297	0.348388	262.788	5.38029	0.163098	396.252	6.8167	0.181989	712.594	11.1347	0.35059	134.046	1.86504	0.0725357	8686.99	63.3257	0.33276	68.8831	28.7759	43.5363
168 - 21.d	30	BelowLOD	305.685	603.803	26.8855	4.13563	2.69695	437196	14511.7	0.426861	0.209427	0.0753474	0.048852	37.2449	1.87026	0.0894868	3.43504	0.583446	0.168335	20.0521	2.51617	1.22978	21.6548	2.32214	0.298948	6.70894	0.525694	0.115832	62.6013	3.64165	0.405137	180.488	4.22199	0.139911	278.841	4.68426	0.179929	512.201	9.44497	0.228894	102.185	1.70807	0.0537409	7375.06	93.512	0.137429	BelowLOD	26.6693	45.4941
168 - 22.d	30	BelowLOD	426.138	762.238	13.3134	2.52687	3.15983	486761	8216.39	0.561628	0.226552	0.0679768	0.0592016	55.6788	1.5234	0.0590683	4.77635	0.860763	0.0577171	22.9365	2.44706	0.458846	26.1621	2.39728	0.509135	6.54951	0.681947	0.0767174	68.604	3.06937	0.182889	194.496	4.00763	0.226347	288.764	5.18561	0.108867	518.313	6.69934	0.350056	102.203	1.65641	0.0387715	8345.18	116.45	0.243547	BelowLOD	25.2548	57.1315
168 - 23.d	30	BelowLOD	315.938	598.704	21.593	3.9516	3.95524	480424	7796.13	0.382911	0.143669	0.0571464	0.0438511	95.6035	1.35115	0.0281084	4.33771	0.692042	0.135248	22.2335	1.66789	0.374569	21.5217	1.46381	0.374189	9.00052	0.417317	0.0932521	77.9399	3.66233	0.226948	231.267	4.3071	0.07693	348.758	5.60933	0.0791173	611.771	9.98545	0.164185	120.44	1.66054	0.0495135	7808.11	83.0517	0.171172	BelowLOD	19.5955	43.0809
168 - 24.d	20.4968	BelowLOD	358.386	726.36	18.3697	4.03006	3.37243	462119	11376.4	0.899918	1.90673	0.398532	0.084983	69.9373	4.81156	0.0569353	12.342	2.23972	0.271372	43.5397	6.75945	0.40477	38.3717	5.03902	0.384595	8.69546	0.913309	0.190226	82.4905	6.9172	0.366917	234.915	11.1888	0.176579	331.9	8.1269	0.0903345	593.17	12.547	0.275854	114.701	2.08045	0.0400756	9677.99	134.127	0.143665	BelowLOD	23.0081	43.6389
168 - 25.d	24.0386	BelowLOD	483.483	959.825	19.265	4.35969	4.10204	472332	12232.5	1.04594	0.406537	0.147905	0.121361	75.6459	5.15121	0.0282354	15.1102	3.05848	0.265479	42.0616	5.91078	0.67002	39.2987	5.67955	0.498118	8.97738	1.27165	0.10226	78.6558	8.58712	0.292771	201.614	13.78	0.247492	279.222	8.82438	0.123285	531.287	12.3242	0.369028	102.571	2.53354	0.0386212	10045	225.384	0.225672	BelowLOD	33.9316	49.383
168 - 26.d	30	BelowLOD	334.841	735.29	15.182	2.52025	3.13934	480697	7196.81	1.03286	1.63033	0.484245	0.058032	66.2829	1.7177	0.122711	14.3574	2.4401	0.537388	24.9127	2.83072	0.180497	19.5306	1.88905	0.722917	4.39142	0.471713	0.130745	47.6806	3.10905	0.415389	140.334	4.89803	0.218394	217.912	4.438	0.222676	425.877	8.04823	0.19191	83.8441	1.64645	0.0321967	10378.1	149.318	0.162818	81.7618	28.8604	45.0981
168 - 27.d	17.8289	BelowLOD	590.683	1311.45	19.3463	4.6648	3.77706	487699	12480.6	0.833615	0.34481	0.145649	0.0263407	74.4095	7.78732	0.0672586	25.4984	4.99788	0.525023	38.9963	5.10124	0.837979	35.4512	5.3966	0.266388	8.13934	1.17183	0.100782	76.2138	6.29856	0.434997	211.976	8.32183	0.140702	300.091	7.37069	0.333281	535.857	13.4136	0.325558	101.431	3.09306	0.0883177	9849.15	144.536	0.209549	BelowLOD	50.5482	69.9022
168 - 28.d	30	BelowLOD	300.649	877.923	38.653	5.28021	3.1167	470622	7799.38	0.230657	0.588053	0.130854	0.0479958	64.5382	3.1495	0.0651214	135.658	21.5688	1.4876	36.9048	4.3812	0.638449	36.1471	3.1296	0.50718	9.10737	0.687317	0.118301	84.9355	4.10702	0.355032	228.474	7.73382	0.0331847	318.513	6.83465	0.181763	569.843	9.57927	0.0753242	111.699	1.90501	0.0434486	8442.82	128.353	0.211356	56.2844	29.6683	55.4921
168 - 29.d	30	BelowLOD	289.804	765.134	34.959	3.58762	2.60957	471899	9048.29	0.197892	BelowLOD	0.0208921	0.0580606	11.3396	0.720872	0.0455039	BelowLOD	1.80183	inf	5.97813	1.20358	0.481272	9.02581	1.23561	0.1796	3.42175	0.315796	0.0903439	33.7348	2.37807	0.401535	102.696	3.61342	0.134924	168.913	3.97	0.128963	317.072	7.50013	0.176895	66.1793	1.42635	0.0374102	6725.54	50.3295	0.123639	BelowLOD	21.0644	37.7763
168 - 30.d	20.5428	BelowLOD	618.774	979.404	25.7501	4.69596	3.79337	476322	11215	0.71828	2.44603	0.954227	0.0620603	83.6648	4.55054	0.0733826	BelowLOD	4.87334	inf	47.496	6.61685	0.693812	35.1613	5.37703	0.585987	7.38151	1.03886	0.15071	66.7479	7.21297	0.46212	157.459	9.73736	0.083082	220.56	8.58012	0.132504	441.778	17.2066	0.307966	85.9442	2.29557	0.0519395	10167.4	159.82	0.288014	BelowLOD	30.8175	68.8918
181
181 - 1.d	27.7645	BelowLOD	265.29	714.907	3.94799	1.51249	2.20797	477105	9199.87	0.591892	1.11441	0.561449	0.0379138	24.6909	1.34164	0.0731363	0.499074	0.155713	0.0312741	4.77241	1.04969	0.515436	5.79019	0.9482	0.178353	0.77219	0.160935	0.0682334	24.2087	1.58232	0.264434	111.284	5.48296	0.252152	192.399	9.43834	0.0944531	361.264	16.498	0.251989	76.2191	3.18729	0.0233247	9828.61	127.466	0.153911	BelowLOD	146.824	207.005
181 - 2.d	30	BelowLOD	314.846	642.363	13.7008	2.40894	2.55901	483279	7685.99	0.103181	BelowLOD	0.0202072	0.0482584	6.58877	0.365848	0.039994	0.0925221	0.0495873	0.0386539	1.22692	0.504222	0.265987	2.96439	0.59162	0.377968	0.733117	0.164738	0.074606	18.4741	1.98872	0.210871	71.3708	2.83314	0.211319	109.919	3.79381	0.156764	194.071	4.97959	0.215504	41.204	1.13451	0.0234618	8762.65	137.753	0.168693	404.546	139.862	308.508
181 - 3.d	17.4149	BelowLOD	506.212	1240.15	13.932	4.06511	3.63161	500089	9979.54	0.841772	14.7794	1.40142	0.0702006	82.5671	8.24184	0.0434985	12.543	1.0234	0.0255033	94.7445	10.0037	0.51747	28.5135	4.03506	0.395385	0.461733	0.163738	0.139026	61.3625	3.27026	0.403397	246.316	9.17256	0.276653	422.238	14.2556	0.182512	913.757	42.2892	0.231686	188.489	8.21957	0.0669135	14392.7	161.384	0.209759	260.71	220.397	260.582
181 - 4.d	30	BelowLOD	268.601	727.517	16.0444	3.54707	2.63181	490008	6919.08	0.560728	0.059126	0.041904	0.0465034	2.66161	0.261562	0.00975415	0.0901795	0.0412425	0.0242994	3.38675	0.821514	0.442056	6.55917	0.87779	0.237841	0.327233	0.109891	0.0763685	37.1565	2.22918	0.254397	155.349	6.1536	0.175252	231.481	7.52126	0.052886	398.342	12.1946	0.269544	80.1527	2.38489	0.0406322	11197.4	97.5709	0.148081	BelowLOD	116.278	221.892
181 - 5.d	30	BelowLOD	265.915	771.653	17.2944	2.66586	3.43696	478471	10315.8	0.102019	BelowLOD	0.000591711	0.0170208	9.29161	0.480754	0.0437958	0.173785	0.0533357	0.0276138	6.31142	0.984531	0.639687	6.95002	1.03446	0.344774	1.33227	0.220804	0.12371	34.7823	2.17206	0.131053	124.88	2.53886	0.10928	197.413	3.51334	0.129096	336.403	6.15566	0.218169	69.5418	1.22011	0.0490177	7942.53	94.8535	0.138013	BelowLOD	84.8708	166.481
181 - 6.d	19.8528	BelowLOD	384.575	1081.22	36.1274	13.2588	3.43008	486066	12150.3	0.550561	1.04872	0.434651	0.0409493	6.38476	1.8204	0.070163	0.778703	0.294289	0.0363309	7.81015	2.86302	0.586077	7.69872	1.91977	0.425874	0.525206	0.254993	0.0949432	29.3453	2.57308	0.4275	139.251	6.38753	0.357834	231.033	7.46358	0.212385	405.008	10.496	0.224286	83.4654	3.07548	0.0590226	11657.3	217.489	0.238128	331.872	148.731	287.349
181 - 7.d	30	BelowLOD	234.033	694.637	137.911	85.6297	2.22367	471615	8732.46	0.676089	0.0947217	0.0686239	0.07978	1.69223	0.331871	0.0733397	0.0788369	0.0399421	0.0254622	2.46842	0.717532	0.586553	5.79213	1.04836	0.432934	0.192667	0.0875944	0.0720926	31.0882	2.10755	0.281991	141.265	4.64304	0.236874	212.231	5.84597	0.0982612	357.722	10.8358	0.189253	70.92	2.74813	0.0294288	11245.7	149.226	0.126022	BelowLOD	100.232	220.657
181 - 8.d	30	BelowLOD	286.745	703.672	13.8101	2.54347	3.02343	476107	8222.75	0.277251	BelowLOD	0.0267138	0.0557821	15.8885	0.759402	0.0855127	0.0680132	0.03515	0.0308229	2.13164	0.637741	0.340155	3.44215	0.772364	0.211985	1.36572	0.23267	0.0672318	17.8213	1.6298	0.252767	82.562	2.64204	0.119894	158.438	3.23242	0.171716	323.382	5.42119	0.132529	72.4161	1.51361	0.0297602	7483.17	77.8652	0.206058	BelowLOD	77.9402	206.585
181 - 9.d	30	BelowLOD	363.48	690.964	6.3767	2.05815	3.08592	463695	7817.22	1.0864	0.967677	0.230636	0.0502894	15.6308	2.21306	0.0803355	0.911009	0.185115	0.0292937	14.6689	2.38789	0.16196	10.578	1.48916	0.131746	1.34108	0.316812	0.0640808	42.9958	2.67993	0.319965	196.819	7.2007	0.173837	283.205	12.7211	0.150832	474.317	24.8575	0.30839	92.9571	4.8137	0.0584392	11671.2	123.157	0.115791	210.81	117.936	177.118
181 - 10.d	30	BelowLOD	302.501	854.804	13.1087	3.03885	4.18855	474176	8416.59	0.526157	0.192127	0.0778433	0.0346452	11.7293	0.570639	0.0648968	0.107735	0.047303	0.0144444	4.27991	1.03804	0.60105	5.11974	1.03321	0.412768	1.66009	0.2607	0.0696383	29.2216	2.21933	0.294344	112.012	4.68903	0.184904	192.018	5.78716	0.117382	353.18	8.97617	0.222621	75.6366	1.69661	0.0397165	8888.9	98.0112	0.138526	296.071	107.939	229.894
181 - 11.d	24.5446	BelowLOD	241.488	739.27	28.0599	7.09504	4.17328	480571	8515.87	0.767362	0.0567035	0.0397853	0.0389523	13.2517	0.795654	0.0747949	0.248947	0.0688718	0.0404991	5.10781	0.883418	0.462208	6.35704	1.11019	0.673038	1.2087	0.228024	0.076768	32.0761	3.5183	0.207982	112.645	9.81961	0.11115	172.098	11.5229	0.10113	287.153	15.3844	0.206937	59.2781	3.42275	0.0405295	8962.11	86.8431	0.218336	BelowLOD	94.5484	228.139
181 - 12.d	30	2542.88	959.478	730.851	13.8154	4.06142	4.16096	478393	10173	0.698536	11.5042	4.51586	0.0748971	49.0653	13.908	0.0630857	3.05836	1.30318	0.0318519	33.4993	13.4501	0.352445	6.52357	2.10663	0.0652326	0.838969	0.201824	0.119297	19.7831	2.49193	0.244842	66.6627	2.38269	0.158481	108.342	2.6021	0.0397036	198.792	4.93261	0.148808	40.8669	0.870255	0.0528122	9918.31	154.246	0.229467	BelowLOD	105.55	286.674
181 - 13.d	30	BelowLOD	301.021	773.9	16.838	6.03791	4.85586	473793	8116.05	0.391292	BelowLOD	0.0194907	0.0705124	8.79989	0.64152	0.055171	0.0453868	0.0274004	0.0256938	2.17404	0.685966	0.501935	4.49592	0.721664	0.442558	0.710821	0.158601	0.0944136	24.0854	2.29865	0.241293	96.7453	7.88927	0.272787	156.594	11.8424	0.125396	270.401	16.9694	0.273714	56.7486	3.56487	0.0385541	10134.9	98.063	0.0462585	BelowLOD	86.9157	320.084
181 - 14.d	30	BelowLOD	317.074	646.583	30.1114	5.13069	4.62841	469163	9657.01	0.860001	BelowLOD	0.0338041	0.028285	2.84127	0.338374	0.0401145	0.170065	0.0473898	0.0303547	5.63634	1.27368	0.458278	8.40873	1.33724	0.385651	0.743309	0.160935	0.105711	39.5482	2.28876	0.297326	156.428	4.48497	0.0964406	240.678	7.92311	0.128729	401.582	15.1006	0.181422	78.3383	2.41076	0.0383012	10173.7	108.769	0.178247	BelowLOD	77.9671	259.056
181 - 15.d	30	BelowLOD	267.966	776.153	24.4384	4.2602	4.9193	468522	8968.93	0.540337	BelowLOD	0.013941	0.0362713	1.38122	0.168683	0.0599846	BelowLOD	0.031293	0.0481752	1.9892	0.606167	0.538604	7.1056	1.10332	0.363787	0.202748	0.0996528	0.095549	39.7139	2.54339	0.265112	165.81	5.10493	0.276557	246.317	7.38818	0.110901	407.61	15.813	0.282533	78.452	3.0996	0.0557104	11476.2	94.8448	0.107274	BelowLOD	81.3258	226.922
181 - 16.d	30	BelowLOD	278.389	800.754	47.7092	7.49813	5.32163	473949	7566.59	0.388361	BelowLOD	0.000306591	0.0449471	2.0484	0.262756	0.0650079	0.106151	0.0506069	0.00564414	4.55584	0.921932	0.151717	6.83554	1.05271	0.440524	0.580621	0.136831	0.0754156	29.1082	1.75705	0.247122	98.3385	3.11424	0.200087	149.212	3.35575	0.116638	257.008	5.57697	0.218926	51.3825	1.20645	0.0542027	9217.23	121.825	0.143589	BelowLOD	102.871	269.181
181 - 17.d	25.9246	BelowLOD	254.758	973.252	16.8477	6.44994	5.33245	484212	7935.81	0.511809	0.112105	0.0737362	0.0495675	15.9624	1.13532	0.0572855	0.233971	0.0902924	0.0364952	3.34992	0.926723	0.150322	4.65062	1.05909	0.338424	0.942883	0.226389	0.109088	25.9739	2.98245	0.39132	100.035	6.94864	0.22657	162.622	10.1046	0.138855	285.488	15.5908	0.129949	57.9785	2.82739	0.0580581	9809.57	118.745	0.172392	BelowLOD	100.62	280.746
181 - 18.d	30	BelowLOD	310.16	746.535	16.4115	3.80313	6.57084	475362	8327.09	0.672656	BelowLOD	0.0266432	0.0537682	1.56364	0.282583	0.0475279	0.0958559	0.0465782	0.0507014	3.81554	0.937925	0.550704	5.68719	1.08962	0.171598	0.434251	0.150316	0.0932695	31.1846	2.57171	0.218961	122.118	6.03773	0.134159	159.541	9.55153	0.0843052	252.812	15.9585	0.0832641	49.7939	3.15127	0.0324678	11642	156.243	0.165989	BelowLOD	102.436	291.772
181 - 19.d	30	BelowLOD	293.728	752.324	39.286	9.1748	6.09239	485089	6969.03	0.282155	0.476798	0.122543	0.0566118	7.32368	0.48628	0.0438208	0.403473	0.085829	0.0376767	7.6932	1.4197	0.30535	8.71728	1.51101	0.272017	0.502217	0.147927	0.101764	45.1177	1.82816	0.297816	177.675	4.64007	0.171683	280.117	7.94004	0.121811	497.037	12.6412	0.290074	95.8607	2.65241	0.0299539	10175.2	111.194	0.212648	BelowLOD	91.7509	279.609
181 - 20.d	30	BelowLOD	315.649	749.214	12.1846	4.40679	4.56033	475912	9987.16	0.436793	BelowLOD	0.000849886	0.0333578	5.22083	0.450694	0.0668161	0.0876361	0.0502845	0.02451	3.29183	0.894765	0.448205	5.30329	1.00267	0.359752	0.490046	0.139534	0.125882	33.7506	3.20302	0.401161	147.878	7.73712	0.236171	248.433	11.9617	0.111517	450.77	21.1366	0.142961	90.6353	4.18531	0.0269077	11445.1	132.711	0.192979	BelowLOD	86.8835	353.975
181 - 21.d	30	BelowLOD	281.72	864.653	30.3971	6.86695	7.61521	476371	7509.47	0.713831	0.223471	0.0845749	0.0334684	2.15754	0.373322	0.0730786	0.205913	0.0789806	0.0628277	3.09605	0.817125	0.548663	4.62607	0.994495	0.485967	0.200126	0.0963555	0.0725361	33.0402	1.74376	0.186104	138.416	6.05343	0.159602	178.956	7.52345	0.190188	291.317	11.989	0.29111	55.4582	1.98371	0.051039	11864.2	147.689	0.28443	BelowLOD	111.856	311.817
181 - 22.d	30	BelowLOD	290.867	717.526	62.056	7.45587	5.17408	473935	9249.56	0.714959	BelowLOD	0.0131615	0.085596	2.22891	0.297853	0.0452467	0.245979	0.0928048	0.0551032	5.20361	1.03272	0.611866	13.2194	2.08771	0.478677	0.433184	0.136673	0.0660243	58.9136	5.38652	0.288872	214.644	13.8545	0.201228	308.237	17.4401	0.0783023	509.855	22.7773	0.209082	98.7056	3.84657	0.0360252	10567.6	96.5546	0.127205	BelowLOD	103.848	330.13
181 - 23.d	30	BelowLOD	353.542	670.997	15.019	5.15491	7.0984	477188	7082.36	0.525588	BelowLOD	0.0216926	0.088995	2.41996	0.387506	0.0727067	0.202645	0.078882	0.0435765	3.05537	0.819061	0.264292	6.32568	1.01025	0.124753	0.476724	0.159412	0.12105	41.2525	3.60071	0.460447	150.547	11.3171	0.0960958	195.954	20.5219	0.142347	310.546	35.5856	0.219586	57.5958	6.99991	0.0634086	11982.1	206.504	0.137687	BelowLOD	104.271	335.416
181 - 24.d	30	BelowLOD	355.973	813.326	23.9277	6.3579	9.00711	478472	7731.32	0.41064	1.59943	0.471415	0.033772	16.1474	1.56009	0.0486021	1.02202	0.261088	0.0913495	8.80852	1.73391	0.577674	8.1382	1.18492	0.527225	2.1515	0.295514	0.13287	24.7593	2.118	0.334567	91.7317	4.23137	0.174492	145.854	4.93466	0.146672	294.091	10.4305	0.195321	62.8775	2.37556	0.0434808	9530.46	110.109	0.183011	BelowLOD	113.486	319.586
181 - 25.d	30	BelowLOD	318.512	620.968	19.2883	6.29668	7.40503	471322	7180.71	0.705027	BelowLOD	0.00685638	0.028918	0.724749	0.128329	0.0761826	BelowLOD	0.0494199	0.0888797	0.473062	0.381295	0.435683	2.51463	0.645055	0.384071	BelowLOD	0.0488541	0.0845173	18.7167	1.40786	0.205046	93.5065	2.68302	0.290764	139.5	3.37277	0.113659	245.086	5.78634	0.241588	46.8459	1.17866	0.0386598	12432	91.1663	0.147377	BelowLOD	73.4618	306.4
444
444 - 1.d	30	BelowLOD	301.179	1043.75	48.054	11.0422	9.13926	478733	8345.53	0.720797	BelowLOD	0.00757435	0.0628571	6.74374	0.462542	0.0200775	BelowLOD	0.076092	0.0979308	1.84195	0.631771	0.508874	5.09627	0.944495	0.572737	0.602103	0.154178	0.114953	24.7388	1.95809	0.222359	88.7617	3.04484	0.176812	140.008	3.04735	0.181381	251.689	5.83011	0.225232	50.3111	1.20333	0.0441756	10051.8	177.052	0.189632	BelowLOD	87.2058	366.104
444 - 2.d	30	BelowLOD	352.143	739.815	10.4789	6.76203	9.81273	479221	10515.4	0.813237	0.338568	0.091292	0.0938602	2.28917	0.302736	0.0721715	0.710438	0.245855	0.322035	2.72731	0.823441	0.49675	3.43427	0.790061	0.325094	0.155494	0.0932069	0.0355775	30.6952	2.07833	0.294963	208.497	3.98452	0.170535	428.42	6.74509	0.107527	938.701	10.8008	0.194433	190.327	2.35844	0.0566999	12866.6	155.227	0.0967579	BelowLOD	98.0143	282.554
444 - 3.d	14.747	BelowLOD	560.413	1168.49	189.95	49.5187	11.57	496629	13041.9	0.839263	0.435166	0.156472	0.0563294	1.77141	0.44212	0.0564637	0.501847	0.328515	0.137141	2.76506	1.1552	0.743127	2.57364	1.14723	0.806125	BelowLOD	0.110068	0.209105	25.3684	2.9704	0.312976	179.653	5.74569	0.183743	373.802	12.4603	0.116178	794.711	27.8057	0.331723	163.69	6.24912	0.0864491	12518.1	264.34	0.273126	482.525	211.568	328.205
444 - 4.d	17.6449	BelowLOD	507.421	984.01	89.0031	22.6472	11.5694	508272	7843.84	0.562724	0.146406	0.0862643	0.0121499	3.49733	0.384223	0.0572351	1.20498	0.507553	0.234164	3.65191	1.13127	0.589977	2.9714	0.894537	0.493554	0.303339	0.173001	0.101947	33.5105	2.70577	0.450425	178.065	7.67546	0.314485	349.445	9.54476	0.168966	710.949	16.6685	0.31118	144.166	3.51917	0.0546788	11276.3	249.826	0.189758	BelowLOD	124.254	309.066
444 - 5.d	17.2769	BelowLOD	429.877	976.935	26.3675	10.5588	10.9295	488541	10234.7	0.659798	0.347726	0.13366	0.0232008	8.42877	1.35173	0.0717801	2.36869	0.925245	0.254001	6.78896	2.04966	0.654059	11.783	2.26479	0.724594	1.06784	0.322433	0.155814	57.8006	5.89254	0.446223	242.207	16.1499	0.0732577	415.125	24.7611	0.242266	772.903	35.6608	0.265123	153.977	7.09301	0.00921375	10817.9	163.867	0.14558	BelowLOD	143.147	320.309
444 - 6.d	30	BelowLOD	296.415	725.538	45.0132	9.91012	8.77124	486674	8429.58	0.440837	0.270036	0.0750983	0.0598822	3.27145	0.261835	0.0734098	BelowLOD	0.23946	inf	3.03333	0.823745	0.164113	5.31334	0.913012	0.222765	0.176846	0.098211	0.153106	30.2924	1.55944	0.23444	163.531	4.52582	0.21343	295.689	4.96891	0.118623	600.298	10.0749	0.265786	116.581	2.06705	0.0462022	11203.6	191.525	0.125423	BelowLOD	51.4906	160.864
444 - 7.d	30	BelowLOD	244.818	601.887	18.7991	5.81778	8.62495	468998	8968.93	0.450914	BelowLOD	0.0182991	0.00808461	1.58495	0.253249	0.0536658	BelowLOD	0.152249	inf	1.30282	0.491696	0.502914	3.33774	0.670897	0.312421	BelowLOD	0.0639567	0.133088	24.945	1.6313	0.0848315	144.998	3.67885	0.164805	288.847	4.99071	0.129849	612.305	10.0105	0.277678	123.793	2.24889	0.0401945	11950.5	102.644	0.0941093	110.561	49.3092	105.63
444 - 8.d	30	BelowLOD	329.514	703.93	61.0982	10.2675	7.07443	472817	8127.49	0.495859	BelowLOD	0.0204984	0.0738044	2.05165	0.216707	0.087223	BelowLOD	0.115731	inf	2.0237	0.588027	0.321394	3.68984	0.796789	0.524012	0.122366	0.0852823	0.0781655	28.951	1.79454	0.206872	119.635	4.06087	0.173379	199.725	5.44964	0.0913547	390.709	11.6572	0.136553	77.8146	2.47086	0.075024	10302	87.2323	0.137581	BelowLOD	42.1147	97.8591
444 - 9.d	19.0708	BelowLOD	280.74	693.086	22.6726	8.70577	9.09389	486894	7979.15	0.579807	0.581032	0.247957	0.0681626	4.22279	1.05214	0.0268566	BelowLOD	0.386494	inf	3.83062	1.36738	0.686261	3.62185	1.07591	0.480861	0.224446	0.11258	0.133453	21.9785	2.26982	0.174373	122.584	9.36514	0.0897589	234.479	15.3439	0.0740237	494.588	23.693	0.100661	105.482	3.49648	0.0264278	12247	101.937	0.115903	95.6907	49.7845	94.1295
444 - 10.d	23.4407	BelowLOD	377.595	679.41	43.6668	9.49146	7.27471	486999	6541.58	1.16423	2.75122	1.02044	0.0754122	13.1016	3.48248	0.0643807	BelowLOD	1.06714	inf	17.7852	5.13982	0.469546	10.8454	1.75748	0.515586	0.635093	0.149944	0.16815	42.6989	3.2877	0.396494	176.591	9.53333	0.15486	295.238	13.7823	0.0935917	565.09	21.1461	0.150005	112.332	4.50712	0.0307156	11802.3	125.461	0.121808	87.0611	42.2288	81.1719
444 - 11.d	30	BelowLOD	219.1	809.521	25.3597	6.50776	7.73279	477105	8702.47	0.432114	0.131364	0.0622672	0.0487083	1.65222	0.248892	0.0842397	BelowLOD	0.127846	inf	3.28832	0.814618	0.148062	4.40291	0.769634	0.617172	0.132756	0.088056	0.0739666	33.0548	1.826	0.281121	156.015	4.32883	0.113542	290.788	8.79675	0.0800015	598.998	18.9824	0.157988	119.953	3.55368	0.0530829	11300.7	89.023	0.181247	BelowLOD	29.9719	70.6551
444 - 12.d	19.3928	BelowLOD	436.422	969.111	50.9526	17.3919	8.87201	492185	8514.51	0.789788	0.666318	0.310079	0.0863995	6.36873	1.87609	0.108955	BelowLOD	0.603195	inf	8.48153	2.6066	0.758427	8.95457	1.87326	0.339448	0.612771	0.228341	0.104903	45.3291	2.87886	0.46022	202.995	5.21587	0.243599	361.641	5.7775	0.080135	745.718	13.5026	0.255427	145.115	3.17034	0.0714975	11679.3	120.65	0.180061	89.2802	39.7858	87.3522
444 - 13.d	30	BelowLOD	243.234	759.708	21.9827	5.69248	4.96599	475115	7982.23	0.637548	BelowLOD	0.00794024	0.0406851	1.19954	0.186467	0.0362974	BelowLOD	0.0444246	inf	1.27499	0.54505	0.253979	3.26063	0.769003	0.352142	BelowLOD	0.0766579	0.127037	19.4918	1.62257	0.310809	94.2608	4.22231	0.215002	177.422	6.39097	0.131143	366.023	11.0719	0.0583498	71.3756	2.28651	0.021872	11970.9	114.498	0.182089	BelowLOD	29.766	73.8774
444 - 14.d	30	BelowLOD	371.012	743.374	41.2367	8.55448	6.54468	468931	11340	0.681436	0.231996	0.0829748	0.0196164	3.21242	0.313268	0.0707322	BelowLOD	0.124826	inf	6.82621	1.49133	0.392933	8.08028	1.32646	0.435967	0.425137	0.177454	0.16095	52.9352	3.02253	0.368077	203.905	5.83367	0.205141	286.839	9.42801	0.103516	498.017	21.0054	0.285066	94.1935	4.21623	0.0711107	10298.4	115.647	0.212958	95.1355	48.4917	69.2115
444 - 15.d	30	BelowLOD	260.502	568.778	9.38344	3.72635	7.39022	475340	10385.7	0.535419	0.18085	0.0717482	0.0391025	1.73781	0.30984	0.0676636	BelowLOD	0.0637974	inf	1.33586	0.457786	0.423858	3.12828	0.716254	0.0585168	BelowLOD	0.0867886	0.106007	22.7235	1.77407	0.323041	154.35	4.28913	0.143914	321.691	7.15905	0.107344	710.955	18.3865	0.13503	143.518	3.92167	0.0431529	13285.2	151.216	0.0597588	BelowLOD	27.2797	67.3605
444 - 16.d	30	BelowLOD	298.418	775.795	13.5888	3.77114	4.44418	474790	10159.5	0.684412	BelowLOD	0.00047897	0.0542683	3.52226	0.273934	0.0402008	BelowLOD	0.0132541	inf	1.20095	0.497253	0.353578	2.00725	0.586855	0.33622	0.102965	0.0833933	0.087595	14.6044	1.2838	0.224239	71.0292	2.67512	0.083859	131.208	5.34307	0.0854421	273.134	11.7304	0.163854	55.0787	2.35713	0.0367644	11521	80.3549	0.186982	BelowLOD	20.636	52.385
444 - 17.d	30	BelowLOD	310.319	760.334	8.17136	2.93149	5.30812	470898	7243.07	0.57632	0.496913	0.230072	0.0468233	3.57881	1.00601	0.094555	BelowLOD	0.169223	inf	3.27034	1.23723	0.470892	2.98657	0.820649	0.317687	0.288335	0.115813	0.0400883	20.7005	1.90578	0.279024	129.526	5.05599	0.140238	234.446	6.15126	0.0883942	503.495	11.2636	0.133112	100.582	2.89626	0.0421898	14090.3	94.8694	0.139848	BelowLOD	21.9547	62.3679
444 - 18.d	30	BelowLOD	346.479	950.444	19.6083	4.50061	5.16992	486445	7581.78	0.107875	0.175136	0.0678394	0.0554274	2.88767	0.314422	0.0599361	BelowLOD	0.0593656	inf	3.2101	0.867639	0.64127	6.02749	1.27822	0.379685	0.34411	0.125984	0.130546	38.34	3.37531	0.289362	180.061	7.13345	0.230884	329.299	10.0508	0.0920507	673.829	17.1503	0.259945	131.428	3.44654	0.053122	11579.8	114.134	0.216248	BelowLOD	20.1201	47.4674
444 - 19.d	23.8086	BelowLOD	528.645	765.124	34.8214	8.00083	5.89961	469367	7229.7	0.474226	18.7504	2.9583	0.0342193	69.5372	10.4835	0.050309	BelowLOD	1.60674	inf	78.6064	14.5817	0.446434	23.0165	4.40679	0.599794	2.36362	0.580059	0.037036	50.5031	6.41904	0.153764	207.194	13.6641	0.26891	380.288	16.2326	0.137525	799.559	35.3333	0.173494	160.456	5.60271	0.0605521	12056.3	168.365	0.198746	124.242	39.3753	61.4141
444 - 20.d	30	BelowLOD	326.015	992.937	274.164	35.6778	4.98536	468268	7794.72	0.599472	1.3412	0.200704	0.0671006	5.45674	0.369641	0.0673674	BelowLOD	0.118894	inf	5.7113	1.00573	0.0778959	3.62707	0.825157	0.342119	0.190843	0.083249	0.0937908	29.1367	2.05061	0.0461711	159.419	3.73553	0.229122	325.511	4.14069	0.22834	706.03	10.0636	0.214389	141.256	1.85138	0.0635989	12299.1	133.954	0.250404	BelowLOD	22.7276	45.7897
444 - 21.d	19.0248	BelowLOD	253.743	623.82	11.3709	2.66183	4.24602	493308	11139.3	0.611761	0.175295	0.120367	0.0425089	4.62587	0.522783	0.0587715	BelowLOD	0.0580553	inf	4.13808	0.940695	0.499634	6.10395	1.25035	0.446095	0.385793	0.139859	0.101461	33.5791	2.07661	0.313298	133.131	4.57557	0.184151	227.144	6.13728	0.186856	439.321	10.3815	0.0584893	85.3013	2.776	0.0442331	10332.5	120.979	0.107919	BelowLOD	18.9579	44.4551
444 - 22.d	30	BelowLOD	292.786	568.878	8.73159	2.87706	4.25524	469361	9947.68	0.504123	BelowLOD	0.0238616	0.0368714	1.14922	0.150975	0.0718998	BelowLOD	0.0102031	inf	0.589163	0.380201	0.477849	2.19006	0.520527	0.351383	BelowLOD	0.0380393	0.0943432	20.1086	1.3799	0.241502	113.65	5.14114	0.267256	225.413	10.0249	0.0608413	479.283	24.6539	0.170619	97.2642	5.16425	0.0339946	12449.7	102.257	0.121114	BelowLOD	17.1382	42.0213
444 - 23.d	30	BelowLOD	333.413	595.152	19.5752	3.45961	4.61909	470846	9315.62	0.187827	BelowLOD	0.0359696	0.0576833	1.98459	0.18229	0.0416919	BelowLOD	0.040841	inf	3.7915	0.803685	0.368423	8.57906	1.23554	0.294518	0.2408	0.118397	0.124622	45.5933	3.1604	0.0431627	157.95	6.19618	0.103821	246.905	6.22562	0.133135	454.785	10.9162	0.198005	87.005	2.10531	0.0546318	10586.2	99.9165	0.140892	BelowLOD	15.2789	34.0779
444 - 24.d	30	BelowLOD	260.759	839.036	22.1862	3.81923	3.58291	473924	8842.56	0.910051	BelowLOD	0.000842672	0.0473574	16.8208	0.989612	0.0383241	BelowLOD	0.036874	inf	3.49104	0.75659	0.501374	3.76562	0.736604	0.114267	0.95415	0.197508	0.113437	19.5984	1.65251	0.281135	67.4051	2.29011	0.12041	113.657	2.62196	0.120291	242.018	6.68327	0.255166	50.7759	1.50594	0.0474726	11588.6	95.2865	0.13105	BelowLOD	18.7045	37.6979
444 - 25.d	26.3845	BelowLOD	386.549	766.883	14.1448	5.02235	4.42321	483935	8366.72	1.09893	0.553163	0.25363	0.0568448	5.11616	1.44807	0.0110919	BelowLOD	0.29666	inf	8.37159	2.4644	0.180462	9.31072	1.76567	0.320212	0.601693	0.220083	0.123534	46.6105	4.75613	0.315639	151.936	14.0537	0.188365	178.242	16.7916	0.127589	290.13	28.6199	0.098005	54.5496	5.30277	0.0642508	11915.5	181.776	0.138533	60.7017	34.1634	47.694
9088
9088 - 1.d	11.9411	33649.6	14882.6	1208.9	1057.88	211.83	5.11223	419219	20330	2.21836	152.006	50.8647	0.0645593	576.349	144.963	0.135149	95.9117	25.2188	0.116286	689.531	166.996	1.01866	200.486	23.0859	0.824577	42.1737	3.28357	0.0918898	223.055	15.834	0.551554	359.253	29.3771	0.341952	333.159	18.0037	0.0358252	521.962	24.2981	0.112362	100.631	3.14074	0.0831154	8027.17	117.343	0.12563	741.355	314.91	360.079
9088 - 2.d	30	4298.27	1295.23	1219.64	53.2498	7.76101	4.67392	466227	9450.18	0.837491	38.1242	10.5969	0.101433	176.785	28.8584	0.0158271	23.8155	4.14581	0.0561462	209.793	23.5934	0.623036	92.1452	5.96485	0.630688	24.805	1.26077	0.110682	141.601	6.03529	0.151844	287.21	7.38469	0.280164	315.609	6.11304	0.291659	530.693	11.923	0.266858	104.131	2.07737	0.0680209	7545.63	62.0913	0.483171	BelowLOD	380.515	469.875
9088 - 3.d	30	3154.05	1172.36	722.441	163.597	16.7511	4.64913	438931	6770.86	1.02836	17.3627	4.29043	0.0609487	111.668	15.1034	0.065585	13.2489	2.14219	0.102761	119.935	16.3892	0.776291	59.5223	5.60074	0.432914	16.2367	1.19878	0.0535655	95.8451	6.70606	0.104228	229.475	10.7231	0.25309	284.594	9.87023	0.165832	524.731	15.1955	0.311582	103.814	3.03585	0.0428907	8543.17	94.0771	0.0731556	1234.33	621.613	730.9
9088 - 4.d	22.3367	1396.25	673.508	825.976	96.8371	19.3726	4.52404	459706	9604.32	0.735732	5.6052	1.10808	0.0516797	100.947	5.6692	0.0632928	13.4348	1.15062	0.11236	145.636	12.379	0.367152	105.66	8.78785	0.512073	29.9278	2.32041	0.181728	151.347	8.83506	0.583013	291.719	12.9339	0.323737	283.817	10.2434	0.1305	454.902	10.1593	0.400406	85.1381	2.21668	0.0463348	9993.83	215.438	0.206969	BelowLOD	1413.62	32498
9088 - 5.d	22.8427	BelowLOD	714.31	1114.86	1003.89	410.718	6.34148	415441	26212.2	0.66761	3.56297	0.48234	0.0850832	118.012	13.2402	0.231841	21.2548	3.39252	0.0431115	251.021	38.7875	0.710826	173.632	33.5047	0.673912	43.1813	6.28771	0.15835	245.372	35.4658	0.376355	443.827	64.3902	0.394622	371.405	42.1731	0.205183	551.128	47.4425	0.180438	97.5551	6.72667	0.0523784	8949.68	180.893	0.344031	BelowLOD	2278.03	inf
9088 - 6.d	30	BelowLOD	558.264	1440.92	123.702	14.3243	7.63379	454561	9642.29	1.04541	1.89639	0.322656	0.039489	46.3971	1.67714	0.0964326	5.15356	0.504838	0.103275	73.1142	4.66677	1.06102	52.5601	4.07569	0.584075	14.925	1.13396	0.0961744	89.7375	5.85989	0.382384	173.604	7.99253	0.384619	188.988	4.99138	0.0622662	315.593	9.03951	0.256229	61.9337	1.72683	0.104687	7878.12	72.2908	0.217166	BelowLOD	243.678	inf
9088 - 7.d	30	BelowLOD	306.583	611.113	101.972	17.1983	3.7733	460465	6322.56	0.62154	1.38767	0.23613	0.0404174	42.216	1.71755	0.0678657	3.97726	0.380252	0.0693284	47.8122	4.06366	0.421277	38.3913	2.3459	0.381104	10.9005	0.681816	0.124072	67.1732	4.13253	0.433803	156.134	5.19173	0.128612	198.091	4.25829	0.0954758	344.91	6.4848	0.320972	68.4601	1.57879	0.0464779	8206.2	108.084	0.187447	BelowLOD	129.329	inf
9088 - 8.d	30	BelowLOD	426.528	1035.74	218.899	48.6828	4.19424	469601	8311.91	0.793885	5.51189	0.752244	0.0655989	65.4017	3.12076	0.0928001	6.27596	0.605805	0.0783606	74.9227	6.75483	0.503499	41.7703	3.40133	0.603844	13.6281	1.37499	0.0366931	80.0067	5.56358	0.291422	171.63	8.8104	0.161599	190.023	4.04659	0.114355	330.294	6.91303	0.0385515	66.2295	1.25722	0.0537238	8693.71	114.522	0.178634	BelowLOD	117.911	inf
9088 - 9.d	30	BelowLOD	315.134	693.703	295.349	45.2978	4.42844	461311	6268.95	0.40525	1.54062	0.171888	0.0679471	51.1098	2.03217	0.0195817	6.03097	0.420517	0.0683673	85.2025	5.99628	0.479198	66.6689	4.15606	0.336909	19.8677	1.27723	0.0652958	101.218	5.01201	0.188168	198.98	7.47524	0.178155	205.276	5.22536	0.0760676	328.71	7.09166	0.212661	64.5683	1.24217	0.0597972	7573.53	80.7565	0.155626	BelowLOD	56.4491	inf
9088 - 10.d	30	5589.62	1239.68	740.459	85.3785	11.4957	4.58449	474571	7611.07	0.606707	30.374	6.05217	0.0187007	141.76	20.432	0.0624483	16.8599	3.15227	0.0750013	146.839	27.8176	0.495448	58.6053	11.016	0.501476	13.8545	2.54287	0.0610281	90.154	12.4149	0.362625	180.513	16.8445	0.184525	208.499	9.12878	0.169166	368.721	9.41611	0.201242	72.8983	1.57515	0.0358409	8849.59	158.299	0.161263	BelowLOD	56.191	inf
9088 - 11.d	30	8411.36	1949.09	695.041	50.1141	4.19679	3.54484	470444	7833.54	0.984292	37.4013	7.62426	0.0635046	135.279	23.7051	0.0792069	14.4077	2.90683	0.0748553	114.119	23.1571	0.467771	24.5849	3.77686	0.549574	5.66289	0.632183	0.0490676	41.198	3.35198	0.133072	123.056	6.35316	0.200674	202.558	7.45544	0.160236	375.349	13.6991	0.240476	76.5778	2.35454	0.0449135	6748.22	48.5232	0.140384	BelowLOD	44.5078	inf
9088 - 12.d	19.5308	BelowLOD	537.671	764.298	288.54	76.1017	4.2239	469684	10693.2	0.580096	2.30067	0.549641	0.0500599	71.0995	7.64616	0.111443	8.47062	1.7843	0.086518	108.909	22.8841	0.399156	80.0398	16.2152	0.5403	21.1909	3.97842	0.0632535	134.513	20.9815	0.342838	271.924	32.7631	0.484184	291.833	18.6034	0.11579	485.578	24.2699	0.184427	92.4493	3.08202	0.0521143	8777.86	167.164	0.251785	BelowLOD	54.2366	inf
9088 - 13.d	30	4493.5	2221.98	714.048	208.841	57.657	3.89149	456943	10010.3	0.48309	22.6092	10.8202	0.0416779	117.608	34.6106	0.0467547	13.4858	4.63821	0.0961858	149.179	44.6549	0.431997	63.6609	15.2543	0.59849	16.7918	3.96954	0.116665	97.4674	16.6939	0.383102	193.038	21.1942	0.170366	225.847	14.1515	0.171506	394.286	16.258	0.185937	80.095	3.50312	0.0467268	8674.83	127.651	0.211655	BelowLOD	36.8716	inf
9088 - 14.d	30	BelowLOD	352.094	580.929	51.0733	7.38512	4.8033	470283	7806.63	0.690484	2.12112	0.378224	0.0328174	47.566	1.85634	0.0880573	4.38591	0.425597	0.0879554	57.2019	5.46977	0.148017	39.8838	3.48058	0.307335	12.8726	1.29875	0.0997207	72.0938	5.03401	0.31298	156.281	8.83534	0.213356	161.048	5.58033	0.146261	287.658	9.20389	0.244633	57.5977	1.59982	0.0205171	9030.8	157.245	0.128272	BelowLOD	45.4623	inf
9088 - 15.d	16.9089	BelowLOD	649.636	1137.2	71.5921	11.602	7.44173	484117	10708.7	0.437336	2.50302	0.436621	0.0377126	67.9915	2.73573	0.0613415	4.64471	0.581055	0.0867829	61.3294	6.67828	0.100806	55.427	6.991	0.590438	17.6622	1.98146	0.147275	93.4047	9.38553	0.241433	236.726	13.3233	0.0414999	296.532	12.5691	0.178943	498.26	14.0739	0.0889244	105.299	2.56218	0.0549317	7587.65	135.161	0.183893	BelowLOD	59.4285	inf
9088 - 16.d	30	BelowLOD	357.656	802.351	438.156	52.3608	6.26621	459960	11339.4	0.873991	1.76269	0.263503	0.0385489	63.2059	3.61623	0.0809136	6.47184	0.821295	0.137128	84.0655	10.3253	0.532562	67.1871	7.76843	0.521485	18.4463	2.20438	0.152736	101.989	10.5674	0.370157	220.713	16.9893	0.212361	237.294	7.92811	0.167805	408.274	9.1767	0.174751	84.1058	1.52205	0.05343	8920.4	94.7447	0.250504	BelowLOD	55.4121	inf
9088 - 17.d	30	6502.9	3918.41	862.292	162.505	29.6395	6.47461	447620	7221.11	0.795233	40.9892	21.7902	0.120664	218.488	81.9666	0.0929495	30.7693	12.7557	0.163582	215.676	73.7819	0.334787	95.7353	14.2349	0.665732	23.0153	2.02724	0.110204	140.086	13.586	0.17073	261.264	14.8264	0.337011	283.39	10.437	0.095968	474.842	15.3774	0.245265	95.2909	3.1015	0.059087	8638.26	103.183	0.237944	BelowLOD	49.7521	inf
9088 - 18.d	30	4959.51	1846.44	1234.32	282.064	35.5808	6.4021	427188	10188.6	1.10558	36.1507	9.90214	0.139006	213.373	47.8537	0.239068	24.4208	5.35828	0.276083	203.579	43.5206	1.16311	93.6515	13.8625	0.734608	23.8069	3.03248	0.156225	139.433	16.0952	0.497937	256.81	18.4144	0.215124	263.146	12.3779	0.252573	425.642	12.5076	0.30701	84.1556	2.14715	0.109069	8382.87	89.35	0.316718	BelowLOD	61.2781	inf
9088 - 19.d	30	9903.08	2130.57	888.024	212.467	57.9997	4.62733	457439	9023.2	0.482138	56.6809	10.7159	0.0581242	241.46	37.9938	0.0465286	29.7599	5.32116	0.152819	225.609	39.1164	0.349692	83.889	14.3604	0.263827	18.2172	3.17171	0.0708238	109.388	15.8997	0.297337	218.169	24.5175	0.0337743	237.514	15.1484	0.0636006	408.402	19.3365	0.227978	81.6092	2.9043	0.0559692	9001.71	136.905	0.185892	BelowLOD	65.3209	inf
9088 - 20.d	30	BelowLOD	282.76	698.104	174.046	36.8576	5.28814	471683	9514.25	0.101078	1.72247	0.322326	0.0289913	62.4385	4.05897	0.0095099	5.77905	0.684169	0.144349	66.7427	8.03548	0.450047	57.6026	5.52392	0.174236	17.185	1.54234	0.0732292	98.389	6.16985	0.179227	236.894	8.3897	0.0531294	276.8	6.47867	0.0993898	488.673	9.349	0.112873	99.4841	2.00398	0.0507937	8671.48	121.296	0.167854	BelowLOD	29.436	inf
9088 - 21.d	19.2088	7066.07	2089.24	960.932	106.003	17.8365	5.29114	475704	11505.1	0.833957	22.3955	4.67828	0.0540036	127.844	18.1914	0.0608465	17.505	3.30097	0.233985	152.393	24.5167	0.543705	98.6512	12.3581	0.562589	22.0695	2.69534	0.133603	146.974	17.7605	0.501896	295.381	22.7021	0.25879	300.611	13.7362	0.164616	487.183	12.3829	0.30835	99.126	2.98222	0.0484642	7861.1	120.562	0.0955787	BelowLOD	75.7349	inf
9088 - 22.d	30	2794.78	756.529	900.257	300.755	42.3597	5.01143	443141	6673.7	0.621908	18.449	4.68652	0.0782707	125.914	14.6344	0.0874771	11.7999	1.98641	0.0959012	89.8416	12.0835	0.327292	47.8143	3.29303	0.460075	10.2511	0.591263	0.0863144	73.6565	3.21054	0.534949	175.05	4.51275	0.0319188	201.109	4.83979	0.137286	374.081	6.27076	0.176835	79.7561	1.69724	0.0422526	10267.4	136.368	0.0766801	BelowLOD	50.6709	inf
9088 - 23.d	30	BelowLOD	576.469	955.804	481.272	56.9859	7.91008	360830	8896.63	0.803786	3.52927	0.641355	0.0380977	78.1347	4.71598	0.0947181	10.9297	1.23396	0.36735	101.342	12.2451	0.415966	80.5104	9.61376	0.723529	23.9024	2.80225	0.176057	123.923	12.0723	0.855113	238.673	17.9692	0.177223	214.94	12.1538	0.192298	338.718	13.4477	0.387964	70.4695	2.6808	0.0567183	8685.55	99.2457	0.205706	BelowLOD	126.774	inf
9088 - 24.d	30	BelowLOD	507.931	1321.88	154.93	22.9158	7.34149	461260	10775.6	0.804163	3.52474	0.847011	0.104418	68.4513	3.17416	0.0775364	13.0483	1.49641	0.163968	90.8709	9.0243	0.169838	83.0562	8.73782	0.0873884	23.128	3.24764	0.0878937	116.157	10.9172	0.254496	237.443	16.1366	0.289029	205.494	11.3355	0.130145	344.594	15.9337	0.335948	67.0689	2.40346	0.0575283	8712.04	175.824	0.190355	1130.04	838.741	1051.7
9088 - 25.d	30	BelowLOD	503.908	981.346	137.915	14.6795	6.20352	469148	9146.65	0.831942	1.82565	0.286199	0.0378864	61.4126	2.76299	0.0418993	10.8474	1.3259	0.192467	69.1808	9.34155	0.615755	68.5071	7.87258	0.623056	20.6649	2.66461	0.0823685	106.658	10.3773	0.11907	240.878	15.4941	0.180082	245.731	6.89123	0.246715	433.331	9.16454	0.208424	89.4975	2.03718	0.0668662	7270.74	59.6144	0.145723	BelowLOD	215.907	477.456
9088 - 26.d	18.6109	BelowLOD	503.885	673.621	381.113	93.5868	5.87794	479078	8587.4	0.642763	3.75825	0.574864	0.0943965	83.4451	6.41776	0.0383902	17.4375	2.4452	0.194028	107.653	11.3957	0.540682	109.869	14.1216	0.355739	28.4756	3.43185	0.121505	146.378	13.0502	0.360535	287.415	18.9672	0.287427	246.815	10.5088	0.183863	397.028	14.2738	0.305981	78.008	2.53525	0.0675588	8560.25	194.276	0.23535	415.854	247.505	294.473
9088 - 27.d	17.0469	1513.04	743.366	1327.34	89.8317	19.4923	6.45287	490107	9060.72	0.85195	2.07283	0.488056	0.0589138	63.419	2.91762	0.0412727	8.1057	1.06109	0.270432	48.476	5.7404	0.700987	43.7101	4.71762	0.675931	12.1407	1.08534	0.112525	76.7735	4.83312	0.259011	183.256	7.50162	0.177406	222.178	6.48162	0.119658	416.249	10.5452	0.161326	84.171	2.12971	0.0798244	8543.47	192.893	0.255156	BelowLOD	99.372	163.743
9088 - 28.d	30	2491.41	885.405	955.379	202.423	29.8032	5.89166	444318	8908.16	0.833682	11.1913	2.26843	0.0499158	131.598	8.35533	0.0608157	28.4728	2.3494	0.14318	144.561	9.98886	0.418797	120.242	8.12723	0.620907	34.5568	2.4927	0.0576299	179.789	12.2525	0.0669277	354.545	16.8591	0.333418	313.675	12.1587	0.286285	523.437	16.7835	0.143805	102.398	2.4881	0.0536969	9190.61	203.939	0.238972	BelowLOD	83.6736	197.521
9088 - 29.d	30	9039.76	1438.66	772.867	91.8603	15.5776	6.36322	486467	8246.69	0.2435	53.1363	7.07498	0.0670236	219.732	22.2533	0.139941	48.0053	5.40558	0.185657	174.634	17.824	0.34766	82.5473	8.56564	0.354809	19.4863	1.81797	0.113723	122.898	11.2797	0.570103	234.623	12.6339	0.143621	239.753	7.39411	0.112175	410.349	8.11571	0.156599	84.0036	1.66415	0.0591289	8477.33	149.024	0.287257	BelowLOD	58.9162	116.647
9088 - 30.d	17.3229	BelowLOD	507.262	968.9	2939.93	509.081	5.92936	498262	9764.51	0.484739	5.02203	0.542571	0.101411	113.525	6.84668	0.0854897	33.006	3.02263	0.122126	157.284	12.2538	0.604505	139.387	13.337	0.537654	39.0089	2.86635	0.039144	205.186	15.9535	0.582417	396.844	26.8417	0.299781	325.215	14.7555	0.213107	512.129	17.2433	0.298647	96.4515	3.50775	0.0415403	9228.72	228.676	0.240546	359.183	78.4048	103.485
9119
9119 - 1.d	30	BelowLOD	416.928	788.521	14.549	2.37353	2.70345	466226	10267.5	0.877052	2.07776	0.263886	0.0831214	84.4652	2.61113	0.0709472	BelowLOD	1.24487	inf	98.9684	9.15465	0.409076	54.1868	4.81796	0.297444	14.434	1.11186	0.143642	106.343	6.02459	0.366034	293.729	10.3239	0.188649	421.858	12.4259	0.164947	741.42	17.8126	0.156248	143.721	3.40787	0.0398177	9260.69	146.854	0.0945873	130.568	25.3915	27.2764
9119 - 2.d	30	1210.22	652.274	747.804	11.07	2.07853	2.12293	475325	6179.91	0.615472	3.12874	2.07471	0.0233796	68.6094	6.00508	0.0453788	BelowLOD	1.41087	inf	39.0363	6.67764	0.550657	23.3434	2.98191	0.313972	6.53093	0.864097	0.0763188	54.905	3.85414	0.469004	188.792	5.28274	0.183687	292.03	5.12654	0.063377	544.889	10.1723	0.208448	109.455	1.69848	0.0567	9995.83	100.039	0.159882	40.014	12.9071	21.1552
9119 - 3.d	30	BelowLOD	325.871	626.908	51.8152	12.9129	2.19863	447204	14162.6	0.0964389	1.04472	0.3092	0.00839752	35.9902	1.15623	0.0472287	BelowLOD	0.246485	inf	12.4821	2.11493	0.444194	6.90085	1.09594	0.305385	2.55325	0.324176	0.0700062	30.5875	2.26753	0.256868	112.683	4.21593	0.174662	192.725	5.95269	0.114332	349.215	11.4016	0.388131	73.0625	2.1898	0.0476327	8864.02	80.9296	0.105261	29.3566	13.5889	23.5385
9119 - 4.d	3.98344	BelowLOD	557.321	1515.08	137.292	42.5377	4.71633	497360	15938.9	1.43492	0.81925	0.361802	0.101673	30.6399	7.77774	0.109608	BelowLOD	1.13748	inf	41.141	9.30318	1.23129	29.1674	4.69187	0.510306	7.45244	1.34077	0.318149	69.1707	11.2381	0.466205	207.407	13.521	0.41741	288.638	12.9196	0.246509	469.621	13.1797	0.358642	98.5093	4.72772	0.094145	8124.33	445.973	0.275888	BelowLOD	27.8687	62.2766
9119 - 5.d	30	BelowLOD	408.798	826.114	29.5318	4.84729	3.31463	456265	7368.49	0.817669	2.78776	0.353141	0.0489048	67.9325	6.50512	0.0530393	BelowLOD	3.09476	inf	134.218	17.63	0.780616	65.0996	7.88159	0.216558	26.3434	2.63758	0.14039	116.059	9.13043	0.353661	287.276	17.9007	0.14754	325.875	13.2918	0.183055	536.904	17.0074	0.304367	100.875	3.17196	0.0170457	9070.04	91.626	0.261775	139.767	38.2681	27.5735
9119 - 6.d	30	1914.31	687.25	848.63	17.4762	3.42401	3.40468	455443	8673.99	0.770701	4.31634	1.20632	0.0504607	41.8674	3.31615	0.0534649	BelowLOD	1.25202	inf	45.2528	4.63386	0.727799	24.6112	2.5105	0.34585	5.28515	0.540346	0.159938	42.459	3.08456	0.341025	124.635	4.649	0.148726	192.57	4.45471	0.207177	391.801	6.89646	0.278508	83.0894	1.62838	0.0240199	8320.25	95.4315	0.216139	50.8495	19.3401	34.7541
9119 - 7.d	24.8206	1565.07	991.22	756.089	23.5344	7.13557	3.39005	463063	11069.2	0.835937	6.32937	2.20364	0.0703157	78.9376	11.5978	0.0496683	BelowLOD	5.92558	inf	117.434	22.4995	0.402493	56.8972	8.68162	0.272838	15.7799	2.29896	0.108019	87.189	9.11594	0.367428	230.178	12.8514	0.117327	329.965	8.8498	0.22828	652.038	12.6046	0.172573	134.102	3.20013	0.0425198	8828.07	127.742	0.320442	106.55	33.5501	32.3043
9119 - 8.d	30	BelowLOD	482.59	601.527	224.405	84.1554	2.65781	455411	8461.42	0.440887	2.02577	0.492	0.0911026	43.4399	6.25277	0.0668042	BelowLOD	5.30079	inf	80.7219	19.2283	0.487	44.3715	10.0003	0.0746877	16.722	4.37315	0.117116	66.2021	12.1374	0.304643	156.766	18.1769	0.402992	195.573	13.8499	0.0622278	339.919	16.9251	0.227009	65.7844	2.70301	0.082401	9210	173.926	0.197973	135.97	35.3574	31.9994
9119 - 9.d	30	1083.86	577.546	888.375	32.1912	3.96262	3.9594	471461	11550	0.839287	1.20838	0.264829	0.0763729	48.0584	2.29008	0.11887	BelowLOD	1.83053	inf	66.3833	7.74182	0.4851	42.5507	4.29512	1.1884	15.0536	1.35614	0.0981	89.9851	5.80572	0.319974	246.442	8.14169	0.107762	324.117	5.66534	0.271745	540.156	10.6235	0.266137	106.597	1.79123	0.0471792	8599.48	92.5949	0.253476	73.8892	27.5446	32.9959
9119 - 10.d	30	7697.75	1885.23	938.301	14.4305	2.23819	3.11126	464140	7656.78	0.469631	36.647	9.0966	0.0658282	179.006	27.319	0.0212653	BelowLOD	14.7965	inf	191.834	31.5928	0.154411	54.4738	4.77336	0.0700741	12.0416	0.93589	0.0693318	101.199	5.38891	0.142912	310.006	5.87775	0.0828213	436.312	6.98122	0.145694	770.978	8.91171	0.195333	153.977	2.06344	0.0655917	8925.45	94.3969	0.144039	86.5285	23.1098	26.4639
9119 - 11.d	21.7387	16515.8	2959.83	967.054	305.39	93.4013	4.30789	424003	20844.6	0.541749	60.6951	6.73699	0.0781829	287.374	38.0106	0.0629395	BelowLOD	31.5047	inf	459.216	67.2608	0.698298	152.212	21.2062	0.311472	41.3936	5.8113	0.154258	186.663	21.045	0.351044	352.38	31.7995	0.26791	315.786	14.1102	0.163004	455.307	18.4152	0.260128	81.0574	2.26713	0.0740862	8560.42	136.695	0.272293	396.745	99.4678	40.1308
9119 - 12.d	22.8427	119547	34978.8	1350.17	77.9613	15.993	3.84067	442176	10609.2	0.909028	619.336	184.352	0.0967696	2009.33	570.212	0.134731	BelowLOD	452.538	inf	2234.43	627.492	0.636433	374.35	87.9089	0.617835	51.5111	7.24621	0.249511	338.99	63.4872	0.630982	479.386	43.086	0.537143	489.949	19.3051	0.325535	779.156	20.9892	0.642631	145.076	3.43475	0.0822505	8581.61	73.8356	0.247219	73.9728	43.6766	54.7898
9119 - 13.d	30	BelowLOD	472.144	892.708	232.116	85.0716	4.36655	425509	14539.8	53.318	78.1675	16.0094	0.117259	319.108	62.5308	0.069415	327.215	65.8692	0.332221	288.537	52.0522	0.796871	84.5472	14.091	0.371925	17.1567	2.48299	0.129097	96.2356	11.7152	0.137999	238.699	19.9153	0.0407692	277.834	15.1206	0.223889	487.84	21.4923	0.123806	97.135	3.99966	0.0199731	8360.95	111.23	0.230239	359.105	68.4918	36.905
9119 - 14.d	16.4949	747.769	680.757	728.705	396.792	154.577	3.56727	391449	53037.6	0.886808	22.1173	12.0788	0.06384	284.042	149.421	0.0877074	255.429	145.682	0.4776	369.885	200.302	0.35556	130.788	60.4843	0.47588	56.9274	26.7421	0.0875464	221.699	73.611	0.0610401	615.443	160.189	0.1945	651.416	87.7889	0.216555	1093.29	131.315	0.225902	194.744	17.9761	0.05878	9104.41	195.513	0.177608	478.206	242.992	45.6666
9119 - 15.d	18.0129	BelowLOD	965.751	1719.67	66.5893	9.86897	8.1106	443094	12912.7	0.986189	106.686	9.87643	0.124984	460.389	21.685	0.153162	336.278	21.1481	0.591853	553.736	25.6493	1.42394	199.764	12.9394	0.988948	57.7038	3.50792	0.222425	238.265	18.2066	0.464144	549.728	26.1643	0.571745	539.143	19.8417	0.246118	859.884	29.2604	0.552873	158.597	6.65477	0.105832	9305.75	107.574	0.506142	576.55	125.452	65.6833
9119 - 16.d	30	BelowLOD	300.315	619.466	17.8897	3.30915	3.6282	456577	9973.68	0.790831	1.82161	0.268969	0.0402423	74.7335	3.0027	0.096384	27.1836	2.24782	0.291664	75.4254	7.29809	0.211217	37.4514	3.60998	0.496421	9.63712	0.978011	0.0744656	70.2338	4.93133	0.300783	211.208	9.48553	0.165641	317.918	11.2971	0.0812931	643.191	17.5919	0.200603	126.736	2.85801	0.0325803	9918.48	94.9454	0.220368	136.09	28.4919	43.6395
9119 - 17.d	11.6191	1984.73	1543.66	1628.02	114.689	17.0807	8.16915	446596	14197.8	1.52585	12.5381	1.55055	0.147731	171.64	8.58583	0.148797	79.2547	9.44171	0.250835	276.704	32.9885	0.711698	139.716	19.2636	0.865447	39.8673	3.9304	0.283179	177.084	20.1452	0.97042	405.536	27.6059	0.431638	422.987	23.3269	0.383678	710.502	29.1949	0.408695	129.054	4.17674	0.100113	9611.58	102.817	0.434687	508.403	122.163	98.65
9119 - 18.d	30	BelowLOD	380.558	625.076	111.878	34.5931	2.87674	448967	6703.87	0.194553	3.46187	0.703527	0.057368	69.9715	3.47333	0.0971968	19.813	1.97853	0.132531	78.5297	8.44623	0.302187	38.0485	3.19239	0.413436	11.5765	1.08436	0.0927776	75.4767	4.53763	0.230722	208.977	11.7239	0.0554686	249.672	8.48868	0.0815956	452.755	13.5934	0.146624	84.1627	2.47011	0.0330219	9946.05	171.059	0.106722	257.692	42.7018	38.3748
9119 - 19.d	24.7286	14952.5	2250.79	897.461	31.918	5.07189	3.46964	444539	7002.88	0.617513	119.545	16.9333	0.0794163	460.963	52.6242	0.0560829	151.933	18.4183	0.155612	503.015	60.2706	0.363531	139.648	12.6596	0.150573	29.7232	2.11491	0.112025	174.303	10.7609	0.41404	409.305	22.7229	0.233707	483.45	22.8415	0.179417	790.99	33.8282	0.218606	150.957	5.96104	0.0492027	9793.97	112.533	0.135255	357.369	56.8601	57.5056
9119 - 20.d	30	BelowLOD	422.475	848.81	39.071	4.06377	3.59598	434876	9363.81	0.340547	1.80434	0.354552	0.0730988	29.4571	1.54113	0.080705	5.97418	0.80019	0.192906	31.2703	3.60839	0.441142	19.2908	1.84943	0.137788	5.28521	0.489717	0.0990174	36.5258	1.83729	0.315152	121.045	3.5984	0.0829281	167.759	5.86426	0.176742	306.117	10.5857	0.0330364	61.625	1.85023	0.0590907	8357.4	109.841	0.212431	BelowLOD	27.7953	56.5478
9119 - 21.d	30	BelowLOD	361.478	845.501	69.5365	15.3663	4.02465	446110	6597.12	0.604976	2.99422	0.335437	0.0599212	96.133	3.25274	0.0401843	18.8137	1.67668	0.160349	133.059	8.98839	0.0844417	73.5769	4.39122	0.511361	20.4801	1.52114	0.11738	101.045	5.92795	0.463122	271.205	8.39117	0.159328	339.632	8.07745	0.144418	635.237	11.6449	0.212709	117.341	2.15884	0.06122	10522.9	205.952	0.148059	301.827	68.96	88.3142
9119 - 22.d	17.9209	BelowLOD	476.706	691.526	22.0749	4.94943	3.91916	480637	12391.2	0.685345	2.18102	0.406378	0.0927111	78.3819	8.3489	0.0814475	12.6966	2.0002	0.0710596	98.5224	14.5265	0.55562	57.9187	7.76594	0.0731122	15.9053	2.38576	0.0321577	93.987	9.16848	0.0542545	284.543	23.3429	0.282538	381.881	21.4493	0.198952	721.092	37.0957	0.187873	143.755	6.98976	0.015013	10562.5	166.68	0.157438	430.929	77.3062	89.4681
9119 - 23.d	30	1241.14	673.224	796.993	64.0848	12.0107	4.81492	447460	9962.86	0.875147	16.6448	4.86222	0.0200122	110.261	18.0473	0.0397114	17.9367	3.46277	0.149248	117.623	18.2319	0.363057	49.9764	4.41796	0.471261	11.7043	0.856668	0.105649	70.7477	4.28518	0.309928	178.806	4.9171	0.214522	224.901	4.88548	0.169279	397.334	6.51988	0.184204	77.2055	1.53034	0.0511743	10050.7	115.056	0.274018	680.899	116.631	116.83
9119 - 24.d	30	1378.88	473.693	730.371	43.0951	5.89924	4.57544	451979	9224.68	0.814586	7.70463	0.876163	0.0608395	118.12	3.51348	0.0756078	21.2883	1.61571	0.112974	181.582	14.6873	0.470233	89.5634	7.89903	0.539252	21.7634	2.07392	0.132978	130.303	9.67964	0.457445	329.717	20.5996	0.188471	400.006	16.1077	0.112394	697.135	21.7298	0.179766	131.648	3.81404	0.0693649	9661.61	186.194	0.155647	562.93	129.502	137.464
9119 - 25.d	30	1281.95	485.8	721.552	177.857	68.1303	3.99661	447165	9014.16	0.675015	22.8248	2.54967	0.0708364	163.685	7.59273	0.0445031	22.9791	1.55746	0.0855549	169.927	11.683	0.575406	72.212	3.90288	0.37139	16.8479	1.32938	0.0734909	108.159	4.75318	0.416463	294.708	7.61484	0.0814599	369.792	6.4967	0.143171	644.44	12.5384	0.215341	123.495	2.14729	0.0585425	10340.4	86.2241	0.0859068	745.364	152.568	178.158
C915
C915 - 1.d	8.62925	BelowLOD	557.22	1010.32	6.97372	1.96375	2.54564	509940	10135.6	1.16506	BelowLOD	0.0433705	0.0587533	2.66367	0.260912	0.0786947	BelowLOD	0.0182632	inf	BelowLOD	0.359141	0.69637	BelowLOD	0.515867	0.69042	BelowLOD	0.0693487	0.0460378	1.98041	0.727363	0.176444	8.95985	1.32185	0.254693	19.3853	1.57132	0.122683	55.6977	5.03573	0.416501	12.0069	0.672837	0.0437483	5131.49	52.5134	0.165904	BelowLOD	41.5473	57.6562
C915 - 2.d	30	BelowLOD	373.48	934.093	4.37598	1.36944	1.82034	467542	8312.74	0.190588	BelowLOD	0.00768989	0.0537308	2.2271	0.24423	0.03426	BelowLOD	0.0735079	inf	BelowLOD	0.230059	0.47659	BelowLOD	0.26796	0.476315	0.147445	0.0693016	0.105436	2.26257	0.52012	0.378765	10.3648	0.951885	0.17494	22.1309	1.14244	0.162587	59.6146	2.10981	0.0333204	11.8327	0.544144	0.0412675	5078.88	39.273	0.269628	BelowLOD	17.7987	45.7469
C915 - 3.d	30	BelowLOD	301.518	525.474	2.2072	1.15156	1.64587	466731	8569.77	0.744493	BelowLOD	0.000781856	0.0158828	2.59601	0.237055	0.0604476	BelowLOD	0.0469354	inf	BelowLOD	0.224832	0.320775	BelowLOD	0.221991	0.251402	0.276475	0.116148	0.0764531	1.8158	0.493143	0.130206	9.77419	0.870427	0.263133	23.6802	1.20587	0.134928	66.3685	2.27091	0.123678	13.3058	0.404877	0.0874515	5084.08	43.2512	0.115057	BelowLOD	17.7766	44.1577
C915 - 4.d	17.7369	BelowLOD	410.816	906.539	BelowLOD	1.35455	2.08549	483662	11941.6	0.575657	BelowLOD	0.0136975	0.0846614	2.39785	0.307703	0.0884981	BelowLOD	0.0319987	inf	BelowLOD	0.20341	0.14821	BelowLOD	0.360715	0.479089	0.358501	0.164321	0.120809	2.20785	0.666218	0.399268	8.42594	1.10438	0.0662626	21.1321	1.04315	0.107036	57.5127	2.85591	0.163023	11.808	0.407335	0.0658637	5093.78	47.6509	0.152133	BelowLOD	20.6079	51.7938
C915 - 5.d	30	BelowLOD	449.555	931.962	4.2521	1.62652	2.49287	466042	9769.86	0.792717	BelowLOD	0.00575788	0.0543441	2.55006	0.263407	0.0348975	BelowLOD	0.0249495	inf	BelowLOD	0.0990431	0.402763	BelowLOD	0.235558	0.649381	BelowLOD	0.0657046	0.119311	1.35887	0.452746	0.607744	9.94979	0.805668	0.12141	21.6754	0.994823	0.0712626	57.0071	2.4203	0.204563	11.6674	0.49838	0.0376053	5039.43	46.909	0.185669	111.366	32.61	45.4003
C915 - 6.d	30	BelowLOD	390.899	799.352	BelowLOD	1.41976	2.77302	464716	8396.69	0.71684	BelowLOD	0.00736859	0.0864087	2.80182	0.313477	0.08303	BelowLOD	0.0332427	inf	BelowLOD	0.211223	0.193693	BelowLOD	0.26098	0.724986	0.174283	0.102137	0.0843437	1.68953	0.536574	0.228003	11.0057	0.980342	0.282086	24.7825	1.2889	0.0885655	68.8834	2.27882	0.246078	13.0691	0.571105	0.0474394	5074.1	42.5183	0.127023	BelowLOD	22.5962	53.5946
C915 - 7.d	30	BelowLOD	280.85	685.521	2.25577	1.67378	1.73716	463858	8897.35	0.805412	BelowLOD	0.00458079	0.0641678	2.55641	0.263385	0.0692287	BelowLOD	0.0425471	inf	BelowLOD	0.129664	0.136454	BelowLOD	0.152953	0.421665	BelowLOD	0.0474958	0.110183	1.97954	0.57338	0.283442	9.32195	0.805541	0.193453	21.4404	1.23741	0.0811429	56.7298	2.57246	0.214863	11.6578	0.523126	0.0420933	5159.01	45.9949	0.16576	BelowLOD	20.1622	47.967
C915 - 8.d	30	BelowLOD	289.664	768.652	BelowLOD	0.915819	2.0281	470053	8355.37	1.09637	BelowLOD	0.0188927	0.0162851	2.10765	0.209625	0.0477442	BelowLOD	0.031297	inf	BelowLOD	0.119529	0.613575	BelowLOD	0.196286	0.180339	0.244758	0.105206	0.130057	1.19738	0.389211	0.445555	9.47835	0.862073	0.204907	18.7476	0.849316	0.112519	53.4097	1.98505	0.227682	10.7931	0.383533	0.0567844	5064.59	42.6992	0.0912301	BelowLOD	21.4794	45.0005
C915 - 9.d	30	BelowLOD	264.268	690.579	3.74052	1.27667	1.61995	476062	9555.52	0.0894287	BelowLOD	0.0069058	0.0155178	2.98067	0.244787	0.0349698	BelowLOD	0.0905379	inf	BelowLOD	0.215218	0.244332	0.694312	0.334006	0.121991	0.20457	0.101289	0.118511	2.55767	0.52941	0.289165	12.6107	0.753276	0.199001	28.132	1.24694	0.0613767	77.579	2.52544	0.167207	15.5979	0.509991	0.0451642	5313.62	33.9849	0.163874	BelowLOD	18.6278	41.4499
C915 - 10.d	30	BelowLOD	250.246	708.036	3.57705	1.37597	2.03469	470733	9321.03	0.425493	BelowLOD	0.000100868	0.0346504	2.26851	0.20982	0.0390295	BelowLOD	0.0417732	inf	BelowLOD	0.139199	0.27395	BelowLOD	0.212304	0.317381	0.175934	0.0854561	0.122845	1.29381	0.368262	0.291657	8.74519	0.747011	0.183811	21.0206	1.02633	0.116736	56.9832	2.28357	0.185435	11.5932	0.411804	0.0529088	5250.29	42.3892	0.105005	BelowLOD	18.4061	44.3661
C915 - 11.d	30	BelowLOD	344.495	687.346	4.4135	1.63161	3.24962	468610	11509.7	0.679804	BelowLOD	0.0151951	0.0484468	2.12821	0.290695	0.042303	BelowLOD	0.0480484	inf	BelowLOD	0.282004	0.48282	0.554307	0.347463	0.358223	0.182727	0.102381	0.115794	1.82086	0.45666	0.416506	10.7495	0.84846	0.228805	23.9331	1.11381	0.119911	62.0617	2.09379	0.237491	12.1982	0.398355	0.0535483	5016.69	50.9887	0.116793	50.7075	30.1509	50.0489
C915 - 12.d	30	BelowLOD	255.081	614.474	BelowLOD	1.27316	2.55004	472414	9078.4	0.522203	BelowLOD	0.000394999	0.0384424	2.41686	0.226175	0.0255084	BelowLOD	0.00387617	inf	BelowLOD	0.1747	0.288289	0.40712	0.316658	0.377125	0.155595	0.084097	0.0671194	1.09807	0.338052	0.303249	9.32266	0.795054	0.245138	20.8701	1.01112	0.116376	56.9995	2.05235	0.300105	11.6944	0.390584	0.0461571	5160.18	48.5459	0.191177	54.9621	21.3563	41.2453
C915 - 13.d	30	BelowLOD	260.995	785.615	2.81669	1.24975	2.1169	470258	8947.02	0.409825	BelowLOD	0.000673042	0.0362932	2.24197	0.232377	0.0640422	BelowLOD	0.0210911	inf	BelowLOD	0.0525622	0.517615	BelowLOD	0.206284	0.660752	0.176834	0.082431	0.0740532	1.93192	0.444906	0.358889	9.01169	0.797747	0.202954	22.2519	1.11175	0.0838473	58.8279	1.84632	0.250633	12.1679	0.547967	0.0406778	5080.78	35.8838	0.112899	BelowLOD	19.6271	45.0078
C915 - 14.d	30	BelowLOD	461.592	814.625	5.70128	2.03461	2.71147	463503	12813.2	0.539126	BelowLOD	0.00426729	0.055511	2.52085	0.312832	0.0526613	BelowLOD	0.060816	inf	BelowLOD	0.163738	0.575979	BelowLOD	0.262377	0.764071	0.237841	0.124237	0.132569	1.37803	0.543561	0.208933	11.956	1.15499	0.0371982	24.6299	1.35489	0.208947	64.9527	2.62577	0.251802	12.4792	0.540636	0.0708793	5038.05	50.7048	0.212734	175.634	56.7591	72.0172
C915 - 15.d	30	BelowLOD	264.35	775.054	3.11717	1.33852	2.07024	473900	9776.31	0.435677	BelowLOD	0.000418318	0.0385896	1.92173	0.195519	0.0248404	BelowLOD	0.0312588	inf	BelowLOD	0.194577	0.390615	0.424589	0.370172	0.248076	0.210771	0.0869973	0.0706669	3.34786	0.642435	0.379653	14.4822	0.986323	0.167902	29.1764	1.02852	0.0943285	77.7609	2.03716	0.29111	15.2207	0.495778	0.0463612	5174.52	46.5466	0.105939	BelowLOD	18.9786	44.5716
C915 - 16.d	30	BelowLOD	333.533	597.49	4.13021	1.38589	2.38542	466514	9976.53	0.597124	BelowLOD	0.0147563	0.041356	2.30267	0.223095	0.0593761	BelowLOD	0.0878373	inf	BelowLOD	0.117621	0.405751	BelowLOD	0.155386	0.521978	0.238942	0.104199	0.075985	2.05619	0.512915	0.325806	8.12385	0.665812	0.131069	21.5287	0.710914	0.0954745	56.1095	2.05621	0.0917495	11.7403	0.561713	0.0430033	5114.66	41.0382	0.0925243	BelowLOD	22.7305	46.7725
C915 - 17.d	30	BelowLOD	259.366	904.424	3.44139	1.56062	2.26297	473055	10389.1	0.798972	BelowLOD	0.00705803	0.0593587	1.8737	0.204303	0.037302	BelowLOD	0.0331942	inf	BelowLOD	0.110068	0.373042	BelowLOD	0.216732	0.400189	0.344396	0.115561	0.0846605	1.70862	0.481787	0.353965	10.8143	0.964675	0.256547	22.0392	1.1295	0.122579	63.3315	2.62239	0.14039	12.4457	0.476768	0.0325648	5125.92	39.3071	0.110964	BelowLOD	24.6252	43.8296
C915 - 18.d	30	BelowLOD	285.653	757.999	4.96204	1.32114	2.11253	474305	8663.02	0.630726	BelowLOD	0.000573433	0.027937	2.51325	0.214774	0.0575277	BelowLOD	0.00313683	inf	0.41093	0.257967	0.217536	0.724459	0.350242	0.472037	0.270936	0.110492	0.129273	1.62846	0.501742	0.332956	10.0572	0.826301	0.25201	22.7036	0.957916	0.117621	59.501	2.38982	0.260966	12.1459	0.367183	0.0990466	5243.77	46.0982	0.106549	BelowLOD	16.4546	50.6984
C915 - 19.d	30	BelowLOD	214.967	737.922	5.42099	1.51466	2.67873	465616	8854.76	0.473247	BelowLOD	0.0139378	0.0709874	2.15345	0.245071	0.0467426	BelowLOD	0.033933	inf	BelowLOD	0.154412	0.129153	BelowLOD	0.229031	0.30227	0.0948838	0.0698055	0.0919765	1.53005	0.388592	0.453916	9.4784	0.756299	0.204702	20.9104	0.805832	0.100877	57.7832	2.18329	0.171243	11.435	0.453294	0.0412931	5092.37	38.7997	0.121597	BelowLOD	23.6533	36.0352
C915 - 20.d	30	BelowLOD	285.59	796.345	3.59364	1.58984	2.94982	470804	8905.92	0.587174	BelowLOD	0.00304254	0.0714157	2.48346	0.237931	0.0469451	BelowLOD	0.0325963	inf	BelowLOD	0.174257	0.408808	BelowLOD	0.200804	0.385579	0.113765	0.0724503	0.102184	1.82808	0.523746	0.27855	10.4099	1.08813	0.165967	23.6678	1.05492	0.131208	70.5363	2.75277	0.328843	13.5204	0.558211	0.0416292	5088.68	39.0779	0.189497	BelowLOD	27.0994	47.7232
C915 - 21.d	30	BelowLOD	373.661	808.115	4.42079	1.82725	3.0796	467964	10984.9	1.00052	BelowLOD	0.00325956	0.0580703	2.01548	0.197306	0.0598598	BelowLOD	0.0550895	inf	BelowLOD	0.0581134	0.490193	BelowLOD	0.184344	0.139607	0.136286	0.085866	0.119845	1.55062	0.509691	0.200551	8.08955	0.838714	0.1367	18.8512	1.11789	0.182139	51.3824	1.81943	0.245795	10.7664	0.450813	0.0412208	5016.78	45.5695	0.146211	BelowLOD	28.8026	45.7412
C915 - 22.d	30	BelowLOD	283.788	764.965	5.47033	1.90486	3.46571	472950	8020.82	0.585944	BelowLOD	0.00779388	0.0578797	2.40187	0.250205	0.0355054	BelowLOD	0.00971202	inf	BelowLOD	0.210499	0.570345	BelowLOD	0.15021	0.206574	0.128211	0.0792556	0.0711369	1.8056	0.472156	0.333486	9.85089	0.894072	0.154162	20.7363	0.949312	0.0862417	59.8916	1.97463	0.208106	11.6174	0.390033	0.0285454	5013.46	30.348	0.104173	BelowLOD	19.1812	51.341
C915 - 23.d	30	BelowLOD	284.913	903.666	3.39132	1.74617	3.09532	470523	7780.33	0.560304	BelowLOD	0.000578954	0.107698	2.37032	0.20233	0.0596725	BelowLOD	0.00279509	inf	BelowLOD	0.14726	0.639649	BelowLOD	0.267514	0.443481	0.124216	0.0640034	0.0502288	2.02167	0.430206	0.26794	9.82963	0.743003	0.174082	20.4111	0.783194	0.0870721	56.1369	2.07149	0.222025	12.2652	0.379499	0.0517647	5219.19	40.9914	0.0611649	BelowLOD	24.9428	45.9154
C915 - 24.d	30	BelowLOD	641.826	1028.41	BelowLOD	3.83257	5.20786	464632	15634.7	1.0318	BelowLOD	0.0247954	0.0636205	2.42002	0.37417	0.0533648	BelowLOD	0.0862999	inf	BelowLOD	0.431836	0.698965	BelowLOD	0.311704	0.581414	BelowLOD	0.0963724	0.127772	1.6609	0.679795	0.508512	10.0809	1.11803	0.20726	21.3883	1.50395	0.273726	60.9024	2.71996	0.241866	11.9409	0.443093	0.0541322	4940.67	51.4783	0.256333	95.5504	56.9733	66.3448
C915 - 25.d	30	BelowLOD	932.826	996.282	BelowLOD	7.09925	5.03897	456404	15218	0.78893	BelowLOD	0.0352349	0.0601162	1.5275	0.307144	0.046734	BelowLOD	0.209051	inf	BelowLOD	0.462715	0.719398	BelowLOD	0.494191	0.413559	0.214418	0.289177	0.150091	1.72077	0.791175	0.498033	9.22034	1.53119	0.264843	21.5405	1.62892	0.132111	60.3568	4.73701	0.319236	12.1041	0.695501	0.0660703	5008.86	75.1608	0.147218	134.351	123.528	65.3314
C915 - 26.d	30	BelowLOD	297.036	817.901	6.20598	2.78604	2.90301	468464	7849.62	0.549802	BelowLOD	0.000608939	0.0173828	2.24517	0.234958	0.057373	BelowLOD	0.135558	inf	BelowLOD	0.147778	0.615686	0.551246	0.323745	0.404654	0.204278	0.0987905	0.108353	1.80269	0.435232	0.194306	8.2803	0.806965	0.163278	21.2043	1.18289	0.123732	59.3925	2.05374	0.261377	11.6094	0.378471	0.0493996	5198.01	42.9403	0.261817	BelowLOD	22.4669	46.8101
C915 - 27.d	30	BelowLOD	382.932	817.638	5.11209	2.32829	3.80853	468481	8775.82	0.478201	BelowLOD	0.00979137	0.045993	2.24325	0.262008	0.0880943	BelowLOD	0.157993	inf	BelowLOD	0.145654	0.594164	BelowLOD	0.177056	0.51673	0.163714	0.0967663	0.123859	2.05764	0.601356	0.401645	8.30397	0.868721	0.0891032	19.7028	0.983613	0.0589431	55.1638	2.63012	0.277675	11.7796	0.475389	0.0493475	5085.49	51.4383	0.202533	BelowLOD	33.9539	64.0496
C915 - 28.d	14.747	BelowLOD	454.29	804.422	4.48779	3.68355	3.40409	485083	9801.12	0.648476	BelowLOD	0.00154782	0.0913173	1.90315	0.356175	0.0305101	BelowLOD	0.178138	inf	BelowLOD	0.0294234	0.394072	BelowLOD	0.121061	0.566318	BelowLOD	0.0911836	0.0997679	1.61413	0.643163	0.215867	6.88392	0.920292	0.256243	14.2118	1.30847	0.110645	39.6733	1.73013	0.171826	8.68628	0.538865	0.0406111	5205.48	48.4279	0.18247	53.7826	33.345	45.4986
C915 - 29.d	6.60534	BelowLOD	789.033	1538.92	9.99533	6.24398	6.67698	509687	11910	0.591967	BelowLOD	0.00599052	0.110322	2.24908	0.85513	0.0542487	BelowLOD	0.0581497	inf	BelowLOD	0.464261	0.379714	BelowLOD	0.0488198	0.796367	BelowLOD	0.223974	0.231298	1.24121	0.914077	0.267799	10.4116	1.69882	0.649114	23.4736	2.8716	0.358299	57.0929	5.59063	0.501822	11.9251	0.586206	0.0824737	5028.57	74.2973	0.204565	141.772	88.4072	104.72
C915 - 30.d	30	BelowLOD	323.356	580.828	5.36814	2.46843	3.65554	470043	7660.1	0.272813	BelowLOD	0.000522836	0.0482974	2.46499	0.278118	0.0757827	BelowLOD	0.0175811	inf	BelowLOD	0.136325	0.186675	BelowLOD	0.321022	0.500274	0.210055	0.0967739	0.117449	2.4653	0.533517	0.329098	11.1827	0.88832	0.136365	23.3536	1.12831	0.0522195	63.3916	2.40096	0.203208	13.716	0.438268	0.0641319	5126.39	40.4658	0.187258	BelowLOD	24.3455	43.8012
N915
N915 - 1.d	30	BelowLOD	329.926	762.058	3.7824	2.33778	3.50918	477142	9159.34	0.418755	BelowLOD	0.00118555	0.0725492	2.39843	0.232406	0.0291367	BelowLOD	0.0026898	inf	BelowLOD	0.0181702	0.436876	BelowLOD	0.268284	0.484647	0.122266	0.0765752	0.120314	1.5448	0.447114	0.284949	8.51071	0.950097	0.292278	19.1351	0.943409	0.139832	55.4816	2.00855	0.167553	11.0223	0.458916	0.0448306	5195.82	43.9767	0.163331	BelowLOD	22.6413	44.1977
N915 - 2.d	30	BelowLOD	310.31	831.108	6.43547	2.46182	3.02789	480875	9105.8	0.485539	BelowLOD	0.00119151	0.0483052	2.45562	0.224469	0.0407279	BelowLOD	0.0192148	inf	BelowLOD	0.100201	0.53874	BelowLOD	0.133322	0.407985	0.115963	0.0683597	0.0407941	1.81899	0.480546	0.131767	8.81907	0.604006	0.146546	19.5539	0.787114	0.160071	53.7093	2.33782	0.0633189	11.2504	0.414859	0.0198974	5270.37	39.7485	0.0654804	BelowLOD	20.0072	37.5241
N915 - 3.d	30	BelowLOD	288.445	823.523	6.45221	2.38104	3.13374	472916	7787.21	0.808375	BelowLOD	0.0102394	0.0664374	2.63849	0.244478	0.0916357	BelowLOD	0.0398892	inf	BelowLOD	0.0841537	0.194899	BelowLOD	0.124675	0.478066	BelowLOD	0.0658373	0.155427	1.69999	0.415156	0.206679	8.54957	0.867425	0.197844	19.3812	0.934978	0.113143	53.0213	2.29144	0.257613	11.1744	0.400218	0.0522649	5283.6	44.8345	0.126317	BelowLOD	19.0348	38.0711
N915 - 4.d	30	BelowLOD	326.347	796.081	3.10611	1.60086	3.01443	475967	7980.35	0.453284	BelowLOD	0.0120456	0.0680298	2.58384	0.308817	0.100281	BelowLOD	0.0027154	inf	BelowLOD	0.0669182	0.478166	BelowLOD	0.14415	0.374369	BelowLOD	0.0728016	0.0868312	1.31645	0.38408	0.0478209	7.85706	0.84313	0.233777	18.4924	0.91359	0.206841	52.158	1.84634	0.107512	10.4522	0.439491	0.027656	5375.33	41.7939	0.154347	BelowLOD	16.7686	43.5207
N915 - 5.d	30	BelowLOD	259.674	847.495	5.88915	2.3668	3.22472	474171	9466.13	0.447409	BelowLOD	0.000706893	0.0554706	2.89884	0.289245	0.0574934	BelowLOD	0.048636	inf	BelowLOD	0.078655	0.256737	BelowLOD	0.213459	0.305039	0.218835	0.0960627	0.103667	1.74996	0.451075	0.288319	10.8219	1.03323	0.249085	23.774	1.23413	0.0769994	66.0448	2.68438	0.215991	13.6072	0.551365	0.00725221	5035.36	44.1889	0.0787115	BelowLOD	19.5905	43.7692
N915 - 6.d	30	BelowLOD	281.538	690.435	BelowLOD	1.95558	3.28286	478887	9327.93	0.881985	BelowLOD	0.00762922	0.0968808	2.53517	0.296784	0.0669116	BelowLOD	0.00579682	inf	BelowLOD	0.262223	0.57813	BelowLOD	0.164855	0.19522	BelowLOD	0.0751145	0.115079	1.24484	0.467508	0.379571	8.83619	0.766483	0.185216	19.7378	1.3599	0.130609	55.1881	2.05517	0.264079	11.3174	0.421065	0.097572	5229.68	36.8589	0.139266	BelowLOD	26.4706	46.6816
N915 - 7.d	30	BelowLOD	245.93	721.544	BelowLOD	1.56456	2.63738	472664	10401	0.428752	BelowLOD	0.00727957	0.0583062	2.71907	0.257869	0.0651274	BelowLOD	0.0895856	inf	BelowLOD	0.147176	0.400491	BelowLOD	0.151816	0.471684	0.149012	0.0862948	0.139576	1.37937	0.397877	0.394922	8.66359	0.839885	0.165612	21.1973	1.17689	0.116476	56.7717	2.66312	0.191646	11.2017	0.503762	0.0338148	5331.63	43.7314	0.226174	BelowLOD	18.1545	40.2505
N915 - 8.d	30	BelowLOD	266.267	764.283	4.54177	1.77483	2.63608	474942	7942.02	0.637692	BelowLOD	0.00713425	0.0952077	2.9486	0.362051	0.0755331	BelowLOD	0.0941864	inf	BelowLOD	0.192208	0.3906	BelowLOD	0.10859	0.268562	0.0881213	0.0766788	0.0766996	1.96896	0.507293	0.324125	8.17844	0.780305	0.209665	18.7533	0.963397	0.0531724	53.5296	2.48572	0.242258	11.2927	0.496085	0.0364298	5298.54	40.2281	0.101253	BelowLOD	15.583	44.6459
N915 - 9.d	30	BelowLOD	330.098	842.282	6.55621	2.36393	3.41502	472591	8787.43	0.628137	BelowLOD	0.00569441	0.0857499	1.99499	0.302221	0.0729978	BelowLOD	0.152772	inf	BelowLOD	0.240522	0.434776	BelowLOD	0.170429	0.403348	BelowLOD	0.0318725	0.0964926	BelowLOD	0.221058	0.352972	2.80139	0.461981	0.201268	7.86077	0.72543	0.122435	21.501	1.28182	0.326456	5.12508	0.331019	0.0773075	5451.16	42.1886	0.101956	BelowLOD	22.116	42.3177
N915 - 10.d	30	BelowLOD	339.828	819.309	5.02966	1.75331	2.7922	481834	8560.43	0.763491	BelowLOD	0.0166979	0.0376304	2.84412	0.278749	0.0206286	BelowLOD	0.0299923	inf	BelowLOD	0.216637	0.514675	BelowLOD	0.266747	0.4388	0.118343	0.0744088	0.0927652	1.60596	0.497208	0.314017	9.78443	0.772655	0.167535	21.4447	0.857141	0.0379467	58.6758	2.19672	0.25397	12.8671	0.579142	0.0775795	5384.22	37.628	0.212244	BelowLOD	14.122	38.9361
N915 - 11.d	30	BelowLOD	265.075	890.832	3.34826	1.57426	2.53139	472082	7154.5	0.391928	BelowLOD	0.000384612	0.0882819	2.85124	0.258343	0.0503989	BelowLOD	0.728777	inf	BelowLOD	0.187268	0.259811	0.408211	0.321496	0.389944	BelowLOD	0.0521534	0.113424	1.51851	0.420625	0.310132	8.93117	0.882189	0.196858	21.2391	0.80581	0.0989568	58.6144	2.22766	0.140725	12.2681	0.445556	0.0862141	5384.74	40.1919	0.17064	BelowLOD	16.3229	49.0136
N915 - 12.d	30	BelowLOD	459.76	1069.48	4.81041	1.77927	3.10612	468675	8829.72	0.920546	0.050868	0.0753781	0.0420025	3.29044	0.462128	0.0797769	BelowLOD	29.3068	inf	0.324164	0.348918	0.144943	BelowLOD	0.37592	0.460738	BelowLOD	0.121561	0.150973	1.69931	0.601588	0.22425	9.51029	0.874652	0.0997493	22.0193	1.58773	0.214435	63.147	2.51951	0.224865	13.3932	0.696144	0.0567036	5152.45	52.2757	0.175154	BelowLOD	20.2731	49.3961
N915 - 13.d	30	BelowLOD	387.052	725.174	3.46942	1.95339	2.8857	480977	7669.14	0.755777	BelowLOD	0.000724199	0.0449017	4.4896	0.41429	0.0637125	BelowLOD	2.87715	inf	BelowLOD	0.267509	0.447795	1.011	0.55004	0.422643	0.350844	0.138138	0.117649	3.37045	0.70225	0.312393	14.6958	1.27175	0.175285	33.3293	1.31614	0.145713	86.7568	2.54016	0.235256	18.3199	0.642569	0.0616457	5554.45	50.7946	0.212255	BelowLOD	19.1467	41.3167
N915 - 14.d	30	BelowLOD	250.953	960.901	3.5945	1.39489	2.11194	470001	9636.7	0.18788	BelowLOD	0.0174093	0.0631517	1.89891	0.21531	0.0531856	BelowLOD	0.56305	inf	BelowLOD	0.126476	0.56332	BelowLOD	0.0956685	0.275489	BelowLOD	0.0480133	0.121218	0.919747	0.313134	0.294097	5.31605	0.560853	0.174854	10.8576	0.743056	0.0638387	32.4735	1.91092	0.262965	6.94892	0.38357	0.0557931	5346.89	45.076	0.138897	BelowLOD	20.4845	40.2522
N915 - 15.d	26.4765	BelowLOD	415.59	1039.35	3.5716	2.17552	3.09882	474760	12996.7	0.282406	BelowLOD	0.00893736	0.0858383	2.56914	0.388579	0.15973	BelowLOD	0.710963	inf	BelowLOD	0.143268	0.618897	0.601676	0.597868	0.178973	0.133376	0.141436	0.0442189	0.780204	0.479517	0.415922	10.5345	1.56319	0.447189	19.6414	1.39916	0.147918	56.6521	3.65033	0.264881	11.8112	0.744607	0.0623786	5307.52	61.1707	0.0648989	BelowLOD	38.1073	48.8908
N915 - 16.d	30	BelowLOD	343.319	955.707	4.04327	2.17038	3.71634	477937	10273.9	0.568512	BelowLOD	0.0275851	0.0655566	1.7929	0.276087	0.0557618	BelowLOD	0.213398	inf	BelowLOD	0.155569	0.602502	BelowLOD	0.310306	0.625532	BelowLOD	0.0356692	0.135597	0.75239	0.307583	0.544461	3.47498	0.572987	0.19388	8.7621	0.68122	0.15634	26.0877	1.64699	0.371295	5.36418	0.347986	0.0632911	5325.61	41.6077	0.186063	BelowLOD	23.3928	35.9002
N915 - 17.d	21.2787	BelowLOD	576.994	1215.23	BelowLOD	2.42021	3.1899	491451	15570.1	0.546219	BelowLOD	0.00939362	0.0829426	2.41373	0.457405	0.0493765	BelowLOD	0.385784	inf	BelowLOD	0.33174	0.66436	BelowLOD	0.21317	0.349894	BelowLOD	0.115498	0.144782	1.08504	0.57077	0.18112	9.18557	1.33045	0.310372	20.1644	1.35627	0.276103	49.744	2.84026	0.325481	10.2677	0.676492	0.106015	5186.32	57.0928	0.284543	BelowLOD	23.005	49.9627
N915 - 18.d	30	BelowLOD	278.076	742.472	3.94875	1.52734	2.61704	473325	8615.55	0.606931	BelowLOD	0.000676724	0.0577178	2.5929	0.210114	0.0104636	BelowLOD	0.246273	inf	BelowLOD	0.0125052	0.47059	BelowLOD	0.270747	0.433791	0.244607	0.102743	0.128303	1.98763	0.434676	0.202807	9.33833	0.592738	0.301721	20.3707	1.07442	0.160468	51.3461	2.1941	0.230035	11.3656	0.416903	0.0502945	5382.78	40.1427	0.156858	31.4327	17.5211	31.2007
N915 - 19.d	30	BelowLOD	287.545	624.338	BelowLOD	1.06474	2.80017	469094	8880.26	0.815992	BelowLOD	0.000688317	0.0560839	2.80281	0.286395	0.0488049	BelowLOD	0.257165	inf	BelowLOD	0.261418	0.296405	0.545282	0.353671	0.428367	0.133718	0.0778033	0.0615464	2.03087	0.572383	0.278208	9.48705	0.943269	0.236232	20.7156	1.10137	0.125201	54.5309	1.73478	0.188925	11.3581	0.446812	0.0696967	5116.6	32.362	0.154755	BelowLOD	17.6688	40.8614
N915 - 20.d	30	BelowLOD	301.027	611.479	BelowLOD	1.09985	1.98671	469550	7873.37	0.391757	BelowLOD	0.0129967	0.0382376	2.74257	0.275349	0.0984907	BelowLOD	0.522674	inf	BelowLOD	0.108726	0.480538	0.391579	0.330094	0.311473	0.250889	0.111949	0.115986	2.16565	0.460695	0.198058	9.60528	0.847771	0.219865	20.3545	0.91577	0.0877864	56.2796	2.28759	0.224562	11.6551	0.476908	0.0502054	5124.81	42.0273	0.176618	BelowLOD	13.8289	39.4672
N915 - 21.d	30	BelowLOD	246.685	844.726	2.65637	1.27512	2.12056	475934	8466.01	0.46715	BelowLOD	0.0181654	0.0977841	2.61057	0.243041	0.0291799	BelowLOD	0.274228	inf	BelowLOD	0.181175	0.236651	BelowLOD	0.086065	0.358272	0.20122	0.0851176	0.0978333	2.28688	0.541196	0.258305	9.70347	0.881122	0.211291	21.043	1.03081	0.0992219	55.7148	1.99866	0.254322	11.7779	0.412394	0.0417186	5339.8	50.9245	0.170295	37.0847	20.8355	34.2524
N915 - 22.d	30	BelowLOD	326.037	771.561	3.20395	1.31313	2.16798	471837	9998.17	0.192862	BelowLOD	0.022468	0.0608813	2.29966	0.263983	0.086099	BelowLOD	0.332314	inf	BelowLOD	0.0794985	0.33765	BelowLOD	0.198221	0.181254	BelowLOD	0.0591991	0.134001	1.55085	0.402587	0.230587	9.03971	0.820496	0.207491	18.8679	1.01222	0.114669	50.5249	2.02784	0.181381	10.8003	0.375232	0.0443228	5295.55	43.6678	0.146062	BelowLOD	20.6727	44.7155
N915 - 23.d	30	BelowLOD	321.983	703.208	3.25065	1.2488	1.90072	469799	7436.31	0.730505	BelowLOD	0.000793242	0.0639078	2.35366	0.270258	0.0574701	BelowLOD	0.205993	inf	BelowLOD	0.185047	0.35892	BelowLOD	0.286848	0.606437	0.183389	0.0867331	0.106765	1.35213	0.342367	0.263426	8.27842	0.619272	0.17119	19.0825	1.0359	0.0648843	52.2469	2.50259	0.311056	10.8197	0.378164	0.0360395	5396.42	43.377	0.140619	BelowLOD	15.5131	47.3664
N915 - 24.d	30	BelowLOD	294.086	868.346	BelowLOD	1.06107	1.9709	475143	8651.04	0.264459	BelowLOD	0.0150034	0.0509516	2.69215	0.206864	0.056952	BelowLOD	0.245722	inf	BelowLOD	0.245577	0.364614	BelowLOD	0.181588	0.444571	BelowLOD	0.048672	0.173996	1.63257	0.469406	0.363806	10.7805	0.843281	0.161828	22.3738	0.86848	0.147688	58.9546	1.78106	0.0633068	11.8262	0.480373	0.0486511	5061.84	35.6821	0.139976	BelowLOD	14.8538	37.2598
N915 - 25.d	30	BelowLOD	305.238	703.798	4.26287	1.30367	2.48822	476049	7766.18	0.479085	BelowLOD	0.0148601	0.0699097	2.95024	0.2996	0.0723285	BelowLOD	0.00901545	inf	BelowLOD	0.141541	0.598059	0.193358	0.235678	0.0639691	0.0271219	0.049808	0.0169046	2.02425	0.467587	0.376125	10.7353	0.875597	0.0970631	21.8717	1.35556	0.116989	60.8438	2.25545	0.161622	12.5828	0.462055	0.057503	5029.29	38.8947	0.182158	BelowLOD	18.2594	45.2738
N915 - 26.d	30	BelowLOD	331.952	596.729	2.53476	1.38359	1.94187	473511	8567.64	0.664259	BelowLOD	0.0012303	0.058231	1.72669	0.206907	0.0596365	BelowLOD	0.105689	inf	BelowLOD	0.152833	0.487595	0.371124	0.228825	0.127497	BelowLOD	0	0.0338375	0.464645	0.287613	0.302099	3.27066	0.511778	0.0811739	6.40173	0.540724	0.170261	19.3905	1.32365	0.229587	4.12074	0.227625	0.0397259	4943.72	37.3069	0.134494	BelowLOD	17.5033	46.6724
N915 - 27.d	30	BelowLOD	306.01	801.193	2.96503	1.30941	2.10818	484813	9234.96	0.458782	BelowLOD	0.000965027	0.00851006	1.73688	0.218021	0.0587074	BelowLOD	0.00573213	inf	BelowLOD	0.116758	0.703928	BelowLOD	0.14011	0.372208	BelowLOD	0.0405094	0.121472	0.846311	0.337108	0.29914	4.90567	0.604672	0.147804	13.2392	0.788769	0.0975554	36.5378	1.75755	0.259634	7.91538	0.291548	0.0542387	5243.84	42.5933	0.154336	BelowLOD	14.3637	41.3145
N915 - 28.d	30	BelowLOD	309.101	794.123	2.36335	1.26122	1.99081	473570	7459.03	0.416336	BelowLOD	0.0150885	0.049304	2.49309	0.232885	0.0341035	BelowLOD	0.133742	inf	BelowLOD	0.304542	0.628778	BelowLOD	0.24104	0.377635	BelowLOD	0.0483337	0.12373	1.1707	0.333923	0.265296	8.36069	0.966111	0.266686	18.5511	0.983905	0.134526	46.7628	2.09264	0.17858	10.207	0.421063	0.0498412	5297.9	36.7635	0.0233187	BelowLOD	18.9144	41.0364
N915 - 29.d	15.713	BelowLOD	293.027	920.023	BelowLOD	1.36335	2.31018	495633	12117.7	0.469978	BelowLOD	0.0150665	0.0508142	2.90693	0.450056	0.0215689	BelowLOD	0.103588	inf	BelowLOD	0.320324	0.607078	BelowLOD	0.244617	0.307046	0.177676	0.136957	0.137657	2.46949	0.565351	0.414199	9.97553	0.852391	0.161476	21.4448	1.28798	0.149502	61.5333	3.19479	0.177505	11.236	0.446604	0.0426266	5073.61	51.2624	0.163848	BelowLOD	24.4771	39.9903
N915 - 30.d	30	BelowLOD	262.639	778.872	BelowLOD	1.02943	1.93749	474673	8386.69	0.530206	BelowLOD	0.000727815	0.0512695	3.02777	0.286162	0.0101292	BelowLOD	0.00650714	inf	BelowLOD	0.0998129	0.124655	0.737204	0.420274	0.284836	0.185305	0.0918181	0.10198	2.38245	0.506697	0.13295	11.0808	0.93586	0.234885	25.7624	1.1531	0.114899	69.6388	2.35953	0.0893069	13.4931	0.496196	0.0466254	5284.84	43.9811	0.229846	BelowLOD	16.5594	45.4202
REFERENCE MATERIALS RUN 2
Z_91500
91500 - 1.d	30	BelowLOD	283.7	841.143	12.7075	4.92734	6.57101	474628	7720.35	0.502715	BelowLOD	0.00126181	0.0865246	2.4448	0.280994	0.0313163	BelowLOD	0.0119479	inf	BelowLOD	0.056867	0.303755	0.510755	0.383506	0.243253	0.178028	0.087898	0.0857238	2.14905	0.504759	0.152624	9.59461	0.831499	0.226661	21.04	1.0918	0.114646	48.742	1.7039	0.31103	10.5989	0.38101	0.033676	5527.57	39.8807	0.132943	BelowLOD	27.1192	64.4469
91500 - 2.d	30	BelowLOD	337.096	797.935	11.197	3.20748	4.34324	472313	7689.55	0.488613	BelowLOD	0.000825956	0.0471604	2.62808	0.226987	0.0615544	BelowLOD	0.0156877	inf	BelowLOD	0.136065	0.246515	BelowLOD	0.283134	0.297834	0.244426	0.0937349	0.0654847	2.17738	0.41485	0.155096	11.3	0.749896	0.0543111	22.4722	1.20893	0.0528441	59.1664	1.88138	0.179835	12.3941	0.576614	0.0799694	5381.82	29.5973	0.202467	BelowLOD	24.4582	40.6799
91500 - 3.d	30	BelowLOD	250.433	692.268	4.28923	1.56946	1.65001	471411	8690.94	0.794253	BelowLOD	0.014101	0.0474583	2.88197	0.321881	0.0866679	BelowLOD	0.589206	inf	BelowLOD	0.182733	0.278038	BelowLOD	0.326381	0.575645	0.180046	0.0913924	0.128233	2.16989	0.518512	0.180512	9.71654	0.908672	0.341211	23.2622	1.05214	0.0625183	61.9754	2.48384	0.203167	12.3692	0.470614	0.046351	5423.52	53.7364	0.18579	BelowLOD	16.2639	39.1682
91500 - 4.d	30	BelowLOD	262.476	652.846	3.90036	1.05114	2.28328	464675	7845.34	0.171268	BelowLOD	0.0121865	0.00772161	2.94735	0.186401	0.041783	BelowLOD	0.00120624	inf	BelowLOD	0.163393	0.315148	BelowLOD	0.284823	0.652625	BelowLOD	0.0723502	0.132932	1.93226	0.46492	0.331198	11.2992	0.956863	0.137741	23.1583	0.976492	0.0927519	62.8067	2.2897	0.166325	11.912	0.477237	0.032103	5345.19	36.9882	0.204268	BelowLOD	19.265	36.0261
91500 - 5.d	30	BelowLOD	310.63	606.434	8.4207	2.78641	5.30205	470969	6716.19	2.90221	BelowLOD	0.000392102	0.0435375	2.46212	0.230292	0.0621123	BelowLOD	0.0987497	inf	BelowLOD	0.14847	0.433031	BelowLOD	0.233364	0.520736	0.180263	0.0945478	0.0679666	2.10174	0.54694	0.321784	11.2674	0.992444	0.142908	20.8305	0.818204	0.123852	58.5091	2.59166	0.146252	12.4042	0.539998	0.0387322	5435.84	42.7924	0.167963	BelowLOD	23.174	51.1695
91500 - 6.d	30	BelowLOD	273.4	738.576	BelowLOD	4.20316	8.82679	474877	7811.76	0.431395	BelowLOD	0.0098084	0.0546256	3.17679	0.223044	0.0588424	BelowLOD	0.0505254	0.122612	BelowLOD	0.101857	0.483682	0.288702	0.260619	0.120541	BelowLOD	0.0572932	0.099432	2.82011	0.535594	0.178524	10.0811	0.812068	0.19211	21.6747	0.913471	0.0801987	56.9288	2.12393	0.223588	11.9735	0.456457	0.0265356	5464.59	43.2342	0.174575	BelowLOD	93.8668	127.912
91500 - 7.d	30	BelowLOD	250.779	733.201	BelowLOD	1.72259	3.64832	476965	8689.02	0.546814	BelowLOD	0.0123294	0.0563856	2.61264	0.276209	0.0427193	BelowLOD	0.0198195	2.15824	BelowLOD	0.231633	0.337879	BelowLOD	0.178706	0.2062	0.241627	0.104564	0.0834081	1.59895	0.393489	0.324772	9.18476	0.854852	0.186144	21.7251	0.890595	0.0953889	59.3464	2.60771	0.0854705	12.4759	0.404848	0.0455277	5502.02	48.7372	0.0957438	BelowLOD	356.8	331.7
91500 - 8.d	30	BelowLOD	269.822	588.977	5.02983	1.8294	2.58243	473597	7369.45	0.189727	BelowLOD	0.000533445	0.044318	2.54343	0.238693	0.0604015	BelowLOD	0.000949734	0.172785	BelowLOD	0.161437	0.511632	BelowLOD	0.203983	0.460204	0.238312	0.0920689	0.134625	2.11319	0.484641	0.125957	9.41002	0.798542	0.137584	20.028	0.968412	0.150468	55.4847	2.05504	0.0824843	11.7325	0.436868	0.0600772	5481.43	40.3224	0.0982664	1127.96	1054.61	749.173
91500 - 9.d	30	BelowLOD	254.309	780.309	4.39038	2.06452	2.63992	480822	8096.59	0.489471	BelowLOD	0.000226857	0.0241527	2.54438	0.305316	0.0744543	BelowLOD	0.00029626	0.0300747	BelowLOD	0.132833	0.484421	BelowLOD	0.119714	0.447779	0.126049	0.0727247	0.080403	2.00502	0.513901	0.244104	9.91258	0.808127	0.253976	22.0834	1.03888	0.126482	53.9077	2.10302	0.135584	12.0219	0.456018	0.0192187	5421.43	39.8179	0.159243	BelowLOD	79.4434	197.785
91500 - 10.d	30	BelowLOD	314.052	712.91	13.0548	5.49171	8.1344	481419	7845.18	0.571279	BelowLOD	0.000114665	0.0345681	3.11407	0.250401	0.0509126	BelowLOD	0.158894	0.455344	BelowLOD	0.337627	0.396065	0.330338	0.309541	0.316779	BelowLOD	0.0750912	0.146932	1.79614	0.429534	0.280732	9.25919	0.907857	0.240235	17.7143	0.678735	0.161189	52.6665	2.15381	0.192724	10.9023	0.468221	0.0503428	5479.55	47.2572	0.159466	BelowLOD	57.0886	207.142
91500 - 11.d	30	BelowLOD	349.805	615.299	3.28544	1.61436	2.4059	483476	9868.62	0.594766	BelowLOD	0.01848	0.068309	2.6232	0.216271	0.0587552	BelowLOD	0.00109869	inf	BelowLOD	0.129505	0.480543	0.675945	0.3916	0.204084	0.167188	0.103786	0.100458	1.86689	0.464967	0.321888	8.67097	0.715074	0.148918	19.8911	0.954321	0.0866759	52.876	1.71279	0.254745	10.5082	0.397681	0.0317913	5417.4	44.1479	0.161559	BelowLOD	13.8285	34.4787
91500 - 12.d	30	BelowLOD	309.637	712.193	4.66908	1.55213	2.53415	476990	6966.28	0.433185	BelowLOD	0.000633285	0.04331	2.78157	0.246791	0.0774599	BelowLOD	0.0328127	0.101464	BelowLOD	0.164852	0.63735	0.865447	0.403099	0.208378	0.129812	0.0797732	0.113083	2.05625	0.497982	0.328708	9.19941	0.731397	0.192693	21.8264	0.894901	0.0757925	58.3457	2.28721	0.157374	12.3365	0.423462	0.0374273	5464.86	44.1584	0.101603	BelowLOD	18.7138	44.2608
91500 - 13.d	30	BelowLOD	247.211	596.758	3.2884	1.44858	2.29687	473575	8915.31	0.676904	BelowLOD	0.000663382	0.0635342	2.69157	0.260268	0.0913714	BelowLOD	0.0144208	inf	BelowLOD	0.188145	0.611945	BelowLOD	0.169966	0.293174	0.225244	0.0854648	0.112409	2.23905	0.522568	0.488388	9.90652	0.873919	0.148985	22.4757	1.21622	0.118563	61.9324	2.17608	0.223323	12.9112	0.477429	0.0339534	5340.17	41.5393	0.117517	BelowLOD	14.5062	34.5163
91500 - 14.d	30	BelowLOD	245.021	724.619	BelowLOD	1.4741	2.31775	474694	7651.93	0.65388	BelowLOD	0.000376726	0.0516656	2.53924	0.227957	0.0786964	BelowLOD	0.00130319	inf	BelowLOD	0.319465	0.467034	0.62462	0.366105	0.41616	0.221444	0.0939968	0.0396665	2.10178	0.482996	0.201722	9.53187	0.912434	0.204897	21.019	0.790463	0.147126	56.2186	2.29081	0.169003	12.0243	0.411401	0.0556039	5414.3	41.0862	0.152218	BelowLOD	12.1086	22.4221
91500 - 15.d	30	BelowLOD	254.54	723.184	5.79183	2.04058	3.63949	469453	8047.64	0.797939	BelowLOD	0.000643412	0.0478434	2.71314	0.233866	0.0726067	BelowLOD	0.00350046	0.0489724	BelowLOD	0.178304	0.414441	BelowLOD	0.194133	0.365822	0.202694	0.0914322	0.0717562	1.52319	0.449468	0.237512	9.90527	0.860992	0.0746536	19.1116	0.915433	0.131432	56.982	1.92437	0.179724	11.4001	0.354536	0.0534218	5356.45	38.3108	0.0924601	BelowLOD	21.8558	50.165
91500 - 16.d	30	BelowLOD	266.773	896.879	6.21131	2.68582	4.09415	465861	8265.1	0.622129	BelowLOD	0.000175555	0.0371355	2.77134	0.205409	0.0721037	BelowLOD	0.0133983	0.0582981	BelowLOD	0.0950294	0.520305	BelowLOD	0.147815	0.367416	0.138596	0.0682565	0.0832312	1.91055	0.412592	0.534323	10.0277	0.750574	0.251527	20.9334	1.06024	0.12748	55.4313	1.64243	0.128404	11.4972	0.417067	0.0376066	5491.95	38.8736	0.0900665	BelowLOD	33.6783	inf
91500 - 17.d	30	BelowLOD	344.285	764.346	6.70409	3.51065	5.27748	477978	7688.41	0.342767	BelowLOD	0.014548	0.0510997	2.65666	0.247436	0.0462585	BelowLOD	0.0468275	0.0351671	BelowLOD	0.0879502	0.370288	0.599033	0.34661	0.209128	0.238622	0.100646	0.0786285	1.42454	0.439221	0.182738	9.9516	0.577161	0.242626	18.1571	0.843631	0.0995208	51.8599	1.75758	0.19662	11.0715	0.377958	0.0316426	5539.44	46.1118	0.103514	BelowLOD	28.5423	59.3723
91500 - 18.d	30	BelowLOD	249.84	591.21	7.93641	2.85177	4.63717	476323	8844.6	0.186089	BelowLOD	0.0104391	0.0385036	2.65981	0.259142	0.0920309	BelowLOD	0.0266076	0.0192607	BelowLOD	0.0853671	0.248268	BelowLOD	0.219435	0.428652	0.270444	0.0934583	0.0545566	2.08663	0.406605	0.190461	10.0022	0.878246	0.159923	21.7238	1.06677	0.160045	58.1745	1.90491	0.254536	11.4235	0.418656	0.0300969	5508.97	36.1024	0.0879954	BelowLOD	18.5761	33.2826
Z_FC1
FC1 - 1.d	30	BelowLOD	365.043	847.128	137.344	16.3193	7.98045	471789	8406.19	0.194084	BelowLOD	0.0248503	0.0726604	5.66577	0.371128	0.0521612	BelowLOD	0.0405509	inf	3.84342	0.740693	0.251068	7.88993	1.33448	0.236485	0.345522	0.111933	0.0648835	29.7865	2.7415	0.250654	106.276	7.86729	0.141041	152.742	8.1582	0.141535	243.175	11.6521	0.15789	49.2531	2.257	0.0396177	8541.22	118.341	0.19325	BelowLOD	30.1294	69.6203
FC1 - 2.d	30	BelowLOD	254.131	647.19	15.2278	2.24047	1.83966	466316	8433.31	0.494181	BelowLOD	0.0162772	0.0206835	7.06804	0.456596	0.0246331	BelowLOD	0.135764	inf	1.93031	0.554844	0.160936	3.78188	0.782579	0.361023	0.192	0.0871607	0.0942757	16.3678	1.57991	0.266989	77.7832	3.01705	0.237207	122.811	2.38169	0.048891	243.644	6.59911	0.0982897	45.3187	1.09115	0.0272818	8864.12	103.993	0.195181	BelowLOD	19.7129	37.0631
FC1 - 3.d	30	BelowLOD	224.939	611.18	33.7811	5.69005	5.80254	459410	10388.1	7.53798	BelowLOD	0.0188794	0.0454158	13.7075	0.438755	0.0715402	BelowLOD	6.27523	0.399424	9.10377	1.08034	0.546999	14.8059	1.43615	0.436385	0.254031	0.101771	0.0664301	63.0986	2.96825	0.238142	203.972	3.92432	0.0749073	273.12	4.1579	0.115648	452.009	6.715	0.140367	87.9856	1.55899	0.0515044	10516.4	158.824	0.149123	85.3605	42.5532	64.6209
FC1 - 4.d	30	BelowLOD	275.052	687.082	16.5407	2.75405	3.77645	463085	10201.9	0.177377	BelowLOD	0.0077381	0.0579426	13.9548	0.606789	0.0455255	BelowLOD	0.197706	inf	9.05917	0.973563	0.311719	14.9403	1.31003	0.384344	0.396655	0.117581	0.177354	60.0533	2.14132	0.124463	201.383	3.78919	0.228189	283.819	4.51901	0.119928	473.082	6.25493	0.184172	88.5026	1.36312	0.0502678	10096.2	104.307	0.140935	1915.33	1218.86	524.133
FC1 - 5.d	30	BelowLOD	239.259	626.574	21.4162	4.31683	3.38293	464915	9426	0.268991	3.40264	0.38549	0.0588215	20.3612	0.930051	0.0432103	0.655506	0.0949766	0.026783	15.0356	1.69549	0.467692	13.6148	1.55868	0.506373	0.84192	0.171875	0.110061	49.3793	2.00138	0.219206	179.601	4.75728	0.122811	282.389	5.04701	0.154056	451.676	8.44149	0.141986	87.5309	1.42417	0.0408715	9545.33	126.721	0.0995213	BelowLOD	87.5289	174.174
FC1 - 6.d	30	BelowLOD	321.575	733.058	18.2451	3.18916	3.15738	468889	9187.58	0.41803	0.613685	0.266106	0.0311513	13.5435	1.12057	0.0470223	BelowLOD	0.0921211	inf	11.3831	1.82505	0.531553	11.5159	1.73299	0.0585043	0.404223	0.110624	0.0816598	53.9639	3.94307	0.289294	177.84	11.1438	0.119717	275.751	16.0967	0.0481417	481.238	27.8902	0.143457	88.8827	5.69733	0.0582512	9691.72	92.9975	0.169694	BelowLOD	15.4059	28.6326
FC1 - 8.d	30	685.327	351.002	620.395	16.5388	2.52622	2.51179	459121	7212.71	0.520595	47.7778	5.04399	0.051803	85.6813	7.65421	0.0818291	BelowLOD	21.6509	inf	64.2132	6.74897	0.50953	13.5155	1.54883	0.489436	0.828106	0.17151	0.0841415	32.3539	2.19117	0.125521	110.154	4.74532	0.182259	172.244	5.89241	0.0722731	305.25	9.38784	0.14896	58.5258	1.35056	0.0289973	9769.29	100.284	0.186254	37.0935	17.3145	23.0053
FC1 - 9.d	30	BelowLOD	274.197	768.662	31.9255	4.33568	4.51186	464771	8368.31	0.193335	BelowLOD	0.000522012	0.0643771	7.12732	0.406746	0.0569871	BelowLOD	0.0188988	0.107194	0.67088	0.332557	0.461466	2.13277	0.535693	0.448658	BelowLOD	0.0293548	0.0543067	13.2229	1.24451	0.175419	60.1143	2.57464	0.0734277	99.5359	3.63971	0.0357278	193.076	4.75923	0.138278	39.7087	1.11374	0.028037	10278.8	112.089	0.247354	BelowLOD	82.1879	inf
FC1 - 10.d	30	BelowLOD	237.146	595.031	15.9874	3.8721	4.2132	466063	8401.92	0.316005	BelowLOD	0.0126594	0.0470807	16.0761	0.690795	0.0729005	0.454921	0.151909	0.054825	3.76441	0.562291	0.428913	10.379	1.20819	0.356542	BelowLOD	0.0726952	0.0970271	49.7746	2.14715	0.340864	205.333	4.21506	0.251899	346.937	5.18719	0.0767118	610.866	8.8204	0.057034	101.672	1.52144	0.00648794	11945.4	118.155	0.249872	BelowLOD	10.9398	26.8898
Z_GJ1
gj - 1.d	30	BelowLOD	334.774	777.226	BelowLOD	3.11472	5.63031	466379	8072.72	0.657102	BelowLOD	0.00108771	0.0674187	16.1373	0.606048	0.052542	BelowLOD	0.00828366	inf	0.567492	0.270977	0.416619	1.33165	0.425566	0.455569	1.21444	0.201683	0.135178	6.94569	0.75482	0.234316	20.264	1.25192	0.164911	29.4585	1.40537	0.0638306	62.3327	2.24023	0.267593	13.1986	0.438416	0.0425018	6570.16	63.9789	0.1363	BelowLOD	22.8762	58.38
gj - 2.d	30	BelowLOD	277.808	605.428	6.16173	2.94114	4.94379	463546	7984.46	0.650037	BelowLOD	0.000701172	0.0535394	15.8147	0.670665	0.0191621	BelowLOD	0.0248228	inf	0.893966	0.406025	0.398562	1.15454	0.452529	0.271839	0.913157	0.183971	0.102914	6.71954	0.866124	0.279029	19.7194	0.878041	0.119859	29.2005	1.02528	0.202268	61.6964	2.02829	0.121147	13.0193	0.379283	0.0556003	6542.81	51.3275	0.0632778	BelowLOD	24.3698	55.1696
gj - 3.d	30	BelowLOD	360.552	719.519	3.41684	1.0918	1.95409	465290	7125.49	0.431663	BelowLOD	0.0070391	0.0437271	16.0266	0.601163	0.0720833	BelowLOD	3.32119	inf	0.430223	0.298342	0.415597	1.71517	0.669123	0.426365	0.979103	0.201724	0.0916288	6.96212	0.895083	0.276926	19.875	1.12408	0.25599	29.3265	1.03055	0.100027	62.0855	2.34442	0.174873	13.1139	0.384341	0.0327012	6556.31	58.6112	0.125617	BelowLOD	17.5699	38.3242
gj - 4.d	30	BelowLOD	252.186	669.71	3.91002	1.24067	2.42496	458962	7889.09	0.60052	BelowLOD	0.00954435	0.054532	15.996	0.595829	0.090222	BelowLOD	0.0400764	inf	0.528627	0.350965	0.281774	1.74141	0.606521	0.289414	0.856502	0.219068	0.130775	7.11177	0.811913	0.197112	19.936	1.20368	0.162553	29.2825	1.19135	0.143939	61.9674	2.75165	0.180771	13.1016	0.421249	0.0317296	6551.82	69.0041	0.116152	BelowLOD	18.2599	39.6485
gj - 5.d	30	BelowLOD	334.761	589.468	BelowLOD	2.46356	4.56739	467100	8802.15	0.764448	BelowLOD	0.000508183	0.0603433	16.0032	0.75551	0.0556826	BelowLOD	0.282493	inf	0.730671	0.381537	0.542562	1.35302	0.467132	0.174407	1.14965	0.194966	0.0478501	7.21866	0.920629	0.258155	19.8962	1.09862	0.123685	29.3088	1.06729	0.124468	62.0106	2.58468	0.27755	13.0933	0.504017	0.0551205	6591.3	54.6273	0.176825	BelowLOD	20.4593	50.7807
gj - 6.d	30	BelowLOD	239.211	687.52	BelowLOD	3.83877	5.34378	470285	7468.66	0.19328	BelowLOD	0.0009591	0.0594227	15.9997	0.595433	0.0489961	BelowLOD	0.0716051	0.421145	0.452421	0.315857	0.266905	1.59491	0.508864	0.20362	1.14022	0.216044	0.10331	6.29511	0.678392	0.381063	19.8821	1.26592	0.160415	29.3024	1.03618	0.0867076	62.0063	2.11103	0.17705	13.1041	0.379906	0.0672104	6565.46	64.2007	0.156327	BelowLOD	106.155	152.453
gj - 7.d	30	BelowLOD	270.564	732.778	3.84306	1.6912	3.59206	471418	8480.11	0.185299	BelowLOD	0.000859589	0.0414008	15.9972	0.642529	0.0497888	BelowLOD	0.0388567	6.29742	0.867743	0.328875	0.394464	1.44964	0.425326	0.170545	0.787452	0.156886	0.13193	7.39675	0.925431	0.232704	19.9653	1.18264	0.163855	29.2916	1.0689	0.12603	61.9881	2.30815	0.131421	13.0956	0.468702	0.05221	6487.41	60.2628	0.200856	BelowLOD	370.629	334.421
gj - 8.d	30	BelowLOD	247.948	708.074	3.30638	1.70544	2.42148	463360	7916.87	0.521372	BelowLOD	0.000737711	0.0653045	16.0048	0.714194	0.0580644	BelowLOD	0.190965	0.100201	0.710515	0.389422	0.53707	1.29314	0.43641	0.0618164	1.05537	0.207284	0.066962	6.97347	0.883543	0.340537	19.7474	1.13557	0.157332	29.3108	1.12303	0.11898	62.0019	2.38864	0.188449	13.0996	0.403729	0.0342153	6606.24	52.0947	0.155294	BelowLOD	755.751	476.185
gj - 9.d	30	BelowLOD	269.623	626.225	4.16172	1.90674	2.94265	465591	7824.55	6.30039	BelowLOD	0.00742193	0.0612712	16.0002	0.72857	0.0327377	BelowLOD	0.0274257	0.0457493	BelowLOD	0.308011	0.482919	1.27875	0.522077	0.482631	0.97233	0.223999	0.146416	7.23709	0.966525	0.279449	20.2426	1.16403	0.169175	29.2946	1.15189	0.158775	62.009	1.86921	0.159971	13.1061	0.473102	0.0316984	6545.87	55.3419	0.0990252	BelowLOD	83.3105	278.624
gj - 10.d	30	BelowLOD	248.451	768.35	BelowLOD	4.19608	8.52437	473949	8302.36	0.722225	BelowLOD	0.0142427	0.0628152	15.9948	0.598157	0.060663	BelowLOD	0.865751	15.2366	0.669395	0.387569	0.609042	1.91624	0.479722	0.272118	0.945466	0.200291	0.12003	6.49873	1.05239	0.248466	19.3942	1.05899	0.296028	29.2932	1.17247	0.083748	61.9765	2.31306	0.276041	13.0878	0.510685	0.0421078	6558.99	61.6002	0.109442	BelowLOD	55.2221	166.375
gj - 11.d	30	BelowLOD	331.615	753.316	4.20569	1.66259	3.36338	473066	8162.14	0.428527	BelowLOD	0.0010088	0.0607009	16.0079	0.604981	0.0736174	BelowLOD	0.0113042	inf	0.685813	0.389331	0.432373	1.95463	0.563592	0.540197	1.09141	0.213375	0.0878652	7.42117	0.921096	0.36604	20.5907	1.01439	0.0945038	29.3136	1.01278	0.145285	62.0278	2.19518	0.205678	13.1073	0.345069	0.0355421	6544.16	55.3063	0.153578	32.2769	14.8768	28.4972
gj - 12.d	30	BelowLOD	258.68	582.271	3.25542	1.5945	2.50621	473151	8625.12	0.533887	BelowLOD	0.00651154	0.0604209	15.9981	0.590135	0.061651	BelowLOD	0.0607992	0.132679	BelowLOD	0.433222	0.546943	1.15675	0.394261	0.456327	0.999137	0.222869	0.129704	6.30022	0.899203	0.370295	19.5727	0.893239	0.168734	29.28	1.28966	0.112336	61.9844	2.18654	0.0858971	13.0961	0.397981	0.0298711	6550.5	61.6243	0.141685	BelowLOD	19.5537	24.9557
gj - 13.d	30	BelowLOD	318.141	583.306	3.50682	1.47532	2.34444	470587	7380.96	0.0965663	BelowLOD	0.00115374	0.0562672	15.9939	0.6364	0.0428238	BelowLOD	0.00650779	inf	0.642463	0.476319	0.500281	1.28263	0.442505	0.309009	1.02405	0.20073	0.130892	6.91685	0.859168	0.0888938	19.9516	1.05978	0.35353	29.3105	1.07759	0.0530403	61.9995	2.11391	0.191378	13.0977	0.395186	0.0194282	6548.27	51.2964	0.178162	BelowLOD	16.6868	36.2843
gj - 14.d	30	BelowLOD	279.985	853.766	3.66324	1.25616	2.30975	470127	9208.23	0.551377	BelowLOD	0.0165344	0.0501957	16.0069	0.604621	0.0636271	BelowLOD	0.0124203	inf	BelowLOD	0.410679	0.632508	1.48702	0.461205	0.353701	1.01078	0.223762	0.0853565	6.87433	0.946627	0.0890263	19.9248	1.01502	0.133242	29.2844	1.19633	0.15011	62.0016	2.16289	0.21295	13.1017	0.453754	0.0395298	6581.96	52.053	0.222782	27.3109	13.0453	22.099
gj - 15.d	30	BelowLOD	318.67	785.716	3.479	1.76327	2.88451	464382	8848.83	0.567253	BelowLOD	0.012589	0.037023	15.997	0.501105	0.0454507	BelowLOD	0.0337577	0.100402	0.612357	0.36625	0.46429	1.15659	0.558106	0.207844	1.02298	0.188292	0.0661055	7.47338	0.914988	0.218848	19.9581	1.15094	0.0736002	29.3287	1.12379	0.0358619	62.015	2.074	0.207427	13.1066	0.459033	0.0532548	6555.53	60.6442	0.14332	BelowLOD	24.29	47.6264
gj - 16.d	30	BelowLOD	233.85	565.721	BelowLOD	2.84979	4.70613	462773	8215.73	0.267258	BelowLOD	0.000360851	0.0609448	16.0061	0.612667	0.0856182	BelowLOD	0.0245437	0.0539302	BelowLOD	0.321699	0.590688	1.33647	0.39903	0.577137	0.985424	0.191334	0.0475063	6.36356	0.855489	0.203127	19.8236	0.835293	0.126421	29.2437	1.0868	0.136293	61.9404	2.06585	0.127172	13.0856	0.417582	0.0245155	6579.81	64.6076	0.20106	BelowLOD	28.6013	inf
gj - 17.d	30	BelowLOD	208.581	649.9	BelowLOD	2.38094	4.1104	467125	6971.2	0.474629	BelowLOD	0.0100728	0.0626705	15.9827	0.568298	0.0721765	BelowLOD	0.03232	0.0669352	0.568093	0.306959	0.306312	1.56279	0.490709	0.359632	1.05747	0.218134	0.13977	7.85448	0.781632	0.253541	20.4357	1.20225	0.195484	29.5935	1.26543	0.111353	62.2093	1.80316	0.357515	13.1642	0.454282	0.0483482	6536.8	35.6782	0.0235757	BelowLOD	26.6029	48.2118
gj - 18.d	30	BelowLOD	194.027	694.029	5.2429	2.4222	4.66351	474738	8876.81	0.678172	BelowLOD	0.0106044	0.0368232	16.0189	0.657033	0.0569572	BelowLOD	0.044947	0.0627649	0.758833	0.329113	0.552152	1.42589	0.441175	0.30294	0.960937	0.207195	0.0832767	5.88752	0.892365	0.289032	19.4679	1.1994	0.155895	29.0458	1.34806	0.164659	61.8446	1.74728	0.275763	13.0524	0.439545	0.0575406	6595.24	59.4084	0.161449	BelowLOD	18.3444	34.6699
Z_MudTank
mud - 1.d	30	BelowLOD	360.433	647.611	12.5432	3.83146	4.42854	465249	7437.38	0.888319	BelowLOD	0.00130365	0.0298391	0.637301	0.120691	0.00991731	BelowLOD	0.022261	inf	0.472939	0.359512	0.292776	0.719859	0.410426	0.253557	0.412356	0.150195	0.108821	3.01529	0.58798	0.387531	7.64561	0.801203	0.199862	7.58793	0.641587	0.183911	9.43918	0.930674	0.150262	1.53034	0.179959	0.0743446	9853.71	130.633	0.113031	BelowLOD	25.0165	52.2947
mud - 2.d	30	BelowLOD	377.153	817.221	12.3613	3.18188	2.90145	475402	8082.17	0.799137	BelowLOD	0.000717946	0.069737	0.76025	0.140025	0.0735891	BelowLOD	0.0298643	inf	BelowLOD	0.257667	0.565028	BelowLOD	0.205669	0.455883	0.309292	0.121581	0.0831995	3.49964	0.730619	0.29896	6.93268	0.718968	0.195883	7.03843	0.65822	0.11354	9.85573	0.838113	0.192693	1.56745	0.162282	0.0429563	10106.3	120.409	0.154261	BelowLOD	22.5273	48.5127
mud - 3.d	30	BelowLOD	271.586	800.005	4.17018	1.29032	2.33063	467039	8547.84	0.264497	BelowLOD	0.00757775	0.0424885	0.548786	0.120793	0.0105028	BelowLOD	11.0334	inf	0.295751	0.29037	0.119099	1.06117	0.453485	0.323733	0.475087	0.119552	0.148173	2.49951	0.614393	0.205866	7.19247	0.674885	0.177234	6.70832	0.624589	0.136461	8.53369	0.881413	0.208668	1.59842	0.18324	0.0411983	10215.6	81.9187	0.1234	BelowLOD	14.0099	45.8164
mud - 4.d	30	BelowLOD	255.215	643.052	6.25344	1.6449	2.5181	462409	7693.45	0.248666	BelowLOD	0.0010949	0.048434	0.500442	0.126071	0.0527977	BelowLOD	0.0564517	inf	0.435646	0.286961	0.374465	BelowLOD	0.304847	0.569115	0.255035	0.0902513	0.107801	2.4479	0.476027	0.274399	6.52623	0.716674	0.203492	6.82395	0.622329	0.0896294	8.19767	0.875587	0.243876	1.40907	0.155194	0.0413147	10327.3	118.953	0.160855	41.9407	19.7794	41.5741
mud - 5.d	30	BelowLOD	274.378	665.546	11.4225	3.46055	4.53364	467989	7798.58	0.618331	BelowLOD	0.000718447	0.0717266	0.531561	0.119849	0.0191463	BelowLOD	0.263193	9.47954	BelowLOD	0.150512	0.46678	BelowLOD	0.232201	0.403204	0.277476	0.113672	0.109692	2.6935	0.626684	0.289335	6.4294	0.717252	0.125136	6.26407	0.528414	0.103731	6.87252	0.746508	0.280607	1.3547	0.137765	0.0355315	10436.4	90.9626	0.0998946	BelowLOD	28.1869	53.4685
mud - 6.d	30	BelowLOD	309.352	690.562	21.904	5.13828	6.01042	463108	7476.21	0.276001	BelowLOD	0.000229196	0.0586115	0.543799	0.126056	0.0512763	BelowLOD	0.0454057	0.499858	BelowLOD	0.241013	0.310697	0.675762	0.411318	0.125385	0.370656	0.142948	0.0296219	2.49154	0.552334	0.157704	6.44469	0.639085	0.267684	6.05834	0.575243	0.15256	7.25927	0.684434	0.193814	1.268	0.133147	0.040651	10279.8	148.749	0.21083	BelowLOD	126.91	104.093
mud - 7.d	30	BelowLOD	274.874	662.226	6.48319	2.07744	3.60627	470415	8393.05	0.811594	BelowLOD	0.00991837	0.104672	0.578593	0.130064	0.0794215	BelowLOD	0.0244142	14.0562	0.425939	0.250817	0.204776	0.620576	0.345843	0.126244	0.269134	0.122305	0.0803204	2.3064	0.506888	0.337721	6.10484	0.71116	0.122174	6.21421	0.572616	0.0538889	7.49502	1.01571	0.210202	1.23423	0.147599	0.0498242	10571	124.499	0.142825	BelowLOD	345.622	345.48
mud - 8.d	30	BelowLOD	287.714	701.81	7.28613	2.30957	2.8492	469845	8826	0.43428	BelowLOD	0.0109454	0.0403054	0.481482	0.103439	0.075837	BelowLOD	0.0983362	0.0860356	BelowLOD	0.332162	0.446758	0.950962	0.331234	0.441264	0.462218	0.152211	0.0529053	2.25277	0.525164	0.327064	5.82623	0.587535	0.25793	5.9646	0.591638	0.0854478	7.42377	0.762474	0.103443	1.18543	0.109808	0.0639916	10262.9	118.688	0.137377	935.184	543.018	539.378
mud - 9.d	30	BelowLOD	255.947	722.148	9.47542	2.54898	3.94222	489728	8804.47	0.195875	BelowLOD	0.00848593	0.058323	0.602489	0.133369	0.0411247	BelowLOD	0.0162561	0.0219475	BelowLOD	0.335177	0.554241	BelowLOD	0.343493	0.33971	0.490566	0.143266	0.112744	3.02388	0.49317	0.27715	6.96073	0.702093	0.201919	6.54537	0.567224	0.183577	8.47724	0.748927	0.257593	1.28758	0.166011	0.0518368	10106.7	101.739	0.141885	BelowLOD	84.8894	218.003
mud - 10.d	30	BelowLOD	322.423	732.512	29.983	7.16478	7.17205	483184	8631.77	0.612807	BelowLOD	0.0116571	0.0390904	0.73386	0.135432	0.0480051	BelowLOD	0.157518	inf	BelowLOD	0.313286	0.217824	0.380684	0.260483	0.211185	0.490462	0.140112	0.0167206	2.8832	0.577481	0.258324	7.32325	0.662219	0.25412	7.13843	0.567061	0.158155	8.79086	0.935989	0.170618	1.47856	0.174541	0.0671067	9931.69	125.559	0.17068	BelowLOD	51.4048	165.662
mud - 11.d	30	BelowLOD	283.301	839.824	4.87953	1.8921	3.05864	473799	8283.8	0.551639	BelowLOD	0.007845	0.0517917	0.520039	0.111383	0.0505326	BelowLOD	0.0186475	inf	0.573002	0.360597	0.150795	0.4895	0.336404	0.291414	0.446669	0.120849	0.0919366	3.0834	0.661847	0.26449	5.47707	0.704683	0.0247709	5.96159	0.549145	0.130784	8.31018	0.78911	0.217185	1.094	0.123616	0.0532337	10430.5	93.2934	0.20236	BelowLOD	12.0576	29.5066
mud - 12.d	30	BelowLOD	278.717	604.152	5.88663	1.9218	2.8136	478785	7916.96	0.768608	BelowLOD	0.000695157	0.0401443	0.528481	0.128946	0.0613335	BelowLOD	0.0219283	0.0994295	0.475293	0.364723	0.361959	BelowLOD	0.151286	0.595335	0.506741	0.160463	0.0700214	1.88855	0.468225	0.201195	5.96478	0.675147	0.116252	5.97813	0.594853	0.0378694	7.03873	0.761028	0.236051	1.36682	0.154791	0.0735698	10265.7	124.965	0.19603	BelowLOD	20.809	55.71
mud - 13.d	30	BelowLOD	311.782	746.257	5.44322	1.74441	2.28085	472094	10464.2	0.865418	BelowLOD	0.0118872	0.0414743	0.534728	0.130854	0.0200824	BelowLOD	0.0242603	inf	BelowLOD	0.450307	0.535626	BelowLOD	0.22379	0.349514	0.435904	0.138074	0.0913739	2.98986	0.580017	0.205443	7.8416	0.663272	0.140556	6.99616	0.522421	0.107722	9.63292	0.916744	0.26595	1.76223	0.176354	0.0577787	9863.17	108.9	0.103696	BelowLOD	13.6594	34.066
mud - 14.d	30	BelowLOD	291.457	603.207	5.40545	1.22603	2.10154	470457	8729.75	0.481221	BelowLOD	0.000616466	0.0786572	0.611957	0.0999528	0.0430765	BelowLOD	0.0242459	inf	BelowLOD	0.376436	0.602901	0.84325	0.371897	0.439491	0.586424	0.140451	0.0851409	3.00416	0.521056	0.335679	7.8144	0.81936	0.119644	6.9802	0.565467	0.123745	9.32023	0.85651	0.158582	1.71381	0.178644	0.0430687	9893.45	143.599	0.169427	BelowLOD	11.3406	29.8745
mud - 15.d	30	BelowLOD	241.994	616.366	8.71844	1.87561	3.28422	471637	7226.53	0.798892	BelowLOD	0.00033669	0.0500424	0.694072	0.11837	0.0542934	BelowLOD	0.0359015	0.104315	0.601974	0.373731	0.461649	1.17422	0.410999	0.687972	0.493059	0.133066	0.0936089	2.98286	0.658237	0.299463	7.18907	0.724347	0.104943	6.33932	0.490213	0.143158	9.04225	0.744571	0.174094	1.47886	0.156943	0.04395	9834.96	127.509	0.185101	BelowLOD	26.5009	62.2592
mud - 16.d	30	BelowLOD	221.241	619.96	6.37328	2.76356	5.27779	470292	8665.87	0.579637	BelowLOD	0.0123502	0.037589	0.552215	0.117487	0.0873126	BelowLOD	0.0137471	0.0880211	0.376558	0.351002	0.179902	0.774091	0.448734	0.301783	0.386171	0.121235	0.0776217	1.90722	0.399486	0.206182	6.23445	0.78538	0.0745974	6.19122	0.427568	0.10772	7.77677	0.661026	0.179416	1.4595	0.174425	0.0403043	10322.8	107.548	0.0932978	BelowLOD	30.4496	inf
mud - 17.d	30	BelowLOD	234.014	698.214	15.0349	3.79283	5.05217	480419	8947.15	0.588327	BelowLOD	0.000920619	0.0760387	0.475906	0.0934225	0.0610265	BelowLOD	0.0323176	0.114811	BelowLOD	0.242648	0.485155	BelowLOD	0.278224	0.426866	0.356294	0.113724	0.0571279	2.02442	0.419167	0.278289	5.75109	0.598815	0.190085	5.59936	0.48557	0.0721428	7.88039	0.718972	0.160759	1.04226	0.148694	0.0336722	10159.1	137.113	0.171155	53.2063	23.5731	38.1551
mud - 18.d	30	BelowLOD	310.842	843.449	8.90657	3.18266	4.51637	481988	7525.5	0.781309	BelowLOD	0.000428939	0.0532421	0.559983	0.11813	0.0571958	BelowLOD	0.072781	0.0709542	0.270162	0.270932	0.16604	0.776381	0.36784	0.488795	0.437517	0.140279	0.0291576	2.75093	0.553564	0.281521	7.77132	0.666797	0.0944593	6.77841	0.559934	0.10008	10.2956	0.788834	0.3019	1.38839	0.153313	0.0482882	9953.91	127.788	0.144571	BelowLOD	19.1031	39.0012
Z_OG1
ogc - 1.d	30	BelowLOD	263.841	807.707	52.7681	14.1754	8.33204	453687	10640.7	0.456712	20.7432	2.74751	0.0413262	40.2587	4.28038	0.0539026	BelowLOD	0.347527	inf	20.1494	2.92153	0.444482	2.78132	0.655147	0.226082	0.774417	0.173667	0.0750587	5.19595	0.809383	0.324276	17.8721	1.26347	0.149627	45.2926	1.62359	0.0768037	130.369	3.07995	0.324878	36.133	0.85779	0.0556901	11647	177.183	0.15946	BelowLOD	31.5269	58.7775
ogc - 2.d	27.0745	BelowLOD	317.945	689.209	2.6893	1.20658	1.84799	467189	10454.6	0.179439	0.80324	0.222808	0.0924893	18.1037	1.54678	0.0671515	BelowLOD	0.769771	inf	10.5576	1.55499	0.486377	6.59051	1.33651	0.449875	1.42978	0.236037	0.246038	17.8102	1.63676	0.184279	58.3174	3.53557	0.143471	119.508	5.60811	0.158103	299.706	7.92824	0.197044	66.8799	1.57352	0.0280019	9534.07	142.912	0.141885	43.4822	17.6252	33.3918
ogc - 3.d	19.9908	BelowLOD	410.811	593.557	8.61335	5.50679	6.28698	470820	7482.79	0.400993	1.47904	0.971785	0.058634	19.6808	5.55206	0.00994628	BelowLOD	54.3308	0.775556	11.7536	6.76492	0.415826	5.21046	1.7128	0.580246	1.19479	0.390902	0.0803416	9.28892	1.75962	0.313285	29.8326	2.18355	0.22484	61.4795	3.79823	0.0516977	168.264	7.46659	0.159064	43.3899	1.66326	0.0559451	11555.3	466.266	0.0764266	BelowLOD	39.5931	73.0868
ogc - 4.d	23.1647	BelowLOD	297.387	569.237	3.66804	1.63788	2.69959	471672	10434.8	0.518377	0.461337	0.310193	0.0511243	15.0179	1.35511	0.00997516	BelowLOD	0.532811	inf	4.85745	1.64986	0.655524	5.221	1.32149	0.174193	1.3608	0.257348	0.108162	16.1056	2.19657	0.323309	48.9478	2.58453	0.119971	98.574	3.2781	0.103716	252.933	5.54696	0.210247	59.4454	1.42886	0.0496249	9891.28	259.824	0.0911969	BelowLOD	1403.9	529.232
ogc - 5.d	30	BelowLOD	184.639	589.165	16.0656	3.05166	3.17246	474802	8878.04	0.60924	9.96007	2.98771	0.0523111	122.251	33.3483	0.0757289	3.80052	1.1581	0.0111635	50.2357	13.4061	0.600546	13.6051	2.02219	0.362295	2.43231	0.272206	0.090315	32.5693	2.33523	0.305765	115.895	3.39851	0.127935	198.284	4.62612	0.137998	378.315	6.95694	0.233728	81.4534	1.74813	0.0282295	8020.84	110.203	0.166949	BelowLOD	65.5914	168.642
ogc - 6.d	30	BelowLOD	270.548	727.279	6.05085	2.38515	3.4697	464777	8652.12	0.468652	51.896	8.59784	0.00844253	219.603	42.1251	0.0430609	BelowLOD	3.87463	inf	169.226	31.8581	0.298165	26.6568	3.49985	0.231702	3.98533	0.538118	0.0487358	31.0718	2.09885	0.319694	50.48	1.67932	0.0817886	95.8879	2.24834	0.100065	246.871	4.8342	0.139307	56.175	0.993593	0.0335265	9033.09	100.11	0.130984	BelowLOD	16.2791	33.979
ogc - 7.d	30	BelowLOD	294.697	789.907	8.91396	2.0018	2.20156	464791	7216.73	0.703358	89.0665	4.27005	0.0853493	374.169	18.0733	0.0694094	BelowLOD	3.25802	inf	371.2	19.5658	0.609249	42.2029	3.52496	0.437511	7.86957	0.794442	0.0862265	51.0189	4.25265	0.301322	105.024	4.15196	0.337348	160.476	4.6191	0.191838	320.685	8.56326	0.170132	63.8685	1.73596	0.0479885	8272.57	152.448	0.15197	BelowLOD	16.8408	42.9767
ogc - 8.d	30	BelowLOD	316.344	644.309	20.8925	4.32657	3.21504	454292	7621.02	0.449943	279.435	55.6446	0.0391293	1075.11	209.765	0.0667867	BelowLOD	6093.11	1.26758	709.59	147.671	0.529977	100.322	21.4658	0.296285	14.8267	3.24057	0.0596445	74.3901	11.9526	0.235339	120.292	8.01169	0.334012	171.07	8.94839	0.14581	322.083	11.5646	0.173055	67.601	2.36197	0.0320009	8237.33	125.844	0.170172	46.9238	13.8657	33.483
ogc - 9.d	30	BelowLOD	255.732	546.171	21.0891	5.45757	4.06416	467246	9466.94	0.557552	0.552138	0.108369	0.0532541	17.5342	0.839745	0.0365532	1.17688	0.21711	0.0333726	11.5444	1.57827	0.409424	11.5783	1.39644	0.354036	2.4417	0.296193	0.0814338	31.0157	2.4324	0.214742	103.381	4.71008	0.159645	156.835	4.5054	0.0909442	311.531	6.09442	0.167105	67.8588	1.35673	0.0400122	8156.99	115.65	0.167102	BelowLOD	110.474	inf
ogc - 10.d	30	BelowLOD	260.64	610.835	20.8875	3.60122	4.13355	461024	7573.43	0.719927	1.60509	0.263717	0.0477366	29.6321	2.33548	0.0601999	9.81007	1.23854	0.0290755	24.6728	3.3088	0.352972	19.4728	2.2529	0.256485	3.70604	0.471593	0.100031	45.0924	2.44841	0.264382	133.475	4.4568	0.12827	233.488	6.8711	0.0176249	450.475	10.4518	0.147378	79.3396	1.95435	0.0409038	8178.9	116.539	0.175773	BelowLOD	12.8545	25.134
Z_Plesovice
ples - 1.d	30	BelowLOD	328.956	875.18	314.457	18.3407	6.5746	468746	9150.13	0.848477	BelowLOD	0.000599941	0.0745115	2.08493	0.201396	0.0642566	BelowLOD	0.0401737	inf	3.01894	0.712404	0.30193	4.72094	0.864917	0.415603	0.804424	0.187238	0.0538144	15.5063	1.35782	0.409183	55.456	2.03937	0.197587	53.6446	1.60462	0.0598084	60.4775	2.23264	0.165996	8.63722	0.309996	0.0523829	10980.5	84.4053	2.90228	BelowLOD	27.6901	49.1203
ples - 2.d	30	BelowLOD	253.904	670.502	61.058	4.31038	1.73933	461376	8952.48	6.62535	BelowLOD	0.0155669	0.0352176	2.04189	0.219816	0.0527768	BelowLOD	0.162036	inf	2.1808	0.601858	0.320898	4.43931	0.71445	0.489675	0.776229	0.16012	0.093747	13.2191	0.714218	0.425456	49.9936	1.83173	0.152155	48.967	1.68206	0.0345161	60.6117	2.09474	0.281514	8.42794	0.378554	0.0311158	11227.8	76.0719	0.106261	BelowLOD	19.8735	38.9423
ples - 3.d	30	BelowLOD	241.638	764.371	296.566	17.1149	7.19892	460523	7240.59	0.539509	BelowLOD	0.0193719	0.0576485	2.78057	0.222836	0.0614694	BelowLOD	10.5707	0.259541	3.86191	0.687491	0.434845	4.64633	0.713938	0.674036	1.46888	0.237209	0.0593802	18.345	1.50199	0.440441	66.7587	2.4923	0.195268	58.5238	1.59923	0.137262	73.0745	2.32664	0.173711	10.2892	0.4268	0.0388102	10731.1	124.335	0.209731	BelowLOD	43.5013	65.2055
ples - 4.d	30	BelowLOD	234.107	620.431	92.9044	6.10667	2.91076	469124	8324.85	0.907795	BelowLOD	0.0266106	0.0480109	2.07828	0.252848	0.0458573	BelowLOD	0.099398	inf	1.7075	0.491377	0.751315	3.43447	0.704912	0.624884	0.774966	0.174903	0.0473397	13.7884	1.02854	0.408272	51.6777	2.09674	0.195187	48.2843	1.42829	0.101026	63.204	2.20771	0.210924	8.57048	0.438942	0.0412407	11233.2	75.0266	0.130868	1751.09	3301.84	629.443
ples - 5.d	30	BelowLOD	237.796	654.751	130.452	8.82649	4.12912	477396	9493.48	0.643689	BelowLOD	0.00756047	0.0387182	1.94078	0.186331	0.0730785	0.0864045	0.0387888	0.0117687	2.22773	0.695529	0.513227	2.52578	0.586898	0.426212	0.632903	0.141723	0.107016	10.258	0.876836	0.299277	42.0299	1.7666	0.137775	42.2078	1.37617	0.138633	50.4895	2.30484	0.146596	7.36426	0.367121	0.00653081	11354	70.3247	0.266003	BelowLOD	82.0463	197.044
ples - 6.d	30	BelowLOD	341.409	687.756	103.374	5.93724	3.13013	476079	7682.62	0.387428	BelowLOD	0.01702	0.0829438	2.22719	0.306342	0.064343	BelowLOD	0.0390308	inf	3.21818	0.776494	0.511988	3.88865	0.832818	0.327457	0.877841	0.17909	0.144625	15.5738	1.45699	0.277919	51.7253	1.9217	0.208545	50.9603	1.61953	0.108706	66.5992	2.44138	0.238936	9.06148	0.36733	0.0514933	11237.6	90.777	0.0870508	BelowLOD	12.986	30.0947
ples - 7.d	30	BelowLOD	236.484	670.997	87.9408	5.68448	2.54161	466383	8070.02	0.265093	0.0446092	0.0370746	0.0328265	2.82275	0.24702	0.0580089	BelowLOD	0.0655253	inf	4.23007	0.860619	0.627566	5.72774	0.972333	0.375226	1.26639	0.298135	0.121953	18.8256	1.53233	0.471402	64.1325	1.88119	0.0906016	61.583	1.92836	0.139	82.2953	2.87003	0.0867624	11.9234	0.487481	0.0521497	10900.7	125.426	0.154792	BelowLOD	16.9085	44.3238
ples - 8.d	30	BelowLOD	303.434	742.65	83.3825	5.71789	2.87726	470520	8484.66	0.457975	BelowLOD	0.0277119	0.0612179	1.96362	0.178692	0.0525215	1.2201	0.593266	0.44744	2.67927	0.714236	0.469617	3.30598	0.652862	0.373134	0.726877	0.158266	0.0926942	11.6459	0.976531	0.364065	46.6844	1.7297	0.0520804	46.343	1.47277	0.14306	59.318	2.69028	0.191127	8.78629	0.463346	0.0568942	11276.7	88.0465	0.100292	BelowLOD	17.5068	33.8797
ples - 9.d	30	BelowLOD	277.942	712.301	248.721	13.6858	5.22418	466241	10157.4	0.548803	BelowLOD	0.0182447	0.0471658	2.68341	0.234791	0.0360661	BelowLOD	0.0744892	0.207635	2.62241	0.53355	0.545053	5.91043	1.0201	0.390999	1.01462	0.165908	0.0953962	16.6125	1.48772	0.174962	65.119	2.03437	0.15053	53.4761	1.36205	0.121596	65.1626	2.33958	0.257079	9.38772	0.36544	0.0246239	11144.3	77.4636	0.203783	BelowLOD	589.446	inf
ples - 10.d	30	BelowLOD	321.247	546.306	135.047	8.44383	3.27225	477702	8337.79	0.376531	BelowLOD	0.0148214	0.0497943	2.60484	0.218558	0.0436232	0.475307	0.213395	0.00899059	2.07805	0.486886	0.444356	3.76481	0.734288	0.33966	0.978108	0.200393	0.074627	13.3701	0.989264	0.393866	57.2783	1.89567	0.135806	67.4388	1.87684	0.177515	86.9426	2.61365	0.109415	9.64523	0.445007	0.0404152	11214.1	89.1745	0.0935214	16.9618	10.9364	16.9181
Z_R33
R33 - 1.d	30	BelowLOD	307.455	674.612	16.6872	3.77012	4.75049	470320	8645.7	0.49832	BelowLOD	0.0137553	0.0780564	4.3361	0.321242	0.0500133	BelowLOD	0.0202761	inf	0.940967	0.374852	0.491842	2.71899	0.670813	0.426377	0.376077	0.108748	0.0747508	12.8518	0.98809	0.0927463	65.6636	2.29485	0.121994	123.233	2.13974	0.122858	256.85	4.77815	0.255277	52.4102	1.08885	0.00696723	8815.09	118.277	0.235485	BelowLOD	27.7925	58.2782
R33 - 2.d	30	BelowLOD	261.218	764.097	12.6244	2.71914	4.92101	467069	8672.6	0.102962	BelowLOD	0.00091944	0.055303	5.47691	0.419093	0.0569389	BelowLOD	0.0681262	inf	2.13559	0.574669	0.507694	5.97196	0.921486	0.350981	0.924482	0.207548	0.101554	29.3921	1.97152	0.189894	121.515	3.15474	0.155695	218.772	3.55042	0.117525	422.14	7.78452	0.158569	82.7419	1.14032	0.0241838	8979.83	122.964	0.191628	BelowLOD	22.2467	41.8974
R33 - 3.d	30	BelowLOD	334.473	656.654	6.59035	1.6276	2.26981	460394	7233.68	0.721161	1.40353	0.201814	0.0162117	8.58512	0.670817	0.0494019	BelowLOD	6.52622	inf	4.45964	0.996092	0.264416	6.64468	1.11351	0.369451	1.427	0.233346	0.0453137	32.4736	1.9792	0.38241	144.222	4.05207	0.123265	238.109	4.47726	0.149748	478.93	7.64569	0.243788	93.0138	1.62919	0.0335196	8871.14	108.822	0.162727	BelowLOD	17.3547	38.6845
R33 - 4.d	30	BelowLOD	220.211	807.354	5.54202	1.53335	1.76055	465229	6777.75	0.644404	BelowLOD	0.0187719	0.0554217	5.23364	0.299844	0.0648163	BelowLOD	0.201623	inf	4.73846	0.834714	0.393352	6.28155	1.04469	0.353393	1.25413	0.221	0.117672	33.0281	2.59916	0.18666	155.447	4.18396	0.170638	295.197	4.25075	0.0800821	586.198	8.14524	0.222271	111.955	1.60268	0.0513818	8985.23	141.038	0.181036	BelowLOD	21.9693	47.5608
R33 - 5.d	30	BelowLOD	295.932	685.675	13.9161	3.74235	3.88319	459397	7972.28	0.535078	BelowLOD	0.0194647	0.0498173	4.40274	0.288402	0.0590047	BelowLOD	0.547614	3.48256	BelowLOD	0.329666	0.828861	2.03321	0.542188	0.3865	0.550758	0.160843	0.060352	12.8487	1.0245	0.368551	66.7128	2.48012	0.135637	120.126	2.67335	0.152389	257.654	5.40125	0.258482	54.3523	1.10306	0.0275148	8742.77	130.218	0.132383	48.0627	30.5516	41.5233
R33 - 6.d	30	BelowLOD	275.197	649.633	25.0204	5.73018	4.89396	469168	7562.55	0.637759	BelowLOD	0.000621345	0.0373408	5.27854	0.352567	0.056948	BelowLOD	0.170361	0.323204	2.42147	0.632422	0.419925	6.73086	0.966315	0.270247	1.53176	0.270181	0.0894356	37.586	2.36124	0.415235	141.654	4.78668	0.162384	222.136	7.80176	0.14227	425.266	12.3425	0.24768	83.2644	2.13642	0.0444144	8373.82	124.158	0.187006	188.964	126.68	142.535
R33 - 7.d	30	BelowLOD	220.077	531.07	9.59457	2.40697	3.17872	465501	8226.16	0.523764	BelowLOD	0.0215692	0.054962	5.65927	0.320487	0.0867977	BelowLOD	0.0783317	inf	4.2566	0.825208	0.350809	8.24934	1.11478	0.487347	1.63171	0.298429	0.0612126	41.1792	1.92381	0.335766	170.787	3.21923	0.1094	287.795	4.52861	0.122619	565.692	8.07797	0.171993	109.016	1.71598	0.0307627	8549.71	121.039	0.427024	617.022	443.102	412.331
R33 - 8.d	30	BelowLOD	287.473	628.131	13.6859	2.5269	2.5612	472407	8350.74	0.713879	BelowLOD	0.0147762	0.0230478	9.5156	0.539843	0.0733799	1.22223	0.268496	0.0438563	8.5001	1.34542	0.894011	16.1852	2.10191	0.437151	3.23905	0.321413	0.088179	87.2235	4.4047	0.272303	329.453	11.4936	0.192624	504.343	15.1689	0.11763	902.362	23.1322	0.243969	178.855	5.33415	0.0301693	7433.34	77.6775	0.221429	773.039	506.641	481.597
R33 - 9.d	30	BelowLOD	308.467	673.235	4.43362	2.13587	3.13708	475288	8315.26	0.926939	BelowLOD	0.000813467	0.00840771	3.63238	0.327406	0.0418507	BelowLOD	0.00901326	0.0353884	BelowLOD	0.256051	0.468864	1.15609	0.444137	0.63217	0.358362	0.118866	0.146203	9.93482	1.12915	0.413371	47.4565	1.49862	0.209966	108.5	2.87734	0.144719	242.572	3.60123	0.152394	53.4528	1.03069	0.0450998	9413.34	129.598	0.152896	BelowLOD	80.6056	240.129
R33 - 10.d	30	BelowLOD	304.693	720.753	9.69765	6.85623	8.42213	466156	8392.62	11.7757	BelowLOD	0.0294018	0.0499242	22.6798	0.925375	0.0435764	BelowLOD	0.448281	inf	8.25416	1.39596	0.453028	10.2511	1.0539	0.49776	3.73019	0.384458	0.119941	60.3316	2.20884	0.219541	269.799	4.29057	0.120809	564.67	8.52743	0.164763	1553.36	23.3466	0.347456	353.422	4.26521	0.0326059	11121.4	144.651	0.164355	BelowLOD	48.7722	145.996
R33 - 11.d	30	BelowLOD	256.091	828.578	11.8513	2.57178	3.05117	480301	8707.99	0.813441	BelowLOD	0.0173661	0.0404437	9.71549	0.533389	0.0388656	BelowLOD	0.095311	inf	9.54191	1.28894	0.451023	16.6375	2.0375	0.346099	3.0654	0.372639	0.0389367	84.4536	5.08655	0.26843	284.23	15.2879	0.113773	450.922	23.6591	0.145221	799.151	38.216	0.255804	141.755	6.59573	0.031074	7799.28	115.558	0.230555	BelowLOD	12.8938	35.3492
R33 - 12.d	30	BelowLOD	307.045	656.931	5.51641	1.79025	3.79384	465661	8667.4	0.608512	BelowLOD	0.00859379	0.0523907	6.8305	0.421327	0.0618786	BelowLOD	0.0600187	0.114472	2.3045	0.692994	0.550838	2.65229	0.613903	0.308146	0.772623	0.187348	0.0937689	18.2182	1.58209	0.384484	82.68	2.66671	0.250022	172.733	4.3601	0.134797	377.549	7.50206	0.153899	75.287	1.24538	0.0415007	9257.81	143.656	0.115052	BelowLOD	25.4709	45.478
R33 - 13.d	30	BelowLOD	372.523	681.904	6.80855	1.44424	2.54419	464873	9487.16	0.551801	1.68745	0.184564	0.0402679	15.5767	0.629179	0.0277425	BelowLOD	0.0968428	inf	10.8152	1.74943	0.248457	7.21867	1.2142	0.618974	1.20861	0.240302	0.0704917	41.2136	2.26883	0.415958	167.135	4.03584	0.13872	300.804	5.92873	0.0389323	608.534	8.81212	0.0875804	122.834	1.57545	0.0316368	8725.2	114.513	0.224855	BelowLOD	15.0029	34.5037
R33 - 14.d	30	BelowLOD	316.782	820.232	5.8757	1.59717	2.94817	467641	8525.92	0.386216	BelowLOD	0.0169371	0.0495786	5.62254	0.324781	0.05911	BelowLOD	0.0733876	inf	4.55301	0.951198	0.58447	6.58034	0.933183	0.123837	1.11067	0.191569	0.057013	29.5104	1.66307	0.348538	129.995	3.18484	0.149273	252.721	4.41457	0.0762103	516.596	6.8913	0.201204	104.131	1.21502	0.0305866	9432.65	128.325	0.175663	BelowLOD	11.8139	24.638
R33 - 15.d	30	BelowLOD	295.179	858.276	14.107	2.71896	3.75564	470869	10150.5	0.730192	BelowLOD	0.0145182	0.0777096	12.8372	0.574454	0.0582375	0.860628	0.194641	0.135293	13.8524	1.84615	0.435907	20.9627	2.05148	0.280231	3.99414	0.401316	0.0730149	99.9117	3.27876	0.30034	410.237	6.6419	0.184063	627.569	9.47257	0.118395	1127.2	13.7817	0.0828587	211.301	2.73061	0.0503133	7956.5	99.6045	0.284418	BelowLOD	34.7599	62.8633
R33 - 16.d	30	BelowLOD	293.035	635.036	15.172	4.15029	3.91277	465796	8971.66	0.39236	BelowLOD	0.00961552	0.016901	6.32531	0.335129	0.0716663	0.188336	0.0511223	0.112234	5.35042	0.885862	0.220292	8.88354	1.25098	0.583344	1.68295	0.20749	0.0693562	38.5006	1.98095	0.42254	172.785	3.77641	0.214111	316.099	5.19967	0.137046	605.664	9.45508	0.218406	124.97	2.17058	0.00661288	9006.83	119.648	0.199279	BelowLOD	32.0574	inf
R33 - 17.d	30	BelowLOD	266.375	864.058	17.8469	3.98097	4.20734	468291	7441.91	0.563508	BelowLOD	0.0133329	0.0459692	7.93837	0.459334	0.0449452	0.462621	0.180122	0.049803	5.65134	0.927507	0.255823	12.9428	1.50376	0.492078	2.71164	0.261079	0.0620925	64.0405	3.08189	0.260218	268.648	9.07846	0.2231	409.219	11.3321	0.117066	743.733	23.8193	0.157521	136.667	4.00773	0.0284022	7407.3	92.4771	0.126598	BelowLOD	20.0655	45.0201
R33 - 18.d	30	BelowLOD	248.856	481.439	17.1448	3.56148	4.59579	479483	8835.54	0.72295	BelowLOD	0.000771514	0.0529734	4.02714	0.348024	0.0588553	BelowLOD	0.0546286	0.0792558	0.385363	0.229333	0.232472	1.05447	0.415945	0.489565	0.422539	0.137492	0.0920248	9.88004	1.19273	0.264599	54.5371	1.88253	0.21783	109.752	2.55638	0.154841	250.107	5.47418	0.266024	48.6194	1.02528	0.0462485	9072.9	135.642	0.102361	BelowLOD	16.4077	37.027
Paton, C., Hellstrom, J., Paul, B.,Woodhead, J. and Hergt, J. (2011) Iolite: Freeware for the visualisation and processing of mass spectrometric data. Journal of Analytical Atomic Spectrometry. doi:10.1039/c1ja10172b.
Woodhead, J., Hellstrom, J., Hergt, J., Greig, A. & Maas, R (2007) Isotopic and elemental imaging of geological materials by laser ablation Inductively Coupled Plasma mass spectrometry. Journal of Geostandards and Geoanalytical Research, 31, p. 331-343.
[truncated: 15 more columns]

## Sheet: QAQC
Secondary Check
Default Accuracy Alarm Value	20
Default Accuracy Warning Value	15
Default Variation Alarm Value	30
Default Variation Warning Value	25
MaskBelowLOD	true
RefMat	G_NIST612
exceptions	{ }
Channel	Element	Measured	Accepted	% Diff	Variation (%RSD)	Minimum	Maximum	&#60; LOD	Calibrant
PbTotal_ppm	Pb	38.2767	38.57	-0.76	1.8	37.6609	38.8019	No	G_NIST610
Ca43_ppm	Ca	86115.9	85002	1.31	4.9	81905.6	88272.4	No	G_NIST610
Ti49_ppm	Ti	38.232	44	-13.11	19.89	33.1747	46.2197	No	G_NIST610
Zr91_ppm	Zr	38.762	37.9	2.27	10	34.8451	41.2721	No	G_NIST610
La139_ppm	La	36.0775	36	0.22	2.78	35.4041	36.9131	No	G_NIST610
Ce140_ppm	Ce	38.7296	38.4	0.86	4.41	37.3282	39.8552	No	G_NIST610
Pr141_ppm	Pr	37.6462	37.9	-0.67	3.45	36.8012	38.5085	No	G_NIST610
Nd146_ppm	Nd	35.2103	35.5	-0.82	8.04	32.5843	37.3646	No	G_NIST610
Sm147_ppm	Sm	37.0912	37.7	-1.61	7.24	34.7131	39.8798	No	G_NIST610
Eu153_ppm	Eu	35.5111	35.6	-0.25	5.05	33.8672	37.0508	No	G_NIST610
Gd157_ppm	Gd	38.4207	37.3	3	8	36.121	40.8964	No	G_NIST610
Dy163_ppm	Dy	36.0257	35.5	1.48	5.4	34.5387	38.0105	No	G_NIST610
Er166_ppm	Er	38.3906	38	1.03	3.94	36.966	39.7639	No	G_NIST610
Yb172_ppm	Yb	38.9642	39.2	-0.6	8.83	36.5425	41.7017	No	G_NIST610
Lu175_ppm	Lu	36.8141	37	-0.5	3.84	35.6827	37.8698	No	G_NIST610
Hf178_ppm	Hf	38.2747	36.7	4.29	6.21	36.2558	40.8493	No	G_NIST610
Pb204_ppm	Pb	39.853	38.57	3.33	17.16	34.8151	44.2493	No	G_NIST610
Pb206_ppm	Pb	38.3013	38.57	-0.7	4.52	36.8246	40.0934	No	G_NIST610
Pb207_ppm	Pb	37.9033	38.57	-1.73	1.97	37.1557	38.4543	No	G_NIST610
Pb208_ppm	Pb	38.263	38.57	-0.8	2.94	37.4201	39.1451	No	G_NIST610
Th232_ppm	Th	37.4482	37.79	-0.9	3.17	36.186	38.3615	No	G_NIST610
U238_ppm	U	37.2094	37.38	-0.46	3.12	36.3199	38.0913	No	G_NIST610
Sum of Abs % Diffs				40.6952
