# Supplementary material for: Effect of chemical abrasion of zircon on SIMS U–Pb, δ 18 O, trace element, and LA-ICPMS trace element and Lu–Hf isotopic analyses
Source: Copernicus journal article supplement (doi:10.5194/gchron-6-337-2024), 2024-07-10
Supplement: Supplementary file 4 [file Table S12-LASS-Yb-Lu-Hf-isotopes-sum.xlsx]

## Sheet: S10-Spot eHf calc (CorrLu)
Nd- and Hf-isotopes calculator
Calculation constants - change if required
Sm/Nd		Lu/Hf
DM_147SM_144ND	0.2136	DM_LU176_HF177	0.0384
DM_143ND_144ND	0.513163	DM_HF176_HF177	0.28325
CHUR_147SM_144ND	0.1967	CHUR_LU176_HF177	0.0336
CHUR_143ND_144ND	0.51265	CHUR_HF176_HF177	0.282785
DECAY_CONST_147SM_144ND	6.54e-12	DECAY_CONSTANT	1.865e-11
PARTS_PER_10000_CONVERT	10000	PARTS_PER_10000_CONVERT	10000
MILLION_YEARS	1000000	MILLION_YEARS	1000000
CC_SM147_ND144	0.11	CC_LU176_HF177	0.015
INPUT VALUES	MEASURED VALUES	StdCorr_Hf176_177_2SE(int)			CALCULATED VALUES
ANALYSIS_LABEL	HF176_HF177		LU176_HF177	HF_NORMALISED_AGE_MA	HF176_HF177_INITIAL_NORMALISED		EHFT_NORMALISED		TDM_NORMALISED_MA	T2DM_NORMALISED_MA
COG1 - 1	0.280616	2.25446e-05	0.000845603	3467	0.280559	2.25446e-05	0.662101	0.803558	3635.11	3736.55
COG1 - 2	0.280667	3.43187e-05	0.00111745	3467	0.280592	3.43187e-05	1.83196	1.22308	3592.21	3666.36
COG1 - 3	0.280609	2.84448e-05	0.000959355	3467	0.280545	2.84448e-05	0.166553	1.01391	3654.22	3766.25
COG1 - 4	0.280644	2.53713e-05	0.000934281	3467	0.280581	2.53713e-05	1.45402	0.904238	3605.79	3689.04
COG1 - 5	0.280629	2.49495e-05	0.0012176	3467	0.280548	2.49495e-05	0.257576	0.889313	3652.08	3760.79
COG1 - 6	0.280635	2.24354e-05	0.00106722	3467	0.280564	2.24354e-05	0.839439	0.799652	3629.43	3725.91
COG1 - 7	0.280674	1.76564e-05	0.00136872	3467	0.280582	1.76564e-05	1.48508	0.629276	3606.24	3687.18
COG1 - 8	0.280611	2.47296e-05	0.000682807	3467	0.280565	2.47296e-05	0.868324	0.881423	3626.7	3724.18
COG1 - 9	0.280652	2.40944e-05	0.00143486	3467	0.280556	2.40944e-05	0.556602	0.858809	3641.8	3742.87
COG1 - 10	0.280654	2.40213e-05	0.00106972	3467	0.280582	2.40213e-05	1.48717	0.856124	3605.04	3687.05
COG1 - 11	0.280591	1.84262e-05	0.000742478	3467	0.280541	1.84262e-05	0.018055	0.656809	3658.69	3775.15
COG1 - 12	0.280629	2.49351e-05	0.00108341	3467	0.280557	2.49351e-05	0.57883	0.88877	3639.32	3741.54
COG1 - 13	0.28065	3.44777e-05	0.000902846	3467	0.28059	3.44777e-05	1.7452	1.22876	3594.75	3671.57
COG1 - 14	0.280609	2.61586e-05	0.00106547	3467	0.280538	2.61586e-05	-0.109108	0.932445	3665.13	3782.76
COG1 - 15	0.280616	3.33041e-05	0.000855898	3467	0.280559	3.33041e-05	0.653861	1.18706	3635.47	3737.04
COG1 - 16	0.280595	2.1816e-05	0.000900056	3467	0.280535	2.1816e-05	-0.217854	0.777657	3668.33	3789.28
COG1 - 17	0.28064	2.22106e-05	0.00124073	3467	0.280557	2.22106e-05	0.573975	0.791663	3640.23	3741.83
COG1 - 18	0.280594	2.65824e-05	0.000926408	3467	0.280532	2.65824e-05	-0.313151	0.947573	3672.04	3794.99
COG1 - 19	0.280657	3.38022e-05	0.000769552	3467	0.280606	3.38022e-05	2.31119	1.20462	3573.14	3637.58
COG1 - 20	0.280616	2.22129e-05	0.00067116	3467	0.280571	2.22129e-05	1.08465	0.791704	3618.59	3711.2
COG1 - 21	0.280657	2.18034e-05	0.00137939	3467	0.280564	2.18034e-05	0.845094	0.777126	3630.58	3725.57
COG1 - 22	0.280659	2.50321e-05	0.00111128	3467	0.280584	2.50321e-05	1.55917	0.892141	3602.48	3682.73
COG1 - 23	0.280646	2.71681e-05	0.00132201	3467	0.280557	2.71681e-05	0.597524	0.96836	3639.72	3740.42
COG1 - 24	0.280598	1.7443e-05	0.000820839	3467	0.280543	1.7443e-05	0.0941558	0.621757	3656.24	3770.59
COG1 - 25	0.280624	2.1743e-05	0.000673545	3467	0.280579	2.1743e-05	1.35861	0.774934	3608.39	3694.77
COG1 - 26	0.280654	2.66437e-05	0.0012746	3467	0.280569	2.66437e-05	1.00716	0.94963	3623.99	3715.85
COG1 - 27	0.280668	2.76938e-05	0.000889692	3467	0.280608	2.76938e-05	2.40802	0.986921	3569.84	3631.76
COG1 - 28	0.280642	2.54967e-05	0.00115924	3467	0.280564	2.54967e-05	0.834919	0.908765	3630	3726.18
COG1 - 29	0.280605	2.49883e-05	0.000934987	3467	0.280543	2.49883e-05	0.0798836	0.890712	3657.35	3771.44
COG1 - 30	0.280675	2.22468e-05	0.00147085	3467	0.280577	2.22468e-05	1.30017	0.792895	3613.66	3698.28
Group Stats	0.280634	9.31975e-06	0.00102973	3467	0.280565	9.31975e-06	0.867306	0.332178	3628.22	3724.24
CQGN				1852
CQGN - 1	0.281595	1.85437e-05	0.000480931	1852	0.281578	1.85437e-05	-0.915073	0.658561	2290.18	2560.27
CQGN - 2	0.281596	2.27743e-05	0.000699675	1852	0.281571	2.27743e-05	-1.17663	0.80883	2302.75	2576.36
CQGN - 3	0.281604	2.47495e-05	0.000531289	1852	0.281585	2.47495e-05	-0.668704	0.878934	2281.35	2545.11
CQGN - 4	0.281613	1.81796e-05	0.000598578	1852	0.281592	1.81796e-05	-0.4359	0.645599	2273.2	2530.78
CQGN - 5	0.281608	2.56801e-05	0.000516702	1852	0.28159	2.56801e-05	-0.502719	0.911968	2274.84	2534.9
CQGN - 6	0.281592	2.31167e-05	0.000540978	1852	0.281573	2.31167e-05	-1.10984	0.820983	2298.32	2572.25
CQGN - 7	0.281607	2.42235e-05	0.000443318	1852	0.281592	2.42235e-05	-0.43988	0.860233	2271.63	2531.03
CQGN - 8	0.281623	1.98683e-05	0.000908915	1852	0.281591	1.98683e-05	-0.462735	0.705574	2277.7	2532.44
CQGN - 9	0.281606	1.96722e-05	0.000879121	1852	0.281576	1.96722e-05	-1.01821	0.698649	2298.79	2566.61
CQGN - 10	0.281605	2.70024e-05	0.000542079	1852	0.281586	2.70024e-05	-0.648508	0.95894	2280.7	2543.87
CQGN - 11	0.281599	2.89243e-05	0.000777839	1852	0.281572	2.89243e-05	-1.1576	1.02725	2302.95	2575.19
CQGN - 12	0.281584	2.23772e-05	0.000488059	1852	0.281567	2.23772e-05	-1.33179	0.79474	2306.16	2585.9
CQGN - 13	0.281625	3.15249e-05	0.0008984	1852	0.281594	3.15249e-05	-0.370125	1.11952	2274.01	2526.74
CQGN - 14	0.281587	1.97082e-05	0.000699669	1852	0.281563	1.97082e-05	-1.47294	0.699958	2314.12	2594.58
CQGN - 15	0.2816	1.83036e-05	0.0006202	1852	0.281578	1.83036e-05	-0.915289	0.650036	2291.8	2560.28
CQGN - 16	0.281599	2.81711e-05	0.000752352	1852	0.281572	2.81711e-05	-1.12937	1.00049	2301.56	2573.45
CQGN - 17	0.281603	2.06951e-05	0.000659204	1852	0.28158	2.06951e-05	-0.866505	0.734964	2290.38	2557.28
CQGN - 18	0.281614	2.19427e-05	0.000513931	1852	0.281596	2.19427e-05	-0.288273	0.779227	2266.62	2521.7
CQGN - 19	0.281614	2.45893e-05	0.000549014	1852	0.281595	2.45893e-05	-0.329645	0.873214	2268.58	2524.24
CQGN - 20	0.281596	2.2977e-05	0.000565731	1852	0.281576	2.2977e-05	-0.990495	0.816014	2294.04	2564.91
CQGN - 21	0.281644	2.92226e-05	0.000932008	1852	0.281611	2.92226e-05	0.247694	1.03769	2250.52	2488.69
CQGN - 22	0.281609	2.67644e-05	0.00071093	1852	0.281584	2.67644e-05	-0.705619	0.950493	2284.8	2547.38
CQGN - 23	0.281603	2.13233e-05	0.000542929	1852	0.281584	2.13233e-05	-0.720711	0.757261	2283.47	2548.31
CQGN - 24	0.281597	2.53437e-05	0.000817005	1852	0.281568	2.53437e-05	-1.26736	0.900092	2307.64	2581.94
CQGN - 25	0.281616	2.1662e-05	0.000559237	1852	0.281597	2.1662e-05	-0.263458	0.769257	2266.16	2520.17
CQGN - 26	0.281574	3.06281e-05	0.00050983	1852	0.281556	3.06281e-05	-1.69913	1.08781	2320.44	2608.48
CQGN - 27	0.281589	2.30275e-05	0.00056384	1852	0.281569	2.30275e-05	-1.25465	0.81783	2304.12	2581.16
CQGN - 28	0.281607	2.35243e-05	0.000884619	1852	0.281576	2.35243e-05	-0.992839	0.835451	2297.87	2565.05
CQGN - 29	0.281612	2.07231e-05	0.000907799	1852	0.28158	2.07231e-05	-0.870551	0.735959	2293.43	2557.53
CQGN - 30	0.281607	2.33562e-05	0.000674374	1852	0.281583	2.33562e-05	-0.754824	0.829462	2286.27	2550.41
Group Stats	0.281604	4.91877e-06	0.000658952	1852	0.281581	4.91877e-06	-0.817056	0.174684	2288.48	2554.24
CTEM
CTEM - 1	0.28268	2.53316e-05	0.00101686	417	0.282672	2.53316e-05	5.27134	0.896149	812.043	1046.73
CTEM - 2	0.282686	2.5438e-05	0.00116918	417	0.282677	2.5438e-05	5.47399	0.899895	805.531	1033.86
CTEM - 3	0.2827	2.01447e-05	0.00170056	417	0.282687	2.01447e-05	5.80749	0.712615	797.575	1012.68
CTEM - 4	0.282665	2.92292e-05	0.000716757	417	0.28266	2.92292e-05	4.84897	1.03408	825.631	1073.53
CTEM - 5	0.282704	3.82165e-05	0.00102647	417	0.282695	3.82165e-05	6.11706	1.35186	778.369	993.008
CTEM - 6	0.282727	4.23949e-05	0.00124711	417	0.282717	4.23949e-05	6.89213	1.49955	749.353	943.73
CTEM - 7	0.282736	2.72645e-05	0.00183747	417	0.282722	2.72645e-05	7.0521	0.964356	748.166	933.553
CTEM - 8	0.282689	2.20567e-05	0.00118925	417	0.282679	2.20567e-05	5.541	0.780272	803.052	1029.6
CTEM - 9	0.28271	2.70163e-05	0.00128628	417	0.2827	2.70163e-05	6.27173	0.955654	774.668	983.177
CTEM - 10	0.282658	2.47945e-05	0.000964326	417	0.28265	2.47945e-05	4.50937	0.877215	841.852	1095.08
CTEM - 11	0.282694	2.3578e-05	0.0018815	417	0.282679	2.3578e-05	5.54981	0.834088	809.984	1029.04
CTEM - 12	0.282714	3.0824e-05	0.00204031	417	0.282698	3.0824e-05	6.19108	1.09035	785.371	988.304
CTEM - 13	0.282729	2.43873e-05	0.00173734	417	0.282715	2.43873e-05	6.82116	0.862611	756.674	948.244
CTEM - 14	0.282704	2.33157e-05	0.00121353	417	0.282694	2.33157e-05	6.07468	0.824768	781.882	995.701
CTEM - 15	0.282729	3.21205e-05	0.00081465	417	0.282723	3.21205e-05	7.08135	1.13611	738.019	931.692
CTEM - 16	0.282728	2.51142e-05	0.00246041	417	0.282709	2.51142e-05	6.58801	0.888342	773.174	963.071
CTEM - 17	0.282716	2.27205e-05	0.00171393	417	0.282702	2.27205e-05	6.35712	0.80369	775.348	977.75
CTEM - 18	0.282671	2.97515e-05	0.00131535	417	0.282661	2.97515e-05	4.90108	1.05255	830.105	1070.23
CTEM - 19	0.28268	2.69917e-05	0.000866502	417	0.282674	2.69917e-05	5.34143	0.954872	807.679	1042.28
CTEM - 20	0.282702	2.40626e-05	0.00184104	417	0.282688	2.40626e-05	5.84745	0.851206	797.401	1010.14
CTEM - 21	0.282684	2.32586e-05	0.00169955	417	0.282671	2.32586e-05	5.24477	0.822816	820.444	1048.41
CTEM - 22	0.282699	2.65739e-05	0.0016593	417	0.282686	2.65739e-05	5.76616	0.94005	798.828	1015.3
CTEM - 23	0.28272	2.1223e-05	0.00190185	417	0.282705	2.1223e-05	6.47046	0.75071	772.55	970.545
CTEM - 24	0.28269	2.56836e-05	0.00163951	417	0.282677	2.56836e-05	5.45508	0.908584	811.251	1035.06
CTEM - 25	0.28274	2.40209e-05	0.00206189	417	0.282724	2.40209e-05	7.11918	0.849623	747.448	929.285
CTEM - 26	0.282683	2.59025e-05	0.00185828	417	0.282669	2.59025e-05	5.16317	0.916355	825.521	1053.59
CTEM - 27	0.282671	2.77945e-05	0.000956232	417	0.282664	2.77945e-05	4.99224	0.983306	822.526	1064.44
CTEM - 28	0.282699	2.10042e-05	0.00146148	417	0.282688	2.10042e-05	5.83736	0.743018	793.913	1010.78
CTEM - 29	0.282682	2.61079e-05	0.00120484	417	0.282673	2.61079e-05	5.31995	0.92361	812.082	1043.64
CTEM - 30	0.282656	2.19114e-05	0.000746323	417	0.28265	2.19114e-05	4.49953	0.775213	839.792	1095.7
Group Stats	0.282698	8.50149e-06	0.00144094	417	0.282687	8.50149e-06	5.81354	0.300739	794.666	1012.29
NOG1
NOG1 - 1	0.280623	2.32956e-05	0.00116377	3467	0.280545	2.32956e-05	0.147081	0.830371	3655.98	3767.42
NOG1 - 2	0.280677	2.70753e-05	0.00155002	3467	0.280573	2.70753e-05	1.15162	0.965	3619.65	3707.19
NOG1 - 3	0.280689	4.47894e-05	0.00133442	3467	0.2806	4.47894e-05	2.12574	1.5962	3581.79	3648.72
NOG1 - 4	0.280635	2.69604e-05	0.00114006	3467	0.280559	2.69604e-05	0.63651	0.960954	3637.4	3738.08
NOG1 - 5	0.280639	2.63149e-05	0.00127456	3467	0.280554	2.63149e-05	0.485902	0.937962	3643.72	3747.11
NOG1 - 6	0.280621	2.76721e-05	0.00128701	3467	0.280535	2.76721e-05	-0.187013	0.986402	3669.26	3787.43
NOG1 - 7	0.280599	2.78887e-05	0.000794974	3467	0.280546	2.78887e-05	0.177306	0.994087	3653	3765.6
NOG1 - 8	0.280656	2.51529e-05	0.00128663	3467	0.28057	2.51529e-05	1.05765	0.896493	3622.12	3712.82
NOG1 - 9	0.28062	2.58264e-05	0.000965474	3467	0.280555	2.58264e-05	0.525727	0.920545	3640.77	3744.72
NOG1 - 10	0.280629	2.78805e-05	0.00105323	3467	0.280559	2.78805e-05	0.647805	0.993749	3636.58	3737.4
NOG1 - 11	0.280647	2.2719e-05	0.00116254	3467	0.280569	2.2719e-05	1.00957	0.809746	3623.42	3715.71
NOG1 - 12	0.280605	2.4205e-05	0.000732412	3467	0.280556	2.4205e-05	0.562843	0.86275	3638.31	3742.5
NOG1 - 13	0.280603	3.0389e-05	0.00063239	3467	0.28056	3.0389e-05	0.706993	1.08315	3632.49	3733.85
NOG1 - 14	0.280626	2.2548e-05	0.00134976	3467	0.280536	2.2548e-05	-0.179186	0.803747	3669.3	3786.96
NOG1 - 15	0.280698	2.32608e-05	0.00205911	3467	0.280561	2.32608e-05	0.721245	0.82908	3638.43	3733
NOG1 - 16	0.280607	3.09766e-05	0.00107053	3467	0.280536	3.09766e-05	-0.168187	1.10419	3667.38	3786.3
NOG1 - 17	0.28066	2.55445e-05	0.00129465	3467	0.280574	2.55445e-05	1.18262	0.910439	3617.42	3705.33
NOG1 - 18	0.280638	2.72116e-05	0.00118062	3467	0.280559	2.72116e-05	0.655386	0.969906	3636.88	3736.95
NOG1 - 19	0.280587	2.21473e-05	0.000835677	3467	0.280531	2.21473e-05	-0.350844	0.789477	3672.96	3797.24
NOG1 - 20	0.280633	2.30541e-05	0.000903802	3467	0.280573	2.30541e-05	1.15428	0.821677	3616.92	3707.03
NOG1 - 21	0.280598	2.32623e-05	0.000763841	3467	0.280547	2.32623e-05	0.228621	0.829178	3650.93	3762.53
NOG1 - 22	0.280703	1.92602e-05	0.00189086	3467	0.280577	1.92602e-05	1.29286	0.686448	3615.63	3698.71
NOG1 - 23	0.280623	2.24201e-05	0.00101009	3467	0.280555	2.24201e-05	0.526158	0.799132	3640.96	3744.7
NOG1 - 24	0.280601	1.7127e-05	0.000812114	3467	0.280547	1.7127e-05	0.230096	0.610485	3651.12	3762.44
NOG1 - 25	0.280635	2.67988e-05	0.00134877	3467	0.280545	2.67988e-05	0.143319	0.955243	3657.07	3767.64
NOG1 - 26	0.280587	2.57908e-05	0.00076806	3467	0.280536	2.57908e-05	-0.170998	0.919339	3665.88	3786.47
NOG1 - 27	0.280631	2.52611e-05	0.00128917	3467	0.280545	2.52611e-05	0.166729	0.900429	3655.88	3766.24
NOG1 - 28	0.280647	2.39959e-05	0.00125103	3467	0.280563	2.39959e-05	0.806418	0.855277	3631.48	3727.89
NOG1 - 29	0.280624	2.14535e-05	0.000967438	3467	0.280559	2.14535e-05	0.666729	0.76467	3635.48	3736.27
NOG1 - 30	0.280566	2.88903e-05	0.000696587	3467	0.28052	2.88903e-05	-0.741981	1.02988	3686.77	3820.66
Group Stats	0.28063	1.19177e-05	0.00112899	3467	0.280555	1.19177e-05	0.507033	0.424791	3642.24	3745.84
NQGN
NQGN - 1	0.281618	2.7512e-05	0.000975654	1852	0.281584	2.7512e-05	-0.730585	0.977046	2288.82	2548.92
NQGN - 2	0.281608	2.95786e-05	0.000768009	1852	0.281581	2.95786e-05	-0.831554	1.05045	2290.3	2555.13
NQGN - 3	0.281617	2.48848e-05	0.000540157	1852	0.281598	2.48848e-05	-0.231492	0.8837	2264.73	2518.2
NQGN - 4	0.2816	2.13299e-05	0.00069481	1852	0.281575	2.13299e-05	-1.02103	0.75752	2296.72	2566.79
NQGN - 5	0.281626	2.28004e-05	0.00102698	1852	0.28159	2.28004e-05	-0.507033	0.809704	2280.76	2535.16
NQGN - 6	0.281617	2.52718e-05	0.00077567	1852	0.28159	2.52718e-05	-0.499254	0.897468	2277.61	2534.68
NQGN - 7	0.281601	2.77592e-05	0.000873687	1852	0.28157	2.77592e-05	-1.198	0.98587	2305.65	2577.67
NQGN - 8	0.281621	2.57343e-05	0.000898402	1852	0.281589	2.57343e-05	-0.534001	0.913896	2280.34	2536.82
NQGN - 9	0.28163	2.42997e-05	0.000598221	1852	0.281609	2.42997e-05	0.164409	0.862888	2250.2	2493.82
NQGN - 10	0.281583	2.39959e-05	0.000498029	1852	0.281566	2.39959e-05	-1.36759	0.852232	2307.65	2588.1
NQGN - 11	0.281611	2.39439e-05	0.000655354	1852	0.281588	2.39439e-05	-0.586137	0.850318	2279.59	2540.03
NQGN - 12	0.281583	2.41282e-05	0.000453553	1852	0.281568	2.41282e-05	-1.30146	0.856923	2304.6	2584.04
NQGN - 13	0.28159	2.70786e-05	0.000346076	1852	0.281578	2.70786e-05	-0.924773	0.961672	2289	2560.87
NQGN - 14	0.281597	2.31394e-05	0.000829097	1852	0.281567	2.31394e-05	-1.30685	0.821805	2309.31	2584.37
NQGN - 15	0.281614	2.01013e-05	0.000649832	1852	0.281592	2.01013e-05	-0.445348	0.713847	2274.13	2531.37
NQGN - 16	0.281625	2.12025e-05	0.000553444	1852	0.281606	2.12025e-05	0.0519835	0.752913	2254.04	2500.75
NQGN - 17	0.281608	2.27241e-05	0.000624337	1852	0.281586	2.27241e-05	-0.66134	0.807006	2282.12	2544.66
NQGN - 18	0.281624	2.73455e-05	0.000689835	1852	0.2816	2.73455e-05	-0.143678	0.971077	2263	2512.79
NQGN - 19	0.281623	2.73861e-05	0.000510701	1852	0.281605	2.73861e-05	0.0393113	0.972501	2254.07	2501.53
NQGN - 20	0.281595	2.78928e-05	0.000455004	1852	0.281579	2.78928e-05	-0.904145	0.990586	2289.47	2559.6
NQGN - 21	0.281618	2.02052e-05	0.000660377	1852	0.281595	2.02052e-05	-0.341411	0.717529	2270.26	2524.97
NQGN - 22	0.281616	2.45142e-05	0.000570511	1852	0.281596	2.45142e-05	-0.299805	0.870547	2267.68	2522.41
NQGN - 23	0.281606	2.0737e-05	0.000607274	1852	0.281585	2.0737e-05	-0.689316	0.736438	2283	2546.38
NQGN - 24	0.281597	1.63832e-05	0.00037093	1852	0.281583	1.63832e-05	-0.735157	0.581823	2282.07	2549.2
NQGN - 25	0.281594	2.68597e-05	0.000470994	1852	0.281577	2.68597e-05	-0.95582	0.953903	2291.62	2562.78
NQGN - 26	0.281599	1.70908e-05	0.000494685	1852	0.281581	1.70908e-05	-0.805765	0.606959	2286.17	2553.55
NQGN - 27	0.281684	3.59149e-05	0.00115193	1852	0.281644	3.59149e-05	1.40775	1.27519	2207.75	2417.18
NQGN - 28	0.281626	2.43885e-05	0.000777603	1852	0.281599	2.43885e-05	-0.182987	0.86607	2265.46	2515.21
NQGN - 29	0.28158	2.08547e-05	0.000397589	1852	0.281566	2.08547e-05	-1.36213	0.74067	2306.24	2587.77
NQGN - 30	0.281611	2.36749e-05	0.000536489	1852	0.281592	2.36749e-05	-0.432975	0.840751	2272.4	2530.6
Group Stats	0.281611	7.2204e-06	0.000648508	1852	0.281588	7.2204e-06	-0.577872	0.256417	2279.19	2539.52
NTEM
NTEM - 1	0.282703	2.69358e-05	0.00152179	417	0.282691	2.69358e-05	5.94958	0.952837	789.986	1003.65
NTEM - 2	0.282724	2.41893e-05	0.00107714	417	0.282716	2.41893e-05	6.82622	0.855604	750.482	947.922
NTEM - 3	0.282672	2.11199e-05	0.00137408	417	0.282661	2.11199e-05	4.8906	0.747182	831.18	1070.89
NTEM - 4	0.282662	3.49597e-05	0.00141975	417	0.282651	3.49597e-05	4.53208	1.23685	846.148	1093.64
NTEM - 5	0.282721	2.77337e-05	0.00148654	417	0.28271	2.77337e-05	6.61487	0.980994	762.72	961.362
NTEM - 6	0.282685	2.77556e-05	0.001525	417	0.282673	2.77556e-05	5.32734	0.981898	815.2	1043.17
NTEM - 7	0.282701	4.7126e-05	0.00122767	417	0.282691	4.7126e-05	5.97169	1.66705	786.157	1002.25
NTEM - 8	0.282687	2.68305e-05	0.00133153	417	0.282677	2.68305e-05	5.45632	0.949158	807.938	1034.98
NTEM - 9	0.282702	2.7318e-05	0.00123082	417	0.282693	2.7318e-05	6.01389	0.966351	784.493	999.564
NTEM - 10	0.282736	2.91462e-05	0.00186316	417	0.282721	2.91462e-05	7.02161	1.03092	749.645	935.493
NTEM - 11	0.282695	1.91332e-05	0.00110735	417	0.282686	1.91332e-05	5.78246	0.676836	792.544	1014.27
NTEM - 12	0.282692	2.5669e-05	0.00131845	417	0.282681	2.5669e-05	5.61683	0.908053	801.341	1024.79
NTEM - 13	0.282695	2.10562e-05	0.00110725	417	0.282686	2.10562e-05	5.777	0.744862	792.761	1014.61
NTEM - 14	0.282711	2.75075e-05	0.00107418	417	0.282703	2.75075e-05	6.36574	0.97302	768.881	977.202
NTEM - 15	0.282702	2.15991e-05	0.00139514	417	0.282692	2.15991e-05	5.97827	0.764053	787.556	1001.83
NTEM - 16	0.28273	2.14021e-05	0.00172859	417	0.282716	2.14021e-05	6.85096	0.757017	755.38	946.348
NTEM - 17	0.282667	2.45224e-05	0.00130548	417	0.282657	2.45224e-05	4.74231	0.867567	836.379	1080.3
NTEM - 18	0.282666	2.163e-05	0.00103377	417	0.282658	2.163e-05	4.78874	0.765236	831.488	1077.36
NTEM - 19	0.282687	2.44747e-05	0.00133705	417	0.282677	2.44747e-05	5.45192	0.865819	808.173	1035.26
NTEM - 20	0.282706	2.39544e-05	0.000941229	417	0.282699	2.39544e-05	6.22796	0.847346	773.129	985.96
NTEM - 21	0.282668	2.78925e-05	0.00101994	417	0.28266	2.78925e-05	4.87269	0.986786	827.986	1072.03
NTEM - 22	0.282686	3.61072e-05	0.00121339	417	0.282677	3.61072e-05	5.45888	1.27733	806.598	1034.82
NTEM - 23	0.282676	2.19454e-05	0.00102034	417	0.282668	2.19454e-05	5.14398	0.776368	817.163	1054.81
NTEM - 24	0.282685	2.40759e-05	0.000911781	417	0.282678	2.40759e-05	5.50255	0.851707	801.736	1032.05
NTEM - 25	0.282765	6.12338e-05	0.000697998	417	0.28276	6.12338e-05	8.39591	2.16557	684.905	847.991
NTEM - 26	0.282677	2.31776e-05	0.00113654	417	0.282668	2.31776e-05	5.15871	0.819956	817.816	1053.88
NTEM - 27	0.28268	2.79858e-05	0.00124644	417	0.28267	2.79858e-05	5.21527	0.99005	816.726	1050.29
NTEM - 28	0.282755	3.06582e-05	0.00240532	417	0.282736	3.06582e-05	7.55837	1.08434	732.361	901.334
NTEM - 29	0.282662	3.0719e-05	0.000544993	417	0.282657	3.0719e-05	4.77203	1.08679	826.815	1078.42
NTEM - 30	0.282684	2.50325e-05	0.000772931	417	0.282678	2.50325e-05	5.48951	0.885551	800.838	1032.87
Group Stats	0.282696	9.58934e-06	0.00124585	417	0.282686	9.58934e-06	5.79181	0.339222	793.563	1013.67
C915
C915 - 1	0.282454	0.000172517	0.000390069	1063	0.282446	0.000172517	11.8372	6.10796	1111.31	1141.45
C915 - 2	0.282324	2.87016e-05	0.000357763	1063	0.282317	2.87016e-05	7.24622	1.01664	1289.78	1431.2
C915 - 3	0.282302	2.71612e-05	0.000398898	1063	0.282294	2.71612e-05	6.44391	0.962159	1321.19	1481.67
C915 - 4	0.282431	6.88137e-05	0.000393919	1063	0.282423	6.88137e-05	11.0074	2.43655	1143.65	1193.94
C915 - 5	0.282332	3.74541e-05	0.000398915	1063	0.282324	3.74541e-05	7.50049	1.32664	1280.14	1415.19
C915 - 6	0.282345	2.79866e-05	0.000406843	1063	0.282337	2.79866e-05	7.97525	0.991248	1261.73	1385.29
C915 - 7	0.282322	3.99324e-05	0.00035491	1063	0.282315	3.99324e-05	7.18307	1.41446	1292.21	1435.17
C915 - 8	0.282287	2.53253e-05	0.000321562	1063	0.28228	2.53253e-05	5.95923	0.897169	1339.45	1512.14
C915 - 9	0.282307	2.58323e-05	0.000439086	1063	0.282298	2.58323e-05	6.58644	0.915072	1315.92	1472.71
C915 - 10	0.282267	2.76388e-05	0.00033525	1063	0.282261	2.76388e-05	5.2591	0.979195	1366.68	1556.12
C915 - 11	0.282338	4.7151e-05	0.000423557	1063	0.282329	4.7151e-05	7.6889	1.67007	1272.95	1403.33
C915 - 12	0.282305	3.02819e-05	0.000334975	1063	0.282298	3.02819e-05	6.59843	1.07269	1314.77	1471.95
C915 - 13	0.282299	3.21014e-05	0.000356657	1063	0.282292	3.21014e-05	6.37535	1.13717	1323.57	1485.98
C915 - 14	0.282364	4.44554e-05	0.000443998	1063	0.282355	4.44554e-05	8.61258	1.57445	1237.11	1345.13
C915 - 15	0.282303	2.39448e-05	0.000441687	1063	0.282295	2.39448e-05	6.46439	0.848221	1320.69	1480.38
C915 - 16	0.282292	2.89566e-05	0.000345495	1063	0.282285	2.89566e-05	6.11005	1.0258	1333.78	1502.66
C915 - 17	0.282307	3.20922e-05	0.000368496	1063	0.282299	3.20922e-05	6.63327	1.13682	1313.64	1469.76
C915 - 18	0.282298	2.8283e-05	0.000345435	1063	0.282291	2.8283e-05	6.34085	1.00191	1324.83	1488.15
C915 - 19	0.282283	2.60437e-05	0.000341129	1063	0.282276	2.60437e-05	5.82231	0.922631	1344.9	1520.74
C915 - 20	0.282288	3.15387e-05	0.00041445	1063	0.28228	3.15387e-05	5.95174	1.11728	1340.42	1512.61
C915 - 21	0.28236	4.71616e-05	0.000338256	1063	0.282353	4.71616e-05	8.53081	1.67031	1239.8	1350.28
C915 - 22	0.282321	3.12217e-05	0.000345407	1063	0.282314	3.12217e-05	7.1572	1.10592	1293.16	1436.8
C915 - 23	0.282271	3.26077e-05	0.000337867	1063	0.282264	3.26077e-05	5.38584	1.15522	1361.79	1548.16
C915 - 24	0.282376	8.00002e-05	0.000437235	1063	0.282367	8.00002e-05	9.02644	2.8332	1220.96	1319.03
C915 - 25	0.282341	5.58386e-05	0.000391078	1063	0.282333	5.58386e-05	7.83235	1.97776	1267.2	1394.29
C915 - 26	0.282283	3.51073e-05	0.00033476	1063	0.282276	3.51073e-05	5.81404	1.24372	1345.17	1521.26
C915 - 27	0.282318	3.97555e-05	0.000354679	1063	0.282311	3.97555e-05	7.03193	1.40822	1298.08	1444.68
C915 - 28	0.28231	6.38684e-05	0.000236669	1063	0.282305	6.38684e-05	6.84047	2.26239	1304.76	1456.73
C915 - 30	0.282293	2.83963e-05	0.000393037	1063	0.282285	2.83963e-05	6.13591	1.00594	1333.11	1501.03
Group Stats	0.282321	1.60092e-05	0.000371796	1063	0.282314	1.60092e-05	7.15004	0.56707	1293.6	1437.25
N915
N915 - 1	0.282301	2.951e-05	0.000297479	1063	0.282295	2.951e-05	6.46265	1.04536	1319.78	1480.49
N915 - 2	0.282313	2.77994e-05	0.000297136	1063	0.282307	2.77994e-05	6.88859	0.984722	1303.28	1453.7
N915 - 3	0.282278	3.42645e-05	0.000295704	1063	0.282272	3.42645e-05	5.67477	1.21388	1350.28	1530.01
N915 - 4	0.282311	3.40684e-05	0.00026645	1063	0.282305	3.40684e-05	6.83992	1.20679	1304.97	1456.76
N915 - 5	0.282283	2.81447e-05	0.000373664	1063	0.282275	2.81447e-05	5.78531	0.997066	1346.58	1523.07
N915 - 6	0.282292	4.08925e-05	0.000305008	1063	0.282286	4.08925e-05	6.16854	1.44862	1331.22	1498.98
N915 - 7	0.282284	2.99978e-05	0.000300587	1063	0.282278	2.99978e-05	5.89007	1.0627	1341.98	1516.49
N915 - 8	0.282257	2.55348e-05	0.000291029	1063	0.282251	2.55348e-05	4.90963	0.904686	1379.85	1578.06
N915 - 9	0.282334	2.51981e-05	0.000124542	1063	0.282331	2.51981e-05	7.76154	0.892501	1268.51	1398.75
N915 - 10	0.282328	3.11454e-05	0.000309023	1063	0.282322	3.11454e-05	7.43541	1.10319	1282.15	1419.29
N915 - 11	0.282284	2.18097e-05	0.000308695	1063	0.282278	2.18097e-05	5.8705	0.772633	1342.79	1517.72
N915 - 12	0.282357	4.23761e-05	0.00041038	1063	0.282349	4.23761e-05	8.39246	1.50084	1245.52	1359
N915 - 13	0.282296	3.70395e-05	0.000452479	1063	0.282287	3.70395e-05	6.19118	1.31212	1331.38	1497.56
N915 - 14	0.282278	2.40828e-05	0.000177947	1063	0.282274	2.40828e-05	5.73985	0.853171	1346.88	1525.93
N915 - 15	0.282335	5.06347e-05	0.000360395	1063	0.282328	5.06347e-05	7.64846	1.79347	1274.18	1405.87
N915 - 16	0.282332	3.49235e-05	0.000154525	1063	0.282329	3.49235e-05	7.67262	1.23698	1272.11	1404.35
N915 - 17	0.282315	6.61721e-05	0.000306351	1063	0.282309	6.61721e-05	6.95872	2.34396	1300.62	1449.29
N915 - 18	0.282258	3.14471e-05	0.000296843	1063	0.282252	3.14471e-05	4.96194	1.11415	1377.87	1574.78
N915 - 19	0.282268	2.63526e-05	0.000323809	1063	0.282261	2.63526e-05	5.28831	0.933624	1365.46	1554.29
N915 - 20	0.282277	2.69714e-05	0.000318068	1063	0.282271	2.69714e-05	5.61254	0.955516	1352.86	1533.92
N915 - 21	0.282289	3.65764e-05	0.000325054	1063	0.282282	3.65764e-05	6.03451	1.29574	1336.56	1507.41
N915 - 22	0.282297	3.14918e-05	0.000302078	1063	0.282291	3.14918e-05	6.33896	1.11558	1324.6	1488.27
N915 - 23	0.282308	2.93649e-05	0.000293549	1063	0.282303	2.93649e-05	6.74434	1.04019	1308.84	1462.78
N915 - 24	0.282284	2.48843e-05	0.000356915	1063	0.282276	2.48843e-05	5.8193	0.881558	1345.13	1520.93
N915 - 25	0.282282	2.5972e-05	0.000373956	1063	0.282274	2.5972e-05	5.7419	0.920099	1348.26	1525.8
N915 - 26	0.282273	2.81831e-05	0.000118847	1063	0.282271	2.81831e-05	5.63016	0.998441	1350.67	1532.82
N915 - 27	0.282312	2.62314e-05	0.000221297	1063	0.282308	2.62314e-05	6.93242	0.929176	1301.11	1450.94
N915 - 28	0.282296	2.26316e-05	0.000284916	1063	0.28229	2.26316e-05	6.31579	0.801714	1325.38	1489.73
N915 - 29	0.282254	4.656e-05	0.000349582	1063	0.282247	4.656e-05	4.78274	1.64962	1385.25	1586.03
N915 - 30	0.282321	2.64304e-05	0.000393636	1063	0.282313	2.64304e-05	7.11343	0.93621	1295.15	1439.55
Group Stats	0.282297	9.30144e-06	0.000299665	1063	0.282291	9.30144e-06	6.32022	0.329499	1325.31	1489.45

## Sheet: Summary
Sample	Initial 176Hf/177Hf	95% conf	MSWD	PoF	n	εHf(t)	0.95	Ref Value	Reference
T2U	0.282682	7.38017e-06	2.28298	0.000160126	28	5.64348	0.261231	5.8	Woodhead et al. 2005
T2C	0.282686	7.72547e-06	2.67133	2.70171e-06	30	5.78188	0.273449	5.8	Woodhead et al. 2005
91U	0.282287	8.49778e-06	2.31692	9.36905e-05	29	6.19493	0.301229	6.9	Woodhead et al. 2005
91C	0.282298	9.17541e-06	2.08474	0.000791224	29	6.57352	0.325267	6.9	Woodhead et al. 2005
QNU	0.281587	4.27164e-06	1.37595	0.0855405	30	-0.623242	0.151699	-0.7	Woodhead et al. 2005
QNC	0.281581	4.1729e-06	0.932354	0.569641	30	-0.822307	0.148195	-0.7	Woodhead et al. 2005
OGU	0.280555	4.55557e-06	1.32417	0.11718	29	0.522807	0.162377	0.6	Kemp et al. 2017
OGC	0.280562	6.75593e-06	2.20713	0.000238678	29	0.753276	0.24082	0.6	Kemp et al. 2017
