# Supplementary material for: Effect of chemical abrasion of zircon on SIMS U–Pb, δ 18 O, trace element, and LA-ICPMS trace element and Lu–Hf isotopic analyses
Source: Copernicus journal article supplement (doi:10.5194/gchron-6-337-2024), 2024-07-10
Supplement: Supplementary file 5 [file Table S2-master-spot-list-GA6363.xlsx]

## Sheet: spot comparison
LASS Spot	SHRIMP2 Spot U-Pb	SHRIMP SI d18O	SHRIMP SI OH-F	SHRIMP2 TE
	915-C-1.1
	915-C-10.1	91C.10.1		91C.10.1
C915 - 8	915-C-11.1	91C.11.1		91C.11.1
C915 - 10	915-C-12.1	91C.12.1		91C.12.1
C915 - 7	915-C-13.1	91C.13.1		91C.13.1
C915 - 9	915-C-14.1	91C.14.1		91C.14.1
C915 - 11	915-C-15.1	91C.15.1		91C.15.1
	915-C-16.1	91C.16.1
C915 - 12	915-C-17.1	91C.17.1		91C.17.1
	915-C-18.1	91C.18.1
C915 - 13	915-C-19.1	91C.19.1
	915-C-2.1	91C.2.1
	915-C-20.1	91C.20.1
C915 - 15	915-C-21.1	91C.21.1
C915 - 16	915-C-22.1	91C.22.1
C915 - 14	915-C-23.1	91C.23.1
	915-C-24.1	91C.24.1
C915 - 17	915-C-25.1	91C.25.1
C915 - 20	915-C-26.1	91C.26.1
	915-C-27.1	91C.27.1
C915 - 22	915-C-28.1	91C.28.1
C915 - 23	915-C-29.1	91C.29.1
	915-C-3.1
C915 - 24	915-C-30.1	91C.30.1
C915 - 25	915-C-31.1	91C.31.1
C915 - 29	915-C-32.1	91C.32.1
C915 - 26	915-C-33.1	91C.33.1
C915 - 27	915-C-34.1	91C.34.1
	915-C-35.1	91C.35.1
C915 - 28	915-C-36.1
	915-C-37.1
C915 - 30	915-C-38.1
	915-C-39.1
C915 - 1	915-C-4.1	91C.4.1
C915 - 21	915-C-40.1
C915 - 19	915-C-41.1
C915 - 18	915-C-42.1
C915 - 2	915-C-5.1	91C.5.1		91C.5.1
	915-C-6.1	91C.6.1		91C.6.1
	915-C-7.1	91C.7.1		91C.7.1
C915 - 4	915-C-8.1	91C.8.1
C915 - 6	915-C-9.1			91C.9.1
N915 - 3	915-N-1.1	91U.1.1
N915 - 9	915-N-10.1
N915 - 5	915-N-11.1	91U.11.1
N915 - 18	915-N-12.2
N915 - 21	915-N-13.1	91U.13.1
N915 - 19	915-N-14.1	91U.14.1
N915 - 20	915-N-14.2
N915 - 22	915-N-15.1
N915 - 23	915-N-16.1	91U.16.1
N915 - 27	915-N-17.1	91U.17.1
N915 - 28	915-N-18.1	91U.18.1
	915-N-19.1	91U.19.1
N915 - 1	915-N-2.1	91U.2.1
N915 - 2	915-N-2.2
N915 - 29	915-N-20.1	91U.20.1
	915-N-21.1	91U.21.1
N915 - 30	915-N-22.1	91U.22.1
N915 - 26	915-N-23.1	91U.23.1
N915 - 25	915-N-24.1	91U.24.1
N915 - 24	915-N-24.2
N915 - 17	915-N-27.1
N915 - 13	915-N-28.1
N915 - 16	915-N-29.2
N915 - 4	915-N-3.1	91U.3.1
N915 - 7	915-N-30.1
N915 - 6	915-N-4.1	91U.4.1
N915 - 8	915-N-5.1	91U.5.1
N915 - 11	915-N-6.1	91U.6.1
N915 - 10	915-N-6.2
N915 - 15	915-N-7.1	91U.7.1
N915 - 14	915-N-8.1
N915 - 12	915-N-9.1	91U.9.1
	MPU.86.1			MPU.86.1
C915 - 3	not analysed
C915 - 5	not analysed
COG1 - 5	not analysed
CQGN - 25	not analysed
CTEM - 30	not analysed
NOG1 - 23	not analysed
NOG1 - 24	not analysed
NOG1 - 26	not analysed
NOG1 - 29	not analysed
NTEM - 29	Not analysed
COG1 - 2	OG1-C-1.1	OGC.1.1		OGC.1.1
COG1 - 13	OG1-C-10.1	OGC.10.1		OGC.10.1
COG1 - 12	OG1-C-11.1	OGC.11.1
COG1 - 10	OG1-C-12.1	OGC.12.1		OGC.12.1
COG1 - 14	OG1-C-13.1	OGC.13.1		OGC.13.1
	OG1-C-14.1	OGC.14.1
	OG1-C-15.1	OGC.15.1
COG1 - 15	OG1-C-16.1	OGC.16.1
COG1 - 16	OG1-C-17.1	OGC.17.1
COG1 - 20	OG1-C-18.1	OGC.18.1
COG1 - 19	OG1-C-19.1	OGC.19.1
COG1 - 1	OG1-C-2.1	OGC.2.1		OGC.2.1
COG1 - 17	OG1-C-20.1	OGC.20.1
COG1 - 18	OG1-C-21.1		OGC.21.1
COG1 - 28	OG1-C-22.1		OGC.22.1
	OG1-C-23.1		OGC.23.1
COG1 - 21	OG1-C-24.1		OGC.24.1
COG1 - 22	OG1-C-25.1		OGC.25.1
COG1 - 23	OG1-C-26.1		OGC.26.1
COG1 - 25	OG1-C-27.1		OGC.27.1
COG1 - 24	OG1-C-28.1		OGC.28.1
COG1 - 26	OG1-C-29.1		OGC.29.1
COG1 - 4	OG1-C-3.1	OGC.3.1		OGC.3.1
COG1 - 27	OG1-C-30.1		OGC.30.1
	OG1-C-31.1		OGC.31.1
COG1 - 29	OG1-C-32.1		OGC.32.1
COG1 - 30	OG1-C-33.1
	OG1-C-34.1
	OG1-C-35.1
	OG1-C-36.1
	OG1-C-37.1
	OG1-C-38.1
	OG1-C-39.1
COG1 - 3	OG1-C-4.1	OGC.4.1		OGC.4.1
	OG1-C-40.1
	OG1-C-41.1
	OG1-C-42.1
COG1 - 6	OG1-C-5.1	OGC.5.1		OGC.5.1
COG1 - 7	OG1-C-6.1	OGC.6.1		OGC.6.1
COG1 - 8	OG1-C-7.1	OGC.7.1		OGC.7.1
COG1 - 9	OG1-C-8.1	OGC.8.1		OGC.8.1
COG1 - 11	OG1-C-9.1	OGC.9.1		OGC.9.1
NOG1 - 3	OG1-N-1.1	OGU.1.1		OGU.1.1
	OG1-N-10.1	OGU.10.1		OGU.10.1
NOG1 - 15	OG1-N-11.1	OGU.11.1		OGU.11.1
NOG1 - 25	OG1-N-12.1	OGU.12.1		OGU.12.1
NOG1 - 17	OG1-N-13.1	OGU.13.1
NOG1 - 18	OG1-N-14.1	OGU.14.1
NOG1 - 16	OG1-N-15.1	OGU.15.1
NOG1 - 27	OG1-N-16.1	OGU.16.1
	OG1-N-17.1	OGU.17.1
NOG1 - 14	OG1-N-18.1	OGU-18.1
NOG1 - 13	OG1-N-19.1	OGU.19.1
NOG1 - 1	OG1-N-2.1	OGU.2.1		OGU.2.1
	OG1-N-20.1	OGU.20.1
NOG1 - 12	OG1-N-21.1	OGU.21.1
NOG1 - 10	OG1-N-22.1	OGU.22.1
	OG1-N-23.1		OGU.23.1
NOG1 - 6	OG1-N-24.1		OGU.24.1
NOG1 - 30	OG1-N-25.1		OGU.25.1
	OG1-N-26.1		OGU.26.1
NOG1 - 4	OG1-N-27.1		OGU.27.1
NOG1 - 2	OG1-N-28.1		OGU.28.1
	OG1-N-29.1		OGU.29.1
NOG1 - 5	OG1-N-3.1	OGU.3.1		OGU.3.1
NOG1 - 8	OG1-N-30.1		OGU.30.1
	OG1-N-31.1
NOG1 - 28	OG1-N-32.1		OGU.31.1
	OG1-N-33.1
	OG1-N-34.1
	OG1-N-35.1	OGU.35.1
	OG1-N-36.1	OGU.36.1
	OG1-N-37.1
NOG1 - 21	OG1-N-38.1		OGU.32.1
NOG1 - 20	OG1-N-39.1
NOG1 - 7	OG1-N-4.1	OGU.4.1		OGU.4.1
NOG1 - 22	OG1-N-40.1	OGU.40.1
NOG1 - 19	OG1-N-41.1
	OG1-N-42.1
NOG1 - 9	OG1-N-5.1	OGU.5.1		OGU.5.1
NOG1 - 11	OG1-N-6.1	OGU.6.1		OGU.6.1
	OG1-N-7.1	OGU.7.1		OGU.7.1
	OG1-N-8.1	OGU.8.1		OGU.8.1
	OG1-N-9.1	OGU.9.1		OGU.9.1
CQGN - 2	QGN-C-1.1	QGC.1.1		QGC.1.1
CQGN - 13	QGN-C-10.1	QGC.10.1		QGC.10.1
CQGN - 14	QGN-C-11.1	QGC.11.1		QGC.11.1
CQGN - 16	QGN-C-12.1	QGC.12.1		QGC.12.1
CQGN - 19	QGN-C-13.1	QGC.13.1
CQGN - 17	QGN-C-14.1	QGC.14.1
CQGN - 18	QGN-C-15.1	QGC.15.1
	QGN-C-16.1	QGC.16.1
CQGN - 15	QGN-C-17.1	QGC.17.1
CQGN - 9	QGN-C-18.1	QGC.18.1
CQGN - 7	QGN-C-19.1	QGC.19.1
CQGN - 1	QGN-C-2.1	QGC.2.1		QGC.2.1
CQGN - 3	QGN-C-20.1	QGC.20.1
	QGN-C-21.1		QGC.21.1
CQGN - 4	QGN-C-22.1		QGC.22.1
	QGN-C-23.1		QGC.23.1
	QGN-C-24.1		QGC.24.1
	QGN-C-25.1		QGC.25.1
	QGN-C-26.1
CQGN - 21	QGN-C-27.1		QGC.27.1
CQGN - 20	QGN-C-28.1		QGC.28.1
	QGN-C-29.1		QGC.29.1
CQGN - 5	QGN-C-3.1	QGC.3.1		QGC.3.1
CQGN - 22	QGN-C-30.1		QGC.30.1
CQGN - 23	QGN-C-31.1		QGC.31.1
	QGN-C-32.1		QGC.32.1
CQGN - 24	QGN-C-33.1
	QGN-C-34.1
CQGN - 26	QGN-C-35.1
CQGN - 27	QGN-C-36.1
	QGN-C-37.1
CQGN - 29	QGN-C-38.1
CQGN - 28	QGN-C-39.1
CQGN - 6	QGN-C-4.1	QGC.4.1		QGC.4.1
CQGN - 30	QGN-C-41.1
	QGN-C-42.1
CQGN - 10	QGN-C-5.1	QGC.5.1		QGC.5.1
CQGN - 8	QGN-C-6.1	QGC.6.1		QGC.6.1
CQGN - 12	QGN-C-7.1	QGC.7.1		QGC.7.1
CQGN - 11	QGN-C-8.1	QGC.8.1		QGC.8.1
	QGN-C-9.1	QGC.9.1		QGC.9.1
NQGN - 2	QGN-N-1.1	QGU.1.1		QGU.1.1
	QGN-N-1.2			QGU.1.2
NQGN - 4	QGN-N-10.1	QGU.10.1		QGU.10.1
NQGN - 7	QGN-N-11.1	QGU.11.1
	QGN-N-12.1	QGU.12.1
NQGN - 17	QGN-N-13.1	QGU.13.1
NQGN - 22	QGN-N-14.1	QGU.14.1
NQGN - 23	QGN-N-15.1	QGU.15.1
	QGN-N-16.1	QGU.16.1
	QGN-N-17.1	QGU.17.1
NQGN - 25	QGN-N-18.1	QGU.18.1
NQGN - 28	QGN-N-19.1	QGU.19.1
NQGN - 8	QGN-N-2.1	QGU.2.1		QGU.2.1
	QGN-N-2.2			QGU.2.2
NQGN - 27	QGN-N-20.1	QGU.20.1
	QGN-N-21.1
NQGN - 26	QGN-N-22.1	QGU.22.1
NQGN - 24	QGN-N-23.1		QGU.23.1
	QGN-N-24.1		QGU.24.1
NQGN - 20	QGN-N-25.1		QGU.25.1
NQGN - 19	QGN-N-26.1		QGU.26.1
	QGN-N-27.1	QGU.27.1
NQGN - 16	QGN-N-28.1
NQGN - 5	QGN-N-29.1		QGU.29.1
NQGN - 9	QGN-N-3.1	QGU.3.1		QGU.3.1
NQGN - 6	QGN-N-30.1		QGU.30.1
NQGN - 1	QGN-N-31.1		QGU.31.1
	QGN-N-32.1		QGU.32.1
NQGN - 13	QGN-N-33.1	QGU.33.1
NQGN - 29	QGN-N-34.1		QGU.34.1
NQGN - 30	QGN-N-35.1		QGU.35.1
	QGN-N-36.1		QGU.36.1
	QGN-N-37.1
NQGN - 14	QGN-N-38.1
	QGN-N-39.1
NQGN - 10	QGN-N-4.1	QGU.4.1		QGU.4.1
NQGN - 21	QGN-N-40.1
	QGN-N-41.1
	QGN-N-42.1
NQGN - 12	QGN-N-5.1	QGU.5.1		QGU.5.1
NQGN - 15	QGN-N-6.1	QGU.6.1		QGU.6.1
NQGN - 11	QGN-N-7.1	QGU.7.1		QGU.7.1
NQGN - 18	QGN-N-8.1	QGU.8.1	QGU.8.1	QGU.8.1
NQGN - 3	QGN-N-9.1	QGU.9.1		QGU.9.1
CTEM - 1	Tem-C-1.1	T2C.1.1		T2C-1.1
CTEM - 13	Tem-C-10.1	T2C.10.1		T2C-10.1
CTEM - 12	Tem-C-11.1	T2C.11.1		T2C-11.1
CTEM - 14	Tem-C-12.1	T2C.12.1
CTEM - 16	Tem-C-13.1	T2C.13.1
CTEM - 15	Tem-C-14.1	T2C.14.1
CTEM - 17	Tem-C-15.1	T2C.15.1
	Tem-C-16.1	T2C.16.1
CTEM - 11	Tem-C-17.1	T2C.17.1
CTEM - 20	Tem-C-18.1	T2C.18.1
	Tem-C-19.1	T2C.19.1
CTEM - 2	Tem-C-2.1	T2C.2.1
	Tem-C-20.1	T2C.20.1
CTEM - 18	Tem-C-21.1		T2C.21.1
CTEM - 22	Tem-C-22.1		T2C.22.1
CTEM - 21	Tem-C-23.1		T2C.23.1
CTEM - 23	Tem-C-24.1		T2C.24.1
CTEM - 24	Tem-C-25.1		T2C.25.1
CTEM - 25	Tem-C-26.1		T2C.26.1
CTEM - 26	Tem-C-27.1		T2C.27.1
CTEM - 29	Tem-C-28.1		T2C.28.1
CTEM - 28	Tem-C-29.1		T2C.29.1
CTEM - 4	Tem-C-3.1	T2C.3.1
CTEM - 27	Tem-C-30.1		T2C.30.1
	Tem-C-31.1		T2C.31.1
	Tem-C-32.1
CTEM - 3	Tem-C-33.1		T2C.33.1
CTEM - 9	Tem-C-34.1
CTEM - 8	Tem-C-35.1
	Tem-C-36.1
	Tem-C-37.1
	Tem-C-38.1
	Tem-C-39.1
	Tem-C-4.1	T2C.4.1		T2C-4.1
CTEM - 7	Tem-C-40.1
CTEM - 19	Tem-C-41.1
CTEM - 10	Tem-C-5.1	T2C.5.1
CTEM - 6	Tem-C-6.1	T2C.6.1
CTEM - 5	Tem-C-7.1	T2C.7.1
	Tem-C-8.1	T2C.8.1		T2C-8.1
	Tem-C-9.1	T2C.9.1		T2C-9.1
	Tem-N-1.1	T2U.1.1		T2U-1.1
NTEM - 5	Tem-N-10.1	T2U.10.1		T2U-10.1
	Tem-N-11.1			T2U-11.1
NTEM - 8	Tem-N-12.1	T2U.12.1		T2U-12.1
	Tem-N-13.1	T2U.13.1		T2U-13.1
NTEM - 13	Tem-N-14.1	T2U.14.1
NTEM - 12	Tem-N-15.1	T2U.15.1
NTEM - 11	Tem-N-16.1	T2U.16.1
NTEM - 10	Tem-N-17.1	T2U.17.1
	Tem-N-18.1
	Tem-N-19.1	T2U.19.1
	Tem-N-2.1			T2U-2.1
NTEM - 17	Tem-N-20.1	T2U.20.1
NTEM - 16	Tem-N-21.1	T2U.21.1
NTEM - 15	Tem-N-22.1	T2U.22.1
NTEM - 19	Tem-N-23.1	T2U.23.1
NTEM - 18	Tem-N-24.1	T2U.24.1
NTEM - 30	Tem-N-25.1
NTEM - 28	Tem-N-26.1	T2U.26.1
NTEM - 20	Tem-N-27.1	T2U.27.1
NTEM - 21	Tem-N-28.1	T2U.28.1
NTEM - 26	Tem-N-29.1		T2U.29.1
NTEM - 7	Tem-N-3.1	T2U.3.1
NTEM - 27	Tem-N-30.1		T2U.30.1
NTEM - 23	Tem-N-31.1		T2U.31.1
NTEM - 24	Tem-N-32.1		T2U.32.1
NTEM - 25	Tem-N-33.1		T2U.33.1
NTEM - 22	Tem-N-34.1		T2U.34.1
NTEM - 14	Tem-N-35.1		T2U.35.1
	Tem-N-36.1
NTEM - 9	Tem-N-37.1		T2U.37.1
NTEM - 6	Tem-N-38.1		T2U.38.1
NTEM - 1	Tem-N-39.1		T2U.39.1
	Tem-N-4.1			T2U-4.1
NTEM - 2	Tem-N-40.1		T2U.40.1
	Tem-N-41.1		T2U.41.1
	Tem-N-42.1
	Tem-N-5.1			T2U-5.1
	Tem-N-6.1			T2U-6.1
	Tem-N-7.1			T2U-7.1
NTEM - 3	Tem-N-8.1	T2U.8.1
NTEM - 4	Tem-N-9.1	T2U.9.1
