# Supplementary material for: Effect of chemical abrasion of zircon on SIMS U–Pb, δ 18 O, trace element, and LA-ICPMS trace element and Lu–Hf isotopic analyses
Source: Copernicus journal article supplement (doi:10.5194/gchron-6-337-2024), 2024-07-10
Supplement: Supplementary file 6 [file Table S3-SH2-U-Pb-GA6363-T2Uref.xls]

## Sheet: Table OGC
Spot Name	4-corr %com 206Pb	ppm U	ppm Th	232Th/ 238U	4corr 238U /206Pb*	% err	204Pb corr 207Pb* /206Pb*	% err	204Pb corr 206Pb /238U Age, Ma	1σ err, Ma	% Dis- cor- dant
OGC.1.1	0.0236258	186.748	127.625	0.705959	1.41316	1.21144	0.299185	0.264758	3449.54	32.3621	0.613467
OGC.2.1	0.0089079	116.55	61.829	0.548002	1.40906	0.66917	0.300094	0.344399	3457.31	17.9064	0.498744
OGC.3.1	0.0266117	192.567	150.053	0.80494	1.4209	0.5191	0.29824	0.266488	3434.97	13.8227	0.973824
OGC.4.1	0.0255737	69.1984	42.0179	0.627247	1.39716	1.27452	0.301507	0.412545	3480.05	34.2742	-0.0769496
OGC.5.1	0.00801526	119.855	70.5393	0.607962	1.41644	0.629755	0.300795	0.324691	3443.34	16.8002	1.15064
OGC.6.1	0.0184373	179.211	109.467	0.630988	1.39851	0.908628	0.299628	0.266074	3477.46	24.421	-0.341701
OGC.7.1	0.0145885	132.519	79.5278	0.619926	1.4186	0.606822	0.299127	0.311132	3439.27	16.1739	0.984015
OGC.8.1	0.0094067	164.424	159.072	0.999375	1.43701	0.928178	0.299562	0.28824	3405.04	24.5523	2.33442
OGC.9.1	0.00552945	92.5959	60.0713	0.670155	1.41863	0.742804	0.298083	0.381505	3439.23	19.7981	0.785337
OGC.10.1	0.0152055	163.038	88.2032	0.558849	1.41615	0.988387	0.300061	0.284007	3443.89	26.3707	0.990945
OGC.11.1	-0.0226349	176.367	116.418	0.681874	1.40068	1.03215	0.301313	0.27367	3473.29	27.7156	0.137738
OGC.12.1	0.0155709	94.9547	52.5657	0.571856	1.40031	0.723653	0.299843	0.370331	3474	19.4349	-0.171151
OGC.13.1	0.0125056	127.892	71.8498	0.580341	1.41384	0.648688	0.299634	0.333566	3448.24	17.3239	0.747708
OGC.14.1	0.0461964	114.909	63.401	0.569957	1.40889	0.677758	0.300824	0.554018	3457.62	18.1374	0.626634
OGC.15.1	0.0225679	179.047	159.498	0.920212	1.39054	0.540867	0.298844	0.274647	3492.84	14.5852	-1.06959
OGC.16.1	-0.0351366	101.894	57.6678	0.584636	1.41701	1.0947	0.299856	0.341839	3442.27	29.1968	1.01201
OGC.17.1	0.0290241	143.417	111.962	0.806434	1.42766	1.11274	0.299432	0.308691	3422.34	29.5477	1.67029
OGC.18.1	-0.0165581	160.866	92.0879	0.59134	1.4139	0.575423	0.298861	0.296312	3448.13	15.3669	0.603692
OGC.19.1	-0.00340985	146.821	83.919	0.590436	1.40882	0.588289	0.299298	0.300268	3457.75	15.7436	0.329457
OGC.20.1	0.0261364	205.462	146.235	0.735225	1.41114	1.10751	0.298061	0.575934	3453.35	29.6104	0.254617
OGC.21.1	2.96305e-18	80.7035	63.3418	0.810771	1.41341	1.53336	0.299833	0.395907	3449.05	40.9573	0.75569
OGC.22.1	-0.0200144	148.186	82.5494	0.575448	1.40893	1.05926	0.299695	0.296665	3457.55	28.3464	0.413186
OGC.23.1	-0.0152427	202.168	106.763	0.545519	1.39875	0.508067	0.300031	0.260067	3476.99	13.6538	-0.246392
OGC.24.1	0.0486106	84.2629	54.2021	0.664477	1.42612	0.778415	0.299526	0.401761	3425.21	20.6832	1.58194
OGC.25.1	0.00991028	139.928	83.9993	0.620112	1.4066	0.577711	0.299093	0.296004	3461.99	15.4748	0.132092
OGC.26.1	-0.0312079	121.752	119.174	1.01112	1.40401	0.628811	0.299382	0.323655	3466.93	16.8618	0.00374382
OGC.27.1	0.00588796	80.5506	47.5961	0.610384	1.40981	0.7679	0.297272	0.395071	3455.87	20.5418	0.00741485
OGC.28.1	-0.0395673	118.424	66.1207	0.576766	1.41443	0.663244	0.302456	0.34107	3447.14	17.7083	1.32327
OGC.29.1	-6.33501e-12	203.055	106.762	0.54313	1.4188	0.507003	0.301161	0.258691	3438.91	13.5123	1.38396
OGC.30.1	-0.0363218	100.7	59.5518	0.610894	1.39062	0.728982	0.298615	0.374519	3492.68	19.6573	-1.10842
OGC.31.1	0.00777257	205.22	197.66	0.994947	1.40898	0.512426	0.299521	0.26202	3457.44	13.7125	0.383959
OGC.32.1	-0.00983612	115.463	63.4229	0.567421	1.43571	1.16289	0.299298	0.569738	3407.44	30.7772	2.19617
OGC.33.1	-0.0477111	119.088	68.2599	0.592103	1.40201	0.663422	0.297985	0.341714	3470.74	17.8047	-0.409838
OGC.34.1	1.41231e-11	186.304	144.518	0.801308	1.4004	0.534531	0.300108	0.273304	3473.83	14.3552	-0.113822
OGC.35.1	-0.00651952	159.326	163.141	1.05774	1.40659	0.917317	0.3004	0.461992	3461.99	24.5717	0.383334
OGC.36.1	-0.0120728	181.737	116.187	0.660414	1.40282	0.54735	0.299961	0.283008	3469.2	14.6846	0.030694
OGC.37.1	-0.00626927	84.8833	53.7144	0.653685	1.41362	0.793342	0.298553	0.406759	3448.66	21.1889	0.524717
OGC.38.1	2.11047e-11	123.466	63.8742	0.534416	1.39013	0.658966	0.29861	0.536403	3493.63	17.7729	-1.14489
OGC.39.1	-0.0060475	173.309	105.347	0.627918	1.41035	1.03318	0.300004	0.284689	3454.86	27.6323	0.572601
OGC.40.1	-0.00485938	111.463	64.2674	0.595606	1.39133	0.703769	0.298535	0.36001	3491.31	18.9718	-1.07268
OGC.41.1	0.0135978	112.564	97.4005	0.893842	1.38555	0.685956	0.299657	0.34682	3502.55	18.5364	-1.2745
OGC.42.1	8.66095e-12	144.01	126.602	0.908127	1.39159	0.947995	0.299332	0.30318	3490.8	25.5527	-0.897832

## Sheet: Table OGU
Spot Name	4-corr %com 206Pb	ppm U	ppm Th	232Th/ 238U	4corr 238U /206Pb*	% err	204Pb corr 207Pb* /206Pb*	% err	204Pb corr 206Pb /238U Age, Ma	1σ err, Ma	% Dis- cor- dant
OGU.1.1	5.02492e-11	131.112	131.934	1.03948	1.43296	0.628767	0.298337	0.324554	3412.51	16.6599	1.82632
OGU.3.1	1.64487e-11	156.085	157.933	1.04523	1.4203	0.575566	0.298561	0.295211	3436.08	15.33	0.994142
OGU.4.1	0.0327203	92.481	76.4672	0.854128	1.40133	0.689722	0.301036	0.352246	3472.05	18.5157	0.130833
OGU.5.1	0.0251566	203.522	173.833	0.88231	1.39888	0.484723	0.299008	0.248067	3476.74	13.0257	-0.434914
OGU.6.1	-0.0131756	113.773	106.644	0.968273	1.42819	0.659263	0.300107	0.341001	3421.37	17.5023	1.83405
OGU.7.1	-0.0234519	146.475	129.923	0.916263	1.41362	1.16427	0.299193	0.300152	3448.66	31.096	0.647856
OGU.8.1	0.0571271	163.686	160.389	1.01219	1.41538	0.547019	0.300371	0.284704	3445.34	14.5994	0.996166
OGU.10.1	0.00420103	118.762	102.958	0.895539	1.40711	0.648861	0.299075	0.332078	3461.01	17.377	0.165222
OGU.13.1	0.0120165	169.154	151.367	0.924379	1.42094	0.551012	0.29959	0.281564	3434.89	14.6722	1.23518
OGU.14.1	-0.00252681	207.492	148.194	0.737781	1.43692	1.01301	0.299176	0.257699	3405.2	26.7971	2.25553
OGU.15.1	0.0138779	188.999	176.796	0.966301	1.40869	0.530022	0.298476	0.27301	3457.99	14.185	0.161934
OGU.16.1	0.0172978	187.045	199.147	1.09984	1.39436	0.735557	0.299046	0.421327	3485.44	19.8036	-0.752998
OGU.17.1	-0.00399537	126.19	112.987	0.924914	1.4225	0.631684	0.301316	0.324383	3431.97	16.8095	1.66981
OGU.18.1	0.0272445	191.031	141.955	0.767626	1.4061	0.527641	0.297507	0.271651	3462.93	14.1365	-0.210832
OGU.19.1	0.0139532	171.062	109.869	0.663474	1.40582	1.07961	0.299191	0.273415	3463.47	28.9284	0.0956827
OGU.20.1	-7.44636e-12	181.607	106.299	0.604642	1.39871	0.552002	0.298141	0.281388	3477.06	14.8348	-0.615783
OGU.21.1	0.0257155	167.31	90.3639	0.557923	1.40021	0.536278	0.298552	0.276946	3474.2	14.4032	-0.428607
OGU.22.1	0.00405361	130.553	117.626	0.930718	1.42706	0.631507	0.299291	0.327207	3423.45	16.7732	1.60233
OGU.24.1	-0.013144	156.957	84.919	0.558889	1.4171	0.575008	0.298403	0.295071	3442.11	15.3355	0.73977
OGU.25.1	0.0304554	157.989	117.098	0.765636	1.41145	1.15312	0.298976	0.279387	3452.76	30.8259	0.453291
OGU.26.1	0.0635748	117.551	98.5945	0.866417	1.41878	0.628573	0.298946	0.326622	3438.94	16.7524	0.961823
OGU.27.1	-0.00496451	194.963	174.996	0.927209	1.409	1.01153	0.300521	0.399513	3457.41	27.0683	0.576721
OGU.28.1	-0.022619	160.117	165.928	1.07049	1.42456	0.570454	0.299998	0.292372	3428.13	15.1672	1.56315
OGU.29.1	0.0148535	169.338	166.396	1.01505	1.41043	0.98749	0.299738	0.281524	3454.71	26.4093	0.5273
OGU.30.1	-0.00270735	192.852	200.818	1.07567	1.41392	1.05888	0.300043	0.43471	3448.1	28.2777	0.831117
OGU.31.1	-0.00591195	89.4134	62.582	0.723015	1.41806	0.770741	0.300846	0.394964	3440.29	20.5475	1.27329
OGU.32.1	0.0439624	225.497	237.989	1.09022	1.42944	0.483061	0.297459	0.249776	3419.03	12.8178	1.41633
OGU.33.1	-0.00414585	127.286	107.877	0.875485	1.40327	0.648681	0.300556	0.331113	3468.34	17.3999	0.177051
OGU.34.1	-0.0172253	125.106	116.788	0.964323	1.41155	1.15236	0.297769	0.33743	3452.58	30.8043	0.226964
OGU.36.1	0.129073	212.072	239.827	1.16819	1.40762	1.2816	0.299725	0.270138	3460.03	34.3149	0.326757
OGU.37.1	0.0752151	234.044	192.932	0.851542	1.42671	0.482542	0.298533	0.255633	3424.11	12.8184	1.43345
OGU.38.1	-0.0033528	157.951	87.4806	0.572125	1.41944	0.584445	0.298829	0.297787	3437.71	15.5721	0.985025
OGU.39.1	0.0127845	170.893	92.7952	0.560921	1.41612	0.561569	0.299624	0.476117	3443.94	14.9831	0.905623
OGU.41.1	0.0145303	187.614	97.5152	0.536918	1.41909	0.540866	0.299417	0.277976	3438.37	14.4131	1.07311
Discordant and other outliers
OGU.2.1	0.0164436	149.681	186.366	1.28618	1.44268	0.57517	0.299932	0.293171	3394.64	15.1792	2.78751
OGU.9.1	0.0256711	127.28	114.343	0.928002	1.37898	0.624894	0.296796	0.313724	3515.4	16.933	-2.32318
OGU.11.1	0.103779	222.183	249.362	1.15937	1.4295	0.459233	0.298656	0.276267	3418.93	12.1853	1.649
OGU.12.1	0.00587279	159.913	166.134	1.07318	1.38304	0.563796	0.30098	0.284326	3507.45	15.2514	-1.2008
OGU.23.1	-0.00808423	125.583	111.538	0.917468	1.39151	0.644336	0.29883	0.329066	3490.96	17.3683	-1.00192
OGU.35.1	0.139105	197.697	194.644	1.01705	1.48865	0.989848	0.299267	0.287284	3312.62	25.6403	5.66883
OGU.40.1	-1.19631e-11	235.907	293.615	1.28569	1.44133	0.825406	0.299725	0.257243	3397.1	21.7951	2.65784
OGU.42.1	0.0113142	271.527	335.404	1.27601	1.46466	0.447156	0.299693	0.241635	3354.9	11.6955	4.2025

## Sheet: Table QGC
Spot Name	4-corr %com 206Pb	ppm U	ppm Th	232Th/ 238U	4corr 238U /206Pb*	% err	204Pb corr 207Pb* /206Pb*	% err	204Pb corr 206Pb /238U Age, Ma	1σ err, Ma	% Dis- cor- dant
QGC.1.1	0.0290819	244.698	253.965	1.07212	2.99835	0.492884	0.112522	0.485697	1855.4	7.94661	-0.929492
QGC.2.1	5.30174e-11	279.089	152.65	0.565008	3.03226	0.468926	0.113073	0.450909	1837.35	7.49677	0.747933
QGC.3.1	0.0314738	231.831	197.389	0.879533	3.01923	1.07163	0.112667	0.506912	1844.24	17.1877	-0.0850109
QGC.4.1	0.0423704	333.822	242.621	0.75078	2.99782	0.874861	0.113064	0.399472	1855.69	14.107	-0.402047
QGC.5.1	0.0832526	125.257	112.918	0.931241	2.9739	0.663936	0.113244	0.673625	1868.65	10.7703	-1.02824
QGC.6.1	0.00756053	349.805	308.084	0.909797	3.0084	0.400749	0.113699	0.383463	1850.02	6.44495	0.577572
QGC.7.1	-0.0131091	213.801	168.32	0.813255	3.00986	0.936511	0.113528	0.785629	1849.24	15.0557	0.458422
QGC.8.1	0.0479871	258.88	247.078	0.985908	3.01259	0.471793	0.112146	0.47472	1847.78	7.57958	-0.83398
QGC.9.1	0.00731339	199.011	209.934	1.0897	3.04487	0.54794	0.11283	0.533543	1830.72	8.73266	0.918721
QGC.10.1	-0.00496849	273.843	261.076	0.98484	3.00392	0.740324	0.112974	0.439688	1852.42	11.9194	-0.287691
QGC.11.1	0.0296405	233.054	236.455	1.04807	3.00601	0.495027	0.113693	0.490229	1851.3	7.96592	0.492774
QGC.12.1	0.00738564	191.92	179.931	0.968473	3.00156	0.553173	0.113434	0.538442	1853.68	8.91147	0.090485
QGC.13.1	-0.0237399	191.172	172.719	0.933289	3.01352	0.568528	0.112901	0.563966	1847.28	9.13154	-0.0403552
QGC.14.1	0.0137388	213.907	125.429	0.605725	2.98884	0.535923	0.113432	0.837582	1860.53	8.66111	-0.336015
QGC.15.1	7.58303e-18	160.327	133.319	0.858984	3.0014	0.987792	0.113181	0.591535	1853.76	15.9137	-0.165561
QGC.16.1	0.0890623	148.76	135.784	0.942894	3.02696	1.02648	0.11203	0.633714	1840.15	16.432	-0.473583
QGC.17.1	-0.0110859	134.197	112.476	0.865799	2.98316	0.680808	0.112973	0.656398	1863.61	11.0183	-0.98688
QGC.18.1	-0.0365431	190.505	207.117	1.12307	3.00533	1.11486	0.113009	0.828131	1851.66	17.9432	-0.205503
QGC.19.1	0.018631	156.739	116.296	0.766453	3.01574	0.623277	0.111664	0.612068	1846.1	10.0054	-1.22322
QGC.20.1	0.00579981	257.067	213.969	0.859815	2.99137	0.495002	0.113898	0.472776	1859.17	7.99471	0.207306
QGC.21.1	-0.0315345	217.566	153.874	0.730591	3.00603	0.511217	0.113608	0.502944	1851.29	8.22641	0.410261
QGC.22.1	0.0197558	149.107	123.329	0.854409	3.04419	0.633712	0.111826	0.634048	1831.08	10.1013	-0.111317
QGC.23.1	-2.48581e-11	290.281	251.867	0.896298	2.97133	0.511169	0.113165	0.436144	1870.05	8.29748	-1.19506
QGC.24.1	1.10026e-10	131.267	92.9353	0.731348	3.02148	0.673493	0.113505	0.647996	1843.05	10.7961	0.819095
QGC.25.1	0.0343189	189.002	187.333	1.02388	3.01564	0.531058	0.113495	0.527009	1846.15	8.52522	0.617503
QGC.26.1	-0.0457458	169.471	138.342	0.843254	2.97549	0.565576	0.113778	0.560447	1867.78	9.17103	-0.443469
QGC.27.1	-0.0249752	265.515	259.305	1.00884	2.9846	0.460298	0.113633	0.444032	1862.83	7.44686	-0.280034
QGC.28.1	0.0368951	309.269	231.05	0.771736	2.9863	0.441779	0.112827	0.435835	1861.91	7.14419	-1.02717
QGC.29.1	-0.0356865	122.181	91.7221	0.775478	3.00074	0.702233	0.114072	0.693014	1854.12	11.3151	0.688532
QGC.30.1	-0.0299759	200.222	159.537	0.823096	3.04078	0.556409	0.113448	0.547263	1832.87	8.87659	1.39354
QGC.31.1	0.0469797	127.529	113.069	0.915867	3.01446	1.31901	0.113079	0.695969	1846.78	21.1807	0.167605
QGC.32.1	5.55222e-11	209.787	184.481	0.908395	3.05042	0.967551	0.112821	0.537228	1827.82	15.399	1.09016
QGC.33.1	0.0304894	198.563	214.832	1.11764	3.0036	0.563151	0.113695	0.555146	1852.59	9.0676	0.414968
QGC.34.1	0.00407775	376.368	205.478	0.563966	2.99893	0.95597	0.113261	0.39692	1855.09	15.4106	-0.167974
QGC.35.1	0.0165032	179.115	165.109	0.952226	2.9812	0.588988	0.113054	0.572683	1864.67	9.53697	-0.971561
QGC.36.1	0.0343051	174.2	149.814	0.888388	3.007	0.597005	0.111952	0.592814	1850.77	9.60455	-1.2201
QGC.37.1	0.0116897	256.039	254.969	1.02868	2.97843	0.544416	0.114328	0.477935	1866.18	8.82139	0.193991
QGC.38.1	-0.0542081	251.681	223.282	0.916437	3.00599	0.78033	0.115121	0.497723	1851.3	12.557	1.86262
QGC.39.1	0.0136421	329.125	340.966	1.07016	3.01396	0.435922	0.112733	0.423964	1847.05	7.0009	-0.193987
QGC.40.1	0.105523	152.798	130.552	0.882604	3.02913	0.633789	0.11144	0.663829	1839	10.1403	-1.00645
QGC.41.1	-0.023675	124.725	103.918	0.860674	2.9755	0.703931	0.113825	0.685088	1867.78	11.4145	-0.396966
QGC.42.1	-0.0119676	349.42	340.44	1.00645	2.98544	0.42485	0.114284	0.402797	1862.37	6.87191	0.385566

## Sheet: Table QGU
Spot Name	4-corr %com 206Pb	ppm U	ppm Th	232Th/ 238U	4corr 238U /206Pb*	% err	204Pb corr 207Pb* /206Pb*	% err	204Pb corr 206Pb /238U Age, Ma	1σ err, Ma	% Dis- cor- dant
QGU.1.1	6.61297e-11	160.37	91.8984	0.591952	3.02411	1.09524	0.114032	0.580053	1841.66	17.5452	1.41684
QGU.2.1	0.0251927	168.336	157.456	0.966237	3.03885	0.59206	0.112459	0.585366	1833.88	9.44987	0.352745
QGU.3.1	0.050922	169.404	147.33	0.898397	2.98335	0.596817	0.112989	0.596273	1863.5	9.65853	-0.963324
QGU.4.1	0.0281351	137.803	88.099	0.660409	2.99783	0.625849	0.113794	0.613512	1855.69	10.0917	0.320184
QGU.5.1	0.102132	92.7402	56.4095	0.628326	3.00178	0.772718	0.11189	0.81376	1853.56	12.4476	-1.45963
QGU.6.1	0.00813385	164.912	101.955	0.638641	3.00869	0.583336	0.113263	0.56214	1849.86	9.38069	0.158661
QGU.7.1	0.00732694	189.333	167.197	0.912231	3.0004	0.552309	0.112654	0.533636	1854.3	8.90014	-0.726849
QGU.8.1	0.010638	266.383	193.986	0.752252	3.00898	0.47309	0.114171	0.453253	1849.71	7.60726	1.0551
QGU.9.1	0.00722738	377.72	261.137	0.714167	3.02213	0.669019	0.113556	0.375361	1842.7	10.7226	0.890433
QGU.10.1	-0.0187716	306.739	248.233	0.835971	3.02558	0.487378	0.114465	0.430064	1840.88	7.80469	1.87912
QGU.12.1	0.0774207	203.718	113.825	0.577177	3.04511	0.538081	0.112972	0.552348	1830.6	8.57503	1.06682
QGU.13.1	0.0475446	305.656	243.953	0.824468	3.0564	0.444987	0.11323	0.445521	1824.71	7.07172	1.68505
QGU.14.1	0.00480152	629.179	425.278	0.698231	3.05224	0.728245	0.113436	0.304631	1826.88	11.5851	1.75154
QGU.15.1	-0.0499291	240.166	203.951	0.877232	3.03096	0.811344	0.113383	0.507579	1838.03	12.9752	1.01043
QGU.16.1	-0.0440317	455.383	331.124	0.751128	3.02309	0.606446	0.113223	0.348173	1842.2	9.71741	0.594957
QGU.17.1	0.0141455	310.203	246.273	0.820107	3.0267	0.440572	0.112129	0.434353	1840.28	7.05318	-0.380889
QGU.18.1	0.0224647	258.954	173.005	0.69014	2.97775	0.490247	0.113958	0.47249	1866.55	7.94502	-0.190747
QGU.19.1	-0.0157281	274.59	291.512	1.09666	3.02861	0.467495	0.11399	0.452344	1839.28	7.48066	1.52254
QGU.20.1	0.0340779	219.867	223.822	1.05158	3.04738	0.871596	0.111751	0.530482	1829.41	13.8822	-0.0826831
QGU.21.1	0.0101007	270.03	181.568	0.694587	3.02173	0.905241	0.112591	0.44591	1842.92	14.5101	-0.0793031
QGU.22.1	0.0480359	240.444	198.264	0.851783	3.00092	0.497806	0.112524	0.500885	1854.02	8.02082	-0.841004
QGU.23.1	-0.0104883	141.444	106.225	0.775784	2.99339	1.21967	0.113785	0.637961	1858.07	19.6888	0.163641
QGU.24.1	-0.0190521	153.514	109.165	0.73457	3.01322	0.977056	0.113283	0.614962	1847.44	15.6944	0.329173
QGU.25.1	-0.0167882	230.04	165.783	0.744451	3.03278	0.478611	0.113371	0.470028	1837.07	7.65061	1.05818
QGU.26.1	0.0110595	623.405	416.933	0.69087	3.04499	0.790948	0.113107	0.310746	1830.66	12.6052	1.19573
QGU.28.1	0.0261494	226.588	225.672	1.02882	3.0358	0.516469	0.112409	0.789912	1835.48	8.2496	0.202752
QGU.29.1	0.0371633	283.913	277.382	1.00924	3.03441	0.728404	0.11288	0.466709	1836.21	11.6388	0.627443
QGU.30.1	-0.0272274	217.774	235.166	1.1155	3.02488	0.533573	0.113994	0.800487	1841.25	8.54593	1.40579
QGU.31.1	-1.41804e-11	257.806	267.525	1.07194	2.99669	0.48798	0.112971	0.466377	1856.3	7.87081	-0.532518
QGU.32.1	-0.0219622	267.792	252.715	0.974839	3.03513	0.477366	0.112877	0.468747	1835.84	7.62626	0.647687
QGU.34.1	-0.0650188	114.491	66.4919	0.599924	3.04035	0.730053	0.114082	0.737286	1833.09	11.648	1.99156
QGU.35.1	-0.0124285	120.425	83.4508	0.715839	2.96211	0.718844	0.112777	0.698017	1875.1	11.6957	-1.9037
QGU.36.1	0.0355928	242.89	186.72	0.794113	3.03275	0.501693	0.112526	0.490467	1837.09	8.01963	0.219462
QGU.37.1	0.00482633	597.644	505.772	0.874204	3.01142	0.628108	0.113237	0.305259	1848.4	10.0938	0.223837
QGU.38.1	0.00594123	512.584	409.033	0.824316	3.00782	0.646388	0.113023	0.339545	1850.33	10.3969	-0.10825
QGU.39.1	-0.0241198	124.308	92.561	0.769184	2.99734	0.706757	0.113337	0.699195	1855.95	11.3977	-0.145537
QGU.40.1	-0.0177974	506.015	320.364	0.654004	3.02127	0.355223	0.114025	0.341315	1843.16	5.69451	1.31715
QGU.1.2	0.0186313	160.471	94.9272	0.611076	3.01911	0.623084	0.11225	0.609829	1844.31	9.9939	-0.510462
QGU.2.2	-0.040653	182.125	172.786	0.98003	3.01669	0.945706	0.112548	0.949594	1845.59	15.1777	-0.289612
Pb loss
QGU.11.1	0.022925	190.025	136.507	0.742069	3.08655	0.553255	0.112849	0.560043	1809.17	8.72745	2.27551
QGU.27.1	0.00431381	323.952	304.987	0.972525	3.06992	0.703139	0.110933	0.412832	1817.71	11.1371	-0.187023
QGU.33.1	-0.0382875	124.929	64.9997	0.537463	3.17031	1.09415	0.109854	0.724651	1767.36	16.9132	1.88516

## Sheet: Table 91C
Spot Name	4-corr %com 206Pb	ppm U	ppm Th	232Th/ 238U	4corr 238U /206Pb*	% err	204Pb corr 207Pb* /206Pb*	% err	204Pb corr 206Pb /238U Age, Ma	1σ err, Ma	% Dis- cor- dant
91C.1.1	0.0743428	80.2506	26.0456	0.335263	5.46569	0.95545	0.0757084	1.47957	1083.12	9.52602	0.424336
91C.2.1	0.280614	72.3913	23.7862	0.339422	5.64461	0.993193	0.0719253	1.91156	1051.44	9.63568	-7.4493
91C.3.1	-0.154833	79.3237	25.7138	0.33486	5.57032	0.872465	0.0769321	1.41986	1064.37	8.56011	5.33531
91C.4.1	0.068394	76.4408	24.717	0.334019	5.64808	1.01821	0.0739861	1.42899	1050.85	9.87319	-1.01567
91C.5.1	-0.079425	66.3168	21.1675	0.32972	5.52397	0.992573	0.0765018	1.50643	1072.6	9.80773	3.49041
91C.6.1	0.167831	80.5724	26.7924	0.343499	5.59068	0.91372	0.073244	1.57259	1060.79	8.93719	-4.25908
91C.7.1	-0.0724901	74.6537	23.9847	0.331882	5.53662	0.952695	0.0745876	1.45119	1070.34	9.39548	-1.32687
91C.8.1	0.148241	76.8263	24.5818	0.330525	5.65514	0.961358	0.0758668	1.5803	1049.63	9.31206	4.16156
91C.9.1	-0.263029	75.3934	25.0539	0.343276	5.53103	0.965162	0.0768915	1.70507	1071.33	9.52657	4.56533
91C.10.1	-0.246643	69.6704	22.6385	0.33566	5.52939	0.935434	0.077368	2.52007	1071.63	9.23547	5.66929
91C.11.1	0.223961	63.2177	19.1707	0.313256	5.60328	1.0513	0.0737756	1.89981	1058.59	10.2633	-2.43605
91C.12.1	-9.39011e-11	76.3299	24.3997	0.33021	5.61091	0.959097	0.074548	1.36052	1057.27	9.35233	-0.0951317
91C.13.1	0.222911	80.9246	26.5885	0.339401	5.552	0.956682	0.0735184	1.72886	1067.6	9.41265	-4.15021
91C.14.1	-0.17573	97.7157	33.3044	0.352077	5.58591	0.856672	0.0749318	1.43412	1061.63	8.38527	0.512958
91C.15.1	-0.376677	71.2601	23.719	0.343836	5.5298	1.02026	0.0781	1.91329	1071.55	10.0723	7.35186
91C.16.1	0.172443	76.3916	24.5555	0.33205	5.521	0.942228	0.0728803	2.35939	1073.13	9.31451	-6.71403
91C.17.1	0.0771271	76.6371	24.8171	0.334513	5.57384	0.97287	0.073599	1.53124	1063.75	9.54011	-3.50077
91C.18.1	-0.108471	79.1798	26.0797	0.340242	5.49308	1.60537	0.0762795	1.47765	1078.15	15.9384	2.39019
91C.19.1	-0.332875	61.087	18.4958	0.31277	5.5892	1.08798	0.0782576	1.98536	1061.05	10.644	8.6835
91C.20.1	0.192919	75.0695	27.8085	0.382661	5.53984	0.991359	0.0729327	2.46161	1069.76	9.77197	-6.18578
91C.21.1	0.144584	74.6757	27.6212	0.382088	5.45889	1.48654	0.0723266	1.6121	1084.36	14.8366	-9.74247
91C.22.1	0.0729786	77.4676	25.316	0.337578	5.59318	0.945271	0.0736017	1.46959	1060.36	9.24228	-3.13509
91C.23.1	-0.122835	70.3033	23.26	0.341771	5.58475	1.00423	0.0757637	1.61424	1061.83	9.83129	2.68953
91C.24.1	0.229782	76.8966	24.4253	0.328121	5.65458	0.968056	0.0726792	2.70112	1049.73	9.37774	-4.82121
91C.25.1	9.63944e-10	67.7476	22.1992	0.338489	5.51933	0.982536	0.0740159	2.14513	1073.42	9.71546	-3.28474
91C.26.1	-0.063712	78.1419	26.1334	0.345472	5.50271	0.887185	0.0741775	1.35188	1076.41	8.79505	-3.12497
91C.27.1	0.0317293	87.2662	30.0673	0.355917	5.54526	0.884981	0.0742394	1.30323	1068.8	8.71617	-2.15564
91C.28.1	0.138284	86.3164	30.0394	0.3595	5.61646	0.918299	0.0740309	1.53944	1056.3	8.94698	-1.45551
91C.29.1	-0.223391	79.6438	26.1358	0.338987	5.51859	0.964854	0.0752177	1.67201	1073.56	9.5417	0.0774422
91C.30.1	0.168056	70.0572	22.6807	0.33443	5.64085	1.01824	0.0737937	2.46377	1052.09	9.88427	-1.70116
91C.31.1	-4.48512e-10	68.2607	21.8105	0.330062	5.48469	1.05216	0.0748595	1.48031	1079.67	10.4595	-1.52342
91C.32.1	9.43549e-11	81.7002	26.7609	0.338359	5.5474	0.960322	0.0731466	1.3668	1068.42	9.45511	-5.37326
91C.33.1	-0.366461	81.6916	27.0974	0.34265	5.58547	0.954171	0.0769216	1.79856	1061.71	9.34023	5.5671
91C.34.1	0.0751729	77.9516	25.2674	0.334838	5.55607	0.965537	0.0743254	1.49362	1066.88	9.49387	-1.71166
91C.35.1	0.0308042	100.796	34.1903	0.350397	5.53973	0.868656	0.0729197	2.31346	1069.78	8.5626	-6.22892
91C.36.1	-0.0457729	66.2854	19.9726	0.311256	5.60832	1.0542	0.0772601	1.56703	1057.72	10.2837	6.747
91C.37.1	-0.137067	68.5197	21.7226	0.327489	5.49606	1.06192	0.0752766	1.71638	1077.61	10.538	-0.173101
91C.38.1	0.0784063	78.0636	26.2815	0.347778	5.58732	0.981762	0.0778288	1.49683	1061.38	9.60762	7.69987
91C.39.1	0.182659	65.8645	20.3258	0.318785	5.6815	1.05388	0.0758829	1.81028	1045.14	10.168	4.64651
91C.40.1	0.0465403	64.2275	19.7673	0.317927	5.56776	1.07228	0.0737941	1.61	1064.82	10.5247	-3.035
91C.41.1	-0.087409	67.3084	21.9153	0.33634	5.56312	1.04306	0.0754578	1.6049	1065.64	10.2451	1.51434
91C.42.1	0.48248	80.133	26.7857	0.345297	5.59914	0.92934	0.0689533	2.11464	1059.32	9.07832	-19.5804

## Sheet: Table 91U
Spot Name	4-corr %com 206Pb	ppm U	ppm Th	232Th/ 238U	4corr 238U /206Pb*	% err	204Pb corr 207Pb* /206Pb*	% err	204Pb corr 206Pb /238U Age, Ma	1σ err, Ma	% Dis- cor- dant
91U.1.1	-0.0393724	70.333	24.1684	0.354968	5.60164	0.987469	0.0775027	1.42484	1058.88	9.6425	7.19598
91U.2.1	0.155846	73.6657	25.0697	0.351547	5.51074	0.985655	0.0729341	1.68223	1074.97	9.75917	-6.74225
91U.3.1	-0.109591	62.7886	21.4954	0.353642	5.49593	0.951106	0.074949	1.50763	1077.63	9.43855	-1.06831
91U.4.1	0.269285	69.4991	23.677	0.351924	5.53398	0.977302	0.0726322	1.84476	1070.81	9.64205	-7.2568
91U.5.1	-0.0762603	69.9426	24.0964	0.355885	5.57711	1.71951	0.0762509	1.4807	1063.17	16.8534	3.78976
91U.6.1	-0.0367756	75.9503	26.4125	0.359237	5.55066	0.9518	0.0741198	1.41616	1067.84	9.36652	-2.4005
91U.7.1	-0.220913	74.0123	26.0049	0.362954	5.48126	0.959699	0.0774561	1.62307	1080.29	9.5454	5.04835
91U.8.1	-0.22948	49.355	13.9914	0.29284	5.45346	1.91215	0.0778177	3.63261	1085.36	19.1006	5.40879
91U.9.1	0.125304	89.1094	30.8704	0.357865	5.62552	1.37003	0.0726401	1.46839	1054.73	13.33	-5.48654
91U.10.1	0.262764	53.4035	13.5155	0.261435	5.62108	2.08335	0.0729757	1.95786	1055.5	20.2839	-4.51798
91U.11.1	0.028251	96.5683	34.3056	0.366971	5.53136	0.838321	0.0737912	1.23276	1071.27	8.27418	-3.72173
91U.12.1	0.195079	76.2788	26.6143	0.360422	5.72982	0.976392	0.0770532	1.68772	1037	9.35274	8.25081
91U.13.1	-0.223872	80.4119	28.4958	0.366067	5.52773	0.959194	0.0763841	1.66346	1071.92	9.47245	3.26384
91U.14.1	0.217292	80.5529	28.0376	0.359551	5.54284	0.955396	0.071383	1.73202	1069.23	9.41317	-11.3019
91U.15.1	-0.388449	66.4796	20.7722	0.322772	5.47515	1.74494	0.0777102	1.97141	1081.4	17.3719	5.53521
91U.16.1	0.0367152	77.2495	26.3778	0.35273	5.50321	0.955024	0.074504	1.42318	1076.32	9.46683	-2.17849
91U.17.1	-0.108122	52.7864	15.1831	0.297125	5.66263	1.15111	0.0768901	1.79776	1048.35	11.1375	6.7799
91U.18.1	-0.0817098	69.2098	23.9424	0.357356	5.61626	1.00529	0.0754822	1.55312	1056.34	9.79486	2.50956
91U.19.1	0.297224	84.8145	29.7045	0.361787	5.58486	1.63835	0.0729748	1.74558	1061.81	16.0391	-5.19871
91U.20.1	0.0971513	91.8734	32.0014	0.359815	5.53139	1.56305	0.0753721	1.41398	1071.27	15.4272	0.72162
91U.21.1	0.378715	66.635	22.1604	0.343539	5.51247	1.0238	0.0714698	3.43892	1074.66	10.1342	-11.607
91U.22.1	0.156541	92.9339	32.8657	0.365317	5.5813	0.877199	0.0733377	1.50205	1062.44	8.59221	-4.14893
91U.23.1	0.252307	58.1756	14.9627	0.265686	5.64882	1.11658	0.0745762	2.05594	1050.72	10.8259	0.654314
91U.24.1	-0.247002	104.785	37.1857	0.366586	5.50654	0.82664	0.0766855	1.44015	1075.72	8.19001	3.63831
91U.25.1	-0.110471	96.1713	34.3708	0.369185	5.52389	0.824746	0.0757365	1.30126	1072.61	8.14951	1.54672
91U.26.1	9.42981e-11	74.0174	24.8543	0.346871	5.50551	1.54109	0.0743494	1.37044	1075.91	15.2709	-2.57674
91U.27.1	0.245578	69.4784	23.7137	0.352574	5.54187	1.6139	0.0739772	1.84627	1069.4	15.9035	-2.9777
91U.28.1	0.0862309	170.639	65.0083	0.393541	5.60199	0.653221	0.0762589	1.01782	1058.82	6.37828	4.23696
91U.29.1	0.119407	49.5162	13.058	0.272413	5.59364	2.00135	0.0748693	3.88807	1060.28	19.5666	0.48051
91U.30.1	-0.0409027	72.9459	25.1237	0.355782	5.52818	0.999535	0.0740674	1.49286	1071.84	9.87016	-2.96928
91U.31.1	-0.0612982	95.9282	33.4462	0.360165	5.53369	0.877797	0.074894	2.28964	1070.86	8.66071	-0.529759
91U.2.2	0.202603	72.9126	25.0633	0.355089	5.51444	1.0153	0.074244	1.76566	1074.3	10.047	-2.7136
91U.6.2	-0.197902	75.605	26.2828	0.359105	5.61078	0.985667	0.078234	1.65385	1057.29	9.6116	8.98331
91U.14.2	-0.107351	81.3363	28.3158	0.359621	5.54432	0.957115	0.0754225	2.20213	1068.97	9.42796	1.08709
91U.12.2	-0.0396393	78.6056	27.2836	0.358549	5.481	0.995272	0.0750436	1.45359	1080.34	9.89961	-1.0833
91U.24.2	-0.181168	98.0038	34.6082	0.364784	5.45077	0.869527	0.0755923	1.4501	1085.85	8.68939	-0.15609
91U.22.2	0.235218	89.3091	31.6536	0.366123	5.57531	0.913652	0.0724873	1.6815	1063.49	8.95741	-6.92786
91U.20.2	0.314993	94.4875	33.2373	0.363372	5.57981	0.885661	0.0722818	2.95096	1062.7	8.67706	-7.51129
91U.18.2	3.20919e-10	70.0208	24.3504	0.359236	5.51103	1.03046	0.0740312	1.45502	1074.91	10.2023	-3.3956
91U.29.2	-0.266661	55.6688	14.2972	0.265302	5.4391	1.16665	0.0776986	2.0205	1087.99	11.6798	4.88223
91U.3.2	0.229907	64.631	21.7725	0.347991	5.61202	1.07303	0.0727524	1.95813	1057.07	10.4616	-5.38449
91U.11.2	0.258411	91.7378	31.9429	0.359688	5.57249	0.847282	0.0760633	1.5354	1063.99	8.31029	3.2392

## Sheet: Table T2C
Spot Name	4-corr %com 206Pb	ppm U	ppm Th	232Th/ 238U	4corr 238U /206Pb*	% err	204Pb corr 207Pb* /206Pb*	% err	204Pb corr 206Pb /238U Age, Ma	1σ err, Ma	% Dis- cor- dant
T2C.1.1	0.0558551	402.325	223.566	0.574023	14.9552	0.52562	0.0548027	1.18667	417.249	2.12368	-3.33826
T2C.2.1	0.0715078	338.645	134.462	0.410161	15.1438	0.583526	0.0555835	2.0577	412.215	2.33009	5.58008
T2C.3.1	6.68296e-11	312.317	155.18	0.513264	15.0632	0.615766	0.0547848	1.27299	414.351	2.47116	-2.78902
T2C.4.1	-0.145702	239.831	93.4997	0.402723	14.8523	0.644917	0.0548583	1.62432	420.049	2.6226	-3.45506
T2C.5.1	-0.237849	170.563	65.7027	0.397924	15.0191	0.820012	0.0568517	2.2251	415.53	3.2999	14.9325
T2C.6.1	0.0827084	274.352	94.1916	0.354653	14.9017	0.626978	0.0550544	1.47492	418.7	2.54172	-1.06313
T2C.7.1	-0.0415689	191.073	72.2585	0.390652	14.9663	0.769479	0.055982	1.67697	416.95	3.10678	7.93493
T2C.8.1	-4.1517e-10	290.729	102.136	0.362905	14.7985	1.12749	0.0555127	1.2816	421.525	4.60059	2.72156
T2C.9.1	0.051882	459.549	270.403	0.607828	14.9467	0.500143	0.0549404	1.1197	417.478	2.02181	-1.93482
T2C.10.1	0.146504	322.553	207.666	0.665065	14.9808	0.968765	0.0533024	1.54428	416.558	3.90785	-22.6275
T2C.11.1	-0.0741197	294.576	193.948	0.680124	14.9505	1.45577	0.0545364	1.36566	417.376	5.88354	-6.33206
T2C.12.1	-0.117209	408.187	236.903	0.599531	14.7723	0.53083	0.0567154	1.25797	422.249	2.16959	12.521
T2C.13.1	0.0378472	419.492	112.973	0.278197	14.8029	0.522499	0.0564142	1.11973	421.405	2.13141	10.425
T2C.14.1	0.306363	333.779	135.756	0.420144	15.003	1.0392	0.0524769	1.89395	415.963	4.18615	-36.9985
T2C.15.1	0.0213514	385.928	231.571	0.619837	14.7546	0.554304	0.0549032	1.17498	422.739	2.26808	-3.65802
T2C.16.1	-0.149674	287.372	166.872	0.599846	14.9307	1.04998	0.0567157	1.61519	417.911	4.24878	13.4512
T2C.17.1	-0.0993291	244.645	151.274	0.638744	14.9741	0.684785	0.0559758	1.62408	416.739	2.76348	7.93099
T2C.18.1	0.0131703	648.353	407.565	0.64936	14.8881	0.435705	0.0566216	0.896782	419.069	1.76782	12.5098
T2C.19.1	-0.0508983	313.229	170.016	0.560696	14.8462	1.07333	0.0551772	1.33961	420.214	4.3664	-0.197541
T2C.20.1	0.0947978	276.802	76.7436	0.2864	14.875	0.66823	0.0545862	1.60712	419.428	2.71351	-6.30038
T2C.21.1	0.291436	179.514	102.093	0.587488	15.0404	0.772602	0.0519353	2.4065	414.961	3.10498	-48.3863
T2C.22.1	0.32573	267.358	155.896	0.602342	15.019	1.05251	0.0526449	2.0637	415.534	4.23555	-33.6005
T2C.23.1	0.0776453	629.365	399.63	0.655928	14.923	0.851471	0.0544278	1.00653	418.119	3.44716	-7.79086
T2C.24.1	0.104623	395.552	255.395	0.666974	14.9811	1.13028	0.0543263	1.33004	416.552	4.55932	-8.57857
T2C.25.1	0.0190026	375.172	250.748	0.69041	14.7355	0.520413	0.0546581	1.10567	423.271	2.132	-6.48736
T2C.26.1	0.0411422	374.445	118.842	0.327854	14.9572	0.943084	0.0552921	1.97381	417.195	3.80988	1.67075
T2C.27.1	0.164109	731.625	480.578	0.67854	14.8849	0.678912	0.0535462	1.02991	419.157	2.75517	-19.7024
T2C.28.1	-0.0889291	275.746	153.793	0.576139	14.7943	1.27011	0.0559649	1.5157	421.641	5.18391	6.72011
T2C.29.1	0.085165	190.694	107.716	0.583504	14.9817	0.777949	0.053286	1.88033	416.535	3.13796	-22.8785
T2C.30.1	-0.119849	429.802	211.98	0.509479	14.7969	0.53522	0.0560723	1.28293	421.57	2.18413	7.63897
T2C.31.1	-0.0186841	916.944	359.203	0.404667	14.9215	0.368049	0.05483	0.773971	418.162	1.49018	-3.27818
T2C.32.1	0.099862	337.906	150.921	0.461374	14.7499	0.600314	0.0538425	1.46168	422.87	2.45708	-16.5556
T2C.33.1	0.161699	417.152	305.033	0.755356	15.0688	0.540015	0.0551084	1.39289	414.203	2.16641	0.600099
T2C.34.1	-5.26449e-10	170.151	98.4358	0.597613	15.0464	1.79469	0.0543722	1.79934	414.8	7.20995	-7.56168
T2C.35.1	1.09707e-10	383.237	189.726	0.511399	14.9179	0.558514	0.0552607	1.14266	418.26	2.26187	1.10585
T2C.36.1	0.0839652	402.44	147.655	0.379007	15.1476	0.548714	0.055744	1.27867	412.114	2.19056	7.02061
T2C.37.1	-0.0677572	245.087	93.132	0.392536	14.9244	0.698381	0.0561553	1.5693	418.082	2.82713	9.10708
T2C.38.1	0.0887136	193.951	82.4995	0.4394	15.0756	0.794029	0.0559534	1.86726	414.023	3.18412	8.36348
T2C.40.1	0.106927	323.242	95.7984	0.306147	14.9974	0.619476	0.0547079	2.33945	416.112	2.49628	-4.07737
T2C.41.1	-0.19617	171.899	56.8293	0.341507	14.7974	0.840395	0.0579769	2.1424	421.555	3.42938	20.963
T2C.42.1	0.111977	222.893	137.998	0.63955	15.0115	0.803252	0.0549238	1.78787	415.733	3.23398	-1.66897
T2C.39.1	0.322904	232.66	163.945	0.727909	14.3829	0.686445	0.0524757	2.16181	433.304	2.87664	-42.9289
