# Supplementary material for: Effect of chemical abrasion of zircon on SIMS U–Pb, δ 18 O, trace element, and LA-ICPMS trace element and Lu–Hf isotopic analyses
Source: Copernicus journal article supplement (doi:10.5194/gchron-6-337-2024), 2024-07-10
Supplement: Supplementary file 7 [file Table S4-SH2-U-Pb-GA6363-T2Cref.xls]

## Sheet: OGCtab
Spot Name	4-corr %com 206	ppm U	ppm Th	232Th /238U	4corr 238 /206*	% err	4corr 207* /206*	% err	204corr 206Pb /238U Age	1s err	% Dis- cor- dant
OGC.1.1	0.0236525	186.748	127.625	0.705959	1.4159	1.21144	0.299185	0.26476	3444.36	32.3253	0.806113
OGC.2.1	0.00891802	116.55	61.829	0.548002	1.41179	0.66917	0.300094	0.3444	3452.12	17.8861	0.691613
OGC.3.1	0.0266415	192.567	150.053	0.80494	1.42365	0.5191	0.29824	0.26649	3429.81	13.807	1.16577
OGC.4.1	0.0256031	69.1984	42.0179	0.627247	1.39988	1.27452	0.301506	0.412548	3474.83	34.2354	0.117035
OGC.5.1	0.0080243	119.855	70.5393	0.607962	1.41919	0.629755	0.300795	0.324691	3438.17	16.7811	1.34224
OGC.6.1	0.0184585	179.211	109.467	0.630988	1.40122	0.908628	0.299628	0.266075	3472.25	24.3934	-0.147203
OGC.7.1	0.0146049	132.519	79.5278	0.619926	1.42136	0.606822	0.299127	0.311133	3434.11	16.1555	1.17594
OGC.8.1	0.00941706	164.424	159.072	0.999375	1.4398	0.928178	0.299562	0.28824	3399.91	24.5242	2.52374
OGC.9.1	0.00553567	92.5959	60.0713	0.670155	1.42138	0.742804	0.298083	0.381506	3434.06	19.7756	0.97765
OGC.10.1	0.0152226	163.038	88.2032	0.558849	1.4189	0.988387	0.300061	0.284008	3438.72	26.3407	1.18286
OGC.11.1	-0.0226608	176.367	116.418	0.681874	1.4034	1.03215	0.301313	0.273671	3468.08	27.6843	0.331305
OGC.12.1	0.0155888	94.9547	52.5657	0.571856	1.40303	0.723653	0.299843	0.370332	3468.8	19.4129	0.0230155
OGC.13.1	0.0125197	127.892	71.8498	0.580341	1.41659	0.648688	0.299634	0.333567	3443.06	17.3042	0.940095
OGC.14.1	0.0462489	114.909	63.401	0.569957	1.41163	0.677758	0.300824	0.554021	3452.43	18.1168	0.819256
OGC.15.1	0.0225941	179.047	159.498	0.920212	1.39324	0.540867	0.298844	0.274649	3487.61	14.5688	-0.873678
OGC.16.1	-0.0351762	101.894	57.6678	0.584636	1.41976	1.0947	0.299857	0.341842	3437.1	29.1636	1.20388
OGC.17.1	0.0290564	143.417	111.962	0.806434	1.43044	1.11274	0.299431	0.308693	3417.19	29.514	1.86089
OGC.18.1	-0.0165768	160.866	92.0879	0.59134	1.41665	0.575423	0.298861	0.296313	3442.95	15.3494	0.796357
OGC.19.1	-0.00341372	146.821	83.919	0.590436	1.41156	0.588289	0.299298	0.300268	3452.57	15.7258	0.522653
OGC.20.1	0.026166	205.462	146.235	0.735225	1.41388	1.10751	0.298061	0.575935	3448.17	29.5768	0.447959
OGC.21.1	2.9664e-18	80.7035	63.3418	0.810771	1.41616	1.53336	0.299833	0.395907	3443.87	40.9108	0.94806
OGC.22.1	-0.0200371	148.186	82.5494	0.575448	1.41166	1.05926	0.299695	0.296666	3452.37	28.3143	0.60622
OGC.23.1	-0.0152602	202.168	106.763	0.545519	1.40147	0.508067	0.300031	0.260068	3471.78	13.6384	-0.0520788
OGC.24.1	0.0486649	84.2629	54.2021	0.664477	1.42889	0.778416	0.299526	0.401765	3420.05	20.6596	1.77271
OGC.25.1	0.00992157	139.928	83.9993	0.620112	1.40933	0.577711	0.299092	0.296005	3456.79	15.4573	0.325671
OGC.26.1	-0.0312436	121.752	119.174	1.01112	1.40673	0.628811	0.299382	0.323657	3461.73	16.8427	0.197572
OGC.27.1	0.00589465	80.5506	47.5961	0.610384	1.41255	0.7679	0.297272	0.395071	3450.68	20.5185	0.201236
OGC.28.1	-0.039612	118.424	66.1207	0.576766	1.41717	0.663244	0.302456	0.341072	3441.97	17.6882	1.51453
OGC.29.1	-6.34213e-12	203.055	106.762	0.54313	1.42155	0.507003	0.301161	0.258691	3433.75	13.4969	1.57511
OGC.30.1	-0.0363639	100.7	59.5518	0.610894	1.39332	0.728982	0.298615	0.374521	3487.45	19.6351	-0.912434
OGC.31.1	0.0077814	205.22	197.66	0.994947	1.41172	0.512426	0.299521	0.262021	3452.25	13.6969	0.57705
OGC.32.1	-0.00984697	115.463	63.4229	0.567421	1.4385	1.16289	0.299298	0.569738	3402.3	30.7421	2.38575
OGC.33.1	-0.0477658	119.088	68.2599	0.592103	1.40473	0.663423	0.297986	0.341717	3465.54	17.7845	-0.215208
OGC.34.1	1.41393e-11	186.304	144.518	0.801308	1.40312	0.534531	0.300108	0.273304	3468.63	14.3389	0.0802341
OGC.35.1	-0.00652695	159.326	163.141	1.05774	1.40933	0.917317	0.3004	0.461992	3456.8	24.5438	0.576426
OGC.36.1	-0.0120866	181.737	116.187	0.660414	1.40554	0.54735	0.299961	0.283008	3464	14.668	0.224469
OGC.37.1	-0.00627636	84.8833	53.7144	0.653685	1.41637	0.793342	0.298553	0.406759	3443.48	21.1649	0.717535
OGC.38.1	2.11292e-11	123.466	63.8742	0.534416	1.39283	0.658966	0.29861	0.536403	3488.4	17.7529	-0.948836
OGC.39.1	-0.00605436	173.309	105.347	0.627918	1.41308	1.03318	0.300004	0.284689	3449.68	27.6009	0.765326
OGC.40.1	-0.00486502	111.463	64.2674	0.595606	1.39403	0.703769	0.298535	0.36001	3486.08	18.9504	-0.876763
OGC.41.1	0.0136137	112.564	97.4005	0.893842	1.38824	0.685957	0.299657	0.346821	3497.31	18.5155	-1.07819
OGC.42.1	8.67099e-12	144.01	126.602	0.908127	1.3943	0.947995	0.299332	0.30318	3485.57	25.5239	-0.702257

## Sheet: OGUtab
Spot Name	4-corr %com 206	ppm U	ppm Th	232Th /238U	4corr 238 /206*	% err	4corr 207* /206*	% err	204corr 206Pb /238U Age	1s err	% Dis- cor- dant
OGU.1.1	5.03048e-11	131.112	131.934	1.03948	1.43575	0.628767	0.298337	0.324554	3407.37	16.6409	2.01661
OGU.3.1	1.64671e-11	156.085	157.933	1.04523	1.42306	0.575566	0.298561	0.295211	3430.92	15.3126	1.18605
OGU.4.1	0.0327579	92.481	76.4672	0.854128	1.40405	0.689723	0.301036	0.352249	3466.84	18.4948	0.324415
OGU.5.1	0.0251855	203.522	173.833	0.88231	1.4016	0.484723	0.299007	0.248068	3471.53	13.011	-0.240236
OGU.6.1	-0.0131902	113.773	106.644	0.968273	1.43096	0.659263	0.300107	0.341002	3416.22	17.4823	2.02433
OGU.7.1	-0.0234784	146.475	129.923	0.916263	1.41637	1.16427	0.299194	0.300154	3443.48	31.0606	0.840435
OGU.8.1	0.0571915	163.686	160.389	1.01219	1.41813	0.54702	0.30037	0.284707	3440.16	14.5828	1.18807
OGU.10.1	0.00420581	118.762	102.958	0.895539	1.40984	0.648861	0.299075	0.332078	3455.82	17.3573	0.358737
OGU.13.1	0.01203	169.154	151.367	0.924379	1.4237	0.551012	0.29959	0.281564	3429.72	14.6555	1.42662
OGU.14.1	-0.0025296	207.492	148.194	0.737781	1.43971	1.01301	0.299176	0.257699	3400.08	26.7665	2.44499
OGU.15.1	0.0138936	188.999	176.796	0.966301	1.41143	0.530022	0.298476	0.273011	3452.8	14.1689	0.355455
OGU.16.1	0.0173177	187.045	199.147	1.09984	1.39707	0.735557	0.299046	0.421328	3480.22	19.7812	-0.557703
OGU.17.1	-0.00399985	126.19	112.987	0.924914	1.42526	0.631684	0.301316	0.324383	3426.81	16.7903	1.86041
OGU.18.1	0.0272756	191.031	141.955	0.767626	1.40883	0.527641	0.297507	0.271653	3457.74	14.1205	-0.0165886
OGU.19.1	0.0139691	171.062	109.869	0.663474	1.40855	1.07961	0.299191	0.273416	3458.28	28.8956	0.289332
OGU.20.1	-7.45492e-12	181.607	106.299	0.604642	1.40143	0.552002	0.298141	0.281388	3471.85	14.818	-0.420754
OGU.21.1	0.025745	167.31	90.3639	0.557923	1.40292	0.536278	0.298552	0.276947	3468.99	14.3869	-0.233941
OGU.22.1	0.00405813	130.553	117.626	0.930718	1.42984	0.631507	0.299291	0.327207	3418.3	16.754	1.79305
OGU.24.1	-0.0131588	156.957	84.919	0.558889	1.41985	0.575008	0.298403	0.295071	3436.93	15.3181	0.932171
OGU.25.1	0.0304899	157.989	117.098	0.765636	1.41419	1.15312	0.298976	0.279389	3447.58	30.7909	0.646248
OGU.26.1	0.0636463	117.551	98.5945	0.866417	1.42154	0.628574	0.298945	0.326626	3433.77	16.7334	1.1538
OGU.27.1	-0.00497016	194.963	174.996	0.927209	1.41174	1.01153	0.300521	0.399513	3452.22	27.0376	0.769439
OGU.28.1	-0.0226443	160.117	165.928	1.07049	1.42732	0.570454	0.299998	0.292373	3422.97	15.15	1.75396
OGU.29.1	0.0148703	169.338	166.396	1.01505	1.41317	0.98749	0.299738	0.281525	3449.52	26.3793	0.720113
OGU.30.1	-0.00271041	192.852	200.818	1.07567	1.41666	1.05888	0.300043	0.43471	3442.93	28.2456	1.02334
OGU.31.1	-0.0059186	89.4134	62.582	0.723015	1.42081	0.770741	0.300846	0.394965	3435.12	20.5241	1.46466
OGU.32.1	0.0440112	225.497	237.989	1.09022	1.43222	0.483061	0.297458	0.249779	3413.88	12.8032	1.60742
OGU.33.1	-0.00415059	127.286	107.877	0.875485	1.40599	0.648681	0.300556	0.331114	3463.14	17.3802	0.370543
OGU.34.1	-0.0172448	125.106	116.788	0.964323	1.41429	1.15236	0.297769	0.337431	3447.39	30.7693	0.420359
OGU.36.1	0.12922	212.072	239.827	1.16819	1.41036	1.2816	0.299725	0.270149	3454.84	34.276	0.519961
OGU.37.1	0.0752989	234.044	192.932	0.851542	1.42948	0.482542	0.298532	0.255639	3418.96	12.8038	1.62451
OGU.38.1	-0.00335656	157.951	87.4806	0.572125	1.42219	0.584445	0.298829	0.297788	3432.54	15.5544	1.17695
OGU.39.1	0.0127989	170.893	92.7952	0.560921	1.41887	0.561569	0.299624	0.476117	3438.77	14.9661	1.0977
OGU.41.1	0.0145466	187.614	97.5152	0.536918	1.42184	0.540866	0.299417	0.277977	3433.2	14.3967	1.26487
Ugrouped
OGU.2.1	0.0164616	149.681	186.366	1.28618	1.44548	0.57517	0.299932	0.293172	3389.52	15.1618	2.97595
OGU.9.1	0.0257013	127.28	114.343	0.928002	1.38166	0.624894	0.296796	0.313726	3510.14	16.9139	-2.12484
OGU.11.1	0.103894	222.183	249.362	1.15937	1.43227	0.45924	0.298655	0.276315	3413.78	12.1715	1.83965
OGU.12.1	0.00587966	159.913	166.134	1.07318	1.38572	0.563796	0.30098	0.284327	3502.21	15.2342	-1.00464
OGU.23.1	-0.0080936	125.583	111.538	0.917468	1.39421	0.644336	0.29883	0.329066	3485.74	17.3487	-0.806146
OGU.35.1	0.13925	197.697	194.644	1.01705	1.49155	0.989849	0.299266	0.287295	3307.59	25.6105	5.8517
OGU.40.1	-1.19762e-11	235.907	293.615	1.28569	1.44413	0.825406	0.299725	0.257243	3391.98	21.7701	2.84652
OGU.42.1	0.0113263	271.527	335.404	1.27601	1.46751	0.447156	0.299693	0.241636	3349.83	11.682	4.38819

## Sheet: QNCtab
Spot Name	4-corr %com 206	ppm U	ppm Th	232Th /238U	4corr 238 /206*	% err	4corr 207* /206*	% err	204corr 206Pb /238U Age	1s err	% Dis- cor- dant
QGC.1.1	0.0290937	244.698	253.965	1.07212	3.00417	0.492884	0.112522	0.485698	1852.28	7.93506	-0.733856
QGC.2.1	5.30387e-11	279.089	152.65	0.565008	3.03815	0.468926	0.113073	0.450909	1834.25	7.48584	0.940318
QGC.3.1	0.0314865	231.831	197.389	0.879533	3.0251	1.07163	0.112667	0.506913	1841.13	17.1627	0.108989
QGC.4.1	0.0423876	333.822	242.621	0.75078	3.00364	0.874861	0.113064	0.399473	1852.56	14.0865	-0.207432
QGC.5.1	0.0832869	125.257	112.918	0.931241	2.97967	0.663937	0.113244	0.673629	1865.5	10.7547	-0.832412
QGC.6.1	0.00756359	349.805	308.084	0.909797	3.01424	0.400749	0.113699	0.383463	1846.9	6.43557	0.770288
QGC.7.1	-0.0131144	213.801	168.32	0.813255	3.0157	0.936511	0.113528	0.785629	1846.12	15.0338	0.651368
QGC.8.1	0.0480066	258.88	247.078	0.985908	3.01844	0.471794	0.112146	0.474722	1844.66	7.56855	-0.638529
QGC.9.1	0.00731631	199.011	209.934	1.0897	3.05079	0.54794	0.11283	0.533543	1827.63	8.71991	1.11078
QGC.10.1	-0.00497051	273.843	261.076	0.98484	3.00975	0.740324	0.112974	0.439688	1849.29	11.9021	-0.0932983
QGC.11.1	0.0296525	233.054	236.455	1.04807	3.01184	0.495028	0.113693	0.49023	1848.18	7.95433	0.685654
QGC.12.1	0.00738865	191.92	179.931	0.968473	3.00739	0.553173	0.113434	0.538442	1850.56	8.89851	0.284145
QGC.13.1	-0.0237495	191.172	172.719	0.933289	3.01938	0.568528	0.112901	0.563967	1844.17	9.11825	0.153558
QGC.14.1	0.0137445	213.907	125.429	0.605725	2.99465	0.535923	0.113432	0.837582	1857.4	8.64853	-0.141528
QGC.15.1	7.58611e-18	160.327	133.319	0.858984	3.00723	0.987792	0.113181	0.591535	1850.64	15.8905	0.0285947
QGC.16.1	0.0890982	148.76	135.784	0.942894	3.03284	1.02648	0.11203	0.633717	1837.04	16.4081	-0.27883
QGC.17.1	-0.0110904	134.197	112.476	0.865799	2.98895	0.680808	0.112973	0.656398	1860.47	11.0023	-0.791132
QGC.18.1	-0.036558	190.505	207.117	1.12307	3.01117	1.11486	0.113009	0.828132	1848.54	17.917	-0.0112691
QGC.19.1	0.0186386	156.739	116.296	0.766453	3.0216	0.623277	0.111664	0.612069	1842.99	9.99081	-1.02701
QGC.20.1	0.00580217	257.067	213.969	0.859815	2.99718	0.495002	0.113898	0.472776	1856.03	7.98309	0.400739
QGC.21.1	-0.0315473	217.566	153.874	0.730591	3.01186	0.511218	0.113608	0.502945	1848.17	8.21444	0.603301
QGC.22.1	0.0197637	149.107	123.329	0.854409	3.0501	0.633712	0.111826	0.634049	1827.99	10.0866	0.0827335
QGC.23.1	-2.48683e-11	290.281	251.867	0.896298	2.97711	0.511169	0.113165	0.436144	1866.9	8.28544	-0.99891
QGC.24.1	1.1007e-10	131.267	92.9353	0.731348	3.02735	0.673493	0.113505	0.647996	1839.94	10.7803	1.01134
QGC.25.1	0.0343328	189.002	187.333	1.02388	3.0215	0.531059	0.113495	0.52701	1843.04	8.5128	0.810142
QGC.26.1	-0.0457646	169.471	138.342	0.843254	2.98127	0.565576	0.113778	0.560449	1864.63	9.15772	-0.248774
QGC.27.1	-0.0249854	265.515	259.305	1.00884	2.99039	0.460298	0.113633	0.444032	1859.69	7.43604	-0.085656
QGC.28.1	0.0369102	309.269	231.05	0.771736	2.9921	0.441779	0.112827	0.435837	1858.77	7.13382	-0.831344
QGC.29.1	-0.035701	122.181	91.7221	0.775478	3.00657	0.702233	0.114072	0.693015	1851	11.2987	0.881032
QGC.30.1	-0.0299879	200.222	159.537	0.823096	3.04669	0.556409	0.113448	0.547264	1829.77	8.86364	1.58467
QGC.31.1	0.0469987	127.529	113.069	0.915867	3.02032	1.31901	0.113079	0.695971	1843.67	21.1499	0.361115
QGC.32.1	5.55443e-11	209.787	184.481	0.908395	3.05635	0.967551	0.112821	0.537228	1824.74	15.3765	1.28188
QGC.33.1	0.0305018	198.563	214.832	1.11764	3.00943	0.563151	0.113695	0.555147	1849.46	9.05441	0.607999
QGC.34.1	0.00407941	376.368	205.478	0.563966	3.00476	0.95597	0.113261	0.39692	1851.97	15.3881	0.0261867
QGC.35.1	0.0165099	179.115	165.109	0.952226	2.98699	0.588988	0.113054	0.572683	1861.53	9.52312	-0.775843
QGC.36.1	0.034319	174.2	149.814	0.888388	3.01284	0.597005	0.111952	0.592816	1847.65	9.59058	-1.0239
QGC.37.1	0.0116945	256.039	254.969	1.02868	2.98422	0.544416	0.114328	0.477935	1863.03	8.80858	0.38745
QGC.38.1	-0.0542302	251.681	223.282	0.916437	3.01183	0.78033	0.115121	0.497724	1848.18	12.5388	2.05284
QGC.39.1	0.0136476	329.125	340.966	1.07016	3.01981	0.435922	0.112733	0.423965	1843.94	6.99071	0.000224068
QGC.40.1	0.105566	152.798	130.552	0.882604	3.03502	0.63379	0.11144	0.663834	1835.9	10.1255	-0.810667
QGC.41.1	-0.0236847	124.725	103.918	0.860674	2.98128	0.703931	0.113825	0.685089	1864.63	11.3979	-0.202362
QGC.42.1	-0.0119725	349.42	340.44	1.00645	2.99124	0.42485	0.114284	0.402797	1859.24	6.86193	0.578654

## Sheet: QNUtab
Spot Name	4-corr %com 206	ppm U	ppm Th	232Th /238U	4corr 238 /206*	% err	4corr 207* /206*	% err	204corr 206Pb /238U Age	1s err	% Dis- cor- dant
QGU.1.1	6.61563e-11	160.37	91.8984	0.591952	3.02998	1.09524	0.114032	0.580053	1838.55	17.5197	1.60793
QGU.2.1	0.0252028	168.336	157.456	0.966237	3.04475	0.59206	0.112459	0.585367	1830.79	9.43609	0.545897
QGU.3.1	0.0509429	169.404	147.33	0.898397	2.98915	0.596818	0.112989	0.596275	1860.37	9.6445	-0.767622
QGU.4.1	0.0281465	137.803	88.099	0.660409	3.00365	0.625849	0.113794	0.613513	1852.56	10.077	0.513399
QGU.5.1	0.102173	92.7402	56.4095	0.628326	3.00761	0.772719	0.11189	0.813766	1850.44	12.4295	-1.26297
QGU.6.1	0.00813715	164.912	101.955	0.638641	3.01453	0.583336	0.113263	0.56214	1846.74	9.36703	0.352189
QGU.7.1	0.00732992	189.333	167.197	0.912231	3.00623	0.552309	0.112654	0.533636	1851.18	8.88719	-0.531605
QGU.8.1	0.0106423	266.383	193.986	0.752252	3.01482	0.47309	0.114171	0.453253	1846.59	7.59619	1.24689
QGU.9.1	0.00723029	377.72	261.137	0.714167	3.028	0.669019	0.113556	0.375361	1839.6	10.707	1.08254
QGU.10.1	-0.0187792	306.739	248.233	0.835971	3.03146	0.487378	0.114465	0.430064	1837.77	7.79331	2.06931
QGU.12.1	0.0774517	203.718	113.825	0.577177	3.05103	0.538082	0.112972	0.552351	1827.51	8.56252	1.25858
QGU.13.1	0.0475636	305.656	243.953	0.824468	3.06233	0.444987	0.11323	0.445522	1821.63	7.06139	1.87562
QGU.14.1	0.00480343	629.179	425.278	0.698231	3.05817	0.728245	0.113436	0.304631	1823.79	11.5682	1.94198
QGU.15.1	-0.0499492	240.166	203.951	0.877232	3.03685	0.811344	0.113383	0.50758	1834.93	12.9563	1.20231
QGU.16.1	-0.0440494	455.383	331.124	0.751128	3.02896	0.606446	0.113223	0.348173	1839.09	9.70326	0.787639
QGU.17.1	0.0141512	310.203	246.273	0.820107	3.03258	0.440572	0.112129	0.434354	1837.18	7.0429	-0.186316
QGU.18.1	0.0224739	258.954	173.005	0.69014	2.98354	0.490247	0.113957	0.472491	1863.4	7.93349	0.00345762
QGU.19.1	-0.0157344	274.59	291.512	1.09666	3.03449	0.467495	0.11399	0.452345	1836.17	7.46976	1.71343
QGU.20.1	0.0340915	219.867	223.822	1.05158	3.0533	0.871596	0.111751	0.530483	1826.32	13.862	0.111312
QGU.21.1	0.0101048	270.03	181.568	0.694587	3.0276	0.905241	0.112591	0.445911	1839.81	14.4889	0.114686
QGU.22.1	0.0480555	240.444	198.264	0.851783	3.00675	0.497807	0.112524	0.500887	1850.9	8.00916	-0.645539
QGU.23.1	-0.0104925	141.444	106.225	0.775784	2.99921	1.21967	0.113785	0.637962	1854.94	19.6602	0.357159
QGU.24.1	-0.0190598	153.514	109.165	0.73457	3.01908	0.977056	0.113283	0.614962	1844.33	15.6715	0.52237
QGU.25.1	-0.0167949	230.04	165.783	0.744451	3.03867	0.478611	0.113371	0.470028	1833.97	7.63946	1.24997
QGU.26.1	0.0110639	623.405	416.933	0.69087	3.05091	0.790948	0.113107	0.310746	1827.57	12.5868	1.38724
QGU.28.1	0.0261599	226.588	225.672	1.02882	3.0417	0.516469	0.112409	0.789913	1832.39	8.23757	0.396194
QGU.29.1	0.0371782	283.913	277.382	1.00924	3.04031	0.728404	0.11288	0.46671	1833.12	11.6219	0.820062
QGU.30.1	-0.0272384	217.774	235.166	1.1155	3.03075	0.533573	0.113995	0.800487	1838.14	8.53347	1.5969
QGU.31.1	-1.41861e-11	257.806	267.525	1.07194	3.00251	0.48798	0.112971	0.466377	1853.17	7.85937	-0.337651
QGU.32.1	-0.021971	267.792	252.715	0.974839	3.04102	0.477366	0.112877	0.468748	1832.74	7.61514	0.840266
QGU.34.1	-0.0650448	114.491	66.4919	0.599924	3.04626	0.730053	0.114082	0.737289	1830	11.6311	2.18154
QGU.35.1	-0.0124336	120.425	83.4508	0.715839	2.96786	0.718844	0.112777	0.698017	1871.95	11.6788	-1.70618
QGU.36.1	0.0356071	242.89	186.72	0.794113	3.03864	0.501693	0.112526	0.490468	1833.99	8.00794	0.412872
QGU.37.1	0.00482828	597.644	505.772	0.874204	3.01727	0.628108	0.113237	0.305259	1845.29	10.0791	0.417238
QGU.38.1	0.00594364	512.584	409.033	0.824316	3.01366	0.646388	0.113023	0.339545	1847.21	10.3818	0.0857954
QGU.39.1	-0.0241296	124.308	92.561	0.769184	3.00317	0.706757	0.113337	0.699196	1852.82	11.3811	0.0485801
QGU.40.1	-0.0178046	506.015	320.364	0.654004	3.02714	0.355224	0.114025	0.341316	1840.05	5.68621	1.50844
QGU.1.2	0.0186388	160.471	94.9272	0.611076	3.02498	0.623084	0.11225	0.60983	1841.2	9.97934	-0.315638
QGU.2.2	-0.0406694	182.125	172.786	0.98003	3.02255	0.945707	0.112548	0.949595	1842.48	15.1556	-0.095215
Ungrouped
QGU.11.1	0.0229341	190.025	136.507	0.742069	3.09254	0.553256	0.112849	0.560044	1806.11	8.71467	2.46493
QGU.27.1	0.00431552	323.952	304.987	0.972525	3.07588	0.703139	0.110933	0.412833	1814.64	11.1208	0.00717433
QGU.33.1	-0.0383021	124.929	64.9997	0.537463	3.17647	1.09415	0.109854	0.724653	1764.36	16.8883	2.07534

## Sheet: 91Ctab
Spot Name	4-corr %com 206	ppm U	ppm Th	232Th /238U	4corr 238 /206*	% err	4corr 207* /206*	% err	204corr 206Pb /238U Age	1s err	% Dis- cor- dant
91C.1.1	0.0743579	80.2506	26.0456	0.335263	5.4763	0.955451	0.0757084	1.47957	1081.19	9.51041	0.617349
91C.2.1	0.280669	72.3913	23.7862	0.339422	5.65558	0.993196	0.0719253	1.91157	1049.56	9.61983	-7.24104
91C.3.1	-0.154864	79.3237	25.7138	0.33486	5.58114	0.872466	0.0769321	1.41986	1062.47	8.54605	5.5188
91C.4.1	0.0684074	76.4408	24.717	0.334019	5.65905	1.01821	0.0739861	1.42899	1048.97	9.85693	-0.819871
91C.5.1	-0.079441	66.3168	21.1675	0.32972	5.5347	0.992573	0.0765018	1.50643	1070.68	9.79164	3.67748
91C.6.1	0.167864	80.5724	26.7924	0.343499	5.60154	0.913721	0.073244	1.5726	1058.9	8.9225	-4.05699
91C.7.1	-0.0725046	74.6537	23.9847	0.331882	5.54737	0.952696	0.0745876	1.4512	1068.42	9.38005	-1.13047
91C.8.1	0.148271	76.8263	24.5818	0.330525	5.66613	0.961359	0.0758668	1.5803	1047.76	9.29673	4.34733
91C.9.1	-0.263082	75.3934	25.0539	0.343276	5.54177	0.965164	0.0768916	1.70507	1069.42	9.51095	4.75031
91C.10.1	-0.246693	69.6704	22.6385	0.33566	5.54013	0.935436	0.077368	2.52007	1069.71	9.22032	5.85213
91C.11.1	0.224005	63.2177	19.1707	0.313256	5.61416	1.0513	0.0737756	1.89981	1056.7	10.2464	-2.23749
91C.12.1	-9.39198e-11	76.3299	24.3997	0.33021	5.6218	0.959097	0.074548	1.36052	1055.38	9.33694	0.0988878
91C.13.1	0.222956	80.9246	26.5885	0.339401	5.56278	0.956684	0.0735184	1.72887	1065.7	9.3972	-3.94834
91C.14.1	-0.175765	97.7157	33.3044	0.352077	5.59675	0.856673	0.0749319	1.43412	1059.73	8.37149	0.705798
91C.15.1	-0.376753	71.2601	23.719	0.343836	5.54054	1.02026	0.0781001	1.91329	1069.64	10.0558	7.53143
91C.16.1	0.172478	76.3916	24.5555	0.33205	5.53173	0.94223	0.0728803	2.35939	1071.21	9.29923	-6.50719
91C.17.1	0.0771425	76.6371	24.8171	0.334513	5.58467	0.97287	0.073599	1.53124	1061.85	9.52443	-3.30015
91C.18.1	-0.108493	79.1798	26.0797	0.340242	5.50375	1.60537	0.0762795	1.47765	1076.22	15.9122	2.57939
91C.19.1	-0.332941	61.087	18.4958	0.31277	5.60005	1.08798	0.0782576	1.98537	1059.16	10.6266	8.8605
91C.20.1	0.192958	75.0695	27.8085	0.382661	5.5506	0.991361	0.0729327	2.46162	1067.85	9.75594	-5.97996
91C.21.1	0.144614	74.6757	27.6212	0.382088	5.46949	1.48654	0.0723266	1.61211	1082.43	14.8123	-9.52976
91C.22.1	0.0729931	77.4676	25.316	0.337578	5.60405	0.945272	0.0736017	1.46959	1058.46	9.22709	-2.93518
91C.23.1	-0.12286	70.3033	23.26	0.341771	5.59559	1.00423	0.0757637	1.61424	1059.93	9.81513	2.87815
91C.24.1	0.229827	76.8966	24.4253	0.328121	5.66556	0.968058	0.0726791	2.70113	1047.85	9.3623	-4.61804
91C.25.1	9.64139e-10	67.7476	22.1992	0.338489	5.53005	0.982536	0.0740159	2.14513	1071.51	9.69952	-3.08454
91C.26.1	-0.0637249	78.1419	26.1334	0.345472	5.51339	0.887186	0.0741775	1.35188	1074.49	8.78063	-2.92508
91C.27.1	0.0317357	87.2662	30.0673	0.355917	5.55603	0.884982	0.0742394	1.30323	1066.89	8.70185	-1.95763
91C.28.1	0.138311	86.3164	30.0394	0.3595	5.62737	0.9183	0.0740309	1.53945	1054.41	8.93227	-1.25885
91C.29.1	-0.223436	79.6438	26.1358	0.338987	5.52931	0.964856	0.0752177	1.67201	1071.64	9.52606	0.271127
91C.30.1	0.168089	70.0572	22.6807	0.33443	5.6518	1.01824	0.0737937	2.46377	1050.21	9.868	-1.50403
91C.31.1	-4.48603e-10	68.2607	21.8105	0.330062	5.49534	1.05216	0.0748595	1.48031	1077.74	10.4423	-1.32664
91C.32.1	9.43739e-11	81.7002	26.7609	0.338359	5.55817	0.960322	0.0731466	1.3668	1066.51	9.43957	-5.16901
91C.33.1	-0.366534	81.6916	27.0974	0.34265	5.59632	0.954174	0.0769216	1.79857	1059.81	9.3249	5.75014
91C.34.1	0.075188	77.9516	25.2674	0.334838	5.56686	0.965537	0.0743254	1.49363	1064.98	9.47828	-1.5145
91C.35.1	0.0308104	100.796	34.1903	0.350397	5.55049	0.868656	0.0729197	2.31346	1067.87	8.54854	-6.02301
91C.36.1	-0.045782	66.2854	19.9726	0.311256	5.61921	1.0542	0.0772601	1.56703	1055.83	10.2668	6.92775
91C.37.1	-0.137095	68.5197	21.7226	0.327489	5.50673	1.06192	0.0752766	1.71638	1075.69	10.5207	0.0210697
91C.38.1	0.0784219	78.0636	26.2815	0.347778	5.59817	0.981763	0.0778288	1.49683	1059.48	9.59183	7.87879
91C.39.1	0.182695	65.8645	20.3258	0.318785	5.69254	1.05388	0.0758829	1.81029	1043.27	10.1512	4.83135
91C.40.1	0.0465496	64.2275	19.7673	0.317927	5.57857	1.07228	0.0737941	1.61	1062.92	10.5074	-2.83528
91C.41.1	-0.0874265	67.3084	21.9153	0.33634	5.57393	1.04306	0.0754578	1.6049	1063.73	10.2283	1.70524
91C.42.1	0.482576	80.133	26.7857	0.345297	5.61002	0.929344	0.0689533	2.11466	1057.42	9.06341	-19.3487

## Sheet: 91Utab
Spot Name	4-corr %com 206	ppm U	ppm Th	232Th /238U	4corr 238 /206*	% err	4corr 207* /206*	% err	204corr 206Pb /238U Age	1s err	% Dis- cor- dant
91U.1.1	-0.0393802	70.333	24.1684	0.354968	5.61252	0.987469	0.0775027	1.42484	1056.99	9.62664	7.37586
91U.2.1	0.155877	73.6657	25.0697	0.351547	5.52144	0.985656	0.0729341	1.68223	1073.05	9.74316	-6.53535
91U.3.1	-0.109614	62.7886	21.4954	0.353642	5.50661	0.951107	0.0749491	1.50763	1075.71	9.42308	-0.872403
91U.4.1	0.269339	69.4991	23.677	0.351924	5.54473	0.977304	0.0726322	1.84477	1068.89	9.62624	-7.04891
91U.5.1	-0.0762756	69.9426	24.0964	0.355885	5.58794	1.71951	0.0762509	1.4807	1061.27	16.8257	3.97624
91U.6.1	-0.036783	75.9503	26.4125	0.359237	5.56144	0.9518	0.0741198	1.41616	1065.93	9.35114	-2.20201
91U.7.1	-0.220958	74.0123	26.0049	0.362954	5.4919	0.9597	0.0774561	1.62308	1078.36	9.52976	5.2324
91U.8.1	-0.229527	49.355	13.9914	0.29284	5.46405	1.91215	0.0778177	3.63262	1083.42	19.0693	5.59213
91U.9.1	0.125329	89.1094	30.8704	0.357865	5.63644	1.37003	0.0726401	1.46839	1052.85	13.308	-5.28207
91U.10.1	0.262816	53.4035	13.5155	0.261435	5.632	2.08335	0.0729757	1.95786	1053.61	20.2505	-4.31539
91U.11.1	0.0282567	96.5683	34.3056	0.366971	5.5421	0.838321	0.0737912	1.23276	1069.36	8.2606	-3.52068
91U.12.1	0.195117	76.2788	26.6143	0.360422	5.74095	0.976393	0.0770532	1.68772	1035.14	9.33731	8.42866
91U.13.1	-0.223917	80.4119	28.4958	0.366067	5.53846	0.959196	0.0763841	1.66347	1070.01	9.45692	3.45135
91U.14.1	0.217335	80.5529	28.0376	0.359551	5.5536	0.955398	0.071383	1.73202	1067.32	9.39772	-11.0861
91U.15.1	-0.388528	66.4796	20.7722	0.322772	5.48578	1.74494	0.0777102	1.97141	1079.47	17.3435	5.71831
91U.16.1	0.0367227	77.2495	26.3778	0.35273	5.5139	0.955024	0.074504	1.42318	1074.4	9.4513	-1.98043
91U.17.1	-0.108143	52.7864	15.1831	0.297125	5.67363	1.15111	0.0768902	1.79776	1046.48	11.1192	6.96059
91U.18.1	-0.081726	69.2098	23.9424	0.357356	5.62717	1.00529	0.0754822	1.55312	1054.45	9.77875	2.69853
91U.19.1	0.297283	84.8145	29.7045	0.361787	5.5957	1.63835	0.0729747	1.74559	1059.92	16.0127	-4.99481
91U.20.1	0.0971708	91.8734	32.0014	0.359815	5.54213	1.56305	0.075372	1.41399	1069.36	15.4018	0.914056
91U.21.1	0.378792	66.635	22.1604	0.343539	5.52318	1.0238	0.0714698	3.43893	1072.74	10.1176	-11.3907
91U.22.1	0.156572	92.9339	32.8657	0.365317	5.59214	0.8772	0.0733377	1.50205	1060.54	8.57809	-3.94705
91U.23.1	0.252357	58.1756	14.9627	0.265686	5.65979	1.11658	0.0745761	2.05595	1048.84	10.8081	0.846882
91U.24.1	-0.247052	104.785	37.1857	0.366586	5.51723	0.826642	0.0766855	1.44015	1073.8	8.17659	3.82509
91U.25.1	-0.110493	96.1713	34.3708	0.369185	5.53462	0.824746	0.0757365	1.30126	1070.69	8.13614	1.73755
91U.26.1	9.43172e-11	74.0174	24.8543	0.346871	5.5162	1.54109	0.0743494	1.37044	1073.99	15.2458	-2.37791
91U.27.1	0.245628	69.4784	23.7137	0.352574	5.55263	1.6139	0.0739772	1.84628	1067.49	15.8774	-2.77809
91U.28.1	0.086248	170.639	65.0083	0.393541	5.61287	0.653221	0.0762589	1.01782	1056.93	6.36779	4.42259
91U.29.1	0.119431	49.5162	13.058	0.272413	5.6045	2.00135	0.0748693	3.88808	1058.38	19.5345	0.673414
91U.30.1	-0.040911	72.9459	25.1237	0.355782	5.53892	0.999536	0.0740674	1.49287	1069.93	9.85396	-2.76969
91U.31.1	-0.0613106	95.9282	33.4462	0.360165	5.54443	0.877797	0.074894	2.28964	1068.95	8.6465	-0.334897
91U.2.2	0.202644	72.9126	25.0633	0.355089	5.52515	1.0153	0.0742439	1.76566	1072.38	10.0305	-2.51451
91U.6.2	-0.197942	75.605	26.2828	0.359105	5.62168	0.985669	0.078234	1.65386	1055.4	9.5958	9.15973
91U.14.2	-0.107373	81.3363	28.3158	0.359621	5.55509	0.957116	0.0754225	2.20213	1067.06	9.41248	1.27882
91U.12.2	-0.0396474	78.6056	27.2836	0.358549	5.49164	0.995272	0.0750436	1.4536	1078.41	9.88338	-0.88737
91U.24.2	-0.181205	98.0038	34.6082	0.364784	5.46136	0.869528	0.0755923	1.45011	1083.91	8.67517	0.0380482
91U.22.2	0.235265	89.3091	31.6536	0.366123	5.58614	0.913653	0.0724873	1.6815	1061.59	8.9427	-6.72061
91U.20.2	0.315056	94.4875	33.2373	0.363372	5.59065	0.885663	0.0722817	2.95096	1060.8	8.66281	-7.30291
91U.18.2	3.20984e-10	70.0208	24.3504	0.359236	5.52173	1.03046	0.0740312	1.45502	1073	10.1856	-3.19518
91U.29.2	-0.266716	55.6688	14.2972	0.265302	5.44966	1.16666	0.0776986	2.02051	1086.05	11.6607	5.06659
91U.3.2	0.229953	64.631	21.7725	0.347991	5.62292	1.07304	0.0727524	1.95814	1055.18	10.4444	-5.18022
91U.11.2	0.258463	91.7378	31.9429	0.359688	5.58331	0.847283	0.0760633	1.53541	1062.08	8.29665	3.42677

## Sheet: T2Utab
Spot Name	4-corr %com 206	ppm U	ppm Th	232Th /238U	4corr 238 /206*	% err	4corr 207* /206*	% err	204corr 206Pb /238U Age	1s err	% Dis- cor- dant
T2U.1.1	0.395653	166.484	100.163	0.621489	15.0468	0.849428	0.0520088	2.86817	414.79	3.41238	-46.6071
T2U.2.1	1.07207	69.5934	23.0686	0.342416	15.3434	2.10687	0.0484575	6.85122	407.019	8.31026	-242.084
T2U.3.1	0.452803	128.553	37.6694	0.302695	14.9677	0.966951	0.0526858	3.37371	416.911	3.90373	-33.2871
T2U.4.1	0.204182	71.33	24.1717	0.350054	15.3333	1.20716	0.0539287	3.36815	407.279	4.76442	-10.9922
T2U.5.1	-0.188552	78.2179	26.8356	0.35441	14.773	2.45093	0.0555994	3.02338	422.23	10.0169	3.35582
T2U.6.1	0.0659539	116.638	57.3794	0.508177	14.9314	1.50925	0.0533088	2.27861	417.892	6.10694	-22.933
T2U.7.1	-0.810244	68.8244	25.8694	0.388279	15.0661	1.30624	0.0630435	4.50594	414.274	5.24121	42.968
T2U.8.1	-0.110983	226.299	108.685	0.496119	15.0917	0.721677	0.0563969	1.71791	413.594	2.89108	12.007
T2U.9.1	0.187625	254.647	82.6223	0.335165	14.8181	1.10674	0.0544244	1.80973	420.986	4.51035	-8.59443
T2U.10.1	0.129615	247.849	137.806	0.574354	15.0372	0.685233	0.0552064	1.70176	415.045	2.75441	1.3613
T2U.11.1	0.0267956	283.169	138.869	0.506595	14.8223	0.615564	0.0556604	1.3345	420.871	2.50797	4.23171
T2U.12.1	0.559812	172.888	82.887	0.495247	14.9026	1.42277	0.0511133	3.16032	418.674	5.76745	-72.5483
T2U.13.1	1.49955e-10	140.793	65.0078	0.476964	14.9586	0.919503	0.0563695	1.89566	417.158	3.71431	11.0119
T2U.14.1	-0.175945	193.259	84.4974	0.451651	15.0763	0.794953	0.0566086	2.01151	414.002	3.18767	13.507
T2U.15.1	-0.169578	155.437	74.8986	0.497759	14.9136	0.894544	0.0570967	2.25702	418.377	3.6237	16.0339
T2U.16.1	0.239836	172.092	45.9598	0.275879	14.8449	1.29664	0.0522029	2.45101	420.249	5.27529	-44.207
T2U.17.1	-0.146447	156.294	79.4925	0.525392	14.9914	0.835189	0.0571695	2.05352	416.274	3.3668	16.959
T2U.18.1	0.415251	199.899	46.6379	0.241007	15.2096	0.778187	0.0523045	2.64861	410.487	3.09478	-38.612
T2U.19.1	0.291037	173.767	82.866	0.492617	15.1965	0.834046	0.0538774	2.53377	410.829	3.3196	-12.6664
T2U.20.1	0.150746	171.462	43.8979	0.26447	15.1405	0.846091	0.0506935	2.30852	412.302	3.37923	-84.3485
T2U.21.1	0.0789916	196.645	117.823	0.618937	14.8883	0.754987	0.0548629	1.77438	419.063	3.06323	-3.15534
T2U.22.1	-0.0152285	549.997	204.078	0.383297	15.1918	0.956522	0.0547989	0.984467	410.952	3.80818	-1.76894
T2U.23.1	0.319615	181.137	88.7722	0.506255	14.9435	0.80971	0.0526276	2.55093	417.565	3.27389	-34.6039
T2U.24.1	-0.296731	139.016	65.9061	0.489737	14.8165	0.925504	0.0558408	2.64854	421.029	3.77211	5.79336
T2U.25.1	-0.114732	210.94	101.586	0.497477	15.2512	0.743934	0.0571254	1.76077	409.403	2.95099	18.0829
T2U.26.1	-0.0924898	163.978	84.4466	0.531981	14.9484	0.81335	0.0576277	1.86691	417.434	3.2876	19.6663
T2U.27.1	0.240744	152.875	74.1468	0.501021	15.1839	0.826133	0.0540164	2.38857	411.162	3.29068	-10.9481
T2U.28.1	0.121106	335.058	114.793	0.353912	14.8607	0.588729	0.0543879	2.97523	419.816	2.39282	-8.71733
T2U.29.1	0.26172	219.321	103.848	0.489125	15.0409	0.735609	0.0526354	2.18488	414.947	2.95622	-33.5835
T2U.30.1	0.153146	169.564	81.3833	0.495795	15.0804	0.853839	0.0533912	2.24	413.895	3.42294	-20.454
T2U.31.1	-0.0594629	289.982	74.4452	0.265195	14.9636	0.64909	0.0556227	1.4675	417.023	2.62116	4.79736
T2U.32.1	0.119704	210.71	72.2727	0.354316	14.8601	0.754049	0.0542235	1.87888	419.835	3.06488	-10.7253
T2U.33.1	-0.107671	327.326	97.363	0.307265	15.2321	0.620011	0.0545032	1.49467	409.899	2.4623	-4.74012
T2U.34.1	-0.612918	126.847	60.9993	0.496759	14.9536	0.996312	0.0586397	3.35511	417.292	4.02583	25.4452
T2U.35.1	-0.693579	123.966	35.1808	0.293159	14.7273	1.01174	0.0605162	3.49143	423.498	4.14699	32.977
T2U.36.1	0.123756	138.167	61.5353	0.460066	15.2429	0.938206	0.0546788	2.35688	409.62	3.72352	-2.71699
T2U.37.1	0.531571	163.363	80.7784	0.51079	14.8878	0.880102	0.0513145	3.30627	419.079	3.57099	-66.4792
T2U.38.1	0.0850697	293.381	141.696	0.498913	14.9048	0.640622	0.0547902	1.50734	418.615	2.59652	-3.82348
T2U.39.1	1.2334	333.07	169.641	0.526134	15.044	1.95818	0.05485	5.53974	414.862	7.86785	-2.22459
T2U.40.1	-0.330111	105.934	48.7803	0.475673	14.8962	1.09404	0.0582833	3.11432	418.849	4.43669	23.2331
T2U.41.1	0.115937	361.33	186.807	0.534058	14.8995	0.582251	0.0551114	1.41296	418.758	2.36072	-0.499407
T2U.42.1	5.71971e-11	369.226	166.364	0.465443	14.9323	0.570205	0.0545513	1.17894	417.87	2.30713	-6.29081
