# Supplementary material for: Effect of chemical abrasion of zircon on SIMS U–Pb, δ 18 O, trace element, and LA-ICPMS trace element and Lu–Hf isotopic analyses
Source: Copernicus journal article supplement (doi:10.5194/gchron-6-337-2024), 2024-07-10
Supplement: Supplementary file 8 [file Table S5-SH2-UPb-MtPainter.xls]

## Sheet: MPC cores table
Spot Name	4-corr %com 206Pb	ppm U	ppm Th	232Th/ 238U	total 238U /206Pb*	% err	total 207Pb* /206Pb*	% err	4corr 238U /206Pb*	% err	204Pb corr 207Pb* /206Pb*	% err	204Pb corr 206Pb /238U Age, Ma	1σ err, Ma	% Dis- cor- dant
MPC2.85.2	0.00851964	334.151	142.185	0.439552	2.1476	0.739807	0.185529	1.44858	2.14779	0.739824	0.185455	1.44946	2464.22	15.151	10.5878
MPC2.2.2	-0.0425149	149.662	90.0599	0.621614	2.32873	1.78911	0.183702	1.40339	2.32774	1.78918	0.184064	1.402	2303.92	34.6596	17.0328
MPC2.65.2	0.0241175	316.637	205.735	0.671191	2.71425	1.67159	0.123702	1.19618	2.71491	1.67161	0.12349	1.2003	2021.57	29.0073	-0.831138
MPC2.43.2	0.0159763	171.066	67.8719	0.40985	2.91405	2.2781	0.1285	3.10467	2.91452	2.27813	0.128362	3.10943	1901.61	37.5161	9.67641
MPC2.28.2	-0.0616169	69.5757	84.9848	1.26178	2.95225	1.11277	0.112391	1.8264	2.95043	1.11334	0.112931	1.83741	1881.54	18.1678	-2.14904
MPC2.36.2	0.00672801	201.785	67.4908	0.345507	3.09027	6.4066	0.104765	3.65291	3.09048	6.40661	0.104706	3.65565	1807.16	100.965	-6.57752
MPC2.92.2	0.0701362	143.85	73.4681	0.527581	3.09454	1.41871	0.127938	4.68672	3.09671	1.419	0.127338	4.71602	1803.99	22.3288	14.3098
MPC2.82.2	-0.0189276	245.162	273.668	1.15311	3.12444	1.13331	0.10569	1.33913	3.12385	1.13336	0.105856	1.33983	1790.31	17.7168	-4.0462
MPC2.56.2	-0.0084458	386.408	76.8614	0.205477	3.19064	0.739986	0.111454	0.40784	3.19037	0.74001	0.111527	0.410168	1757.63	11.3842	4.18339
MPC2.81.2	-0.0809993	130.904	128.345	1.01281	5.00689	0.958429	0.078042	1.69863	5.00284	0.959283	0.0787262	1.73764	1174.71	10.3017	-0.887179
MPC2.87.2	0.0388045	425.657	358	0.868808	5.10994	1.16188	0.0803402	0.550064	5.11192	1.16199	0.0800137	0.577117	1151.75	12.2558	4.15569
MPC2.70.2	0.218436	159.748	70.0882	0.453221	5.32797	1.73359	0.0767133	0.995834	5.33964	1.73465	0.0748724	1.22995	1106.62	17.6387	-4.24477
MPC2.41.2	-0.123323	186.805	35.2031	0.194667	5.49243	3.62365	0.0753895	3.18651	5.48566	3.62391	0.0764241	3.17569	1079.49	36.0198	2.62219
MPC2.63.2	0.104309	233.34	220.239	0.975003	5.53001	0.796224	0.0760832	0.711336	5.53578	0.796909	0.0752077	0.809171	1070.49	7.86012	0.360765
MPC2.83.2	0.105624	176.97	74.9117	0.437271	5.62289	2.4861	0.0777528	2.43234	5.62884	2.48642	0.0768694	2.50099	1054.16	24.18	6.17106
MPC2.55.2	-0.0197873	487.524	38.0359	0.0805931	5.79824	2.84517	0.0770256	2.34562	5.7971	2.84519	0.0771905	2.3434	1025.87	26.984	9.62688
MPC2.64.2	0.20452	171.241	98.9577	0.596955	5.8012	0.865029	0.07592	0.877802	5.81309	0.866895	0.0742093	1.10466	1023.26	8.2024	2.46858
MPC2.58b.2	-0.0128977	264.58	138.231	0.539694	5.8255	1.11004	0.0752365	0.805873	5.82475	1.11011	0.0753442	0.817216	1021.37	10.4857	5.65122
MPC2.91.2	0.0616412	159.121	66.1348	0.429343	5.82244	1.62293	0.0744747	1.69211	5.82603	1.62333	0.0739591	1.75188	1021.16	15.3305	1.99466
MPC2.42.2	0.069823	171.889	62.4664	0.375404	5.87044	0.894121	0.0720551	0.937982	5.87454	0.894804	0.0714698	1.03125	1013.36	8.39078	-4.72823
MPC2.52.2	0.0720945	295.191	138.107	0.483296	5.93142	1.16819	0.0726528	1.75971	5.9357	1.16851	0.0720494	1.80376	1003.69	10.8607	-1.78838
MPC2.8.2	-0.0648652	263.78	132.32	0.518183	6.00137	1.83228	0.0752451	2.19874	5.99748	1.83251	0.0757851	2.20478	994.107	16.8819	9.43725
MPC2.53.2	0.0304845	307.471	144.544	0.485621	6.13302	1.01437	0.074044	1.36909	6.13489	1.01452	0.0737901	1.38851	973.439	9.16627	6.47925
MPC2.10.2	0.0268114	244.441	59.5866	0.251811	6.58703	3.26113	0.0759531	3.16784	6.58879	3.26119	0.0757317	3.18467	910.893	27.7026	17.4487
MPC2.90.2	0.165877	186.745	187.965	1.03975	6.62465	1.49164	0.0744281	0.94608	6.63566	1.49266	0.073055	1.15154	904.891	12.6018	11.6699
MPC2.79.2	-0.0360817	359.431	128.317	0.368781	6.72778	1.04635	0.070077	0.682662	6.72535	1.04651	0.0703763	0.711993	893.622	8.73258	5.21308
MPC2.25.2	-0.00835833	484.501	156.931	0.334592	7.14453	5.45357	0.0836189	5.24754	7.14393	5.45358	0.0836868	5.24348	844.544	43.1684	36.5592
MPC2.71.2	0.0897228	169.789	97.0686	0.590568	8.62175	2.2439	0.0691742	1.25565	8.62949	2.2445	0.0684413	1.41294	706.816	15.0257	20.9606
MPC2.104.2	-0.0255332	428.507	208.909	0.503616	9.21395	5.20751	0.0599732	0.910221	9.21159	5.20754	0.060183	0.939716	664.373	32.8744	-9.35105
MPC2.21.2	0.0302693	1039.32	42.121	0.0418649	9.31399	1.97905	0.0617915	1.41225	9.31681	1.97909	0.0615433	1.4279	657.24	12.3663	0.165802
MPC2.38.2	0.0473003	300.874	170.286	0.58465	9.49589	0.813616	0.0623515	0.92584	9.50038	0.814074	0.0619643	0.999511	645.155	4.99778	4.32935
MPC2.99.2	-0.0530821	319.632	104.888	0.338983	9.90193	4.18366	0.0595075	4.21708	9.89668	4.18377	0.0599421	4.20515	620.524	24.7509	-3.32029
MPC2.76.2	-0.0874001	415.81	8.37886	0.0208157	9.98473	0.770417	0.059993	0.851444	9.97601	0.771123	0.0607076	0.95098	615.818	4.52895	2.17926
MPC2.94.2	0.00853914	695.075	248.066	0.368668	10.1874	0.921722	0.0606923	0.689163	10.1883	0.921762	0.0606225	0.699542	603.568	5.31096	3.73219
MPC2.37.2	0.110976	347.343	231.29	0.687859	10.2576	1.09002	0.0606351	0.937717	10.269	1.09083	0.0597281	1.11286	599.038	6.24006	-0.934908
MPC2.26.2	0.0787077	456.378	173.602	0.392943	10.2899	1.05209	0.0602583	2.11101	10.298	1.05258	0.059615	2.18051	597.426	6.00578	-1.38479
MPC2.93.2	0.418273	117.991	119.725	1.04818	10.387	1.11569	0.0597283	1.71602	10.4306	1.12554	0.056298	2.83259	590.171	6.3476	-28.4192
MPC2.103.2	0.0891246	211.455	435.113	2.12561	10.4337	0.936655	0.0596402	1.31025	10.443	0.93807	0.0589116	1.50776	589.5	5.28461	-4.7641
MPC2.84.2	-0.165653	131.091	419.21	3.30339	10.4902	1.10245	0.0591315	1.61685	10.4728	1.10555	0.0604828	1.93245	587.897	6.21191	5.55977
MPC2.96.2	-0.0304038	195.933	226.04	1.19173	10.5885	0.939621	0.0612505	1.29789	10.5853	0.940113	0.0614981	1.35349	581.923	5.23107	11.9076
MPC2.62.2	-0.0526012	352.229	47.9667	0.140675	10.6024	1.14863	0.0613353	2.15039	10.5968	1.14904	0.0617635	2.17152	581.32	6.38726	13.2856
MPC2.72.2	0.0382272	308.306	51.6625	0.173099	10.6817	1.20033	0.0585273	1.04249	10.6858	1.20063	0.058215	1.11508	576.689	6.62325	-7.5469
MPC2.97.2	0.0133027	464.208	747.494	1.6634	10.9394	0.774283	0.058365	0.877369	10.9408	0.774397	0.0582564	0.898665	563.816	4.18068	-4.72371
MPC2.39.2	0.0913367	197.333	81.9357	0.428917	10.9651	0.933616	0.0586126	1.33008	10.9751	0.935107	0.0578669	1.54043	562.129	5.03385	-7.44366
MPC2.59.2	0.0639219	194.625	237.088	1.25838	10.9846	0.947428	0.0580743	1.36373	10.9917	0.948507	0.0575522	1.51922	561.318	5.09893	-9.88949
MPC2.77.2	0.0613701	606.199	320.34	0.545879	11.3463	0.73747	0.0570117	0.77625	11.3533	0.737896	0.0565106	0.86328	544.173	3.85062	-15.8226
MPC2.46.2	-0.178695	141.1	142.114	1.04043	11.497	1.04406	0.0602063	1.6019	11.4765	1.04786	0.0616554	1.95304	538.567	5.41411	19.4553
MPC2.44.2	0.164522	267.353	103.848	0.40125	11.4933	1.33748	0.0587565	1.15352	11.5122	1.33893	0.0574156	1.47646	536.965	6.89829	-6.04443
MPC2.95.2	4.8965e-11	288.252	269.783	0.966813	11.7134	1.21004	0.0582051	1.06437	11.7134	1.21004	0.0582051	1.06437	528.11	6.13558	1.81744
MPC2.74.2	-0.160178	383.057	161.481	0.435469	11.8163	1.24574	0.0574856	1.01939	11.7974	1.24688	0.0587875	1.23842	524.5	6.28092	6.46684
MPC2.88.2	0.353288	155.333	68.8909	0.458139	11.8882	1.04364	0.0580713	1.6219	11.9304	1.05115	0.0551887	2.5236	518.882	5.24047	-24.5439
MPC2.27.2	-0.0479284	291.565	174.466	0.618122	12.1432	1.42918	0.0571508	1.18004	12.1374	1.42958	0.0575404	1.26548	510.373	7.01486	0.392511
MPC2.86.2	-0.120258	116.043	117.383	1.04493	12.2185	1.14217	0.0580937	1.8691	12.2038	1.14532	0.0590693	2.17524	507.701	5.59173	11.3084
MPC2.57.2	-0.065216	431.235	252.145	0.604	12.2826	0.794628	0.0572232	0.984311	12.2746	0.795296	0.0577529	1.07705	504.885	3.86211	3.10002
MPC2.78.2	0.0297903	196.255	134.24	0.706578	12.2732	0.913305	0.0569235	1.31959	12.2769	0.913791	0.0566811	1.3929	504.795	4.43679	-5.56479
MPC2.98.2	0.0668779	211.309	179.143	0.875754	12.3099	0.944658	0.056195	1.41216	12.3181	0.945842	0.0556504	1.58608	503.17	4.5782	-15.3469
MPC2.67.2	-0.0411088	591.514	366.941	0.640813	12.3772	1.09742	0.057556	0.777584	12.3721	1.09761	0.0578898	0.824764	501.058	5.29137	4.8519
MPC2.80.2	0.0601593	231.135	138.272	0.617972	12.5472	0.914723	0.0576802	1.33981	12.5548	0.915713	0.0571917	1.48102	494.038	4.35496	1.01881
MPC2.47.2	-0.10475	208.806	100.11	0.495264	13.2107	0.951102	0.0570963	1.42634	13.1969	0.953019	0.0579445	1.63827	470.856	4.32738	11.1631
MPC2.40.2	0.159093	245.722	114.656	0.482005	14.0055	0.917036	0.0573398	1.36862	14.0278	0.919801	0.0560517	1.73957	443.905	3.94563	2.39373
MPC2.69.2	-0.0537934	266.272	109.936	0.426496	14.2298	0.87412	0.0555515	1.26698	14.2221	0.874946	0.0559869	1.37138	438.041	3.7053	3.16056
MPC2.45.2	-0.0288748	555.383	54.7099	0.101759	14.2585	0.767624	0.0557299	0.931816	14.2544	0.767895	0.0559636	0.973481	437.082	3.24508	3.17515
MPC2.49.2	0.0233103	338.074	135.726	0.414715	14.2675	0.847224	0.0553093	1.18673	14.2708	0.847545	0.0551205	1.23938	436.595	3.57782	-4.8303
MPC2.48.2	0.224811	429.906	21.1256	0.0507617	14.2549	0.805156	0.0554092	1.05451	14.287	0.80778	0.0535847	1.47137	436.118	3.40635	-24.1229
MPC2.66.2	0.269089	506.621	100.158	0.204221	14.3643	0.779633	0.0557168	0.974579	14.4031	0.782376	0.0535335	1.42066	432.718	3.27435	-23.9
MPC2.60.2	0.0125828	684.15	14.0242	0.0211752	14.4139	0.749521	0.0554901	0.862923	14.4157	0.749627	0.0553882	0.883963	432.35	3.13472	-1.06844
MPC2.50.2	-0.017331	475.913	226.323	0.491249	14.4695	0.794114	0.055976	1.00807	14.467	0.794303	0.0561162	1.03592	430.87	3.31055	5.90378
MPC2.101.2	-0.0480634	362.738	70.3398	0.200313	14.4746	0.851805	0.0570233	1.18169	14.4676	0.852482	0.0574113	1.26667	430.851	3.55288	15.5898
MPC2.89.2	-0.0992952	322.691	182.943	0.585638	14.4862	0.858017	0.0545866	1.21955	14.4718	0.859449	0.0553902	1.40244	430.73	3.58094	-0.65751
MPC2.51.2	0.133649	373.43	239.547	0.662646	14.4678	0.836202	0.0548736	1.16742	14.4871	0.837985	0.0537898	1.44936	430.289	3.48805	-19.4146
MPC2.61.2	0.0574662	305.142	124.779	0.422416	14.5073	0.887195	0.0560354	1.29914	14.5156	0.888127	0.0555705	1.43824	429.472	3.68997	1.37158
MPC2.68.2	0.0257857	523.212	175.759	0.347008	14.5124	1.1209	0.0554858	0.88803	14.5161	1.12105	0.0552771	0.930746	429.459	4.65759	-1.4676
MPC2.54.2	-0.0197689	429.964	391.923	0.941605	14.5635	0.815372	0.0567377	1.0852	14.5606	0.815612	0.0568974	1.11772	428.188	3.37889	12.5853
MPC2.73.2	-0.166073	150.448	64.7729	0.444742	14.5936	1.0833	0.0561315	1.80518	14.5694	1.08752	0.0574718	2.2148	427.94	4.50284	16.5751
MPC2.58.2	-0.140793	90.0567	43.7022	0.501288	14.6244	1.17788	0.0567307	2.06622	14.6039	1.18206	0.0578663	2.45201	426.961	4.88345	19.2505
MPC2.102.2	-0.0301468	289.142	101.307	0.361932	14.637	1.26671	0.0557868	2.25782	14.6326	1.26707	0.0560305	2.289	426.151	5.22503	6.24814
MPC2.75.2	0.456537	181.893	70.3622	0.399598	14.5835	0.958244	0.0557005	1.50963	14.6504	0.96735	0.0519917	2.63075	425.649	3.98452	-50.9796
MPC2.100.2	0.226429	164.043	39.5091	0.248794	14.7913	1.086	0.053806	1.86423	14.8249	1.09192	0.0519673	2.62434	420.799	4.44803	-49.7795

## Sheet: PlotDat2
Source sheet	MPC2	14.0278	0.0560517	13.4	0.0562937	15.6212	0.0547005	14.2233	0.0560517	14.4107	0.0559869	14.4202	0.0559636	14.4541	0.0551205	14.4618	0.0535847	14.5738	0.0535335	14.5795	0.0553882	14.641	0.0561162	14.6545	0.0574113	14.6602	0.0553902	14.6711	0.0537898	14.7109	0.0555705	14.7626	0.0552771	14.7405	0.0568974	14.8094	0.0574718	14.8654	0.0578663	14.9135	0.0560305	14.8651	0.0519917	15.0701	0.0519673
Plot name	Concordia1	14.2221	0.0559869	13.4	0.0562937	15.4223	0.0548227	14.2206	0.0562948	14.4081	0.0561783	14.4166	0.0561352	14.4516	0.0552909	14.4594	0.0537814	14.5715	0.0537232	14.5759	0.0555425	14.6372	0.0562993	14.6519	0.0575927	14.6577	0.0555839	14.6686	0.0539842	14.7083	0.0557698	14.7573	0.0554391	14.7381	0.057056	14.8071	0.0577402	14.8629	0.0581655	14.9107	0.0563009	14.8622	0.0523328	15.0677	0.0522548
Plot Type	1	14.2544	0.0559636	13.4658	0.0562382	15.2283	0.0549454	14.2127	0.0565313	14.4004	0.0563645	14.4059	0.0562993	14.4441	0.0554566	14.4523	0.0539726	14.5646	0.0539076	14.5653	0.0556899	14.626	0.0564744	14.6443	0.0577691	14.65	0.0557723	14.6611	0.0541733	14.7004	0.0559636	14.7413	0.0555941	14.7308	0.0572102	14.8001	0.0580033	14.8553	0.0584589	14.9026	0.056566	14.8535	0.0526645	15.0606	0.0525368
1st free col	47	14.2708	0.0551205	13.5322	0.0561827	15.0389	0.0550684	14.1997	0.0567547	14.3879	0.0565405	14.3886	0.0564487	14.432	0.0556131	14.4407	0.0541532	14.5532	0.0540819	14.5482	0.0558242	14.6078	0.0566338	14.6319	0.0579357	14.6375	0.0559503	14.6489	0.0543519	14.6874	0.0561468	14.7156	0.0557352	14.7189	0.0573559	14.7886	0.0582562	14.8428	0.0587407	14.8892	0.0568208	14.8393	0.0529779	15.0489	0.0528077
Sigma Level	1	14.287	0.0535847	13.5993	0.0561273	14.854	0.0551918	14.1821	0.056959	14.3709	0.0567013	14.3654	0.056577	14.4154	0.0557562	14.425	0.0543184	14.5378	0.0542412	14.5253	0.0559395	14.5834	0.0567706	14.6151	0.058088	14.6205	0.0561131	14.6323	0.0545152	14.6698	0.0563142	14.6811	0.0558563	14.7026	0.0574892	14.7729	0.0584937	14.8257	0.0590055	14.8708	0.0570601	14.8199	0.0532644	15.0329	0.0530622
Absolute Errs	FALSE	14.4031	0.0535335	13.667	0.056072	14.6735	0.0553156	14.1602	0.0571385	14.3498	0.0568426	14.3373	0.0566784	14.3949	0.055882	14.4054	0.0544635	14.5187	0.0543812	14.4976	0.0560306	14.554	0.0568789	14.5942	0.0582219	14.5994	0.0562561	14.6117	0.0546587	14.6479	0.0564613	14.6394	0.0559521	14.6825	0.0576062	14.7532	0.0587114	14.8042	0.0592481	14.8477	0.0572794	14.7958	0.0535162	15.0127	0.0532954
Symbol Type	1	14.4157	0.0553882	13.7353	0.0560167	14.4972	0.0554397	14.1347	0.0572883	14.3252	0.0569606	14.3057	0.0567486	14.3711	0.055987	14.3826	0.0545847	14.4965	0.0544981	14.4663	0.0560937	14.5208	0.0569537	14.5698	0.0583337	14.5749	0.0563754	14.5877	0.0547785	14.6225	0.0565841	14.5923	0.0560184	14.659	0.057704	14.73	0.0589049	14.7789	0.0594638	14.8205	0.0574744	14.7679	0.0537264	14.989	0.0535027
Inverse Plot	TRUE	14.467	0.0561162	13.8044	0.0559616	14.325	0.0555643	14.1063	0.0574045	14.2979	0.0570521	14.2717	0.0567844	14.3444	0.0560683	14.3572	0.0546786	14.4717	0.0545887	14.4329	0.0561259	14.4852	0.056992	14.5427	0.0584203	14.5475	0.056468	14.561	0.0548714	14.5941	0.0566793	14.5419	0.0560522	14.6329	0.0577797	14.7036	0.0590705	14.7501	0.0596484	14.7896	0.0576413	14.7367	0.0538893	14.962	0.0536802
Color Plot	TRUE	14.4676	0.0574113	13.874	0.0559065	14.1566	0.0556892	14.0758	0.0574837	14.2684	0.0571145	14.2371	0.0567844	14.3158	0.0561238	14.3299	0.0547427	14.445	0.0546505	14.3986	0.0561259	14.4488	0.056992	14.5135	0.0584793	14.5181	0.0565311	14.5323	0.0549347	14.5636	0.0567442	14.4903	0.0560522	14.6048	0.0578314	14.6746	0.059205	14.7185	0.0597984	14.7557	0.0577768	14.7031	0.0540004	14.9324	0.0538243
3D plot	FALSE	14.4718	0.0553902	13.9444	0.0558515	13.9921	0.0558146	14.044	0.0575238	14.2377	0.0571461	14.2032	0.0567486	14.286	0.0561519	14.3014	0.0547751	14.4172	0.0546818	14.3652	0.0560937	14.4132	0.0569537	14.483	0.0585093	14.4874	0.0565631	14.5023	0.0549668	14.5318	0.0567772	14.4399	0.0560184	14.5755	0.0578576	14.6435	0.0593058	14.6847	0.0599107	14.7194	0.0578784	14.6682	0.0540568	14.9007	0.0539323
Linear	FALSE	14.4871	0.0537898	14.0155	0.0557965	13.8312	0.0559403	14.0117	0.0575238	14.2066	0.0571461	14.1715	0.0566784	14.2557	0.0561519	14.2725	0.0547751	14.389	0.0546818	14.3339	0.0560306	14.3799	0.0568789	14.4522	0.0585093	14.4563	0.0565631	14.472	0.0549668	14.4995	0.0567772	14.3928	0.0559521	14.5458	0.0578576	14.611	0.0593709	14.6493	0.0599833	14.6813	0.057944	14.6327	0.0540568	14.8675	0.054002
Data Range	BY62:CB80	14.5156	0.0555705	14.0873	0.0557417	13.6738	0.0560664	13.9798	0.0574837	14.1759	0.0571145	14.1435	0.056577	14.2259	0.0561238	14.2441	0.0547427	14.3612	0.0546505	14.3062	0.0559395	14.3505	0.0567706	14.4217	0.0584793	14.4256	0.0565311	14.442	0.0549347	14.4677	0.0567442	14.3511	0.0558563	14.5165	0.0578314	14.5777	0.059399	14.613	0.0600146	14.6424	0.0579723	14.5977	0.0540004	14.8334	0.0540322
Filled Symbols	FALSE	14.5161	0.0552771	14.1598	0.0556869	13.5199	0.0561929	13.9493	0.0574045	14.1464	0.0570521	14.1203	0.0564487	14.1972	0.0560683	14.2167	0.0546786	14.3345	0.0545887	14.2833	0.0558242	14.3261	0.0566338	14.3925	0.0584203	14.3961	0.056468	14.4133	0.0548714	14.4372	0.0566793	14.3167	0.0557352	14.4884	0.0577797	14.5443	0.0593896	14.5765	0.0600042	14.6032	0.0579628	14.5642	0.0538893	14.7992	0.0540221
ConcAge	FALSE	14.5606	0.0568974	14.233	0.0556322	IsoLine	IsoLine	13.9209	0.0572883	14.119	0.0569606	14.1029	0.0562993	14.1706	0.055987	14.1914	0.0545847	14.3097	0.0544981	14.2662	0.0556899	14.3079	0.0564744	14.3654	0.0583337	14.3687	0.0563754	14.3866	0.0547785	14.4088	0.0565841	14.2909	0.0555941	14.4622	0.057704	14.5113	0.0593429	14.5406	0.0599521	14.5646	0.0579158	14.533	0.0537264	14.7656	0.0539721
ConcSwap	FALSE	14.5694	0.0574718	14.3069	0.0555775			13.8954	0.0571385	14.0945	0.0568426	14.0922	0.0561352	14.1467	0.055882	14.1686	0.0544635	14.2875	0.0543812	14.2556	0.0555425	14.2967	0.0562993	14.3411	0.0582219	14.3442	0.0562561	14.3626	0.0546587	14.3834	0.0564613	14.275	0.0554391	14.4388	0.0576062	14.4794	0.0592598	14.5059	0.0598594	14.5273	0.057832	14.505	0.0535162	14.733	0.053883
1st Symbol-row	1	14.6039	0.0578663	14.3816	0.055523			13.8736	0.056959	14.0734	0.0567013	14.0886	0.0559636	14.1262	0.0557562	14.149	0.0543184	14.2684	0.0542412	14.252	0.0553882	14.2929	0.0561162	14.3202	0.058088	14.3231	0.0561131	14.342	0.0545152	14.3615	0.0563142	14.2696	0.0552771	14.4187	0.0574892	14.4493	0.0591418	14.4731	0.059728	14.4921	0.0577132	14.481	0.0532644	14.7023	0.0537566
		14.6326	0.0560305	14.4571	0.0554685			13.8559	0.0567547	14.0563	0.0565405	14.0922	0.055792	14.1097	0.0556131	14.1332	0.0541532	14.253	0.0540819	14.2556	0.055234	14.2967	0.0559331	14.3033	0.0579357	14.3061	0.0559503	14.3254	0.0543519	14.3439	0.0561468	14.275	0.055115	14.4024	0.0573559	14.4216	0.0589914	14.4429	0.0595603	14.4596	0.0575616	14.4616	0.0529779	14.6739	0.0535954
		14.6504	0.0519917	14.5333	0.0554141			13.8429	0.0565313	14.0438	0.0563645	14.1029	0.0556279	14.0975	0.0554566	14.1216	0.0539726	14.2416	0.0539076	14.2662	0.0550865	14.3079	0.0557579	14.2909	0.0577691	14.2936	0.0557723	14.3132	0.0541733	14.3309	0.0559636	14.2909	0.05496	14.3905	0.0572102	14.3967	0.0588114	14.4158	0.0593596	14.4305	0.0573802	14.4474	0.0526645	14.6485	0.0534026
		14.8249	0.0519673	14.6103	0.0553597			13.835	0.0562948	14.0362	0.0561783	14.1203	0.0554785	14.0901	0.0552909	14.1145	0.0537814	14.2347	0.0537232	14.2833	0.0549522	14.3261	0.0555985	14.2833	0.0575927	14.2859	0.0555839	14.3057	0.0539842	14.323	0.0557698	14.3167	0.0548189	14.3832	0.057056	14.3752	0.0586053	14.3923	0.0591298	14.4053	0.0571725	14.4386	0.0523328	14.6265	0.0531817
		IsoLine	IsoLine	14.6881	0.0553054			13.8323	0.0560517	14.0336	0.0559869	14.1435	0.0553502	14.0876	0.0551205	14.1121	0.0535847	14.2324	0.0535335	14.3062	0.054837	14.3505	0.0554617	14.2808	0.0574113	14.2834	0.0553902	14.3032	0.0537898	14.3203	0.0555705	14.3511	0.0546978	14.3807	0.0568974	14.3574	0.0583771	14.373	0.0588755	14.3846	0.0569427	14.4357	0.0519917	14.6084	0.0529373
				14.7667	0.0552512			13.835	0.0558085	14.0362	0.0557954	14.1715	0.0552488	14.0901	0.0549502	14.1145	0.0533881	14.2347	0.0533439	14.3339	0.0547459	14.3799	0.0553535	14.2833	0.05723	14.2859	0.0551965	14.3057	0.0535954	14.323	0.0553712	14.3928	0.054602	14.3832	0.0567388	14.3438	0.0581314	14.3581	0.0586016	14.3686	0.056695	14.4386	0.0516506	14.5944	0.052674
				14.8461	0.0551971			13.8429	0.055572	14.0438	0.0556092	14.2032	0.0551786	14.0975	0.0547845	14.1216	0.0531969	14.2416	0.0531594	14.3652	0.0546828	14.4132	0.0552786	14.2909	0.0570536	14.2936	0.0550081	14.3132	0.0534063	14.3309	0.0551773	14.4399	0.0545358	14.3905	0.0565846	14.3346	0.0578727	14.3481	0.0583133	14.3578	0.0564344	14.4474	0.0513189	14.585	0.0523969
				14.9264	0.0551431			13.8559	0.0553486	14.0563	0.0554332	14.2371	0.0551428	14.1097	0.0546279	14.1332	0.0530162	14.253	0.0529851	14.3986	0.0546505	14.4488	0.0552403	14.3033	0.056887	14.3061	0.0548301	14.3254	0.0532276	14.3439	0.0549942	14.4903	0.0545019	14.4024	0.0564388	14.3299	0.0576063	14.343	0.0580163	14.3524	0.056166	14.4616	0.0510055	14.5802	0.0521114
				15.0075	0.0550891			13.8736	0.0551444	14.0734	0.0552724	14.2717	0.0551428	14.1262	0.0544848	14.149	0.0528511	14.2684	0.0528258	14.4329	0.0546505	14.4852	0.0552403	14.3202	0.0567346	14.3231	0.0546674	14.342	0.0530643	14.3615	0.0548268	14.5419	0.0545019	14.4187	0.0563056	14.3299	0.0573373	14.343	0.0577164	14.3524	0.0558949	14.481	0.0507189	14.5802	0.0518232
				15.0894	0.0550352			13.8954	0.0549649	14.0945	0.0551311	14.3057	0.0551786	14.1467	0.0543591	14.1686	0.052706	14.2875	0.0526858	14.4663	0.0546828	14.5208	0.0552786	14.3411	0.0566008	14.3442	0.0545244	14.3626	0.0529208	14.3834	0.0546796	14.5923	0.0545358	14.4388	0.0561885	14.3346	0.0570709	14.3481	0.0574194	14.3578	0.0556265	14.505	0.0504672	14.585	0.0515377
				15.1723	0.0549814			13.9209	0.054815	14.119	0.0550131	14.3373	0.0552488	14.1706	0.0542541	14.1914	0.0525848	14.3097	0.052569	14.4976	0.0547459	14.554	0.0553535	14.3654	0.056489	14.3687	0.054405	14.3866	0.052801	14.4088	0.0545568	14.6394	0.054602	14.4622	0.0560908	14.3438	0.0568122	14.3581	0.0571311	14.3686	0.0553659	14.533	0.050257	14.5944	0.0512606
				15.256	0.0549276			13.9493	0.0546989	14.1464	0.0549216	14.3654	0.0553502	14.1972	0.0541727	14.2167	0.0524909	14.3345	0.0524784	14.5253	0.054837	14.5834	0.0554617	14.3925	0.0564024	14.3961	0.0543125	14.4133	0.0527082	14.4372	0.0544616	14.6811	0.0546978	14.4884	0.0560151	14.3574	0.0565665	14.373	0.0568572	14.3846	0.0551183	14.5642	0.0500941	14.6084	0.0509973
				15.3406	0.0548739			13.9798	0.0546197	14.1759	0.0548593	14.3886	0.0554785	14.2259	0.0541172	14.2441	0.0524268	14.3612	0.0524166	14.5482	0.0549522	14.6078	0.0555985	14.4217	0.0563433	14.4256	0.0542494	14.442	0.0526448	14.4677	0.0543967	14.7156	0.0548189	14.5165	0.0559634	14.3752	0.0563383	14.3923	0.0566028	14.4053	0.0548884	14.5977	0.0499829	14.6265	0.0507528
				15.4261	0.0548203			14.0117	0.0545795	14.2066	0.0548276	14.4059	0.0556279	14.2557	0.0540891	14.2725	0.0523944	14.389	0.0523853	14.5653	0.0550865	14.626	0.0557579	14.4522	0.0563134	14.4563	0.0542174	14.472	0.0526127	14.4995	0.0543638	14.7413	0.05496	14.5458	0.0559372	14.3967	0.0561322	14.4158	0.0563731	14.4305	0.0546807	14.6327	0.0499266	14.6485	0.050532
				15.5126	0.0547668			14.044	0.0545795	14.2377	0.0548276	14.4166	0.055792	14.286	0.0540891	14.3014	0.0523944	14.4172	0.0523853	14.5759	0.055234	14.6372	0.0559331	14.483	0.0563134	14.4874	0.0542174	14.5023	0.0526127	14.5318	0.0543638	14.7573	0.055115	14.5755	0.0559372	14.4216	0.0559522	14.4429	0.0561724	14.4596	0.0544993	14.6682	0.0499266	14.6739	0.0503392
				15.6	0.0547133			14.0758	0.0546197	14.2684	0.0548593	14.4202	0.0559636	14.3158	0.0541172	14.3299	0.0524268	14.445	0.0524166	14.5795	0.0553882	14.641	0.0561162	14.5135	0.0563433	14.5181	0.0542494	14.5323	0.0526448	14.5636	0.0543967	14.7626	0.0552771	14.6048	0.0559634	14.4493	0.0558017	14.4731	0.0560047	14.4921	0.0543477	14.7031	0.0499829	14.7023	0.050178
				15.6	0.0547133			14.1063	0.0546989	14.2979	0.0549216			14.3444	0.0541727	14.3572	0.0524909	14.4717	0.0524784					14.5427	0.0564024	14.5475	0.0543125	14.561	0.0527082	14.5941	0.0544616			14.6329	0.0560151	14.4794	0.0556838	14.5059	0.0558733	14.5273	0.0542289	14.7367	0.0500941	14.733	0.0500516
				IsoLine	IsoLine			14.1347	0.054815	14.3252	0.0550131			14.3711	0.0542541	14.3826	0.0525848	14.4965	0.052569					14.5698	0.056489	14.5749	0.054405	14.5877	0.052801	14.6225	0.0545568			14.659	0.0560908	14.5113	0.0556007	14.5406	0.0557806	14.5646	0.0541451	14.7679	0.050257	14.7656	0.0499625
								14.1602	0.0549649	14.3498	0.0551311			14.3949	0.0543591	14.4054	0.052706	14.5187	0.0526858					14.5942	0.0566008	14.5994	0.0545244	14.6117	0.0529208	14.6479	0.0546796			14.6825	0.0561885	14.5443	0.055554	14.5765	0.0557285	14.6032	0.0540981	14.7958	0.0504672	14.7992	0.0499125
								14.1821	0.0551444	14.3709	0.0552724			14.4154	0.0544848	14.425	0.0528511	14.5378	0.0528258					14.6151	0.0567346	14.6205	0.0546674	14.6323	0.0530643	14.6698	0.0548268			14.7026	0.0563056	14.5777	0.0555446	14.613	0.0557181	14.6424	0.0540886	14.8199	0.0507189	14.8334	0.0499024
								14.1997	0.0553486	14.3879	0.0554332			14.432	0.0546279	14.4407	0.0530162	14.5532	0.0529851					14.6319	0.056887	14.6375	0.0548301	14.6489	0.0532276	14.6874	0.0549942			14.7189	0.0564388	14.611	0.0555727	14.6493	0.0557494	14.6813	0.0541169	14.8393	0.0510055	14.8675	0.0499325
								14.2127	0.055572	14.4004	0.0556092			14.4441	0.0547845	14.4523	0.0531969	14.5646	0.0531594					14.6443	0.0570536	14.65	0.0550081	14.6611	0.0534063	14.7004	0.0551773			14.7308	0.0565846	14.6435	0.0556378	14.6847	0.055822	14.7194	0.0541825	14.8535	0.0513189	14.9007	0.0500023
								14.2206	0.0558085	14.4081	0.0557954			14.4516	0.0549502	14.4594	0.0533881	14.5715	0.0533439					14.6519	0.05723	14.6577	0.0551965	14.6686	0.0535954	14.7083	0.0553712			14.7381	0.0567388	14.6746	0.0557386	14.7185	0.0559343	14.7557	0.0542841	14.8622	0.0516506	14.9324	0.0501103
								14.2233	0.0560517	14.4107	0.0559869			14.4541	0.0551205	14.4618	0.0535847	14.5738	0.0535335					14.6545	0.0574113	14.6602	0.0553902	14.6711	0.0537898	14.7109	0.0555705			14.7405	0.0568974	14.7036	0.0558731	14.7501	0.0560842	14.7896	0.0544196	14.8651	0.0519917	14.962	0.0502544
																																				14.73	0.0560387	14.7789	0.0562689	14.8205	0.0545865			14.989	0.0504318
																																				14.7532	0.0562322	14.8042	0.0564846	14.8477	0.0547815			15.0127	0.0506392
																																				14.7729	0.0564499	14.8257	0.0567272	14.8708	0.0550008			15.0329	0.0508724
																																				14.7886	0.0566874	14.8428	0.056992	14.8892	0.0552402			15.0489	0.0511269
																																				14.8001	0.0569403	14.8553	0.0572738	14.9026	0.0554949			15.0606	0.0513978
																																				14.8071	0.0572034	14.8629	0.0575672	14.9107	0.05576			15.0677	0.0516797
																																				14.8094	0.0574718	14.8654	0.0578663	14.9135	0.0560305			15.0701	0.0519673

## Sheet: PlotDat3
Source sheet	MPC2	14.0055	0.0573398	13.4	0.0562937	15.2283	0.0549454	14.2001	0.0573398	14.4182	0.0555515	14.4243	0.0557299	14.4506	0.0553093	14.4287	0.0554092	14.534	0.0557168	14.5776	0.0554901	14.6435	0.055976	14.6614	0.0570233	14.6745	0.0545866	14.6511	0.0548736	14.7023	0.0560354	14.7588	0.0554858	14.7434	0.0567377	14.8331	0.0561315	14.8854	0.0567307	14.9179	0.0557868	14.7953	0.0557005	15.0347	0.053806
Plot name	Concordia2	14.2298	0.0555515	13.4	0.0562937	15.0389	0.0550684	14.1974	0.0575354	14.4157	0.055727	14.4221	0.0558594	14.4481	0.055473	14.4264	0.0555549	14.5317	0.0558522	14.5754	0.0556095	14.6412	0.0561167	14.6588	0.0571913	14.6719	0.0547526	14.6486	0.0550333	14.6996	0.0562169	14.7554	0.0556086	14.741	0.0568913	14.8307	0.0563451	14.8829	0.0569778	14.9151	0.0560523	14.7932	0.0558778	15.0323	0.0540175
Plot Type	1	14.2585	0.0557299	13.4605	0.0562426	14.854	0.0551918	14.1895	0.0577258	14.408	0.0558977	14.4154	0.0559854	14.4407	0.0556322	14.4193	0.0556966	14.5248	0.0559839	14.5687	0.0557256	14.6341	0.0562536	14.6512	0.0573548	14.6643	0.054914	14.6411	0.0551887	14.6917	0.0563935	14.7455	0.0557281	14.7337	0.0570406	14.8238	0.0565546	14.8753	0.0572202	14.907	0.0563127	14.7871	0.0560517	15.0252	0.0542249
1st free col	47	14.2675	0.0553093	13.5216	0.0561915	14.6735	0.0553156	14.1766	0.0579056	14.3955	0.056059	14.4044	0.0561044	14.4286	0.0557826	14.4078	0.0558305	14.5136	0.0561083	14.5579	0.0558354	14.6226	0.0563829	14.6388	0.0575092	14.6518	0.0550666	14.629	0.0553355	14.6788	0.0565603	14.7291	0.055841	14.7217	0.0571817	14.8124	0.0567558	14.8629	0.057453	14.8936	0.0565629	14.7769	0.0562187	15.0136	0.0544241
Sigma Level	1	14.2549	0.0554092	13.5832	0.0561405	14.4972	0.0554397	14.159	0.05807	14.3785	0.0562064	14.3894	0.0562132	14.412	0.0559201	14.3921	0.0559529	14.4982	0.0562221	14.5431	0.0559357	14.6068	0.0565011	14.622	0.0576503	14.6348	0.055206	14.6124	0.0554697	14.6612	0.0567128	14.7068	0.0559443	14.7055	0.0573107	14.7967	0.0569449	14.8458	0.0576718	14.8752	0.056798	14.7631	0.0563756	14.9977	0.0546113
Absolute Errs	FALSE	14.3643	0.0557168	13.6454	0.0560896	14.325	0.0555643	14.1373	0.0582145	14.3574	0.056336	14.3708	0.0563088	14.3915	0.0560409	14.3726	0.0560604	14.4792	0.056322	14.5248	0.0560238	14.5874	0.056605	14.6011	0.0577744	14.6137	0.0553286	14.5919	0.0555876	14.6394	0.0568468	14.6793	0.056035	14.6854	0.057424	14.777	0.0571182	14.8244	0.0578722	14.8522	0.0570133	14.7457	0.0565194	14.9777	0.0547828
Symbol Type	1	14.4139	0.0554901	13.7081	0.0560387	14.1566	0.0556892	14.1119	0.0583351	14.3329	0.0564442	14.3492	0.0563886	14.3677	0.0561418	14.35	0.0561502	14.4571	0.0564055	14.5035	0.0560974	14.5647	0.0566917	14.5767	0.0578779	14.5892	0.0554309	14.568	0.055686	14.6139	0.0569587	14.6472	0.0561107	14.6619	0.0575186	14.7538	0.0572723	14.7991	0.0580504	14.8249	0.0572048	14.7252	0.0566472	14.9542	0.0549354
Inverse Plot	TRUE	14.4695	0.055976	13.7714	0.0559879	13.9921	0.0558146	14.0837	0.0584285	14.3055	0.056528	14.3251	0.0564504	14.3411	0.05622	14.3247	0.0562198	14.4325	0.0564701	14.4797	0.0561544	14.5394	0.0567589	14.5496	0.0579582	14.5618	0.0555102	14.5414	0.0557623	14.5856	0.0570454	14.6114	0.0561694	14.6358	0.057592	14.7275	0.0574041	14.7704	0.0582029	14.794	0.0573687	14.7019	0.0567567	14.9274	0.0550659
Color Plot	TRUE	14.4746	0.0570233	13.8352	0.0559371	13.8312	0.0559403	14.0533	0.0584923	14.276	0.0565852	14.2992	0.0564926	14.3125	0.0562733	14.2975	0.0562673	14.406	0.0565143	14.4541	0.0561933	14.5122	0.0568047	14.5204	0.0580129	14.5324	0.0555642	14.5128	0.0558144	14.5552	0.0571045	14.5729	0.0562094	14.6077	0.057642	14.6985	0.0575112	14.7388	0.0583268	14.7601	0.0575019	14.6763	0.0568455	14.898	0.0551719
3D plot	FALSE	14.4862	0.0545866	13.8996	0.0558864	13.6738	0.0560664	14.0216	0.0585246	14.2453	0.0566142	14.2722	0.056514	14.2826	0.0563003	14.2692	0.0562914	14.3783	0.0565366	14.4275	0.056213	14.4838	0.056828	14.49	0.0580407	14.5017	0.0555917	14.4829	0.0558407	14.5234	0.0571345	14.5327	0.0562297	14.5784	0.0576673	14.6676	0.0575914	14.7051	0.0584196	14.7238	0.0576016	14.649	0.0569121	14.8665	0.0552513
Linear	FALSE	14.4678	0.0548736	13.9646	0.0558358	13.5199	0.0561929	13.9894	0.0585246	14.2142	0.0566142	14.2448	0.056514	14.2524	0.0563003	14.2405	0.0562914	14.3503	0.0565366	14.4004	0.056213	14.4551	0.056828	14.4591	0.0580407	14.4706	0.0555917	14.4526	0.0558407	14.4912	0.0571345	14.492	0.0562297	14.5487	0.0576673	14.6351	0.0576432	14.6698	0.0584796	14.6858	0.057666	14.6203	0.0569551	14.8336	0.0553026
Data Range	BU62:BX80	14.5073	0.0560354	14.0302	0.0557853	IsoLine	IsoLine	13.9577	0.0584923	14.1835	0.0565852	14.2178	0.0564926	14.2226	0.0562733	14.2122	0.0562673	14.3227	0.0565143	14.3738	0.0561933	14.4267	0.0568047	14.4287	0.0580129	14.44	0.0555642	14.4228	0.0558144	14.4594	0.0571045	14.4519	0.0562094	14.5193	0.057642	14.6019	0.0576656	14.6336	0.0585055	14.6468	0.0576938	14.5909	0.0569737	14.7998	0.0553248
Filled Symbols	FALSE	14.5124	0.0554858	14.0964	0.0557348			13.9273	0.0584285	14.1541	0.056528	14.1919	0.0564504	14.1939	0.05622	14.185	0.0562198	14.2962	0.0564701	14.3482	0.0561544	14.3995	0.0567589	14.3995	0.0579582	14.4105	0.0555102	14.3942	0.0557623	14.429	0.0570454	14.4134	0.0561694	14.4912	0.057592	14.5685	0.0576582	14.5972	0.0584968	14.6076	0.0576845	14.5614	0.0569675	14.7659	0.0553174
ConcAge	FALSE	14.5635	0.0567377	14.1631	0.0556843			13.8991	0.0583351	14.1267	0.0564442	14.1678	0.0563886	14.1673	0.0561418	14.1598	0.0561502	14.2715	0.0564055	14.3244	0.0560974	14.3743	0.0566917	14.3724	0.0578779	14.3832	0.0554309	14.3675	0.055686	14.4006	0.0569587	14.3776	0.0561107	14.4651	0.0575186	14.5356	0.057621	14.5613	0.0584538	14.569	0.0576383	14.5323	0.0569366	14.7324	0.0552805
ConcSwap	FALSE	14.5936	0.0561315	14.2305	0.055634			13.8737	0.0582145	14.1022	0.056336	14.1462	0.0563088	14.1435	0.0560409	14.1371	0.0560604	14.2494	0.056322	14.3031	0.0560238	14.3516	0.056605	14.3481	0.0577744	14.3586	0.0553286	14.3437	0.0555876	14.3752	0.0568468	14.3455	0.056035	14.4417	0.057424	14.5038	0.0575548	14.5267	0.0583772	14.5318	0.057556	14.5042	0.0568817	14.7002	0.055215
1st Symbol-row	1	14.6244	0.0567307	14.2986	0.0555837			13.8519	0.05807	14.0811	0.0562064	14.1277	0.0562132	14.123	0.0559201	14.1176	0.0559529	14.2305	0.0562221	14.2848	0.0559357	14.3321	0.0565011	14.3272	0.0576503	14.3376	0.055206	14.3231	0.0554697	14.3534	0.0567128	14.3179	0.0559443	14.4215	0.0573107	14.4738	0.0574609	14.494	0.0582686	14.4965	0.0574393	14.4777	0.0568038	14.6696	0.0551221
		14.637	0.0557868	14.3672	0.0555334			13.8344	0.0579056	14.0641	0.056059	14.1127	0.0561044	14.1065	0.0557826	14.1019	0.0558305	14.2151	0.0561083	14.27	0.0558354	14.3164	0.0563829	14.3103	0.0575092	14.3206	0.0550666	14.3066	0.0553355	14.3358	0.0565603	14.2956	0.055841	14.4053	0.0571817	14.4461	0.0573411	14.4638	0.0581301	14.464	0.0572905	14.4532	0.0567044	14.6415	0.0550035
		14.5835	0.0557005	14.4365	0.0554833			13.8215	0.0577258	14.0516	0.0558977	14.1017	0.0559854	14.0943	0.0556322	14.0904	0.0556966	14.2039	0.0559839	14.2591	0.0557256	14.3048	0.0562536	14.2979	0.0573548	14.3081	0.054914	14.2944	0.0551887	14.3229	0.0563935	14.2793	0.0557281	14.3934	0.0570406	14.4213	0.0571978	14.4367	0.0579643	14.4349	0.0571123	14.4312	0.0565855	14.6163	0.0548617
		14.7913	0.053806	14.5065	0.0554331			13.8136	0.0575354	14.0439	0.055727	14.095	0.0558594	14.0869	0.055473	14.0834	0.0555549	14.197	0.0558522	14.2525	0.0556095	14.2978	0.0561167	14.2903	0.0571913	14.3004	0.0547526	14.287	0.0550333	14.315	0.0562169	14.2693	0.0556086	14.3861	0.0568913	14.3998	0.0570338	14.4133	0.0577745	14.4097	0.0569084	14.4123	0.0564493	14.5944	0.0546993
		IsoLine	IsoLine	14.5771	0.0553831			13.8109	0.0573398	14.0413	0.0555515	14.0927	0.0557299	14.0844	0.0553093	14.081	0.0554092	14.1947	0.0557168	14.2503	0.0554901	14.2954	0.055976	14.2878	0.0570233	14.2979	0.0545866	14.2845	0.0548736	14.3123	0.0560354	14.2659	0.0554858	14.3836	0.0567377	14.3821	0.0568522	14.394	0.0575644	14.389	0.0566826	14.3966	0.0562986	14.5764	0.0545195
				14.6483	0.0553331			13.8136	0.0571441	14.0439	0.055376	14.095	0.0556004	14.0869	0.0551457	14.0834	0.0552635	14.197	0.0555814	14.2525	0.0553707	14.2978	0.0558353	14.2903	0.0568553	14.3004	0.0544206	14.287	0.0547138	14.315	0.0558539	14.2693	0.0553629	14.3861	0.0565842	14.3685	0.0566565	14.3792	0.0573381	14.373	0.0564394	14.3846	0.0561362	14.5626	0.0543258
				14.7203	0.0552832			13.8215	0.0569537	14.0516	0.0552053	14.1017	0.0554745	14.0943	0.0549865	14.0904	0.0551218	14.2039	0.0554497	14.2591	0.0552545	14.3048	0.0556984	14.2979	0.0566918	14.3081	0.0542591	14.2944	0.0545584	14.3229	0.0556773	14.2793	0.0552434	14.3934	0.0564348	14.3593	0.0564506	14.3692	0.0570999	14.3622	0.0561835	14.3765	0.0559654	14.5533	0.054122
				14.7929	0.0552333			13.8344	0.0567739	14.0641	0.055044	14.1127	0.0553555	14.1065	0.0548361	14.1019	0.0549879	14.2151	0.0553253	14.27	0.0551448	14.3164	0.0555691	14.3103	0.0565374	14.3206	0.0541066	14.3066	0.0544116	14.3358	0.0555105	14.2956	0.0551305	14.4053	0.0562938	14.3546	0.0562386	14.3641	0.0568546	14.3568	0.0559199	14.3723	0.0557894	14.5485	0.053912
				14.8663	0.0551835			13.8519	0.0566095	14.0811	0.0548966	14.1277	0.0552467	14.123	0.0546986	14.1176	0.0548655	14.2305	0.0552115	14.2848	0.0550445	14.3321	0.0554509	14.3272	0.0563963	14.3376	0.0539671	14.3231	0.0542775	14.3534	0.055358	14.3179	0.0550273	14.4215	0.0561648	14.3546	0.0560244	14.3641	0.0566068	14.3568	0.0556536	14.3723	0.0556117	14.5485	0.0537
				14.9403	0.0551338			13.8737	0.056465	14.1022	0.054767	14.1462	0.0551511	14.1435	0.0545777	14.1371	0.0547579	14.2494	0.0551115	14.3031	0.0549564	14.3516	0.0553471	14.3481	0.0562722	14.3586	0.0538446	14.3437	0.0541595	14.3752	0.055224	14.3455	0.0549366	14.4417	0.0560514	14.3593	0.0558123	14.3692	0.0563615	14.3622	0.05539	14.3765	0.0554357	14.5533	0.0534901
				15.0151	0.0550841			13.8991	0.0563444	14.1267	0.0546589	14.1678	0.0550713	14.1673	0.0544769	14.1598	0.0546681	14.2715	0.0550281	14.3244	0.0548828	14.3743	0.0552603	14.3724	0.0561687	14.3832	0.0537423	14.3675	0.0540611	14.4006	0.0551121	14.3776	0.0548608	14.4651	0.0559568	14.3685	0.0556064	14.3792	0.0561233	14.373	0.0551341	14.3846	0.0552648	14.5626	0.0532863
				15.0905	0.0550345			13.9273	0.056251	14.1541	0.054575	14.1919	0.0550095	14.1939	0.0543987	14.185	0.0545985	14.2962	0.0549634	14.3482	0.0548258	14.3995	0.0551931	14.3995	0.0560884	14.4105	0.053663	14.3942	0.0539848	14.429	0.0550254	14.4134	0.0548022	14.4912	0.0558835	14.3821	0.0554108	14.394	0.055897	14.389	0.0548909	14.3966	0.0551025	14.5764	0.0530926
				15.1668	0.0549849			13.9577	0.0561872	14.1835	0.0545179	14.2178	0.0549673	14.2226	0.0543454	14.2122	0.0545511	14.3227	0.0549193	14.3738	0.0547869	14.4267	0.0551473	14.4287	0.0560337	14.44	0.0536089	14.4228	0.0539327	14.4594	0.0549663	14.4519	0.0547621	14.5193	0.0558335	14.3998	0.0552292	14.4133	0.0556869	14.4097	0.0546651	14.4123	0.0549518	14.5944	0.0529128
				15.2438	0.0549354			13.9894	0.0561549	14.2142	0.0544889	14.2448	0.0549459	14.2524	0.0543183	14.2405	0.054527	14.3503	0.054897	14.4004	0.0547671	14.4551	0.0551241	14.4591	0.0560059	14.4706	0.0535815	14.4526	0.0539064	14.4912	0.0549363	14.492	0.0547418	14.5487	0.0558081	14.4213	0.0550651	14.4367	0.0554971	14.4349	0.0544612	14.4312	0.0548156	14.6163	0.0527504
				15.3215	0.054886			14.0216	0.0561549	14.2453	0.0544889	14.2722	0.0549459	14.2826	0.0543183	14.2692	0.054527	14.3783	0.054897	14.4275	0.0547671	14.4838	0.0551241	14.49	0.0560059	14.5017	0.0535815	14.4829	0.0539064	14.5234	0.0549363	14.5327	0.0547418	14.5784	0.0558081	14.4461	0.0549218	14.4638	0.0553313	14.464	0.0542831	14.4532	0.0546967	14.6415	0.0526086
				15.4	0.0548366			14.0533	0.0561872	14.276	0.0545179	14.2992	0.0549673	14.3125	0.0543454	14.2975	0.0545511	14.406	0.0549193	14.4541	0.0547869	14.5122	0.0551473	14.5204	0.0560337	14.5324	0.0536089	14.5128	0.0539327	14.5552	0.0549663	14.5729	0.0547621	14.6077	0.0558335	14.4738	0.054802	14.494	0.0551928	14.4965	0.0541342	14.4777	0.0545973	14.6696	0.05249
				15.4	0.0548366			14.0837	0.056251	14.3055	0.054575	14.3251	0.0550095	14.3411	0.0543987	14.3247	0.0545985	14.4325	0.0549634	14.4797	0.0548258	14.5394	0.0551931	14.5496	0.0560884	14.5618	0.053663	14.5414	0.0539848	14.5856	0.0550254	14.6114	0.0548022	14.6358	0.0558835	14.5038	0.0547081	14.5267	0.0550842	14.5318	0.0540175	14.5042	0.0545194	14.7002	0.0523971
				IsoLine	IsoLine			14.1119	0.0563444	14.3329	0.0546589	14.3492	0.0550713	14.3677	0.0544769	14.35	0.0546681	14.4571	0.0550281	14.5035	0.0548828	14.5647	0.0552603	14.5767	0.0561687	14.5892	0.0537423	14.568	0.0540611	14.6139	0.0551121	14.6472	0.0548608	14.6619	0.0559568	14.5356	0.054642	14.5613	0.0550076	14.569	0.0539352	14.5323	0.0544645	14.7324	0.0523315
								14.1373	0.056465	14.3574	0.054767	14.3708	0.0551511	14.3915	0.0545777	14.3726	0.0547579	14.4792	0.0551115	14.5248	0.0549564	14.5874	0.0553471	14.6011	0.0562722	14.6137	0.0538446	14.5919	0.0541595	14.6394	0.055224	14.6793	0.0549366	14.6854	0.0560514	14.5685	0.0546048	14.5972	0.0549646	14.6076	0.053889	14.5614	0.0544336	14.7659	0.0522947
								14.159	0.0566095	14.3785	0.0548966	14.3894	0.0552467	14.412	0.0546986	14.3921	0.0548655	14.4982	0.0552115	14.5431	0.0550445	14.6068	0.0554509	14.622	0.0563963	14.6348	0.0539671	14.6124	0.0542775	14.6612	0.055358	14.7068	0.0550273	14.7055	0.0561648	14.6019	0.0545973	14.6336	0.0549559	14.6468	0.0538797	14.5909	0.0544274	14.7998	0.0522873
								14.1766	0.0567739	14.3955	0.055044	14.4044	0.0553555	14.4286	0.0548361	14.4078	0.0549879	14.5136	0.0553253	14.5579	0.0551448	14.6226	0.0555691	14.6388	0.0565374	14.6518	0.0541066	14.629	0.0544116	14.6788	0.0555105	14.7291	0.0551305	14.7217	0.0562938	14.6351	0.0546197	14.6698	0.0549818	14.6858	0.0539075	14.6203	0.054446	14.8336	0.0523095
								14.1895	0.0569537	14.408	0.0552053	14.4154	0.0554745	14.4407	0.0549865	14.4193	0.0551218	14.5248	0.0554497	14.5687	0.0552545	14.6341	0.0556984	14.6512	0.0566918	14.6643	0.0542591	14.6411	0.0545584	14.6917	0.0556773	14.7455	0.0552434	14.7337	0.0564348	14.6676	0.0546715	14.7051	0.0550418	14.7238	0.0539719	14.649	0.054489	14.8665	0.0523608
								14.1974	0.0571441	14.4157	0.055376	14.4221	0.0556004	14.4481	0.0551457	14.4264	0.0552635	14.5317	0.0555814	14.5754	0.0553707	14.6412	0.0558353	14.6588	0.0568553	14.6719	0.0544206	14.6486	0.0547138	14.6996	0.0558539	14.7554	0.0553629	14.741	0.0565842	14.6985	0.0547517	14.7388	0.0551346	14.7601	0.0540717	14.6763	0.0545556	14.898	0.0524402
								14.2001	0.0573398	14.4182	0.0555515	14.4243	0.0557299	14.4506	0.0553093	14.4287	0.0554092	14.534	0.0557168	14.5776	0.0554901	14.6435	0.055976	14.6614	0.0570233	14.6745	0.0545866	14.6511	0.0548736	14.7023	0.0560354	14.7588	0.0554858	14.7434	0.0567377	14.7275	0.0548588	14.7704	0.0552585	14.794	0.0542048	14.7019	0.0546444	14.9274	0.0525462
																																				14.7538	0.0549907	14.7991	0.055411	14.8249	0.0543687	14.7252	0.0547538	14.9542	0.0526767
																																				14.777	0.0551447	14.8244	0.0555892	14.8522	0.0545602	14.7457	0.0548817	14.9777	0.0528292
																																				14.7967	0.055318	14.8458	0.0557896	14.8752	0.0547755	14.7631	0.0550255	14.9977	0.0530008
																																				14.8124	0.0555071	14.8629	0.0560084	14.8936	0.0550106	14.7769	0.0551824	15.0136	0.053188
																																				14.8238	0.0557083	14.8753	0.0562412	14.907	0.0552608	14.7871	0.0553494	15.0252	0.0533872
																																				14.8307	0.0559178	14.8829	0.0564836	14.9151	0.0555212	14.7932	0.0555232	15.0323	0.0535946
																																				14.8331	0.0561315	14.8854	0.0567307	14.9179	0.0557868	14.7953	0.0557005	15.0347	0.053806

## Sheet: MPU cores table
Spot Name	4-corr %com 206Pb	ppm U	ppm Th	232Th/ 238U	total 238U /206Pb*	% err	total 207Pb* /206Pb*	% err	4corr 238U /206Pb*	% err	204Pb corr 207Pb* /206Pb*	% err	204Pb corr 206Pb /238U Age, Ma	1σ err, Ma	% Dis- cor- dant
MPU2.78.2	0.0134618	142.595	44.4253	0.321831	1.54937	2.22977	0.264624	0.364319	1.54958	2.22978	0.264507	0.365415	3209.96	56.3782	2.47297
MPU2.95.2	-0.0138961	175.079	125.782	0.742136	2.10633	18.5227	0.120977	13.7872	2.10604	18.5227	0.121107	13.7707	2504.69	384.428	-32.6397
MPU2.103.2	0.00556601	185.967	88.6108	0.49221	2.22544	0.8397	0.186802	1.1205	2.22556	0.839719	0.186754	1.12114	2392.25	16.7821	14.1604
MPU2.53.2	0.0185997	247.493	40.4552	0.168855	2.40232	6.70864	0.15722	8.36635	2.40277	6.70865	0.157058	8.37669	2243.14	127.093	8.83745
MPU2.45.2	9.93795e-12	264.696	148.644	0.580097	2.7945	0.746415	0.120479	0.38802	2.7945	0.746415	0.120479	0.38802	1971.95	12.6807	-0.510117
MPU2.49.2	-0.0131337	617.543	348.266	0.582566	2.87554	0.844305	0.122572	0.44368	2.87516	0.844322	0.122686	0.444841	1924.12	14.0455	4.14491
MPU2.104.2	-0.00713426	225.838	112.091	0.512712	3.17192	1.40767	0.171211	1.8289	3.17169	1.40769	0.171269	1.82846	1766.68	21.7527	35.6372
MPU2.90.2	0.0332487	178.552	142.905	0.826764	3.2028	5.32938	0.106438	5.11787	3.20387	5.32941	0.106148	5.13535	1751.14	81.7237	-1.11016
MPU2.105.2	0.0279915	253.492	139.366	0.567927	3.33938	1.70555	0.171529	2.64435	3.34031	1.70561	0.171306	2.64935	1688.2	25.3324	38.8967
MPU2.42.2	0.021564	156.33	166.909	1.1029	3.49196	6.15734	0.0932507	9.17982	3.49272	6.15736	0.0930628	9.20145	1623.06	88.3494	-10.1753
MPU2.46.2	0.0433469	304.695	192.757	0.6535	3.50632	1.1627	0.101965	0.443074	3.50784	1.16279	0.101591	0.461508	1616.87	16.6284	2.49686
MPU2.86.2	0.970205	325.593	194.035	0.615609	4.79294	2.34637	0.0861112	1.38067	4.83989	2.34836	0.0778763	1.86796	1210.76	25.9226	-6.43082
MPU2.58.2	1.88735e-10	248.685	119.491	0.496347	4.96847	2.28904	0.0789182	0.759722	4.96847	2.28904	0.0789182	0.759722	1182.13	24.7234	-1.12727
MPU2.64.2	2.124	231.195	142.668	0.637453	5.03606	1.20698	0.108435	3.16927	5.14535	1.33331	0.0908025	6.4633	1144.9	13.9863	22.4997
MPU2.75.2	-0.0221187	299.164	106.818	0.368838	5.21128	1.17411	0.075731	0.601546	5.21013	1.17418	0.0759176	0.616493	1131.84	12.1886	-3.88563
MPU2.63.2	0.0310245	170.794	182.821	1.10575	5.24731	1.90655	0.076439	0.874872	5.24894	1.90668	0.0761775	0.911107	1124.16	19.6694	-2.42025
MPU2.100.2	0.0272977	307.071	153.822	0.517465	5.27427	0.786515	0.0763178	0.662071	5.27571	0.786673	0.0760877	0.686814	1118.93	8.08071	-2.13887
MPU2.32.2	0.189847	374.57	256.692	0.707912	5.51604	0.759245	0.0770862	1.3979	5.52653	0.760219	0.0754929	1.4927	1072.14	7.50887	0.955137
MPU2.3.2	-0.0668957	183.348	22.535	0.126964	5.56005	0.890133	0.0790365	1.64459	5.55634	0.89076	0.0795949	1.66918	1066.84	8.75826	10.9786
MPU2.98.2	-0.174109	153.486	92.9314	0.625452	5.58076	1.76103	0.0752866	0.990608	5.57106	1.76198	0.0767444	1.15789	1064.24	17.2856	4.89703
MPU2.94.2	0.0564294	279.215	151.056	0.558856	5.61727	0.810592	0.0763418	0.741532	5.62044	0.810985	0.0758692	0.796906	1055.61	7.89668	3.57584
MPU2.40.2	0.0561085	457.808	228.398	0.515358	5.6565	0.73642	0.0750106	0.570326	5.65967	0.736658	0.0745402	0.611593	1048.86	7.13068	0.746047
MPU2.84.2	0.0442993	1346.27	568.954	0.43656	5.77525	0.659539	0.0745574	0.328717	5.77781	0.659614	0.0741867	0.349003	1029.04	6.27362	1.81059
MPU2.102.2	0.0316291	417.735	121.461	0.300355	5.83171	1.26022	0.0746892	1.24016	5.83355	1.26032	0.0744248	1.25758	1019.94	11.8892	3.39491
MPU2.55.2	0.0332225	184.224	76.755	0.430389	5.8393	0.881783	0.0716924	0.916659	5.84124	0.882097	0.0714137	0.961037	1018.7	8.31188	-5.51284
MPU2.37.2	0.0599416	606.868	5.1332	0.00873765	5.85682	3.87671	0.0692991	2.55243	5.86033	3.87675	0.0687949	2.58138	1015.63	36.4285	-14.9018
MPU2.73.2	0.0854571	344.051	239.223	0.71826	6.22039	0.759761	0.0801092	0.623785	6.22571	0.760242	0.0794033	0.689857	960.246	6.7825	20.1995
MPU2.101.2	0.444743	787.324	162.717	0.213492	6.36747	1.07047	0.0773572	0.463521	6.39592	1.07466	0.0736667	1.17423	936.459	9.3669	9.97798
MPU2.22.2	16.3752	402.88	233.892	0.599708	5.69162	0.75123	0.210849	2.07806	6.80615	1.04127	0.0760616	10.4085	883.709	8.59896	20.7742
MPU2.82.2	0.0486777	514.912	36.7482	0.0737231	7.43303	3.11758	0.0658282	2.15579	7.43665	3.11764	0.0654251	2.18467	813.31	23.8218	-3.41396
MPU2.10.2	0.031335	364.207	133.091	0.377486	7.58783	1.94957	0.0668169	3.58374	7.59021	1.94965	0.0665581	3.6058	797.833	14.6309	3.37317
MPU2.77.2	0.0342379	658.326	3.18156	0.00499229	7.59879	4.13583	0.0666801	2.8358	7.60139	4.13585	0.0663973	2.8534	796.729	30.9966	2.88128
MPU2.25.2	0.0264915	360.69	76.9663	0.220428	8.453	0.798736	0.0723357	4.0643	8.45524	0.798956	0.07212	4.08302	720.597	5.44714	28.6982
MPU2.44.2	0.0630621	527.315	91.8183	0.17987	8.86025	0.739826	0.0621925	0.70595	8.86584	0.740211	0.061674	0.780077	688.945	4.83659	-4.15516
MPU2.41.2	0.0502584	401.682	143.456	0.368922	9.21502	4.41886	0.0550162	2.94274	9.21965	4.41893	0.0546004	2.99101	663.821	27.874	-71.2457
MPU2.52.2	0.0101669	557.943	41.7453	0.077289	9.84036	1.14809	0.0594379	1.43494	9.84136	1.14814	0.0593545	1.44394	623.849	6.82698	-7.90798
MPU2.88.2	0.0331805	627.13	325.615	0.536349	9.86386	0.723774	0.0603951	0.686581	9.86713	0.723964	0.0601235	0.72598	622.296	4.29458	-2.4627
MPU2.67.2	0.140135	366.13	268.692	0.75809	10.0249	3.83152	0.0587822	3.50286	10.039	3.83178	0.0576326	3.6331	612.135	22.3764	-19.5748
MPU2.70.2	0.025502	222.492	138.363	0.642401	10.1298	1.42526	0.061711	1.18682	10.1324	1.42549	0.0615029	1.2383	606.748	8.25454	7.99438
MPU2.85.2	-0.10612	277.463	640.957	2.38629	10.2487	0.85768	0.060244	1.09198	10.2379	0.858989	0.06111	1.2479	600.778	4.92744	6.89327
MPU2.66.2	0.0762354	198.166	277.323	1.44563	10.2552	1.22278	0.059468	1.19932	10.263	1.22357	0.0588442	1.35883	599.371	7.00311	-7.09577
MPU2.59.2	-9.42233e-11	475.411	374.033	0.812721	10.3435	0.768338	0.0587765	0.845905	10.3435	0.768338	0.0587765	0.845905	594.919	4.36641	-6.76123
MPU2.89.2	-0.0416617	382.673	71.7539	0.193695	10.3628	0.78572	0.0598351	2.05213	10.3585	0.786088	0.0601753	2.0656	594.095	4.46137	2.7099
MPU2.93.2	-0.0697251	175.981	475.723	2.79248	10.391	0.988331	0.0595811	2.56058	10.3838	0.989559	0.0601503	2.62132	592.712	5.60367	2.79721
MPU2.99.2	-0.0933303	249.581	132.132	0.546885	10.4061	0.880673	0.0600968	1.1528	10.3964	0.881907	0.0608581	1.29769	592.027	4.98855	6.96277
MPU2.65.2	0.0938501	128.664	297.3	2.38692	10.4752	1.15254	0.0582603	1.65973	10.485	1.15445	0.057492	1.93103	587.242	6.4798	-15.74
MPU2.48.2	-0.117596	145.707	210.409	1.49171	10.539	1.01799	0.0605657	1.48089	10.5266	1.02025	0.0615236	1.71066	585.023	5.70587	11.5425
MPU2.57.2	0.100655	120.197	130.275	1.11961	10.5514	1.10223	0.0597501	1.68366	10.562	1.10453	0.0589278	1.9738	583.148	6.15833	-3.46893
MPU2.61.2	0.230361	162.38	111.395	0.708652	10.5404	1.5399	0.0578752	2.27602	10.5647	1.54237	0.0559865	2.68231	583.007	8.59747	-30.3685
MPU2.79.2	3.09923e-11	447.261	315.983	0.729797	10.6626	1.04813	0.0598336	0.838092	10.6626	1.04813	0.0598336	0.838092	577.887	5.79348	3.44203
MPU2.43.2	0.112455	591.024	321.639	0.562165	10.6661	0.878854	0.0597179	0.725955	10.6782	0.879455	0.0587995	0.865198	577.083	4.85465	-3.25048
MPU2.19.2	-0.0404166	321.334	38.9377	0.125174	10.7325	0.844832	0.0581245	1.07954	10.7281	0.845315	0.0584546	1.14485	574.511	4.64631	-5.28834
MPU2.31.2	-0.417072	124.221	67.1188	0.558148	10.9247	1.10631	0.0599609	1.71307	10.8793	1.11602	0.0633447	2.47914	566.867	6.05617	22.1932
MPU2.11.2	0.375583	104.211	200.568	1.98814	10.8737	1.18011	0.0613243	3.32817	10.9147	1.1901	0.0582585	4.12523	565.107	6.439	-4.95797
MPU2.76.2	-1.02791e-09	179.185	174.415	1.0055	10.9451	1.22508	0.0585155	2.67928	10.9451	1.22508	0.0585155	2.67928	563.607	6.61143	-2.75557
MPU2.71.2	0.0543695	540.373	674.824	1.29002	10.9958	0.747021	0.0581965	0.787728	11.0018	0.747417	0.0577526	0.865488	560.824	4.01453	-8.11299
MPU2.36.2	0.104439	162.329	98.6661	0.627874	10.9929	0.971005	0.0582111	1.42383	11.0044	0.972879	0.057358	1.68268	560.696	5.2244	-11.4421
MPU2.72.2	-2.33515e-10	174.016	251.169	1.491	11.0252	0.936169	0.0613139	1.31796	11.0252	0.936169	0.0613139	1.31796	559.682	5.01856	14.5421
MPU2.92.2	0.0503763	764.675	15.2518	0.0206036	11.0268	1.15021	0.0613966	1.48485	11.0324	1.15037	0.060987	1.51699	559.333	6.16316	12.9828
MPU2.56.2	-7.5827e-11	621.177	129.037	0.214584	11.092	0.880482	0.0591462	0.756723	11.092	0.880482	0.0591462	0.756723	556.453	4.69397	2.92209
MPU2.69.2	0.466569	186.838	228.861	1.26534	11.1037	0.955829	0.0579951	1.40096	11.1557	0.964007	0.0541716	2.42151	553.408	5.11231	-48.3572
MPU2.60.2	0.00714345	755.08	54.6275	0.074734	11.994	0.927928	0.0572922	0.647695	11.9949	0.927955	0.057234	0.656306	516.2	4.60334	-3.25085
MPU2.50.2	0.226976	148.035	209.961	1.46513	12.0052	1.04083	0.0581064	1.62447	12.0325	1.04579	0.0562576	2.23569	514.647	5.1729	-11.7197
MPU2.80.2	0.143424	248.035	84.4028	0.351516	12.1774	0.905711	0.0585816	1.28034	12.1949	0.907986	0.0574157	1.5933	508.058	4.43599	-0.106995
MPU2.39.2	0.0253805	516.974	273.063	0.545624	12.2385	0.759436	0.0571776	0.862486	12.2416	0.759648	0.0569712	0.902953	506.196	3.69821	-3.34519
MPU2.83.2	0.115288	459.599	279.979	0.629284	12.2843	1.00173	0.0575548	0.929623	12.2985	1.00256	0.0566171	1.11305	503.943	4.85991	-5.95316
MPU2.81.2	-0.0597031	118.989	218.584	1.89763	12.3437	1.13054	0.0562042	1.87682	12.3363	1.13211	0.0566897	2.04717	502.456	5.47231	-4.98026
MPU2.91.2	0.327644	147.882	113.786	0.794831	12.3246	1.0489	0.0577652	1.65269	12.3651	1.05624	0.0550958	2.52958	501.332	5.09459	-21.2885
MPU2.68.2	0.0841798	241.251	130.783	0.559993	12.5056	0.898835	0.0582058	1.27107	12.5161	0.90015	0.0575224	1.45891	495.507	4.29319	3.27132
MPU2.97.2	0.228038	259.749	173.599	0.690389	12.5501	1.31397	0.0581195	1.20922	12.5788	1.31618	0.0562656	1.66712	493.131	6.24844	-6.79281
MPU2.87.2	-0.182747	230.919	241.139	1.07872	12.7094	0.92089	0.0581705	1.31718	12.6863	0.923897	0.0596495	1.63248	489.108	4.35168	17.8841
MPU2.96.2	0.208341	232.178	85.7455	0.381496	13.4094	6.39441	0.0680874	14.0443	13.4374	6.39498	0.0664194	14.4636	462.724	28.554	45.1108
MPU2.51.2	-0.049312	331.826	107.56	0.334843	14.3017	0.858389	0.055799	1.21089	14.2947	0.859097	0.0561979	1.30221	435.892	3.62093	5.46176
MPU2.47.2	0.0230597	661.038	68.3001	0.106732	14.3311	0.944964	0.0557925	0.825716	14.3344	0.945105	0.0556058	0.862016	434.724	3.97312	0.459527
MPU2.54.2	-0.0563013	590.765	65.8009	0.115058	14.5482	0.763194	0.0558401	0.914341	14.54	0.763713	0.0562952	0.992386	428.776	3.16809	7.85281
MPU2.62.2	-0.274737	156.905	120.001	0.79004	14.642	1.0105	0.054465	1.66764	14.6019	1.01667	0.0566843	2.25717	427.017	4.2007	11.2679
MPU2.38.2	0.146984	306.36	53.8964	0.181731	14.5905	0.856507	0.0551636	1.22101	14.612	0.858613	0.0539723	1.54157	426.732	3.54534	-15.8806
MPU2.74.2	0.146197	220.716	146.776	0.686943	14.6918	1.48846	0.0543836	1.48824	14.7133	1.49026	0.0531978	1.88872	423.887	6.11382	-26.5474

## Sheet: MPC Table
Spot Name	4-corr %com 206Pb	ppm U	ppm Th	232Th/ 238U	total 238U /206Pb*	% err	total 207Pb* /206Pb*	% err	4corr 238U /206Pb*	% err	204Pb corr 207Pb* /206Pb*	% err	204Pb corr 206Pb /238U Age, Ma	1σ err, Ma	% Dis- cor- dant
MPC.18.1	-0.128004	621.057	76.0255	0.126453	14.6062	0.796156	0.0559857	0.928232	14.5875	0.797296	0.0570193	1.09213	427.425	3.29732	13.6153
MPC.12.1	-0.115251	537.474	66.7672	0.128323	14.0617	0.769587	0.0558621	0.920009	14.0456	0.770663	0.0567943	1.07378	443.362	3.30198	8.60049
MPC.20.1	-0.0616383	399.285	27.7652	0.071832	14.6766	1.10704	0.0557709	1.11302	14.6675	1.10761	0.056269	1.21505	425.169	4.55728	8.44272
MPC.25.1	-0.054006	470.257	63.7217	0.139976	14.5107	0.80033	0.0545278	1.04505	14.5029	0.800937	0.0549651	1.13332	429.838	3.33046	-4.78978
MPC.33.1	-0.0300296	437.426	76.8726	0.181538	14.2301	0.767071	0.0561358	0.937043	14.2258	0.767365	0.0563787	0.981191	437.93	3.24892	6.50354
MPC.30.1	-3.64414e-10	334.848	61.841	0.190778	14.4424	0.853908	0.0556327	1.20531	14.4424	0.853908	0.0556327	1.20531	431.58	3.56464	1.45444
MPC.36.1	-2.3728e-10	322.023	44.4556	0.142607	14.4138	0.847681	0.056286	1.18514	14.4138	0.847681	0.056286	1.18514	432.406	3.54519	6.97087
MPC.10.1	-1.64876e-10	509.909	71.7699	0.145395	14.4274	0.787746	0.0556842	0.995574	14.4274	0.787746	0.0556842	0.995574	432.012	3.29163	1.83064
MPC.13.1	-1.29168e-10	488.749	110.812	0.234207	14.5079	0.792883	0.0559049	1.01249	14.5079	0.792883	0.0559049	1.01249	429.692	3.29589	4.35508
MPC.7.1	3.42228e-11	626.612	13.9756	0.0230395	14.3704	0.760991	0.0554083	0.90852	14.3704	0.760991	0.0554083	0.90852	433.668	3.19162	-1.1896
MPC.14.1	4.89098e-11	434.939	79.3858	0.188545	14.3987	0.813059	0.0566381	1.06865	14.3987	0.813059	0.0566381	1.06865	432.845	3.40373	9.66296
MPC.31.1	7.76031e-10	313.605	42.4115	0.139701	14.2673	0.853443	0.0556388	2.01604	14.2673	0.853443	0.0556388	2.01604	436.7	3.60355	0.303571
MPC.27.1	0.0161703	513.934	88.0185	0.176916	14.5583	0.783331	0.0550477	0.990905	14.5607	0.783498	0.0549168	1.02164	428.187	3.24584	-4.89167
MPC.23.1	0.0167813	459.703	94.4933	0.212336	14.3176	0.793137	0.0558791	0.99594	14.32	0.793315	0.0557433	1.02784	435.146	3.33814	1.63978
MPC.24.1	0.0208047	404.475	61.7394	0.157678	14.3592	0.824924	0.0552055	1.11643	14.3622	0.825186	0.055037	1.16119	433.91	3.46272	-5.04482
MPC.19.1	0.0234127	350.262	70.908	0.209123	14.2016	0.847697	0.0542243	1.19117	14.205	0.848021	0.0540343	1.24627	438.553	3.59534	-18.35
MPC.35.1	0.0237062	616.299	115.114	0.192946	14.3037	1.00187	0.0555191	0.843829	14.3071	1.00201	0.0553272	0.881792	435.525	4.21985	-2.44468
MPC.29.1	0.0396365	436.82	78.7024	0.186117	14.6009	0.814923	0.0558331	1.08462	14.6067	0.815405	0.0555125	1.1653	426.881	3.36806	1.44233
MPC.6.1	0.0431855	380.861	48.6852	0.132048	14.4318	0.83158	0.0556455	1.13462	14.438	0.832141	0.0552959	1.22672	431.705	3.47474	-1.82763
MPC.5.1	0.0457345	528.724	76.3292	0.149129	14.357	0.776361	0.0563394	0.952177	14.3636	0.77681	0.0559695	1.03214	433.868	3.25941	3.96251
MPC.22.1	0.0561315	421.716	48.7507	0.119416	14.1063	0.807325	0.054785	2.1566	14.1142	0.807976	0.0543297	2.22911	441.279	3.44613	-15.2049
MPC.11.1	0.0582101	434.777	94.5165	0.224565	14.5108	0.81256	0.0545845	1.08405	14.5192	0.813255	0.0541127	1.20452	429.37	3.37812	-14.7538
MPC.15.1	0.0730275	340.54	50.685	0.153749	14.553	0.8542	0.056263	1.2021	14.5636	0.855241	0.0556723	1.36156	428.103	3.54239	2.64009
MPC.28.1	0.0813322	508.064	47.0073	0.0955757	14.2664	0.783736	0.0559577	1.59399	14.278	0.784581	0.055299	1.70004	436.383	3.31047	-2.93698
MPC.34.1	0.0841855	269.548	26.7882	0.102661	14.4986	0.880697	0.0559699	1.28921	14.5108	0.88204	0.0552885	1.48772	429.61	3.66582	-1.39019
MPC.17.1	0.0917951	468.892	61.0719	0.134545	14.4082	1.11342	0.0556339	1.04231	14.4214	1.11418	0.0548905	1.21891	432.185	4.65746	-6.19229
MPC.26.1	0.0928232	621.724	90.8128	0.150886	14.4083	1.00287	0.056925	0.875936	14.4217	1.00348	0.0561743	1.02223	432.179	4.19465	6.09761
MPC.8.1	0.0955926	460.847	115.912	0.25982	14.947	1.2214	0.0551285	1.07271	14.9613	1.22215	0.0543548	1.26176	417.084	4.936	-8.38035
MPC.4.1	0.0956982	434.067	40.7218	0.0969106	14.5909	0.810603	0.0556329	1.07066	14.6049	0.811734	0.0548581	1.25735	426.932	3.35329	-5.20945
MPC.3.1	0.101555	474.398	56.6038	0.123255	14.4098	0.792028	0.0555442	1.0021	14.4244	0.793115	0.0547215	1.18923	432.099	3.31471	-8.05713
MPC.16.1	0.110197	317.276	73.5028	0.239313	14.7016	0.877894	0.0560606	1.28146	14.7178	0.879625	0.055169	1.53421	423.763	3.60765	-1.15501
MPC.2.1	0.111858	315.836	45.0141	0.147227	14.6078	1.18448	0.0559746	1.30118	14.6241	1.1858	0.0550692	1.55896	426.389	4.89253	-2.82728
MPC.1.1	0.149541	281.394	29.308	0.10759	14.7165	0.899329	0.0571162	1.31885	14.7385	0.90182	0.0559075	1.6609	423.186	3.6938	5.87413
MPC.32.1	0.163515	368.909	37.6801	0.10551	14.4861	0.843275	0.0557763	1.17757	14.5098	0.845545	0.0544515	1.5193	429.639	3.51438	-10.5743
MPC.9.1	0.166937	544.125	101.258	0.192235	14.3385	0.776053	0.0560185	0.955901	14.3624	0.777689	0.0546658	1.23341	433.902	3.26335	-9.16385
MPC.21.1	0.190077	403.094	28.1581	0.0721601	13.2701	0.815762	0.0568641	1.05984	13.2953	0.817982	0.0553206	1.40461	467.495	3.68866	-10.3119

## Sheet: MPU table
Spot Name	4-corr %com 206Pb	ppm U	ppm Th	232Th/ 238U	total 238U /206Pb*	% err	total 207Pb* /206Pb*	% err	4corr 238U /206Pb*	% err	204Pb corr 207Pb* /206Pb*	% err	204Pb corr 206Pb /238U Age, Ma	1σ err, Ma	% Dis- cor- dant
MPU.23.1	-0.19994	393.111	61.7355	0.162226	14.5605	0.834979	0.0557719	1.1531	14.5314	0.837624	0.0573859	1.45823	429.021	3.47661	15.7924
MPU.3.1	-0.10911	638.45	76.2355	0.123348	14.2851	0.749112	0.0562664	0.853703	14.2695	0.750014	0.057148	0.987683	436.633	3.16637	12.6073
MPU.11.1	-0.0760281	549.785	100.994	0.18976	14.497	0.773815	0.0562247	0.940524	14.486	0.77456	0.0568389	1.0476	430.322	3.22429	11.7081
MPU.1.1	-0.047093	364.87	31.4796	0.0891233	14.8081	0.845233	0.0545468	1.20111	14.8012	0.845888	0.0549279	1.28911	421.452	3.45098	-3.06993
MPU.26.1	-0.0196842	426.263	73.7996	0.178845	14.3843	0.816602	0.0561201	1.07703	14.3815	0.816839	0.0562793	1.11038	433.347	3.4234	6.70641
MPU.18.1	-3.78176e-10	277.784	31.4764	0.117052	14.4217	0.900682	0.0561259	1.33362	14.4217	0.900682	0.0561259	1.33362	432.178	3.76493	5.69065
MPU.13.1	-1.94732e-10	542.361	87.5501	0.166751	14.5053	0.791975	0.0550659	0.96409	14.5053	0.791975	0.0550659	0.96409	429.769	3.29268	-3.70421
MPU.4.1	-6.0563e-11	356.56	38.3148	0.111003	14.6855	0.851506	0.0568346	1.19006	14.6855	0.851506	0.0568346	1.19006	424.664	3.49951	12.8765
MPU.32.1	9.112e-11	481.09	79.0289	0.169691	14.5662	0.799901	0.0560328	1.03958	14.5662	0.799901	0.0560328	1.03958	428.029	3.31262	5.84084
MPU.28.1	0.0180078	444.996	64.4643	0.149645	14.3069	0.801587	0.0560528	1.03044	14.3095	0.80179	0.0559071	1.06568	435.455	3.37612	3.04844
MPU.19.1	0.0602653	403.893	61.4253	0.157102	14.3053	0.822027	0.0555463	1.09813	14.3139	0.822764	0.0550582	1.22115	435.326	3.46344	-5.17329
MPU.21.1	0.0616414	408.64	36.8438	0.0931375	14.4395	0.822065	0.0547674	1.11748	14.4484	0.822835	0.0542678	1.24753	431.406	3.43359	-13.3165
MPU.31.1	0.0644956	674.767	104.77	0.160392	14.4779	0.75419	0.0564231	0.867803	14.4873	0.754742	0.0559015	0.970866	430.286	3.14153	4.18885
MPU.24.1	0.0648493	388.769	63.1749	0.167862	14.5062	0.830692	0.0557496	1.13401	14.5156	0.831536	0.0552247	1.27035	429.473	3.45486	-1.99755
MPU.33.1	0.0789015	498.654	70.2266	0.14548	14.476	0.78013	0.0559188	0.963546	14.4874	0.780929	0.0552801	1.10403	430.282	3.25051	-1.63835
MPU.14.1	0.0867243	484.587	84.7685	0.180702	14.5557	0.793627	0.0554846	1.01576	14.5683	0.794576	0.0547823	1.17876	427.97	3.29013	-6.30933
MPU.17.1	0.0868018	397.992	69.0398	0.179195	14.4134	0.872228	0.0553873	1.1371	14.426	0.873309	0.0546841	1.32021	432.054	3.6495	-8.47313
MPU.12.1	0.0887144	573.858	65.8479	0.118533	14.518	1.02073	0.0564722	0.928543	14.5309	1.02138	0.0557547	1.07828	429.036	4.23943	3.17038
MPU.16.1	0.0976755	606.299	88.7602	0.151228	14.5278	0.790996	0.055519	0.908371	14.542	0.791859	0.054728	1.07233	428.718	3.28442	-7.11011
MPU.29.1	0.112148	555.949	76.8252	0.142748	14.3714	0.765412	0.0571619	0.900524	14.3875	0.766441	0.056255	1.07926	433.17	3.2109	6.54586
MPU.6.1	0.120446	991.431	170.591	0.177743	14.4302	0.850351	0.0561389	0.687095	14.4476	0.85092	0.0551637	0.836046	431.427	3.55095	-3.1008
MPU.2.1	0.15061	445.5	61.3228	0.142192	14.5525	0.807901	0.0563059	1.04756	14.5745	0.809659	0.0550868	1.32819	427.795	3.35125	-2.99477
MPU.7.1	0.159831	277.021	31.1337	0.116096	14.7691	0.913428	0.0560387	1.38354	14.7927	0.916229	0.0547451	1.7699	421.685	3.73994	-5.10523
MPU.9.1	0.180171	437.362	60.3753	0.1426	14.6566	0.817095	0.0556726	1.08383	14.6831	0.819307	0.0542131	1.43236	424.732	3.3677	-12.191
MPU.5.1	0.184617	450.556	60.489	0.138684	14.5893	0.803352	0.0566707	1.03927	14.6163	0.805479	0.0551766	1.37099	426.611	3.32503	-1.77997
MPU.8.1	0.21084	543.546	102.282	0.194385	14.3951	1.10405	0.0570149	0.937977	14.4255	1.10549	0.0553081	1.27363	432.067	4.61992	-1.79402
MPU.20.1	0.232157	475.124	63.9912	0.139128	14.5601	0.797647	0.0557236	1.03295	14.594	0.800254	0.0538416	1.44658	427.24	3.30817	-17.8132
MPU.22.1	0.245986	428.765	69.0288	0.166307	14.4208	1.08967	0.0563863	1.05782	14.4564	1.09181	0.0543929	1.49897	431.174	4.55362	-11.6965
MPU.10.1	0.557742	433.226	80.9054	0.192914	14.4496	0.810516	0.0578167	1.05135	14.5306	0.817183	0.0532916	1.95727	429.044	3.39195	-26.6023
MPU.35.1	2.42291	351.405	58.7618	0.172738	13.9576	0.802381	0.0774104	1.69156	14.3041	0.837367	0.0578517	4.06823	435.612	3.52716	17.4675
MPU.27.1	5.70129	466.59	63.6258	0.140863	13.7876	1.11208	0.0996789	2.714	14.6212	1.164	0.0534417	7.48521	426.473	4.80348	-23.4524
MPU.34.1	6.17743	434.824	44.6287	0.106023	13.2663	1.11445	0.10728	3.34322	14.1398	1.16196	0.0573617	8.11649	440.507	4.94757	13.2947
MPU.46.1	9.31053	639.254	41.7475	0.0674617	12.9319	0.913561	0.127212	3.33189	14.2596	0.980219	0.051449	10.6818	436.929	4.14094	-69.7281
MPU.25.1	12.4949	479.678	53.5946	0.115418	12.4399	0.773813	0.161267	1.02983	14.2163	0.923136	0.0607407	7.36336	438.216	3.91089	31.4904
MPU.30.1	13.1416	440.795	99.0919	0.232222	12.3992	1.9481	0.170621	6.67505	14.2752	2.74556	0.0655389	30.9424	436.466	11.5867	46.3904
MPU.15.1	16.0456	679.435	82.2459	0.125045	12.4281	1.92975	0.18672	4.80746	14.8034	2.20627	0.0572626	23.9936	421.39	8.99965	16.5283
1. % com 206Pb indicates the proportion of common 206Pb in the total measures 206Pb
2. Pb isotopic ratios corrected for common Pb by using measured 204Pb and a stacy-kramer common Pb composition appropriate to the age of the zircon.
3. All errors reported as 1σ
