# Supplementary material for: Effect of chemical abrasion of zircon on SIMS U–Pb, δ 18 O, trace element, and LA-ICPMS trace element and Lu–Hf isotopic analyses
Source: Copernicus journal article supplement (doi:10.5194/gchron-6-337-2024), 2024-07-10
Supplement: Supplementary file 9 [file Table S6-SH2-UPb-MtPainter-redo.xls]

## Sheet: MPC table
Rims
Spot Name	4-corr %com 206	ppm U	ppm Th	232Th /238U	4corr 238 /206*	% err	4corr 207* /206*	% err	204corr 206Pb /238U Age	1s err	% Dis- cor- dant
MPC.12.1	0.0774898	621.834	97.7677	0.162413	14.4707	0.448934	0.0547923	1.00144	430.761	1.87064	-6.9143
MPC.12.2	0.0489748	460.824	94.9087	0.212751	14.6477	0.501492	0.0552392	1.07608	425.725	2.06601	-0.932699
MPC.21.2	0.0441048	645.072	75.1267	0.120306	14.369	0.712034	0.0551643	0.876061	433.71	2.98656	-3.65836
MPC.22.1	-0.0207554	360.599	43.9345	0.125858	14.2901	0.568155	0.0549409	1.15809	436.026	2.39538	-6.61376
MPC.22.2	-0.0377879	417.202	54.0781	0.133898	14.4645	0.538729	0.0547897	1.13961	430.94	2.2457	-6.98861
MPC.8.2	0.065371	580.005	103.58	0.184478	14.2179	0.456607	0.0550123	0.997262	438.168	1.93422	-6.37723
MPC.8.3	0.0378916	560.474	105.478	0.194404	14.5782	0.784767	0.0558502	0.923769	427.688	3.24744	4.33635
Cores
Spot Name	4-corr %com 206	ppm U	ppm Th	232Th /238U	4corr 238 /206*	% err	4corr 207* /206*	% err	204corr 206Pb /238U Age	1s err	% Dis- cor- dant
MPC2.12.1	0.0586668	247.152	236.548	0.988681	6.35975	1.64983	0.0704775	1.30391	941.415	14.4509	0.100808
MPC2.21.2	-0.0234882	615	85.5391	0.143678	7.52733	4.23205	0.0715135	3.02656	804.099	31.9931	18.38
MPC2.22.1	0.164031	290.285	125.985	0.448326	10.6734	0.930888	0.0588525	1.2875	577.326	5.14063	-2.9189
MPC2.22.2	3.7081e-10	233.174	87.2327	0.386456	10.8951	0.76305	0.0582539	1.29574	566.08	4.13525	-5.18193
MPC2.8.2	0.0820319	200.042	94.7999	0.489539	5.62905	2.78303	0.0766095	2.00879	1054.12	27.0635	5.55279
MPC2.8.3	-0.0366482	321.799	156.231	0.501512	5.8867	2.59487	0.081018	5.97129	1011.42	24.2898	18.6031
