# Supplementary material for: Effect of chemical abrasion of zircon on SIMS U–Pb, δ 18 O, trace element, and LA-ICPMS trace element and Lu–Hf isotopic analyses
Source: Copernicus journal article supplement (doi:10.5194/gchron-6-337-2024), 2024-07-10
Supplement: Supplementary file 10 [file Table S7-SI-d18O.xls]

## Sheet: Summary
Sample	Wt Mean 16O/18O ratio	95% conf	δ18O	95% conf	MSWD	prob-ability of fit
T2U	0.00203055	2.4546e-07	8.19839	0.121007	7.90681	2.28254e-21
T2C	0.00202919	2.72608e-07	7.52539	0.134611	9.02802	7.54096e-28
91U	0.00203454	2.66468e-07	10.1682	0.131376	11.2384	6.81065e-35
91C	0.0020341	2.61807e-07	9.95236	0.129248	7.28495	3.66761e-20
QNU	0.0020289	2.89713e-07	7.38442	0.143184	12.9373	1.58355e-47
QNC	0.00202897	2.96989e-07	7.418	0.146569	9.4682	3.24355e-28
OGU	0.002026	2.35439e-07	5.95297	0.116244	6.93696	2.6988e-23
OGC	0.00202567	2.16414e-07	5.78867	0.106707	5.59974	3.6638e-14
MPU	0.00203242	7.88368e-07	9.12702	0.389073	43.2244	1.01628e-203
MPC	0.00203304	9.54405e-07	9.4303	0.469925	57.9958	8.92986e-222

## Sheet: Sheet1
Title	MC_G_Ratio_O_HM/O_LM_EISIE_corr	wStdErr1s	reject	ratio_permil	wStdErr1s_permil
915.1.1	0.0020328	1.52e-07	no	9.30815	0.0747463
915.10.1	0.00203314	2.02e-07	no	9.4763	0.0994052
915.11.1	0.00203259	1.86e-07	no	9.2053	0.0914228
915.12.1	0.00203278	2.78e-07	no	9.30166	0.136999
915.13.1	0.00203296	3.42e-07	no	9.38901	0.168435
915.14.1	0.0020332	3.7e-07	no	9.50912	0.181951
915.15.1	0.00203347	1.84e-07	no	9.64034	0.0904503
915.16.1	0.00203338	1.3e-07	no	9.59878	0.0641596
915.17.1	0.00203305	2.96e-07	no	9.43463	0.145514
915.18.1	0.00203305	2.49e-07	no	9.43205	0.122626
915.19.1	0.00203419	1.7e-07	no	9.99821	0.0835068
915.2.1	0.0020335	2.27e-07	no	9.65627	0.111421
915.20.1	0.00203419	2e-07	no	9.99767	0.0985305
915.21.1	0.00203529	4.06e-07	no	10.5394	0.199588
915.22.1	0.00203349	2.99e-07	no	9.64929	0.147258
915.23.1	0.00203449	3.39e-07	no	10.1443	0.166736
915.24.1	0.00203446	2.34e-07	no	10.1279	0.114828
915.25.1	0.00203489	3.2e-07	no	10.344	0.157259
915.26.1	0.00203389	3.71e-07	no	9.84638	0.18237
915.27.1	0.00203439	2.98e-07	no	10.096	0.146518
915.28.1	0.0020346	3.4e-07	no	10.1983	0.167317
915.29.1	0.00203276	1.83e-07	no	9.29218	0.0901409
915.3.1	0.00203471	2.85e-07	no	10.2555	0.140162
915.30.1	0.00203406	2.91e-07	no	9.93357	0.142828
915.5.1	0.00203429	2.75e-07	no	10.0456	0.135393
915.6.1	0.00203306	2.57e-07	no	9.43784	0.126199
915.7.1	0.00203299	2.83e-07	no	9.40468	0.139198
915.8.1	0.00203392	2.95e-07	no	9.865	0.144877
915.9.1	0.00203444	2.79e-07	no	10.1193	0.137337
915.9.1	0.00203252	3.38e-07	no	9.17159	0.166259
91C.10.1	0.00203427	2.76e-07	no	10.0379	0.135496
91C.11.1	0.00203443	2.07e-07	no	10.1155	0.101829
91C.12.1	0.00203426	2.82e-07	no	10.0328	0.138779
91C.13.1	0.00203461	2.54e-07	no	10.2047	0.124868
91C.14.1	0.0020346	1.85e-07	no	10.1971	0.0906875
91C.15.1	0.00203526	2.34e-07	no	10.5264	0.114895
91C.16.1	0.00203453	1.96e-07	no	10.1622	0.0964671
91C.17.1	0.00203481	1.72e-07	no	10.3007	0.0846868
91C.18.1	0.00203443	3.11e-07	no	10.1171	0.152925
91C.19.1	0.00203423	2.44e-07	no	10.0145	0.11994
91C.2.1	0.00203387	1.83e-07	no	9.8373	0.0901523
91C.20.1	0.00203466	2.91e-07	no	10.2267	0.142777
91C.21.1	0.0020344	2.5e-07	no	10.1018	0.122699
91C.22.1	0.00203407	1.91e-07	no	9.93597	0.0940876
91C.23.1	0.00203257	4.98e-07	no	9.19828	0.245013
91C.4.1	0.00203332	1.59e-07	no	9.56619	0.078401
91C.5.1	0.00203384	1.74e-07	no	9.82331	0.0854979
91C.6.1	0.00203355	1.89e-07	no	9.68212	0.093089
91C.7.1	0.0020333	1.71e-07	no	9.55555	0.0842669
91C.8.1	0.00203383	1.53e-07	no	9.81756	0.0753275
	0.0020341	Wtd Mean (from internal errs)		9.95236	Wtd Mean (from internal errs)
	2.61807e-07	95%-conf. err. of mean		0.129248	95%-conf. err. of mean
	7.28495	MSWD		7.33515	MSWD
	0	rejected		0	rejected
	3.66761e-20	Probability of fit		2.41107e-20	Probability of fit
	0	0		0	0
	User specifies			User specifies
	FALSE	% out		FALSE	% out
	FALSE	% in		FALSE	% in
	1	Sigma level		1	Sigma level
	FALSE	Can reject		FALSE	Can reject
	FALSE	Const. ext. err		FALSE	Const. ext. err
91U.1.1	0.002035	2.69e-07	no	10.3942	0.132167
91U.11.1	0.00203419	2.69e-07	no	9.99709	0.132201
91U.13.1	0.00203452	2.18e-07	no	10.1564	0.107354
91U.14.1	0.0020349	1.1e-07	no	10.3484	0.0538601
91U.16.1	0.00203402	1.65e-07	no	9.91443	0.0812517
91U.17.1	0.00203451	1.47e-07	no	10.1561	0.072141
91U.18.1	0.00203486	1.93e-07	no	10.3283	0.0946437
91U.19.1	0.00203477	1.49e-07	no	10.2807	0.0730274
91U.2.1	0.00203418	1.78e-07	no	9.98872	0.0873729
91U.20.1	0.00203365	1.55e-07	no	9.72877	0.0762473
91U.21.1	0.00203567	1.78e-07	no	10.729	0.0876268
91U.22.1	0.00203434	1.51e-07	no	10.0705	0.0743567
91U.23.1	0.00203535	2.66e-07	no	10.567	0.130724
91U.24.1	0.00203487	6.33e-07	no	10.3336	0.310856
91U.3.1	0.00203318	1.71e-07	no	9.496	0.0842386
91U.4.1	0.00203435	1.76e-07	no	10.0747	0.0863044
91U.5.1	0.00203527	1.4e-07	no	10.5273	0.0686333
91U.6.1	0.00203452	1.1e-07	no	10.1599	0.0540101
91U.7.1	0.00203469	2.5e-07	no	10.2429	0.122925
91U.9.1	0.00203426	1.97e-07	no	10.0288	0.096634
	0.00203454	Wtd Mean (from internal errs)		10.1682	Wtd Mean (from internal errs)
	2.66468e-07	95%-conf. err. of mean		0.131376	95%-conf. err. of mean
	11.2384	MSWD		11.3281	MSWD
	0	rejected		0	rejected
	6.81065e-35	Probability of fit		3.10575e-35	Probability of fit
	0	0		0	0
	User specifies			User specifies
	FALSE	% out		FALSE	% out
	FALSE	% in		FALSE	% in
	1	Sigma level		1	Sigma level
	FALSE	Can reject		FALSE	Can reject
	FALSE	Const. ext. err		FALSE	Const. ext. err
FC1.10.1	0.00202499	1.44e-07	no	5.45493	0.0709449
FC1.11.1	0.00202542	1.83e-07	no	5.66435	0.0901761
FC1.12.1	0.00202582	1.94e-07	no	5.8627	0.0955591
FC1.13.1	0.00202476	1.51e-07	no	5.34097	0.0747171
FC1.14.1	0.00202443	1.88e-07	no	5.17561	0.0927122
FC1.15.1	0.00202618	2.18e-07	no	6.0399	0.107386
FC1.16.1	0.00202537	1.82e-07	no	5.63924	0.0897355
FC1.17.1	0.00202477	1.52e-07	no	5.34584	0.0752567
FC1.18.1	0.00202493	2.02e-07	no	5.4247	0.0997219
FC1.19.1	0.00202565	1.85e-07	no	5.78213	0.0914088
FC1.20.1	0.0020245	2.75e-07	no	5.21429	0.135799
FC1.21.1	0.00202538	9.37e-07	no	5.64571	0.462632
FC1.21.2	0.00202451	2.29e-07	no	5.21818	0.113156
FC1.22.1	0.00202489	1.78e-07	no	5.40356	0.0878522
FC1.23.1	0.0020259	3.25e-07	no	5.90236	0.160446
FC1.24.1	0.00202565	1.93e-07	no	5.78069	0.0954329
FC1.25.1	0.00202659	1.58e-07	no	6.24577	0.078128
FC1.26.1	0.00202556	3.91e-07	no	5.73512	0.193084
FC1.27.1	0.00202607	2.85e-07	no	5.98856	0.140625
FC1.28.1	0.0020253	2.38e-07	no	5.60592	0.11732
FC1.29.1	0.00202553	2.75e-07	no	5.72209	0.135657
FC1.30.1	0.00202206	7.41e-07	yes	4.00421	0.366281
FC1.31.1	0.00202583	1.74e-07	no	5.86614	0.0860918
FC1.32.1	0.00202436	1.39e-07	no	5.14364	0.0685416
FC1.33.1	0.00202541	2.21e-07	no	5.6616	0.109022
FC1.34.1	0.00202539	2.84e-07	no	5.65258	0.14008
FC1.35.1	0.00202475	1.78e-07	no	5.33378	0.0881572
FC1.9.1	0.00202613	3e-07	no	6.0149	0.148175
MPC.1.1	0.00203506	3.59e-07	no	10.4267	0.176536
MPC.10.1	0.00203079	3.55e-07	no	8.31859	0.174946
MPC.11.1	0.00203284	2.59e-07	no	9.33161	0.12728
MPC.13.1	0.00203323	1.35e-07	no	9.52189	0.066352
MPC.14.1	0.00203358	2.12e-07	no	9.69384	0.104016
MPC.15.1	0.00203235	9.02e-07	no	9.08654	0.443612
MPC.16.1	0.00203253	2.25e-07	no	9.17758	0.110624
MPC.17.1	0.0020312	2.92e-07	no	8.51927	0.143963
MPC.2.1	0.00203443	2.62e-07	no	10.1128	0.128538
MPC.20.1	0.00203248	1.73e-07	no	9.1503	0.0848912
MPC.21.1	0.00203095	7.2e-07	no	8.3968	0.354487
MPC.25.1	0.0019793	1.993e-06	yes	-17.1058	1.00671
MPC.26.1	0.00203294	2.22e-07	no	9.37811	0.109072
MPC.27.1	0.00203276	5.76e-07	no	9.2921	0.283408
MPC.3.1	0.0020269	3.91e-07	no	6.39771	0.192951
MPC.36.1	0.00203614	3.14e-07	no	10.957	0.154392
MPC.4.1	0.00203055	1.679e-06	no	8.19793	0.826774
MPC.5.1	0.00203429	4.12e-07	no	10.0451	0.202375
MPC.7.1	0.00203569	1.9e-07	no	10.7389	0.0932365
MPC.8.1	0.00203124	2.86e-07	no	8.53735	0.140847
MPC.9.1	0.00202121	6.43e-07	yes	3.58937	0.31788
	0.00203304	Wtd Mean (from internal errs)		9.4303	Wtd Mean (from internal errs)
	9.54405e-07	95%-conf. err. of mean		0.469925	95%-conf. err. of mean
	57.9958	MSWD		58.2168	MSWD
	0	rejected		0	rejected
	8.92986e-222	Probability of fit		1.13031e-222	Probability of fit
	0	0		0	0
	User specifies			User specifies
	FALSE	% out		FALSE	% out
	FALSE	% in		FALSE	% in
	1	Sigma level		1	Sigma level
	FALSE	Can reject		FALSE	Can reject
	FALSE	Const. ext. err		FALSE	Const. ext. err
MPC2.10.2	0.00202872	3.69e-07	no	7.29594	0.18192
MPC2.100.2	0.0020324	2.08e-07	no	9.11099	0.102523
MPC2.102.2	0.00203235	2.93e-07	no	9.08864	0.144064
MPC2.2.2	0.00202321	3.1e-07	no	4.57303	0.153006
MPC2.21.2	0.00202918	3.05e-07	no	7.52239	0.150472
MPC2.25.2	0.00202552	1.514e-06	no	5.71464	0.747459
MPC2.26.2	0.00202638	2.38e-07	no	6.13844	0.117632
MPC2.27.2	0.00202846	2.32e-07	no	7.1644	0.114307
MPC2.28.2	0.00203482	2.7e-07	no	10.3066	0.132465
MPC2.28.2	0.00202604	2.54e-07	no	5.96987	0.125587
MPC2.36.2	0.00203095	2.32e-07	no	8.39642	0.114292
MPC2.39.2	0.00203215	2.26e-07	no	8.98979	0.111415
MPC2.42.2	0.00202584	1.733e-06	no	5.87389	0.855435
MPC2.50.2	0.00203365	2.09e-07	no	9.73102	0.102657
MPC2.55.2	0.0020323	2.63e-07	no	9.06357	0.129272
MPC2.57.2	0.00203094	3.22e-07	no	8.39021	0.158333
MPC2.58.2	0.00202904	4.93e-07	no	7.45136	0.242971
MPC2.59.2	0.00202823	3.08e-07	no	7.05236	0.151951
MPC2.67.2	0.00203602	3.66e-07	no	10.8985	0.179792
MPC2.72.2	0.00202953	1.98e-07	no	7.69342	0.0974393
MPC2.75.2	0.00203061	2.31e-07	no	8.23005	0.113981
MPC2.77.2	0.00203117	1.72e-07	no	8.50384	0.0844889
MPC2.78.2	0.00203068	2.57e-07	no	8.26306	0.126483
MPC2.8.2	0.00203374	2.99e-07	no	9.77468	0.147141
MPC2.80.2	0.00203201	2.82e-07	no	8.92202	0.138907
MPC2.86.2	0.00203025	3.26e-07	no	8.0528	0.160507
MPC2.88.2	0.00203383	1.69e-07	no	9.81631	0.0832946
MPC2.91.2	0.00202502	2.51e-07	no	5.46877	0.124049
MPC2.97.2	0.00202632	3.05e-07	no	6.11287	0.150306
MPC2.98.2	0.00202753	3.71e-07	no	6.70963	0.182774
MPU.1.1	0.00203157	7.17e-07	no	8.70393	0.352857
MPU.10.1	0.00203454	4.2e-07	no	10.1686	0.206481
MPU.11.1	0.00202687	4.16e-07	no	6.38248	0.205431
MPU.12.1	0.00203147	2.45e-07	no	8.65464	0.1208
MPU.13.1	0.00203402	3.7e-07	no	9.91218	0.181733
MPU.14.1	0.00203325	2.91e-07	no	9.5316	0.143131
MPU.16.1	0.00203431	3.67e-07	no	10.0567	0.18057
MPU.17.1	0.00203383	2.14e-07	no	9.81729	0.10532
MPU.19.1	0.00203056	5.78e-07	no	8.20494	0.284787
MPU.2.1	0.00203032	6.55e-07	no	8.08425	0.32265
MPU.20.1	0.00203322	3.11e-07	no	9.51894	0.153041
MPU.21.1	0.00203138	5.23e-07	no	8.60819	0.257546
MPU.22.1	0.002035	2.61e-07	no	10.3981	0.128058
MPU.25.1	0.00203411	2.88e-07	no	9.95569	0.141555
MPU.28.1	0.0020354	4.32e-07	no	10.5916	0.212163
MPU.3.1	0.00203168	2.99e-07	no	8.75487	0.147124
MPU.31.1	0.0020333	2.34e-07	no	9.55748	0.114902
MPU.32.1	0.00202972	3.03e-07	no	7.78806	0.149082
MPU.4.1	0.00203414	2.44e-07	no	9.97391	0.120114
MPU.46.1	0.00203301	9.55e-07	no	9.41104	0.469629
MPU.5.1	0.00203373	2.89e-07	no	9.76795	0.142289
MPU.6.1	0.00203035	1.74e-07	no	8.10224	0.0859211
MPU.7.1	0.00203176	2.63e-07	no	8.79822	0.129653
MPU.8.1	0.00203426	2.59e-07	no	10.0325	0.127479
MPU.9.1	0.00203038	1.72e-07	no	8.11298	0.0848094
	0.00203242	Wtd Mean (from internal errs)		9.12702	Wtd Mean (from internal errs)
	7.88368e-07	95%-conf. err. of mean		0.389073	95%-conf. err. of mean
	43.2244	MSWD		43.4309	MSWD
	0	rejected		0	rejected
	1.01628e-203	Probability of fit		8.9845e-205	Probability of fit
	0	0		0	0
	User specifies			User specifies
	FALSE	% out		FALSE	% out
	FALSE	% in		FALSE	% in
	1	Sigma level		1	Sigma level
	FALSE	Can reject		FALSE	Can reject
	FALSE	Const. ext. err		FALSE	Const. ext. err
MPU2.10.2	0.0020329	3.35e-07	no	9.36125	0.164943
MPU2.105.2	0.00202637	1.99e-07	no	6.13562	0.0980862
MPU2.11.2	0.00202841	3.08e-07	no	7.14381	0.151809
MPU2.19.2	0.00203667	2.64e-07	no	11.2192	0.129409
MPU2.22.2	0.00202701	5e-07	no	6.44858	0.246809
MPU2.25.2	0.00202028	1.96e-07	no	3.12875	0.0970458
MPU2.3.2	0.00202768	1.84e-07	no	6.78333	0.0907162
MPU2.31.2	0.00202512	2.78e-07	no	5.51674	0.137433
MPU2.32.2	0.00202687	1.57e-07	no	6.38155	0.0776585
MPU2.36.2	0.00202839	2.34e-07	no	7.12968	0.115253
MPU2.39.2	0.00202844	1.75e-07	no	7.15631	0.0861772
MPU2.46.2	0.00202725	2e-07	no	6.57187	0.0986614
MPU2.47.2	0.00202911	7.71e-07	no	7.48766	0.380043
MPU2.50.2	0.00202472	1.86e-07	no	5.32072	0.0918971
MPU2.51.2	0.00203345	2.05e-07	no	9.63326	0.100925
MPU2.54.2	0.00203287	3.4e-07	no	9.34656	0.167121
MPU2.57.2	0.00202685	2.81e-07	no	6.36953	0.138573
MPU2.60.2	0.00203307	1.98e-07	no	9.44129	0.0973837
MPU2.62.2	0.0020298	2.11e-07	no	7.82867	0.103734
MPU2.68.2	0.00202919	2.93e-07	no	7.52608	0.144412
MPU2.69.2	0.00202886	1.57e-07	no	7.36417	0.0772686
MPU2.71.2	0.00202773	2.39e-07	no	6.8079	0.117917
MPU2.74.2	0.00203009	2.16e-07	no	7.97214	0.106506
MPU2.75.2	0.00202877	1.91e-07	no	7.31867	0.0943317
MPU2.76.2	0.00203074	3.05e-07	no	8.29363	0.150415
MPU2.77.2	0.00203542	3.34e-07	no	10.6013	0.164149
MPU2.80.2	0.00203247	1.98e-07	no	9.14876	0.0975674
MPU2.81.2	0.00203345	2.82e-07	no	9.63293	0.138506
MPU2.83.2	0.00203142	1.57e-07	no	8.62716	0.0771148
MPU2.87.2	0.00203104	3.87e-07	no	8.44291	0.190612
MPU2.91.2	0.00203021	3.17e-07	no	8.02976	0.156178
MPU2.92.2	0.00202749	1.98e-07	no	6.69025	0.0975893
MPU2.93.2	0.00202586	3.26e-07	no	5.88425	0.160989
MPU2.97.2	0.00203207	1.73e-07	no	8.95185	0.0852634
MPU2.98.2	0.00202515	3.08e-07	no	5.53328	0.152233
OGC.1.1	0.00202545	1.74e-07	no	5.68268	0.0860092
OGC.10.1	0.00202578	1.83e-07	no	5.84219	0.0901984
OGC.11.1	0.00202543	1.88e-07	no	5.67	0.0929532
OGC.12.1	0.00202464	1.7e-07	no	5.28007	0.0841757
OGC.13.1	0.00202563	1.76e-07	no	5.77001	0.0866978
OGC.14.1	0.00202644	2.79e-07	no	6.17089	0.137752
OGC.15.1	0.00202554	2.17e-07	no	5.72444	0.106946
OGC.16.1	0.00202575	1.9e-07	no	5.82689	0.0936572
OGC.17.1	0.00202621	2.3e-07	no	6.0563	0.113706
OGC.18.1	0.00202639	2.66e-07	no	6.14321	0.131499
OGC.19.1	0.00202602	1.89e-07	no	5.96025	0.0930443
OGC.2.1	0.00202525	1.48e-07	no	5.58116	0.0729593
OGC.20.1	0.00202656	3.4e-07	no	6.23012	0.167548
OGC.3.1	0.00202554	1.97e-07	no	5.72703	0.097112
OGC.4.1	0.00202566	2.41e-07	no	5.7853	0.119017
OGC.5.1	0.00202572	1.37e-07	no	5.81666	0.067712
OGC.6.1	0.00202637	1.68e-07	no	6.13304	0.0831025
OGC.7.1	0.00202581	1.83e-07	no	5.85655	0.0901563
OGC.8.1	0.00202507	2.23e-07	no	5.49395	0.110278
OGC.9.1	0.00202608	3.8e-07	no	5.99205	0.187617
	0.00202567	Wtd Mean (from internal errs)		5.78867	Wtd Mean (from internal errs)
	2.16414e-07	95%-conf. err. of mean		0.106707	95%-conf. err. of mean
	5.59974	MSWD		5.58698	MSWD
	0	rejected		0	rejected
	3.6638e-14	Probability of fit		4.05823e-14	Probability of fit
	0	0		0	0
	User specifies			User specifies
	FALSE	% out		FALSE	% out
	FALSE	% in		FALSE	% in
	1	Sigma level		1	Sigma level
	FALSE	Can reject		FALSE	Can reject
	FALSE	Const. ext. err		FALSE	Const. ext. err
OGU.1.1	0.0020252	2.79e-07	no	5.55895	0.137539
OGU.10.1	0.00202485	1.96e-07	no	5.38606	0.0969201
OGU.11.1	0.0020257	2.12e-07	no	5.80289	0.104631
OGU.12.1	0.00202585	1.91e-07	no	5.87902	0.0940567
OGU.13.1	0.00202566	1.96e-07	no	5.78348	0.0966631
OGU.14.1	0.00202588	3.24e-07	no	5.89177	0.160031
OGU.15.1	0.00202653	1.44e-07	no	6.21303	0.0712894
OGU.16.1	0.00202669	1.91e-07	no	6.29218	0.0944711
OGU.17.1	0.00202639	1.41e-07	no	6.1437	0.069679
OGU.18.1	0.00202706	1.75e-07	no	6.47688	0.0861637
OGU.19.1	0.00202609	1.89e-07	no	5.99574	0.0933295
OGU.2.1	0.00202639	4.92e-07	no	6.14391	0.242784
OGU.20.1	0.0020259	2e-07	no	5.90439	0.0988373
OGU.21.1	0.00202612	2.38e-07	no	6.0095	0.117307
OGU.22.1	0.00208078	0.0001038	yes	33.0008	49.8851
OGU.3.1	0.00202488	1.99e-07	no	5.39706	0.0982641
OGU.35.1	0.00202633	2.92e-07	no	6.11411	0.144125
OGU.36.1	0.00202502	6.03e-07	no	5.46886	0.297831
OGU.4.1	0.00202591	4.61e-07	no	5.90972	0.227745
OGU.40.1	0.0020261	3.16e-07	no	6.00263	0.155886
OGU.5.1	0.00202646	2.41e-07	no	6.17917	0.119043
OGU.6.1	0.00202595	1.8e-07	no	5.92955	0.0889534
OGU.7.1	0.00202567	1.41e-07	no	5.7877	0.0693736
OGU.8.1	0.00202593	4.79e-07	no	5.91665	0.236661
OGU.9.1	0.00202583	2.33e-07	no	5.86701	0.115062
	0.002026	Wtd Mean (from internal errs)		5.95297	Wtd Mean (from internal errs)
	2.35439e-07	95%-conf. err. of mean		0.116244	95%-conf. err. of mean
	6.93696	MSWD		6.93952	MSWD
	0	rejected		0	rejected
	2.6988e-23	Probability of fit		2.62754e-23	Probability of fit
	0	0		0	0
	User specifies			User specifies
	FALSE	% out		FALSE	% out
	FALSE	% in		FALSE	% in
	1	Sigma level		1	Sigma level
	FALSE	Can reject		FALSE	Can reject
	FALSE	Const. ext. err		FALSE	Const. ext. err
QGC.1.1	0.00202756	2.05e-07	no	6.72247	0.10126
QGC.10.1	0.0020287	1.75e-07	no	7.28672	0.0864281
QGC.11.1	0.0020297	1.74e-07	no	7.77954	0.0859014
QGC.12.1	0.00202897	1.98e-07	no	7.41938	0.0978216
QGC.13.1	0.00202946	2.01e-07	no	7.66029	0.0990552
QGC.14.1	0.00202941	1.71e-07	no	7.6342	0.0842328
QGC.15.1	0.0020286	1.6e-07	no	7.23493	0.0791143
QGC.16.1	0.00202887	3.19e-07	no	7.37182	0.157045
QGC.17.1	0.0020292	3.17e-07	no	7.53032	0.156057
QGC.18.1	0.00202883	1.44e-07	no	7.34738	0.0710505
QGC.19.1	0.00202988	1.58e-07	no	7.86945	0.0780059
QGC.2.1	0.00202917	2.61e-07	no	7.51907	0.128706
QGC.20.1	0.00202768	2.55e-07	no	6.78093	0.125879
QGC.3.1	0.00202921	4.2e-07	no	7.53774	0.206902
QGC.4.1	0.00202802	3.22e-07	no	6.9497	0.15894
QGC.5.1	0.00202903	2.37e-07	no	7.44959	0.116648
QGC.6.1	0.00202932	1.88e-07	no	7.59118	0.0926745
QGC.7.1	0.0020295	2.2e-07	no	7.68045	0.108468
QGC.8.1	0.00202827	1.96e-07	no	7.07474	0.096521
QGC.9.1	0.00202849	3.01e-07	no	7.18313	0.14823
	0.00202897	Wtd Mean (from internal errs)		7.418	Wtd Mean (from internal errs)
	2.96989e-07	95%-conf. err. of mean		0.146569	95%-conf. err. of mean
	9.4682	MSWD		9.47563	MSWD
	0	rejected		0	rejected
	3.24355e-28	Probability of fit		3.0424e-28	Probability of fit
	0	0		0	0
	User specifies			User specifies
	FALSE	% out		FALSE	% out
	FALSE	% in		FALSE	% in
	1	Sigma level		1	Sigma level
	FALSE	Can reject		FALSE	Can reject
	FALSE	Const. ext. err		FALSE	Const. ext. err
QGU.1.1	0.00202854	1.6e-07	no	7.20666	0.0789431
QGU.10.1	0.00202896	1.7e-07	no	7.41307	0.0837633
QGU.11.1	0.00202944	2.34e-07	no	7.65311	0.1154
QGU.12.1	0.00203053	1.77e-07	no	8.19045	0.0870331
QGU.13.1	0.00202934	1.67e-07	no	7.60324	0.0824615
QGU.14.1	0.00202916	1.69e-07	no	7.51271	0.0832034
QGU.15.1	0.00202957	2.22e-07	no	7.71517	0.109403
QGU.16.1	0.00202829	2.64e-07	no	7.08558	0.130356
QGU.17.1	0.00202814	1.36e-07	no	7.00772	0.0672507
QGU.18.1	0.00202861	2.37e-07	no	7.23977	0.116865
QGU.19.1	0.00202747	1.62e-07	no	6.67765	0.0797573
QGU.2.1	0.00202852	1.93e-07	no	7.19661	0.0953849
QGU.20.1	0.00202913	2.03e-07	no	7.49637	0.100057
QGU.22.1	0.00202893	1.62e-07	no	7.40088	0.0800266
QGU.27.1	0.0020282	5.68e-07	no	7.03806	0.279814
QGU.3.1	0.00202929	1.85e-07	no	7.57542	0.0909471
QGU.33.1	0.00202852	2.4e-07	no	7.19609	0.118423
QGU.4.1	0.0020285	1.79e-07	no	7.18707	0.0884078
QGU.5.1	0.00202921	1.48e-07	no	7.53624	0.0730319
QGU.6.1	0.00202785	2.58e-07	no	6.86432	0.127267
QGU.7.1	0.00202929	1.86e-07	no	7.57569	0.0915607
QGU.8.1	0.00202921	1.48e-07	no	7.53838	0.0728574
QGU.9.1	0.00202946	2.34e-07	no	7.66243	0.115545
	0.0020289	Wtd Mean (from internal errs)		7.38442	Wtd Mean (from internal errs)
	2.89713e-07	95%-conf. err. of mean		0.143184	95%-conf. err. of mean
	12.9373	MSWD		12.9953	MSWD
	0	rejected		0	rejected
	1.58355e-47	Probability of fit		8.74528e-48	Probability of fit
	0	0		0	0
	User specifies			User specifies
	FALSE	% out		FALSE	% out
	FALSE	% in		FALSE	% in
	1	Sigma level		1	Sigma level
	FALSE	Can reject		FALSE	Can reject
	FALSE	Const. ext. err		FALSE	Const. ext. err
T2C.1.1	0.00202857	1.86e-07	no	7.22257	0.0915947
T2C.10.1	0.00202874	2.52e-07	no	7.30345	0.123995
T2C.11.1	0.00202875	2.32e-07	no	7.30968	0.114431
T2C.12.1	0.00202932	3e-07	no	7.59391	0.147957
T2C.13.1	0.00202933	2.02e-07	no	7.5972	0.0993034
T2C.14.1	0.00203031	2.17e-07	no	8.07833	0.106698
T2C.15.1	0.00202991	1.89e-07	no	7.88107	0.093256
T2C.16.1	0.00202944	1.92e-07	no	7.6531	0.094817
T2C.17.1	0.00202917	2.28e-07	no	7.5164	0.112556
T2C.18.1	0.00202897	2.13e-07	no	7.4172	0.104912
T2C.19.1	0.00202937	1.39e-07	no	7.61876	0.0683937
T2C.2.1	0.00202815	2.13e-07	no	7.0154	0.104878
T2C.20.1	0.00203019	3.19e-07	no	8.02367	0.156969
T2C.3.1	0.0020275	4.09e-07	no	6.69155	0.201877
T2C.4.1	0.00202889	1.4e-07	no	7.37744	0.0691614
T2C.5.1	0.0020285	1.52e-07	no	7.18868	0.0750813
T2C.6.1	0.00202943	2.45e-07	no	7.64717	0.120556
T2C.7.1	0.00202987	3.12e-07	no	7.86528	0.153686
T2C.8.1	0.00202923	2.08e-07	no	7.54784	0.102396
T2C.9.1	0.00202898	1.58e-07	no	7.42461	0.0778169
T2U.1.1	0.00203012	1.62e-07	no	7.98828	0.0799101
	0.00202919	Wtd Mean (from internal errs)		7.52539	Wtd Mean (from internal errs)
	2.72608e-07	95%-conf. err. of mean		0.134611	95%-conf. err. of mean
	9.02802	MSWD		9.06196	MSWD
	0	rejected		0	rejected
	7.54096e-28	Probability of fit		5.5529e-28	Probability of fit
	0	0		0	0
	User specifies			User specifies
	FALSE	% out		FALSE	% out
	FALSE	% in		FALSE	% in
	1	Sigma level		1	Sigma level
	FALSE	Can reject		FALSE	Can reject
	FALSE	Const. ext. err		FALSE	Const. ext. err
T2U.10.1	0.00203102	1.48e-07	no	8.43174	0.0730302
T2U.12.1	0.00203023	2.61e-07	no	8.04272	0.1287
T2U.13.1	0.00202981	1.68e-07	no	7.83284	0.082742
T2U.14.1	0.00203106	2.7e-07	no	8.45101	0.132823
T2U.15.1	0.00203087	1.55e-07	no	8.35899	0.0762178
T2U.16.1	0.00203069	1.51e-07	no	8.26785	0.0744823
T2U.17.1	0.00202995	2.18e-07	no	7.9024	0.107336
T2U.19.1	0.00203033	1.71e-07	no	8.08857	0.0840893
T2U.20.1	0.00203069	2.35e-07	no	8.27024	0.115528
T2U.21.1	0.00203069	2.15e-07	no	8.26939	0.105842
T2U.22.1	0.00203037	1.7e-07	no	8.11075	0.0836257
T2U.23.1	0.00203078	1.73e-07	no	8.31331	0.0850675
T2U.24.1	0.00203182	1.9e-07	no	8.82493	0.0937441
T2U.26.1	0.00203069	1.45e-07	no	8.26893	0.0714977
T2U.27.1	0.00203069	1.37e-07	no	8.26821	0.0672204
T2U.28.1	0.00203045	4.38e-07	no	8.15022	0.215784
T2U.3.1	0.00203003	2.63e-07	no	7.94212	0.129405
T2U.8.1	0.00202965	1.45e-07	no	7.75515	0.071626
T2U.9.1	0.00203041	1.98e-07	no	8.13114	0.0973531
	0.00203055	Wtd Mean (from internal errs)		8.19839	Wtd Mean (from internal errs)
	2.4546e-07	95%-conf. err. of mean		0.121007	95%-conf. err. of mean
	7.90681	MSWD		7.92516	MSWD
	0	rejected		0	rejected
	2.28254e-21	Probability of fit		1.9707e-21	Probability of fit
	0	0		0	0
	User specifies			User specifies
	FALSE	% out		FALSE	% out
	FALSE	% in		FALSE	% in
	1	Sigma level		1	Sigma level
	FALSE	Can reject		FALSE	Can reject
	FALSE	Const. ext. err		FALSE	Const. ext. err
TEM.1.1	0.00202885	2.87e-07	no	7.36174	0.141326
TEM.10.1	0.00203024	2.84e-07	no	8.04338	0.139987
TEM.11.1	0.0020309	1.86e-07	no	8.37394	0.0915707
TEM.12.1	0.00203076	1.81e-07	no	8.30444	0.0891382
TEM.13.1	0.00203003	2.76e-07	no	7.94391	0.135885
TEM.14.1	0.00203022	1.78e-07	no	8.03377	0.0876622
TEM.15.1	0.00203012	1.82e-07	no	7.98453	0.0898562
TEM.16.1	0.00203061	3.8e-07	no	8.22658	0.187339
TEM.17.1	0.00203086	2.98e-07	no	8.35056	0.146537
TEM.18.1	0.00203029	2.7e-07	no	8.06935	0.132861
TEM.19.1	0.00203023	2.72e-07	no	8.03945	0.133948
TEM.2.1	0.00202762	2.35e-07	no	6.75057	0.115685
TEM.20.1	0.00202924	2.5e-07	no	7.55277	0.123378
TEM.21.1	0.00203014	2.02e-07	no	7.99451	0.0993851
TEM.22.1	0.00203003	3.08e-07	no	7.94464	0.151548
TEM.23.1	0.00202971	2.82e-07	no	7.78459	0.139157
TEM.24.1	0.00203101	2.3e-07	no	8.42476	0.113125
TEM.25.1	0.00203044	2.16e-07	no	8.14207	0.106253
TEM.26.1	0.00203039	1.85e-07	no	8.11862	0.09096
TEM.27.1	0.00203056	2.25e-07	no	8.2027	0.111037
TEM.28.1	0.00203045	2.97e-07	no	8.14873	0.146157
TEM.29.1	0.00202978	3.14e-07	no	7.81712	0.154483
TEM.3.1	0.00202935	2.59e-07	no	7.60788	0.127728
TEM.30.1	0.00202999	3.28e-07	no	7.9203	0.161444
TEM.31.1	0.00203	3.43e-07	no	7.9293	0.169026
TEM.4.1	0.0020297	3.3e-07	no	7.78039	0.162388
TEM.5.1	0.00202858	2.65e-07	no	7.22654	0.130554
TEM.6.1	0.00202927	2.93e-07	no	7.56628	0.144339
TEM.7.1	0.00202907	2.24e-07	no	7.4679	0.11033
TEM.8.1	0.00203	2.8e-07	no	7.9257	0.137974
TEM.9.1	0.00202937	1.54e-07	no	7.6187	0.0758932
	0.00202997	Wtd Mean (from internal errs)		7.91124	Wtd Mean (from internal errs)
	2.77052e-07	95%-conf. err. of mean		0.136838	95%-conf. err. of mean
	9.92694	MSWD		9.98252	MSWD
	0	rejected		0	rejected
	7.15532e-46	Probability of fit		3.35929e-46	Probability of fit
	0	0		0	0
	User specifies			User specifies
	FALSE	% out		FALSE	% out
	FALSE	% in		FALSE	% in
	1	Sigma level		1	Sigma level
	FALSE	Can reject		FALSE	Can reject
	FALSE	Const. ext. err		FALSE	Const. ext. err

## Sheet: Sheet2
Title	date	time	O_AA/O_HM	2s_reject_pt_index	wStdErr1s	Date+Time	Date+Time	Date from start	background subtraction to end	bkg corr	corr ratio	cor %
915.1.1	43081	0.646713	0.0581442	5	0.000311708	43081.6	43081.6	1.64671	0.0515964	0.0152964	0.0428479	26.3076
915.10.1	43082	0.324444	0.0482272	0	0.000198324	43082.3	43082.3	2.32444	0.0471911	0.0108911	0.0373361	22.5829
915.11.1	43082	0.298808	0.0475188	1	0.000220143	43082.3	43082.3	2.29881	0.0473577	0.0110577	0.0364611	23.2703
915.12.1	43082	0.0175579	0.0499871	0	0.000371624	43082	43082	2.01756	0.0491859	0.0128859	0.0371012	25.7784
915.13.1	43082	0.273287	0.0502208	-1	0.000313414	43082.3	43082.3	2.27329	0.0475236	0.0112236	0.0389972	22.3486
915.14.1	43082	0.0431134	0.0517355	-1	0.000338331	43082	43082	2.04311	0.0490198	0.0127198	0.0390158	24.5861
915.15.1	43082	0.247731	0.0487219	5	0.000266866	43082.2	43082.2	2.24773	0.0476897	0.0113897	0.0373322	23.377
915.16.1	43082	0.196354	0.0488845	0	0.000356296	43082.2	43082.2	2.19635	0.0480237	0.0117237	0.0371608	23.9824
915.17.1	43082	0.0941667	0.0495534	5	0.000131276	43082.1	43082.1	2.09417	0.0486879	0.0123879	0.0371655	24.9991
915.18.1	43082	0.222095	0.0478454	-1	0.000331472	43082.2	43082.2	2.22209	0.0478564	0.0115564	0.036289	24.1536
915.19.1	43082	0.170706	0.0465504	-1	0.000374831	43082.2	43082.2	2.17071	0.0481904	0.0118904	0.03466	25.5431
915.2.1	43081	0.667859	0.0556572	5	0.000151072	43081.7	43081.7	1.66786	0.0514589	0.0151589	0.0404983	27.2362
915.20.1	43082	0.145185	0.0472123	0	0.000307401	43082.1	43082.1	2.14519	0.0483563	0.0120563	0.035156	25.5364
915.21.1	43082	0.34147	0.0476427	0	0.000237476	43082.3	43082.3	2.34147	0.0470804	0.0107804	0.0368623	22.6277
915.22.1	43082	0.119664	0.0451814	-1	0.000256174	43082.1	43082.1	2.11966	0.0485222	0.0122222	0.0329592	27.0514
915.23.1	43082	0.0686343	0.0476447	5	0.000242461	43082.1	43082.1	2.06863	0.0488539	0.0125539	0.0350908	26.349
915.24.1	43082	0.49647	0.0451973	5	0.000164604	43082.5	43082.5	2.49647	0.0460729	0.00977295	0.0354243	21.6229
915.25.1	43082	0.598611	0.0432259	-1	0.000310809	43082.6	43082.6	2.59861	0.045409	0.00910903	0.0341169	21.0731
915.26.1	43082	0.624144	0.045232	5	0.000185539	43082.6	43082.6	2.62414	0.0452431	0.00894307	0.036289	19.7715
915.27.1	43082	0.470972	0.0428325	0	0.000190346	43082.5	43082.5	2.47097	0.0462387	0.00993868	0.0328938	23.2036
915.28.1	43082	0.573102	0.0453175	0	0.000308115	43082.6	43082.6	2.5731	0.0455748	0.00927484	0.0360427	20.4663
915.29.1	43082	0.521968	0.0476148	-1	0.0003134	43082.5	43082.5	2.52197	0.0459072	0.00960721	0.0380076	20.1769
915.3.1	43081	0.700185	0.0564697	5	0.000205365	43081.7	43081.7	1.70019	0.0512488	0.0149488	0.0415209	26.4723
915.30.1	43082	0.547477	0.0451723	0	0.000188079	43082.5	43082.5	2.54748	0.0457414	0.0094414	0.0357309	20.9009
915.5.1	43081	0.750208	0.0528689	-1	0.000247504	43081.8	43081.8	1.75021	0.0509236	0.0146236	0.0382453	27.6602
915.6.1	43081	0.779213	0.0518466	-1	0.000381137	43081.8	43081.8	1.77921	0.0507351	0.0144351	0.0374115	27.842
915.7.1	43081	0.836458	0.0509034	-1	0.000471904	43081.8	43081.8	1.83646	0.050363	0.014063	0.0368404	27.6269
915.8.1	43081	0.940856	0.0481985	5	0.000252018	43081.9	43081.9	1.94086	0.0496844	0.0133844	0.0348141	27.7694
915.9.1	43081	0.966377	0.0478124	0	0.000143024	43082	43082	1.96638	0.0495185	0.0132185	0.0345939	27.6467
915.9.1	43081	0.991921	0.0483906	-1	0.000429302	43082	43082	1.99192	0.0493525	0.0130525	0.0353381	26.9732
91C.10.1	43080	0.996065	0.0531819	1	0.000172231	43081	43081	0.996065	0.0558256	0.0195256	0.0336563	36.7147
91C.11.1	43081	0.50147	0.0506515	0	0.000132823	43081.5	43081.5	1.50147	0.0525404	0.0162404	0.0344111	32.0631
91C.12.1	43081	0.459317	0.0522014	0	0.000196051	43081.5	43081.5	1.45932	0.0528144	0.0165144	0.035687	31.636
91C.13.1	43081	0.417187	0.05182	5	0.00022375	43081.4	43081.4	1.41719	0.0530883	0.0167883	0.0350317	32.3973
91C.14.1	43081	0.375069	0.0511888	0	0.000223143	43081.4	43081.4	1.37507	0.053362	0.017062	0.0341268	33.3316
91C.15.1	43081	0.332951	0.0535192	-1	0.000283007	43081.3	43081.3	1.33295	0.0536358	0.0173358	0.0361834	32.3918
91C.16.1	43081	0.29081	0.0523102	0	0.000177892	43081.3	43081.3	1.29081	0.0539097	0.0176097	0.0347005	33.664
91C.17.1	43081	0.206597	0.0543248	0	0.000319051	43081.2	43081.2	1.2066	0.0544571	0.0181571	0.0361677	33.4232
91C.18.1	43081	0.248704	0.0562416	5	0.000209505	43081.2	43081.2	1.2487	0.0541834	0.0178834	0.0383582	31.7975
91C.19.1	43081	0.122419	0.0540725	-1	0.000306943	43081.1	43081.1	1.12242	0.0550043	0.0187043	0.0353682	34.5911
91C.2.1	43080	0.622211	0.0590159	-1	0.000255704	43080.6	43080.6	0.622211	0.0582556	0.0219556	0.0370603	37.2029
91C.20.1	43081	0.164502	0.0575401	0	0.000270229	43081.2	43081.2	1.1645	0.0547307	0.0184307	0.0391094	32.0311
91C.21.1	43081	0.0803241	0.0535937	5	0.000147708	43081.1	43081.1	1.08032	0.0552779	0.0189779	0.0346158	35.4107
91C.22.1	43081	0.0381713	0.0551745	-1	0.000295519	43081	43081	1.03817	0.0555519	0.0192519	0.0359226	34.8927
91C.23.1	43081	0.555104	0.0522088	5	0.000190881	43081.6	43081.6	1.5551	0.0521918	0.0158918	0.036317	30.439
91C.4.1	43080	0.664352	0.0594755	-1	0.000363361	43080.7	43080.7	0.664352	0.0579817	0.0216817	0.0377938	36.4548
91C.5.1	43080	0.75272	0.0573373	-1	0.000222204	43080.8	43080.8	0.75272	0.0574073	0.0211073	0.03623	36.8125
91C.6.1	43080	0.794838	0.0544295	5	0.000289196	43080.8	43080.8	0.794838	0.0571336	0.0208336	0.0335959	38.2762
91C.7.1	43080	0.836979	0.0579719	0	0.000204578	43080.8	43080.8	0.836979	0.0568596	0.0205596	0.0374123	35.4648
91C.8.1	43080	0.953981	0.0549077	0	0.000205877	43081	43081	0.953981	0.0560991	0.0197991	0.0351086	36.0589
91U.1.1	43080	0.617535	0.0625312	0	0.000138343	43080.6	43080.6	0.617535	0.058286	0.021986	0.0405452	35.1601
91U.11.1	43081	0.075625	0.0531771	5	0.000169813	43081.1	43081.1	1.07562	0.0553084	0.0190084	0.0341687	35.7455
91U.13.1	43081	0.117731	0.0543073	0	0.000125107	43081.1	43081.1	1.11773	0.0550347	0.0187347	0.0355726	34.4976
91U.14.1	43081	0.20191	0.0531487	0	0.000211379	43081.2	43081.2	1.20191	0.0544876	0.0181876	0.0349611	34.2202
91U.16.1	43081	0.159826	0.0545081	-1	0.000273592	43081.2	43081.2	1.15983	0.0547611	0.0184611	0.036047	33.8686
91U.17.1	43081	0.328275	0.0525234	-1	0.000220347	43081.3	43081.3	1.32828	0.0536662	0.0173662	0.0351572	33.0637
91U.18.1	43081	0.286134	0.0534508	-1	0.000250935	43081.3	43081.3	1.28613	0.0539401	0.0176401	0.0358106	33.0026
91U.19.1	43081	0.244028	0.0521301	0	0.000119474	43081.2	43081.2	1.24403	0.0542138	0.0179138	0.0342162	34.3637
91U.2.1	43080	0.659664	0.0599077	0	0.000226923	43080.7	43080.7	0.659664	0.0580122	0.0217122	0.0381956	36.2427
91U.20.1	43081	0.454653	0.0527161	0	0.00016418	43081.5	43081.5	1.45465	0.0528448	0.0165448	0.0361713	31.3847
91U.21.1	43081	0.370394	0.052745	5	0.000110242	43081.4	43081.4	1.37039	0.0533924	0.0170924	0.0356526	32.4058
91U.22.1	43081	0.412523	0.0524536	-1	0.000211623	43081.4	43081.4	1.41252	0.0531186	0.0168186	0.035635	32.0638
91U.23.1	43081	0.496794	0.0488872	5	0.000176109	43081.5	43081.5	1.49679	0.0525708	0.0162708	0.0326163	33.2824
91U.24.1	43081	0.537604	0.0515053	0	0.000241988	43081.5	43081.5	1.5376	0.0523056	0.0160056	0.0354997	31.0756
91U.3.1	43080	0.748044	0.0581493	5	0.000222741	43080.7	43080.7	0.748044	0.0574377	0.0211377	0.0370115	36.3508
91U.4.1	43080	0.790162	0.0581724	-1	0.000113345	43080.8	43080.8	0.790162	0.0571639	0.0208639	0.0373085	35.8657
91U.5.1	43080	0.832303	0.0568585	5	0.000214636	43080.8	43080.8	0.832303	0.05689	0.02059	0.0362685	36.2127
91U.6.1	43080	0.949306	0.0562904	0	0.000230201	43080.9	43080.9	0.949306	0.0561295	0.0198295	0.0364609	35.2272
91U.7.1	43080	0.991389	0.0546083	-1	0.000291801	43081	43081	0.991389	0.055856	0.019556	0.0350523	35.8114
91U.9.1	43081	0.0334838	0.052781	0	0.000275222	43081	43081	1.03348	0.0555824	0.0192824	0.0334987	36.5327
FC1.10.1	43080	0.551065	0.0826128	-1	0.000358911	43080.6	43080.6	0.551065	0.0587181	0.0224181	0.0601947	27.1363
FC1.11.1	43080	0.555706	0.0900206	0	0.000267227	43080.6	43080.6	0.555706	0.0586879	0.0223879	0.0676327	24.8698
FC1.12.1	43080	0.560347	0.0884469	5	0.000204404	43080.6	43080.6	0.560347	0.0586577	0.0223577	0.0660892	25.2781
FC1.13.1	43080	0.626887	0.0886936	0	0.000191967	43080.6	43080.6	0.626887	0.0582252	0.0219252	0.0667684	24.7202
FC1.14.1	43080	0.669016	0.0747663	-1	0.000327429	43080.7	43080.7	0.669016	0.0579514	0.0216514	0.0531149	28.9588
FC1.15.1	43080	0.757384	0.0837677	-1	0.0003403	43080.8	43080.8	0.757384	0.057377	0.021077	0.0626907	25.1612
FC1.16.1	43080	0.799514	0.070181	-1	0.00049968	43080.8	43080.8	0.799514	0.0571032	0.0208032	0.0493778	29.6422
FC1.17.1	43080	0.868553	0.0883306	0	0.000263904	43080.9	43080.9	0.868553	0.0566544	0.0203544	0.0679762	23.0434
FC1.18.1	43080	0.843275	0.0755526	5	0.000350366	43080.8	43080.8	0.843275	0.0568187	0.0205187	0.0550339	27.1582
FC1.19.1	43080	0.958646	0.0611222	0	0.000134057	43081	43081	0.958646	0.0560688	0.0197688	0.0413534	32.3431
FC1.20.1	43081	0.506134	0.0894919	5	0.00022305	43081.5	43081.5	1.50613	0.0525101	0.0162101	0.0732818	18.1135
FC1.21.1	43081	0.55934	0.0513971	-1	0.000396099	43081.6	43081.6	1.55934	0.0521643	0.0158643	0.0355329	30.8661
FC1.21.2	43081	0.25338	0.0551944	0	0.000112384	43081.3	43081.3	1.25338	0.054153	0.017853	0.0373414	32.3457
FC1.22.1	43081	0.211273	0.0859028	-1	0.000483786	43081.2	43081.2	1.21127	0.0544267	0.0181267	0.067776	21.1014
FC1.23.1	43081	0.295486	0.0846964	-1	0.000548204	43081.3	43081.3	1.29549	0.0538793	0.0175793	0.0671171	20.7557
FC1.24.1	43081	0.169167	0.0587528	5	0.000132024	43081.2	43081.2	1.16917	0.0547004	0.0184004	0.0403524	31.3184
FC1.25.1	43081	0.463993	0.0640796	0	0.000119689	43081.5	43081.5	1.46399	0.052784	0.016484	0.0475956	25.7243
FC1.26.1	43081	0.337627	0.0589446	5	0.000186912	43081.3	43081.3	1.33763	0.0536054	0.0173054	0.0416392	29.3588
FC1.27.1	43081	0.127083	0.0814587	-1	0.000318302	43081.1	43081.1	1.12708	0.054974	0.018674	0.0627848	22.9244
FC1.28.1	43081	0.421852	0.0573435	5	0.000224183	43081.4	43081.4	1.42185	0.053058	0.016758	0.0405855	29.2238
FC1.29.1	43081	0.379734	0.0550115	0	0.000200669	43081.4	43081.4	1.37973	0.0533317	0.0170317	0.0379797	30.9603
FC1.30.1	43081	0.0428472	0.114121	4	0.000170563	43081	43081	1.04285	0.0555215	0.0192215	0.0948991	16.8431
FC1.31.1	43081	0.000740741	0.0654982	5	0.000238168	43081	43081	1.00074	0.0557952	0.0194952	0.046003	29.7644
FC1.32.1	43081	0.0849884	0.0735303	-1	0.00029131	43081.1	43081.1	1.08499	0.0552476	0.0189476	0.0545827	25.7684
FC1.33.1	43081	0.593345	0.0820599	-1	0.000301543	43081.6	43081.6	1.59334	0.0519433	0.0156433	0.0664166	19.0632
FC1.34.1	43081	0.576354	0.0669921	-1	0.000558517	43081.6	43081.6	1.57635	0.0520537	0.0157537	0.0512384	23.5158
FC1.35.1	43081	0.606111	0.0837438	0	0.000321352	43081.6	43081.6	1.60611	0.0518603	0.0155603	0.0681835	18.5808
FC1.9.1	43080	0.546412	0.0833068	5	0.000225738	43080.5	43080.5	0.546412	0.0587483	0.0224483	0.0608585	26.9466
MPC.1.1	43082	0.307326	0.0488032	0	0.00019883	43082.3	43082.3	2.30733	0.0473024	0.0110024	0.0378008	22.5444
MPC.10.1	43081	0.974884	0.458284	5	0.00552975	43082	43082	1.97488	0.0494633	0.0131633	0.445121	2.87229
MPC.100.2	43082	0.513484	0.0470545	5	0.000370961	43082.5	43082.5	2.51348	0.0459624	0.00966236	0.0373922	20.5344
MPC.102.2	43082	0.539005	0.0534409	0	0.000254025	43082.5	43082.5	2.539	0.0457965	0.00949647	0.0439444	17.77
MPC.11.1	43082	0.230602	0.132429	0	0.00171309	43082.2	43082.2	2.2306	0.0478011	0.0115011	0.120928	8.68472
MPC.13.1	43082	0.179317	0.0482558	-1	0.000354525	43082.2	43082.2	2.17932	0.0481344	0.0118344	0.0364214	24.5244
MPC.14.1	43082	0.128171	0.0488277	5	0.000336653	43082.1	43082.1	2.12817	0.0484669	0.0121669	0.0366608	24.918
MPC.15.1	43082	0.102662	0.177133	-1	0.0044365	43082.1	43082.1	2.10266	0.0486327	0.0123327	0.1648	6.96239
MPC.16.1	43082	0.153681	0.103864	0	0.000273882	43082.2	43082.2	2.15368	0.0483011	0.0120011	0.091863	11.5546
MPC.17.1	43082	0.000543981	0.302017	-1	0.0130903	43082	43082	2.00054	0.0492965	0.0129965	0.28902	4.30323
MPC.2.1	43082	0.479468	0.0470184	4	0.000225973	43082.5	43082.5	2.47947	0.0461835	0.00988346	0.037135	21.0204
MPC.20.1	43082	0.0516204	0.237502	0	0.00183268	43082.1	43082.1	2.05162	0.0489645	0.0126645	0.224838	5.33236
MPC.21.1	43082	0.462488	0.304301	-1	0.0197069	43082.5	43082.5	2.46249	0.0462938	0.00999383	0.294308	3.28419
MPC.25.1	43081	0.758727	18.821	-1	0.212815	43081.8	43081.8	1.75873	0.0508683	0.0145683	18.8065	0.0774043
MPC.26.1	43081	0.844954	0.0537713	-1	0.000300242	43081.8	43081.8	1.84495	0.0503078	0.0140078	0.0397635	26.0507
MPC.27.1	43081	0.949363	0.0533465	5	0.000106741	43081.9	43081.9	1.94936	0.0496291	0.0133291	0.0400174	24.986
MPC.28.2	43081	0.932269	0.0569132	0	0.000206475	43081.9	43081.9	1.93227	0.0497403	0.0134403	0.0434729	23.6154
MPC.3.1	43082	0.281794	1.44516	2	0.00572267	43082.3	43082.3	2.28179	0.0474683	0.0111683	1.43399	0.77281
MPC.36.1	43082	0.45397	0.0970571	0	0.000947992	43082.5	43082.5	2.45397	0.0463492	0.0100492	0.0870079	10.3539
MPC.4.1	43082	0.0260764	0.0946656	5	0.00789692	43082	43082	2.02608	0.0491305	0.0128305	0.0818351	13.5535
MPC.5.1	43082	0.25625	0.046159	5	0.00022228	43082.3	43082.3	2.25625	0.0476344	0.0113344	0.0348246	24.5551
MPC.50.2	43082	0.487998	0.0498345	0	0.000300772	43082.5	43082.5	2.488	0.046128	0.00982802	0.0400065	19.7213
MPC.58.2	43082	0.590139	0.0518209	4	0.000105324	43082.6	43082.6	2.59014	0.0454641	0.0091641	0.0426568	17.6842
MPC.7.1	43082	0.0771412	0.0459663	5	0.000233197	43082.1	43082.1	2.07714	0.0487986	0.0124986	0.0334677	27.1908
MPC.75.2	43082	0.564525	0.0483147	-1	0.000341699	43082.6	43082.6	2.56453	0.0456306	0.00933058	0.0389841	19.3121
MPC.8.1	43081	0.819468	0.0575772	2	0.000153644	43081.8	43081.8	1.81947	0.0504735	0.0141735	0.0434038	24.6164
MPC.9.1	43082	0.204965	2.48678	2	0.000869599	43082.2	43082.2	2.20497	0.0479677	0.0116677	2.47512	0.46919
MPC2.10.2	43082	0.61566	0.0433208	0	0.000262652	43082.6	43082.6	2.61566	0.0452982	0.00899821	0.0343226	20.7711
MPC2.2.2	43081	0.827998	0.0581865	-1	0.000326785	43081.8	43081.8	1.828	0.050418	0.014118	0.0440685	24.2634
MPC2.21.2	43081	0.957894	0.0541998	0	0.000237306	43082	43082	1.95789	0.0495737	0.0132737	0.0409261	24.4903
MPC2.25.2	43082	0.504965	0.805093	5	0.00402429	43082.5	43082.5	2.50497	0.0460177	0.00971773	0.795375	1.20703
MPC2.26.2	43082	0.530486	0.0467273	5	0.000200147	43082.5	43082.5	2.53049	0.0458518	0.00955184	0.0371755	20.4417
MPC2.27.2	43082	0.556007	0.052588	5	0.000213694	43082.6	43082.6	2.55601	0.045686	0.00938595	0.043202	17.8481
MPC2.28.2	43082	0.581632	0.0469854	0	0.000277863	43082.6	43082.6	2.58163	0.0455194	0.00921939	0.037766	19.6218
MPC2.36.2	43081	0.767234	0.061917	0	0.000310111	43081.8	43081.8	1.76723	0.050813	0.014513	0.047404	23.4394
MPC2.39.2	43082	0.264757	0.0500172	0	0.000188565	43082.3	43082.3	2.26476	0.0475791	0.0112791	0.0387381	22.5504
MPC2.42.2	43082	0.290301	0.0675779	5	0.000946619	43082.3	43082.3	2.2903	0.047413	0.011113	0.0564648	16.4448
MPC2.55.2	43082	0.315822	0.282221	5	0.00334374	43082.3	43082.3	2.31582	0.0472472	0.0109472	0.271273	3.87894
MPC2.57.2	43082	0.0601389	0.0633855	5	0.000194299	43082.1	43082.1	2.06014	0.0489091	0.0126091	0.0507764	19.8927
MPC2.59.2	43082	0.213588	0.0456297	5	0.000193674	43082.2	43082.2	2.21359	0.0479117	0.0116117	0.0340181	25.4476
MPC2.67.2	43082	0.0090625	0.0561935	-1	0.000398688	43082	43082	2.00906	0.0492411	0.0129411	0.0432524	23.0295
MPC2.72.2	43082	0.239236	0.0490059	0	0.000205806	43082.2	43082.2	2.23924	0.047745	0.011445	0.0375609	23.3543
MPC2.77.2	43082	0.162211	0.0776551	5	0.000199244	43082.2	43082.2	2.16221	0.0482456	0.0119456	0.0657095	15.3829
MPC2.78.2	43082	0.0856713	0.0518878	-1	0.000467092	43082.1	43082.1	2.08567	0.0487431	0.0124431	0.0394447	23.9808
MPC2.8.2	43082	0.60713	0.044804	-1	0.000330681	43082.6	43082.6	2.60713	0.0453537	0.00905366	0.0357503	20.2073
MPC2.80.2	43081	0.983391	0.0710806	-1	0.000420639	43082	43082	1.98339	0.049408	0.013108	0.0579726	18.441
MPC2.86.2	43082	0.111181	0.0534165	0	0.000300143	43082.1	43082.1	2.11118	0.0485773	0.0122773	0.0411392	22.9841
MPC2.88.2	43082	0.13669	0.0572503	-1	0.000276576	43082.1	43082.1	2.13669	0.0484115	0.0121115	0.0451388	21.1554
MPC2.91.2	43082	0.332963	0.05869	5	0.000193886	43082.3	43082.3	2.33296	0.0471357	0.0108357	0.0478542	18.4627
MPC2.97.2	43082	0.187847	0.0609013	0	0.000280061	43082.2	43082.2	2.18785	0.048079	0.011779	0.0491223	19.3411
MPC2.98.2	43082	0.0346181	0.0804895	5	0.000447721	43082	43082	2.03462	0.049075	0.012775	0.0677145	15.8716
MPU.1.1	43081	0.996169	0.0623009	0	0.000946394	43082	43082	1.99617	0.0493249	0.0130249	0.049276	20.9064
MPU.10.1	43081	0.970625	0.045428	5	6.9555e-05	43082	43082	1.97063	0.0494909	0.0131909	0.032237	29.037
MPU.11.1	43081	0.840706	1.08056	-1	0.00914533	43081.8	43081.8	1.84071	0.0503354	0.0140354	1.06653	1.2989
MPU.12.1	43082	0.200602	0.0867918	5	0.00108607	43082.2	43082.2	2.2006	0.0479961	0.0116961	0.0750957	13.476
MPU.13.1	43082	0.226343	0.0451778	5	0.000313356	43082.2	43082.2	2.22634	0.0478288	0.0115288	0.033649	25.5187
MPU.14.1	43082	0.251979	0.0457114	-1	0.000477296	43082.3	43082.3	2.25198	0.0476621	0.0113621	0.0343493	24.8562
MPU.16.1	43082	0.277535	0.0442126	5	0.000134029	43082.3	43082.3	2.27753	0.047496	0.011196	0.0330165	25.3232
MPU.17.1	43082	0.303056	0.0529624	5	0.000887409	43082.3	43082.3	2.30306	0.0473301	0.0110301	0.0419322	20.8264
MPU.19.1	43081	0.945104	0.0600672	0	0.000162945	43081.9	43081.9	1.9451	0.0496568	0.0133568	0.0467104	22.2365
MPU.2.1	43082	0.0218171	0.33517	0	0.00112915	43082	43082	2.02182	0.0491582	0.0128582	0.322312	3.83632
MPU.20.1	43082	0.328715	0.045801	5	0.0002562	43082.3	43082.3	2.32872	0.0471634	0.0108634	0.0349377	23.7186
MPU.21.1	43082	0.337211	0.477502	-1	0.00497245	43082.3	43082.3	2.33721	0.0471081	0.0108081	0.466694	2.26347
MPU.22.1	43082	0.449711	0.0444968	-1	0.000356358	43082.4	43082.4	2.44971	0.0463769	0.0100769	0.0344199	22.6463
MPU.22.2	43081	0.762975	0.106872	4	0.000190646	43081.8	43081.8	1.76297	0.0508407	0.0145407	0.0923312	13.6057
MPU.25.1	43082	0.500706	0.0439121	-1	0.000450825	43082.5	43082.5	2.50071	0.0460454	0.00974541	0.0341667	22.193
MPU.28.2	43082	0.458229	0.0442911	-1	0.000273526	43082.5	43082.5	2.45823	0.0463215	0.0100215	0.0342696	22.6265
MPU.3.1	43082	0.526215	0.064383	-1	0.000988333	43082.5	43082.5	2.52622	0.0458796	0.0095796	0.0548034	14.8791
MPU.31.1	43081	0.754468	0.053056	0	0.000421929	43081.8	43081.8	1.75447	0.050896	0.014596	0.03846	27.5105
MPU.32.1	43081	0.815197	0.559764	0	0.00240719	43081.8	43081.8	1.8152	0.0505012	0.0142012	0.545563	2.537
MPU.4.1	43082	0.0473495	0.0474804	0	0.000276438	43082	43082	2.04735	0.0489922	0.0126922	0.0347882	26.7315
MPU.46.1	43082	0.475208	0.0768984	5	0.000755066	43082.5	43082.5	2.47521	0.0462111	0.00991115	0.0669872	12.8886
MPU.46.2	43081	0.928021	0.0621415	5	0.000367455	43081.9	43081.9	1.92802	0.0497679	0.0134679	0.0486736	21.6729
MPU.47.2	43082	0.534734	0.238614	0	0.00521282	43082.5	43082.5	2.53473	0.0458242	0.00952423	0.22909	3.99148
MPU.5.1	43082	0.0728819	0.0510749	5	0.000385438	43082.1	43082.1	2.07288	0.0488263	0.0125263	0.0385486	24.5253
MPU.51.2	43082	0.560266	0.0422888	0	0.000273753	43082.6	43082.6	2.56027	0.0456583	0.00935827	0.0329305	22.1294
MPU.54.2	43082	0.483727	0.0425445	5	0.000119322	43082.5	43082.5	2.48373	0.0461558	0.00985578	0.0326887	23.1658
MPU.6.1	43082	0.0984028	0.102128	-1	0.000560331	43082.1	43082.1	2.0984	0.0486604	0.0123604	0.0897675	12.1028
MPU.62.2	43082	0.509225	0.0714105	-1	0.000381811	43082.5	43082.5	2.50922	0.04599	0.00969004	0.0617204	13.5695
MPU.7.1	43082	0.123912	0.0446398	5	0.000279795	43082.1	43082.1	2.12391	0.0484946	0.0121946	0.0324452	27.3177
MPU.8.1	43082	0.149421	0.0439919	5	0.000182156	43082.1	43082.1	2.14942	0.0483288	0.0120288	0.0319631	27.3432
MPU.9.1	43082	0.174954	0.0495268	0	0.000329896	43082.2	43082.2	2.17495	0.0481628	0.0118628	0.037664	23.9523
MPU2.10.2	43082	0.611389	0.0505401	0	0.000171516	43082.6	43082.6	2.61139	0.045326	0.00902597	0.0415142	17.859
MPU2.105.2	43081	0.708681	0.0593728	5	0.000251079	43081.7	43081.7	1.70868	0.0511936	0.0148936	0.0444793	25.0848
MPU2.11.2	43082	0.602859	0.0592388	-1	0.000361419	43082.6	43082.6	2.60286	0.0453814	0.00908142	0.0501574	15.3302
MPU2.19.2	43082	0.58588	0.0453841	-1	0.000349079	43082.6	43082.6	2.58588	0.0454918	0.00919178	0.0361923	20.2533
MPU2.25.2	43081	0.823738	0.059846	0	0.000319105	43081.8	43081.8	1.82374	0.0504457	0.0141457	0.0457003	23.6368
MPU2.3.2	43081	0.953623	0.0526091	0	0.0002247	43082	43082	1.95362	0.0496015	0.0133015	0.0393076	25.2836
MPU2.31.2	43082	0.551736	0.0456791	5	0.000295752	43082.6	43082.6	2.55174	0.0457137	0.00941372	0.0362654	20.6084
MPU2.32.2	43082	0.577361	0.0668075	5	0.000374971	43082.6	43082.6	2.57736	0.0455472	0.00924715	0.0575603	13.8415
MPU2.36.2	43082	0.260509	0.0453761	0	0.000228248	43082.3	43082.3	2.26051	0.0476067	0.0113067	0.0340694	24.9177
MPU2.39.2	43082	0.106921	0.0817306	0	0.000202744	43082.1	43082.1	2.10692	0.048605	0.012305	0.0694256	15.0556
MPU2.50.2	43082	0.15794	0.0617777	0	0.000388682	43082.2	43082.2	2.15794	0.0482734	0.0119734	0.0498043	19.3814
MPU2.57.2	43082	0.234873	0.0467083	0	0.00025192	43082.2	43082.2	2.23487	0.0477733	0.0114733	0.035235	24.5638
MPU2.60.2	43082	0.183588	0.0496855	0	0.00039975	43082.2	43082.2	2.18359	0.0481067	0.0118067	0.0378788	23.7628
MPU2.68.2	43082	0.0303588	0.0593616	-1	0.000213384	43082	43082	2.03036	0.0491027	0.0128027	0.0465589	21.5673
MPU2.69.2	43082	0.209329	0.0498451	0	0.000254924	43082.2	43082.2	2.20933	0.0479394	0.0116394	0.0382057	23.3511
MPU2.71.2	43081	0.655162	0.0775621	-1	0.000332603	43081.7	43081.7	1.65516	0.0515414	0.0152414	0.0623206	19.6506
MPU2.74.2	43081	0.650949	0.0859066	0	0.000536832	43081.7	43081.7	1.65095	0.0515688	0.0152688	0.0706377	17.7738
MPU2.75.2	43081	0.704421	0.0727974	5	0.000460889	43081.7	43081.7	1.70442	0.0512213	0.0149213	0.0578762	20.497
MPU2.76.2	43082	0.311574	0.0451435	0	0.000282863	43082.3	43082.3	2.31157	0.0472748	0.0109748	0.0341687	24.3109
MPU2.77.2	43081	0.676343	0.0548547	5	0.000265014	43081.7	43081.7	1.67634	0.0514038	0.0151038	0.0397509	27.5341
MPU2.80.2	43082	0.132419	0.0490219	-1	0.000383551	43082.1	43082.1	2.13242	0.0484393	0.0121393	0.0368826	24.763
MPU2.81.2	43082	0.0814005	0.0658213	5	0.000777431	43082.1	43082.1	2.0814	0.0487709	0.0124709	0.0533504	18.9466
MPU2.83.2	43081	0.659375	0.0727809	-1	0.000403279	43081.7	43081.7	1.65938	0.0515141	0.0152141	0.0575669	20.9039
MPU2.87.2	43081	0.979144	0.051215	5	0.000270342	43082	43082	1.97914	0.0494356	0.0131356	0.0380794	25.6479
MPU2.91.2	43082	0.0558681	0.0543635	-1	0.000191533	43082.1	43082.1	2.05587	0.0489369	0.0126369	0.0417266	23.2451
MPU2.92.2	43082	0.286042	0.0486651	0	0.000246202	43082.3	43082.3	2.28604	0.0474407	0.0111407	0.0375244	22.8926
MPU2.93.2	43081	0.672095	0.075594	0	0.000241214	43081.7	43081.7	1.67209	0.0514314	0.0151314	0.0604626	20.0166
MPU2.97.2	43082	0.00480324	0.0521289	-1	0.000265713	43082	43082	2.0048	0.0492688	0.0129688	0.0391601	24.8783
MPU2.98.2	43081	0.680613	0.0615638	-1	0.000276843	43081.7	43081.7	1.68061	0.051376	0.015076	0.0464878	24.4884
OGC.1.1	43080	0.603472	0.0814462	0	0.000272242	43080.6	43080.6	0.603472	0.0583774	0.0220774	0.0593688	27.1068
OGC.10.1	43081	0.0194792	0.0781205	5	0.000276773	43081	43081	1.01948	0.0556734	0.0193734	0.0587471	24.7994
OGC.11.1	43081	0.14581	0.0824915	2	0.000140977	43081.1	43081.1	1.14581	0.0548522	0.0185522	0.0639393	22.4899
OGC.12.1	43081	0.187882	0.0683462	5	0.00029455	43081.2	43081.2	1.18788	0.0545788	0.0182788	0.0500674	26.7444
OGC.13.1	43081	0.23	0.088372	-1	0.000384551	43081.2	43081.2	1.23	0.054305	0.018005	0.070367	20.3741
OGC.14.1	43081	0.272095	0.0765842	0	0.000165243	43081.3	43081.3	1.27209	0.0540314	0.0177314	0.0588528	23.1528
OGC.15.1	43081	0.314213	0.0888488	0	0.000288279	43081.3	43081.3	1.31421	0.0537576	0.0174576	0.0713911	19.6487
OGC.16.1	43081	0.356343	0.0757664	0	0.000233761	43081.4	43081.4	1.35634	0.0534838	0.0171838	0.0585826	22.6799
OGC.17.1	43081	0.398461	0.0633949	-1	0.000458294	43081.4	43081.4	1.39846	0.05321	0.01691	0.0464849	26.6741
OGC.18.1	43081	0.440602	0.0777279	0	0.00022459	43081.4	43081.4	1.4406	0.0529361	0.0166361	0.0610919	21.403
OGC.19.1	43081	0.482743	0.0758926	0	0.000181423	43081.5	43081.5	1.48274	0.0526622	0.0163622	0.0595305	21.5596
OGC.2.1	43080	0.645625	0.0857726	5	0.000239601	43080.6	43080.6	0.645625	0.0581034	0.0218034	0.0639692	25.42
OGC.20.1	43081	0.524873	0.0801904	5	0.000318804	43081.5	43081.5	1.52487	0.0523883	0.0160883	0.0641021	20.0627
OGC.3.1	43080	0.733993	0.0897997	-1	0.000316795	43080.7	43080.7	0.733993	0.057529	0.021229	0.0685706	23.6404
OGC.4.1	43080	0.776123	0.0717268	-1	0.000333584	43080.8	43080.8	0.776123	0.0572552	0.0209552	0.0507716	29.2153
OGC.5.1	43080	0.818252	0.0791846	-1	0.000400681	43080.8	43080.8	0.818252	0.0569814	0.0206814	0.0585032	26.1179
OGC.6.1	43080	0.935266	0.0849552	-1	0.000343521	43080.9	43080.9	0.935266	0.0562208	0.0199208	0.0650344	23.4486
OGC.7.1	43081	0.103715	0.0770236	-1	0.000461336	43081.1	43081.1	1.10372	0.0551259	0.0188259	0.0581977	24.4417
OGC.8.1	43081	0.0615856	0.0650603	0	0.000162229	43081.1	43081.1	1.06159	0.0553997	0.0190997	0.0459606	29.3569
OGC.9.1	43080	0.977373	0.0656903	0	0.000238335	43081	43081	0.977373	0.0559471	0.0196471	0.0460433	29.9086
OGU.1.1	43080	0.598785	0.11232	5	0.000459876	43080.6	43080.6	0.598785	0.0584079	0.0221079	0.090212	19.683
OGU.10.1	43081	0.0568981	0.117831	5	0.000391577	43081.1	43081.1	1.0569	0.0554302	0.0191302	0.0987007	16.2353
OGU.11.1	43081	0.0990509	0.109679	0	0.000426109	43081.1	43081.1	1.09905	0.0551562	0.0188562	0.0908225	17.1922
OGU.12.1	43081	0.141134	0.124351	-1	0.000199842	43081.1	43081.1	1.14113	0.0548826	0.0185826	0.105768	14.9437
OGU.13.1	43081	0.183218	0.124867	-1	0.000405438	43081.2	43081.2	1.18322	0.0546091	0.0183091	0.106558	14.6629
OGU.14.1	43081	0.580613	0.130413	0	0.000257028	43081.6	43081.6	1.58061	0.052026	0.015726	0.114687	12.0586
OGU.15.1	43081	0.225312	0.129821	5	0.000134258	43081.2	43081.2	1.22531	0.0543355	0.0180355	0.111786	13.8925
OGU.16.1	43081	0.267419	0.12954	0	0.000472323	43081.3	43081.3	1.26742	0.0540618	0.0177618	0.111778	13.7114
OGU.17.1	43081	0.309537	0.110684	-1	0.000375641	43081.3	43081.3	1.30954	0.053788	0.017488	0.0931964	15.7999
OGU.18.1	43081	0.351655	0.130068	0	0.000361451	43081.4	43081.4	1.35166	0.0535142	0.0172142	0.112854	13.2348
OGU.19.1	43081	0.393785	0.12939	-1	0.00043696	43081.4	43081.4	1.39378	0.0532404	0.0169404	0.112449	13.0926
OGU.2.1	43081	0.563611	0.103555	0	0.000473295	43081.6	43081.6	1.56361	0.0521365	0.0158365	0.0877188	15.2928
OGU.20.1	43081	0.435914	0.125333	-1	0.000426905	43081.4	43081.4	1.43591	0.0529666	0.0166666	0.108666	13.2978
OGU.21.1	43081	0.478044	0.118065	-1	0.000341395	43081.5	43081.5	1.47804	0.0526927	0.0163927	0.101672	13.8845
OGU.22.1	43081	0.520185	0.111518	-1	0.000335384	43081.5	43081.5	1.52019	0.0524188	0.0161188	0.0953987	14.454
OGU.3.1	43080	0.640937	0.0947572	5	0.000344982	43080.6	43080.6	0.640938	0.0581339	0.0218339	0.0729233	23.042
OGU.35.1	43081	0.589086	0.10692	-1	0.00085647	43081.6	43081.6	1.58909	0.0519709	0.0156709	0.0912492	14.6567
OGU.36.1	43081	0.572095	0.276342	-1	0.0012612	43081.6	43081.6	1.57209	0.0520814	0.0157814	0.260561	5.71082
OGU.4.1	43080	0.729317	0.0973732	5	0.000234232	43080.7	43080.7	0.729317	0.0575594	0.0212594	0.0761137	21.8329
OGU.40.1	43081	0.597604	0.0850242	0	0.000238663	43081.6	43081.6	1.5976	0.0519156	0.0156156	0.0694086	18.366
OGU.5.1	43080	0.771447	0.12663	5	0.000573924	43080.8	43080.8	0.771447	0.0572856	0.0209856	0.105644	16.5724
OGU.6.1	43080	0.813576	0.111816	-1	0.000295348	43080.8	43080.8	0.813576	0.0570118	0.0207118	0.0911046	18.523
OGU.7.1	43080	0.93059	0.12154	-1	0.000323695	43080.9	43080.9	0.93059	0.0562512	0.0199512	0.101589	16.4153
OGU.8.1	43080	0.972685	0.163408	5	0.000719812	43081	43081	0.972685	0.0559775	0.0196775	0.14373	12.042
OGU.9.1	43081	0.0147917	0.106894	0	0.000219984	43081	43081	1.01479	0.0557039	0.0194039	0.0874906	18.1524
QGC.1.1	43080	0.612847	0.0790528	-1	0.000300521	43080.6	43080.6	0.612847	0.0583165	0.0220165	0.0570363	27.8503
QGC.10.1	43081	0.239352	0.0677176	5	0.000155372	43081.2	43081.2	1.23935	0.0542442	0.0179442	0.0497734	26.4986
QGC.11.1	43081	0.28147	0.0702942	-1	0.000276163	43081.3	43081.3	1.28147	0.0539704	0.0176704	0.0526238	25.1378
QGC.12.1	43081	0.3236	0.0653496	5	0.000171144	43081.3	43081.3	1.3236	0.0536966	0.0173966	0.047953	26.6208
QGC.13.1	43081	0.365729	0.0618903	5	0.000228513	43081.4	43081.4	1.36573	0.0534228	0.0171228	0.0447676	27.6663
QGC.14.1	43081	0.407847	0.0575688	5	0.000172491	43081.4	43081.4	1.40785	0.053149	0.016849	0.0407198	29.2676
QGC.15.1	43081	0.449977	0.0560422	-1	0.000207488	43081.4	43081.4	1.44998	0.0528752	0.0165752	0.0394671	29.5762
QGC.16.1	43081	0.492118	0.0587309	5	0.000277374	43081.5	43081.5	1.49212	0.0526012	0.0163012	0.0424297	27.7558
QGC.17.1	43081	0.533356	0.0561806	0	0.000248186	43081.5	43081.5	1.53336	0.0523332	0.0160332	0.0401474	28.5387
QGC.18.1	43081	0.15515	0.0685569	-1	0.000460246	43081.2	43081.2	1.15515	0.0547915	0.0184915	0.0500654	26.9725
QGC.19.1	43080	0.986713	0.0575903	-1	0.000326274	43081	43081	0.986713	0.0558864	0.0195864	0.038004	34.0098
QGC.2.1	43080	0.654977	0.0632993	5	0.000334468	43080.7	43080.7	0.654977	0.0580427	0.0217427	0.0415566	34.349
QGC.20.1	43081	0.0288079	0.0560806	5	0.000212754	43081	43081	1.02881	0.0556127	0.0193127	0.0367679	34.4375
QGC.3.1	43080	0.743356	0.0582153	5	0.000177349	43080.7	43080.7	0.743356	0.0574682	0.0211682	0.0370471	36.3619
QGC.4.1	43080	0.785475	0.0598907	5	0.000261441	43080.8	43080.8	0.785475	0.0571944	0.0208944	0.0389962	34.8876
QGC.5.1	43080	0.827616	0.0586508	5	0.000255239	43080.8	43080.8	0.827616	0.0569205	0.0206205	0.0380303	35.1581
QGC.6.1	43080	0.944618	0.0697252	5	0.00031311	43080.9	43080.9	0.944618	0.05616	0.01986	0.0498652	28.4832
QGC.7.1	43081	0.0709375	0.0578422	0	0.000128572	43081.1	43081.1	1.07094	0.0553389	0.0190389	0.0388033	32.9152
QGC.8.1	43081	0.113056	0.0684305	-1	0.000345358	43081.1	43081.1	1.11306	0.0550651	0.0187651	0.0496653	27.4222
QGC.9.1	43081	0.197234	0.0671827	-1	0.00027688	43081.2	43081.2	1.19723	0.054518	0.018218	0.0489648	27.1171
QGU.1.1	43080	0.60816	0.066452	5	0.000170308	43080.6	43080.6	0.60816	0.058347	0.022047	0.044405	33.1773
QGU.10.1	43081	0.36103	0.0555472	-1	0.000331824	43081.4	43081.4	1.36103	0.0534533	0.0171533	0.0383939	30.8806
QGU.11.1	43081	0.60184	0.0567669	0	0.000198442	43081.6	43081.6	1.60184	0.051888	0.015588	0.0411788	27.4597
QGU.12.1	43081	0.318912	0.0511536	-1	0.000193313	43081.3	43081.3	1.31891	0.0537271	0.0174271	0.0337265	34.0681
QGU.13.1	43081	0.276782	0.057501	-1	0.000356226	43081.3	43081.3	1.27678	0.0540009	0.0177009	0.0398001	30.7836
QGU.14.1	43081	0.234676	0.0543367	0	0.000268951	43081.2	43081.2	1.23468	0.0542746	0.0179746	0.036362	33.0801
QGU.15.1	43081	0.192558	0.0563704	0	0.000205879	43081.2	43081.2	1.19256	0.0545484	0.0182484	0.0381221	32.3722
QGU.16.1	43081	0.150486	0.0557441	5	0.000125334	43081.2	43081.2	1.15049	0.0548218	0.0185218	0.0372223	33.2265
QGU.17.1	43081	0.0662616	0.060481	5	0.000185825	43081.1	43081.1	1.06626	0.0553693	0.0190693	0.0414117	31.5294
QGU.18.1	43081	0.108391	0.0549598	5	6.3293e-05	43081.1	43081.1	1.10839	0.0550955	0.0187955	0.0361643	34.1986
QGU.19.1	43081	0.0241435	0.0790439	0	0.000205441	43081	43081	1.02414	0.0556431	0.0193431	0.0597009	24.4713
QGU.2.1	43080	0.650301	0.0637643	5	0.000242327	43080.7	43080.7	0.650301	0.058073	0.021773	0.0419912	34.1461
QGU.20.1	43081	0.52912	0.0668268	0	0.000205854	43081.5	43081.5	1.52912	0.0523607	0.0160607	0.0507661	24.0333
QGU.22.1	43080	0.982037	0.054551	5	0.000314547	43081	43081	0.982037	0.0559168	0.0196168	0.0349343	35.9604
QGU.27.1	43081	0.567847	0.0754596	5	0.000232392	43081.6	43081.6	1.56785	0.052109	0.015809	0.0596506	20.9503
QGU.3.1	43080	0.738681	0.0571415	-1	0.000245054	43080.7	43080.7	0.738681	0.0574986	0.0211986	0.035943	37.0984
QGU.33.1	43081	0.58485	0.05257	5	0.000264804	43081.6	43081.6	1.58485	0.0519985	0.0156985	0.0368715	29.8621
QGU.4.1	43080	0.780799	0.0569302	-1	0.000225648	43080.8	43080.8	0.780799	0.0572248	0.0209248	0.0360054	36.7552
QGU.5.1	43080	0.82294	0.0584682	5	0.000298875	43080.8	43080.8	0.82294	0.0569509	0.0206509	0.0378173	35.3199
QGU.6.1	43080	0.939942	0.0644852	-1	0.000328872	43080.9	43080.9	0.939942	0.0561904	0.0198904	0.0445948	30.8449
QGU.7.1	43081	0.487431	0.0514256	0	0.000199226	43081.5	43081.5	1.48743	0.0526317	0.0163317	0.0350939	31.7579
QGU.8.1	43081	0.445289	0.0588106	-1	0.000189727	43081.4	43081.4	1.44529	0.0529056	0.0166056	0.042205	28.2357
QGU.9.1	43081	0.40316	0.0545181	0	0.000135671	43081.4	43081.4	1.40316	0.0531795	0.0168795	0.0376386	30.9612
T2C.1.1	43080	0.594005	0.0797158	0	0.00017169	43080.6	43080.6	0.594005	0.058439	0.022139	0.0575768	27.7724
T2C.10.1	43081	0.0943634	0.0703364	0	0.000249144	43081.1	43081.1	1.09436	0.0551866	0.0188866	0.0514497	26.8519
T2C.11.1	43081	0.136458	0.0811013	0	0.000374754	43081.1	43081.1	1.13646	0.054913	0.018613	0.0624883	22.9503
T2C.12.1	43081	0.17853	0.0735478	0	0.000303299	43081.2	43081.2	1.17853	0.0546396	0.0183396	0.0552082	24.9356
T2C.13.1	43081	0.220637	0.0632829	0	0.000147785	43081.2	43081.2	1.22064	0.0543659	0.0180659	0.045217	28.5478
T2C.14.1	43081	0.262743	0.056878	-1	0.000292759	43081.3	43081.3	1.26274	0.0540922	0.0177922	0.0390858	31.2813
T2C.15.1	43081	0.30485	0.0790974	0	0.000388622	43081.3	43081.3	1.30485	0.0538185	0.0175185	0.0615789	22.148
T2C.16.1	43081	0.346979	0.0681005	0	0.000347535	43081.3	43081.3	1.34698	0.0535446	0.0172446	0.0508559	25.3223
T2C.17.1	43081	0.389097	0.0683778	0	0.000327803	43081.4	43081.4	1.3891	0.0532709	0.0169709	0.0514069	24.8193
T2C.18.1	43081	0.431227	0.0682373	0	0.000267569	43081.4	43081.4	1.43123	0.052997	0.016697	0.0515402	24.4691
T2C.19.1	43081	0.473345	0.0658655	-1	0.000450983	43081.5	43081.5	1.47334	0.0527233	0.0164233	0.0494423	24.9345
T2C.2.1	43080	0.63625	0.0740392	0	0.000341536	43080.6	43080.6	0.63625	0.0581644	0.0218644	0.0521748	29.5308
T2C.20.1	43081	0.515486	0.0613011	0	0.00021367	43081.5	43081.5	1.51549	0.0524493	0.0161493	0.0451517	26.3443
T2C.3.1	43080	0.72463	0.0619976	5	0.000229228	43080.7	43080.7	0.72463	0.0575899	0.0212899	0.0407077	34.3399
T2C.4.1	43080	0.766759	0.0592175	-1	0.000265358	43080.8	43080.8	0.766759	0.0573161	0.0210161	0.0382014	35.4896
T2C.5.1	43080	0.808889	0.0571733	5	0.000201198	43080.8	43080.8	0.808889	0.0570422	0.0207422	0.0364311	36.2795
T2C.6.1	43080	0.925914	0.0614051	0	0.000160412	43080.9	43080.9	0.925914	0.0562816	0.0199816	0.0414236	32.5405
T2C.7.1	43080	0.968009	0.0676544	-1	0.000343619	43081	43081	0.968009	0.0560079	0.0197079	0.0479464	29.1303
T2C.8.1	43081	0.0101042	0.0614571	0	0.000268553	43081	43081	1.0101	0.0557343	0.0194343	0.0420228	31.6226
T2C.9.1	43081	0.0522106	0.0731501	0	0.00047849	43081.1	43081.1	1.05221	0.0554606	0.0191606	0.0539895	26.1936
T2U.1.1	43080	0.589317	0.113958	-1	0.000359806	43080.6	43080.6	0.589317	0.0584694	0.0221694	0.0917883	19.4541
T2U.10.1	43080	0.804201	0.0860579	-1	0.000373903	43080.8	43080.8	0.804201	0.0570727	0.0207727	0.0652853	24.138
T2U.12.1	43080	0.873229	0.0948875	0	0.000388084	43080.9	43080.9	0.873229	0.056624	0.020324	0.0745635	21.4191
T2U.13.1	43080	0.963333	0.114895	5	0.00109424	43081	43081	0.963333	0.0560383	0.0197383	0.0951565	17.1795
T2U.14.1	43081	0.00542824	0.0676551	5	0.000145032	43081	43081	1.00543	0.0557647	0.0194647	0.0481904	28.7705
T2U.15.1	43081	0.0475347	0.0938464	0	0.000265065	43081	43081	1.04753	0.055491	0.019191	0.0746554	20.4494
T2U.16.1	43081	0.0896875	0.0668315	-1	0.000320783	43081.1	43081.1	1.08969	0.055217	0.018917	0.0479145	28.3056
T2U.17.1	43081	0.131771	0.088837	0	0.00031392	43081.1	43081.1	1.13177	0.0549435	0.0186435	0.0701935	20.9862
T2U.19.1	43081	0.173854	0.0937691	-1	0.000347505	43081.2	43081.2	1.17385	0.0546699	0.0183699	0.0753992	19.5906
T2U.20.1	43081	0.215949	0.0687623	-1	0.000319612	43081.2	43081.2	1.21595	0.0543963	0.0180963	0.050666	26.3172
T2U.21.1	43081	0.258056	0.0973878	-1	0.000405474	43081.3	43081.3	1.25806	0.0541226	0.0178226	0.0795652	18.3007
T2U.22.1	43081	0.300162	0.0720183	-1	0.000283487	43081.3	43081.3	1.30016	0.0538489	0.0175489	0.0544694	24.3673
T2U.23.1	43081	0.342303	0.0717398	-1	0.000254681	43081.3	43081.3	1.3423	0.053575	0.017275	0.0544648	24.0801
T2U.24.1	43081	0.384421	0.0870555	5	0.000329487	43081.4	43081.4	1.38442	0.0533013	0.0170013	0.0700542	19.5292
T2U.26.1	43081	0.426539	0.110522	-1	0.000345199	43081.4	43081.4	1.42654	0.0530275	0.0167275	0.0937945	15.135
T2U.27.1	43081	0.468669	0.0739248	0	0.000159574	43081.5	43081.5	1.46867	0.0527537	0.0164537	0.0574711	22.2573
T2U.28.1	43081	0.51081	0.0550498	5	9.7024e-05	43081.5	43081.5	1.51081	0.0524797	0.0161797	0.03887	29.3911
T2U.3.1	43080	0.631574	0.0731092	5	0.000348809	43080.6	43080.6	0.631574	0.0581948	0.0218948	0.0512145	29.948
T2U.8.1	43080	0.719942	0.0886733	5	0.00030669	43080.7	43080.7	0.719942	0.0576204	0.0213204	0.067353	24.0437
T2U.9.1	43080	0.762072	0.0750404	-1	0.000298585	43080.8	43080.8	0.762072	0.0573465	0.0210465	0.0539938	28.0469
TEM.1.1	43081	0.642488	0.0875397	0	0.000280184	43081.6	43081.6	1.64249	0.0516238	0.0153238	0.0722159	17.505
TEM.10.1	43082	0.320174	0.0738206	-1	0.000368707	43082.3	43082.3	2.32017	0.0472189	0.0109189	0.0629018	14.7911
TEM.11.1	43082	0.397014	0.0736453	0	0.00031412	43082.4	43082.4	2.39701	0.0467194	0.0104194	0.0632259	14.1481
TEM.12.1	43082	0.269028	0.0660955	-1	0.000332937	43082.3	43082.3	2.26903	0.0475513	0.0112513	0.0548442	17.0228
TEM.13.1	43082	0.166447	0.0789194	-1	0.000317677	43082.2	43082.2	2.16645	0.0482181	0.0119181	0.0670013	15.1016
TEM.14.1	43082	0.294549	0.0609399	5	0.000279149	43082.3	43082.3	2.29455	0.0473854	0.0110854	0.0498545	18.1908
TEM.15.1	43082	0.192095	0.0684087	-1	0.000409219	43082.2	43082.2	2.19209	0.0480514	0.0117514	0.0566573	17.1782
TEM.16.1	43082	0.217847	0.0657633	0	0.000306255	43082.2	43082.2	2.21785	0.047884	0.011584	0.0541793	17.6147
TEM.17.1	43082	0.243484	0.0497574	5	0.000258796	43082.2	43082.2	2.24348	0.0477174	0.0114174	0.03834	22.9461
TEM.18.1	43082	0.140937	0.078151	0	0.000334199	43082.1	43082.1	2.14094	0.0483839	0.0120839	0.0660671	15.4623
TEM.19.1	43082	0.115417	0.0466684	0	0.000166453	43082.1	43082.1	2.11542	0.0485498	0.0122498	0.0344186	26.2486
TEM.2.1	43081	0.663623	0.121746	0	0.000407678	43081.7	43081.7	1.66362	0.0514865	0.0151865	0.10656	12.4739
TEM.20.1	43082	0.0388657	0.0721215	0	0.00057553	43082	43082	2.03887	0.0490474	0.0127474	0.0593742	17.6749
TEM.21.1	43082	0.0643866	0.0833693	0	0.000243986	43082.1	43082.1	2.06439	0.0488815	0.0125815	0.0707878	15.0913
TEM.22.1	43082	0.089919	0.0780899	5	0.000280183	43082.1	43082.1	2.08992	0.0487155	0.0124155	0.0656743	15.899
TEM.23.1	43082	0.0133218	0.0907131	4	0.000727648	43082	43082	2.01332	0.0492134	0.0129134	0.0777997	14.2354
TEM.24.1	43082	0.345706	0.0790753	5	0.000371547	43082.3	43082.3	2.34571	0.0470529	0.0107529	0.0683224	13.5983
TEM.25.1	43082	0.466736	0.0836935	0	0.000401544	43082.5	43082.5	2.46674	0.0462662	0.00996622	0.0737273	11.908
TEM.26.1	43082	0.517743	0.076321	0	0.000261826	43082.5	43082.5	2.51774	0.0459347	0.00963467	0.0666863	12.6239
TEM.27.1	43082	0.543252	0.0697275	0	0.000214353	43082.5	43082.5	2.54325	0.0457689	0.00946886	0.0602586	13.5798
TEM.28.1	43082	0.568877	0.0539907	-1	0.00033282	43082.6	43082.6	2.56888	0.0456023	0.0093023	0.0446884	17.2295
TEM.29.1	43082	0.594375	0.0784545	5	0.000272067	43082.6	43082.6	2.59438	0.0454366	0.00913656	0.069318	11.6457
TEM.3.1	43081	0.68485	0.0805065	5	0.000225515	43081.7	43081.7	1.68485	0.0513485	0.0150485	0.065458	18.6923
TEM.30.1	43082	0.619907	0.0890478	-1	0.000497684	43082.6	43082.6	2.61991	0.0452706	0.0089706	0.0800772	10.0739
TEM.31.1	43082	0.492234	0.0754874	5	0.000363272	43082.5	43082.5	2.49223	0.0461005	0.00980048	0.0656869	12.9829
TEM.4.1	43081	0.745995	0.086944	0	0.00054859	43081.7	43081.7	1.746	0.050951	0.014651	0.072293	16.8511
TEM.5.1	43081	0.774988	0.0550097	0	0.00024765	43081.8	43081.8	1.77499	0.0507626	0.0144626	0.0405471	26.291
TEM.6.1	43081	0.832234	0.0897943	0	0.000343402	43081.8	43081.8	1.83223	0.0503905	0.0140905	0.0757038	15.6919
TEM.7.1	43081	0.936516	0.0535974	-1	0.000395732	43081.9	43081.9	1.93652	0.0497126	0.0134126	0.0401848	25.0248
TEM.8.1	43081	0.962153	0.0805034	0	0.000296439	43082	43082	1.96215	0.049546	0.013246	0.0672574	16.454
TEM.9.1	43081	0.98765	0.0927404	-1	0.000490282	43082	43082	1.98765	0.0493803	0.0130803	0.0796601	14.1042

## Sheet: Sheet3
Title	date	time	MC_G_Ratio_O_HM/O_LM_EISIE_corr	wStdErr1s	ratio_permil	wStdErr1s_permil	O_AA/O_HM	wStdErr1s	corr ratio		Title
915.1.1	2017-12-12	1899-12-31 15:31:16	0.0020328	1.52e-07	9.30815	0.0747463	0.0581442	0.000311708	0.0428479		915.1.1
915.10.1	2017-12-13	1899-12-31 07:47:12	0.00203314	2.02e-07	9.4763	0.0994052	0.0482272	0.000198324	0.0373361		915.10.1
915.11.1	2017-12-13	1899-12-31 07:10:17	0.00203259	1.86e-07	9.2053	0.0914228	0.0475188	0.000220143	0.0364611		915.11.1
915.12.1	2017-12-13	1899-12-31 00:25:17	0.00203278	2.78e-07	9.30166	0.136999	0.0499871	0.000371624	0.0371012		915.12.1
915.13.1	2017-12-13	1899-12-31 06:33:32	0.00203296	3.42e-07	9.38901	0.168435	0.0502208	0.000313414	0.0389972		915.13.1
915.14.1	2017-12-13	1899-12-31 01:02:05	0.0020332	3.7e-07	9.50912	0.181951	0.0517355	0.000338331	0.0390158		915.14.1
915.15.1	2017-12-13	1899-12-31 05:56:44	0.00203347	1.84e-07	9.64034	0.0904503	0.0487219	0.000266866	0.0373322		915.15.1
915.16.1	2017-12-13	1899-12-31 04:42:45	0.00203338	1.3e-07	9.59878	0.0641596	0.0488845	0.000356296	0.0371608		915.16.1
915.17.1	2017-12-13	1899-12-31 02:15:36	0.00203305	2.96e-07	9.43463	0.145514	0.0495534	0.000131276	0.0371655		915.17.1
915.18.1	2017-12-13	1899-12-31 05:19:49	0.00203305	2.49e-07	9.43205	0.122626	0.0478454	0.000331472	0.036289		915.18.1
915.19.1	2017-12-13	1899-12-31 04:05:49	0.00203419	1.7e-07	9.99821	0.0835068	0.0465504	0.000374831	0.03466		915.19.1
915.2.1	2017-12-12	1899-12-31 16:01:43	0.0020335	2.27e-07	9.65627	0.111421	0.0556572	0.000151072	0.0404983		915.2.1
915.20.1	2017-12-13	1899-12-31 03:29:04	0.00203419	2e-07	9.99767	0.0985305	0.0472123	0.000307401	0.035156		915.20.1
915.21.1	2017-12-13	1899-12-31 08:11:43	0.00203529	4.06e-07	10.5394	0.199588	0.0476427	0.000237476	0.0368623		915.21.1
915.22.1	2017-12-13	1899-12-31 02:52:19	0.00203349	2.99e-07	9.64929	0.147258	0.0451814	0.000256174	0.0329592		915.22.1
915.23.1	2017-12-13	1899-12-31 01:38:50	0.00203449	3.39e-07	10.1443	0.166736	0.0476447	0.000242461	0.0350908		915.23.1
915.24.1	2017-12-13	1899-12-31 11:54:55	0.00203446	2.34e-07	10.1279	0.114828	0.0451973	0.000164604	0.0354243		915.24.1
915.25.1	2017-12-13	1899-12-31 14:22:00	0.00203489	3.2e-07	10.344	0.157259	0.0432259	0.000310809	0.0341169		915.25.1
915.26.1	2017-12-13	1899-12-31 14:58:46	0.00203389	3.71e-07	9.84638	0.18237	0.045232	0.000185539	0.036289		915.26.1
915.27.1	2017-12-13	1899-12-31 11:18:12	0.00203439	2.98e-07	10.096	0.146518	0.0428325	0.000190346	0.0328938		915.27.1
915.28.1	2017-12-13	1899-12-31 13:45:16	0.0020346	3.4e-07	10.1983	0.167317	0.0453175	0.000308115	0.0360427		915.28.1
915.29.1	2017-12-13	1899-12-31 12:31:38	0.00203276	1.83e-07	9.29218	0.0901409	0.0476148	0.0003134	0.0380076		915.29.1
915.3.1	2017-12-12	1899-12-31 16:48:16	0.00203471	2.85e-07	10.2555	0.140162	0.0564697	0.000205365	0.0415209		915.3.1
915.30.1	2017-12-13	1899-12-31 13:08:22	0.00203406	2.91e-07	9.93357	0.142828	0.0451723	0.000188079	0.0357309		915.30.1
915.5.1	2017-12-12	1899-12-31 18:00:18	0.00203429	2.75e-07	10.0456	0.135393	0.0528689	0.000247504	0.0382453		915.5.1
915.6.1	2017-12-12	1899-12-31 18:42:04	0.00203306	2.57e-07	9.43784	0.126199	0.0518466	0.000381137	0.0374115		915.6.1
915.7.1	2017-12-12	1899-12-31 20:04:30	0.00203299	2.83e-07	9.40468	0.139198	0.0509034	0.000471904	0.0368404		915.7.1
915.8.1	2017-12-12	1899-12-31 22:34:50	0.00203392	2.95e-07	9.865	0.144877	0.0481985	0.000252018	0.0348141		915.8.1
915.9.1	2017-12-12	1899-12-31 23:11:35	0.00203444	2.79e-07	10.1193	0.137337	0.0478124	0.000143024	0.0345939		915.9.1
915.9.1	2017-12-12	1899-12-31 23:48:22	0.00203252	3.38e-07	9.17159	0.166259	0.0483906	0.000429302	0.0353381		915.9.1
91C.10.1	2017-12-11	1899-12-31 23:54:20	0.00203427	2.76e-07	10.0379	0.135496	0.0531819	0.000172231	0.0336563		91C.10.1
91C.11.1	2017-12-12	1899-12-31 12:02:07	0.00203443	2.07e-07	10.1155	0.101829	0.0506515	0.000132823	0.0344111		91C.11.1
91C.12.1	2017-12-12	1899-12-31 11:01:25	0.00203426	2.82e-07	10.0328	0.138779	0.0522014	0.000196051	0.035687		91C.12.1
91C.13.1	2017-12-12	1899-12-31 10:00:45	0.00203461	2.54e-07	10.2047	0.124868	0.05182	0.00022375	0.0350317		91C.13.1
91C.14.1	2017-12-12	1899-12-31 09:00:06	0.0020346	1.85e-07	10.1971	0.0906875	0.0511888	0.000223143	0.0341268		91C.14.1
91C.15.1	2017-12-12	1899-12-31 07:59:27	0.00203526	2.34e-07	10.5264	0.114895	0.0535192	0.000283007	0.0361834		91C.15.1
91C.16.1	2017-12-12	1899-12-31 06:58:46	0.00203453	1.96e-07	10.1622	0.0964671	0.0523102	0.000177892	0.0347005		91C.16.1
91C.17.1	2017-12-12	1899-12-31 04:57:30	0.00203481	1.72e-07	10.3007	0.0846868	0.0543248	0.000319051	0.0361677		91C.17.1
91C.18.1	2017-12-12	1899-12-31 05:58:08	0.00203443	3.11e-07	10.1171	0.152925	0.0562416	0.000209505	0.0383582		91C.18.1
91C.19.1	2017-12-12	1899-12-31 02:56:17	0.00203423	2.44e-07	10.0145	0.11994	0.0540725	0.000306943	0.0353682		91C.19.1
91C.2.1	2017-12-11	1899-12-31 14:55:59	0.00203387	1.83e-07	9.8373	0.0901523	0.0590159	0.000255704	0.0370603		91C.2.1
91C.20.1	2017-12-12	1899-12-31 03:56:53	0.00203466	2.91e-07	10.2267	0.142777	0.0575401	0.000270229	0.0391094		91C.20.1
91C.21.1	2017-12-12	1899-12-31 01:55:40	0.0020344	2.5e-07	10.1018	0.122699	0.0535937	0.000147708	0.0346158		91C.21.1
91C.22.1	2017-12-12	1899-12-31 00:54:58	0.00203407	1.91e-07	9.93597	0.0940876	0.0551745	0.000295519	0.0359226		91C.22.1
91C.23.1	2017-12-12	1899-12-31 13:19:21	0.00203257	4.98e-07	9.19828	0.245013	0.0522088	0.000190881	0.036317		91C.23.1
91C.4.1	2017-12-11	1899-12-31 15:56:40	0.00203332	1.59e-07	9.56619	0.078401	0.0594755	0.000363361	0.0377938		91C.4.1
91C.5.1	2017-12-11	1899-12-31 18:03:55	0.00203384	1.74e-07	9.82331	0.0854979	0.0573373	0.000222204	0.03623		91C.5.1
91C.6.1	2017-12-11	1899-12-31 19:04:34	0.00203355	1.89e-07	9.68212	0.093089	0.0544295	0.000289196	0.0335959		91C.6.1
91C.7.1	2017-12-11	1899-12-31 20:05:15	0.0020333	1.71e-07	9.55555	0.0842669	0.0579719	0.000204578	0.0374123		91C.7.1
91C.8.1	2017-12-11	1899-12-31 22:53:44	0.00203383	1.53e-07	9.81756	0.0753275	0.0549077	0.000205877	0.0351086		91C.8.1
91U.1.1	2017-12-11	1899-12-31 14:49:15	0.002035	2.69e-07	10.3942	0.132167	0.0625312	0.000138343	0.0405452		91U.1.1
91U.11.1	2017-12-12	1899-12-31 01:48:54	0.00203419	2.69e-07	9.99709	0.132201	0.0531771	0.000169813	0.0341687		91U.11.1
91U.13.1	2017-12-12	1899-12-31 02:49:32	0.00203452	2.18e-07	10.1564	0.107354	0.0543073	0.000125107	0.0355726		91U.13.1
91U.14.1	2017-12-12	1899-12-31 04:50:45	0.0020349	1.1e-07	10.3484	0.0538601	0.0531487	0.000211379	0.0349611		91U.14.1
91U.16.1	2017-12-12	1899-12-31 03:50:09	0.00203402	1.65e-07	9.91443	0.0812517	0.0545081	0.000273592	0.036047		91U.16.1
91U.17.1	2017-12-12	1899-12-31 07:52:43	0.00203451	1.47e-07	10.1561	0.072141	0.0525234	0.000220347	0.0351572		91U.17.1
91U.18.1	2017-12-12	1899-12-31 06:52:02	0.00203486	1.93e-07	10.3283	0.0946437	0.0534508	0.000250935	0.0358106		91U.18.1
91U.19.1	2017-12-12	1899-12-31 05:51:24	0.00203477	1.49e-07	10.2807	0.0730274	0.0521301	0.000119474	0.0342162		91U.19.1
91U.2.1	2017-12-11	1899-12-31 15:49:55	0.00203418	1.78e-07	9.98872	0.0873729	0.0599077	0.000226923	0.0381956		91U.2.1
91U.20.1	2017-12-12	1899-12-31 10:54:42	0.00203365	1.55e-07	9.72877	0.0762473	0.0527161	0.00016418	0.0361713		91U.20.1
91U.21.1	2017-12-12	1899-12-31 08:53:22	0.00203567	1.78e-07	10.729	0.0876268	0.052745	0.000110242	0.0356526		91U.21.1
91U.22.1	2017-12-12	1899-12-31 09:54:02	0.00203434	1.51e-07	10.0705	0.0743567	0.0524536	0.000211623	0.035635		91U.22.1
91U.23.1	2017-12-12	1899-12-31 11:55:23	0.00203535	2.66e-07	10.567	0.130724	0.0488872	0.000176109	0.0326163		91U.23.1
91U.24.1	2017-12-12	1899-12-31 12:54:09	0.00203487	6.33e-07	10.3336	0.310856	0.0515053	0.000241988	0.0354997		91U.24.1
91U.3.1	2017-12-11	1899-12-31 17:57:11	0.00203318	1.71e-07	9.496	0.0842386	0.0581493	0.000222741	0.0370115		91U.3.1
91U.4.1	2017-12-11	1899-12-31 18:57:50	0.00203435	1.76e-07	10.0747	0.0863044	0.0581724	0.000113345	0.0373085		91U.4.1
91U.5.1	2017-12-11	1899-12-31 19:58:31	0.00203527	1.4e-07	10.5273	0.0686333	0.0568585	0.000214636	0.0362685		91U.5.1
91U.6.1	2017-12-11	1899-12-31 22:47:00	0.00203452	1.1e-07	10.1599	0.0540101	0.0562904	0.000230201	0.0364609		91U.6.1
91U.7.1	2017-12-11	1899-12-31 23:47:36	0.00203469	2.5e-07	10.2429	0.122925	0.0546083	0.000291801	0.0350523		91U.7.1
91U.9.1	2017-12-12	1899-12-31 00:48:13	0.00203426	1.97e-07	10.0288	0.096634	0.052781	0.000275222	0.0334987		91U.9.1
FC1.10.1	2017-12-11	1899-12-31 13:13:32	0.00202499	1.44e-07	5.45493	0.0709449	0.0826128	0.000358911	0.0601947		FC1.10.1
FC1.11.1	2017-12-11	1899-12-31 13:20:13	0.00202542	1.83e-07	5.66435	0.0901761	0.0900206	0.000267227	0.0676327		FC1.11.1
FC1.12.1	2017-12-11	1899-12-31 13:26:54	0.00202582	1.94e-07	5.8627	0.0955591	0.0884469	0.000204404	0.0660892		FC1.12.1
FC1.13.1	2017-12-11	1899-12-31 15:02:43	0.00202476	1.51e-07	5.34097	0.0747171	0.0886936	0.000191967	0.0667684		FC1.13.1
FC1.14.1	2017-12-11	1899-12-31 16:03:23	0.00202443	1.88e-07	5.17561	0.0927122	0.0747663	0.000327429	0.0531149		FC1.14.1
FC1.15.1	2017-12-11	1899-12-31 18:10:38	0.00202618	2.18e-07	6.0399	0.107386	0.0837677	0.0003403	0.0626907		FC1.15.1
FC1.16.1	2017-12-11	1899-12-31 19:11:18	0.00202537	1.82e-07	5.63924	0.0897355	0.070181	0.00049968	0.0493778		FC1.16.1
FC1.17.1	2017-12-11	1899-12-31 20:50:43	0.00202477	1.52e-07	5.34584	0.0752567	0.0883306	0.000263904	0.0679762		FC1.17.1
FC1.18.1	2017-12-11	1899-12-31 20:14:19	0.00202493	2.02e-07	5.4247	0.0997219	0.0755526	0.000350366	0.0550339		FC1.18.1
FC1.19.1	2017-12-11	1899-12-31 23:00:27	0.00202565	1.85e-07	5.78213	0.0914088	0.0611222	0.000134057	0.0413534		FC1.19.1
FC1.20.1	2017-12-12	1899-12-31 12:08:50	0.0020245	2.75e-07	5.21429	0.135799	0.0894919	0.00022305	0.0732818		FC1.20.1
FC1.21.1	2017-12-12	1899-12-31 13:25:27	0.00202538	9.37e-07	5.64571	0.462632	0.0513971	0.000396099	0.0355329		FC1.21.1
FC1.21.2	2017-12-12	1899-12-31 06:04:52	0.00202451	2.29e-07	5.21818	0.113156	0.0551944	0.000112384	0.0373414		FC1.21.2
FC1.22.1	2017-12-12	1899-12-31 05:04:14	0.00202489	1.78e-07	5.40356	0.0878522	0.0859028	0.000483786	0.067776		FC1.22.1
FC1.23.1	2017-12-12	1899-12-31 07:05:30	0.0020259	3.25e-07	5.90236	0.160446	0.0846964	0.000548204	0.0671171		FC1.23.1
FC1.24.1	2017-12-12	1899-12-31 04:03:36	0.00202565	1.93e-07	5.78069	0.0954329	0.0587528	0.000132024	0.0403524		FC1.24.1
FC1.25.1	2017-12-12	1899-12-31 11:08:09	0.00202659	1.58e-07	6.24577	0.078128	0.0640796	0.000119689	0.0475956		FC1.25.1
FC1.26.1	2017-12-12	1899-12-31 08:06:11	0.00202556	3.91e-07	5.73512	0.193084	0.0589446	0.000186912	0.0416392		FC1.26.1
FC1.27.1	2017-12-12	1899-12-31 03:03:00	0.00202607	2.85e-07	5.98856	0.140625	0.0814587	0.000318302	0.0627848		FC1.27.1
FC1.28.1	2017-12-12	1899-12-31 10:07:28	0.0020253	2.38e-07	5.60592	0.11732	0.0573435	0.000224183	0.0405855		FC1.28.1
FC1.29.1	2017-12-12	1899-12-31 09:06:49	0.00202553	2.75e-07	5.72209	0.135657	0.0550115	0.000200669	0.0379797		FC1.29.1
FC1.30.1	2017-12-12	1899-12-31 01:01:42	0.00202206	7.41e-07	4.00421	0.366281	0.114121	0.000170563	0.0948991		FC1.30.1
FC1.31.1	2017-12-12	1899-12-31 00:01:04	0.00202583	1.74e-07	5.86614	0.0860918	0.0654982	0.000238168	0.046003		FC1.31.1
FC1.32.1	2017-12-12	1899-12-31 02:02:23	0.00202436	1.39e-07	5.14364	0.0685416	0.0735303	0.00029131	0.0545827		FC1.32.1
FC1.33.1	2017-12-12	1899-12-31 14:14:25	0.00202541	2.21e-07	5.6616	0.109022	0.0820599	0.000301543	0.0664166		FC1.33.1
FC1.34.1	2017-12-12	1899-12-31 13:49:57	0.00202539	2.84e-07	5.65258	0.14008	0.0669921	0.000558517	0.0512384		FC1.34.1
FC1.35.1	2017-12-12	1899-12-31 14:32:48	0.00202475	1.78e-07	5.33378	0.0881572	0.0837438	0.000321352	0.0681835		FC1.35.1
FC1.9.1	2017-12-11	1899-12-31 13:06:50	0.00202613	3e-07	6.0149	0.148175	0.0833068	0.000225738	0.0608585		FC1.9.1
MPC.1.1	2017-12-13	1899-12-31 07:22:33	0.00203506	3.59e-07	10.4267	0.176536	0.0488032	0.00019883	0.0378008		MPC.1.1
MPC.10.1	2017-12-12	1899-12-31 23:23:50	0.00203079	3.55e-07	8.31859	0.174946	0.458284	0.00552975	0.445121		MPC.10.1
MPC.11.1	2017-12-13	1899-12-31 05:32:04	0.00203284	2.59e-07	9.33161	0.12728	0.132429	0.00171309	0.120928		MPC.11.1
MPC.13.1	2017-12-13	1899-12-31 04:18:13	0.00203323	1.35e-07	9.52189	0.066352	0.0482558	0.000354525	0.0364214		MPC.13.1
MPC.14.1	2017-12-13	1899-12-31 03:04:34	0.00203358	2.12e-07	9.69384	0.104016	0.0488277	0.000336653	0.0366608		MPC.14.1
MPC.15.1	2017-12-13	1899-12-31 02:27:50	0.00203235	9.02e-07	9.08654	0.443612	0.177133	0.0044365	0.1648		MPC.15.1
MPC.16.1	2017-12-13	1899-12-31 03:41:18	0.00203253	2.25e-07	9.17758	0.110624	0.103864	0.000273882	0.091863		MPC.16.1
MPC.17.1	2017-12-13	1899-12-31 00:00:47	0.0020312	2.92e-07	8.51927	0.143963	0.302017	0.0130903	0.28902		MPC.17.1
MPC.2.1	2017-12-13	1899-12-31 11:30:26	0.00203443	2.62e-07	10.1128	0.128538	0.0470184	0.000225973	0.037135		MPC.2.1
MPC.20.1	2017-12-13	1899-12-31 01:14:20	0.00203248	1.73e-07	9.1503	0.0848912	0.237502	0.00183268	0.224838		MPC.20.1
MPC.21.1	2017-12-13	1899-12-31 11:05:59	0.00203095	7.2e-07	8.3968	0.354487	0.304301	0.0197069	0.294308		MPC.21.1
MPC.25.1	2017-12-12	1899-12-31 18:12:34	0.0019793	1.993e-06	-17.1058	1.00671	18.821	0.212815	18.8065		MPC.25.1
MPC.26.1	2017-12-12	1899-12-31 20:16:44	0.00203294	2.22e-07	9.37811	0.109072	0.0537713	0.000300242	0.0397635		MPC.26.1
MPC.27.1	2017-12-12	1899-12-31 22:47:05	0.00203276	5.76e-07	9.2921	0.283408	0.0533465	0.000106741	0.0400174		MPC.27.1
MPC.28.2	2017-12-12	1899-12-31 22:22:28	0.00203482	2.7e-07	10.3066	0.132465	0.0569132	0.000206475	0.0434729		MPC.28.2
MPC.3.1	2017-12-13	1899-12-31 06:45:47	0.0020269	3.91e-07	6.39771	0.192951	1.44516	0.00572267	1.43399		MPC.3.1
MPC.36.1	2017-12-13	1899-12-31 10:53:43	0.00203614	3.14e-07	10.957	0.154392	0.0970571	0.000947992	0.0870079		MPC.36.1
MPC.4.1	2017-12-13	1899-12-31 00:37:33	0.00203055	1.679e-06	8.19793	0.826774	0.0946656	0.00789692	0.0818351		MPC.4.1
MPC.5.1	2017-12-13	1899-12-31 06:09:00	0.00203429	4.12e-07	10.0451	0.202375	0.046159	0.00022228	0.0348246		MPC.5.1
MPC.7.1	2017-12-13	1899-12-31 01:51:05	0.00203569	1.9e-07	10.7389	0.0932365	0.0459663	0.000233197	0.0334677		MPC.7.1
MPC.8.1	2017-12-12	1899-12-31 19:40:02	0.00203124	2.86e-07	8.53735	0.140847	0.0575772	0.000153644	0.0434038		MPC.8.1
MPC.9.1	2017-12-13	1899-12-31 04:55:09	0.00202121	6.43e-07	3.58937	0.31788	2.48678	0.000869599	2.47512		MPC.9.1
MPC2.10.2	2017-12-13	1899-12-31 14:46:33	0.00202872	3.69e-07	7.29594	0.18192	0.0433208	0.000262652	0.0343226		MPC2.10.2
MPC2.100.2	2017-12-13	1899-12-31 12:19:25	0.0020324	2.08e-07	9.11099	0.102523	0.0470545	0.000370961	0.0373922		MPC2.100.2
MPC2.102.2	2017-12-13	1899-12-31 12:56:10	0.00203235	2.93e-07	9.08864	0.144064	0.0534409	0.000254025	0.0439444		MPC2.102.2
MPC2.2.2	2017-12-12	1899-12-31 19:52:19	0.00202321	3.1e-07	4.57303	0.153006	0.0581865	0.000326785	0.0440685		MPC2.2.2
MPC2.21.2	2017-12-12	1899-12-31 22:59:22	0.00202918	3.05e-07	7.52239	0.150472	0.0541998	0.000237306	0.0409261		MPC2.21.2
MPC2.25.2	2017-12-13	1899-12-31 12:07:09	0.00202552	1.514e-06	5.71464	0.747459	0.805093	0.00402429	0.795375		MPC2.25.2
MPC2.26.2	2017-12-13	1899-12-31 12:43:54	0.00202638	2.38e-07	6.13844	0.117632	0.0467273	0.000200147	0.0371755		MPC2.26.2
MPC2.27.2	2017-12-13	1899-12-31 13:20:39	0.00202846	2.32e-07	7.1644	0.114307	0.052588	0.000213694	0.043202		MPC2.27.2
MPC2.28.2	2017-12-13	1899-12-31 13:57:33	0.00202604	2.54e-07	5.96987	0.125587	0.0469854	0.000277863	0.037766		MPC2.28.2
MPC2.36.2	2017-12-12	1899-12-31 18:24:49	0.00203095	2.32e-07	8.39642	0.114292	0.061917	0.000310111	0.047404		MPC2.36.2
MPC2.39.2	2017-12-13	1899-12-31 06:21:15	0.00203215	2.26e-07	8.98979	0.111415	0.0500172	0.000188565	0.0387381		MPC2.39.2
MPC2.42.2	2017-12-13	1899-12-31 06:58:02	0.00202584	1.733e-06	5.87389	0.855435	0.0675779	0.000946619	0.0564648		MPC2.42.2
MPC2.50.2	2017-12-13	1899-12-31 11:42:43	0.00203365	2.09e-07	9.73102	0.102657	0.0498345	0.000300772	0.0400065		MPC2.50.2
MPC2.55.2	2017-12-13	1899-12-31 07:34:47	0.0020323	2.63e-07	9.06357	0.129272	0.282221	0.00334374	0.271273		MPC2.55.2
MPC2.57.2	2017-12-13	1899-12-31 01:26:36	0.00203094	3.22e-07	8.39021	0.158333	0.0633855	0.000194299	0.0507764		MPC2.57.2
MPC2.58.2	2017-12-13	1899-12-31 14:09:48	0.00202904	4.93e-07	7.45136	0.242971	0.0518209	0.000105324	0.0426568		MPC2.58.2
MPC2.59.2	2017-12-13	1899-12-31 05:07:34	0.00202823	3.08e-07	7.05236	0.151951	0.0456297	0.000193674	0.0340181		MPC2.59.2
MPC2.67.2	2017-12-13	1899-12-31 00:13:03	0.00203602	3.66e-07	10.8985	0.179792	0.0561935	0.000398688	0.0432524		MPC2.67.2
MPC2.72.2	2017-12-13	1899-12-31 05:44:30	0.00202953	1.98e-07	7.69342	0.0974393	0.0490059	0.000205806	0.0375609		MPC2.72.2
MPC2.75.2	2017-12-13	1899-12-31 13:32:55	0.00203061	2.31e-07	8.23005	0.113981	0.0483147	0.000341699	0.0389841		MPC2.75.2
MPC2.77.2	2017-12-13	1899-12-31 03:53:35	0.00203117	1.72e-07	8.50384	0.0844889	0.0776551	0.000199244	0.0657095		MPC2.77.2
MPC2.78.2	2017-12-13	1899-12-31 02:03:22	0.00203068	2.57e-07	8.26306	0.126483	0.0518878	0.000467092	0.0394447		MPC2.78.2
MPC2.8.2	2017-12-13	1899-12-31 14:34:16	0.00203374	2.99e-07	9.77468	0.147141	0.044804	0.000330681	0.0357503		MPC2.8.2
MPC2.80.2	2017-12-12	1899-12-31 23:36:05	0.00203201	2.82e-07	8.92202	0.138907	0.0710806	0.000420639	0.0579726		MPC2.80.2
MPC2.86.2	2017-12-13	1899-12-31 02:40:06	0.00203025	3.26e-07	8.0528	0.160507	0.0534165	0.000300143	0.0411392		MPC2.86.2
MPC2.88.2	2017-12-13	1899-12-31 03:16:50	0.00203383	1.69e-07	9.81631	0.0832946	0.0572503	0.000276576	0.0451388		MPC2.88.2
MPC2.91.2	2017-12-13	1899-12-31 07:59:28	0.00202502	2.51e-07	5.46877	0.124049	0.05869	0.000193886	0.0478542		MPC2.91.2
MPC2.97.2	2017-12-13	1899-12-31 04:30:30	0.00202632	3.05e-07	6.11287	0.150306	0.0609013	0.000280061	0.0491223		MPC2.97.2
MPC2.98.2	2017-12-13	1899-12-31 00:49:51	0.00202753	3.71e-07	6.70963	0.182774	0.0804895	0.000447721	0.0677145		MPC2.98.2
MPU.1.1	2017-12-12	1899-12-31 23:54:29	0.00203157	7.17e-07	8.70393	0.352857	0.0623009	0.000946394	0.049276		MPU.1.1
MPU.10.1	2017-12-12	1899-12-31 23:17:42	0.00203454	4.2e-07	10.1686	0.206481	0.045428	6.9555e-05	0.032237		MPU.10.1
MPU.11.1	2017-12-12	1899-12-31 20:10:37	0.00202687	4.16e-07	6.38248	0.205431	1.08056	0.00914533	1.06653		MPU.11.1
MPU.12.1	2017-12-13	1899-12-31 04:48:52	0.00203147	2.45e-07	8.65464	0.1208	0.0867918	0.00108607	0.0750957		MPU.12.1
MPU.13.1	2017-12-13	1899-12-31 05:25:56	0.00203402	3.7e-07	9.91218	0.181733	0.0451778	0.000313356	0.033649		MPU.13.1
MPU.14.1	2017-12-13	1899-12-31 06:02:51	0.00203325	2.91e-07	9.5316	0.143131	0.0457114	0.000477296	0.0343493		MPU.14.1
MPU.16.1	2017-12-13	1899-12-31 06:39:39	0.00203431	3.67e-07	10.0567	0.18057	0.0442126	0.000134029	0.0330165		MPU.16.1
MPU.17.1	2017-12-13	1899-12-31 07:16:24	0.00203383	2.14e-07	9.81729	0.10532	0.0529624	0.000887409	0.0419322		MPU.17.1
MPU.19.1	2017-12-12	1899-12-31 22:40:57	0.00203056	5.78e-07	8.20494	0.284787	0.0600672	0.000162945	0.0467104		MPU.19.1
MPU.2.1	2017-12-13	1899-12-31 00:31:25	0.00203032	6.55e-07	8.08425	0.32265	0.33517	0.00112915	0.322312		MPU.2.1
MPU.20.1	2017-12-13	1899-12-31 07:53:21	0.00203322	3.11e-07	9.51894	0.153041	0.045801	0.0002562	0.0349377		MPU.20.1
MPU.21.1	2017-12-13	1899-12-31 08:05:35	0.00203138	5.23e-07	8.60819	0.257546	0.477502	0.00497245	0.466694		MPU.21.1
MPU.22.1	2017-12-13	1899-12-31 10:47:35	0.002035	2.61e-07	10.3981	0.128058	0.0444968	0.000356358	0.0344199		MPU.22.1
MPU.25.1	2017-12-13	1899-12-31 12:01:01	0.00203411	2.88e-07	9.95569	0.141555	0.0439121	0.000450825	0.0341667		MPU.25.1
MPU.28.1	2017-12-13	1899-12-31 10:59:51	0.0020354	4.32e-07	10.5916	0.212163	0.0442911	0.000273526	0.0342696		MPU.28.1
MPU.3.1	2017-12-13	1899-12-31 12:37:45	0.00203168	2.99e-07	8.75487	0.147124	0.064383	0.000988333	0.0548034		MPU.3.1
MPU.31.1	2017-12-12	1899-12-31 18:06:26	0.0020333	2.34e-07	9.55748	0.114902	0.053056	0.000421929	0.03846		MPU.31.1
MPU.32.1	2017-12-12	1899-12-31 19:33:53	0.00202972	3.03e-07	7.78806	0.149082	0.559764	0.00240719	0.545563		MPU.32.1
MPU.4.1	2017-12-13	1899-12-31 01:08:11	0.00203414	2.44e-07	9.97391	0.120114	0.0474804	0.000276438	0.0347882		MPU.4.1
MPU.46.1	2017-12-13	1899-12-31 11:24:18	0.00203301	9.55e-07	9.41104	0.469629	0.0768984	0.000755066	0.0669872		MPU.46.1
MPU.5.1	2017-12-13	1899-12-31 01:44:57	0.00203373	2.89e-07	9.76795	0.142289	0.0510749	0.000385438	0.0385486		MPU.5.1
MPU.6.1	2017-12-13	1899-12-31 02:21:42	0.00203035	1.74e-07	8.10224	0.0859211	0.102128	0.000560331	0.0897675		MPU.6.1
MPU.7.1	2017-12-13	1899-12-31 02:58:26	0.00203176	2.63e-07	8.79822	0.129653	0.0446398	0.000279795	0.0324452		MPU.7.1
MPU.8.1	2017-12-13	1899-12-31 03:35:10	0.00203426	2.59e-07	10.0325	0.127479	0.0439919	0.000182156	0.0319631		MPU.8.1
MPU.9.1	2017-12-13	1899-12-31 04:11:56	0.00203038	1.72e-07	8.11298	0.0848094	0.0495268	0.000329896	0.037664		MPU.9.1
MPU2.10.2	2017-12-13	1899-12-31 14:40:24	0.0020329	3.35e-07	9.36125	0.164943	0.0505401	0.000171516	0.0415142		MPU2.10.2
MPU2.105.2	2017-12-12	1899-12-31 17:00:30	0.00202637	1.99e-07	6.13562	0.0980862	0.0593728	0.000251079	0.0444793		MPU2.105.2
MPU2.11.2	2017-12-13	1899-12-31 14:28:07	0.00202841	3.08e-07	7.14381	0.151809	0.0592388	0.000361419	0.0501574		MPU2.11.2
MPU2.19.2	2017-12-13	1899-12-31 14:03:40	0.00203667	2.64e-07	11.2192	0.129409	0.0453841	0.000349079	0.0361923		MPU2.19.2
MPU2.22.2	2017-12-12	1899-12-31 18:18:41	0.00202701	5e-07	6.44858	0.246809	0.106872	0.000190646	0.0923312		MPU2.22.2
MPU2.25.2	2017-12-12	1899-12-31 19:46:11	0.00202028	1.96e-07	3.12875	0.0970458	0.059846	0.000319105	0.0457003		MPU2.25.2
MPU2.3.2	2017-12-12	1899-12-31 22:53:13	0.00202768	1.84e-07	6.78333	0.0907162	0.0526091	0.0002247	0.0393076		MPU2.3.2
MPU2.31.2	2017-12-13	1899-12-31 13:14:30	0.00202512	2.78e-07	5.51674	0.137433	0.0456791	0.000295752	0.0362654		MPU2.31.2
MPU2.32.2	2017-12-13	1899-12-31 13:51:24	0.00202687	1.57e-07	6.38155	0.0776585	0.0668075	0.000374971	0.0575603		MPU2.32.2
MPU2.36.2	2017-12-13	1899-12-31 06:15:08	0.00202839	2.34e-07	7.12968	0.115253	0.0453761	0.000228248	0.0340694		MPU2.36.2
MPU2.39.2	2017-12-13	1899-12-31 02:33:58	0.00202844	1.75e-07	7.15631	0.0861772	0.0817306	0.000202744	0.0694256		MPU2.39.2
MPU2.46.2	2017-12-12	1899-12-31 22:16:21	0.00202725	2e-07	6.57187	0.0986614	0.0621415	0.000367455	0.0486736		MPU2.46.2
MPU2.47.2	2017-12-13	1899-12-31 12:50:01	0.00202911	7.71e-07	7.48766	0.380043	0.238614	0.00521282	0.22909		MPU2.47.2
MPU2.50.2	2017-12-13	1899-12-31 03:47:26	0.00202472	1.86e-07	5.32072	0.0918971	0.0617777	0.000388682	0.0498043		MPU2.50.2
MPU2.51.2	2017-12-13	1899-12-31 13:26:47	0.00203345	2.05e-07	9.63326	0.100925	0.0422888	0.000273753	0.0329305		MPU2.51.2
MPU2.54.2	2017-12-13	1899-12-31 11:36:34	0.00203287	3.4e-07	9.34656	0.167121	0.0425445	0.000119322	0.0326887		MPU2.54.2
MPU2.57.2	2017-12-13	1899-12-31 05:38:13	0.00202685	2.81e-07	6.36953	0.138573	0.0467083	0.00025192	0.035235		MPU2.57.2
MPU2.60.2	2017-12-13	1899-12-31 04:24:22	0.00203307	1.98e-07	9.44129	0.0973837	0.0496855	0.00039975	0.0378788		MPU2.60.2
MPU2.62.2	2017-12-13	1899-12-31 12:13:17	0.0020298	2.11e-07	7.82867	0.103734	0.0714105	0.000381811	0.0617204		MPU2.62.2
MPU2.68.2	2017-12-13	1899-12-31 00:43:43	0.00202919	2.93e-07	7.52608	0.144412	0.0593616	0.000213384	0.0465589		MPU2.68.2
MPU2.69.2	2017-12-13	1899-12-31 05:01:26	0.00202886	1.57e-07	7.36417	0.0772686	0.0498451	0.000254924	0.0382057		MPU2.69.2
MPU2.71.2	2017-12-12	1899-12-31 15:43:26	0.00202773	2.39e-07	6.8079	0.117917	0.0775621	0.000332603	0.0623206		MPU2.71.2
MPU2.74.2	2017-12-12	1899-12-31 15:37:22	0.00203009	2.16e-07	7.97214	0.106506	0.0859066	0.000536832	0.0706377		MPU2.74.2
MPU2.75.2	2017-12-12	1899-12-31 16:54:22	0.00202877	1.91e-07	7.31867	0.0943317	0.0727974	0.000460889	0.0578762		MPU2.75.2
MPU2.76.2	2017-12-13	1899-12-31 07:28:40	0.00203074	3.05e-07	8.29363	0.150415	0.0451435	0.000282863	0.0341687		MPU2.76.2
MPU2.77.2	2017-12-12	1899-12-31 16:13:56	0.00203542	3.34e-07	10.6013	0.164149	0.0548547	0.000265014	0.0397509		MPU2.77.2
MPU2.80.2	2017-12-13	1899-12-31 03:10:41	0.00203247	1.98e-07	9.14876	0.0975674	0.0490219	0.000383551	0.0368826		MPU2.80.2
MPU2.81.2	2017-12-13	1899-12-31 01:57:13	0.00203345	2.82e-07	9.63293	0.138506	0.0658213	0.000777431	0.0533504		MPU2.81.2
MPU2.83.2	2017-12-12	1899-12-31 15:49:30	0.00203142	1.57e-07	8.62716	0.0771148	0.0727809	0.000403279	0.0575669		MPU2.83.2
MPU2.87.2	2017-12-12	1899-12-31 23:29:58	0.00203104	3.87e-07	8.44291	0.190612	0.051215	0.000270342	0.0380794		MPU2.87.2
MPU2.91.2	2017-12-13	1899-12-31 01:20:27	0.00203021	3.17e-07	8.02976	0.156178	0.0543635	0.000191533	0.0417266		MPU2.91.2
MPU2.92.2	2017-12-13	1899-12-31 06:51:54	0.00202749	1.98e-07	6.69025	0.0975893	0.0486651	0.000246202	0.0375244		MPU2.92.2
MPU2.93.2	2017-12-12	1899-12-31 16:07:49	0.00202586	3.26e-07	5.88425	0.160989	0.075594	0.000241214	0.0604626		MPU2.93.2
MPU2.97.2	2017-12-13	1899-12-31 00:06:55	0.00203207	1.73e-07	8.95185	0.0852634	0.0521289	0.000265713	0.0391601		MPU2.97.2
MPU2.98.2	2017-12-12	1899-12-31 16:20:05	0.00202515	3.08e-07	5.53328	0.152233	0.0615638	0.000276843	0.0464878		MPU2.98.2
OGC.1.1	2017-12-11	1899-12-31 14:29:00	0.00202545	1.74e-07	5.68268	0.0860092	0.0814462	0.000272242	0.0593688		OGC.1.1
OGC.10.1	2017-12-12	1899-12-31 00:28:03	0.00202578	1.83e-07	5.84219	0.0901984	0.0781205	0.000276773	0.0587471		OGC.10.1
OGC.11.1	2017-12-12	1899-12-31 03:29:58	0.00202543	1.88e-07	5.67	0.0929532	0.0824915	0.000140977	0.0639393		OGC.11.1
OGC.12.1	2017-12-12	1899-12-31 04:30:33	0.00202464	1.7e-07	5.28007	0.0841757	0.0683462	0.00029455	0.0500674		OGC.12.1
OGC.13.1	2017-12-12	1899-12-31 05:31:12	0.00202563	1.76e-07	5.77001	0.0866978	0.088372	0.000384551	0.070367		OGC.13.1
OGC.14.1	2017-12-12	1899-12-31 06:31:49	0.00202644	2.79e-07	6.17089	0.137752	0.0765842	0.000165243	0.0588528		OGC.14.1
OGC.15.1	2017-12-12	1899-12-31 07:32:28	0.00202554	2.17e-07	5.72444	0.106946	0.0888488	0.000288279	0.0713911		OGC.15.1
OGC.16.1	2017-12-12	1899-12-31 08:33:08	0.00202575	1.9e-07	5.82689	0.0936572	0.0757664	0.000233761	0.0585826		OGC.16.1
OGC.17.1	2017-12-12	1899-12-31 09:33:47	0.00202621	2.3e-07	6.0563	0.113706	0.0633949	0.000458294	0.0464849		OGC.17.1
OGC.18.1	2017-12-12	1899-12-31 10:34:28	0.00202639	2.66e-07	6.14321	0.131499	0.0777279	0.00022459	0.0610919		OGC.18.1
OGC.19.1	2017-12-12	1899-12-31 11:35:09	0.00202602	1.89e-07	5.96025	0.0930443	0.0758926	0.000181423	0.0595305		OGC.19.1
OGC.2.1	2017-12-11	1899-12-31 15:29:42	0.00202525	1.48e-07	5.58116	0.0729593	0.0857726	0.000239601	0.0639692		OGC.2.1
OGC.20.1	2017-12-12	1899-12-31 12:35:49	0.00202656	3.4e-07	6.23012	0.167548	0.0801904	0.000318804	0.0641021		OGC.20.1
OGC.3.1	2017-12-11	1899-12-31 17:36:57	0.00202554	1.97e-07	5.72703	0.097112	0.0897997	0.000316795	0.0685706		OGC.3.1
OGC.4.1	2017-12-11	1899-12-31 18:37:37	0.00202566	2.41e-07	5.7853	0.119017	0.0717268	0.000333584	0.0507716		OGC.4.1
OGC.5.1	2017-12-11	1899-12-31 19:38:17	0.00202572	1.37e-07	5.81666	0.067712	0.0791846	0.000400681	0.0585032		OGC.5.1
OGC.6.1	2017-12-11	1899-12-31 22:26:47	0.00202637	1.68e-07	6.13304	0.0831025	0.0849552	0.000343521	0.0650344		OGC.6.1
OGC.7.1	2017-12-12	1899-12-31 02:29:21	0.00202581	1.83e-07	5.85655	0.0901563	0.0770236	0.000461336	0.0581977		OGC.7.1
OGC.8.1	2017-12-12	1899-12-31 01:28:41	0.00202507	2.23e-07	5.49395	0.110278	0.0650603	0.000162229	0.0459606		OGC.8.1
OGC.9.1	2017-12-11	1899-12-31 23:27:25	0.00202608	3.8e-07	5.99205	0.187617	0.0656903	0.000238335	0.0460433		OGC.9.1
OGU.1.1	2017-12-11	1899-12-31 14:22:15	0.0020252	2.79e-07	5.55895	0.137539	0.11232	0.000459876	0.090212		OGU.1.1
OGU.10.1	2017-12-12	1899-12-31 01:21:56	0.00202485	1.96e-07	5.38606	0.0969201	0.117831	0.000391577	0.0987007		OGU.10.1
OGU.11.1	2017-12-12	1899-12-31 02:22:38	0.0020257	2.12e-07	5.80289	0.104631	0.109679	0.000426109	0.0908225		OGU.11.1
OGU.12.1	2017-12-12	1899-12-31 03:23:14	0.00202585	1.91e-07	5.87902	0.0940567	0.124351	0.000199842	0.105768		OGU.12.1
OGU.13.1	2017-12-12	1899-12-31 04:23:50	0.00202566	1.96e-07	5.78348	0.0966631	0.124867	0.000405438	0.106558		OGU.13.1
OGU.14.1	2017-12-12	1899-12-31 13:56:05	0.00202588	3.24e-07	5.89177	0.160031	0.130413	0.000257028	0.114687		OGU.14.1
OGU.15.1	2017-12-12	1899-12-31 05:24:27	0.00202653	1.44e-07	6.21303	0.0712894	0.129821	0.000134258	0.111786		OGU.15.1
OGU.16.1	2017-12-12	1899-12-31 06:25:05	0.00202669	1.91e-07	6.29218	0.0944711	0.12954	0.000472323	0.111778		OGU.16.1
OGU.17.1	2017-12-12	1899-12-31 07:25:44	0.00202639	1.41e-07	6.1437	0.069679	0.110684	0.000375641	0.0931964		OGU.17.1
OGU.18.1	2017-12-12	1899-12-31 08:26:23	0.00202706	1.75e-07	6.47688	0.0861637	0.130068	0.000361451	0.112854		OGU.18.1
OGU.19.1	2017-12-12	1899-12-31 09:27:03	0.00202609	1.89e-07	5.99574	0.0933295	0.12939	0.00043696	0.112449		OGU.19.1
OGU.2.1	2017-12-12	1899-12-31 13:31:36	0.00202639	4.92e-07	6.14391	0.242784	0.103555	0.000473295	0.0877188		OGU.2.1
OGU.20.1	2017-12-12	1899-12-31 10:27:43	0.0020259	2e-07	5.90439	0.0988373	0.125333	0.000426905	0.108666		OGU.20.1
OGU.21.1	2017-12-12	1899-12-31 11:28:23	0.00202612	2.38e-07	6.0095	0.117307	0.118065	0.000341395	0.101672		OGU.21.1
OGU.22.1	2017-12-12	1899-12-31 12:29:04	0.00208078	0.0001038	33.0008	49.8851	0.111518	0.000335384	0.0953987		OGU.22.1
OGU.3.1	2017-12-11	1899-12-31 15:22:57	0.00202488	1.99e-07	5.39706	0.0982641	0.0947572	0.000344982	0.0729233		OGU.3.1
OGU.35.1	2017-12-12	1899-12-31 14:08:17	0.00202633	2.92e-07	6.11411	0.144125	0.10692	0.00085647	0.0912492		OGU.35.1
OGU.36.1	2017-12-12	1899-12-31 13:43:49	0.00202502	6.03e-07	5.46886	0.297831	0.276342	0.0012612	0.260561		OGU.36.1
OGU.4.1	2017-12-11	1899-12-31 17:30:13	0.00202591	4.61e-07	5.90972	0.227745	0.0973732	0.000234232	0.0761137		OGU.4.1
OGU.40.1	2017-12-12	1899-12-31 14:20:33	0.0020261	3.16e-07	6.00263	0.155886	0.0850242	0.000238663	0.0694086		OGU.40.1
OGU.5.1	2017-12-11	1899-12-31 18:30:53	0.00202646	2.41e-07	6.17917	0.119043	0.12663	0.000573924	0.105644		OGU.5.1
OGU.6.1	2017-12-11	1899-12-31 19:31:33	0.00202595	1.8e-07	5.92955	0.0889534	0.111816	0.000295348	0.0911046		OGU.6.1
OGU.7.1	2017-12-11	1899-12-31 22:20:03	0.00202567	1.41e-07	5.7877	0.0693736	0.12154	0.000323695	0.101589		OGU.7.1
OGU.8.1	2017-12-11	1899-12-31 23:20:40	0.00202593	4.79e-07	5.91665	0.236661	0.163408	0.000719812	0.14373		OGU.8.1
OGU.9.1	2017-12-12	1899-12-31 00:21:18	0.00202583	2.33e-07	5.86701	0.115062	0.106894	0.000219984	0.0874906		OGU.9.1
QGC.1.1	2017-12-11	1899-12-31 14:42:30	0.00202756	2.05e-07	6.72247	0.10126	0.0790528	0.000300521	0.0570363		QGC.1.1
QGC.10.1	2017-12-12	1899-12-31 05:44:40	0.0020287	1.75e-07	7.28672	0.0864281	0.0677176	0.000155372	0.0497734		QGC.10.1
QGC.11.1	2017-12-12	1899-12-31 06:45:19	0.0020297	1.74e-07	7.77954	0.0859014	0.0702942	0.000276163	0.0526238		QGC.11.1
QGC.12.1	2017-12-12	1899-12-31 07:45:59	0.00202897	1.98e-07	7.41938	0.0978216	0.0653496	0.000171144	0.047953		QGC.12.1
QGC.13.1	2017-12-12	1899-12-31 08:46:39	0.00202946	2.01e-07	7.66029	0.0990552	0.0618903	0.000228513	0.0447676		QGC.13.1
QGC.14.1	2017-12-12	1899-12-31 09:47:18	0.00202941	1.71e-07	7.6342	0.0842328	0.0575688	0.000172491	0.0407198		QGC.14.1
QGC.15.1	2017-12-12	1899-12-31 10:47:58	0.0020286	1.6e-07	7.23493	0.0791143	0.0560422	0.000207488	0.0394671		QGC.15.1
QGC.16.1	2017-12-12	1899-12-31 11:48:39	0.00202887	3.19e-07	7.37182	0.157045	0.0587309	0.000277374	0.0424297		QGC.16.1
QGC.17.1	2017-12-12	1899-12-31 12:48:02	0.0020292	3.17e-07	7.53032	0.156057	0.0561806	0.000248186	0.0401474		QGC.17.1
QGC.18.1	2017-12-12	1899-12-31 03:43:25	0.00202883	1.44e-07	7.34738	0.0710505	0.0685569	0.000460246	0.0500654		QGC.18.1
QGC.19.1	2017-12-11	1899-12-31 23:40:52	0.00202988	1.58e-07	7.86945	0.0780059	0.0575903	0.000326274	0.038004		QGC.19.1
QGC.2.1	2017-12-11	1899-12-31 15:43:10	0.00202917	2.61e-07	7.51907	0.128706	0.0632993	0.000334468	0.0415566		QGC.2.1
QGC.20.1	2017-12-12	1899-12-31 00:41:29	0.00202768	2.55e-07	6.78093	0.125879	0.0560806	0.000212754	0.0367679		QGC.20.1
QGC.3.1	2017-12-11	1899-12-31 17:50:26	0.00202921	4.2e-07	7.53774	0.206902	0.0582153	0.000177349	0.0370471		QGC.3.1
QGC.4.1	2017-12-11	1899-12-31 18:51:05	0.00202802	3.22e-07	6.9497	0.15894	0.0598907	0.000261441	0.0389962		QGC.4.1
QGC.5.1	2017-12-11	1899-12-31 19:51:46	0.00202903	2.37e-07	7.44959	0.116648	0.0586508	0.000255239	0.0380303		QGC.5.1
QGC.6.1	2017-12-11	1899-12-31 22:40:15	0.00202932	1.88e-07	7.59118	0.0926745	0.0697252	0.00031311	0.0498652		QGC.6.1
QGC.7.1	2017-12-12	1899-12-31 01:42:09	0.0020295	2.2e-07	7.68045	0.108468	0.0578422	0.000128572	0.0388033		QGC.7.1
QGC.8.1	2017-12-12	1899-12-31 02:42:48	0.00202827	1.96e-07	7.07474	0.096521	0.0684305	0.000345358	0.0496653		QGC.8.1
QGC.9.1	2017-12-12	1899-12-31 04:44:01	0.00202849	3.01e-07	7.18313	0.14823	0.0671827	0.00027688	0.0489648		QGC.9.1
QGU.1.1	2017-12-11	1899-12-31 14:35:45	0.00202854	1.6e-07	7.20666	0.0789431	0.066452	0.000170308	0.044405		QGU.1.1
QGU.10.1	2017-12-12	1899-12-31 08:39:53	0.00202896	1.7e-07	7.41307	0.0837633	0.0555472	0.000331824	0.0383939		QGU.10.1
QGU.11.1	2017-12-12	1899-12-31 14:26:39	0.00202944	2.34e-07	7.65311	0.1154	0.0567669	0.000198442	0.0411788		QGU.11.1
QGU.12.1	2017-12-12	1899-12-31 07:39:14	0.00203053	1.77e-07	8.19045	0.0870331	0.0511536	0.000193313	0.0337265		QGU.12.1
QGU.13.1	2017-12-12	1899-12-31 06:38:34	0.00202934	1.67e-07	7.60324	0.0824615	0.057501	0.000356226	0.0398001		QGU.13.1
QGU.14.1	2017-12-12	1899-12-31 05:37:56	0.00202916	1.69e-07	7.51271	0.0832034	0.0543367	0.000268951	0.036362		QGU.14.1
QGU.15.1	2017-12-12	1899-12-31 04:37:17	0.00202957	2.22e-07	7.71517	0.109403	0.0563704	0.000205879	0.0381221		QGU.15.1
QGU.16.1	2017-12-12	1899-12-31 03:36:42	0.00202829	2.64e-07	7.08558	0.130356	0.0557441	0.000125334	0.0372223		QGU.16.1
QGU.17.1	2017-12-12	1899-12-31 01:35:25	0.00202814	1.36e-07	7.00772	0.0672507	0.060481	0.000185825	0.0414117		QGU.17.1
QGU.18.1	2017-12-12	1899-12-31 02:36:05	0.00202861	2.37e-07	7.23977	0.116865	0.0549598	6.3293e-05	0.0361643		QGU.18.1
QGU.19.1	2017-12-12	1899-12-31 00:34:46	0.00202747	1.62e-07	6.67765	0.0797573	0.0790439	0.000205441	0.0597009		QGU.19.1
QGU.2.1	2017-12-11	1899-12-31 15:36:26	0.00202852	1.93e-07	7.19661	0.0953849	0.0637643	0.000242327	0.0419912		QGU.2.1
QGU.20.1	2017-12-12	1899-12-31 12:41:56	0.00202913	2.03e-07	7.49637	0.100057	0.0668268	0.000205854	0.0507661		QGU.20.1
QGU.22.1	2017-12-11	1899-12-31 23:34:08	0.00202893	1.62e-07	7.40088	0.0800266	0.054551	0.000314547	0.0349343		QGU.22.1
QGU.27.1	2017-12-12	1899-12-31 13:37:42	0.0020282	5.68e-07	7.03806	0.279814	0.0754596	0.000232392	0.0596506		QGU.27.1
QGU.3.1	2017-12-11	1899-12-31 17:43:42	0.00202929	1.85e-07	7.57542	0.0909471	0.0571415	0.000245054	0.035943		QGU.3.1
QGU.33.1	2017-12-12	1899-12-31 14:02:11	0.00202852	2.4e-07	7.19609	0.118423	0.05257	0.000264804	0.0368715		QGU.33.1
QGU.4.1	2017-12-11	1899-12-31 18:44:21	0.0020285	1.79e-07	7.18707	0.0884078	0.0569302	0.000225648	0.0360054		QGU.4.1
QGU.5.1	2017-12-11	1899-12-31 19:45:02	0.00202921	1.48e-07	7.53624	0.0730319	0.0584682	0.000298875	0.0378173		QGU.5.1
QGU.6.1	2017-12-11	1899-12-31 22:33:31	0.00202785	2.58e-07	6.86432	0.127267	0.0644852	0.000328872	0.0445948		QGU.6.1
QGU.7.1	2017-12-12	1899-12-31 11:41:54	0.00202929	1.86e-07	7.57569	0.0915607	0.0514256	0.000199226	0.0350939		QGU.7.1
QGU.8.1	2017-12-12	1899-12-31 10:41:13	0.00202921	1.48e-07	7.53838	0.0728574	0.0588106	0.000189727	0.042205		QGU.8.1
QGU.9.1	2017-12-12	1899-12-31 09:40:33	0.00202946	2.34e-07	7.66243	0.115545	0.0545181	0.000135671	0.0376386		QGU.9.1
T2C.1.1	2017-12-11	1899-12-31 14:15:22	0.00202857	1.86e-07	7.22257	0.0915947	0.0797158	0.00017169	0.0575768		T2C.1.1
T2C.10.1	2017-12-12	1899-12-31 02:15:53	0.00202874	2.52e-07	7.30345	0.123995	0.0703364	0.000249144	0.0514497		T2C.10.1
T2C.11.1	2017-12-12	1899-12-31 03:16:30	0.00202875	2.32e-07	7.30968	0.114431	0.0811013	0.000374754	0.0624883		T2C.11.1
T2C.12.1	2017-12-12	1899-12-31 04:17:05	0.00202932	3e-07	7.59391	0.147957	0.0735478	0.000303299	0.0552082		T2C.12.1
T2C.13.1	2017-12-12	1899-12-31 05:17:43	0.00202933	2.02e-07	7.5972	0.0993034	0.0632829	0.000147785	0.045217		T2C.13.1
T2C.14.1	2017-12-12	1899-12-31 06:18:21	0.00203031	2.17e-07	8.07833	0.106698	0.056878	0.000292759	0.0390858		T2C.14.1
T2C.15.1	2017-12-12	1899-12-31 07:18:59	0.00202991	1.89e-07	7.88107	0.093256	0.0790974	0.000388622	0.0615789		T2C.15.1
T2C.16.1	2017-12-12	1899-12-31 08:19:39	0.00202944	1.92e-07	7.6531	0.094817	0.0681005	0.000347535	0.0508559		T2C.16.1
T2C.17.1	2017-12-12	1899-12-31 09:20:18	0.00202917	2.28e-07	7.5164	0.112556	0.0683778	0.000327803	0.0514069		T2C.17.1
T2C.18.1	2017-12-12	1899-12-31 10:20:58	0.00202897	2.13e-07	7.4172	0.104912	0.0682373	0.000267569	0.0515402		T2C.18.1
T2C.19.1	2017-12-12	1899-12-31 11:21:37	0.00202937	1.39e-07	7.61876	0.0683937	0.0658655	0.000450983	0.0494423		T2C.19.1
T2C.2.1	2017-12-11	1899-12-31 15:16:12	0.00202815	2.13e-07	7.0154	0.104878	0.0740392	0.000341536	0.0521748		T2C.2.1
T2C.20.1	2017-12-12	1899-12-31 12:22:18	0.00203019	3.19e-07	8.02367	0.156969	0.0613011	0.00021367	0.0451517		T2C.20.1
T2C.3.1	2017-12-11	1899-12-31 17:23:28	0.0020275	4.09e-07	6.69155	0.201877	0.0619976	0.000229228	0.0407077		T2C.3.1
T2C.4.1	2017-12-11	1899-12-31 18:24:08	0.00202889	1.4e-07	7.37744	0.0691614	0.0592175	0.000265358	0.0382014		T2C.4.1
T2C.5.1	2017-12-11	1899-12-31 19:24:48	0.0020285	1.52e-07	7.18868	0.0750813	0.0571733	0.000201198	0.0364311		T2C.5.1
T2C.6.1	2017-12-11	1899-12-31 22:13:19	0.00202943	2.45e-07	7.64717	0.120556	0.0614051	0.000160412	0.0414236		T2C.6.1
T2C.7.1	2017-12-11	1899-12-31 23:13:56	0.00202987	3.12e-07	7.86528	0.153686	0.0676544	0.000343619	0.0479464		T2C.7.1
T2C.8.1	2017-12-12	1899-12-31 00:14:33	0.00202923	2.08e-07	7.54784	0.102396	0.0614571	0.000268553	0.0420228		T2C.8.1
T2C.9.1	2017-12-12	1899-12-31 01:15:11	0.00202898	1.58e-07	7.42461	0.0778169	0.0731501	0.00047849	0.0539895		T2C.9.1
T2U.1.1	2017-12-11	1899-12-31 14:08:37	0.00203012	1.62e-07	7.98828	0.0799101	0.113958	0.000359806	0.0917883		T2U.1.1
T2U.10.1	2017-12-11	1899-12-31 19:18:03	0.00203102	1.48e-07	8.43174	0.0730302	0.0860579	0.000373903	0.0652853		T2U.10.1
T2U.12.1	2017-12-11	1899-12-31 20:57:27	0.00203023	2.61e-07	8.04272	0.1287	0.0948875	0.000388084	0.0745635		T2U.12.1
T2U.13.1	2017-12-11	1899-12-31 23:07:12	0.00202981	1.68e-07	7.83284	0.082742	0.114895	0.00109424	0.0951565		T2U.13.1
T2U.14.1	2017-12-12	1899-12-31 00:07:49	0.00203106	2.7e-07	8.45101	0.132823	0.0676551	0.000145032	0.0481904		T2U.14.1
T2U.15.1	2017-12-12	1899-12-31 01:08:27	0.00203087	1.55e-07	8.35899	0.0762178	0.0938464	0.000265065	0.0746554		T2U.15.1
T2U.16.1	2017-12-12	1899-12-31 02:09:09	0.00203069	1.51e-07	8.26785	0.0744823	0.0668315	0.000320783	0.0479145		T2U.16.1
T2U.17.1	2017-12-12	1899-12-31 03:09:45	0.00202995	2.18e-07	7.9024	0.107336	0.088837	0.00031392	0.0701935		T2U.17.1
T2U.19.1	2017-12-12	1899-12-31 04:10:21	0.00203033	1.71e-07	8.08857	0.0840893	0.0937691	0.000347505	0.0753992		T2U.19.1
T2U.20.1	2017-12-12	1899-12-31 05:10:58	0.00203069	2.35e-07	8.27024	0.115528	0.0687623	0.000319612	0.050666		T2U.20.1
T2U.21.1	2017-12-12	1899-12-31 06:11:36	0.00203069	2.15e-07	8.26939	0.105842	0.0973878	0.000405474	0.0795652		T2U.21.1
T2U.22.1	2017-12-12	1899-12-31 07:12:14	0.00203037	1.7e-07	8.11075	0.0836257	0.0720183	0.000283487	0.0544694		T2U.22.1
T2U.23.1	2017-12-12	1899-12-31 08:12:55	0.00203078	1.73e-07	8.31331	0.0850675	0.0717398	0.000254681	0.0544648		T2U.23.1
T2U.24.1	2017-12-12	1899-12-31 09:13:34	0.00203182	1.9e-07	8.82493	0.0937441	0.0870555	0.000329487	0.0700542		T2U.24.1
T2U.26.1	2017-12-12	1899-12-31 10:14:13	0.00203069	1.45e-07	8.26893	0.0714977	0.110522	0.000345199	0.0937945		T2U.26.1
T2U.27.1	2017-12-12	1899-12-31 11:14:53	0.00203069	1.37e-07	8.26821	0.0672204	0.0739248	0.000159574	0.0574711		T2U.27.1
T2U.28.1	2017-12-12	1899-12-31 12:15:34	0.00203045	4.38e-07	8.15022	0.215784	0.0550498	9.7024e-05	0.03887		T2U.28.1
T2U.3.1	2017-12-11	1899-12-31 15:09:28	0.00203003	2.63e-07	7.94212	0.129405	0.0731092	0.000348809	0.0512145		T2U.3.1
T2U.8.1	2017-12-11	1899-12-31 17:16:43	0.00202965	1.45e-07	7.75515	0.071626	0.0886733	0.00030669	0.067353		T2U.8.1
T2U.9.1	2017-12-11	1899-12-31 18:17:23	0.00203041	1.98e-07	8.13114	0.0973531	0.0750404	0.000298585	0.0539938		T2U.9.1
TEM.1.1	2017-12-12	1899-12-31 15:25:11	0.00202885	2.87e-07	7.36174	0.141326	0.0875397	0.000280184	0.0722159		TEM.1.1
TEM.10.1	2017-12-13	1899-12-31 07:41:03	0.00203024	2.84e-07	8.04338	0.139987	0.0738206	0.000368707	0.0629018		TEM.10.1
TEM.11.1	2017-12-13	1899-12-31 09:31:42	0.0020309	1.86e-07	8.37394	0.0915707	0.0736453	0.00031412	0.0632259		TEM.11.1
TEM.12.1	2017-12-13	1899-12-31 06:27:24	0.00203076	1.81e-07	8.30444	0.0891382	0.0660955	0.000332937	0.0548442		TEM.12.1
TEM.13.1	2017-12-13	1899-12-31 03:59:41	0.00203003	2.76e-07	7.94391	0.135885	0.0789194	0.000317677	0.0670013		TEM.13.1
TEM.14.1	2017-12-13	1899-12-31 07:04:09	0.00203022	1.78e-07	8.03377	0.0876622	0.0609399	0.000279149	0.0498545		TEM.14.1
TEM.15.1	2017-12-13	1899-12-31 04:36:37	0.00203012	1.82e-07	7.98453	0.0898562	0.0684087	0.000409219	0.0566573		TEM.15.1
TEM.16.1	2017-12-13	1899-12-31 05:13:42	0.00203061	3.8e-07	8.22658	0.187339	0.0657633	0.000306255	0.0541793		TEM.16.1
TEM.17.1	2017-12-13	1899-12-31 05:50:37	0.00203086	2.98e-07	8.35056	0.146537	0.0497574	0.000258796	0.03834		TEM.17.1
TEM.18.1	2017-12-13	1899-12-31 03:22:57	0.00203029	2.7e-07	8.06935	0.132861	0.078151	0.000334199	0.0660671		TEM.18.1
TEM.19.1	2017-12-13	1899-12-31 02:46:12	0.00203023	2.72e-07	8.03945	0.133948	0.0466684	0.000166453	0.0344186		TEM.19.1
TEM.2.1	2017-12-12	1899-12-31 15:55:37	0.00202762	2.35e-07	6.75057	0.115685	0.121746	0.000407678	0.10656		TEM.2.1
TEM.20.1	2017-12-13	1899-12-31 00:55:58	0.00202924	2.5e-07	7.55277	0.123378	0.0721215	0.00057553	0.0593742		TEM.20.1
TEM.21.1	2017-12-13	1899-12-31 01:32:43	0.00203014	2.02e-07	7.99451	0.0993851	0.0833693	0.000243986	0.0707878		TEM.21.1
TEM.22.1	2017-12-13	1899-12-31 02:09:29	0.00203003	3.08e-07	7.94464	0.151548	0.0780899	0.000280183	0.0656743		TEM.22.1
TEM.23.1	2017-12-13	1899-12-31 00:19:11	0.00202971	2.82e-07	7.78459	0.139157	0.0907131	0.000727648	0.0777997		TEM.23.1
TEM.24.1	2017-12-13	1899-12-31 08:17:49	0.00203101	2.3e-07	8.42476	0.113125	0.0790753	0.000371547	0.0683224		TEM.24.1
TEM.25.1	2017-12-13	1899-12-31 11:12:06	0.00203044	2.16e-07	8.14207	0.106253	0.0836935	0.000401544	0.0737273		TEM.25.1
TEM.26.1	2017-12-13	1899-12-31 12:25:33	0.00203039	1.85e-07	8.11862	0.09096	0.076321	0.000261826	0.0666863		TEM.26.1
TEM.27.1	2017-12-13	1899-12-31 13:02:17	0.00203056	2.25e-07	8.2027	0.111037	0.0697275	0.000214353	0.0602586		TEM.27.1
TEM.28.1	2017-12-13	1899-12-31 13:39:11	0.00203045	2.97e-07	8.14873	0.146157	0.0539907	0.00033282	0.0446884		TEM.28.1
TEM.29.1	2017-12-13	1899-12-31 14:15:54	0.00202978	3.14e-07	7.81712	0.154483	0.0784545	0.000272067	0.069318		TEM.29.1
TEM.3.1	2017-12-12	1899-12-31 16:26:11	0.00202935	2.59e-07	7.60788	0.127728	0.0805065	0.000225515	0.065458		TEM.3.1
TEM.30.1	2017-12-13	1899-12-31 14:52:40	0.00202999	3.28e-07	7.9203	0.161444	0.0890478	0.000497684	0.0800772		TEM.30.1
TEM.31.1	2017-12-13	1899-12-31 11:48:49	0.00203	3.43e-07	7.9293	0.169026	0.0754874	0.000363272	0.0656869		TEM.31.1
TEM.4.1	2017-12-12	1899-12-31 17:54:14	0.0020297	3.3e-07	7.78039	0.162388	0.086944	0.00054859	0.072293		TEM.4.1
TEM.5.1	2017-12-12	1899-12-31 18:35:59	0.00202858	2.65e-07	7.22654	0.130554	0.0550097	0.00024765	0.0405471		TEM.5.1
TEM.6.1	2017-12-12	1899-12-31 19:58:25	0.00202927	2.93e-07	7.56628	0.144339	0.0897943	0.000343402	0.0757038		TEM.6.1
TEM.7.1	2017-12-12	1899-12-31 22:28:35	0.00202907	2.24e-07	7.4679	0.11033	0.0535974	0.000395732	0.0401848		TEM.7.1
TEM.8.1	2017-12-12	1899-12-31 23:05:30	0.00203	2.8e-07	7.9257	0.137974	0.0805034	0.000296439	0.0672574		TEM.8.1
TEM.9.1	2017-12-12	1899-12-31 23:42:13	0.00202937	1.54e-07	7.6187	0.0758932	0.0927404	0.000490282	0.0796601		TEM.9.1
