# Supplementary material for: Effect of chemical abrasion of zircon on SIMS U–Pb, δ 18 O, trace element, and LA-ICPMS trace element and Lu–Hf isotopic analyses
Source: Copernicus journal article supplement (doi:10.5194/gchron-6-337-2024), 2024-07-10
Supplement: Supplementary file 11 [file Table S8-SI-OH-18O-F.xlsx]

## Sheet: OH-18O
Title	O_LM/O_AA	wStdErr1s	date	time_set1	bkg corr	corr ratio	corr%
mud-1.1	0.0692894	0.000877781	2017-12-13	16:25:38	0.0223641	0.0469254	32.2763
mud-1.2	0.058709	0.000595037	2017-12-13	16:33:11	0.0222749	0.036434	37.9413
mud-1.3	0.0599248	0.000294074	2017-12-13	16:39:15	0.0222033	0.0377216	37.0519
FC1.1.2	0.111881	0.000597975	2017-12-13	17:38:11	0.0215076	0.0903734	19.2236
FC1.1.2	0.113949	0.000679024	2017-12-13	19:26:23	0.0202302	0.093719	17.7537
T2U.30.1	0.111952	0.000236649	2017-12-13	19:31:53	0.0201653	0.0917864	18.0125
T2C.21.1	0.101367	0.000208286	2017-12-13	19:37:24	0.0201001	0.0812674	19.829
OGU.23.1	0.162239	0.000695783	2017-12-13	19:42:56	0.0200348	0.142204	12.349
OGC.30.1	0.115088	0.000659858	2017-12-13	19:48:29	0.0199693	0.0951183	17.3514
QGU.23.1	0.096706	0.000345366	2017-12-13	19:54:01	0.019904	0.076802	20.5819
QGC.31.1	0.0939425	0.000636111	2017-12-13	19:59:32	0.0198388	0.0741037	21.1181
91U.22.2	0.0901021	0.000191085	2017-12-13	20:05:03	0.0197737	0.0703283	21.9459
91C.35.1	0.0930579	0.000542909	2017-12-13	20:10:35	0.0197084	0.0733496	21.1786
FC1.11.2	0.119367	0.000612233	2017-12-13	20:16:15	0.0196415	0.0997255	16.4547
T2U.31.1	0.101366	0.000710196	2017-12-13	20:21:45	0.0195766	0.0817894	19.3128
T2C.22.1	0.114741	0.000658221	2017-12-13	20:27:16	0.0195114	0.0952291	17.0048
OGU.24.1	0.155553	0.000406361	2017-12-13	20:32:49	0.0194459	0.136107	12.5012
OGC.27.1	0.108936	0.000584521	2017-12-13	20:38:22	0.0193804	0.0895552	17.7907
QGU.24.1	0.0913832	0.000192966	2017-12-13	20:43:54	0.0193151	0.0720681	21.1363
QGC.32.1	0.0936438	0.000921293	2017-12-13	20:49:25	0.0192499	0.0743939	20.5566
91U.24.2	0.0921312	0.000247101	2017-12-13	20:54:57	0.0191846	0.0729466	20.8231
91C.34.1	0.0917213	0.000328252	2017-12-13	21:00:29	0.0191193	0.072602	20.845
FC1.28.1	0.107133	0.00019206	2017-12-13	21:06:00	0.0190542	0.0880791	17.7855
T2U.32.1	0.0968505	0.00079855	2017-12-13	21:11:30	0.0189892	0.0778612	19.6068
T2C.23.1	0.119528	0.000402899	2017-12-13	21:17:01	0.0189241	0.100604	15.8324
OGU.25.1	0.149039	0.000358597	2017-12-13	21:22:34	0.0188586	0.13018	12.6535
OGC.29.1	0.153932	0.00372377	2017-12-13	21:28:06	0.0187933	0.135139	12.2088
QGU.26.1	0.210312	0.00113568	2017-12-13	21:33:38	0.0187279	0.191584	8.90485
QGC.30.1	0.090996	0.00014898	2017-12-13	21:39:10	0.0186626	0.0723334	20.5093
91U.14.2	0.0910856	0.000979324	2017-12-13	21:44:41	0.0185975	0.0724881	20.4176
91C.33.1	0.0934958	0.000424846	2017-12-13	21:50:14	0.018532	0.0749639	19.8212
FC1.12.2	0.162295	0.000470342	2017-12-13	21:55:44	0.018467	0.143828	11.3787
T2U.33.1	0.0889904	0.000356991	2017-12-13	22:01:15	0.0184019	0.0705885	20.6785
T2C.24.1	0.12133	0.000256128	2017-12-13	22:06:46	0.0183368	0.102993	15.1131
OGU.26.1	0.201824	0.00035175	2017-12-13	22:12:19	0.0182713	0.183553	9.05306
OGC.28.1	0.11865	0.000217112	2017-12-13	22:17:52	0.0182057	0.100445	15.344
QGU.25.1	0.0922538	0.000489091	2017-12-13	22:23:23	0.0181406	0.0741132	19.6638
QGC.28.1	0.0914523	9.3028e-05	2017-12-13	22:28:55	0.0180753	0.073377	19.7647
91U.12.2	0.0867599	0.000293941	2017-12-13	22:34:26	0.0180102	0.0687497	20.7586
91C.32.1	0.0888059	0.000861038	2017-12-13	22:39:59	0.0179446	0.0708613	20.2066
FC1.7.2	0.120984	0.000346974	2017-12-13	22:45:30	0.0178795	0.103105	14.7784
T2U.34.1	0.128542	0.000551913	2017-12-13	22:51:00	0.0178146	0.110727	13.859
T2C.25.1	0.114791	0.000597159	2017-12-13	22:56:31	0.0177495	0.0970413	15.4624
OGU.27.1	0.1681	0.000401578	2017-12-13	23:02:05	0.0176837	0.150416	10.5198
OGC.26.1	0.101547	0.000573463	2017-12-13	23:07:37	0.0176184	0.0839286	17.35
QGU.8.1	0.0904708	0.000309269	2017-12-13	23:13:10	0.0175529	0.0729179	19.4017
QGC.29.1	0.0932513	0.000179575	2017-12-13	23:18:41	0.0174878	0.0757636	18.7534
91U.6.2	0.0869128	0.000202231	2017-12-13	23:24:13	0.0174224	0.0694903	20.0459
91C.31.1	0.0890676	0.000203952	2017-12-13	23:29:46	0.0173569	0.0717107	19.4874
FC1.4.2	0.0919381	0.000273338	2017-12-13	23:35:17	0.0172918	0.0746463	18.8081
T2U.35.1	0.0995824	0.000310723	2017-12-13	23:40:47	0.0172269	0.0823555	17.2991
T2C.26.1	0.101281	0.000154358	2017-12-13	23:46:19	0.0171615	0.0841194	16.9445
OGU.28.1	0.150701	0.00027934	2017-12-13	23:52:01	0.0170942	0.133606	11.3432
OGC.25.1	0.101546	0.000354893	2017-12-13	23:57:34	0.0170287	0.0845175	16.7694
QGU.29.1	0.108509	0.000384783	2017-12-14	00:03:06	0.0169634	0.0915454	15.6332
QGC.27.1	0.100785	0.000811304	2017-12-14	00:08:38	0.0168981	0.0838869	16.7665
91U.2.2	0.0849859	0.00018733	2017-12-14	00:14:11	0.0168326	0.0681534	19.8063
91C.30.1	0.0889048	0.000192565	2017-12-14	00:19:53	0.0167653	0.0721395	18.8576
FC1.5.2	0.190966	0.000443997	2017-12-14	00:25:33	0.0166984	0.174268	8.74415
T2U.37.1	0.135137	0.000191192	2017-12-14	00:31:04	0.0166332	0.118503	12.3085
T2C.27.1	0.123432	0.000157079	2017-12-14	00:36:37	0.0165677	0.106864	13.4225
OGU.29.1	0.159416	0.00019618	2017-12-14	00:42:10	0.0165022	0.142914	10.3516
OGC.24.1	0.113177	0.000461649	2017-12-14	00:47:43	0.0164367	0.0967399	14.523
QGU.31.1	0.104712	0.000435967	2017-12-14	00:53:16	0.0163712	0.088341	15.6344
91U.30.1	0.0876821	0.00059334	2017-12-14	00:58:45	0.0163064	0.0713757	18.5972
91C.29.1	0.0884133	0.00018413	2017-12-14	01:04:18	0.0162409	0.0721724	18.3693
FC1.9.2	0.101572	0.000324473	2017-12-14	01:09:58	0.016174	0.0853976	15.9237
T2U.38.1	0.116471	0.000380958	2017-12-14	01:15:29	0.0161089	0.100362	13.8308
T2C.28.1	0.103601	0.000197032	2017-12-14	01:21:03	0.0160432	0.0875583	15.4855
OGU.30.1	0.15165	9.6753e-05	2017-12-14	01:26:36	0.0159776	0.135672	10.5359
OGC.31.1	0.131748	0.000370827	2017-12-14	01:32:08	0.0159123	0.115835	12.0779
QGU.35.1	0.0900131	0.000294179	2017-12-14	01:37:40	0.015847	0.0741661	17.6052
QGC.25.1	0.101649	0.000707563	2017-12-14	01:43:10	0.0157821	0.0858673	15.526
91U.28.1	0.0864474	0.000202552	2017-12-14	01:48:42	0.0157167	0.0707307	18.1807
91C.28.1	0.0887567	0.000291232	2017-12-14	01:54:24	0.0156494	0.0731073	17.6318
FC1.10.2	0.085508	0.000215833	2017-12-14	02:00:04	0.0155825	0.0699254	18.2235
T2U.39.1	0.146198	0.000197614	2017-12-14	02:05:36	0.0155172	0.13068	10.6139
T2C.29.1	0.0973406	0.000483688	2017-12-14	02:11:10	0.0154515	0.0818891	15.8736
OGU.31.1	0.183231	0.000427212	2017-12-14	02:16:43	0.015386	0.167845	8.39706
OGC.23.1	0.120022	0.00016272	2017-12-14	02:22:15	0.0153207	0.104701	12.7649
QGU.30.1	0.12092	0.000257774	2017-12-14	02:27:48	0.0152551	0.105665	12.6159
QGC.24.1	0.103188	0.000419593	2017-12-14	02:33:20	0.0151898	0.0879985	14.7205
91U.27.1	0.0884817	0.000299889	2017-12-14	02:38:51	0.0151247	0.073357	17.0936
91C.26.1	0.087054	0.000233819	2017-12-14	02:44:23	0.0150594	0.0719947	17.2989
FC1.29.1	0.107752	0.000229976	2017-12-14	02:49:54	0.0149942	0.092758	13.9155
T2U.40.1	0.117159	0.000260859	2017-12-14	02:55:25	0.0149291	0.102229	12.7427
T2C.33.1	0.110471	0.000874203	2017-12-14	03:00:57	0.0148638	0.0956076	13.4549
OGU.32.1	0.186833	0.000292032	2017-12-14	03:06:28	0.0147987	0.172034	7.92081
OGC.22.1	0.110218	0.000357968	2017-12-14	03:12:00	0.0147333	0.0954849	13.3674
QGU.32.1	0.143299	0.000407546	2017-12-14	03:17:33	0.0146678	0.128631	10.2358
QGC.23.1	0.104394	0.000268969	2017-12-14	03:23:05	0.0146025	0.0897916	13.9879
91U.26.1	0.11957	0.00452996	2017-12-14	03:28:35	0.0145376	0.105033	12.1582
91C.25.1	0.0915311	0.000283948	2017-12-14	03:34:06	0.0144724	0.0770587	15.8115
FC1.27.1	0.0948538	0.000550745	2017-12-14	03:39:46	0.0144055	0.0804483	15.1871
T2U.41.1	0.125056	0.00074322	2017-12-14	03:45:18	0.0143402	0.110716	11.467
T2C.30.1	0.0882419	0.000256621	2017-12-14	03:50:50	0.0142749	0.0739671	16.177
OGU.33.1	0.141973	0.000315209	2017-12-14	03:56:23	0.0142094	0.127764	10.0085
OGC.21.1	0.0990421	0.00043695	2017-12-14	04:01:55	0.014144	0.0848981	14.2808
QGU.34.1	0.0847426	0.000228022	2017-12-14	04:07:26	0.0140789	0.0706637	16.6137
QGC.22.1	0.0902301	0.000150204	2017-12-14	04:12:54	0.0140144	0.0762158	15.5318
91U.25.1	0.0843444	0.000206245	2017-12-14	04:18:24	0.0139494	0.070395	16.5387
91C.24.1	0.153515	0.000196057	2017-12-14	04:23:56	0.0138841	0.13963	9.04417
FC1.2.2	0.130305	0.000373312	2017-12-14	04:29:36	0.0138172	0.116488	10.6037
T2U.29.1	0.110361	0.000533668	2017-12-14	04:35:06	0.0137523	0.0966089	12.4612
T2C.31.1	0.100503	0.000187177	2017-12-14	04:40:34	0.0136878	0.0868157	13.6192
OGU.37.1	0.180311	0.000166475	2017-12-14	04:46:04	0.0136228	0.166688	7.55518
OGC.32.1	0.115188	0.000137756	2017-12-14	04:51:36	0.0135575	0.10163	11.7699
QGU.36.1	0.087148	0.000316983	2017-12-14	04:57:07	0.0134924	0.0736556	15.4821
QGC.21.1	0.0885782	0.000433444	2017-12-14	05:02:35	0.0134278	0.0751504	15.1593
91U.18.2	0.0857517	0.000291595	2017-12-14	05:08:05	0.0133629	0.0723888	15.5833
91C.27.1	0.0858915	0.000185383	2017-12-14	05:13:37	0.0132976	0.0725939	15.4818
FC1.30.1	0.0851237	0.000216552	2017-12-14	05:19:07	0.0132327	0.0718911	15.5452
TEM.5.1	0.0836794	0.000410272	2017-12-14	05:24:56	0.013164	0.0705154	15.7315
915.1.1	0.0809465	0.000467662	2017-12-14	05:30:25	0.0130992	0.0678473	16.1826
MPU.23.1	0.0809071	0.000226028	2017-12-14	05:35:57	0.0130339	0.0678732	16.1097
MPU.24.1	0.0786348	0.00032703	2017-12-14	05:41:25	0.0129694	0.0656654	16.4932
MPC.23.1	0.0941693	0.0017249	2017-12-14	05:46:56	0.0129043	0.081265	13.7033
MPC.24.1	0.0855003	0.000519893	2017-12-14	05:52:25	0.0128395	0.0726608	15.0169
TEM.1.1	0.0960267	0.000282416	2017-12-14	05:58:04	0.0127728	0.0832539	13.3013
915.2.1	0.0836678	0.00052132	2017-12-14	06:03:42	0.0127063	0.0709614	15.1866
MPU.26.1	0.0957912	0.000248338	2017-12-14	06:09:14	0.012641	0.0831502	13.1964
MPU.27.1	0.0798242	0.000376471	2017-12-14	06:14:42	0.0125765	0.0672478	15.7552
MPC.29.1	0.0842651	0.000895503	2017-12-14	06:20:14	0.0125111	0.0717539	14.8474
MPC.30.1	0.0888866	0.000698024	2017-12-14	06:25:42	0.0124466	0.07644	14.0028
TEM.2.1	0.0943743	0.000294692	2017-12-14	06:31:13	0.0123815	0.0819928	13.1195
915.3.1	0.083415	0.000186633	2017-12-14	06:36:42	0.0123167	0.0710983	14.7656
MPU.28.1	0.0835546	0.000596724	2017-12-14	06:42:14	0.0122514	0.0713032	14.6628
MPU.29.1	0.0867706	0.00038002	2017-12-14	06:47:43	0.0121867	0.0745839	14.0447
MPC.31.1	0.088925	0.000579723	2017-12-14	06:53:15	0.0121214	0.0768037	13.631
MPC.34.1	0.0846243	0.000556973	2017-12-14	06:58:44	0.0120566	0.0725677	14.2472
TEM.3.1	0.116184	0.000412533	2017-12-14	07:04:14	0.0119917	0.104193	10.3213
915.4.1	0.082801	0.000165348	2017-12-14	07:09:43	0.011927	0.070874	14.4044
MPU.33.1	0.106548	0.00126025	2017-12-14	07:15:15	0.0118616	0.0946867	11.1326
MPU.34.1	0.085403	0.000229496	2017-12-14	07:20:48	0.0117961	0.0736069	13.8123
MPC.35.1	0.0851901	0.000144259	2017-12-14	07:26:20	0.0117308	0.0734593	13.7701
MPC.32.1	0.0816985	0.000339696	2017-12-14	07:31:50	0.0116659	0.0700327	14.2792
TEM.4.1	0.0929729	0.00038595	2017-12-14	07:37:20	0.0116009	0.0813719	12.4778
915.5.1	0.0999559	0.000620692	2017-12-14	07:42:50	0.011536	0.0884199	11.5411
MPU.35.1	0.085049	0.000177886	2017-12-14	07:48:20	0.0114711	0.073578	13.4876
MPC.33.1	0.0837346	0.000385649	2017-12-14	07:53:51	0.0114059	0.0723287	13.6215
Selected flags
Normalize to SBM	NO
Deadtime correction	NO
F test	NO
Follow raw rejects on other channels	NO
Subtract zeros	YES
EISIE correction	NO
EISIE cut off at zero	NO
EISIE sets	NO
EISIE on interp B	NO
Detector gain correction	NO
Raw median ±MAD	NO
Detector Type
Detector 1	CUP
Detector 2	CUP
Detector 3	CUP
Detector 4	CUP
Detector 5	CUP
Deadtime
Channel 1	25ns
Channel 2	25ns
Channel 3	25ns
Channel 4	25ns
Channel 5	25ns
Detector Gain
Channel 1	1
Channel 2	1
Channel 3	1
Channel 4	1
Channel 5	1
Bacgrounds
Detector 1	CUSTOM
Detector 2	MEASURED
Detector 3	CUSTOM
Detector 4	MEASURED
Detector 5	CUSTOM
EISIE
Channel 1	Selected detector	Correction factor
Channel 2	Selected detector	Correction factor
Channel 3	Selected detector	Correction factor
Channel 4	Selected detector	Correction factor
Channel 5	Selected detector	Correction factor
Set Selection
ALL USED
F test limits
Upper	0	1e+99
MC Ratios Configuration
Standard Name	91	8.2
Max 2s Rejects	1
Median	FALSE	FALSE
Gain drift correction	FALSE
Gain drift correction polynomial order	1
Gain drift correction type	Polynomial
Gain drift correction savitsky-golay side points	6
EISIE Correction	FALSE	FALSE
Ratio Instrumental Bias 4.311144E+1
Sulphur Configuration
S correction	FALSE
S standard name	FC
34/32 Std R	1.2	7.78
Subset Std only	FALSE	10
Oxygen Configuration
O Std name	FC
17/16 Std ratio	2.7
18/16 Std ratio	5.2
18/16 to 17/16 constant	0.52
Custom backgrounds detector: 1
Custom background: YES
Method: Mean
Fixed value: 0.000000E+0
Polynomial order: 0
Polynomial algorithm: SVD
Polynomial method: Least Square
SavG side points: 6
SavG order: 3
Custom backgrounds detector: 2
Custom background: NO
Method: Fixed Value
Fixed value: 0.000000E+0
Polynomial order: 0
Polynomial algorithm: SVD
Polynomial method: Least Square
SavG side points: 6
SavG order: 3
Custom backgrounds detector: 3
Custom background: YES
Method: Mean
Fixed value: 0.000000E+0
Polynomial order: 0
Polynomial algorithm: SVD
Polynomial method: Least Square
SavG side points: 6
SavG order: 3
Custom backgrounds detector: 4
Custom background: NO
Method: Fixed Value
Fixed value: 0.000000E+0
Polynomial order: 0
Polynomial algorithm: SVD
Polynomial method: Least Square
SavG side points: 6
SavG order: 3
Custom backgrounds detector: 5
Custom background: YES
Method: Mean
Fixed value: 0.000000E+0
Polynomial order: 0
Polynomial algorithm: SVD
Polynomial method: Least Square
SavG side points: 6
SavG order: 3

## Sheet: Fppm
Title	19F/18O	wStdErr1s	F ppm
91C.24.1	0.0173441	0.000332676	19.5236
91C.25.1	0.0134099	0.000192176	15.095
91C.26.1	0.0142405	0.000170198	16.03
91C.27.1	0.0127852	7.8389e-05	14.3918
91C.28.1	0.0105969	0.000161772	11.9286
91C.29.1	0.0108438	0.00019879	12.2065
91C.30.1	0.0139018	0.000190713	15.6488
91C.31.1	0.0142328	0.000261525	16.0214
91C.32.1	0.0119927	0.000211374	13.4998
91C.33.1	0.0109214	0.000136986	12.2938
91C.34.1	0.0125162	0.000407639	14.089
91C.35.1	0.0139259	0.000168186	15.6759
91U.12.2	0.0110618	0.000124668	12.4519
91U.14.2	0.011886	0.000250564	13.3796
91U.18.2	0.0132881	0.000309651	14.9579
91U.2.2	0.0112239	8.8441e-05	12.6344
91U.22.2	0.0154303	0.000370648	17.3694
91U.24.2	0.0147401	0.000386663	16.5925
91U.25.1	0.0148905	0.000174299	16.7617
91U.26.1	0.0166351	0.00103737	18.7256
91U.27.1	0.0128761	0.000149152	14.4941
91U.28.1	0.012578	0.000317342	14.1586
91U.30.1	0.0126874	0.00021943	14.2818
91U.6.2	0.0126081	0.000218323	14.1925
FC1.1.2	0.0136684	0.000184537	15.386
FC1.1.2	0.0124686	7.1689e-05	14.0355
FC1.10.2	0.0123426	5.0471e-05	13.8936
FC1.11.2	0.0290499	0.000180702	32.7005
FC1.12.2	0.0242248	0.000312604	27.269
FC1.2.2	0.0283101	0.000457274	31.8677
FC1.27.1	0.0123497	0.000262906	13.9017
FC1.28.1	0.0172741	0.000343673	19.4448
FC1.29.1	0.0278651	0.000148171	31.3668
FC1.30.1	0.0121409	0.000289021	13.6666
FC1.4.2	0.013963	0.000264271	15.7176
FC1.5.2	0.0206041	0.000223462	23.1934
FC1.7.2	0.0273028	0.000257409	30.7338
FC1.9.2	0.0178609	0.000113598	20.1054
MPC.23.1	0.0157468	0.000203453	17.7256
MPC.24.1	0.016837	0.000466103	18.9528
MPC.29.1	0.0124909	0.000259402	14.0605
MPC.30.1	0.0166771	0.000523262	18.7728
MPC.31.1	0.0125674	0.000264944	14.1467
MPC.32.1	0.00984148	0.000102208	11.0782
MPC.33.1	0.00975792	0.000160853	10.9841
MPC.34.1	0.0127305	0.000258064	14.3303
MPC.35.1	0.0101178	0.000205372	11.3892
MPU.23.1	0.0111183	0.000453928	12.5155
MPU.24.1	0.0112732	9.1259e-05	12.6898
MPU.26.1	0.0171079	0.000852371	19.2578
MPU.27.1	0.011707	0.000342213	13.1781
MPU.28.1	0.0113222	0.000135639	12.745
MPU.29.1	0.0114754	0.00022494	12.9174
MPU.33.1	0.0126955	0.000224981	14.2909
MPU.34.1	0.0145783	0.000535314	16.4102
MPU.35.1	0.0143565	0.000295776	16.1606
OGC.21.1	0.0110118	0.00016457	12.3956
OGC.22.1	0.0112334	0.000324327	12.645
OGC.23.1	0.0121443	6.3946e-05	13.6704
OGC.24.1	0.0119164	0.00015707	13.4139
OGC.25.1	0.0123515	0.000350609	13.9037
OGC.26.1	0.01142	0.000324852	12.8551
OGC.27.1	0.0111074	0.000172454	12.5033
OGC.28.1	0.0112856	0.000392209	12.7038
OGC.29.1	0.0160491	4.9349e-05	18.066
OGC.30.1	0.0105673	0.000261567	11.8953
OGC.31.1	0.0118018	0.000175875	13.2849
OGC.32.1	0.011377	0.000205092	12.8067
OGU.23.1	0.0123521	0.0003123	13.9043
OGU.24.1	0.0101918	0.000256334	11.4725
OGU.25.1	0.0105916	0.000337542	11.9226
OGU.26.1	0.0112103	0.000187725	12.6191
OGU.27.1	0.0109122	0.000275439	12.2835
OGU.28.1	0.00988448	0.00014416	11.1266
OGU.29.1	0.0102447	0.000121425	11.5321
OGU.30.1	0.011937	0.000224605	13.4371
OGU.31.1	0.01257	0.000401342	14.1496
OGU.32.1	0.017801	0.000128261	20.0379
OGU.33.1	0.0127507	0.000232018	14.3531
OGU.37.1	0.0132532	0.000171605	14.9186
QGC.21.1	0.0119506	0.000238123	13.4523
QGC.22.1	0.0113243	0.000103059	12.7473
QGC.23.1	0.014422	0.000236451	16.2344
QGC.24.1	0.0311827	8.6744e-05	35.1012
QGC.25.1	0.0128979	0.000269227	14.5187
QGC.27.1	0.0112646	0.000210855	12.6802
QGC.28.1	0.0111011	0.000247551	12.4961
QGC.29.1	0.012033	0.000356998	13.5452
QGC.30.1	0.0118634	4.6595e-05	13.3542
QGC.31.1	0.011028	0.000228825	12.4138
QGC.32.1	0.0101604	0.00026746	11.4372
QGU.23.1	0.0122033	0.000349119	13.7368
QGU.24.1	0.0108972	0.000200414	12.2666
QGU.25.1	0.010381	0.000156662	11.6855
QGU.26.1	0.0360811	0.000755603	40.6152
QGU.29.1	0.0107899	0.00019374	12.1458
QGU.30.1	0.0173759	4.5271e-05	19.5594
QGU.31.1	0.0116793	0.000265783	13.147
QGU.32.1	0.0125858	0.000312136	14.1673
QGU.34.1	0.0115498	0.000250878	13.0012
QGU.35.1	0.0117308	0.000347406	13.205
QGU.36.1	0.0120368	0.000334152	13.5494
QGU.8.1	0.0107632	0.000285448	12.1158
T2C.21.1	0.0126363	0.000177685	14.2243
T2C.22.1	0.0107151	0.000193371	12.0616
T2C.23.1	0.0103421	4.5663e-05	11.6417
T2C.24.1	0.0114016	0.000237234	12.8344
T2C.25.1	0.0109607	0.00019842	12.3381
T2C.26.1	0.0123359	5.384e-05	13.8861
T2C.27.1	0.0103038	0.000165717	11.5986
T2C.28.1	0.0120427	0.000407743	13.556
T2C.29.1	0.0101757	0.000141422	11.4544
T2C.30.1	0.0106371	0.000193529	11.9738
T2C.31.1	0.0112038	0.000153996	12.6117
T2C.33.1	0.0121418	0.000244951	13.6676
T2U.29.1	0.0133826	0.000394773	15.0643
T2U.30.1	0.0116791	0.000142987	13.1467
T2U.31.1	0.0109992	0.000174456	12.3814
T2U.32.1	0.0111129	0.000157229	12.5094
T2U.33.1	0.0104939	0.00017088	11.8127
T2U.34.1	0.0140233	0.000431426	15.7856
T2U.35.1	0.0124738	0.000188412	14.0414
T2U.37.1	0.0123161	0.000235153	13.8638
T2U.38.1	0.0112531	0.000243211	12.6672
T2U.39.1	0.0180035	0.000432599	20.2659
T2U.40.1	0.0125142	0.000125392	14.0868
T2U.41.1	0.0121245	0.000297271	13.6481
