# Supplementary material for: Effect of chemical abrasion of zircon on SIMS U–Pb, δ 18 O, trace element, and LA-ICPMS trace element and Lu–Hf isotopic analyses
Source: Copernicus journal article supplement (doi:10.5194/gchron-6-337-2024), 2024-07-10
Supplement: Supplementary file 12 [file Table S9-SH2-TE-all-sum.xlsx]

## Sheet: GA6363-references
Spot Name	F ppm	1s uncert%	Al ppm	1s uncert%	P ppm	1s uncert%	Ca ppm	1s uncert%	Ti ppm	1s uncert%	Fe ppm	1s uncert%	Y ppm	1s uncert%	La ppm	1s uncert%	Ce ppm	1s uncert%	Pr ppm	1s uncert%	Nd ppm	1s uncert%	Sm ppm	1s uncert%	Eu ppm	1s uncert%	Gd ppm	1s uncert%	Tb ppm	1s uncert%	Dy ppm	1s uncert%	Ho ppm	1s uncert%	Er ppm	1s uncert%	Tm ppm	1s uncert%	Yb ppm	1s uncert%	Lu	1s uncert%	Hf ppm	1s uncert%	Th ppm	1s uncert%	U ppm	1s uncert%	T (Ti)
91C-10.1	14.3636	44.0049	9.13394	178.947	6.85814	8.10739	2.60093	65.8367	4.22855	3.70375	3.72438	29.4715	139.371	2.63526	-0.0012595	77.0627	2.21627	3.79006	0.00309195	50.9761	0.155275	21.5743	0.331924	17.9185	0.242701	11.6996	1.66454	9.73497	0.909042	6.11766	11.3813	3.83204	4.84547	4.08849	23.5489	4.91852	6.196	4.9263	70.2654	4.13022	12.8121	3.3077	4881.14	2.07903	19.2864	6.36914	64.9222	3.81439	671.174
91C-11.1	22.6557	43.8123	17.0005	40.8392	6.82753	8.1617	3.55402	64.5289	4.88571	3.52511	2.50087	28.3314	123.171	2.64516	-0.0039092	47.2076	2.03054	3.84896	0.0106177	29.4583	0.10913	25.877	0.254369	20.8908	0.119996	15.3978	1.58806	9.8558	0.727183	5.83321	9.63415	4.06079	3.88232	4.94469	22.3634	3.52501	5.61926	4.99689	66.0871	4.18274	11.4122	3.38683	5127.38	2.07959	15.5517	7.1597	56.9783	3.9881	682.971
91C-12.1	13.6333	44.7079	8.58664	36.7083	9.8028	7.89643	0.926176	76.8646	4.53775	3.15909	3.1736	28.2924	124.253	2.86408	0.00234093	60.3904	2.23615	3.82614	0.00832454	33.4856	0.10474	26.8722	0.313996	18.206	0.232056	11.9448	2.07642	9.05721	0.728322	5.95606	10.3573	4.05864	3.95655	4.46754	21.996	3.4335	6.03054	6.84854	68.4188	4.19767	12.6512	5.92354	5538.09	2.08417	27.747	5.79923	73.7038	3.75353	676.901
91C-13.1	14.1956	44.4664	10.964	34.9812	10.4751	7.87507	1.30276	72.2629	4.65858	3.12303	3.79064	28.2563	128.133	2.62372	-0.00249306	58.4561	2.32989	4.01934	0.024012	21.2161	0.204269	19.9139	0.388747	16.0685	0.201886	12.735	1.65177	11.5452	0.684041	6.14972	10.4324	4.04289	3.89631	4.51402	21.7806	3.63097	6.03876	4.98222	65.0837	5.74851	11.9116	3.3989	5410.18	2.08493	24.0906	6.17921	74.4388	3.73015	679.051
91C-14.1	20.9878	43.8248	4.9145	35.0078	12.066	7.81211	1.7753	69.6305	5.12938	5.75813	2.96748	28.3138	165.635	2.61471	0.00877437	35.235	2.79381	3.72685	0.0173704	24.6966	0.191939	20.9023	0.404288	18.2222	0.347629	10.6185	3.29356	8.6027	1.12357	8.28887	14.0805	3.75338	5.45141	4.12826	29.7331	3.19851	7.46014	5.11853	83.9299	4.11476	15.34	3.27155	5377.17	2.08878	31.2611	5.64934	93.3261	3.56269	687.013
91C-15.1	27.9102	42.8617	10.2076	36.1261	6.31506	8.27536	5.08953	63.4094	4.17093	3.31422	1.35801	28.5756	144.526	2.62069	-0.00736094	37.5663	2.09284	3.87887	0.00832513	34.0203	0.147465	23.3854	0.37811	16.9488	0.244308	12.0091	2.23632	9.0234	0.833904	5.74738	12.1687	3.89782	4.73019	4.49973	23.7887	3.39447	6.28115	4.98393	79.1123	4.14231	13.3119	3.35433	5135.28	2.29984	21.953	6.43636	67.7981	3.8687	670.069
91C-16.1	17.7376	43.4877	8.89364	36.0128	10.4438	7.85839	2.85934	65.794	4.67958	3.0766	2.88222	28.3065	124.083	2.62536	0.00936238	33.7543	2.15922	3.83017	0.0116207	28.7118	0.107047	26.4916	0.38281	15.9896	0.16258	13.4078	1.57208	11.6103	0.728869	6.06958	10.127	4.04967	3.68363	4.55148	18.8865	4.05312	5.80382	5.00842	65.8871	4.21445	11.5432	6.06299	5497.59	2.08376	23.1923	6.13516	70.0574	3.82467	679.42
91C-17.1	17.091	43.6441	9.38755	51.1863	10.772	7.83798	3.37746	64.9269	4.51428	3.15239	3.02095	28.2911	133.918	2.6221	0.00980928	33.2136	2.22787	5.01676	0.0109843	29.4583	0.190764	20.5117	0.463583	14.1332	0.231207	11.9162	1.95543	9.1621	0.719954	6.0539	11.1726	8.07435	4.31696	14.6377	20.5507	7.09971	6.10247	4.98533	70.4448	4.19164	13.1704	3.58525	5487.03	2.36514	25.8886	5.92126	77.6906	6.0518	676.478
91C-5.1	18.1297	43.6522	12.8317	43.6297	6.26756	8.28183	4.83947	63.6559	3.74366	3.50703	2.85309	28.3207	127.192	2.6249	0.00576181	41.7401	2.18271	3.87589	0.00808268	34.7803	0.154387	23.1041	0.296854	43.2858	0.24518	13.3746	1.79267	9.85412	0.645446	6.40265	10.5328	4.09056	4.62646	4.29138	21.442	3.90694	5.65513	5.0328	68.8164	4.21245	11.5031	6.045	5117.96	2.08507	21.3303	7.39226	55.4844	4.57201	661.451
91C-6.1	16.4736	48.5963	10.074	38.9378	9.65277	7.90354	6.56533	62.5509	4.81068	3.04482	4.03908	28.2478	130.806	3.06348	0.0094197	33.8674	2.43452	4.01593	0.0119905	28.5104	0.322649	20.4485	0.356027	16.6986	0.193761	13.2222	1.73925	10.8543	0.631568	6.21069	9.67396	4.08085	4.29271	4.31064	23.5072	3.35075	5.98913	11.0608	73.467	5.11855	12.6648	3.55316	5193.13	2.43023	22.6069	6.20128	71.4263	4.13964	681.693
91C-7.1	21.3753	43.8636	10.0614	34.9837	10.5936	7.87971	3.75273	64.6637	5.30729	2.97275	3.37777	28.2792	134.123	2.62093	0.00814092	36.2445	2.25364	6.12897	0.0242783	21.5503	0.158484	22.7263	0.391045	45.5672	0.228013	12.1542	1.76953	9.91493	0.707741	6.21605	11.6871	4.00102	4.50362	4.6176	24.3915	7.10861	6.03851	6.55283	70.0522	4.20084	12.2802	5.23359	5273.47	2.08374	21.3183	6.46205	70.9933	3.85461	689.864
91C-9.1	15.6522	43.8482	6.80884	34.9814	7.65445	8.03633	4.0289	63.9749	4.63708	3.06292	4.34755	28.2274	150.938	2.61036	0.0126596	30.0317	2.49426	3.72767	0.0215522	49.9479	0.158726	21.8384	0.375985	15.1496	0.308898	11.0202	2.86905	7.70137	0.829437	5.91266	12.8099	3.76553	4.87973	4.10897	26.3926	3.24434	6.87116	7.1393	82.5711	5.32834	14.6909	3.24805	4994.89	2.08142	23.0831	6.98127	70.7718	6.31431	678.672
91U-1.1	14.6422	43.9671	29.6049	63.3308	10.8745	7.81357	3.26115	64.7197	4.36759	3.09362	6.26109	28.2147	123.417	2.61919	0.00143205	72.8949	2.35002	3.95906	0.0237842	20.6646	0.119874	24.3071	0.421226	17.6577	0.163721	13.409	1.69793	9.55225	0.701954	9.69268	10.3048	6.66484	3.94282	8.95488	21.5752	3.40658	5.80875	4.96299	67.2644	4.17774	11.5893	5.01832	5446.02	2.07777	24.636	5.86708	70.421	3.7344	673.791
91U-2.1	13.9317	44.5723	15.3241	51.3017	11.9834	7.80319	2.60847	66.3608	4.96589	3.56022	5.09158	28.2128	126.902	2.64797	0.00586308	40.4623	2.28507	3.79854	0.0167452	24.58	0.176437	21.2327	0.244333	20.3269	0.164416	15.9574	1.55076	10.8319	0.793444	5.75132	9.46434	4.18687	4.57899	4.46719	20.86	3.49487	5.69686	5.0184	60.9067	4.25264	11.3585	3.69232	5397.34	2.11056	24.1122	6.25073	78.5919	3.71778	684.319
91U-2.2	15.1609	44.0629	10.1495	43.8532	10.3701	7.86537	2.40493	66.7244	4.60865	3.07522	5.96578	28.2328	124.702	2.64499	-0.00606089	39.5432	2.37078	3.76471	0.00495964	42.0146	0.103639	26.6399	0.236816	20.8674	0.145473	14.4741	2.04911	8.80048	0.831986	5.65375	10.7248	8.02805	4.65681	4.21741	22.9393	3.47039	5.61949	5.13966	67.502	6.26578	12.568	3.33429	5619.38	2.07449	23.3501	6.13404	69.6055	4.16053	678.168
91U-3.1	48.2152	45.9702	9.18223	34.9898	9.81989	8.00635	10.0139	62.6464	4.30038	3.48518	3.72398	28.9719	114.618	2.97873	0.022599	26.9189	2.13093	3.96313	0.0273592	21.6548	0.174196	23.1041	0.407899	16.7602	0.192686	14.1605	1.52479	11.3383	0.663548	6.70931	8.67794	5.04894	4.21489	5.19324	19.0534	3.81605	4.90739	5.4106	58.027	4.39741	10.7699	3.79304	5383.85	2.09175	20.9303	11.3456	62.6407	4.13413	672.535
91U-3.2	16.7676	43.3634	15.8832	40.1825	9.87867	7.8431	4.82576	63.1462	4.11552	5.27123	3.9229	28.2292	112.918	2.62261	0.0161221	27.4352	1.99948	5.45282	0.0116697	27.574	0.148977	21.9591	0.249343	17.9315	0.202476	11.9351	1.59938	10.8694	0.696568	5.89159	9.27576	4.0501	4.02959	4.85165	20.4155	3.3861	4.92105	5.06131	58.0832	4.24095	9.34599	3.70682	5243.01	2.07608	18.7808	13.4804	57.1566	3.92283	668.994
91U-4.1	10.2421	45.8422	12.9097	48.4953	11.5693	7.76519	3.8738	63.9954	4.47027	3.05457	5.03028	28.2555	120.54	2.93345	-0.00791657	34.9679	2.24106	3.76883	-0.010906	28.6105	0.0742823	30.3498	0.0879829	25.3702	0.172696	13.6267	1.4661	10.1883	0.699653	6.83723	9.6238	4.0483	4.01781	4.34093	20.5972	3.44126	5.33021	5.01622	63.5744	4.19807	10.6027	3.42704	5222.29	2.59851	22.1632	6.09647	74.038	4.0515	675.679
91U-5.1	22.3668	43.8393	10.7196	34.9753	10.7351	7.86602	0.444982	92.6422	3.87009	4.11037	3.53696	28.2681	114.721	2.63197	-0.00823948	35.9434	2.07969	3.88427	0.00596066	39.6733	0.15604	22.7826	0.195848	23.8248	0.159847	14.1145	1.76268	9.79728	0.665118	6.27622	9.913	4.13344	3.94676	4.49968	20.3012	3.54537	5.38087	5.09023	60.944	4.27978	10.5886	3.49665	5335.63	2.0885	22.0923	6.43495	68.3836	3.85392	664.083
91U-6.1	23.2111	43.5981	9.53336	42.8991	11.11	7.84809	1.99376	68.4214	4.42772	3.18499	3.29681	28.2816	123.654	2.62714	-0.0058207	40.9549	2.11231	4.1032	0.0147223	26.2068	0.120182	25.4352	0.436591	14.9214	0.180253	13.1544	2.18138	22.3238	0.729177	5.99761	9.79752	4.11765	3.90724	4.50041	19.7195	3.71723	5.70421	5.04727	63.2091	4.2526	12.2895	3.40119	5680.16	2.08411	23.181	6.23657	72.8012	6.88039	674.901
91U-6.2	16.5471	43.8041	21.8136	34.9714	10.1037	7.87742	2.43027	66.8397	4.24326	3.22478	3.66637	28.8318	121.884	2.62654	-0.00233743	60.3904	2.17396	3.84071	0.008501	33.1445	0.161531	22.1052	0.338071	17.3098	0.229866	11.9549	1.7452	9.74726	0.74901	11.007	9.8415	7.13558	4.16255	4.38119	21.8045	5.42832	5.50349	5.04333	62.1613	4.25753	11.4006	3.43038	5524.43	2.08389	25.3471	5.96319	69.8696	3.81358	671.454
91U-7.1	13.2785	45.2975	8.83927	34.9791	11.1379	7.87708	2.58172	67.0131	4.33351	3.35576	3.33906	28.3003	119.589	2.63351	-0.00670093	39.7652	2.16228	3.88254	0.0052517	43.1656	0.0962294	29.0606	0.350867	18.5352	0.248441	13.6314	1.89738	9.76996	0.670618	6.37587	9.83107	4.20118	3.82315	4.67765	19.6414	3.68042	5.37911	5.11609	52.4032	9.93111	11.0486	5.37946	5306.51	2.09212	25.5207	6.20905	66.4685	3.97451	673.156
91U-8.1	10.5801	46.5427	15.5354	34.9762	7.62977	9.89224	2.29953	67.6703	3.85502	3.49074	1.4573	28.5533	62.7888	2.68266	-0.00322895	53.7131	1.37397	4.20913	-0.00513352	43.1656	0.00910297	90.3768	0.121044	23.3342	0.09091	18.9947	0.63953	16.6705	0.332537	8.67892	5.6934	5.05382	2.08856	6.58725	10.2951	4.6092	2.98866	5.6565	36.9332	5.0721	5.86368	8.04442	5355.49	2.09008	11.9775	8.38731	43.8079	4.46151	663.773
91U-9.1	22.7297	44.0273	9.10989	34.985	11.5924	9.29334	1.61116	70.1136	4.72682	3.08302	2.77183	28.4241	129.858	2.6239	-0.00942546	33.7543	2.46222	3.7667	0.00943471	31.6	0.114148	25.8055	0.264131	21.1258	0.194336	12.9303	2.07603	9.05126	0.779766	5.97516	11.4631	3.93437	4.03717	4.44798	21.8835	3.46214	6.4145	4.95749	64.8456	5.35765	12.6042	3.36661	5391.7	2.08603	27.3248	6.69886	81.1058	3.65404	680.245
GZ7-2.5	15.7705	48.149	16.8588	34.9735	180.706	7.31223	1.978	67.993	25.9342	3.57737	2.21042	28.3578	592.991	2.61231	0.049967	23.6989	74.8898	3.40466	0.213613	20.0885	3.10969	9.16099	4.70905	6.57083	0.578804	9.11217	16.6593	4.90707	4.98718	3.42819	59.0302	3.01364	19.4105	3.11884	84.7678	2.53562	18.6607	4.56411	183.404	3.85111	29.8637	3.11449	10026.2	2.85931	635.48	3.30062	693.013	2.78383	844.285
GZ7-2.6	26.8407	44.2187	17.8226	35.1704	186.32	7.31632	3.00903	66.2498	25.6395	4.2778	2.30811	28.4084	607.349	2.58228	0.0365984	31.1504	76.3793	3.23955	0.183311	20.388	3.15759	9.40707	4.11922	6.91214	0.560009	9.61508	17.283	8.45339	5.12544	3.50287	54.7082	2.9702	20.3579	3.15931	88.0589	2.57247	18.7435	5.0847	195.21	3.86753	32.3473	3.13762	10155	2.06848	666.368	3.32082	726.609	2.78011	842.996
GZ7-2.7	12.4229	44.9873	17.8516	35.4843	186.658	7.43632	2.2006	67.2607	26.0578	1.68627	2.19296	28.3606	594.086	2.57969	0.0160113	27.9717	73.4293	3.24553	0.193543	12.3287	3.03601	9.25564	4.79024	6.56317	0.503472	9.65861	15.4567	6.5569	5.13145	3.41285	54.451	2.92863	19.2122	3.11859	83.7458	2.53325	17.8149	6.13664	185.53	3.84555	29.4364	2.98125	9514.13	2.06382	624.553	3.37658	688.222	2.71064	844.823
GZ7-2.8	16.7095	43.588	17.657	35.3664	181.631	7.44515	3.50191	64.5849	26.1726	1.68119	2.31149	28.3586	610.188	2.62413	0.0189179	26.6158	76.3495	3.2359	0.217627	12.0246	2.8915	9.31504	4.73816	6.57704	0.663078	8.93	17.4038	7.01271	4.99991	3.4133	58.3458	2.90446	19.4452	3.11155	84.8201	4.33032	18.561	4.5615	185.755	3.84445	30.5412	3.71613	9886.89	2.06111	624.485	3.60586	691.368	2.70723	845.32
GZ7-2.9	15.4492	43.8932	16.0976	35.162	184.127	7.52565	3.95701	64.0369	25.5363	1.68937	1.96206	28.4089	586.78	2.57978	0.0302948	31.7909	73.4119	3.2366	0.212393	11.9728	2.9531	9.2374	4.41562	11.0882	0.502709	9.51382	16.4258	4.90534	4.76425	3.42895	54.9766	2.91843	19.446	3.10437	82.4631	2.52898	17.9529	4.56546	176.422	3.85043	29.6225	2.97726	9469.35	2.16018	591.574	3.38085	679.312	2.70973	842.542
GZ7-3.2	17.0923	43.7184	17.9969	35.1344	173.049	7.33454	1.02303	75.5662	25.4959	1.72115	2.56269	29.3841	560.63	2.58114	0.0418446	27.0846	70.2823	3.24877	0.185365	12.4173	2.49303	9.70483	4.10449	6.8101	0.483715	9.82163	15.0042	5.04759	4.71577	3.49697	51.2645	3.0985	17.9804	4.65026	78.2629	2.64444	18.0002	4.58145	171.267	4.45736	28.6607	3.09561	9727.23	2.05403	576.403	3.32611	647.854	2.72665	842.364
GZ7-3.3	17.8378	43.9391	17.6472	34.9704	173.831	7.43476	3.68434	65.0533	24.4219	2.63884	1.88857	28.4663	525.512	2.58726	0.0257462	34.0976	65.3879	3.24474	0.145044	13.6306	1.7811	10.5167	3.70662	7.08422	0.537674	9.61547	13.2733	5.2788	4.45893	3.59243	49.5586	3.01301	16.2238	3.26664	75.4144	2.64073	16.8701	4.61953	167.267	3.90414	29.3922	3.03542	10123.4	2.08316	589.35	3.34283	653.307	3.08893	837.54
GZ7-3.4	20.3314	43.962	17.2299	34.9733	165.768	8.33799	3.63962	64.4771	27.0017	1.67666	2.24435	28.3575	572.547	2.93386	0.0325992	28.5834	72.3176	3.3663	0.21622	12.7652	2.25418	14.7426	4.21908	6.69824	0.502307	14.031	16.2274	5.24392	4.60119	3.47654	51.1687	2.94012	17.8774	3.14795	79.8847	2.5521	17.6745	4.57357	177.212	4.70212	29.3127	3.10571	9238.09	2.07281	556.107	3.32616	631.574	2.72069	848.86
GZ7-3.4…dup1	14.1922	44.6578	17.8308	34.9993	178.969	7.31539	2.15334	67.9229	23.9243	1.75861	1.92951	28.4333	535.797	2.59579	0.0258231	34.3908	67.3509	3.24289	0.145594	14.5658	2.56857	9.61253	3.79806	6.94169	0.417339	10.1103	12.9528	7.18167	4.33757	3.56586	51.0997	2.97094	16.9292	4.5437	78.1612	2.59234	17.2743	4.59471	170.749	3.88077	29.375	3.00717	10243.9	2.05901	591.862	3.32858	682.251	2.7257	835.248
GZ7-3.5	24.1317	43.2622	15.9685	35.1865	179.429	7.31562	1.28	73.0546	23.7677	1.76569	1.76107	28.4624	541.054	2.59589	0.0382767	47.1658	67.9418	3.24209	0.208744	12.1632	2.52145	9.63471	3.75416	6.97861	0.45923	9.80586	14.2739	5.11173	4.13626	3.59242	51.6523	2.97006	17.81	3.19219	80.2517	2.58227	17.2769	4.59525	167.221	3.89134	29.5195	3.14028	10525	2.05836	614.475	3.32585	674.085	2.72797	834.519
GZ7-3.6	19.9304	43.6441	16.0361	34.9773	176.983	7.32018	2.54262	67.5498	23.81	1.8212	1.72036	28.5111	517.134	2.73052	0.0482307	24.1549	64.014	3.24637	0.144528	13.3559	2.22391	10.1058	3.86292	7.12072	0.464413	9.9924	12.3355	5.35443	4.32849	3.6428	48.1318	3.03747	16.0024	3.2994	72.2213	2.67499	15.8017	4.64603	152.791	3.9424	27.1357	3.07081	9573.23	2.066	561.973	3.36045	626.939	3.29367	834.716
GZ7-4.2	16.7909	43.9391	16.517	35.0604	181.376	7.58067	2.16194	68.0019	23.8626	1.77818	1.81657	28.4603	567.384	2.94401	0.0452858	25.2818	71.3284	3.3956	0.182173	12.581	2.34559	9.85954	4.45761	6.75623	0.575131	9.30447	14.2011	5.13314	4.52295	3.546	53.012	2.96793	18.8322	3.17227	85.3181	2.563	18.5066	4.5837	183.33	3.87249	31.8455	2.99129	10756.9	2.07621	642.068	3.39034	734.346	3.40805	834.961
GZ7-4.3	12.9717	45.3765	17.3043	35.0994	180.03	7.31689	2.23008	68.0019	23.6117	1.78601	1.77382	29.7187	550.913	2.5862	0.028499	35.3077	68.7088	3.24259	0.185234	12.8412	2.31596	10.0088	3.866	6.9832	0.536307	9.58501	13.9355	5.16339	4.45015	3.57865	52.5123	2.97827	18.2295	3.19589	80.8752	2.59248	17.4471	4.60189	177.277	3.8843	29.2347	3.02233	10721.5	2.05878	643.404	3.32332	710.648	2.72598	833.788
GZ7-5.6	26.1034	42.8702	16.2415	35.1368	183.279	7.31034	1.41512	70.7895	25.6175	1.68603	2.05073	28.3743	559.635	2.5801	0.0283412	30.2239	69.5525	3.33377	0.131674	13.3288	2.47967	9.52123	4.09412	6.71819	0.515412	9.34551	14.2954	5.00605	4.46796	3.73955	50.3045	5.2545	18.0493	3.13339	82.5747	2.53335	17.4744	4.57079	176.273	3.85535	28.7421	2.98746	9790.35	2.68746	585.223	3.68205	659.8	3.34992	842.899
GZ7-5.7	24.5347	42.4324	18.0923	35.237	179.619	7.30581	1.99552	66.613	25.7035	1.6189	1.95583	28.9559	605.704	2.57733	0.0289283	29.2912	78.0702	3.23972	0.219541	11.68	2.44548	9.26776	4.46788	8.9856	0.683499	16.3319	17.4986	4.74019	5.14128	3.30497	56.0364	2.86508	20.1212	3.02979	88.9809	2.44957	19.6877	4.51649	205.937	3.79624	32.1926	2.91377	10956	2.0556	672.57	3.32393	761.304	3.13275	843.277
GZ7-5.8	21.2474	44.2213	17.4763	35.0681	179.405	7.30791	2.15352	66.5109	25.2184	1.65218	2.16212	28.4474	592.028	2.61476	0.0138535	28.0597	74.6672	3.23426	0.195239	12.1019	3.00085	9.10806	3.7662	7.15759	0.583563	9.64248	16.0147	4.85134	5.15175	3.34041	54.4259	2.88856	19.0851	3.99306	86.2607	2.48208	18.8808	5.15698	197.818	4.17266	32.2989	3.47136	10010.7	2.11994	641.041	3.34222	711.699	2.74445	841.133
GZ8-2.10	34.4885	42.0216	1.26534	35.0739	79.8798	7.68199	1.14607	73.7186	8.96229	2.38157	4.05205	28.2376	441.406	2.58811	-0.00170863	69.3806	14.5551	3.3173	0.0722717	16.5749	1.23189	11.5014	2.21875	7.88359	0.0493812	19.3577	9.46556	5.49946	3.20311	3.76647	38.0358	3.07049	13.1449	3.32963	55.9527	2.72095	11.18	4.7112	100.556	4.17947	15.8245	3.23966	11124.8	2.05539	249.254	3.53883	1321.24	2.64851	735.916
GZ8-2.2	31.3316	41.8664	1.54486	35.0356	81.5293	7.37033	2.3109	65.752	9.51541	5.93102	3.90273	28.2173	468.028	2.66218	-0.00737276	33.9821	15.6143	3.29105	0.0765604	15.3212	1.24789	10.7497	2.75698	7.63222	0.0686754	21.265	10.5528	5.14759	3.48839	3.52579	40.5189	2.96643	13.8931	4.48659	61.0814	2.74295	12.2478	4.61487	109.062	4.84057	17.5926	3.25163	11322.9	2.31604	254.387	3.45694	1349.04	2.65677	741.462
GZ8-2.3	66.8235	40.4869	1.67599	35.0336	80.1594	7.34414	3.76505	63.7525	10.3554	2.12961	4.34135	28.208	477.906	2.58065	0.0255514	32.7545	16.2906	3.32469	0.11966	13.2102	1.41239	10.5703	2.42763	18.9914	0.114634	14.8839	10.3751	5.19594	3.58942	3.5432	41.1957	2.97551	15.2969	3.33547	59.9752	2.60709	12.538	4.62318	114.332	5.0551	17.3878	3.12535	11862.1	2.21262	273.076	3.45937	1468.64	2.65527	749.4
GZ8-2.4	43.7871	41.2195	1.66033	35.0334	83.0783	7.33908	4.56402	62.9168	10.0167	5.85301	4.25726	28.2054	479.546	2.58009	0.00400584	43.1902	16.3035	3.32134	0.109768	14.739	1.53541	11.0738	2.43994	7.21776	0.0756548	19.4249	9.55807	5.71621	3.64709	3.74267	41.8422	2.96055	14.3619	6.93499	63.5459	3.42728	12.5093	4.61047	119.689	3.90834	18.0437	3.1962	11810.7	2.05379	270.406	3.45208	1430.17	3.03828	746.266
GZ8-2.5	46.4606	41.3294	1.60826	35.0468	81.6345	7.35052	2.12074	67.3496	9.91004	2.25786	4.85974	28.2088	474.534	2.63281	0.00545296	40.7056	16.0318	3.30307	0.0962213	14.6055	1.1988	12.5427	2.31341	7.74607	0.0360766	82.4393	9.50681	5.43454	3.44045	3.65868	41.3831	3.01157	13.3426	3.28758	59.4623	2.66476	11.9648	4.79215	116.004	5.81092	16.3111	6.70816	11598.5	2.06096	266.332	3.50377	1382.5	3.42696	745.26
GZ8-2.6	46.631	41.4432	1.69736	35.817	82.0511	7.58839	2.36087	67.7694	9.46738	2.43323	4.20233	28.2519	456.382	2.58602	-0.000479961	135.328	15.4223	3.3232	0.113588	14.7699	1.97547	11.34	2.38342	7.871	0.067421	24.0925	10.7001	5.48449	3.25356	6.09593	38.5157	3.31152	14.3532	3.57546	55.4716	4.79085	11.5125	4.73869	103.912	5.34939	15.8159	5.22474	10888.7	2.0542	242.568	3.59172	1292.82	2.65545	740.991
GZ8-2.7	53.1129	41.0503	1.54489	35.0616	81.1662	7.36155	1.06221	75.8716	9.32	2.40652	4.41878	28.3126	440.646	2.58957	0.0217504	26.425	14.571	3.32531	0.0911891	15.2227	1.09074	12.0721	1.98502	8.27039	0.0687879	21.3182	9.74162	5.55326	3.20849	3.82197	38.8011	3.09076	12.6788	3.39115	57.2385	2.7491	11.0588	5.71044	102.334	4.04967	15.9148	3.27197	11796	2.05599	254.467	4.65324	1399.47	2.64994	739.533
GZ8-2.8	53.9333	41.1435	1.46018	35.0764	80.6323	7.36729	3.77752	65.0533	9.10162	2.50112	3.68977	28.2807	428.87	2.59098	0.0177729	28.5249	13.9117	3.33702	0.0870598	15.7167	1.35788	11.628	1.86022	8.62727	0.0862172	19.9124	9.49518	5.68763	2.97365	3.96399	35.3306	3.1657	12.7664	3.4242	52.2591	2.84809	10.8434	4.7705	93.0634	4.11446	15.7155	3.31814	11216.1	2.05951	245.301	3.59636	1317.49	2.66016	737.339
GZ8-2.9	41.0565	41.7969	1.45316	35.5178	81.4793	7.36093	0.349682	100.757	8.74698	2.47106	3.91468	28.2607	436.903	2.6877	0.00582552	41.7401	14.4914	3.32521	0.0733957	17.0834	1.21786	11.7521	2.11515	8.08358	0.0495571	28.3617	9.89923	5.51885	3.16763	3.83417	37.7408	3.10385	13.2807	3.35732	55.3684	2.77065	10.3029	4.76032	98.9553	4.06468	16.1047	4.65164	11350.6	2.0573	247.096	3.57084	1338.45	2.65307	733.681
M12-1.1	22.0385	43.5844	3.89291	35.0142	188.14	7.31007	4.54482	63.5062	5.50259	2.83285	3.25736	28.267	821.553	2.64481	0.0103009	32.1507	16.5435	3.3032	0.131006	13.2556	1.86446	10.1145	4.19342	7.15935	0.256937	19.504	16.5245	4.92116	5.88988	6.35452	67.8893	2.86195	26.173	3.01409	126.416	2.40749	28.7016	4.94313	313.589	3.76229	55.4927	2.9176	11799.5	2.04677	402.196	3.38505	888.394	2.67835	692.905
M12-2.1	15.355	44.3981	4.18179	34.999	189.159	7.33271	2.30027	67.6216	6.00548	6.37939	2.22118	28.3819	819.536	2.57852	-0.0019252	67.8187	16.6099	3.31447	0.0701531	17.4567	1.56942	11.1024	3.99821	7.00522	0.243485	21.3986	16.9806	5.31907	5.60083	3.42105	66.5999	2.90135	27.627	3.16367	120.665	2.44917	28.555	4.50597	304.307	3.77996	54.8355	3.24894	11472	2.05059	418.214	3.39866	870.82	2.69194	700.344
M12-3.1	14.3217	43.8751	4.35572	34.9903	184.202	8.04593	2.55509	65.752	6.3496	2.59768	2.09782	28.3652	837.157	2.60077	-0.00152371	69.3806	16.8324	3.29389	0.0915754	21.7337	2.29516	10.2023	3.98458	6.68091	0.287495	10.9362	16.9418	4.83299	5.91416	3.29578	69.6336	2.87798	26.9241	2.97772	120.6	2.40354	27.7729	5.00071	297.9	4.30192	53.4056	2.84361	11208.3	2.14545	397.404	3.37005	850.746	2.72242	705.144
M12-4.1	14.9195	43.9859	3.52652	35.4411	194.843	7.40654	3.01358	65.2206	6.0337	2.69869	2.44882	28.3227	838.369	2.67253	0.00968821	32.7104	17.1039	3.29706	0.0893429	14.8438	2.12339	9.7431	3.93887	6.73524	0.391242	10.0582	17.5079	4.84792	5.82782	4.44436	69.7235	2.85436	26.7901	2.99561	121.882	2.41173	28.0872	4.48895	290.544	3.82922	50.4862	2.90653	11330	2.28088	401.564	3.38757	845.476	2.68007	700.746
M12-5.1	12.106	45.3926	4.26844	34.9952	189.597	7.31114	4.77105	63.5475	5.92036	4.81873	1.9081	28.4145	764.981	2.5836	0.00892666	34.5835	15.4786	3.61318	0.0984513	14.7706	1.66049	10.4123	3.6682	6.88459	0.186072	15.3986	14.6201	5.1326	5.1511	3.43246	64.7274	2.88995	23.5926	3.05976	109.87	2.45973	24.8773	4.51865	268.211	3.7895	49.2825	2.8738	10364.3	2.0508	352.944	4.13104	768.056	2.69759	699.122
M12-6.1	17.0648	43.6039	3.89411	34.9983	191.152	7.78458	3.27574	65.0211	5.76783	2.81752	2.60996	28.329	780.164	2.57756	0.0045938	44.5009	15.9572	3.30704	0.0939841	22.101	1.94182	10.0081	4.1591	6.76032	0.245396	11.658	16.2457	4.94365	5.48376	3.38887	63.8284	5.27714	24.6189	3.03804	115.396	2.44341	27.1199	4.53487	286.211	3.78151	47.3244	5.77224	10662.4	2.06628	364.69	3.42321	817.128	2.75096	696.895
M12-7.1	10.7793	46.2158	3.73987	35.0011	185.088	7.33194	1.86528	69.0874	5.48654	2.92959	1.60475	28.4933	777.061	2.58968	0.0185921	27.3196	15.693	3.31462	0.0903305	15.0259	1.60926	10.5484	3.66043	9.89394	0.264143	11.448	15.8954	5.01738	5.58231	3.40735	67.4253	2.89095	24.5862	3.05707	119.542	2.45055	27.7688	4.50596	294.146	3.78386	54.1892	2.94375	12242.8	2.07064	421.209	4.07621	899.125	2.68941	692.658
M12-7.2	16.7691	43.9114	3.43074	35.5972	191.997	7.41407	2.16779	67.9229	5.57271	2.91982	1.68134	28.4813	766.051	2.58237	-0.000179918	212.87	15.5207	3.35955	0.0923003	15.2022	1.90441	10.2826	3.55849	7.04379	0.242503	12.0677	15.8893	5.01584	5.18815	3.45836	66.0343	3.4453	24.958	3.20144	114.305	2.46366	26.4844	4.51503	278.803	3.85896	52.0849	2.87545	11731.4	2.05545	393.402	3.41783	849.921	2.75835	693.975
M12-7.3	22.9137	43.9211	3.58336	35.0222	191.697	7.38217	2.4227	66.8988	5.60594	2.87918	1.976	28.4222	769.913	2.58196	0.00539849	42.0152	15.2221	3.3146	0.0871014	15.5277	2.19615	10.6368	3.25989	7.11603	0.259836	11.5146	15.0977	5.02418	5.47964	3.40903	64.0222	2.89643	24.2836	3.05038	112.728	2.45968	25.8666	4.5135	273.652	3.85451	50.2617	4.62886	11659	2.22452	393.053	3.40687	853.758	2.69154	694.478
OGC-1.1	15.7925	44.3627	2.01024	35.0169	95.6653	7.32897	1.80831	67.1525	4.7437	2.76921	55.3695	28.0913	360.995	2.58291	0.0102551	30.096	7.55573	3.42502	0.0342871	33.7149	0.730974	12.2787	1.12036	10.1509	0.459688	9.16614	5.68266	9.60637	1.94203	3.99535	24.0851	3.16078	10.6492	3.29419	63.3917	2.7131	16.988	4.53735	210.474	4.17062	46.8198	2.84333	9615.7	2.04547	84.2761	3.98057	163.035	4.27917	680.538
OGC-10.1	9.86963	46.4973	4.4824	34.9934	201.7	7.32437	1.63501	69.8662	8.75463	2.79826	22.8251	28.2211	728.015	2.58425	3.75781e-18	999.157	10.9101	5.07942	0.0804056	15.9232	1.21018	11.332	2.46881	7.5204	0.880428	8.64309	12.7502	5.18537	4.24455	5.76116	55.0252	3.89625	23.2363	3.05631	116.993	3.08366	27.7032	4.49757	314.701	3.76692	58.4763	3.33878	7630.26	2.08226	77.3729	4.25536	119.196	3.31937	733.762
OGC-12.1	14.4944	44.4094	3.70054	35.0209	120.146	7.33142	2.56195	66.511	5.9704	2.78824	48.1136	28.1025	355.927	2.59179	-0.00407687	47.2076	10.0996	3.3656	0.0313903	25.0971	0.729998	13.6408	1.32142	15.3518	0.434769	9.93225	5.54269	6.37504	2.11911	4.17407	26.5355	5.02634	10.3957	3.47282	56.7187	2.71837	14.54	4.62921	162.299	3.88626	34.444	2.95656	9157.12	2.06172	87.3423	4.16243	148.668	3.20556	699.842
OGC-13.1	14.914	44.4207	1.07108	35.1701	94.215	7.34792	3.31159	65.2206	5.18707	3.002	72.7753	28.0916	752.671	2.77165	0.00733608	37.5663	10.3827	3.36099	0.223206	12.1511	3.69619	9.06576	4.3301	6.79714	1.60237	7.95301	16.119	4.99066	4.80646	3.48917	60.0216	2.92177	22.9384	3.08034	115.012	2.457	28.4264	4.50339	325.258	3.77074	65.4595	2.83908	8724.95	2.06423	158.342	3.75895	181.166	3.11333	687.946
OGC-2.1	8.78723	45.8985	0.172715	35.6639	180.432	9.62631	2.99324	64.4771	10.0279	2.13242	19.8399	28.1085	889.289	2.57469	0.00720154	34.3373	12.786	3.30753	0.0836137	16.3247	1.73447	10.0167	3.85134	9.15827	1.07853	10.285	16.1892	4.80853	5.64811	3.27713	69.6292	2.82225	28.7634	2.94001	147.134	2.33913	34.7004	4.44874	369.325	3.72869	68.8865	2.79821	8266.42	2.05068	71.1221	4.42284	125.495	3.17175	746.371
OGC-3.1	16.6081	45.1451	3.16673	76.1827	114.701	7.31995	4.39087	62.9181	6.44691	2.44802	114.901	28.1006	718.216	2.57584	0.00538437	37.7462	11.1121	3.31736	0.188279	16.5336	3.09251	13.9334	3.71074	6.59751	1.26743	9.9122	13.6869	4.88442	4.31601	3.38259	54.4715	4.56888	22.5976	2.98853	117.434	2.46813	28.676	4.46288	337.373	3.77153	65.3417	3.83955	9261.34	2.11038	126.671	5.84901	184.59	3.13982	706.462
OGC-4.1	21.6104	43.1423	3.48256	35.3642	78.4421	7.62884	2.75299	66.6683	6.23958	3.38709	23.3113	28.2601	288.676	3.35293	0.012037	32.0617	5.679	3.49267	0.0365154	23.6983	0.335757	19.9876	0.871538	11.0682	0.296447	17.0349	4.13998	7.91252	1.52737	4.681	20.8507	3.46014	8.53544	3.69254	46.3851	4.2868	11.3626	6.94194	133.413	4.57746	25.0274	3.16061	8792.61	2.06007	30.3389	5.77507	56.66	4.14761	703.633
OGC-5.1	15.5664	44.864	2.43465	35.033	185.924	7.82469	3.57514	65.5119	8.46391	2.57675	100.561	28.1489	826.166	2.57969	0.0114312	33.4251	11.4931	3.36351	0.101241	15.3552	1.66595	28.1219	3.5381	7.30971	1.05825	13.8624	15.1197	5.14225	5.05015	3.54017	62.8758	2.94666	26.1604	3.08231	131.713	2.45775	31.4509	4.50482	354.891	4.12798	67.4264	3.85389	8196.84	2.06679	86.7873	4.29577	139.808	4.74507	730.674
OGC-6.1	54.2394	41.2778	1.84227	35.0524	148.379	7.32725	7.92548	62.4124	7.1421	2.74696	63.0137	28.1409	551.696	2.58387	0.0098767	34.968	10.0177	3.44342	0.0297161	20.6937	0.852013	13.4207	1.67056	8.84945	0.573486	14.8374	8.77142	5.75329	2.81669	4.11971	38.1706	3.13978	16.9541	3.28102	88.5543	2.5828	21.9631	4.55758	260.317	3.81256	50.7412	2.8959	8868.85	2.0626	74.6826	4.46217	150.435	3.28987	715.432
OGC-7.1	7.97058	48.1684	3.33302	35.0044	133.837	7.3252	1.68439	69.7339	6.12123	2.81059	55.6205	28.0938	391.698	2.58609	-0.00564213	41.2102	9.93699	3.36576	0.0211197	22.4086	0.596564	15.2561	1.39505	9.10173	0.428694	10.0798	5.98631	10.5181	2.10002	4.18679	29.4145	3.40564	12.1114	5.44848	60.3825	5.68599	15.5303	4.61049	176.406	3.86485	34.1344	4.05043	8162.72	2.56176	76.8799	4.29308	126.017	3.29534	701.983
OGC-8.1	15.4825	43.9298	0.362542	35.3557	225.913	7.44737	3.62622	64.4516	10.0729	2.62886	45.4957	28.1021	2029.4	2.57222	0.0783672	21.963	18.8675	3.29109	0.508496	10.8336	9.00915	8.26126	13.9456	5.99951	3.80948	7.46891	57.1361	4.3543	18.0653	2.98993	203.132	2.73777	69.4394	2.81288	300.705	2.66798	61.7955	4.42024	615.34	3.73791	100.015	3.46755	7575.55	2.08287	195.418	3.62222	187.311	3.28127	746.791
OGC-9.1	30.1196	42.7331	0.868838	39.581	72.3193	7.36105	4.63759	63.508	3.39314	4.20603	84.4969	28.093	492.652	2.58199	0.00538439	41.4719	8.64052	3.70555	0.0546053	30.5665	1.4568	10.8257	2.695	12.3727	1.13474	8.62732	9.42493	5.48292	3.16486	3.74481	39.2726	3.78291	14.2515	3.47784	77.168	2.5704	19.1615	4.55505	234.229	3.80663	47.3042	4.04086	8935.3	2.07348	124.579	5.82405	166.38	3.32844	653.749
OGU-1.1	16.8963	44.5859	11.4854	34.9706	237.164	7.6103	1.17171	70.6473	9.03763	2.16528	47.0664	28.0927	759.612	2.57536	-0.0167402	25.9	9.35459	3.33431	0.0995672	13.8305	1.48829	10.3126	3.27124	9.83064	1.09601	10.9895	13.5325	5.17993	5.22017	3.28682	64.5656	3.28716	26.1308	3.05119	120.286	2.3681	25.7957	4.49841	292.693	4.15053	50.0109	2.86555	8687.31	2.0474	62.1834	4.22926	83.4486	3.39322	736.688
OGU-10.1	17.0963	43.588	6.70568	34.993	210.848	7.30727	21.0514	87.6922	8.57663	2.44074	43.1335	28.097	1112.23	2.61305	0.0160449	28.1044	11.9974	4.00428	0.256979	11.7662	4.10484	8.88878	6.31911	8.02958	1.71376	7.8877	26.6396	4.64134	8.00714	3.21959	98.2421	2.79752	36.3957	2.93258	157.974	2.46145	35.6263	4.46726	367.647	3.75023	62.1391	2.83839	7603.17	2.06179	115.228	3.92418	119.146	3.34095	731.881
OGU-11.1	8.44136	47.934	0.305463	35.4619	141.67	7.32454	1.90676	68.8867	7.62704	2.56336	17.7684	28.1195	1259.97	2.57861	0.0430918	26.8291	13.3199	3.33128	0.346065	11.3463	5.52419	8.63803	7.69347	7.90984	2.10095	7.78177	28.3628	6.47509	9.03681	3.92797	107.424	2.81682	40.5028	3.38809	202.726	2.3314	45.1577	4.45031	470.441	3.75358	88.8846	2.80082	8910.67	2.06353	194.777	3.65905	197.26	3.07983	721.274
OGU-12.1	24.2669	43.3389	0.667582	35.2098	197.619	7.31372	6.90486	62.6368	9.88686	2.39418	36.3053	28.1018	1761.63	2.60867	0.0583122	23.0803	16.2494	3.3172	0.478615	13.1164	7.07911	8.49411	11.3536	5.98237	3.43196	7.55264	51.9321	5.21889	15.2342	3.05383	172.917	2.73362	60.8357	2.85337	272.617	2.29634	56.245	4.43606	559.823	3.72275	98.5703	2.79613	8177.56	2.06915	187.152	3.71037	177.496	3.15582	745.04
OGU-2.1	15.8284	44.6399	0.114279	35.9874	170.588	7.41469	1.74934	67.2098	10.4048	2.049	24.0654	28.1025	1445.88	2.68673	0.0386276	41.4971	14.505	3.29307	0.336922	11.4147	6.03702	11.3755	9.88764	5.87424	2.6952	8.44739	39.9471	4.38793	12.3109	3.95715	139.454	2.71422	50.3499	3.42121	222.01	2.26995	47.8729	4.41939	482.223	3.70487	82.908	3.33894	8278.89	2.13945	154.942	3.62269	137.033	3.31107	749.851
OGU-3.1	14.5131	43.1677	0.86085	35.1505	139.339	7.31176	2.34333	65.3262	7.3977	3.79669	36.7181	28.0954	1176.37	2.64861	0.0405905	24.4951	13.1366	3.29974	0.356741	14.6513	5.47005	8.40634	7.72365	7.3683	2.16205	7.58628	27.0525	5.77504	8.57116	3.10227	97.5768	2.8119	38.28	2.86362	186.027	2.29296	41.98	4.4277	465.608	3.73593	81.172	3.02272	9024.73	2.04601	159.654	3.60185	184.858	2.96333	718.55
OGU-4.1	14.0967	45.3926	6.74214	34.9873	173.837	7.32194	3.31648	65.9238	8.20554	2.69655	18.9036	28.1241	697.983	2.61811	0.0125346	32.3323	9.38496	4.14904	0.0784346	16.8302	1.30478	11.8232	3.16286	7.39996	0.902251	8.73131	14.7104	5.2086	4.90881	3.60346	62.017	2.97169	23.734	3.15143	106.777	2.53115	23.98	4.56781	260.088	3.83584	44.4586	2.93705	8501.15	2.06871	57.2653	4.93382	72.8368	3.9341	727.856
OGU-5.1	20.2722	45.4114	3.70581	35.0085	106.889	7.64613	18.0741	66.1828	4.71888	2.96341	94.0558	28.1425	337.878	3.16508	0.0103115	31.2319	9.45803	3.86757	0.0420997	21.2822	0.630765	14.6167	1.09936	16.5726	0.448927	9.63282	5.33559	6.29667	1.73769	7.38788	23.5416	3.26396	9.99673	3.4284	56.8917	4.35646	14.8017	4.59896	189.342	3.83016	39.2268	2.89796	9656.57	2.21284	123.17	5.12951	240.361	2.94101	680.107
OGU-6.1	16.7143	44.8116	2.46905	35.1874	160.45	7.31146	2.42019	65.8799	8.0875	2.33359	49.4491	28.0986	1099.4	2.67937	0.0100372	31.2319	11.7793	3.56233	0.250936	11.6473	4.50794	8.66812	7.46942	7.38599	1.86516	7.73312	26.8803	4.56503	8.45289	3.14304	92.9303	2.85056	36.1268	3.61845	164.433	2.40494	36.2172	4.64147	365.739	3.9543	65.7293	2.80908	8242.8	2.05352	113.377	3.8453	117.007	3.24829	726.545
OGU-7.1	14.173	44.2458	2.49836	35.2763	146.587	7.44624	1.40425	70.9356	7.37468	2.53339	19.2124	28.1138	845.754	2.58209	0.0259057	32.9428	10.7222	3.3449	0.18673	12.4149	3.11833	9.25819	5.36177	6.44689	1.53798	8.00322	20.1806	4.78165	6.45097	3.29728	72.5568	2.84894	27.7143	2.98777	124.054	3.20275	28.5913	4.48999	306.757	3.76668	56.7101	2.8461	8154.76	2.07801	98.2706	4.0197	107.623	3.37418	718.273
OGU-8.1	17.5675	43.4209	1.30241	42.3271	205.653	7.64307	6.77855	62.5813	12.3407	2.10414	49.5174	28.1011	1862.04	2.57616	0.222283	18.8823	16.9659	3.30003	0.55032	10.7834	8.53406	8.33413	12.1446	5.88607	3.27393	8.75986	50.0577	5.28026	16.0342	3.72419	177.513	2.71387	65.5315	2.81979	266.823	2.33489	57.9919	4.6606	581.024	3.70899	97.2159	2.98661	7390.77	2.08161	208.027	3.58871	180.689	3.09422	766.262
OGU-9.1	9.71733	46.5656	0.341677	35.38	138.324	7.34544	2.66613	66.1426	7.57059	2.49652	39.5786	28.0979	1172.32	2.57902	0.0379583	28.2179	12.5746	4.53665	0.288071	12.2054	5.17594	8.68634	7.99965	6.13102	2.3397	7.88721	29.8231	7.92267	8.38598	3.19627	103.668	2.81184	40.0579	2.94273	174.023	3.75534	39.0429	4.48053	404.618	3.7625	72.7348	2.84638	7890.03	2.58622	143.952	3.78536	138.883	6.8355	720.61
QNC-1.1	15.0012	43.5566	0.112381	40.2026	210.875	7.30382	1.80149	67.8368	17.6285	1.81854	4.46117	28.2049	1341.17	2.57334	0.0293054	69.9301	17.8247	3.28596	0.384585	10.9655	6.61395	9.93612	12.5231	5.81966	1.83911	7.72783	42.9528	4.39767	12.8949	3.03132	141.357	2.72423	46.1412	3.24875	196.216	2.30224	38.5343	4.44448	355.137	3.73884	54.0392	2.87757	9953.05	2.04764	208.98	3.54664	193.843	2.99444	802.321
QNC-10.1	16.5212	44.1324	0.0650376	43.2199	213.183	7.39427	0.462867	92.6422	15.8254	2.01322	4.39659	28.2377	1304.35	2.58518	0.125939	20.3458	17.4812	3.34723	0.593319	14.4041	9.11444	8.33601	12.4323	5.92473	1.69727	7.94003	42.4147	4.62188	12.7732	3.09243	137.421	2.76047	45.5519	2.90469	190.024	2.35021	36.2976	4.47672	340.334	4.60736	56.4206	3.33989	9882.73	2.06146	230.575	3.60258	222.539	3.03896	791.149
QNC-11.1	14.3072	44.5723	7.82606	34.9801	212.978	7.45547	0.879887	77.9909	16.9079	3.13601	3.85911	28.2517	711.829	2.76847	0.0161153	28.4284	11.5919	3.40012	0.216601	12.1749	3.70513	9.0828	4.96579	6.62309	0.784962	8.76723	20.2057	6.39105	6.17957	4.57732	69.6768	2.88058	24.7576	3.05139	107.583	2.47702	21.3315	4.54828	203.138	3.8453	34.8172	2.9598	10079.8	2.05872	112.308	3.99938	128.429	3.30435	797.972
QNC-12.1	15.4153	44.2458	2.05383	38.9686	234.341	7.3067	1.39452	71.9019	20.6958	18.1935	3.99591	28.2459	1297.08	2.57844	0.0911152	21.0217	16.7163	3.3083	0.536645	10.8197	7.57486	8.3987	11.3895	5.94415	1.79781	7.88325	41.4229	4.61474	12.4995	3.08657	135.55	2.75522	44.7563	2.89544	190.995	2.34282	36.9672	4.46931	336.905	3.76519	57.4398	2.85705	9113.54	2.08343	219.316	3.60912	206.204	3.0496	819.369
QNC-2.1	14.426	43.6934	6.81043	34.9791	264.242	7.44496	2.06546	66.8332	8.82187	6.17108	14.9911	28.1362	819.334	2.72629	0.00418973	43.5042	19.6982	3.27989	0.0520883	17.9675	1.31561	10.8735	3.0914	7.09314	0.375278	9.89199	15.7253	4.94989	5.68691	4.29774	73.7291	4.11154	27.7629	2.95773	128.973	2.37917	26.8815	4.48373	266.163	3.82591	45.0494	2.93747	12039.7	2.4354	191.466	3.57545	288.595	6.15481	734.464
QNC-3.1	11.1284	45.0582	0.0776947	36.6185	263.7	7.30997	2.01236	67.2099	16.4277	1.86025	4.44781	28.2076	791.54	2.57664	0.0155951	27.3963	21.2882	3.42603	0.119332	13.3783	2.19907	13.1938	4.54173	6.49724	0.552856	9.77414	19.8443	4.73344	6.76637	3.23562	77.4023	2.81971	26.9005	2.97785	118.879	2.40219	24.1594	4.53841	236.968	3.85499	39.3101	3.56538	10000.3	2.05949	213.866	4.41296	236.763	3.06925	794.99
QNC-4.1	27.7222	43.2482	1.87068	35.0431	235.408	7.42931	4.23607	63.9749	10.7684	6.91565	19.6566	28.1313	1846.43	2.57308	0.124178	20.4304	29.2416	3.26867	0.731692	10.5989	9.76546	8.24735	13.8236	5.87836	1.64804	8.22709	50.4459	4.40311	15.7364	3.02661	169.005	2.73949	63.1348	2.83161	259.7	2.28708	51.2854	4.43451	485.23	3.72789	80.0441	2.80907	9710.41	2.05453	507.177	3.35014	584.532	2.74955	753.113
QNC-5.1	14.4234	44.0241	1.14512	35.08	245.961	7.30203	6.94618	62.3236	12.2018	2.07113	6.00769	28.2273	730.902	2.5773	0.0322573	28.1531	12.3672	3.32543	0.0865817	14.8871	1.68241	10.329	3.84019	6.7523	0.730664	9.37185	19.3076	8.25818	6.20436	3.29406	68.4382	2.85631	24.9219	3.01156	99.2711	3.07104	19.2102	4.54549	186.125	4.73735	31.1271	2.95949	7429.11	2.30874	93.7892	4.37529	101.772	5.93351	765.157
QNC-6.1	15.3888	43.7353	0.0847294	37.3634	219.489	7.39482	1.39705	70.6473	16.0566	1.89672	6.55188	28.1712	1442.28	2.74096	0.134756	19.7873	20.2298	3.31139	0.730493	10.5135	9.35201	8.22556	14.1288	6.93778	2.00491	7.72413	46.9289	6.7969	13.7612	3.03375	145.256	2.72895	49.2624	2.85504	193.705	2.31469	37.5907	4.45254	355.226	3.74408	57.9758	2.83336	8904.19	2.05301	241.801	4.94189	259.698	4.32502	792.637
QNC-7.1	11.2074	46.154	0.0341099	39.2039	221.177	7.46009	1.48613	71.5615	12.9721	2.13352	8.18006	28.166	700.604	2.72153	-0.0101236	33.643	22.6238	3.31892	0.0518334	19.7978	1.04038	12.3858	2.84665	7.50606	0.430853	10.227	15.8486	5.01927	5.45879	3.44114	65.4979	2.90554	23.3939	3.08557	106.886	4.37936	21.821	4.55082	213.862	3.8397	36.4429	3.54274	10819.3	2.07714	205.118	4.84501	268.682	2.95968	771.161
QNC-8.1	15.381	44.2884	0.132558	36.1071	153.034	7.34409	1.40421	71.9019	9.93198	2.33771	4.45624	28.725	838.317	2.58122	0.0122019	31.2319	18.6648	3.3	0.0418752	20.487	1.04008	12.0627	3.27402	7.19338	0.422484	10.076	16.3999	6.91625	5.85089	3.45343	77.5988	2.85754	28.2549	3.01459	127.206	2.43254	26.7849	4.58041	246.276	3.88355	40.6072	2.98365	12022.7	2.07123	194.566	3.66224	249.418	2.9761	745.467
QNC-9.1	12.6618	45.6792	0.0893982	36.8946	209.362	7.59224	1.86398	69.747	10.2298	2.35891	3.16239	28.4123	1226.76	2.57945	0.000673356	114.764	16.05	3.3188	0.24755	12.06	4.82881	8.84435	9.0578	6.14597	1.60309	8.36356	38.0969	4.52724	11.545	3.12939	128.483	2.77596	42.8767	2.92107	179.665	2.36811	34.2875	4.48794	318.713	3.78268	53.5119	2.88414	10001.4	2.06218	202.716	3.67262	176.07	3.16655	748.248
QNU-1.1	20.3301	44.2223	30.5476	35.1932	390.596	7.29325	3.75857	64.1007	16.7213	2.81116	21.644	28.1095	833.877	2.58211	-0.002787	53.7131	15.3538	3.30453	0.085857	15.2409	1.41194	10.679	3.15785	7.05651	0.419045	9.88272	16.8181	4.88559	5.83026	4.49351	72.1068	4.34268	27.8552	2.9811	129.139	2.39836	26.8357	4.49433	270.314	3.77818	45.515	2.87476	10306	2.06455	84.6944	4.11883	133.572	3.47846	796.821
QNU-1.2	15.4054	43.7438	13.9717	34.9951	297.828	7.417	2.69315	65.6923	15.4319	2.19606	16.2367	28.5201	785.064	2.57708	-0.00905752	33.2135	16.1516	3.29848	0.0813011	15.5875	0.908766	12.165	2.77241	7.25772	0.374716	10.0594	15.4798	4.91848	5.81256	3.32684	70.2536	2.84448	27.5363	2.98107	118.718	2.41138	25.2642	4.49939	257.194	3.84422	43.5647	2.9622	10429.2	2.17104	105.202	5.74184	159.387	4.66735	788.576
QNU-10.1	27.816	42.8021	0.0948327	36.7929	212.257	7.42317	3.06432	65.752	12.1328	5.36987	5.1311	28.2135	1215.1	3.23899	0.0104161	33.2136	23.7931	3.98387	0.0880658	15.219	1.67717	10.558	4.45966	6.72625	0.629888	9.86847	27.5802	4.86173	9.24973	3.18617	113.487	3.19904	40.7526	2.91972	180.504	2.35584	35.2406	4.47683	330.45	3.82675	55.6601	2.94133	10869.5	2.07033	250.809	3.55777	261.944	2.96346	764.604
QNU-2.1	16.5055	43.4577	0.303573	35.648	343.189	7.37306	2.00998	67.5498	23.6193	1.71584	5.0974	28.2493	895.515	2.57614	-0.00412472	45.2154	19.5991	3.28572	0.192287	12.3682	3.34813	9.04312	5.61135	8.45822	0.841978	8.50026	24.6508	4.64556	7.85	3.20146	86.956	2.8063	31.3402	2.94802	133.165	4.08068	27.4654	4.49146	259.497	3.78263	42.2468	4.53352	8981.33	2.05408	157.369	7.2815	153.397	3.36809	833.824
QNU-2.2	14.2506	43.9391	0.0751615	36.7426	250.043	7.31238	3.01988	64.9269	15.7314	1.89875	5.45679	28.1886	701.128	2.66017	0.016926	26.8841	19.8524	3.3104	0.129021	23.2763	2.10122	9.80088	4.21254	6.6292	0.468243	9.40327	16.0634	4.87895	5.38502	3.33858	66.7464	2.85103	24.2758	3.01138	103.035	2.44025	21.0504	4.86341	203.906	4.38802	34.2299	2.98936	9861.65	2.11763	136.124	3.99954	178.858	4.74766	790.539
QNU-3.1	11.5113	46.154	0.0183748	42.6879	235.454	7.37323	3.95303	64.627	23.2684	3.58669	3.08657	30.6898	648.97	2.58772	-0.0242937	25.7655	16.0862	3.78741	0.0410628	43.0688	1.11076	12.3652	2.67842	13.1543	0.395961	16.0827	14.8507	5.13486	4.99325	3.50791	58.1769	2.95628	21.6155	3.13015	91.9094	2.55081	18.2111	4.59845	180.794	3.88084	30.5513	3.01333	7934.74	2.06563	86.9872	4.71194	125.998	3.37609	832.167
QNU-4.1	12.5203	44.9594	0.141645	38.5536	193.412	7.30923	4.56932	63.5384	13.5306	3.26997	3.97695	28.2387	596.207	2.57982	0.00844403	34.7096	16.2689	3.34149	0.039673	38.6556	1.05398	11.8976	2.00396	8.0144	0.236189	13.2975	11.6809	5.20853	4.06211	3.55247	49.6355	2.9623	19.4746	3.1292	87.3945	2.52583	18.5258	4.56493	182.29	3.8522	31.7219	2.96637	9805.54	2.06266	87.0443	4.13823	126.789	3.5599	775.336
QNU-5.1	16.6345	43.9765	0.0276076	40.0613	157.181	7.34263	2.3402	67.4101	16.6923	1.96224	2.27728	28.3781	554.219	2.58582	0.0141301	29.8428	12.2616	3.34198	0.0420984	20.4302	0.951295	12.7173	2.242	7.92512	0.352229	10.6198	11.1739	5.34508	4.29099	3.57124	51.7033	2.97472	18.8175	3.16282	85.1343	2.56115	17.9288	4.59161	172.586	3.98426	29.9295	3.90613	9966.64	2.06039	64.3341	10.3529	101.547	3.4919	796.642
QNU-6.1	11.1536	46.0933	0.0832376	36.8765	153.705	7.32179	0.651008	83.9293	6.95876	3.16776	3.54105	28.2748	702.036	2.58331	-0.00997809	33.643	17.0951	3.30838	0.0207839	22.9593	0.877992	13.2366	2.33184	7.83321	0.268828	11.7961	13.2173	9.86122	4.78071	3.76332	62.5067	2.91645	23.6957	3.0785	110.074	2.47665	22.6233	4.54348	222.41	3.83061	37.687	2.94594	11321.5	2.24437	120.833	5.21341	172.972	3.15756	713.139
QNU-7.1	14.4184	44.8374	0.0305678	39.7632	314.705	7.40947	1.89256	69.4057	19.6805	1.88617	5.03998	28.2854	881.493	2.58156	0.0129791	31.078	21.0538	3.52493	0.168278	12.9989	2.45399	9.78556	5.64123	9.01065	0.867122	9.27357	24.163	4.74607	7.44927	3.34735	85.5722	2.84509	29.9465	3.01168	133.551	2.43239	26.8688	4.5192	256.094	3.81358	43.772	3.01759	10086.3	2.06164	188.289	3.7031	205.247	3.07914	813.966
QNU-8.1	10.8932	46.0534	0.0478982	38.552	267.93	7.35861	1.22465	73.2687	12.105	2.16651	10.2962	28.1452	861.928	2.68713	0.00369719	49.5633	27.0973	3.27414	0.0945063	15.0481	1.93211	10.1909	4.05335	11.0608	0.39122	10.2289	20.5588	4.81165	6.82292	3.30116	80.7643	3.46691	28.6582	3.00386	130.647	2.42095	27.7042	4.56911	257.73	3.80146	45.0339	2.89882	11312.1	2.05525	268.136	3.5216	330.36	2.87815	764.382
QNU-9.1	13.666	44.7979	0.0692194	37.1567	279.838	7.31456	0.307665	103.564	11.3065	2.20637	7.63083	28.1679	1032.61	2.74984	0.0275768	31.1949	22.9336	3.28407	0.225233	12.1032	4.12685	8.93717	6.409	6.33858	0.757534	8.82794	26.3284	4.66113	8.68755	3.20014	98.4876	2.88528	35.0333	2.94749	153.532	2.3828	31.2691	5.00825	275.057	3.85683	48.5527	2.88496	10488.6	2.17888	239.886	3.56622	270.847	2.94498	757.779
T2C-1.1	16.3711	45.1431	1.68848	35.0671	124.587	7.4114	3.33795	64.0792	5.21369	2.70691	0.885785	28.7059	1016.55	2.67613	0.0162502	26.5193	3.31477	3.57058	0.0455214	18.0274	1.02817	11.3407	2.96287	6.96297	0.971881	8.19168	20.8295	4.67072	7.33979	3.18901	91.4377	2.78059	33.8119	2.99458	158.193	2.3327	33.5131	4.78372	334.599	3.73814	57.0901	3.20003	9849.61	2.04609	115.767	3.79815	236.086	3.05927	688.374
T2C-10.1	13.3331	44.9873	15.1143	34.9764	195.148	7.33023	0.40023	95.5936	9.23112	2.38618	73.7736	28.0915	1934.44	2.57652	0.0333765	29.8343	3.73208	3.60217	0.280565	11.6907	4.23128	8.94671	7.28158	6.24462	2.46802	7.67284	40.5768	4.47929	14.6718	3.04943	182.455	2.72158	66.994	3.1012	310.435	2.27191	62.4507	4.42518	585.331	3.71522	100.286	2.78933	8445.19	2.06543	198.524	3.65329	298.807	2.91201	738.645
T2C-11.1	17.1458	43.8129	10.4421	34.9755	222.872	7.49599	2.32242	67.4101	9.34285	2.38533	65.4005	28.0928	2112.7	2.57629	0.064308	22.6376	4.2656	3.55773	0.315744	11.4784	4.52254	8.82697	8.85126	6.11297	2.52095	7.66345	45.6207	4.43927	16.8997	3.02229	201.743	2.71175	73.2569	2.8204	336.237	2.26436	68.1785	4.41943	612.208	4.29963	104.986	2.78589	8073.11	2.0672	184.84	3.68896	279.498	2.94213	739.761
T2C-12.1	20.3259	44.6537	0.261228	35.5956	191.224	7.31325	3.43937	65.086	6.20913	2.83502	0.32951	30.0493	892.653	2.58092	0.00398144	48.5708	3.19734	3.66874	0.0363076	22.2607	0.701742	13.9967	2.03947	8.05846	0.661138	9.1104	12.6	5.22535	5.12383	3.46361	70.2873	2.88505	28.6043	3.01632	149.897	2.39386	35.2672	4.93387	348.178	4.02822	63.9301	2.91007	9203.92	2.08371	103.562	4.07188	291.549	2.92506	703.211
T2C-2.1	17.6595	43.9002	0.65809	35.5819	214.463	7.30197	2.54774	65.3262	8.54849	4.40467	1.22372	28.5173	1253.91	2.57696	0.00266923	51.7889	4.47389	3.48052	0.0451549	18.377	0.752312	12.3195	3.20316	7.00174	0.869867	8.31265	18.4907	4.74672	6.92752	3.19794	94.0934	2.83918	42.2106	2.86021	218.079	2.28293	49.5417	4.45214	512.052	3.95697	93.0064	2.81103	8889.35	2.06552	119.482	4.00837	370.688	2.79047	731.581
T2C-3.1	12.4407	44.3981	2.2079	35.1844	183.757	7.30746	2.38035	66.0135	7.23741	2.4559	0.89006	31.0897	777.294	2.57642	-0.0129241	28.8255	3.71035	3.54391	0.0317183	24.0764	0.995971	11.6639	2.29408	7.52766	0.547065	9.08186	11.5775	5.26861	4.97574	3.36826	62.975	2.86136	26.6617	2.97062	124.496	3.47381	27.3564	4.48189	280.995	3.76217	48.6946	2.84866	9369.49	2.05847	182.236	3.58931	372	3.35373	716.606
T2C-4.1	14.4574	44.0629	4.98231	34.9884	159.02	7.31512	1.376	70.9356	8.17629	2.41657	0.915278	31.0248	656.744	2.5849	-0.00224764	59.3966	3.08118	4.95998	0.0249613	20.3556	0.472122	16.1041	1.99566	7.96619	0.468752	13.4892	9.93611	5.35927	4.06055	3.55427	51.6815	2.97631	20.7292	3.07528	102.101	2.46061	22.903	4.51911	232.064	5.10401	41.032	2.89249	8367.71	2.0673	76.0622	4.20631	184.144	3.06047	727.533
T2C-5.1	7.45425	47.8693	11.0369	34.979	266.274	7.31067	2.81764	65.3583	6.20992	4.63567	6.69965	28.3703	800.737	2.58183	-0.0104734	31.3896	2.63086	3.6843	0.0373002	21.0078	0.722673	30.8487	2.17002	7.71662	0.48917	9.36187	11.7583	5.14054	4.84676	3.40416	64.2223	2.8674	26.6945	3.03169	125.747	2.39927	27.1728	4.49091	272.17	3.77232	48.1012	2.93413	8447.2	2.05508	62.1716	7.30759	160.049	3.1051	703.222
T2C-6.1	13.1912	44.4434	0.468866	35.24	195.784	7.4559	3.77251	64.0792	8.09808	2.38402	1.03357	33.2464	1056.82	2.57483	-0.0102562	31.8016	3.79218	3.5525	0.0348941	23.6801	0.920929	12.253	2.94442	13.9015	0.824826	8.57238	15.0593	4.95233	5.88044	3.31139	78.9079	2.84977	34.4018	2.92532	169.61	2.81923	37.3194	4.45435	390.002	3.73593	68.5724	3.29578	7808.36	2.33496	94.8065	4.02382	267.636	2.90297	726.663
T2C-7.1	13.7763	44.8241	8.36334	34.9884	160.557	7.31975	1.05397	75.467	5.74327	2.87668	12.6915	28.6421	1642.55	2.86421	0.024828	25.2701	3.9686	3.58415	0.200387	12.3169	3.53272	9.12948	7.13264	6.24837	1.75713	7.88127	33.8416	4.55363	12.189	3.09916	152.564	2.74242	57.0268	2.85537	258.044	2.35609	54.3875	4.43433	522.204	4.14093	89.8506	3.43588	9703.6	2.06029	273.199	3.52702	445.596	3.28649	696.532
T2C-8.1	16.1519	44.0629	3.21645	35.0078	214.197	7.3094	0.690662	82.513	9.11546	2.40441	20.7037	28.1297	943.765	2.58023	0.00161427	72.8949	3.04862	3.68277	0.0424235	20.543	1.00445	12.1309	2.61093	7.50275	0.73435	8.90066	13.6968	5.15328	5.35171	3.42354	73.6034	2.86895	30.8508	2.98757	160.543	2.3774	35.9893	4.47417	383.162	3.80154	69.9626	2.89189	8439.42	2.06532	74.4674	6.84999	230.133	3.00836	737.479
T2C-9.1	10.932	46.1951	15.264	34.9712	169.975	7.31758	2.89565	66.0135	6.73958	3.19096	56.2052	28.0945	1625.32	2.60318	0.02286	25.8727	3.77875	3.60609	0.224743	12.0366	3.82979	9.0578	7.35278	6.24636	1.84961	9.45461	32.3022	4.5727	11.7369	3.10785	150.231	2.74373	55.7595	2.85988	259.599	2.29533	53.4128	4.4368	498.282	3.72878	85.4578	2.85693	8979.47	2.06348	189.005	3.67678	287.276	3.08448	710.331
T2U-1.1	14.8492	43.2868	0.0279162	39.6246	237.528	7.46094	2.57753	65.119	16.2545	1.81192	2.17103	29.1074	2560.15	2.58411	0.0625008	24.4751	4.63029	3.4555	0.370471	10.9787	5.87907	9.69164	13.7978	8.10082	3.15072	8.11439	72.4527	4.26988	22.9935	2.92602	270.381	2.6921	96.6118	2.76144	407.927	2.21863	80.6126	4.40471	741.435	3.81692	118.276	2.75291	7180.42	2.41193	119.957	3.7701	181.998	4.01637	793.898
T2U-10.1	15.3404	44.4434	1.03265	35.1878	154.789	7.34528	4.61685	63.8757	9.70396	2.38854	0.527308	29.3815	1634.75	2.58302	0.0439292	26.3516	3.72942	3.61798	0.262351	11.886	4.4144	8.92221	7.23137	6.29741	1.6201	7.97539	38.0258	4.51439	12.7207	3.12828	155.228	2.79845	56.4218	2.89135	249.36	2.30432	52.1759	4.44061	499.819	3.76841	87.0065	2.85967	8145.84	2.09171	142.407	3.85504	270.789	2.96108	743.292
T2U-11.1	14.2071	44.6331	1.55406	35.057	117.253	7.33397	0.995082	76.1893	6.44544	2.73646	0.398537	29.8497	1165.76	2.58506	-0.00890115	34.8377	4.14495	3.56951	0.208644	12.2974	3.01712	9.36404	5.44035	6.50209	1.16927	8.25583	24.1003	4.71353	8.16122	3.22619	101.856	2.80098	39.2471	2.92729	185.463	2.34695	41.3229	4.45767	426.009	3.78492	75.8292	2.87555	8975.74	2.24865	99.1966	4.07977	200.057	3.06709	706.442
T2U-12.1	13.9881	44.9456	1.13381	35.4957	117.662	7.33645	2.38378	67.4793	7.51515	2.62501	0.494096	29.4663	1158.9	2.58599	0.0223583	26.2425	3.76922	3.61148	0.189045	12.6165	3.55721	9.21675	5.74179	6.50198	1.0975	8.45291	25.0989	4.71948	8.20763	3.23762	97.0363	2.90104	37.2636	2.94511	177.837	2.36302	39.9989	4.46584	389.448	4.31447	67.8641	2.90381	8397.68	2.06721	78.1347	4.35902	157.866	3.21036	719.954
T2U-13.1	21.362	44.5999	0.630239	35.1999	126.02	7.33049	1.20322	73.6928	8.93422	2.82729	0.575277	29.262	1206.41	2.57865	0.0114569	31.8872	3.45173	3.63534	0.20817	12.3258	3.90539	9.05516	6.44027	6.35327	1.05554	8.91301	26.6286	4.66844	8.8281	3.20162	110.353	2.78784	40.5292	2.91957	193.132	2.34027	40.0575	4.46137	411.098	3.74459	71.0029	2.82715	8463.77	2.06513	64.3371	4.51214	138.399	3.27495	735.627
T2U-2.1	12.8923	43.8751	6.12197	34.9798	166.897	7.3226	2.30008	65.752	12.9814	1.93461	1.59402	28.5571	638.181	2.64259	0.0171455	25.9551	2.1407	3.7251	0.0720076	15.3621	0.882697	11.8028	2.41062	7.21749	0.651793	9.2531	13.1508	4.9265	4.746	5.2667	54.065	4.76854	21.8601	3.00704	103.163	2.41293	23.587	5.78298	251.964	3.76684	44.9725	2.89879	7499.58	2.0532	24.4646	6.2911	75.7192	3.83275	771.233
T2U-4.1	13.2801	43.588	5.28499	34.9817	122.15	7.3373	1.52356	68.2485	10.1482	2.08153	1.1833	28.505	455.536	2.71564	-0.0112105	29.0358	2.89522	3.58287	0.00712302	31.7435	0.390401	28.1106	1.50431	8.24674	0.295781	10.3625	8.94408	5.36591	2.95971	9.01201	38.5571	2.96479	15.1344	3.12183	76.906	2.61329	16.466	4.54154	173.273	3.81519	31.03	3.0063	8640.74	2.06268	24.9346	11.3391	85.1083	3.40887	747.493
T2U-5.1	17.7648	43.2463	7.28538	35.6868	129.431	7.3225	3.85321	64.0579	9.94546	2.56038	1.10439	33.0613	445.404	2.73584	0.00735127	36.0926	2.81469	3.66264	0.0341768	22.972	0.551992	14.5272	1.70457	8.21652	0.21309	12.1651	7.49127	5.68	2.82706	3.7969	34.9095	3.0613	14.5562	5.61602	68.71	2.58977	15.6958	4.58685	165.846	3.8571	30.5342	3.90249	7458.92	2.0598	23.5733	6.03441	74.0747	3.63929	745.595
T2U-6.1	13.2814	44.4664	0.897578	35.1115	126.774	7.32377	2.81737	65.5119	9.57077	2.26774	1.1491	28.6007	1331.04	2.648	0.00707795	36.5567	3.97241	3.53938	0.212167	12.0538	3.99006	8.91618	6.53709	9.72714	1.28848	8.06062	28.8142	4.6211	9.90843	3.12107	115.388	3.1366	44.7127	3.49105	192.146	2.31933	42.476	4.44421	424.228	3.72905	70.5981	3.04396	7723.17	2.05805	78.831	7.08896	153.703	6.97872	742.002
T2U-7.1	17.8221	43.2264	10.973	36.242	156.877	7.53317	4.18541	63.7264	11.4336	2.11856	1.24223	28.5606	474.426	2.64547	0.0141875	28.7233	2.45451	3.72953	0.0372576	20.2934	0.735364	12.9036	1.66243	15.7054	0.413742	16.9739	9.51381	5.3768	3.43556	6.20333	41.6045	2.99717	15.4346	6.05392	72.1523	2.57315	15.4971	4.59438	170.982	3.94196	29.2836	2.97688	7588.21	2.05944	27.2906	9.49029	67.6411	3.73026	758.855
T2U-8.1	18.5931	43.3422	2.22949	35.026	124.469	7.32851	3.05941	65.4737	7.92524	2.48114	1.20324	28.6074	1295.85	2.57437	0.0258607	71.2497	4.01826	3.5674	0.263638	11.7099	4.01461	9.03381	6.53263	6.30107	1.23628	8.16795	25.4047	4.67144	9.05339	3.17248	109.853	2.77894	44.1169	2.89529	198.854	2.32842	44.1444	4.44797	457.414	3.77287	78.6324	2.86306	7774.01	2.18442	91.0734	4.12631	198.261	3.2693	724.716
T2U-9.1	9.36569	47.0567	2.47309	35.0208	134.194	7.32645	1.44317	71.3984	8.21936	2.48974	0.609121	29.1731	1404.57	2.57766	0.035826	27.8127	4.00577	3.7175	0.254282	11.7998	3.6272	9.07249	6.21653	6.71728	1.41057	8.06774	28.0484	4.62965	9.65909	3.16293	125.175	2.76684	47.4364	2.8827	222.859	2.31542	48.0542	4.44341	473.131	4.03521	83.2888	2.85737	8853.9	2.06292	153.531	3.77276	293.702	2.91805	728.009
Sample Name	F ppm	1sd Fppm	Al ppm	1sd Al ppm	P ppm	1sd Pppm	Ca ppm	1sd Ca ppm	Ti ppm	1sd Ti ppm	Fe ppm	1sd Fe ppm	Y ppm	1sd Y ppm	La ppm	1sd La ppm	Ce ppm	1sd Ce ppm	Pr ppm	1sd Pr ppm	Nd ppm	1sd Nd ppm	Sm ppm	1sd Sm ppm	Eu ppm	1sd Eu ppm	Gd ppm	1sd Gd ppm	Tb ppm	1sd Tb ppm	Dy ppm	1sd Dy ppm	Ho ppm	1sd Ho ppm	Er ppm	1sd Er ppm	Tm ppm	1sd Tm ppm	Yb ppm	1sd Yb ppm	Lu	1sd Lu ppm	Hf ppm	1sd Hf ppm	Th ppm	1sd Th ppm	U ppm	1sd U ppm	T (Ti)
G8 Median	46.4606	10.7431	1.54489	0.137619	81.4793	0.981298	2.3109	1.4184	9.46738	0.526096	4.20233	0.345595	456.382	19.5961	0.00545296	0.0113034	15.4223	0.885733	0.0911891	0.0178472	1.24789	0.264552	2.31341	0.269447	0.0686754	0.0231041	9.74162	0.492063	3.25356	0.222259	38.8011	2.13654	13.3426	0.864196	57.2385	3.48278	11.5125	0.789373	103.912	8.86707	16.1047	0.896809	11350.6	343.249	254.387	11.3487	1349.04	57.878	740.991
M127 Median	15.355	4.06565	3.89291	0.335935	189.597	3.38807	2.55509	1.03679	5.76783	0.293732	2.09782	0.514489	780.164	31.2891	0.00539849	0.00670047	15.9572	0.678149	0.0915754	0.0160042	1.90441	0.261606	3.93887	0.307781	0.256937	0.0548994	16.2457	0.927168	5.58231	0.279557	66.5999	2.22008	24.958	1.40054	119.542	5.2012	27.7688	1.28453	290.544	14.6716	52.0849	2.7733	11472	581.848	397.404	22.384	850.746	38.9656	696.895
T2U Median	14.5281	3.19454	1.89178	3.37072	128.102	34.0243	2.48065	1.18958	9.63736	2.65792	1.12674	0.527423	1186.09	606.248	0.0156665	0.0211224	3.74932	0.759463	0.208407	0.11336	3.59221	1.81279	5.97916	3.43834	1.13338	0.781897	25.2518	17.5514	8.51786	5.51236	105.854	64.9842	39.8881	22.9066	188.804	95.2729	40.6902	18.754	417.663	168.797	70.8005	27.0498	7959.92	599.802	78.4828	46.3496	155.784	75.5561	742.649
T2C Median	14.1168	3.40213	4.09938	5.66613	193.186	36.5097	2.46405	1.12062	7.66775	1.45248	3.96168	28.1043	1036.68	485.366	0.00332533	0.0225007	3.72121	0.538811	0.0437892	0.110948	1.00021	1.60164	2.95364	2.58599	0.847347	0.760132	16.775	12.5306	6.40398	4.36793	85.1728	51.4304	34.1069	17.4858	165.077	77.1543	36.6544	14.8247	386.582	127.969	69.2675	21.7461	8668.27	641.36	117.625	64.7922	283.387	81.1619	721.75
91U Median	15.854	10.2125	11.8147	6.2717	10.8048	1.15674	2.50599	2.4096	4.35055	0.323737	3.69518	1.36656	121.212	17.6113	-0.00452482	0.0102546	2.16812	0.277129	0.00896786	0.0108291	0.120028	0.0478854	0.256737	0.113923	0.176475	0.0405872	1.72157	0.402115	0.700804	0.125624	9.8143	1.40417	4.0237	0.640456	20.5064	3.22636	5.44218	0.832239	61.5527	8.30068	11.2035	1.82178	5387.77	139.713	23.2656	4.00147	69.7376	9.95146	673.474
91C Median	17.4143	4.2023	9.72446	2.98926	9.72779	2.04934	3.46574	1.63977	4.64783	0.424626	3.09728	0.789428	132.362	12.7973	0.00695136	0.00655906	2.23201	0.205887	0.0113025	0.00686177	0.15688	0.0591155	0.377047	0.0552878	0.231631	0.0598613	1.7811	0.542662	0.727752	0.136716	10.8527	1.34046	4.41029	0.517789	22.9353	2.82419	6.03863	0.518973	70.1588	6.46073	12.658	1.23237	5233.3	211.655	22.845	4.00397	70.8826	9.75328	678.862
QNU Median	14.3345	4.75061	0.0791995	9.32571	258.987	72.6722	2.51668	1.31659	15.5817	4.89789	5.11425	5.88248	809.471	188.422	0.00607061	0.0142838	18.3471	4.21784	0.0869614	0.0654786	1.54456	1.04003	3.6056	1.49795	0.407503	0.218613	16.4408	5.85532	5.82141	1.72525	71.1802	19.1739	27.6957	6.42288	123.928	28.2379	26.05	5.42438	256.644	47.2514	42.9057	7.96593	10196.2	951.269	128.478	71.5397	166.18	69.5085	789.561
QNC Median	14.7136	4.25921	0.12247	2.73641	220.333	29.5464	1.64381	1.76266	14.3987	3.71974	4.45871	5.103	1032.54	371.251	0.0227103	0.0545612	18.2447	4.67455	0.232075	0.268896	4.26697	3.47778	7.0118	4.62841	1.19403	0.65296	29.1513	13.8737	9.15568	3.88308	103.041	38.3027	35.5658	12.8923	154.319	50.078	30.5845	9.45616	292.438	85.9451	49.2806	13.7326	9976.66	1265.8	207.049	101.219	229.651	121.162	781.557
OGU Median	16.2714	4.23067	1.88573	3.51882	165.519	37.643	2.54316	6.72244	8.14652	1.88796	38.1484	20.9113	1142.28	435.755	0.031932	0.060358	12.286	2.55598	0.272525	0.155295	4.84194	2.4114	7.58144	3.33785	1.98306	0.906274	26.9664	14.0455	8.41943	4.15942	97.9095	45.019	37.3378	15.6176	169.228	64.304	37.63	13.0683	386.133	120.793	69.2321	20.1541	8260.84	630.926	133.561	48.9932	137.958	50.1509	727.203
OGC Median	15.5245	12.6427	2.22245	1.41591	126.992	50.8466	3.15242	1.73102	6.34324	2.08424	55.495	30.3753	634.956	465.682	0.00726881	0.0218571	10.2412	3.20056	0.0675055	0.139373	1.33349	2.40223	2.58191	3.52496	0.969338	0.948531	11.0876	14.2152	3.70471	4.44138	46.8721	48.9119	19.7758	16.3597	101.783	68.3611	24.8331	13.4912	287.509	129.502	54.6088	20.2287	8758.78	637.59	85.5317	44.4938	149.552	36.5838	705.057
Sample Name	F ppm		Al ppm		P ppm		Ca ppm		Ti ppm		Fe ppm		Y ppm		La ppm		Ce ppm		Pr ppm		Nd ppm		Sm ppm		Eu ppm		Gd ppm		Tb ppm		Dy ppm		Ho ppm		Er ppm		Tm ppm		Yb ppm		Lu		Hf ppm		Th ppm		U ppm		T (Ti)
G8 Mean	46.4028		1.5456		81.29		2.38412		9.48843		4.18208		456.024		0.00786641		15.2435		0.0933016		1.36315		2.27784		0.0684895		9.92161		3.3302		39.2626		13.6798		57.8172		11.5731		106.434		16.5234		11441.1		255.876		1366.65		741.198
M127 Mean	16.252		3.87483		189.542		2.9907		5.80497		2.20059		797.198		0.0059857		16.1068		0.093805		1.90717		3.82458		0.264123		16.1892		5.56863		66.6538		25.5059		117.934		27.2482		289.707		51.9292		11385.5		393.853		849.269		697.442
T2U Mean	15.2288		3.30368		142.837		2.57989		9.92312		1.02097		1147.58		0.0189652		3.50226		0.176611		2.91379		5.43498		1.13357		25.6395		8.62503		104.534		39.4437		179.042		38.3407		382.054		65.6932		8058.5		77.3109		158.11		745.384
T2C Mean	14.4366		6.142		191.488		2.25288		7.48878		20.0627		1226.12		0.0111655		3.58285		0.109977		1.89289		4.23657		1.18023		22.1908		8.33365		106.183		41.4168		197.748		42.291		414.271		72.5809		8798.04		139.51		285.288		719.64
91U Mean	18.9727		14.0504		10.5671		3.19579		4.35706		4.00533		116.299		-0.000309513		2.14515		0.0093624		0.12122		0.279513		0.17876		1.68252		0.692781		9.55092		3.95053		19.9238		5.30455		59.6545		10.8358		5408.82		22.4513		67.9075		673.595
91C Mean	18.3505		9.90536		8.9774		3.38933		4.60862		3.16964		135.512		0.00427053		2.28764		0.0133542		0.167073		0.361478		0.229851		2.01739		0.772423		11.1715		4.42211		23.1984		6.17384		72.0113		12.7743		5252.78		23.1091		70.6326		678.168
QNU Mean	15.4254		3.78428		258.011		2.45703		15.5982		7.45123		809.012		0.00366069		18.9622		0.100681		1.82952		3.7978		0.500246		18.5471		6.26787		74.6997		27.4168		121.4		24.9156		239.027		40.7054		10113.6		149.142		185.076		789.67
QNC Mean	15.2987		1.69184		223.646		2.16252		14.039		7.01388		1087.55		0.0480169		18.6482		0.31605		4.85268		7.99292		1.15728		30.7995		9.61309		107.451		37.3096		158.259		31.2626		295.34		48.8988		9996.35		218.473		243.045		779.017
OGU Mean	15.7986		3.0999		169.081		5.81559		8.43571		39.6478		1127.59		0.0415798		12.454		0.272623		4.41461		6.9572		1.96399		27.8712		8.69591		101.034		37.9713		171.22		37.7752		395.5		69.98		8376.53		134.833		146.387		730.37
OGC Mean	18.7879		2.24397		137.64		3.40857		6.88029		58.8603		698.783		0.0114629		10.6234		0.116073		2.09255		3.40989		1.08536		14.2124		4.65005		56.957		22.1694		110.133		26.0248		291.169		55.3397		8598.97		99.4843		145.73		712.142
Sample Name
G8 Median of lambdas
M127 Median of lambdas
T2U Median of lambdas
T2C Median of lambdas
91U Median of lambdas
91C Median of lambdas
QNU Median of lambdas
QNC Median of lambdas
OGU Median of lambdas
OGC Median of lambdas
[truncated: 5 more columns]

## Sheet: GA6364-MtPainter
Spot Name	F ppm	1s uncert%	Al ppm	1s uncert%	P ppm	1s uncert%	Ca ppm	1s uncert%	Ti ppm	1s uncert%	Fe ppm	1s uncert%	Y ppm	1s uncert%	La ppm	1s uncert%	Ce ppm	1s uncert%	Pr ppm	1s uncert%	Nd ppm	1s uncert%	Sm ppm	1s uncert%	Eu ppm	1s uncert%	Gd ppm	1s uncert%	Tb ppm	1s uncert%	Dy ppm	1s uncert%	Ho ppm	1s uncert%	Er ppm	1s uncert%	Tm ppm	1s uncert%	Yb ppm	1s uncert%	Lu	1s uncert%	Hf ppm	1s uncert%	Th ppm	1s uncert%	U ppm	1s uncert%	T (Ti)
940-1.1	14.305	30.5213	13.1586	40.0372	4.74772	26.1671	1.8184	42.6296	4.74888	6.82973	2.31011	38.2498	123.861	2.26836	-0.0028564	39.9014	1.68417	3.49025	0.0114821	27.0084	0.139945	21.645	0.291759	34.1846	0.162409	12.5951	1.90221	17.9517	0.616117	5.51604	9.01865	9.67558	4.05325	7.11484	19.9567	3.59165	5.40814	3.11072	64.9092	4.16349	12.066	4.24192	4956.63	2.17876	14.4452	7.27755	51.9327	4.41392	680.628
940-10.1	13.426	29.4071	46.1787	43.0341	8.11772	25.8161	2.00982	40.4611	4.50407	7.02697	3.05371	38.353	121.074	2.2587	-0.00385206	31.7975	2.41214	3.20649	0.000615513	95.4621	0.0824453	24.5588	0.417858	14.7962	0.175717	24.4957	1.77462	8.57555	0.663668	4.8721	10.1002	3.9683	4.30063	3.72103	22.0358	5.77534	5.45613	2.56316	63.8564	3.9952	11.3694	3.15512	5564.95	2.1649	24.9391	5.61141	71.3558	7.30153	676.293
940-2.1	10.7645	28.2492	9.18227	34.1909	12.7648	25.7628	1.64716	41.9737	4.99968	2.42025	3.15235	38.1284	140.58	2.86472	-0.00402133	31.9111	2.52144	3.20697	0.00466812	36.919	0.148031	27.6144	0.31608	17.9241	0.217835	19.8773	2.53885	7.64244	0.762468	4.66353	12.4491	3.86505	4.70445	3.63941	24.0121	5.5041	6.63216	2.46364	75.8339	3.95687	13.4071	3.2084	5776.96	2.16517	31.8128	4.69876	88.384	3.43583	684.882
940-3.1	14.8346	29.2552	8.63194	34.2	13.8698	25.763	1.63577	42.4977	4.71982	4.26974	4.8206	38.028	134.159	2.36382	-0.00271685	38.6422	2.29836	5.69041	0.00548729	35.3872	0.0689482	28.1667	0.228572	18.8514	0.224254	10.6715	1.82341	14.3598	0.829162	7.67246	10.8866	4.34945	4.4069	4.19686	23.8903	2.95621	5.8064	2.58751	64.4283	4.0395	11.9252	3.18477	5048.6	2.2733	25.5063	5.83911	82.9052	3.50378	680.123
940-4.1	17.2659	27.2002	11.4358	34.3305	11.7566	25.7697	3.086	39.2799	4.37485	6.50866	8.4956	37.9852	119.999	2.4803	0.0179471	25.5215	2.19492	3.24532	0.0131228	23.3604	0.079957	25.1817	0.260385	38.1425	0.192283	10.9071	1.78537	8.48396	0.680403	4.82742	10.0708	6.92443	4.28582	7.63165	21.8792	2.95026	5.03897	2.95428	64.6424	4.00113	11.0467	3.16935	5512.58	2.26436	26.3371	4.92058	75.6508	3.5054	673.925
940-5.1	13.4484	29.4563	10.6382	34.3264	11.4712	25.7711	3.06541	38.9394	5.55627	5.83098	3.9389	38.0402	135.992	2.25547	-0.00191903	43.2917	2.40484	4.37507	0.0140554	22.8091	0.109822	21.9318	0.407305	14.4893	0.272822	10.6753	2.34127	7.6644	0.903855	4.36224	10.6866	4.2539	4.70494	3.62764	22.3365	3.23258	5.97221	2.81604	68.6026	3.97753	12.3391	3.12839	5256.02	2.16782	29.0775	4.84774	84.9839	3.44025	693.725
940-6.1	13.5793	30.1537	13.1752	34.1907	13.3536	25.7518	1.91595	40.6704	4.60992	4.94661	3.785	38.042	135.328	2.96245	-0.0128068	21.1393	2.33119	3.38623	-0.00030478	134.585	0.109358	21.5678	0.371734	15.9753	0.277893	9.74198	2.01559	8.04181	0.799995	11.4627	11.5845	3.87427	4.97646	3.55486	23.3082	2.88562	6.33091	2.59537	71.7181	3.95358	12.4022	3.11019	5566.02	2.16463	28.6468	4.74824	89.8097	3.58062	678.191
940-7.1	20.1708	27.9912	17.276	34.188	5.89703	25.8746	1.40747	42.6997	4.0255	6.73601	1.32933	38.3595	84.2588	2.30347	-0.000549496	76.3709	1.62804	3.37224	-0.00239702	49.2007	0.0775945	25.2256	0.150997	22.122	0.12208	12.8924	1.04399	10.2154	0.495014	5.58501	7.01356	4.30889	2.9716	6.25638	15.9711	4.92311	3.89657	2.85542	44.5668	4.26453	8.76913	3.49367	5512.36	2.18173	13.9279	6.05333	46.1815	5.39285	667.221
940-8.1	23.8477	27.5623	12.1678	35.3582	11.4475	25.7708	2.88106	40.1077	4.29135	2.59829	4.9031	38.018	125.926	2.2785	-0.0105707	22.5502	2.16857	3.26801	-0.00278386	46.4593	0.0700329	26.7867	0.217896	19.6768	0.124849	13.3266	1.92745	14.5415	0.766486	7.89353	10.2603	4.09631	4.32322	3.71961	22.7316	2.94076	5.40126	2.89795	65.702	3.99456	10.8143	6.25733	5549.38	2.47901	27.8518	5.48311	69.2211	3.57239	672.365
940-9.1	23.6183	27.1065	21.998	40.1225	11.6525	26.1712	1.45784	42.3888	5.08654	2.35199	3.47716	38.0987	135.069	2.25422	0.000987825	57.5409	2.35155	3.22022	0.00451103	36.4586	0.122801	20.5109	0.27043	18.4255	0.240246	9.94116	1.51851	10.1066	0.768044	4.73143	11.9716	3.94185	4.18091	6.64889	23.6704	2.88132	6.00177	2.4796	68.1517	3.97031	11.6279	3.13718	5383.95	2.18285	27.4637	10.9932	72.0373	3.52167	686.314
964-1.1	37.8518	25.2866	38.8306	59.9145	13.3368	25.7572	3.37695	39.0326	4.17467	2.61696	6.69963	37.9975	124.42	2.55205	0.0672967	17.0091	2.29954	3.23373	0.00838695	28.1928	0.078979	25.4041	0.271983	19.0446	0.207533	21.9624	1.84179	8.44198	0.728383	4.78988	10.821	4.25886	4.19714	3.74768	21.5957	5.85191	5.06669	2.81104	65.4185	4.14911	9.47046	20.0644	5301.33	2.16804	24.5627	5.07017	68.1741	3.58778	670.141
964-10.1	18.666	39.0675	9.74339	34.1894	13.5167	25.7516	2.32759	39.6278	5.0209	6.1874	4.92095	38.0166	134.655	2.27132	0.00641249	26.0997	2.34765	3.36119	0.0162476	21.1563	0.184968	22.6307	0.339722	15.4413	0.270384	9.51355	1.67608	16.9221	0.831585	9.48549	11.9376	3.84567	4.8784	6.05279	25.9615	2.91399	6.15927	2.44747	76.1979	3.93925	12.9341	4.87191	5628.59	2.1637	31.0452	5.06819	78.202	3.46244	685.233
964-11.1	13.0757	31.2493	7.66296	35.744	12.9802	25.7662	3.08649	38.9617	5.04897	2.52912	6.98046	38.1278	139.517	2.25762	-0.00530311	29.3203	2.57418	3.21914	0.00667092	32.2622	0.109783	22.7051	0.333628	29.2037	0.212567	11.0588	2.43772	7.83265	0.799257	4.63426	12.106	3.92618	4.7077	3.7186	25.6266	2.88784	6.66348	2.48741	71.8988	3.99247	12.9368	3.31095	5046.06	2.17222	33.204	9.82859	91.4914	3.64916	685.697
964-12.1	19.1613	27.8866	12.1079	36.6227	13.435	25.7632	2.30855	40.2881	5.23413	2.42741	6.08241	38.3721	142.609	2.2567	-0.00152969	49.5733	2.5361	4.57209	0.0109503	25.9907	0.116961	22.032	0.27552	15.7517	0.250218	10.1621	2.45569	8.67186	0.962518	4.40349	11.8042	5.67687	4.92359	3.66727	24.1845	2.93947	6.41337	3.84167	74.9903	3.9749	12.6445	3.15245	5160.8	2.19166	34.483	4.65203	88.4544	4.93285	688.701
964-13.1	16.5202	28.2187	6.76992	34.1962	9.70111	25.7999	3.79238	48.7403	8.91659	3.95346	7.97557	37.9921	155.144	2.25368	0.00357031	34.1314	2.42783	3.23707	0.012915	24.2219	0.148387	19.8178	0.518098	11.7497	0.255584	10.1363	2.53226	7.71456	0.978606	4.34999	12.8596	4.16229	5.36842	3.9413	26.9204	2.85435	6.67936	2.46992	74.2422	4.11177	12.8507	4.23765	5288.98	2.17081	26.4461	15.5415	69.7814	3.61827	735.445
964-14.1	13.1965	30.4248	20.746	34.1875	7.26927	25.8516	2.03334	41.112	4.1433	2.71379	4.9713	38.0257	112.536	2.26732	-0.00409732	32.629	1.99758	3.33511	0.0043996	39.263	0.11612	22.2994	0.210886	19.8059	0.165814	11.8735	1.54484	9.4011	0.669275	5.89382	9.22796	4.16307	3.82178	4.15826	19.9274	3.25932	4.94192	2.72643	61.664	4.04835	9.79229	3.50392	5300.08	2.17137	16.3612	5.97288	52.0983	3.87963	669.534
964-2.1	15.898	27.6549	15.3314	40.5759	8.9593	25.8593	1.93192	40.5517	4.78743	2.849	7.73966	38.4244	169.636	2.24689	0.00497508	28.559	2.68106	3.16611	0.0141374	22.2709	0.196791	53.3311	0.522563	11.5164	0.358819	8.91434	2.72125	7.30475	1.04636	4.04913	14.6221	3.71903	5.86518	4.94256	29.1194	2.82589	7.57099	2.31715	86.3741	3.90305	15.2305	3.17518	5535.42	2.16433	27.5391	4.7908	69.9624	5.88441	681.294
964-3.1	15.1301	27.6341	13.1255	36.7385	13.5384	25.7519	2.93089	39.666	4.02232	6.14075	5.97143	38.2123	123.174	2.27761	0.0061083	26.8118	2.14557	4.20852	0.00987568	26.0586	0.223486	19.8003	0.394342	23.0844	0.254076	9.95877	1.86939	8.32609	0.84288	7.28759	10.2181	5.34976	4.45211	3.82753	21.7829	2.94445	5.79098	2.81321	67.2722	3.98312	12.3159	3.12363	5345.72	2.18399	28.5997	5.22402	77.7573	3.4791	667.158
964-4.1	16.282	27.7154	8.12746	34.1916	10.3536	25.7788	1.69573	41.3232	5.12045	4.25695	6.79972	38.129	126.516	2.35481	-0.00296554	35.0747	2.47817	3.18713	0.00241237	48.6109	0.129554	19.954	0.257633	41.9433	0.190662	11.144	1.79307	8.52851	0.839442	8.25031	11.3439	4.16787	4.36675	3.6635	22.8036	2.89653	5.51343	2.52324	64.7747	4.05401	12.0894	3.28512	5191.46	2.68986	26.0452	4.86509	80.6638	3.44382	686.867
964-5.1	16.735	26.9702	12.6627	34.2516	10.2347	25.7776	0.794853	47.781	4.14018	2.53736	3.16189	38.1141	36.5674	2.3428	0.00431389	30.1767	1.52134	3.40198	0.00778056	28.4726	0.0423737	33.1169	0.0037643	95.5187	0.0384314	24.0972	0.245481	21.3665	0.218496	8.04544	2.73762	5.62996	1.14665	10.1194	6.40802	4.30738	1.6603	4.22651	22.2883	4.56223	3.86303	7.0004	5605.06	2.34969	12.9325	6.2291	48.6179	8.04305	669.474
964-6.1	19.4181	26.7843	12.3011	34.1872	13.6766	25.7505	1.77624	41.0829	5.07746	2.76963	6.57843	37.9955	142.424	2.41725	0.00990135	34.2735	2.5752	4.0662	0.0339384	21.9669	0.0946951	22.9391	0.322657	14.4693	0.20194	10.2044	2.23135	7.79451	0.890744	4.25493	12.3114	3.82694	5.39536	3.48578	24.943	2.82879	6.54547	2.41544	77.037	5.3448	13.3198	3.07865	5427.32	2.16522	31.9126	4.5937	86.2337	3.64211	686.165
964-7.1	15.8612	28.2609	11.9305	34.226	11.907	25.8296	1.18281	44.8829	3.82119	3.31903	6.97679	37.9987	30.0222	2.46341	0.00912728	24.0709	1.50036	3.48552	0.00668226	31.9704	0.0319964	39.9641	0.0134038	53.7593	0.0251647	21.5977	0.358214	17.9409	0.147036	10.1228	2.36311	18.0104	0.79009	12.2703	5.06517	4.99617	1.38694	4.40724	17.3231	5.38172	2.95088	4.32505	5209.06	2.1706	12.0765	7.79723	45.1356	3.98692	663.074
964-8.1	15.8203	28.8684	89.5807	36.3445	12.9428	25.7654	2.63246	39.5633	4.42836	3.11578	11.2912	38.3461	118.023	2.26328	-0.00613596	27.5618	2.091	3.30441	0.0119916	24.8723	0.130907	20.8322	0.255897	57.8727	0.17839	11.4901	1.85293	8.61708	0.751153	13.8158	9.97815	5.68711	3.39893	6.15287	20.4223	5.10091	4.88154	6.67179	61.1224	6.96581	10.979	3.41141	4886.34	2.173	23.7537	8.67294	69.0569	3.60694	674.913
964-9.1	10.7633	30.9504	17.5138	43.0199	7.20966	25.9255	2.52843	39.4768	4.05226	5.1742	5.03924	38.0185	111.583	2.26296	-0.00368986	32.755	1.95002	3.50306	0.0108576	25.285	0.119212	21.1448	0.202183	19.0753	0.182287	25.7278	1.25086	9.92827	0.619914	5.01679	8.76005	4.12475	3.78148	3.84937	19.6925	3.04794	4.95156	4.66174	58.4964	4.03937	11.2322	3.16654	5406.81	2.18412	20.8938	5.29805	66.2369	3.60405	667.752
GZ7-3.1	19.4071	28.3902	19.9537	34.1856	178.721	25.7083	1.41747	45.016	24.8646	1.43947	2.55603	38.1338	525.454	2.59922	0.0241326	22.8489	63.912	3.2054	0.139002	13.3245	2.56086	9.23053	3.62351	6.91261	0.444591	9.01211	12.5305	5.60768	4.07758	2.90288	47.5704	3.47497	15.3135	3.18932	73.5514	2.58314	15.8178	4.94004	159.125	3.90738	26.4024	4.39236	8694.1	4.86397	489.734	4.72355	523.752	3.02537	839.548
GZ7-3.1…dup1	12.1131	32.9117	20.8709	34.1864	176.448	25.6721	1.18039	44.2445	25.861	1.48255	2.38956	38.1068	573.091	2.22833	0.0265658	36.3911	72.3333	2.82433	0.212245	12.0452	2.92721	8.80613	4.06754	6.56113	0.518051	8.29411	14.4409	5.38543	4.71109	2.68306	55.4101	3.29026	19.2165	2.82843	85.0094	2.33395	18.1186	1.95694	188.232	3.76626	30.9572	3.93793	10567.1	2.24613	625.652	3.14603	702.865	2.90592	843.966
GZ7-4.1	10.6392	31.9761	21.0739	34.1834	176.523	25.6718	2.5706	39.2055	25.7892	1.46971	3.01422	38.0632	572.131	2.22803	0.0161668	27.9904	71.3236	2.82407	0.184704	12.3093	2.60992	11.9264	4.55255	6.7572	0.553975	8.20334	16.1065	5.36711	4.65738	2.67807	53.9477	3.28956	18.7628	2.82883	84.7358	2.32866	18.155	1.94784	177.461	3.77135	29.9642	5.6844	10344.1	2.14929	613.393	3.14472	698.822	3.15921	843.653
GZ7-5.1	23.1295	26.0425	20.21	34.1867	181.947	25.6683	2.36757	39.744	24.9588	1.33545	2.75258	38.0778	573.388	2.27279	0.0278259	21.4284	71.6896	2.83174	0.171643	12.4539	2.51445	8.96836	4.26842	11.8367	0.551292	8.34216	15.5408	5.354	4.92123	3.74158	53.7974	3.29693	18.0691	2.84782	81.274	2.34723	18.2262	1.95954	175.5	4.0408	30.677	2.95358	10084.2	2.15064	608.776	3.15017	674.773	3.44691	839.972
GZ7-5.2	13.7077	28.2495	20.3457	34.1862	183.367	25.7084	2.14124	39.98	24.842	3.05055	2.43578	38.096	575.028	2.22755	0.0190569	24.4617	70.9052	2.83065	0.211819	18.4738	2.76676	8.79445	4.32177	6.51284	0.539078	8.21146	16.8268	5.46846	4.81625	2.65769	56.1612	3.28142	18.7529	2.82696	83.6214	2.9391	18.5144	2.06074	179.376	3.82187	30.3157	2.86955	10202.1	2.14887	627.935	3.14072	701.152	2.90317	839.447
GZ7-5.3	16.1431	29.0522	20.4433	34.3222	177.334	25.6744	0.406172	62.4716	24.326	3.744	2.55055	38.1343	552.545	2.32135	0.0293639	25.1672	68.0309	2.89211	0.197662	12.6534	2.3332	9.42142	4.2181	6.72921	0.4863	8.84393	15.2354	5.45785	4.33861	5.01734	50.2505	3.34941	17.7879	2.92439	79.6981	2.40775	17.0964	2.04484	172.419	3.80832	28.5943	2.92785	9490	2.15643	574.761	3.69275	652.108	2.93163	837.102
GZ7-5.4	15.281	28.7203	18.9485	34.185	183.836	25.6691	0.827595	49.2222	24.9934	2.90797	2.6563	38.1065	571.835	2.22974	0.0360552	19.729	71.1268	2.82657	0.164024	20.7951	2.67637	9.04868	4.26089	8.97763	0.509497	8.61413	15.9455	5.60097	4.6006	2.75245	54.902	3.98999	19.2738	2.86839	81.8601	2.37683	18.098	2.64763	176.187	4.93814	29.5874	5.04651	10117.1	2.25291	620.07	3.72191	684.715	2.91976	840.127
GZ7-5.5	12.854	31.713	18.6661	34.1888	187.216	25.7207	1.56501	43.1538	25.778	1.37666	2.80348	38.0993	561.044	2.27565	0.0222559	40.9944	69.6197	2.96903	0.198552	12.3666	2.8559	9.47266	4.07766	9.36582	0.49389	8.60822	14.2299	5.72397	4.76653	2.75185	53.0098	3.80758	17.5728	2.91273	80.6858	3.44335	17.8204	2.16146	178.416	3.79442	29.5537	2.9137	9859.92	2.23416	581.514	3.16952	649.773	2.92619	843.603
GZ8-2.1	42.3051	25.1606	1.83989	34.6679	83.1916	25.6862	0.859505	54.0753	8.76138	2.32709	4.52292	39.3105	391.066	2.39727	0.0173764	28.9179	12.0861	2.947	0.0712955	16.6326	1.28623	11.2886	1.74563	8.50713	0.093405	19.8299	7.76449	6.47177	2.65023	3.49691	32.9297	3.75621	10.5617	3.36746	46.9761	2.77754	9.31994	2.5463	83.8287	4.08432	12.9472	3.62634	9199.27	2.18498	203.58	3.5252	1055.64	2.95949	733.832
GZ8-3.1	53.0203	26.582	1.72011	34.274	82.3908	25.6836	4.60855	45.4123	9.33172	1.82383	5.749	38.0359	465.054	2.31635	0.00782575	24.5055	15.5156	2.87374	0.101691	13.5518	1.15661	10.3076	2.1524	7.21095	0.0537148	19.3595	10.2485	5.56049	3.51909	2.83064	41.6323	3.33893	13.9469	2.92809	58.096	2.43511	11.9178	2.10319	108.964	4.38448	16.4908	3.01638	11699.6	2.1473	256.663	3.27799	1366.99	2.88654	739.65
GZ8-3.2	49.9417	24.0711	1.87047	34.2596	84.6083	25.6746	2.39504	39.1783	9.34033	1.77544	5.53456	38.002	455.366	2.26878	0.0164302	31.2708	15.3279	2.89645	0.107846	18.6327	1.26405	10.0081	2.39775	11.1428	0.0387931	28.1426	9.80434	5.55296	3.53076	3.02974	39.8832	3.3373	14.0885	2.8953	58.5799	2.41087	11.8378	2.07423	106.507	3.84215	16.0717	3.00033	11559.6	2.15473	249.955	3.26945	1343.51	2.88353	739.736
GZ8-3.3	32.9442	32.1002	1.88601	34.4048	82.9376	25.7333	2.34325	40.3203	9.31726	1.9212	5.91784	38.0125	451.207	2.23221	0.0053215	148.178	14.8556	2.88597	0.0772607	15.2728	1.3047	10.3325	2.69347	7.11662	0.0474137	23.7005	9.67194	7.41301	3.26254	7.28877	38.062	4.29436	13.1072	3.00692	55.4972	2.50253	11.4901	2.17773	102.009	4.4782	16.6267	3.20684	11252.2	2.23407	245.63	3.32186	1290.38	2.87554	739.506
GZ8-3.4	46.8137	24.0539	1.58869	34.2994	84.0791	25.7367	1.06176	46.4593	8.99685	1.96758	5.13128	38.0275	450.722	2.24025	1.82827e-11	999.104	14.7223	3.23234	0.0923845	14.6439	1.72347	9.88807	1.95842	7.64039	0.0579495	21.7666	9.7745	5.71713	3.20869	2.99519	40.5688	3.38629	13.5509	3.00427	56.4119	2.65878	11.2215	2.20611	103.067	3.89898	16.621	3.06405	11007.8	2.15178	248.976	3.32643	1286.88	2.87655	736.271
GZ8-4.1	58.3147	27.1625	1.74537	34.2706	81.3241	25.8534	3.64809	38.3411	9.33883	1.83416	5.38238	38.0084	461.986	2.23011	0.0180949	25.0989	15.413	2.87377	0.0809937	15.9688	1.57851	9.61392	2.22693	7.16099	0.061623	32.6386	10.9867	5.60989	3.54831	2.81591	40.6658	3.3489	13.9026	3.07933	59.2541	4.58951	11.6635	2.11255	109.33	3.84972	16.6453	3.08795	11382.5	2.15679	259.222	3.27598	1374.95	2.88683	739.721
GZ8-5.1	45.306	24.0066	1.96608	34.2362	79.2393	25.6857	5.33461	37.1718	9.04334	1.88014	5.56085	38.2419	451.447	2.28737	0.00284947	36.5035	15.3388	2.90788	0.10938	21.8703	1.10107	11.6966	2.1298	7.3316	0.140599	12.6615	10.2645	5.60642	3.42359	2.87473	39.5252	3.3637	13.8661	2.94905	60.1495	2.58153	11.68	2.12551	100.137	3.87815	16.3831	3.87285	11011.5	2.3208	244.36	3.90046	1310.75	2.87044	736.746
M1L-2.1	14.6579	28.7956	4.61647	34.2017	190.881	25.695	0.538231	53.0368	5.87811	2.18588	2.68015	38.0825	832.208	2.22547	0.00506991	69.8736	16.2163	2.89713	0.105876	13.4004	1.59377	10.3707	3.51295	9.98109	0.277744	9.48759	17.562	5.279	5.83536	2.57434	70.9822	3.24861	27.0139	2.7387	128.098	2.24875	29.0137	1.83753	310.233	3.71663	55.8457	3.07301	12471.7	2.15481	408.862	3.24414	908.679	2.88708	698.51
M1L-3.1	7.25284	30.3145	4.54496	34.3043	194.75	25.7102	2.10454	40.1065	5.3534	2.71856	2.31043	38.0984	819.304	2.22985	-0.0119157	21.4883	16.2094	2.87034	0.10294	13.7898	1.82733	10.0248	3.91335	6.57022	0.282712	9.59986	17.2165	5.28303	5.66107	2.5805	70.1141	3.6902	25.9634	2.83261	117.962	2.62775	28.5048	1.88213	294.8	3.71917	52.7594	2.79733	11869.3	2.21091	402.216	3.24544	883.497	2.91739	690.59
M1L-4.1	15.2457	28.754	4.32133	34.902	193.767	25.6686	0.958767	47.3208	6.33944	2.24981	2.76343	38.0959	794.488	2.22707	0.0141807	94.7054	15.6827	2.88235	0.0868198	14.7284	1.78758	13.7146	3.29314	7.27179	0.28492	15.5281	17.0608	5.34837	5.5019	2.65966	66.4373	3.27762	26.1861	2.77836	119.669	2.28482	27.3255	1.87813	282.555	4.82269	52.3385	2.86633	11508.9	2.15049	388.365	3.28128	841.176	2.90114	705.005
M1L-5.1	10.7425	28.7582	4.19691	34.2081	196.689	25.6721	1.36004	44.0538	5.77197	2.35059	1.74289	40.0393	781.81	2.23243	-0.00544286	29.3203	15.4401	3.34929	0.0840031	14.9096	1.84563	9.61342	3.33277	6.88213	0.284326	10.0575	16.1574	8.90738	5.28294	2.68759	65.5365	3.28277	24.6469	2.79712	114.62	2.2965	26.6492	1.94018	283.434	3.77943	49.0428	3.42722	11064.5	2.15152	380.017	3.2285	808.287	2.90553	696.956
M1R-1.1	15.4418	43.4337	4.85424	34.249	194.187	25.7124	1.28002	43.464	6.06034	5.67107	3.55187	38.0501	804.787	2.22587	0.00524916	28.2774	16.1613	2.87209	0.113299	13.3509	2.10934	9.22798	3.73102	6.65569	0.266196	9.66481	17.9084	5.27713	5.4087	2.60972	69.5073	3.25209	25.4798	2.75496	121.557	2.26024	28.1712	1.84626	296.738	3.72079	53.8061	2.79845	11695.4	2.14764	410.239	3.19544	845.235	2.91684	701.124
M1R-1.2	15.035	28.2181	4.65302	34.2921	193.143	25.6683	2.25092	44.5214	6.43653	4.43903	3.4847	38.0605	789.338	2.22651	0.0054432	28.6313	15.875	2.88036	0.136647	13.1125	1.7933	9.55033	3.87128	6.65527	0.247303	16.2328	16.9032	6.51976	5.69972	2.62504	68.3553	3.26672	25.596	2.76964	118.001	2.27716	27.4986	1.91444	283.533	3.76833	52.0999	3.06619	11426.9	2.14935	397.265	3.79904	827.636	3.48044	706.322
M1R-1.3	19.462	27.6103	5.17778	34.2147	198.872	25.725	12.033	60.869	6.28043	2.28701	3.28189	38.0701	814.929	2.26815	-0.00487866	30.455	16.417	2.87907	0.0851603	14.8188	2.50116	9.64057	3.99854	6.68059	0.255613	10.2268	16.2931	5.3756	5.68851	4.49677	70.9177	3.33082	26.5064	2.77286	123.868	2.27687	27.8402	1.87458	290.611	3.7732	53.7359	2.86298	11883.7	2.19839	419.839	3.2857	858.852	2.90004	704.197
M1R-1.4	23.4052	26.1652	5.17514	34.2672	196.581	25.6686	14.4195	56.5172	5.97156	2.3226	3.37255	38.6228	802.894	2.22713	0.00885473	24.6477	16.046	2.88102	0.0930908	14.2586	2.08747	9.38151	3.98642	6.73818	0.257413	10.0487	15.3152	8.0812	5.69018	2.65058	68.4526	3.71696	26.2804	2.88372	121.23	2.3685	27.6165	1.88088	288.056	3.7348	53.0974	3.12803	11442.2	2.43937	413.704	3.2163	840.428	3.80589	699.859
MPC-24.1	14.6242	29.9851	42.4883	34.1815	1388.5	25.6788	2.34781	40.7016	5.97851	2.40356	5.06239	38.0311	2687.81	2.22264	0.0018887	46.9841	1.46573	3.56377	0.0248616	27.8141	0.74277	12.6034	3.81546	6.81147	0.175803	11.7256	33.1489	5.24464	14.9566	2.94992	230.614	3.16643	94.3236	2.63661	440.52	2.14462	98.0284	1.7108	959.633	3.68033	163.219	2.89228	10566.4	2.16517	54.3909	6.2469	377.547	3.00156	699.958
MPC-25.1	9.94359	37.3795	27.8615	34.4575	1039.94	25.705	2.38737	40.3707	4.49941	2.65554	3.98962	38.0524	2015.42	2.22317	0.00357525	34.9105	1.59945	3.72604	0.023923	25.6626	0.618223	13.54	2.82072	7.08009	0.126266	15.1948	23.3582	5.22722	11.1195	2.41725	165.51	3.21235	69.3574	2.62592	330.727	2.19552	75.9891	1.95663	760.776	3.67882	131.498	2.9675	11017.2	2.15191	61.5551	4.06724	428.029	3.32208	676.209
MPC-28.1	17.4849	27.8062	28.036	34.185	1137.69	25.6635	1.74938	42.0115	3.29329	8.99713	3.18671	38.0737	2253.15	2.22269	0.00460458	31.0453	1.76412	3.4	0.0513097	26.8906	0.753989	12.0313	2.96883	6.96048	0.301492	10.5702	27.9281	5.15374	12.9221	2.37589	190.745	3.17161	76.4561	2.61402	350.413	2.1542	76.3356	1.72416	757.286	4.29717	125.726	3.88722	11660.4	2.14989	63.6399	4.01511	507.465	3.00393	651.433
MPC-29.1	16.5001	29.1506	28.7293	34.1851	1049.7	25.6637	2.83912	39.4714	6.18539	4.08726	6.50141	38.0073	2076.9	2.2261	-0.00449646	31.6855	2.01792	3.35206	0.031052	23.0749	0.922507	11.4935	3.13937	6.99697	0.22073	10.6226	24.1093	5.21124	11.5165	2.41057	173.595	3.88565	73.0706	2.62033	350.893	2.52581	77.5856	1.91307	768.553	3.67831	130.925	2.94667	10793.2	2.15195	65.7985	4.02444	362.764	3.00035	702.881
MPC-30.1	21.8747	25.9641	39.6089	34.1899	1190.91	25.7412	5.5155	37.2412	4.79709	4.92198	7.63096	38.0227	2347.23	2.22255	0.0151542	46.2328	1.59013	3.44651	0.0608025	25.9601	0.782856	13.138	3.83869	6.77453	0.283534	9.81437	27.5364	5.15627	13.3232	2.36532	197.152	3.16962	82.038	2.60687	397.443	2.15707	87.1797	1.71302	888.367	3.74501	152.487	2.73723	10770	2.15144	58.2086	4.10026	371.432	2.98982	681.46
MPC-31.1	10.4127	38.234	38.1637	34.1815	914.355	26.0006	2.85165	42.5362	6.04076	5.14193	6.34153	38.1645	1833.57	2.22629	-0.00603221	27.686	1.08836	3.71763	0.00569943	34.2321	0.342833	17.684	2.09276	8.01559	0.121624	13.75	20.6748	5.43059	10.2281	2.42203	153.749	3.21195	62.6601	2.62968	304.26	2.16327	68.7197	1.75595	711.639	3.76057	120.364	2.76155	11308.1	2.19922	51.0678	4.48983	395.55	2.97942	700.846
MPC-32.1	17.4074	28.3666	51.3498	34.1934	863.453	25.6702	2.9382	39.4445	4.65243	2.63524	3.23715	38.0811	1675.38	2.40475	-0.0130995	22.1079	1.78376	3.4265	0.0145788	23.7756	0.643436	13.1985	2.53481	7.30449	0.157879	12.4298	22.0976	5.26237	10.0602	2.45062	147.989	3.19296	58.0991	2.64753	267.288	2.22391	58.2021	2.1279	590.929	3.71142	101.125	2.79155	11088.6	2.15216	53.027	4.22617	336.703	3.01897	678.943
MPC-33.1	18.4208	26.92	34.2859	34.1837	1277.54	25.673	3.62684	39.0268	5.98179	2.6848	5.10673	38.0202	2642.13	2.22216	0.00767855	25.427	1.5156	5.16902	0.036088	20.7911	1.01123	15.891	4.17453	6.60422	0.316237	10.2995	30.9004	5.12205	14.8242	2.34141	220.13	3.16303	92.5612	2.76639	452.762	2.13726	100.424	2.39565	1002.48	3.76331	169.369	2.88525	10914	2.27688	64.3462	5.89278	360.848	3.0683	700.005
MPC-35.1	19.0052	26.6819	39.3114	34.3409	920.537	25.7889	2.19087	45.2078	4.77658	6.69114	3.7522	38.0542	1895.17	2.24534	0.00632339	27.6236	2.80759	3.19223	0.0275609	22.6911	1.04272	10.8481	3.56893	10.4515	0.358874	9.16555	28.0296	5.28497	12.1724	2.3897	168.472	3.18059	65.7084	2.62943	287.541	2.61565	61.9389	1.79622	597.959	3.68732	99.1163	2.75997	11493.8	2.31143	76.8833	3.8584	454.244	3.64587	681.107
MPC-55.1	18.3582	27.6424	18.5827	34.185	1014.38	25.6637	2.46532	40.038	5.42421	2.85475	3.03285	38.1518	2152.41	2.27799	0.00311206	36.5035	4.13199	3.17724	0.0666263	17.1629	0.953609	20.1717	4.25907	6.62632	0.488988	13.4894	29.7316	5.69201	13.3717	2.36779	186.219	3.17388	75.5556	2.89302	355.98	2.15319	78.0924	1.72311	782.817	3.69235	127.457	4.16837	10717.8	2.16235	123.672	3.73593	401.2	2.98165	691.695
MPC-82.1	12.0546	30.5694	23.3429	38.0256	1100.09	25.6628	5.70517	44.9659	6.05763	2.32145	5.17647	38.3243	2224.31	2.22287	0.00347416	35.2419	2.43184	3.26333	0.0239335	27.5241	0.834975	11.9986	3.52824	12.6343	0.236516	10.5632	26.0612	5.18925	12.4165	2.48857	187.998	3.17458	77.9704	2.61433	378.221	2.44191	82.8981	1.99791	842.512	3.67522	145.107	2.74088	11190.7	2.20968	69.2096	3.95051	400.405	2.98459	701.086
MPC-85.1	15.6132	28.9557	36.4919	34.2104	1351.14	25.6709	2.54493	39.9603	4.8904	2.54819	3.24926	38.0752	2634.38	2.22243	-0.00454679	31.4661	1.12837	6.80603	0.0118164	25.5331	0.75994	12.4755	3.40353	6.9036	0.178858	11.5573	27.634	6.35085	13.428	2.46154	210.309	3.19138	91.4565	2.60149	437.249	2.14189	99.6652	1.88924	1007.53	3.78569	169.423	2.75264	11207.1	2.15815	57.2929	4.1073	424.049	2.97557	683.05
MPC-87.1	13.882	29.9036	24.6227	34.256	1304.37	25.6626	2.72504	39.6049	5.21646	2.49084	3.13363	38.0805	2657.72	2.22238	0.00408915	32.755	1.79776	3.39701	0.0142139	23.6339	1.05514	12.096	3.79796	6.73745	0.256034	15.5406	30.9057	5.12974	14.886	2.90203	224.758	3.18641	93.0316	3.24238	453.556	2.48519	100.625	1.7041	1021.1	3.73392	174.595	2.73343	11039.9	2.15143	75.2829	7.3487	454.134	3.02693	688.418
MPC-91.1	10.6503	29.2345	25.4545	34.2894	420.384	25.7759	1.91769	41.9779	6.08044	6.24282	2.52891	38.214	705.114	2.22871	-0.00806107	26.0521	4.24739	3.0906	0.00438076	40.8012	0.344947	19.0106	1.52578	8.35498	0.443208	9.73611	11.319	5.7423	4.64045	4.08637	61.4291	3.30796	25.1285	2.80937	117.458	2.3943	25.877	1.91347	272.679	3.74733	48.779	3.33116	9907.78	2.15552	67.3536	5.7904	159.227	3.22966	701.409
MPU-03.1	10.379	53.3974	25.6069	34.1831	1206.29	25.6814	4.32108	38.1482	5.2628	2.42898	4.10193	38.7929	2443.06	2.22249	0.00324036	35.7622	2.23186	6.10049	0.0373457	20.1622	0.802444	13.2304	3.79541	6.71094	0.23748	10.5733	28.9314	5.14704	13.3859	2.36577	203.931	3.16827	85.6213	2.60456	412.14	2.14405	93.3487	1.70847	941.466	3.68377	155.275	3.82089	11328.9	2.15046	87.4858	3.76147	435.871	3.03078	689.159
MPU-06.1	10.0323	28.9757	32.5453	37.7112	1672.22	25.6737	6.15871	36.9735	3.40371	2.97132	6.18293	47.8015	3230.06	2.24118	0.0856644	16.2457	1.66702	5.51876	0.0679503	15.7018	0.97415	11.2281	3.69254	6.72719	0.299705	9.57867	29.1139	7.44562	16.0949	2.32668	243.044	3.17874	113.591	2.7184	560.64	2.12759	130.977	1.68618	1334.68	3.66763	232.59	3.099	11787.4	2.14939	75.1087	3.87859	610.159	2.92629	653.99
MPU-10.1	17.5372	28.6255	30.6524	34.1935	1171.1	25.7042	1.33994	44.2445	5.3667	5.50404	6.08241	38.1906	2356.04	2.22275	0.00421256	32.5048	1.86838	4.41243	0.010526	26.8538	0.837102	28.1673	3.65981	10.4317	0.270785	9.92653	28.0423	5.16732	13.1743	2.37597	197.005	3.17238	82.3243	2.61041	389.807	2.14934	88.1464	1.71604	896.907	3.68757	145.091	7.93878	10679.6	2.15233	73.0136	3.9346	383.741	3.86069	690.799
MPU-12.1	11.071	28.5648	35.7187	34.3782	1072.66	25.6902	6.8181	37.9381	5.31921	2.43757	12.3477	37.9742	2172.66	2.22588	0.0582604	17.4592	19.1643	8.97035	0.428549	19.9551	6.02066	18.6126	7.44655	9.0587	1.75229	11.8548	32.6152	6.01657	12.6991	2.47433	188.27	3.19793	74.6498	2.61611	366.095	2.15161	82.7866	1.7381	862.067	3.82238	153.77	2.96948	10449.2	2.21102	168.304	9.41277	472.425	3.01889	690.052
MPU-15.1	27.6961	42.2947	65.1738	34.1802	1112.4	25.6635	16.3959	35.5337	4.61009	2.59815	13.1818	37.9714	2216.4	2.35719	0.807941	14.6474	4.83065	3.03774	1.25335	10.8982	9.87096	8.04481	6.11924	7.5822	0.524516	8.51768	24.0182	5.35688	11.507	2.4049	181.777	3.61744	74.7471	2.63272	382.607	2.17816	89.1424	2.51165	915.913	3.68549	159.854	2.73619	12121.6	2.23039	55.4768	4.12587	447.88	2.96611	678.194
MPU-15.2	198.819	41.9535	131.621	37.898	761.073	25.6826	57.154	35.0285	8.66629	13.2546	18.9368	38.3995	1380.67	2.34886	3.27559	21.0096	14.6277	13.8111	4.28291	18.097	28.6895	13.9716	11.9646	13.9179	1.16644	14.822	21.0762	5.32174	8.33446	4.61965	113.823	3.68181	45.4776	2.73868	231.323	2.83784	54.5596	2.80281	595.004	3.68748	105.959	2.75625	12477	2.21908	61.7981	4.03854	527.792	3.00037	732.832
MPU-18.1	15.4127	29.0312	237.629	63.8942	1434.33	25.6764	7.16196	132.118	6.01066	4.91647	44.273	52.6117	2912.28	2.22208	0.0410436	45.5704	2.81303	3.18896	0.049907	17.5691	1.1659	10.5992	4.28738	6.67194	0.347321	9.16937	37.8148	5.07634	16.4607	2.76077	250.363	3.15853	101.827	2.59171	501.453	2.13298	111.674	1.69567	1122.92	3.66613	196.198	2.74327	10870	2.16145	93.6372	3.71201	462.464	3.43635	700.418
MPU-25.1	14.5384	29.4389	36.9758	34.2029	1524.47	25.7155	6.82192	37.0528	5.38373	2.87443	6.45179	38.0067	2954.58	2.27074	0.0679204	23.6455	0.926824	3.89863	0.0596306	16.8821	1.42087	10.2566	5.14222	9.20102	0.215812	10.9362	36.2311	5.0928	17.8965	2.314	246.605	3.41489	100.639	2.60749	481.536	2.136	106.244	1.70087	1085.21	3.66798	183.762	3.17131	11024.3	2.47914	71.5157	5.48137	661.99	3.14383	691.065
MPU-27.1	12.3079	29.5748	47.6417	34.1809	845.562	25.7144	1.34602	43.8112	4.94486	2.49399	8.37942	37.988	1637.6	2.2419	0.0139669	29.3777	0.813538	4.3614	0.0153166	37.0877	0.469487	14.5034	2.38533	11.5944	0.113561	13.2709	18.8924	5.29101	9.43634	4.26141	142.089	3.22438	55.6855	2.64358	265.629	2.17525	60.6665	1.79676	587.09	3.70794	104.241	2.75482	11810.1	2.15543	50.5189	4.62829	415.222	2.97064	683.967
MPU-30.1	16.689	28.6142	24.1162	34.2376	1037.83	25.6802	1.75983	42.1623	6.39869	2.67908	3.93237	38.105	2062.19	2.22309	0.00206957	44.0259	2.34545	4.77426	0.0305138	22.4686	1.03007	22.3805	3.95002	9.72019	0.324548	9.60411	30.7245	5.25915	12.1634	2.39375	178.191	3.17847	72.0322	2.62202	344.961	2.15758	74.0677	1.73119	754.522	3.69553	130.018	2.74657	10723.1	2.15244	85.6148	4.00988	396.976	3.04032	705.811
MPU-34.1	18.317	27.1846	90.0152	34.1876	590.822	25.6639	1.64832	42.4977	4.55801	3.10176	10.6913	37.9797	991.2	2.22576	0.008932	48.2552	0.462859	4.79003	0.0150484	23.0569	0.249531	19.8998	1.65946	7.91186	0.0366828	25.3841	13.3898	5.48423	6.40879	2.59423	87.2473	3.2927	31.9667	2.73317	151.594	2.6799	34.2927	1.87524	355.107	3.89339	61.9188	3.38727	11858.2	2.14998	24.1345	5.22056	315.622	3.02345	677.265
MPU-35.1	16.001	28.4421	39.5253	35.5556	1258.57	25.6626	3.08092	39.0084	5.49351	2.39181	4.7886	38.2881	2498.05	2.31888	0.0166921	65.8079	1.75656	3.61993	0.03021	22.8284	0.76188	12.1589	4.0041	7.02161	0.260376	17.164	31.6992	5.2347	14.2954	2.35269	211.123	3.18947	87.0755	2.60312	420.812	2.15374	92.1424	1.7092	926.841	3.73689	156.533	2.75492	10866.7	2.15825	57.5149	4.48369	354.478	2.99959	692.766
MPU-46.1	16.8153	27.6101	60.2714	34.1803	782.967	25.6897	5.78989	38.2179	2.73622	7.23734	8.33994	37.9893	1176.03	2.59992	0.157198	15.2903	0.87403	4.28678	0.124508	13.169	1.03997	10.7649	1.60733	7.86413	0.117212	30.4184	10.7397	5.60198	5.96341	2.78763	92.0518	3.24647	38.78	2.69073	186.547	2.57024	44.0538	1.78334	466.693	3.71063	81.9846	2.80345	12796.6	2.15701	16.6544	6.76016	534.604	2.99092	637.324
MPU-86.1	24.8684	26.3914	29.0191	34.3179	1212.36	25.7049	11.339	54.5256	5.17357	2.96858	11735.5	40.1292	2500	2.22248	0.00148502	50.7536	2.06063	3.32885	0.0414651	20.0166	0.699671	12.6772	3.3674	6.90332	0.239874	10.539	27.4588	5.29253	13.3866	3.24713	207.986	3.16777	87.2508	2.60373	425.143	2.14232	94.1703	1.70853	951.095	3.67083	165.44	2.75211	11227.9	2.16155	69.4646	6.46935	423.327	2.97255	687.728
Sample Name	F ppm		Al ppm		P ppm		Ca ppm		Ti ppm		Fe ppm		Y ppm		La ppm		Ce ppm		Pr ppm		Nd ppm		Sm ppm		Eu ppm		Gd ppm		Tb ppm		Dy ppm		Ho ppm		Er ppm		Tm ppm		Yb ppm		Lu		Hf ppm		Th ppm		U ppm		T (Ti)
G8 Median	46.8137		1.83989		82.9376		2.39504		9.31726		5.53456		451.447		0.00782575		15.3279		0.0923845		1.28623		2.1524		0.0579495		9.80434		3.42359		39.8832		13.8661		58.096		11.6635		103.067		16.4908		11252.2		248.976		1310.75		739.506
91500 median	16.09		12.4819		12.4249		2.31807		4.60789		6.63903		125.468		0.0039421		2.32359		0.0103667		0.118087		0.273752		0.204737		1.84736		0.815421		11.0825		4.40943		22.2933		5.65221		66.3454		12.2026		5300.7		26.2457		69.8719		678.155
91500Setup median	14.5698		12.6632		11.5618		1.86718		4.66487		3.63108		130.043		-0.00278663		2.31477		0.00458957		0.0959016		0.281094		0.205059		1.86281		0.764477		10.4734		4.31193		22.534		5.63126		65.3056		11.7766		5512.47		26.9004		73.8441		679.162
M127 median	15.1404		4.63475		194.469		1.73229		6.01595		3.02266		803.84		0.00515953		16.1036		0.0980152		1.83648		3.80115		0.27197		16.982		5.67479		68.9799		26.0748		120.45		27.7284		289.334		52.9284		11602.2		405.539		843.205		700.493
MPC Median	16.0567		31.5076		1074.9		2.63498		5.32033		3.87091		2188.36		0.00329311		1.77394		0.0243976		0.771398		3.46589		0.246275		27.5852		12.6693		187.109		76.0058		353.436		77.839		775.685		131.212		11028.6		63.9931		397.977		690.07
MPU Median	16.345		38.2505		1141.75		5.9743		5.29101		8.35968		2286.22		0.0288678		1.96451		0.0456861		1.00211		3.87271		0.265581		28.4868		12.9367		192.638		78.5357		386.207		88.6444		906.41		154.523		11278.4		70.4901		441.876		689.606
Sample Name	F ppm		Al ppm		P ppm		Ca ppm		Ti ppm		Fe ppm		Y ppm		La ppm		Ce ppm		Pr ppm		Nd ppm		Sm ppm		Eu ppm		Gd ppm		Tb ppm		Dy ppm		Ho ppm		Er ppm		Tm ppm		Yb ppm		Lu		Hf ppm		Th ppm		U ppm		T (Ti)
G8 Mean	46.9494		1.80237		82.5387		2.89297		9.16139		5.39983		446.693		0.00969976		14.7513		0.0915503		1.34495		2.18634		0.0704997		9.78785		3.30617		39.0382		13.2891		56.4235		11.3044		101.978		15.9694		11016.1		244.055		1289.87		737.944
91500 Mean	17.4557		19.7453		11.3615		2.31419		4.8563		6.51347		119.059		0.00628456		2.22326		0.0112319		0.123158		0.280163		0.199419		1.77221		0.737546		10.0779		4.07811		21.0324		5.30181		62.7928		10.9007		5309.5		24.9897		70.8476		682.472
91500Setup Mean	16.5261		16.3842		10.5078		2.09249		4.69169		3.92659		125.625		-0.00203577		2.19952		0.00484566		0.100894		0.293302		0.201039		1.86713		0.728521		10.4042		4.29082		21.9792		5.59445		65.2411		11.5767		5412.75		25.0008		73.2462		679.632
M127 Mean	14.5811		10.789		398.731		3.96802		5.85697		3.22399		1114.3		0.00220244		13.1113		0.0856619		1.69066		3.62756		0.245829		19.0924		7.08445		94.6428		37.1354		173.625		39.6637		405.037		71.7442		11494.6		333.645		761.937		698.202
MPC Mean	15.4451		32.7378		1069.5		2.98606		5.27674		4.42356		2128.62		0.000975998		2.09786		0.0283462		0.772084		3.24776		0.26186		25.9596		12.1333		179.905		74.1012		351.737		77.9686		783.161		132.799		10976.8		67.2663		388.114		689.38
MPU Mean	29.3203		63.3223		1120.19		9.36683		5.23772		848.8		2180.77		0.324587		4.03163		0.460516		3.85944		4.50581		0.4219		26.482		12.2291		181.679		75.1192		365.735		82.5909		842.537		145.188		11430		70.7316		460.182		688.759
Sample Name
G8 Median
91500 median
91500Setup median
M127 median
MPC Median
MPU Median
[truncated: 5 more columns]

## Sheet: Median summary
A	G8	M127	T2U	T2C	91U	91C	QNU	QNC	OGU	OGC	B	G8	91500	91500 Setup	M127	MPU	MPC
F ppm	46.4606	15.355	14.5281	14.1168	15.854	17.4143	14.3345	14.7136	16.2714	15.5245	F ppm	46.8137	16.09	14.5698	15.1404	16.345	16.0567
Al ppm	1.54489	3.89291	1.89178	4.09938	11.8147	9.72446	0.0791995	0.12247	1.88573	2.22245	Al ppm	1.83989	12.4819	12.6632	4.63475	38.2505	31.5076
P ppm	81.4793	189.597	128.102	193.186	10.8048	9.72779	258.987	220.333	165.519	126.992	P ppm	82.9376	12.4249	11.5618	194.469	1141.75	1074.9
Ca ppm	2.3109	2.55509	2.48065	2.46405	2.50599	3.46574	2.51668	1.64381	2.54316	3.15242	Ca ppm	2.39504	2.31807	1.86718	1.73229	5.9743	2.63498
Ti ppm	9.46738	5.76783	9.63736	7.66775	4.35055	4.64783	15.5817	14.3987	8.14652	6.34324	Ti ppm	9.31726	4.60789	4.66487	6.01595	5.29101	5.32033
Fe ppm	4.20233	2.09782	1.12674	3.96168	3.69518	3.09728	5.11425	4.45871	38.1484	55.495	Fe ppm	5.53456	6.63903	3.63108	3.02266	8.35968	3.87091
Y ppm	456.382	780.164	1186.09	1036.68	121.212	132.362	809.471	1032.54	1142.28	634.956	Y ppm	451.447	125.468	130.043	803.84	2286.22	2188.36
La ppm	0.00545296	0.00539849	0.0156665	0.00332533	-0.00452482	0.00695136	0.00607061	0.0227103	0.031932	0.00726881	La ppm	0.00782575	0.0039421	-0.00278663	0.00515953	0.0288678	0.00329311
Ce ppm	15.4223	15.9572	3.74932	3.72121	2.16812	2.23201	18.3471	18.2447	12.286	10.2412	Ce ppm	15.3279	2.32359	2.31477	16.1036	1.96451	1.77394
Pr ppm	0.0911891	0.0915754	0.208407	0.0437892	0.00896786	0.0113025	0.0869614	0.232075	0.272525	0.0675055	Pr ppm	0.0923845	0.0103667	0.00458957	0.0980152	0.0456861	0.0243976
Nd ppm	1.24789	1.90441	3.59221	1.00021	0.120028	0.15688	1.54456	4.26697	4.84194	1.33349	Nd ppm	1.28623	0.118087	0.0959016	1.83648	1.00211	0.771398
Sm ppm	2.31341	3.93887	5.97916	2.95364	0.256737	0.377047	3.6056	7.0118	7.58144	2.58191	Sm ppm	2.1524	0.273752	0.281094	3.80115	3.87271	3.46589
Eu ppm	0.0686754	0.256937	1.13338	0.847347	0.176475	0.231631	0.407503	1.19403	1.98306	0.969338	Eu ppm	0.0579495	0.204737	0.205059	0.27197	0.265581	0.246275
Gd ppm	9.74162	16.2457	25.2518	16.775	1.72157	1.7811	16.4408	29.1513	26.9664	11.0876	Gd ppm	9.80434	1.84736	1.86281	16.982	28.4868	27.5852
Tb ppm	3.25356	5.58231	8.51786	6.40398	0.700804	0.727752	5.82141	9.15568	8.41943	3.70471	Tb ppm	3.42359	0.815421	0.764477	5.67479	12.9367	12.6693
Dy ppm	38.8011	66.5999	105.854	85.1728	9.8143	10.8527	71.1802	103.041	97.9095	46.8721	Dy ppm	39.8832	11.0825	10.4734	68.9799	192.638	187.109
Ho ppm	13.3426	24.958	39.8881	34.1069	4.0237	4.41029	27.6957	35.5658	37.3378	19.7758	Ho ppm	13.8661	4.40943	4.31193	26.0748	78.5357	76.0058
Er ppm	57.2385	119.542	188.804	165.077	20.5064	22.9353	123.928	154.319	169.228	101.783	Er ppm	58.096	22.2933	22.534	120.45	386.207	353.436
Tm ppm	11.5125	27.7688	40.6902	36.6544	5.44218	6.03863	26.05	30.5845	37.63	24.8331	Tm ppm	11.6635	5.65221	5.63126	27.7284	88.6444	77.839
Yb ppm	103.912	290.544	417.663	386.582	61.5527	70.1588	256.644	292.438	386.133	287.509	Yb ppm	103.067	66.3454	65.3056	289.334	906.41	775.685
Lu	16.1047	52.0849	70.8005	69.2675	11.2035	12.658	42.9057	49.2806	69.2321	54.6088	Lu	16.4908	12.2026	11.7766	52.9284	154.523	131.212
Hf ppm	11350.6	11472	7959.92	8668.27	5387.77	5233.3	10196.2	9976.66	8260.84	8758.78	Hf ppm	11252.2	5300.7	5512.47	11602.2	11278.4	11028.6
Th ppm	254.387	397.404	78.4828	117.625	23.2656	22.845	128.478	207.049	133.561	85.5317	Th ppm	248.976	26.2457	26.9004	405.539	70.4901	63.9931
U ppm	1349.04	850.746	155.784	283.387	69.7376	70.8826	166.18	229.651	137.958	149.552	U ppm	1310.75	69.8719	73.8441	843.205	441.876	397.977
T (Ti), °C	740.991	696.895	742.649	721.75	673.474	678.862	789.561	781.557	727.203	705.057	T (Ti), °C	739.506	678.155	679.162	700.493	689.606	690.07
P sat	0.343419	0.402779	0.174678	0.301219	0.136845	0.110924	0.608026	0.328118	0.229912	0.378876	P sat	0.350875	0.143692	0.133969	0.415601	0.853464	0.859268
λ0	3.21909	3.75771	4.30167	3.67974	1.82869	2.04067	3.72724	4.30435	4.42578	3.55201	λ0	3.2651	1.91737	1.59636	3.7656	4.02691	4.3903
λ1	-52.786	-58.2569	-54.899	-64.6345	-58.3041	-55.7344	-58.0306	-51.3492	-51.0104	-57.9789	λ1	-51.7859	-58.1314	-66.3529	-58.4328	-71.6103	-63.9561
λ2	-216.472	-202.142	-175.941	-202.111	-32.368	-2.31313	-206.035	-197.224	-150.496	-130.198	λ2	-195.296	-29.4493	-148.529	-205.536	-210.998	-80.4533
λ3	-1160.66	-1668.96	-1384.36	-691.596	590.468	719.822	-996.004	-1078.14	-1378.56	-1375.03	λ3	-791.715	746.864	-389.258	-1662.16	778.743	1919.59
A: Mount GA6363. B: Mount GA6364
